# Supplementary material
Source: PubMed Central journal article supplement (PMC6347495)

## Supplementary Information for

# Enantioselective $\alpha$ -Functionalizations of Ketones via Allylic Substitution of Silyl Enol Ethers

Zhi-Tao He, John F. Hartwig\*

*Department of Chemistry, University of California, Berkeley, California, 94720, United States*

### Table of Contents

|                                                                                                      |     |
|------------------------------------------------------------------------------------------------------|-----|
| 1. General information .....                                                                         | S2  |
| 2. Synthesis of substrates .....                                                                     | S2  |
| 2.1 General procedures for the synthesis of $\alpha,\beta$ -unsaturated ketone substrates .....      | S2  |
| 2.2 General procedures for the TBS protection of $\alpha,\beta$ -unsaturated ketone substrates ..... | S4  |
| 2.3 Synthesis of peptide substrates .....                                                            | S7  |
| 2.4 General procedure for the preparation of lithium phenoxide derivatives .....                     | S9  |
| 2.5 General procedure for the preparation of sodium arenethiolate derivatives .....                  | S9  |
| 3. Initial trials .....                                                                              | S9  |
| 4. Development of the process for the construction of C-N bonds .....                                | S10 |
| 5. Determination of absolute configuration of <b>7a</b> .....                                        | S11 |
| 6. Scope of substrates .....                                                                         | S12 |
| 6.1 Scope for the construction of an alpha C-N bond .....                                            | S12 |
| 6.2 Scope for the construction of an alpha C-O bond .....                                            | S25 |
| 6.3 Scope for the construction of an alpha C-S bond .....                                            | S28 |
| 6.4 Scope for the construction of an alpha C-C bond .....                                            | S32 |
| 7. Transformations .....                                                                             | S37 |
| 8. References .....                                                                                  | S43 |
| 9. Copies of $^1\text{H}$ NMR, $^{13}\text{C}$ NMR, $^{19}\text{F}$ NMR and DEPT spectra .....       | S44 |

## 1. General information

All air-sensitive manipulations were conducted under an inert atmosphere in a nitrogen-filled glovebox or by using Schlenk techniques. All dry solvents were obtained by passing it through a solvent column composed of activated A-1 alumina and further degassed by the freeze-pump-thaw method. Unless otherwise indicated, all commercially available starting materials were purchased and used directly without further purification. The  $^1\text{H}$  and  $^{13}\text{C}$  NMR spectra were acquired on 400 MHz or 600 MHz Bruker instruments at the University of California, Berkeley. Chemical shifts are reported in  $\delta$  (ppm) with reference to residual solvent peaks ( $\text{CHCl}_3$  in  $\text{CDCl}_3$ : 7.26 ppm for  $^1\text{H}$  NMR and 77.10 ppm for  $^{13}\text{C}$  NMR). Coupling constants ( $J$ ) are reported in Hz. Optical rotation values were measured by a Perkin Elmer 241 Automatic Polarimeter.

## 2. Synthesis of substrates

### 2.1 General procedures for the synthesis of $\alpha,\beta$ -unsaturated ketone substrates.

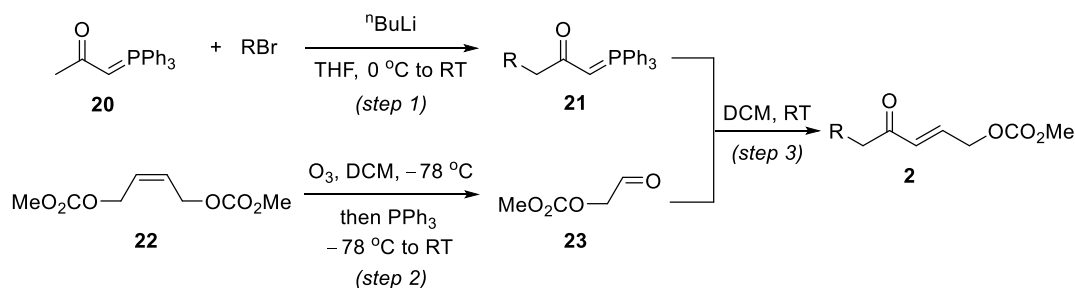

Step 1: To a well stirred solution of **20** (4.77 g, 15.0 mmol) and THF (120 mL) under  $\text{N}_2$  atmosphere at  $-78\text{ }^\circ\text{C}$  was added  $n\text{-BuLi}$  (2.5 M in THF, 9.0 mL) dropwise. The resulting mixture was stirred at  $-78\text{ }^\circ\text{C}$  for an additional 1 h. Then, the alkyl bromide (22.5 mmol) in THF (15 mL) was added to the above solution slowly. After addition was complete, the reaction solution was allowed to gradually warm to room temperature and was stirred for 12 h. The reaction was quenched with water (200 mL) and extracted with ethyl acetate ( $150\text{ mL} \times 3$ ). The organic layer was dried by with anhydrous  $\text{Na}_2\text{SO}_4$  and condensed to afford ylide **21** without further purification.

Step 2: Through a solution of dicarbonate **22** (1.54 g, 7.50 mmol) in  $\text{DCM}$  (50 mL) at  $-78\text{ }^\circ\text{C}$  in a 100 mL flask was bubbled ozone gas until the solution sustained a blue color. Then,  $\text{PPh}_3$  (2.34 g, 22.5 mmol) was added to the reaction mixture in one portion. The reaction was stirred at room temperature for an additional 6 h to afford a solution of aldehyde **23**.

Step 3: To the above solution of **23** was added ylide **21** in  $\text{DCM}$  (10 mL) at room temperature. The resulting mixture was stirred for 12 h. After this time, the reaction solution was condensed, and the residue was purified by flash column chromatography using hexane/ethyl acetate as eluent to afford the pure substrates **2**.

### (*E*)-Methyl (4-oxopent-2-en-1-yl) carbonate (**2a**)<sup>[1]</sup>

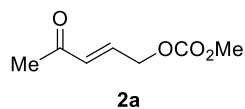

Yellow oil. 2.1 g, 87% yield.  $^1\text{H}$  NMR (400 MHz,  $\text{CDCl}_3$ )  $\delta$  (ppm) 6.76 (dt,  $J = 16.0\text{ Hz}$ ,  $J = 4.8\text{ Hz}$ , 1H), 6.30 (dt,  $J = 16.0\text{ Hz}$ ,  $J = 2.0\text{ Hz}$ , 1H), 4.82 (dd,  $J = 4.8\text{ Hz}$ ,  $J = 2.0\text{ Hz}$ , 2H), 3.83 (s, 3H), 2.28 (s, 3H);  $^{13}\text{C}$  NMR (100 MHz,  $\text{CDCl}_3$ )  $\delta$  (ppm) 197.52, 155.28, 138.99, 130.98, 65.92, 55.12, 27.44; HRMS (EI):  $[\text{M}]^+$  calcd for  $\text{C}_7\text{H}_{10}\text{O}_4^+$  158.0579, found 158.0582.

**(E)-Methyl (4-oxonon-2-en-1-yl) carbonate (2b)**

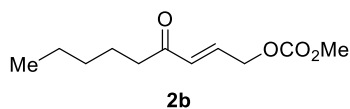

Yellow oil. 1.9 g, 60% yield.  $^1\text{H}$  NMR (400 MHz,  $\text{CDCl}_3$ )  $\delta$  (ppm) 6.76 (dt,  $J = 16.0$  Hz,  $J = 4.8$  Hz, 1H), 6.30 (dt,  $J = 16.0$  Hz,  $J = 2.0$  Hz, 1H), 4.79 (dd,  $J = 4.8$  Hz,  $J = 2.0$  Hz, 2H), 3.80 (s, 3H), 2.53 (t,  $J = 7.6$  Hz, 2H), 1.63 – 1.55 (m, 2H), 1.33 – 1.25 (m, 4H), 0.87 (t,  $J = 6.8$  Hz, 3H);  $^{13}\text{C}$  NMR (100 MHz,  $\text{CDCl}_3$ )  $\delta$  (ppm) 199.89, 155.37, 137.87, 130.14, 66.15, 55.19, 40.90, 31.42, 23.66, 22.48, 13.95; HRMS (ESI):  $[\text{M}+\text{Na}]^{\oplus}$  calcd for  $\text{C}_{11}\text{H}_{18}\text{O}_4\text{Na}^{\oplus}$  237.1097, found 237.1099.

**(E)-Methyl (8-methyl-4-oxonon-2-en-1-yl) carbonate (2c)**

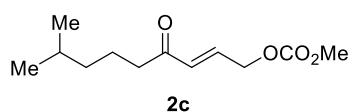

Yellow oil. 2.3 g, 67% yield.  $^1\text{H}$  NMR (400 MHz,  $\text{CDCl}_3$ )  $\delta$  (ppm) 6.78 (dt,  $J = 16.0$  Hz,  $J = 4.8$  Hz, 1H), 6.32 (dt,  $J = 16.0$  Hz,  $J = 2.0$  Hz, 1H), 4.81 (dd,  $J = 4.8$  Hz,  $J = 2.0$  Hz, 2H), 3.83 (s, 3H), 2.53 (t,  $J = 7.2$  Hz, 2H), 1.65 – 1.49 (m, 3H), 1.21 – 1.15 (m, 2H), 0.88 (d,  $J = 6.8$  Hz, 6H);  $^{13}\text{C}$  NMR (100 MHz,  $\text{CDCl}_3$ )  $\delta$  (ppm) 199.81, 155.37, 137.82, 130.16, 66.15, 55.19, 41.18, 38.49, 27.89, 22.52, 21.83; HRMS (ESI):  $[\text{M}+\text{Na}]^{\oplus}$  calcd for  $\text{C}_{12}\text{H}_{20}\text{O}_4\text{Na}^{\oplus}$  251.1254, found 251.1252.

**(E)-7-Cyclohexyl-4-oxohept-2-en-1-yl methyl carbonate (2d)**

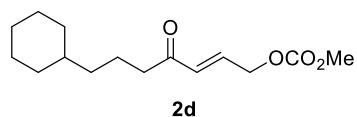

Yellow oil. 1.7 g, 43% yield.  $^1\text{H}$  NMR (400 MHz,  $\text{CDCl}_3$ )  $\delta$  (ppm) 6.77 (dt,  $J = 16.0$  Hz,  $J = 4.8$  Hz, 1H), 6.32 (d,  $J = 16.0$  Hz, 1H), 4.81 (dd,  $J = 4.8$  Hz,  $J = 2.0$  Hz, 2H), 3.83 (s, 3H), 2.53 (t,  $J = 7.2$  Hz, 2H), 1.70 – 1.58 (m, 7H), 1.26 – 1.11 (m, 6H), 0.91 – 0.81 (m, 2H);  $^{13}\text{C}$  NMR (100 MHz,  $\text{CDCl}_3$ )  $\delta$  (ppm) 199.91, 155.40, 137.83, 130.19, 66.19, 55.22, 41.29, 37.56, 37.05, 33.31, 26.72, 26.41, 21.38; HRMS (ESI):  $[\text{M}+\text{Na}]^{\oplus}$  calcd for  $\text{C}_{15}\text{H}_{24}\text{O}_4\text{Na}^{\oplus}$  291.1567, found 291.1567.

**(E)-Methyl (4-oxo-7-phenylhept-2-en-1-yl) carbonate (2e)**

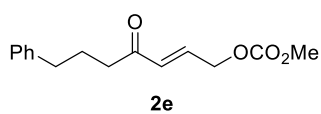

Yellow oil. 2.2 g, 56% yield.  $^1\text{H}$  NMR (400 MHz,  $\text{CDCl}_3$ )  $\delta$  (ppm) 7.28 (t,  $J = 7.2$  Hz, 2H), 7.21 – 7.16 (m, 3H), 6.74 (dt,  $J = 16.0$  Hz,  $J = 4.8$  Hz, 1H), 6.30 (dt,  $J = 16.0$  Hz,  $J = 2.0$  Hz, 1H), 4.80 (dd,  $J = 4.8$  Hz,  $J = 2.0$  Hz, 2H), 3.82 (s, 3H), 2.64 (t,  $J = 7.2$  Hz, 2H), 2.57 (t,  $J = 7.2$  Hz, 2H), 2.00 – 1.92 (m, 2H);  $^{13}\text{C}$  NMR (100 MHz,  $\text{CDCl}_3$ )  $\delta$  (ppm) 199.26, 155.25, 141.47, 137.97, 129.92, 128.44, 128.36, 125.94, 65.98, 55.08, 39.86, 34.97, 25.22; HRMS (ESI):  $[\text{M}+\text{Na}]^{\oplus}$  calcd for  $\text{C}_{15}\text{H}_{18}\text{O}_4\text{Na}^{\oplus}$  285.1097, found 285.1106.

**(E)-Methyl (4-oxonona-2,8-dien-1-yl) carbonate (2f)**

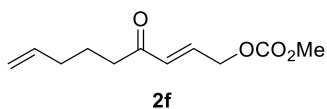

Yellow oil. 1.5 g, 46% yield.  $^1\text{H}$  NMR (400 MHz,  $\text{CDCl}_3$ )  $\delta$  (ppm) 6.77 (dt,  $J = 16.0$  Hz,  $J = 4.8$  Hz, 1H), 6.31 (d,  $J = 16.0$  Hz, 1H), 5.81 – 5.71 (m, 1H), 5.03 – 4.96 (m, 2H), 4.81 (dd,  $J = 4.8$  Hz,  $J = 2.0$  Hz, 2H), 3.82 (s, 3H), 2.56 (t,  $J = 7.2$  Hz, 2H), 2.07 (q,  $J = 7.2$  Hz, 2H), 1.75 – 1.68 (m, 2H);  $^{13}\text{C}$  NMR (100 MHz,  $\text{CDCl}_3$ )  $\delta$  (ppm) 199.51, 155.32, 137.97, 137.90, 130.06, 115.34, 66.08, 55.15, 39.94, 33.03, 22.86; HRMS (ESI):  $[\text{M}+\text{Na}]^{\oplus}$  calcd for  $\text{C}_{11}\text{H}_{16}\text{O}_4\text{Na}^{\oplus}$  235.0941, found 235.0941.

### (E)-9-Fluoro-4-oxonon-2-en-1-yl methyl carbonate (2g)

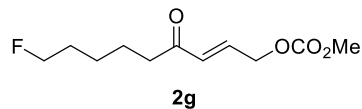

Yellow oil. 1.4 g, 40% yield.  $^1\text{H}$  NMR (400 MHz,  $\text{CDCl}_3$ )  $\delta$  (ppm) 6.78 (dt,  $J = 16.0$  Hz,  $J = 4.4$  Hz, 1H), 6.32 (d,  $J = 16.0$  Hz, 1H), 4.81 (dd,  $J = 4.4$  Hz,  $J = 1.2$  Hz, 2H), 4.49 (t,  $J = 6.0$  Hz, 1H), 4.37 (t,  $J = 6.0$  Hz, 1H), 3.82 (s, 3H), 2.58 (t,  $J = 7.2$  Hz, 2H), 1.77 – 1.62 (m, 4H), 1.45 – 1.38 (m, 2H);  $^{13}\text{C}$  NMR (100 MHz,  $\text{CDCl}_3$ )  $\delta$  (ppm) 199.36, 155.35, 138.09, 130.00, 83.89 (d,  $J_{\text{CF}} = 162.9$  Hz), 66.09, 55.20, 40.65, 30.24 (d,  $J_{\text{CF}} = 19.6$  Hz), 24.89 (d,  $J_{\text{CF}} = 5.1$  Hz), 23.42;  $^{19}\text{F}$  NMR (376 MHz,  $\text{CDCl}_3$ )  $\delta$  -217.39 – -217.77 (m, 1F); HRMS (ESI):  $[\text{M}+\text{Na}]^{\oplus}$  calcd for  $\text{C}_{11}\text{H}_{17}\text{O}_4\text{FNa}^{\oplus}$  255.1003, found 255.1007.

### (E)-8,8,9,9,10,10,10-Heptafluoro-4-oxodec-2-en-1-yl methyl carbonate (2h)

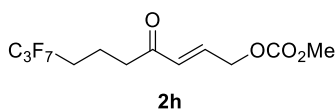

Yellow oil. 1.9 g, 35% yield.  $^1\text{H}$  NMR (400 MHz,  $\text{CDCl}_3$ )  $\delta$  (ppm) 6.81 (dt,  $J = 16.0$  Hz,  $J = 4.4$  Hz, 1H), 6.33 (d,  $J = 16.0$  Hz, 1H), 4.82 (d,  $J = 2.4$  Hz, 2H), 3.82 (s, 3H), 2.69 (t,  $J = 6.8$  Hz, 2H), 2.17 – 2.04 (m, 2H), 1.98 – 1.91 (m, 2H);  $^{13}\text{C}$  NMR (100 MHz,  $\text{CDCl}_3$ )  $\delta$  (ppm) 197.74, 155.35, 138.68, 129.60, 65.98, 55.24, 39.42, 29.73 (t,  $J_{\text{CF}} = 142.0$  Hz), 14.54 (three carbon signals from  $\text{C}_3\text{F}_7$  unit did not appear);  $^{19}\text{F}$  NMR (376 MHz,  $\text{CDCl}_3$ )  $\delta$  -79.72 – -79.77 (m, 3F), -114.59 – -114.66 (m, 2F), -127.01 (s, 2F); HRMS (ESI):  $[\text{M}+\text{Na}]^{\oplus}$  calcd for  $\text{C}_{12}\text{H}_{13}\text{O}_4\text{F}_7\text{Na}^{\oplus}$  377.0594, found 377.0608.

### (E)-Methyl (4-oxo-7-phenoxyhept-2-en-1-yl) carbonate (2i)

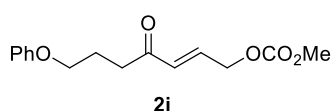

Yellow oil. 2.3 g, 51% yield.  $^1\text{H}$  NMR (400 MHz,  $\text{CDCl}_3$ )  $\delta$  (ppm) 7.29 – 7.25 (m, 2H), 6.94 (td,  $J = 7.2$  Hz,  $J = 0.8$  Hz, 1H), 6.88 (d,  $J = 8.8$  Hz, 2H), 6.81 (dt,  $J = 16.0$  Hz,  $J = 4.4$  Hz, 1H), 6.35 (dt,  $J = 16.0$  Hz,  $J = 1.6$  Hz, 1H), 4.81 (dd,  $J = 4.4$  Hz,  $J = 1.6$  Hz, 2H), 3.99 (t,  $J = 6.0$  Hz, 2H), 3.82 (s, 3H), 2.80 (t,  $J = 7.2$  Hz, 2H), 2.15 – 2.08 (m, 2H);  $^{13}\text{C}$  NMR (100 MHz,  $\text{CDCl}_3$ )  $\delta$  (ppm) 198.87, 158.84, 155.34, 138.25, 130.08, 129.50, 120.76, 114.48, 66.62, 66.05, 55.19, 37.09, 23.49; HRMS (ESI):  $[\text{M}+\text{Na}]^{\oplus}$  calcd for  $\text{C}_{15}\text{H}_{18}\text{O}_5\text{Na}^{\oplus}$  301.1046, found 301.1046.

### (E)-7-(1,3-Dioxan-2-yl)-4-oxohept-2-en-1-yl methyl carbonate (2j)

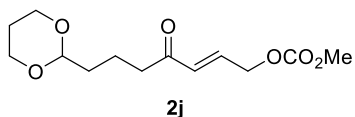

Yellow oil. 2.6 g, 64% yield.  $^1\text{H}$  NMR (400 MHz,  $\text{CDCl}_3$ )  $\delta$  (ppm) 6.77 (dt,  $J = 16.0$  Hz,  $J = 4.4$  Hz, 1H), 6.31 (dt,  $J = 16.0$  Hz,  $J = 2.0$  Hz, 1H), 4.80 (dd,  $J = 4.4$  Hz,  $J = 2.0$  Hz, 2H), 4.51 (t,  $J = 4.8$  Hz, 1H), 4.08 (dd,  $J = 10.4$  Hz,  $J = 4.8$  Hz, 2H), 3.82 (s, 3H), 3.74 (td,  $J = 12.4$  Hz,  $J = 2.4$  Hz, 2H), 2.59 (t,  $J = 7.2$  Hz, 2H), 2.12 – 2.00 (m, 1H), 1.77 – 1.68 (m, 2H), 1.63 – 1.58 (m, 2H), 1.34 – 1.31 (m, 1H);  $^{13}\text{C}$  NMR (100 MHz,  $\text{CDCl}_3$ )  $\delta$  (ppm) 198.94, 155.06, 137.74, 129.80, 101.77, 66.59, 65.85, 54.88, 40.20, 34.16, 25.58, 18.16; HRMS (ESI):  $[\text{M}+\text{Na}]^{\oplus}$  calcd for  $\text{C}_{13}\text{H}_{20}\text{O}_6\text{Na}^{\oplus}$  295.1152, found 295.1142.

## 2.2 General procedures for the TBS protection of $\alpha,\beta$ -unsaturated ketones.

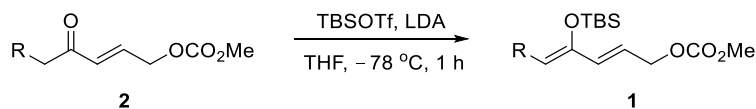

To a well stirred solution of  $\alpha,\beta$ -unsaturated ketone **2** (5.0 mmol, 1.0 equiv) and THF (50 mL) under



N<sub>2</sub> atmosphere at -78 °C was added TBSOTf (1.8 g, 7.0 mmol). The mixture was stirred for 10 min at -78 °C, at which time LDA (0.2 M in THF, 30 mL) was added dropwise. The resulting mixture was stirred at -78 °C for 1 h. The reaction was quenched by addition of MeOH (0.5 mL), condensed and purified by flash column chromatography using hexane/ethyl acetate as eluent to afford the pure silyl enolates **1**.

**(E)-4-((tert-Butyldimethylsilyl)oxy)penta-2,4-dien-1-yl methyl carbonate (1a)**

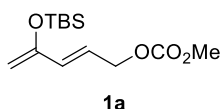

Silyl enolate **1a** was synthesized by a method that was different from the general procedure: To a well stirred solution of **2a** (1.2 g, 4.2 mmol) and THF (22 mL) under N<sub>2</sub> atmosphere at 0 °C was added Et<sub>3</sub>N (2.5 mL, 11 mmol). Then, TBSOTf (2.0 mL, 5.1 mmol) was added dropwise, and the resulting solution was kept at 0 °C for 1 h. At this time, the reaction was quenched by addition of saturated NaHCO<sub>3</sub> (aq) (30 mL) and extracted with ethyl acetate (30 mL × 3). The organic layer was condensed and purified by flash column chromatography (hexane/ethyl acetate = 100/1 – 20/1) to afford the pure substrate **1a**. Colorless oil. 0.87 g, 76% yield. <sup>1</sup>H NMR (400 MHz, CDCl<sub>3</sub>) δ (ppm) 6.15 (d, *J* = 15.2 Hz, 1H), 6.03 (dt, *J* = 15.2 Hz, *J* = 6.0 Hz, 1H), 4.70 (d, *J* = 6.0 Hz, 2H), 4.35 (d, *J* = 4.4 Hz, 2H), 3.79 (s, 3H), 0.96 (s, 9H), 0.18 (s, 6H); <sup>13</sup>C NMR (100 MHz, CDCl<sub>3</sub>) δ (ppm) 155.60, 154.04, 132.08, 123.19, 96.96, 67.55, 54.77, 25.80, 18.26, -4.69; HRMS (ESI): [M+Na]<sup>⊕</sup> calcd for C<sub>13</sub>H<sub>24</sub>O<sub>4</sub>SiNa<sup>⊕</sup> 295.1336, found 295.1328.

**(E)-Methyl (4-((trimethylsilyl)oxy)penta-2,4-dien-1-yl) carbonate (4a)**

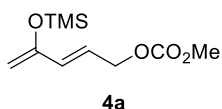

**4a** was prepared by a synthetic procedure that was the same as that used to prepare **1a**, except that TMSOTf was instead of TBSOTf. Colorless oil, 0.28 g, 29% yield. <sup>1</sup>H NMR (400 MHz, CDCl<sub>3</sub>) δ 6.15 (d, *J* = 15.3 Hz, 1H), 6.00 (dt, *J* = 15.2, 6.0 Hz, 1H), 4.70 (d, *J* = 6.0 Hz, 2H), 4.37 (s, 2H), 3.80 (s, 3H), 0.23 (s, 9H); <sup>13</sup>C NMR (101 MHz, CDCl<sub>3</sub>) δ 155.67, 153.87, 131.90, 123.37, 97.24, 67.61, 54.91, 0.07; HRMS (ESI): [M+H]<sup>⊕</sup> calcd for C<sub>10</sub>H<sub>19</sub>O<sub>4</sub>Si<sup>⊕</sup> 231.1047, found 231.1040.

**(2E,4Z)-4-((tert-Butyldimethylsilyl)oxy)nona-2,4-dien-1-yl methyl carbonate (1b)**

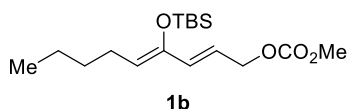

Colorless oil, 0.82 g, 50% yield. <sup>1</sup>H NMR (400 MHz, CDCl<sub>3</sub>) δ (ppm) 6.12 (d, *J* = 15.2 Hz, 1H), 5.80 (dt, *J* = 15.2 Hz, *J* = 6.8 Hz, 1H), 4.82 (t, *J* = 7.2 Hz, 1H), 4.65 (d, *J* = 6.4 Hz, 2H), 3.77 (s, 3H), 2.08 (dd, *J* = 14.0 Hz, *J* = 7.2 Hz, 2H), 1.33 – 1.30 (m, 4H), 0.98 (s, 9H), 0.88 (t, *J* = 7.2 Hz, 3H), 0.09 (s, 6H); <sup>13</sup>C NMR (100 MHz, CDCl<sub>3</sub>) δ (ppm) 155.70, 147.08, 133.93, 120.47, 117.86, 68.12, 54.77, 31.63, 26.00, 25.90, 22.50, 18.44, 13.98, -3.66; HRMS (ESI): [M+Na]<sup>⊕</sup> calcd for C<sub>17</sub>H<sub>32</sub>O<sub>4</sub>SiNa<sup>⊕</sup> 351.1962, found 351.1959.

**(2E,4Z)-4-((tert-Butyldimethylsilyl)oxy)-8-methylnona-2,4-dien-1-yl methyl carbonate (1c)**

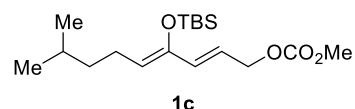

Colorless oil, 0.89 g, 52% yield. <sup>1</sup>H NMR (400 MHz, CDCl<sub>3</sub>) δ (ppm) 6.12 (d, *J* = 15.2 Hz, 1H), 5.80 (dt, *J* = 15.2 Hz, *J* = 6.4 Hz, 1H), 4.81 (t, *J* = 7.2 Hz, 1H), 4.65 (d, *J* = 6.4 Hz, 2H), 3.77 (s, 3H), 2.09 (dd, *J* = 15.6 Hz, *J* = 7.2 Hz, 2H), 1.60 – 1.50 (m, 1H), 1.22 (dd, *J* = 15.6 Hz, *J* = 7.2 Hz, 2H), 0.99 (s, 9H), 0.87 (d, *J* = 6.8 Hz, 6H), 0.10 (s, 6H); <sup>13</sup>C NMR (100 MHz, CDCl<sub>3</sub>) δ (ppm) 155.70, 146.99, 133.93, 120.47, 118.04, 68.13, 54.80, 38.58, 27.89, 26.01,

24.20, 22.55, 18.45, -3.63; HRMS (ESI):  $[M+Na]^{\oplus}$  calcd for  $C_{18}H_{34}O_4SiNa^{\oplus}$  365.2119, found 365.2121.

**(2E,4Z)-4-((tert-Butyldimethylsilyl)oxy)-7-cyclohexylhepta-2,4-dien-1-yl methyl carbonate (1d)**

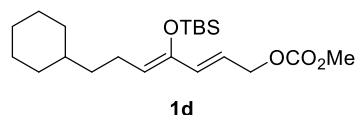

Colorless oil, 1.0 g, 53% yield.  $^1H$  NMR (400 MHz,  $CDCl_3$ )  $\delta$  (ppm) 6.12 (d,  $J = 15.2$  Hz, 1H), 5.80 (dt,  $J = 15.2$  Hz,  $J = 6.4$  Hz, 1H), 4.81 (t,  $J = 7.2$  Hz, 1H), 4.65 (d,  $J = 6.4$  Hz, 2H), 3.77 (s, 3H), 2.09 (dd,  $J = 14.8$  Hz,  $J = 7.2$  Hz, 2H), 1.70 – 1.60 (m, 5H), 1.26 – 1.14 (m, 6H), 0.99 (s, 9H), 0.90 – 0.83 (m, 2H), 0.09 (s, 6H);  $^{13}C$  NMR (100 MHz,  $CDCl_3$ )  $\delta$  (ppm) 155.70, 146.92, 133.97, 120.41, 118.19, 68.14, 54.79, 37.52, 37.17, 33.32, 26.74, 26.43, 26.02, 23.66, 18.45, -3.61; HRMS (ESI):  $[M+Na]^{\oplus}$  calcd for  $C_{21}H_{38}O_4SiNa^{\oplus}$  405.2432, found 405.2427.

**(2E,4Z)-4-((tert-Butyldimethylsilyl)oxy)-7-phenylhepta-2,4-dien-1-yl methyl carbonate (1e)**

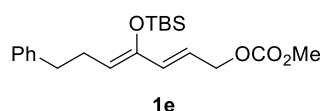

Colorless oil, 1.0 g, 55% yield.  $^1H$  NMR (400 MHz,  $CDCl_3$ )  $\delta$  (ppm) 7.29 (t,  $J = 7.2$  Hz, 2H), 7.21 – 7.18 (m, 3H), 6.13 (d,  $J = 15.2$  Hz, 1H), 5.84 (dt,  $J = 15.2$  Hz,  $J = 6.4$  Hz, 1H), 4.87 (t,  $J = 7.2$  Hz, 1H), 4.66 (d,  $J = 6.4$  Hz, 2H), 3.78 (s, 3H), 2.66 (t,  $J = 7.6$  Hz, 2H), 2.43 (dd,  $J = 15.6$  Hz,  $J = 7.6$  Hz, 2H), 1.00 (s, 9H), 0.11 (s, 6H);  $^{13}C$  NMR (100 MHz,  $CDCl_3$ )  $\delta$  (ppm) 155.66, 147.47, 141.84, 133.60, 128.42, 128.39, 125.89, 121.03, 116.33, 67.97, 54.76, 35.59, 27.89, 25.99, 18.42, -3.60; HRMS (ESI):  $[M+Na]^{\oplus}$  calcd for  $C_{21}H_{32}O_4SiNa^{\oplus}$  399.1962, found 399.1953.

**(2E,4Z)-4-((tert-Butyldimethylsilyl)oxy)nona-2,4,8-trien-1-yl methyl carbonate (1f)**

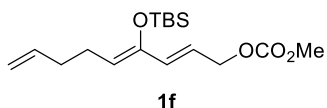

Colorless oil, 0.93 g, 57% yield.  $^1H$  NMR (400 MHz,  $CDCl_3$ )  $\delta$  6.12 (d,  $J = 15.4$  Hz, 1H), 5.85 – 5.74 (m, 2H), 5.01 (d,  $J = 17.2$  Hz, 1H), 4.95 (d,  $J = 10.2$  Hz, 1H), 4.84 (t,  $J = 7.1$  Hz, 1H), 4.64 (d,  $J = 6.5$  Hz, 2H), 3.77 (s, 3H), 2.19 (dd,  $J = 14.5$ , 7.1 Hz, 2H), 2.08 (dd,  $J = 14.1$ , 7.1 Hz, 2H), 0.98 (s, 9H), 0.09 (s, 6H);  $^{13}C$  NMR (100 MHz,  $CDCl_3$ )  $\delta$  155.67, 147.39, 138.17, 133.67, 120.83, 116.57, 114.87, 68.02, 54.78, 33.46, 25.99, 25.50, 18.44, -3.63; HRMS (ESI):  $[M+Na]^{\oplus}$  calcd for  $C_{17}H_{30}O_4SiNa^{\oplus}$  349.1806, found 349.1798.

**(2E,4Z)-4-((tert-Butyldimethylsilyl)oxy)-9-fluoronona-2,4-dien-1-yl methyl carbonate (1g)**

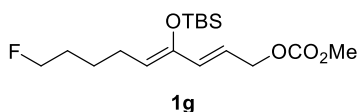

Colorless oil, 0.69 g, 40% yield.  $^1H$  NMR (400 MHz,  $CDCl_3$ )  $\delta$  6.11 (d,  $J = 15.4$  Hz, 1H), 5.81 (dt,  $J = 15.2$ , 6.5 Hz, 1H), 4.80 (t,  $J = 7.3$  Hz, 1H), 4.63 (d,  $J = 6.4$  Hz, 2H), 4.46 (t,  $J = 6.1$  Hz, 1H), 4.35 (t,  $J = 6.0$  Hz, 1H), 3.75 (s, 3H), 2.12 (q,  $J = 7.4$  Hz, 2H), 1.74 – 1.60 (m, 2H), 1.49 – 1.40 (m, 2H), 0.97 (s, 9H), 0.08 (s, 6H);  $^{13}C$  NMR (100 MHz,  $CDCl_3$ )  $\delta$  155.63, 147.57, 133.53, 120.93, 116.67, 83.85 (d,  $J_{CF} = 164.5$  Hz), 67.93, 54.73, 30.03 (d,  $J_{CF} = 19.5$  Hz), 25.93, 25.60, 25.03 (d,  $J_{CF} = 5.1$  Hz), 18.39, -3.69;  $^{19}F$  NMR (376 MHz,  $CDCl_3$ )  $\delta$  -217.40 – -217.85 (m, 1F); HRMS (ESI):  $[M+Na]^{\oplus}$  calcd for  $C_{17}H_{31}FO_4SiNa^{\oplus}$  369.1868, found 369.1865.

**(2E,4Z)-4-((tert-Butyldimethylsilyl)oxy)-8,8,9,9,10,10,10-heptafluorodeca-2,4-dien-1-yl methyl carbonate (1h)**

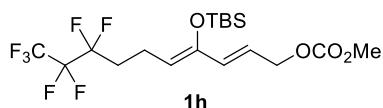

Colorless oil, 0.33 g, 14% yield.  $^1H$  NMR (400 MHz,  $CDCl_3$ )  $\delta$  6.11 (d,  $J = 15.5$  Hz, 1H), 5.96 – 5.77 (m, 1H), 4.80 (t,  $J = 7.3$  Hz, 1H), 4.66 (d,  $J = 6.2$  Hz, 2H), 3.77 (s, 3H), 2.40 (dd,  $J = 15.8$ , 7.6 Hz, 2H), 2.15 –

2.02 (m, 2H), 0.99 (s, 9H), 0.10 (s, 6H);  $^{13}\text{C}$  NMR (100 MHz,  $\text{CDCl}_3$ )  $\delta$  155.67, 148.90, 132.71, 122.34, 112.78, 67.73, 54.84, 30.42 (t,  $J_{\text{CF}} = 21.9$  Hz), 25.84, 18.39, 17.15, -3.70;  $^{19}\text{F}$  NMR (376 MHz,  $\text{CDCl}_3$ )  $\delta$  -79.92 (t,  $J = 9.3$  Hz, 3F), -114.95 – -115.02 (m, 2F), -127.20 (s, 2F) (three carbon signals from  $\text{C}_3\text{F}_7$  unit did not appear); HRMS (ESI):  $[\text{M}+\text{Na}]^{\oplus}$  calcd for  $\text{C}_{18}\text{H}_{27}\text{F}_7\text{O}_4\text{SiNa}^{\oplus}$  491.1459, found 491.1457.

### (2*E*,4*Z*)-4-((*tert*-Butyldimethylsilyl)oxy)-7-phenoxyhepta-2,4-dien-1-yl methyl carbonate (1i)

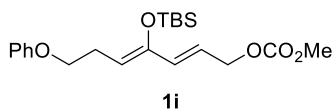

Colorless oil, 0.31 g, 16% yield.  $^1\text{H}$  NMR (400 MHz,  $\text{CDCl}_3$ )  $\delta$  7.31 – 7.26 (m, 2H), 6.97 – 6.90 (m, 3H), 6.18 (d,  $J = 15.2$  Hz, 1H), 5.89 (dt,  $J = 15.2, 6.3$  Hz, 1H), 5.00 (t,  $J = 7.1$  Hz, 1H), 4.68 (d,  $J = 6.3$  Hz, 2H), 3.96 (t,  $J = 6.7$  Hz, 2H), 3.80 (s, 3H), 2.61 (q,  $J = 6.7$  Hz, 2H), 1.02 (s, 9H), 0.14 (s, 6H);  $^{13}\text{C}$  NMR (100 MHz,  $\text{CDCl}_3$ )  $\delta$  158.97, 155.67, 148.77, 133.29, 129.48, 121.63, 120.73, 114.62, 112.26, 67.90, 67.09, 54.84, 26.48, 26.00, 18.45, -3.57; HRMS (ESI):  $[\text{M}+\text{Na}]^{\oplus}$  calcd for  $\text{C}_{21}\text{H}_{32}\text{O}_5\text{SiNa}^{\oplus}$  415.1911, found 415.1907.

### (2*E*,4*Z*)-4-((*tert*-Butyldimethylsilyl)oxy)-7-(1,3-dioxan-2-yl)hepta-2,4-dien-1-yl methyl carbonate (1j)

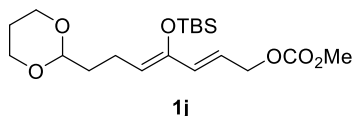

Colorless oil, 0.89 g, 46% yield.  $^1\text{H}$  NMR (400 MHz,  $\text{CDCl}_3$ )  $\delta$  6.09 (d,  $J = 15.4$  Hz, 1H), 5.86 – 5.68 (m, 1H), 4.80 (t,  $J = 7.3$  Hz, 1H), 4.62 (d,  $J = 6.3$  Hz, 2H), 4.45 (t,  $J = 4.9$  Hz, 1H), 4.04 (dd,  $J = 11.1, 4.4$  Hz, 2H), 3.79 – 3.65 (m, 5H), 2.16 (dd,  $J = 14.8, 7.3$  Hz, 2H), 2.10 – 1.96 (m, 1H), 1.59 (dd,  $J = 12.7, 7.1$  Hz, 2H), 1.29 (d,  $J = 13.3$  Hz, 1H), 0.95 (s, 9H), 0.07 (s, 6H);  $^{13}\text{C}$  NMR (101 MHz,  $\text{CDCl}_3$ )  $\delta$  155.59, 147.43, 133.64, 120.76, 116.49, 101.73, 67.95, 66.83, 54.71, 34.79, 25.94, 25.85, 20.71, 18.37, -3.71; HRMS (ESI):  $[\text{M}+\text{Na}]^{\oplus}$  calcd for  $\text{C}_{19}\text{H}_{34}\text{O}_6\text{SiNa}^{\oplus}$  409.2017, found 409.2004.

## 2.3 Synthesis of peptide substrates

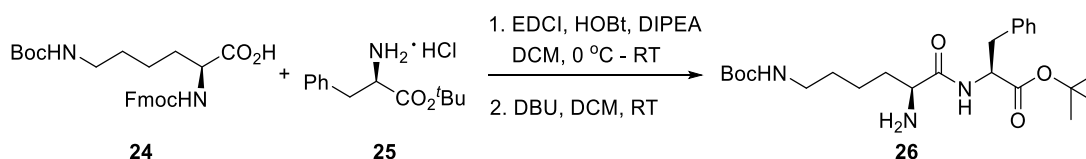

To a well stirred solution of amino ester **25** (2.6 g, 10 mmol) in DCM (50 mL) was added DIPEA (1.8 mL, 11 mmol) dropwise. Then, amino acid **24** (4.7 g, 10 mmol), HOBT (1.5 g, 11 mmol), and EDCI (2.1 g, 11 mmol) were added, and the resulting mixture was stirred at room temperature for 12 h. After this time, the reaction was washed with sat. aqueous  $\text{NaHCO}_3$  (50 mL), citric acid (10 wt% aqueous, 50 mL) and brine (50 mL) in sequence and extracted with DCM (50 mL  $\times$  3). The organic layers were combined and dried with  $\text{NaSO}_4$  and condensed. Then, to the condensed mixture above was added DCM (100 mL) and DBU (3.0 g, 20 mmol). The mixture was stirred at room temperature for 2 h, then condensed, and the residue was purified by flash column chromatography (DCM/MeOH = 50/1 – 20/1) to afford the pure substrate **26** (2.3 g) as white solid in 50% yield.  $^1\text{H}$  NMR (400 MHz,  $\text{CDCl}_3$ )  $\delta$  7.70 (d,  $J = 8.0$  Hz, 1H), 7.30 – 7.15 (m, 5H), 4.75 (dt,  $J = 8.2, 6.5$  Hz, 1H), 4.56 (br s, 1H), 3.33 (dd,  $J = 7.9, 4.5$  Hz, 1H), 3.18 – 2.97 (m, 4H), 1.76 – 1.68 (m, 1H), 1.49 – 1.41 (m, 23H), 1.32 – 1.24 (m, 2H);  $^{13}\text{C}$  NMR (101 MHz,  $\text{CDCl}_3$ )  $\delta$  174.48, 170.80, 156.01, 136.38, 129.42, 128.27, 126.82, 82.05, 78.96, 54.94, 53.01, 40.12, 38.28, 34.54, 29.83, 28.40, 27.92, 22.70; HRMS (ESI):  $[\text{M}+\text{H}]^{\oplus}$  calcd for  $\text{C}_{24}\text{H}_{40}\text{O}_5\text{N}_3^{\oplus}$  450.2962, found 450.2962.

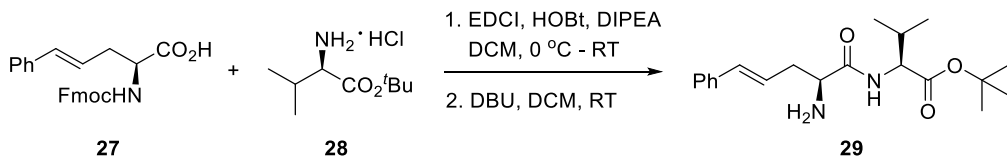

This compound was prepared by a synthetic procedure that was the same as that used to prepare **26**. White solid, 2.1 g, 62% yield.  $^1\text{H}$  NMR (400 MHz,  $\text{CDCl}_3$ )  $\delta$  7.83 (d,  $J = 9.1$  Hz, 1H), 7.41 (d,  $J = 7.3$  Hz, 2H), 7.33 (dd,  $J = 14.2, 6.5$  Hz, 2H), 7.26 (t,  $J = 7.2$  Hz, 1H), 6.53 (d,  $J = 15.8$  Hz, 1H), 6.25 – 6.17 (m, 1H), 4.48 (dd,  $J = 9.2, 4.5$  Hz, 1H), 3.57 (dd,  $J = 8.4, 4.0$  Hz, 1H), 2.87 – 2.74 (m, 1H), 2.52 (dt,  $J = 14.2, 8.2$  Hz, 1H), 2.31 – 2.18 (m, 1H), 1.56 – 1.51 (m, 11H), 0.99 (d,  $J = 6.9$  Hz, 3H), 0.96 (d,  $J = 6.9$  Hz, 3H);  $^{13}\text{C}$  NMR (101 MHz,  $\text{CDCl}_3$ )  $\delta$  174.22, 170.97, 136.96, 133.69, 128.48, 127.34, 126.16, 125.93, 81.64, 57.09, 54.46, 38.76, 31.22, 28.01, 19.02, 17.60; HRMS (ESI):  $[\text{M}+\text{H}]^{\oplus}$  calcd for  $\text{C}_{20}\text{H}_{31}\text{O}_3\text{N}_2^{\oplus}$  347.2329, found 347.2337.

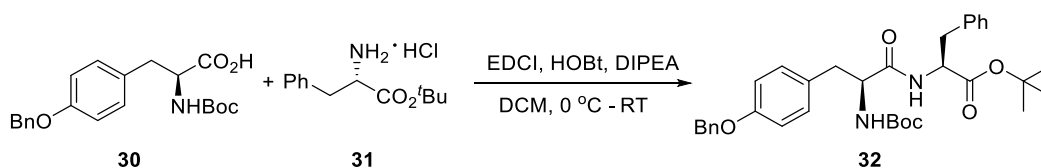

To a well stirred solution of **31** (2.6 g, 10 mmol) in DCM (50 mL) was added DIPEA (1.8 mL, 11 mmol) dropwise. Then, **30** (3.7 g, 10 mmol), HOBT (1.5 g, 11 mmol), and EDCI (2.1 g, 11 mmol) were added, and the resulting mixture was stirred at room temperature for 12 h. After this time, the reaction solution was washed with saturated  $\text{NaHCO}_3$  (aq) (50 mL), citric acid (10 wt% aqueous, 50 mL) and brine (50 mL) in sequence and extracted with DCM (50 mL). The organic layer was dried with  $\text{NaSO}_4$ , and condensed. The residue was purified by flash column chromatography (hexane/ethyl acetate = 6/1 – 4/1) to afford pure **32** (5.3 g) as a white solid in 92% yield.  $^1\text{H}$  NMR (500 MHz,  $\text{CDCl}_3$ )  $\delta$  7.42 – 7.30 (m, 5H), 7.25 – 7.18 (m, 3H), 7.10 (d,  $J = 8.0$  Hz, 2H), 7.05 (d,  $J = 6.7$  Hz, 2H), 6.89 (d,  $J = 8.4$  Hz, 2H), 6.32 (s, 1H), 5.09 – 4.84 (m, 3H), 4.64 (d,  $J = 5.5$  Hz, 1H), 4.31 (d,  $J = 4.9$  Hz, 1H), 3.08 – 2.93 (m, 4H), 1.41 (s, 9H), 1.36 (s, 9H);  $^{13}\text{C}$  NMR (100 MHz,  $\text{CDCl}_3$ )  $\delta$  170.72, 170.02, 157.78, 155.26, 136.96, 136.01, 130.38, 129.50, 128.75, 128.52, 128.27, 127.89, 127.39, 126.87, 114.90, 82.21, 79.97, 69.89, 55.76, 53.65, 38.12, 37.48, 28.23, 27.84; HRMS (ESI):  $[\text{M}+\text{Na}]^{\oplus}$  calcd for  $\text{C}_{34}\text{H}_{42}\text{N}_2\text{O}_6\text{Na}^{\oplus}$  597.2935, found 597.2931.

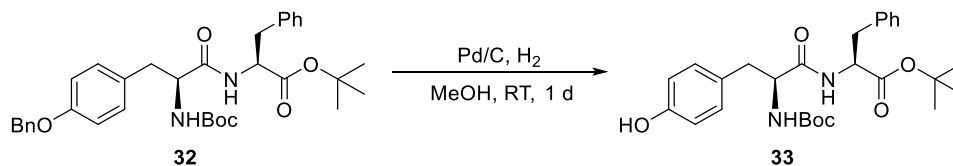

To a well stirred solution of **32** (2.5 g, 4.4 mmol) in MeOH (350 mL) was added Pd/C (5 wt%, 0.93 g, 0.45 mmol). The resulting mixture was stirred under hydrogen atmosphere for one day. The reaction solution was filtered and purified by flash column chromatography (hexane/ethyl acetate = 3/1) to afford the pure substrate **33** (1.7 g) as white solid in 81% yield.  $^1\text{H}$  NMR (500 MHz,  $\text{CDCl}_3$ )  $\delta$  7.26 – 7.20 (m, 3H), 7.06 (d,  $J = 7.0$  Hz, 2H), 7.01 (d,  $J = 5.9$  Hz, 2H), 6.71 (d,  $J = 8.1$  Hz, 2H), 6.35 (br s, 1H), 5.92 (br s, 1H), 4.99 (br s, 1H), 4.64 (br s, 1H), 4.28 (br s, 1H), 3.10 – 2.84 (m, 4H), 1.41 (s, 9H), 1.36 (s, 9H);  $^{13}\text{C}$  NMR (151 MHz,  $\text{CDCl}_3$ )  $\delta$  171.38, 170.08, 155.58, 155.54, 135.87, 130.31, 129.48, 128.32, 127.31, 126.93, 115.68, 82.47, 80.35, 55.93, 53.84, 38.09, 37.44, 28.22, 27.82; HRMS (ESI):  $[\text{M}+\text{Na}]^{\oplus}$  calcd for

C<sub>27</sub>H<sub>36</sub>N<sub>2</sub>O<sub>6</sub>Na<sup>⊕</sup> 507.2466, found 507.2465.

## 2.4 General procedure for the preparation of lithium phenoxides derivatives

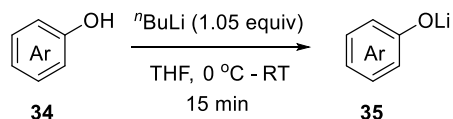

To a well stirred solution of **34** (1.0 equiv) and THF (1.0 M) under N<sub>2</sub> atmosphere at 0 °C was added <sup>n</sup>BuLi (2.5 M in THF, 1.05 equiv) dropwise. The reaction was stirred for 15 min at room temperature. After this time, the reaction solution was condensed and dried to afford phenoxide product **35**.

## 2.5 General procedure for the preparation of sodium arylthiolate derivatives

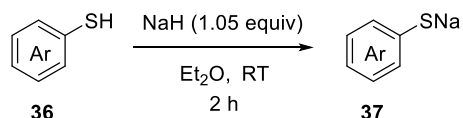

To a well stirred solution of NaH (60% oil dispersion, 1.05 equiv) and Et<sub>2</sub>O (0.25 M) under N<sub>2</sub> atmosphere at room temperature was added **36** (1.0 equiv) dropwise. The reaction was stirred for 2 h at room temperature. After this time, the reaction solution was filtered, washed by Et<sub>2</sub>O for three times. The solid was collected and dried to afford thiolate product **37**.

## 3. Initial trials

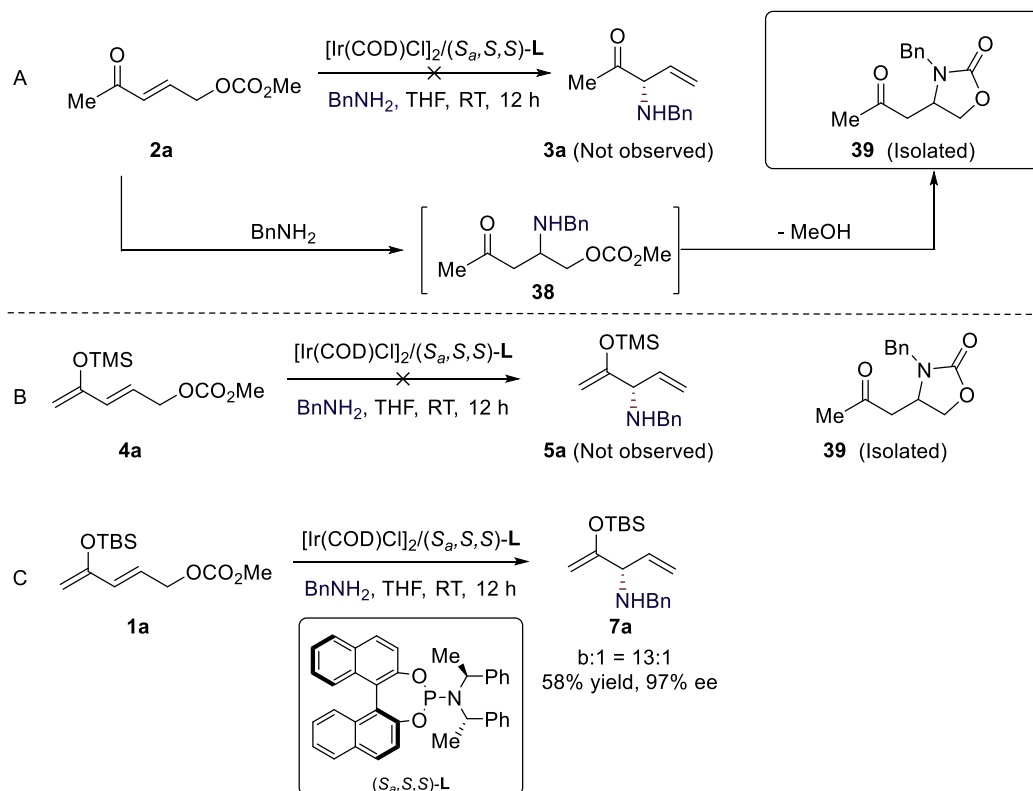

These three reactions were conducted following the same procedure as that in “Development of the process for the construction of C-N bonds,” except that different electrophiles were used. The reaction

was stirred at room temperature for 12 h. The crude reaction solution was condensed to obtain a  $^1\text{H}$  NMR spectrum (with  $\text{CH}_2\text{Br}_2$  as internal standard). For reaction A, we observed intermediate **38** (19% yield) and compound **39** (44% yield); For reaction B, we observed intermediate **38** (33% yield) and compound **39** (29% yield). Compound **38** was identified by  $^1\text{H}$  NMR spectroscopy. Compound **38** converted to compound **39** at room temperature in the glovebox.

## 2-(Benzylamino)-4-oxopentyl methyl carbonate (**38**)

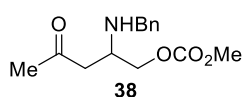

Yellow oil.  $^1\text{H}$  NMR (400 MHz,  $\text{CDCl}_3$ )  $\delta$  7.39 – 7.25 (m, 5H), 4.23 (qd,  $J$  = 10.9, 4.8 Hz, 2H), 3.92 – 3.77 (m, 5H), 3.42 – 3.31 (m, 1H), 2.69 (dd,  $J$  = 6.2, 2.3 Hz, 2H), 2.17 (s, 3H).

## 1-(1-Benzylaziridin-2-yl)propan-2-one (**39**)

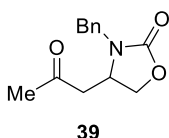

Yellow oil.  $^1\text{H}$  NMR (400 MHz,  $\text{CDCl}_3$ )  $\delta$  7.37 – 7.23 (m, 5H), 4.61 (d,  $J$  = 15.4 Hz, 1H), 4.53 (t,  $J$  = 8.8 Hz, 1H), 4.21 (d,  $J$  = 15.4 Hz, 1H), 4.09 – 3.98 (m, 1H), 3.87 (dd,  $J$  = 9.1, 6.4 Hz, 1H), 2.90 (dd,  $J$  = 18.2, 4.1 Hz, 1H), 2.54 (dd,  $J$  = 18.2, 9.2 Hz, 1H), 2.04 (s, 3H);  $^{13}\text{C}$  NMR (151 MHz,  $\text{CDCl}_3$ )  $\delta$  205.31, 158.39, 135.98, 128.95, 128.07, 127.91, 68.19, 50.88, 46.65, 46.41, 30.24; HRMS (ESI):  $[\text{M}+\text{Na}]^{\oplus}$  calcd for  $\text{C}_{13}\text{H}_{15}\text{NO}_3\text{Na}^{\oplus}$  256.0944, found 256.0945.

## 4. Development of the process for the construction of C-N bonds<sup>a</sup>

General procedure: To a 4 mL vial containing a magnetic stir bar were added  $[\text{Ir}(\text{COD})\text{Cl}]_2$  (2.6 mg, 0.0040 mmol), (*S<sub>a</sub>,S,S*)-L (4.4 mg, 0.0080 mmol) and THF (0.2 mL) in a nitrogen-filled glovebox, and the resulting mixture was stirred at RT for 10 min. Then, *n*-propylamine (0.1 mL) was added to the vial. The vial was sealed with a PTFE lined cap and stirred at 50 °C for 20 min. Next, the volatile materials were evaporated under vacuum. Compound **1a** (54 mg, 0.20 mmol) in THF (0.25 M to 1.0 M) was added, and the reaction was stirred at RT for 10 min. After this time, benzylamine (54 mg, 0.50 mmol) was added to the reaction, and the vial sealed with a PTFE lined cap was removed from the glovebox and stirred at the stated temperature for 12 h. The crude reaction solution was condensed to obtain a  $^1\text{H}$  NMR spectrum (with  $\text{CH}_2\text{Br}_2$  as internal standard). For isolation, the reaction was further purified by flash column chromatography using hexane/ethyl acetate as eluent to afford pure **7a**.

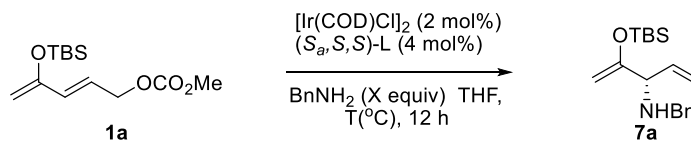

| Entry | X   | Concentration | T/ °C | b:l  | Yield (%)     | ee (%)         |
|-------|-----|---------------|-------|------|---------------|----------------|
| 1     | 1.2 | 0.25 M        | RT    | 13:1 | 58            | /              |
| 2     | 2.0 | 0.25 M        | RT    | 13:1 | 68            | /              |
| 3     | 2.5 | 0.25 M        | RT    | 13:1 | 72            | /              |
| 4     | 3.0 | 0.25 M        | RT    | 13:1 | 58            | /              |
| 5     | 1.2 | 0.25 M        | 35    | 12:1 | 72            | /              |
| 6     | 1.2 | 0.25 M        | 50    | 10:1 | 55            | /              |
| 7     | 2.5 | 1.0 M         | 40    | 12:1 | 82 (isolated) | 99( <i>S</i> ) |

<sup>a</sup>B:l ratios and yields were determined by crude  $^1\text{H}$  NMR with  $\text{CH}_2\text{Br}_2$  as internal standard. Ee value was determined by chiral HPLC.

## 5. Determination of absolute configuration of **7a**

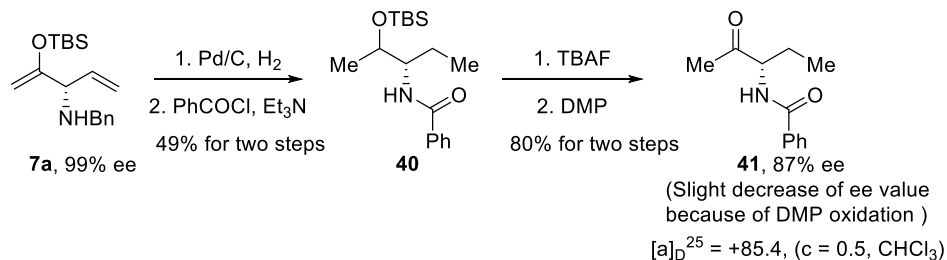

Synthesis of intermediate **40**: To a well stirred solution of **7a** (91 mg, 0.30 mmol) in MeOH (4.0 mL) was added Pd/C (5 wt%, 64 mg, 0.030 mmol of Pd). The resulting mixture was stirred under hydrogen atmosphere for 12 h. Then, it was filtered through Celite, condensed and dissolved in DCM (15 mL) under nitrogen at  $-78^\circ\text{C}$ . Triethylamine (61 mg, 0.60 mmol) was added to the solution. Next, benzoyl chloride (63 mg, 0.45 mmol) was added dropwise. The reaction was allowed to warm to room temperature and was stirred for another 6 h. After this time, it was quenched with sat. aqueous  $\text{NaHCO}_3$  (15 mL) and extracted by DCM (15 mL  $\times$  3). The organic layer was dried with  $\text{NaSO}_4$ , condensed and purified by flash column chromatography (hexane/ethyl acetate = 10/1) to afford **40** (47.0 mg) as a mixture of diastereomers (ratio = 1.5:1) as a colorless oil in 49% yield. As the isomers could not be isolated from each other and it is also unnecessary to isolate them from each other, the given data here is for the mixture of these two isomers:  $^1\text{H NMR}$  (400 MHz,  $\text{CDCl}_3$ )  $\delta$  7.77 (br s, 2H, corresponding to 2 Ar-H), 7.51 – 7.34 (m, 3H, corresponding to 3 Ar-H), 6.44 – 6.16 (m, 1H, corresponding to N-H), 4.12 – 3.81 (m, 2H, corresponding to O-CH & N-CH), 1.78 – 1.49 (m, 2H, corresponding to  $-\text{CH}_2-$ ), 1.20 – 1.16 (m, 3H, corresponding to  $-\text{CH}_3$ ), 0.99 – 0.86 (m, 12H, corresponding to Si<sup>t</sup>Bu &  $-\text{CH}_3$ ), 0.11 –  $-0.03$  (m, 6H, corresponding to  $\text{Si}(\text{CH}_3)_2$ );  $^{13}\text{C NMR}$  (101 MHz,  $\text{CDCl}_3$ )  $\delta$  167.28, 167.04, 135.09, 134.99, 131.38, 131.36, 128.68, 128.64, 126.84, 126.80, 70.62, 69.05, 56.37, 56.23, 26.40, 25.97, 25.88, 21.59, 21.03, 20.62, 18.08, 18.05, 10.87, 10.75,  $-4.07$ ,  $-4.11$ ,  $-4.82$  (two peaks were overlapped,  $\text{CH}_3$ ) (The amount of carbon signals is doubled because of two isomers); HRMS (ESI):  $[\text{M}+\text{Na}]^{\oplus}$  calcd for  $\text{C}_{18}\text{H}_{31}\text{NSiO}_2\text{Na}^{\oplus}$  344.2016, found 344.2017.

Synthesis of known product **41**: To a well stirred solution of **40** (13 mg, 0.040 mmol) in THF (0.5 mL) was added TBAF (1 M in THF, 0.1 mL). The resulting solution was stirred at room temperature for 5 h. After this time, the reaction was quenched by sat. aqueous  $\text{H}_2\text{O}$  (5 mL) and extracted by DCM (5 mL  $\times$  3). The organic layer was dried with  $\text{NaSO}_4$  and condensed. To the residue above in dry DCM (1.5 mL) was added DMP (26 mg, 0.060 mmol) in three portions at  $0^\circ\text{C}$ . The reaction solution was allowed to warm to room temperature and was stirred for 1.5 h. After this time, the reaction was quenched with sat. aqueous  $\text{NaHCO}_3$  (15 mL), sat. aqueous  $\text{Na}_2\text{S}_2\text{O}_3$  (15 mL) and extracted with DCM (15 mL  $\times$  3). The organic layer was dried with  $\text{NaSO}_4$ , condensed and purified by flash column chromatography (hexane/ethyl acetate = 3/1 – 2/1) to afford **41** (6.6 mg) as a yellow oil in 80% yield.  $[\alpha]_{\text{D}}^{25} +85.4$  ( $c$  0.50,  $\text{CHCl}_3$ ) for 87% ee;  $^1\text{H NMR}$  (400 MHz,  $\text{CDCl}_3$ )  $\delta$  7.82 (d,  $J = 7.3$  Hz, 2H), 7.52 (t,  $J = 7.2$  Hz, 1H), 7.45 (t,  $J = 7.4$  Hz, 2H), 6.98 (br s, 1H), 4.86 (dd,  $J = 11.6, 6.0$  Hz, 1H), 2.28 (s, 3H), 2.21 – 2.13 (m, 1H), 1.86 – 1.75 (m, 1H), 0.91 (t,  $J = 7.4$  Hz, 3H);  $^{13}\text{C NMR}$  (101 MHz,  $\text{CDCl}_3$ )  $\delta$  206.75, 167.07, 134.21, 131.81, 128.71, 127.13, 59.99, 27.26, 24.51, 8.94; HRMS (ESI):  $[\text{M}+\text{Na}]^{\oplus}$  calcd for  $\text{C}_{12}\text{H}_{15}\text{NO}_2\text{Na}^{\oplus}$  228.0995, found 228.0993; HPLC: chiral OD-H Column; detected at 220 nm;  $n$ -hexane/ $i$ -propanol = 95/5; flow = 1.0 mL/min; Retention time: 22.4 min (minor), 24.4 min (major).

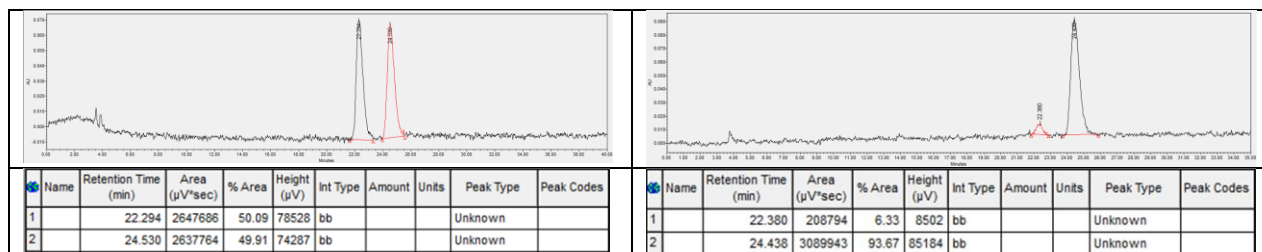

By comparing the rotation data and HPLC data with the previous reported (*R*)-**41**<sup>2</sup>, the compound **41** in our report is determined to be *S*.

## 6. Scope of substrates

### 6.1 Scope for the construction of an alpha C-N bond

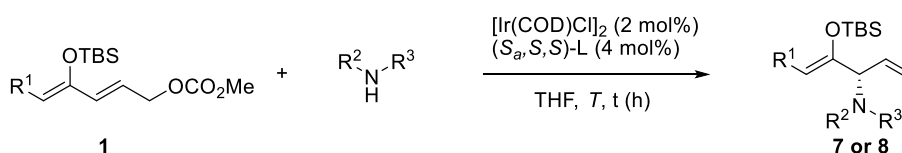

General procedure: To a 4 mL vial containing a magnetic stir bar were added [Ir(COD)Cl]<sub>2</sub> (2.6 mg, 0.0040 mmol), (*S<sub>a</sub>,S,S*)-L (4.4 mg, 0.0080 mmol) and THF (0.2 mL) in a nitrogen-filled glovebox. The resulting mixture was stirred at RT for 10 min. Then, *n*-propylamine (0.1 mL) was added to the reaction. The vial was sealed with a PTFE-lined cap and stirred at 50 °C for 20 min. Next, the volatile materials were evaporated under vacuum. Compound **1** (0.20 mmol) in THF (0.2 mL) was added, and the reaction was stirred at RT for 10 min. Then, the amine (0.50 mmol) was added to the reaction. The vial was sealed with a PTFE-lined cap and was removed from the glovebox and stirred at the stated temperature for the stated time. After this time, the crude reaction solution was condensed to obtain a <sup>1</sup>H NMR spectrum (with CH<sub>2</sub>Br<sub>2</sub> as internal standard). The product was further purified by flash column chromatography using hexane/ethyl acetate as eluent to afford pure product.

#### (*S*)-*N*-Benzyl-2-((*tert*-butyldimethylsilyloxy)penta-1,4-dien-3-amine (**7a**)

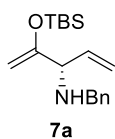

The reaction was run at 40 °C for 12 h. B:l = 12:1, yellow oil, 50 mg, 82% yield. [ $\alpha$ ]<sub>D</sub><sup>25</sup> +5.3 (*c* 1.90, CHCl<sub>3</sub>) for 99% ee; <sup>1</sup>H NMR (400 MHz, CDCl<sub>3</sub>)  $\delta$  7.36 – 7.21 (m, 5H), 5.81 (ddd, *J* = 17.1, 10.3, 6.7 Hz, 1H), 5.24 (dt, *J* = 17.3, 1.4 Hz, 1H), 5.18 – 5.11 (m, 1H), 4.25 (d, *J* = 1.2 Hz, 1H), 4.18 (d, *J* = 1.3 Hz, 1H), 3.79 – 3.70 (m, 2H), 3.53 (d, *J* = 6.7 Hz, 1H), 1.66 (s, 1H, might be NH), 0.92 (s, 9H), 0.20 (s, 3H), 0.19 (s, 3H); <sup>13</sup>C NMR (151 MHz, CDCl<sub>3</sub>)  $\delta$  158.00, 140.56, 138.47, 128.38, 128.32, 126.88, 116.26, 90.38, 64.85, 51.02, 25.77, 18.18, -4.64, -4.69; HRMS (ESI): [M+H]<sup>+</sup> calcd for C<sub>18</sub>H<sub>30</sub>NOSi<sup>+</sup> 304.2091, found 304.2105; HPLC: chiral AD-H column; detected at 220 nm; *n*-hexane/*i*-propanol = 99.5/0.5; flow = 0.6 mL/min; Retention time: 7.9 min (minor), 8.8 min (major).

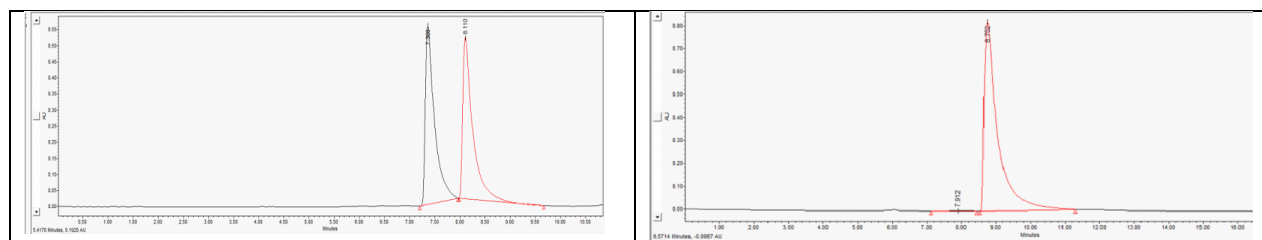



| Name | Retention Time (min) | Area ( $\mu\text{V}\cdot\text{sec}$ ) | % Area | Height ( $\mu\text{V}$ ) | Int Type | Amount | Units | Peak Type | Peak Codes |
|------|----------------------|---------------------------------------|--------|--------------------------|----------|--------|-------|-----------|------------|
| 1    | 7.368                | 7104742                               | 50.36  | 556100                   | bb       |        |       | Unknown   |            |
| 2    | 8.110                | 7001771                               | 49.64  | 508583                   | bb       |        |       | Unknown   |            |

| Name | Retention Time (min) | Area ( $\mu\text{V}\cdot\text{sec}$ ) | % Area | Height ( $\mu\text{V}$ ) | Int Type | Amount | Units | Peak Type | Peak Codes |
|------|----------------------|---------------------------------------|--------|--------------------------|----------|--------|-------|-----------|------------|
| 1    | 7.912                | 46088                                 | 0.21   | 1457                     | bb       |        |       | Unknown   |            |
| 2    | 8.752                | 22388086                              | 99.79  | 823945                   | bb       |        |       | Unknown   |            |

**(*S,Z*)-*N*-Benzyl-4-((*tert*-butyldimethylsilyl)oxy)nona-1,4-dien-3-amine (7b)**

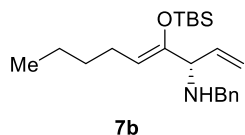

The reaction was run at 55 °C for 15 h. B:l = 17:1, colorless oil, 65 mg, 90% yield.  $[\alpha]_D^{25}$  -4.2 (*c* 3.93,  $\text{CHCl}_3$ ) for 94% ee;  $^1\text{H}$  NMR (400 MHz,  $\text{CDCl}_3$ )  $\delta$  7.35 – 7.21 (m, 5H), 5.81 (ddd,  $J = 17.2, 10.2, 7.0$  Hz, 1H), 5.26 – 5.20 (m, 1H), 5.20 – 5.15 (m, 1H), 4.74 (t,  $J = 7.1$  Hz, 1H), 3.83 – 3.66 (m, 2H), 3.51 (d,  $J = 7.0$  Hz, 1H), 2.05 (q,  $J = 7.0$  Hz, 2H), 1.37 – 1.27 (m, 4H), 0.96 – 0.85 (m, 12H), 0.11 (s, 3H), 0.10 (s, 3H);  $^{13}\text{C}$  NMR (151 MHz,  $\text{CDCl}_3$ )  $\delta$  149.68, 140.59, 138.92, 128.40, 128.33, 126.91, 116.37, 109.40, 65.12, 51.36, 32.10, 26.01, 25.14, 22.60, 18.50, 14.09, -3.66, -3.75; HRMS (ESI):  $[\text{M}+\text{H}]^{\oplus}$  calcd for  $\text{C}_{22}\text{H}_{38}\text{NOSi}^{\oplus}$  360.2717, found 360.2717; HPLC: chiral OD-H column; detected at 220 nm; *n*-hexane/*i*-propanol = 100/0; flow = 1.0 mL/min; Retention time: 5.7 min (minor), 10.3 min (major).

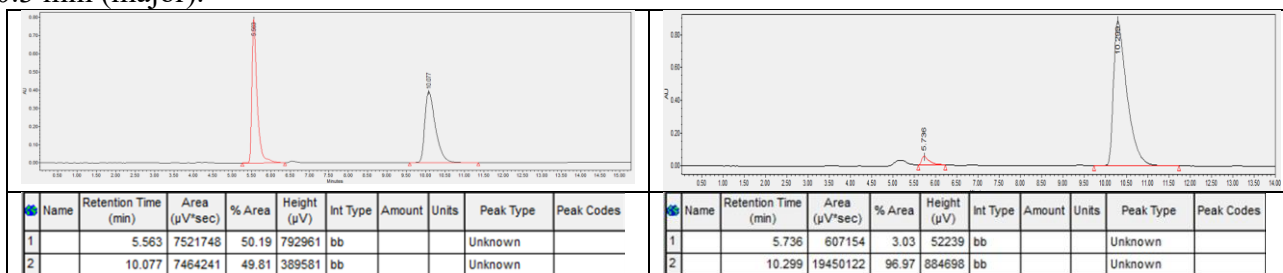

**(*S,Z*)-*N*-Benzyl-4-((*tert*-butyldimethylsilyl)oxy)-8-methylnona-1,4-dien-3-amine (7c)**

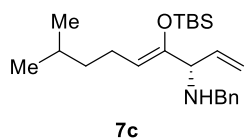

The reaction was run at 50 °C for 15 h. B:l = 18:1, yellow oil, 72 mg, 96% yield.  $[\alpha]_D^{25}$  -4.3 (*c* 3.12,  $\text{CHCl}_3$ ) for 96% ee;  $^1\text{H}$  NMR (400 MHz,  $\text{CDCl}_3$ )  $\delta$  7.35 – 7.21 (m, 5H), 5.80 (ddd,  $J = 17.2, 10.2, 7.0$  Hz, 1H), 5.27 – 5.20 (m, 1H), 5.20 – 5.15 (m, 1H), 4.72 (t,  $J = 7.0$  Hz, 1H), 3.80 – 3.67 (m, 2H), 3.50 (d,  $J = 7.0$  Hz, 1H), 2.05 (dd,  $J = 15.6, 7.4$  Hz, 2H), 1.61 – 1.51 (m, 2H), 1.27 – 1.17 (m, 2H), 0.94 (s, 9H), 0.88 (d,  $J = 6.6$  Hz, 6H), 0.11 (s, 3H), 0.10 (s, 3H);  $^{13}\text{C}$  NMR (151 MHz,  $\text{CDCl}_3$ )  $\delta$  149.56, 140.60, 138.91, 128.41, 128.33, 126.91, 116.39, 109.56, 65.10, 51.36, 39.07, 27.98, 26.01, 23.41, 22.66, 22.62, 18.50, -3.65, -3.74; HRMS (ESI):  $[\text{M}+\text{H}]^{\oplus}$  calcd for  $\text{C}_{23}\text{H}_{40}\text{NOSi}^{\oplus}$  374.2874, found 374.2886; HPLC: chiral OD-H column; detected at 220 nm; *n*-hexane/*i*-propanol = 100/0; flow = 1.0 mL/min; Retention time: 5.5 min (minor), 9.5 min (major).

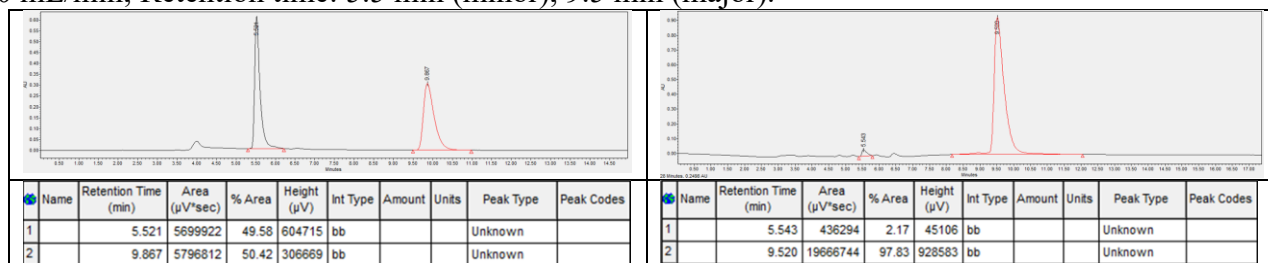

**(*S,Z*)-*N*-Benzyl-4-((*tert*-butyldimethylsilyl)oxy)-7-cyclohexylhepta-1,4-dien-3-amine (7d)**

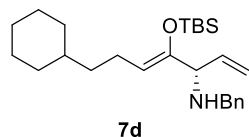

The reaction was run at 50 °C for 15 h. B:l = 17:1, yellow oil, 79 mg, 96% yield.  $[\alpha]_D^{25}$  -2.9 (*c* 4.44, CHCl<sub>3</sub>) for 96% ee; <sup>1</sup>H NMR (400 MHz, CDCl<sub>3</sub>) δ 7.36 – 7.21 (m, 5H), 5.80 (ddd, *J* = 17.2, 10.2, 7.0 Hz, 1H), 5.23 (d, *J* = 17.2 Hz, 1H), 5.18 (d, *J* = 10.2 Hz, 1H), 4.72 (t, *J* = 7.0 Hz, 1H), 3.82 – 3.66 (m, 2H), 3.50 (d, *J* = 7.0 Hz, 1H), 2.05 (dd, *J* = 14.9, 7.2 Hz, 2H), 1.76 – 1.59 (m, 5H), 1.27 – 1.08 (m, 6H), 0.98 – 0.83 (m, 11H), 0.11 (s, 3H), 0.10 (s, 3H); <sup>13</sup>C NMR (151 MHz, CDCl<sub>3</sub>) δ 149.48, 140.60, 138.92, 128.40, 128.33, 126.90, 116.35, 109.68, 65.10, 51.34, 37.61, 33.42, 33.36, 26.80, 26.50, 26.02, 22.86, 18.50, -3.64, -3.72; HRMS (ESI): [M+H]<sup>+</sup> calcd for C<sub>26</sub>H<sub>44</sub>NOSi<sup>+</sup> 414.3187, found 414.3209; HPLC: chiral OD-H column; detected at 220 nm; *n*-hexane/*i*-propanol = 100/0; flow = 1.0 mL/min; Retention time: 5.9 min (minor), 9.9 min (major).

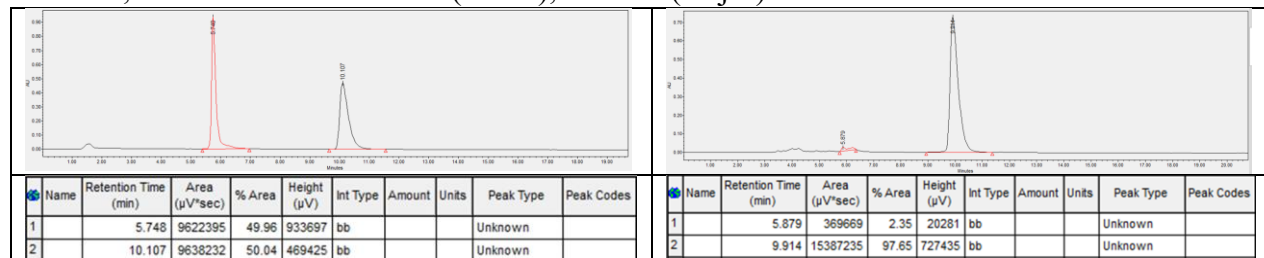

### (*S,Z*)-*N*-Benzyl-4-((*tert*-butyldimethylsilyloxy)-7-phenylhepta-1,4-dien-3-amine (7e)

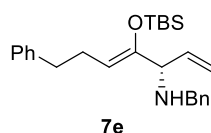

The reaction was run at 50 °C for 12 h. B:l = 14:1, yellow oil, 59 mg, 73% yield.  $[\alpha]_D^{25}$  -2.2 (*c* 1.03, CHCl<sub>3</sub>) for 95% ee; <sup>1</sup>H NMR (400 MHz, CDCl<sub>3</sub>) δ 7.36 – 7.20 (m, 10H), 5.85 (ddd, *J* = 17.2, 10.2, 7.0 Hz, 1H), 5.269 – 5.22 (m, 2H), 4.87 (t, *J* = 7.1 Hz, 1H), 3.81 – 3.72 (m, 2H), 3.56 (d, *J* = 7.0 Hz, 1H), 2.74 – 2.67 (m, 2H), 2.42 (dd, *J* = 15.4, 7.3 Hz, 2H), 0.97 (s, 9H), 0.14 (s, 3H), 0.13 (s, 3H); <sup>13</sup>C NMR (101 MHz, CDCl<sub>3</sub>) δ 150.28, 142.25, 140.47, 138.73, 128.49, 128.39, 128.31, 128.30, 126.91, 125.75, 116.46, 108.31, 64.99, 51.28, 36.09, 27.14, 26.00, 18.47, -3.62, -3.71; HRMS (ESI): [M+H]<sup>+</sup> calcd for C<sub>26</sub>H<sub>38</sub>NOSi<sup>+</sup> 408.2717, found 408.2711; HPLC: chiral AD-H column; detected at 220 nm; *n*-hexane/*i*-propanol = 99.9/0.1; flow = 1.0 mL/min; Retention time: 9.0 min (minor), 12.6 min (major).

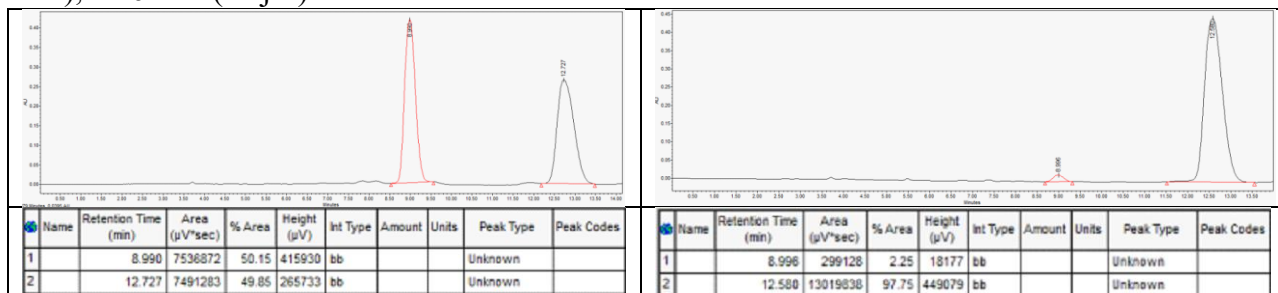

### (*S,Z*)-*N*-Benzyl-4-((*tert*-butyldimethylsilyloxy)nona-1,4,8-trien-3-amine (7f)

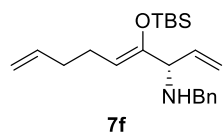

The reaction was run at 55 °C for 15 h. B:l = 15:1, yellow oil, 62 mg, 87% yield.  $[\alpha]_D^{25}$  -2.7 (*c* 3.94, CHCl<sub>3</sub>) for 94% ee; <sup>1</sup>H NMR (400 MHz, CDCl<sub>3</sub>) δ 7.36 – 7.21 (m, 5H), 5.90 – 5.71 (m, 2H), 5.23 (dd, *J* = 17.2, 1.2 Hz, 1H), 5.18 (d, *J* = 10.2 Hz, 1H), 5.07 – 4.98 (m, 1H), 4.98 – 4.92 (m, 1H), 4.77 (t, *J* = 6.7 Hz, 1H), 3.81 – 3.68 (m, 2H), 3.51 (d, *J* = 7.0 Hz, 1H), 2.24 – 2.01 (m, 4H), 0.94 (s, 9H), 0.12 (s, 3H), 0.10 (s, 3H); <sup>13</sup>C NMR (151 MHz, CDCl<sub>3</sub>) δ 150.17, 140.55, 138.81, 138.63, 128.41, 128.32, 126.92, 116.46, 114.58, 108.39, 65.05, 51.33, 33.96,

26.00, 24.78, 18.49, -3.63, -3.71; HRMS (ESI):  $[M+H]^+$  calcd for  $C_{22}H_{36}NOSi^{\oplus}$  358.2561, found 358.2561; HPLC: chiral OD-H column; detected at 220 nm; *n*-hexane/*i*-propanol = 100/0; flow = 1.0 mL/min; Retention time: 6.2 min (minor), 11.3 min (major).

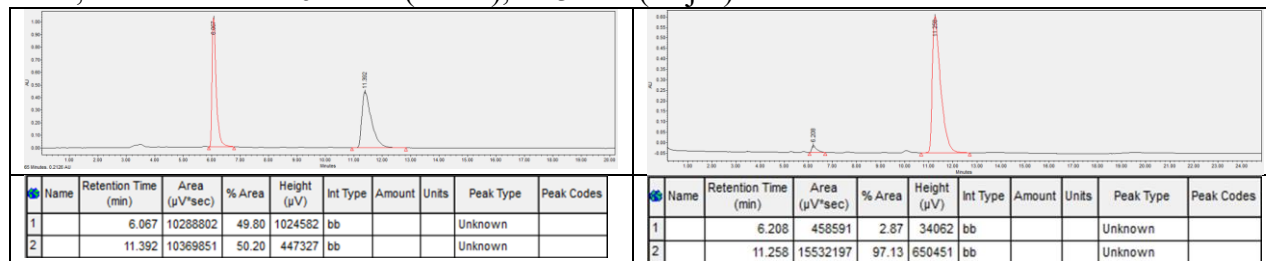

### (*S,Z*)-*N*-Benzyl-4-((*tert*-butyldimethylsilyl)oxy)-9-fluoronona-1,4-dien-3-amine (7g)

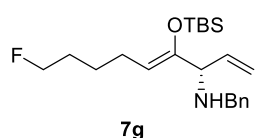

The reaction was run at 55 °C for 18 h. B:l = 16:1, yellow oil, 60 mg, 79% yield.  $[\alpha]_D^{25}$  -4.4 (*c* 3.07,  $CHCl_3$ ) for 95% ee;  $^1H$  NMR (400 MHz,  $CDCl_3$ )  $\delta$  7.35 – 7.20 (m, 5H), 5.79 (ddd,  $J$  = 17.2, 10.2, 7.0 Hz, 1H), 5.25 – 5.17 (m, 2H), 4.75 (t,  $J$  = 7.1 Hz, 1H), 4.49 (t,  $J$  = 6.2 Hz, 1H), 4.38 (t,  $J$  = 6.2 Hz, 1H), 3.78 – 3.69 (m, 2H), 3.51 (d,  $J$  = 7.0 Hz, 1H), 2.09 (q,  $J$  = 7.3 Hz, 2H), 1.77 – 1.64 (m, 2H), 1.49 – 1.41 (m, 2H), 0.93 (s, 9H), 0.11 (s, 3H), 0.10 (s, 3H);  $^{13}C$  NMR (151 MHz,  $CDCl_3$ )  $\delta$  150.42, 140.50, 138.79, 128.43, 128.31, 126.96, 116.54, 108.51, 84.11 (d,  $J_{CF}$  = 164.5 Hz), 65.04, 51.38, 30.18 (d,  $J_{CF}$  = 19.4 Hz), 25.98, 25.39 (d,  $J_{CF}$  = 5.3 Hz), 24.89, 18.49, -3.65, -3.74;  $^{19}F$  NMR (376 MHz,  $CDCl_3$ )  $\delta$  -215.33 – -219.20 (m, 1F); HRMS (ESI):  $[M+H]^+$  calcd for  $C_{22}H_{37}FNOSi^{\oplus}$  378.2623, found 378.2626; HPLC: chiral OD-H column; detected at 220 nm; *n*-hexane/*i*-propanol = 100/0; flow = 1.0 mL/min; Retention time: 9.8 min (minor), 17.3 min (major).

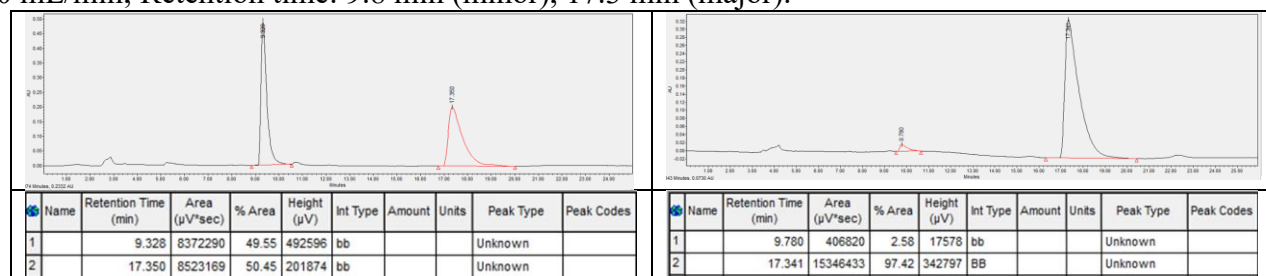

### (*S,Z*)-*N*-Benzyl-4-((*tert*-butyldimethylsilyl)oxy)-8,8,9,9,10,10,10-heptafluorodeca-1,4-dien-3-amine (7h)

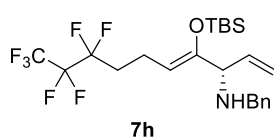

The reaction was run at 55 °C for 24 h. B:l = 15:1, yellow oil, 74 mg, 74% yield.  $[\alpha]_D^{25}$  -1.9 (*c* 3.07,  $CHCl_3$ ) for 94% ee;  $^1H$  NMR (600 MHz,  $CDCl_3$ )  $\delta$  7.34 – 7.23 (m, 5H), 5.77 (ddd,  $J$  = 17.3, 10.2, 7.1 Hz, 1H), 5.25 – 5.20 (m, 2H), 4.77 (t,  $J$  = 7.1 Hz, 1H), 3.73 (dd,  $J$  = 35.7, 13.0 Hz, 2H), 3.52 (d,  $J$  = 7.1 Hz, 1H), 2.40 – 2.30 (m, 2H), 2.14 – 2.01 (m, 2H), 0.93 (s, 9H), 0.11 (s, 3H), 0.10 (s, 3H);  $^{13}C$  NMR (150 MHz,  $CDCl_3$ )  $\delta$  152.22, 140.34, 138.39, 128.49, 128.30, 127.06, 116.98, 105.49, 64.84, 51.44, 30.80 (t,  $J$  = 22.6 Hz), 25.85, 18.43, 16.41, -3.72, -3.80 (three carbon signals from  $C_3F_7$  unit did not appear);  $^{19}F$  NMR (376 MHz,  $CDCl_3$ )  $\delta$  -79.80 (t,  $J$  = 9.5 Hz, 3F), -114.83 – -114.94 (m, 2F), -127.12 (s, 2F); HRMS (ESI):  $[M+H]^+$  calcd for  $C_{23}H_{33}F_7NOSi^{\oplus}$  500.2214, found 500.2222; HPLC: chiral OD-H column (250 mm); detected at 220 nm; *n*-hexane/*i*-propanol = 100/0; flow = 1.0 mL/min; Retention time: 6.4 min (minor), 10.5 min (major).

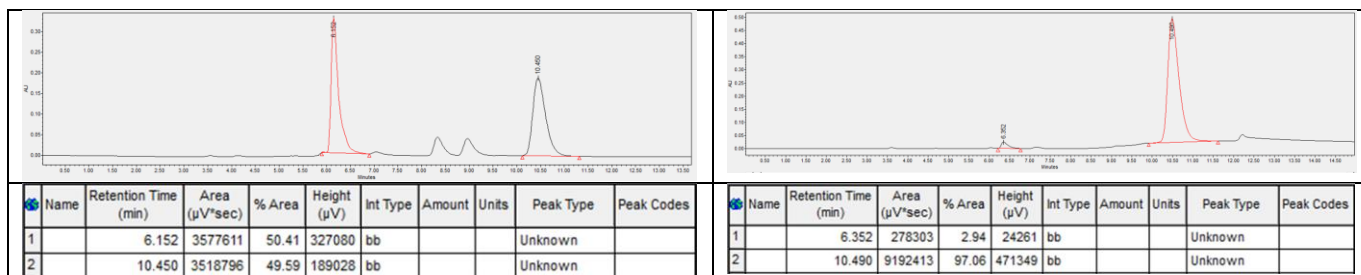

**(*S,Z*)-*N*-Benzyl-4-((*tert*-butyldimethylsilyl)oxy)-7-phenoxyhepta-1,4-dien-3-amine (7i)**

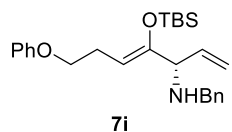

The reaction was run at 55 °C for 16 h. B:l = 10:1, yellow oil, 65 mg, 77% yield.  $[\alpha]_D^{25}$  -4.7 (*c* 2.86, CHCl<sub>3</sub>) for 95% ee; <sup>1</sup>H NMR (400 MHz, CDCl<sub>3</sub>) δ 7.43 – 7.25 (m, 7H), 7.02 – 6.92 (m, 3H), 5.86 (ddd, *J* = 17.2, 10.2, 7.1 Hz, 1H), 5.40 – 5.19 (m, 2H), 4.95 (t, *J* = 7.0 Hz, 1H), 3.99 (t, *J* = 6.9 Hz, 2H), 3.80 (dd, *J* = 21.6 Hz, 12.8 Hz, 2H), 3.60 (d, *J* = 7.0 Hz, 1H), 2.61 (q, *J* = 6.9

Hz, 2H), 1.00 (s, 9H), 0.19 (s, 3H), 0.18 (s, 3H); <sup>13</sup>C NMR (151 MHz, CDCl<sub>3</sub>) δ 159.13, 152.02, 140.44, 138.57, 129.46, 128.44, 128.34, 126.98, 120.59, 116.78, 114.67, 104.33, 67.54, 65.02, 51.38, 25.98, 25.76, 18.49, -3.59, -3.69; HRMS (ESI): [M+H]<sup>+</sup> calcd for C<sub>26</sub>H<sub>38</sub>NO<sub>2</sub>Si<sup>+</sup> 424.2666, found 424.2667; The enantiomeric excess was determined by SFC analysis: chiral OD-H column; detected at 220 nm, 40 °C; *n*-hexane/*i*-propanol = 90/10; flow = 2.5 mL/min; Retention time: 3.4 min (major), 4.4 min (minor).

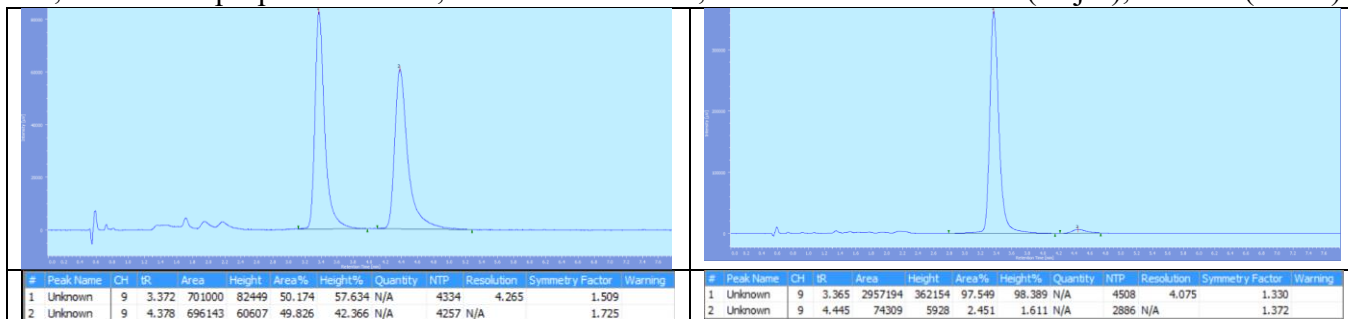

**(*S,Z*)-*N*-Benzyl-4-((*tert*-butyldimethylsilyl)oxy)-7-(1,3-dioxan-2-yl)hepta-1,4-dien-3-amine (7j)**

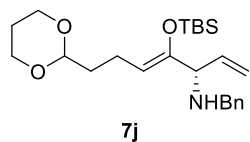

The reaction was run at 55 °C for 22 h. B:l = 19:1, colorless oil, 75 mg, 90% yield.  $[\alpha]_D^{25}$  -1.7 (*c* 4.47, CHCl<sub>3</sub>) for 95% ee; <sup>1</sup>H NMR (400 MHz, CDCl<sub>3</sub>) δ 7.38 – 7.18 (m, 5H), 5.80 (ddd, *J* = 17.2, 10.2, 6.9 Hz, 1H), 5.22 (d, *J* = 17.3 Hz, 1H), 5.17 (d, *J* = 10.3 Hz, 1H), 4.74 (t, *J* = 7.1 Hz, 1H), 4.50 (t, *J* = 5.2 Hz, 1H), 4.08 (dd, *J* = 10.8, 4.9 Hz, 2H), 3.79 – 3.66 (m, 4H), 3.50 (d, *J* = 6.9 Hz, 1H), 2.20 – 2.00 (m, 3H), 1.65 – 1.60 (m, 2H), 1.32 (d, *J* = 13.4 Hz, 1H),

0.93 (s, 9H), 0.12 (s, 3H), 0.10 (s, 3H); <sup>13</sup>C NMR (151 MHz, CDCl<sub>3</sub>) δ 150.24, 140.55, 138.82, 128.42, 128.32, 126.93, 116.42, 108.28, 102.03, 66.93, 65.04, 51.32, 35.33, 26.01, 25.96, 20.04, 18.50, -3.67, -3.74; HRMS (ESI): [M+H]<sup>+</sup> calcd for C<sub>24</sub>H<sub>40</sub>NO<sub>3</sub>Si<sup>+</sup> 418.2772, found 418.2784; The enantiomeric excess was determined by SFC analysis: chiral OD-H column; detected at 220 nm, 40 °C; *n*-hexane/*i*-propanol = 92/8; flow = 2.5 mL/min; Retention time: 2.1 min (minor), 2.4 min (major).

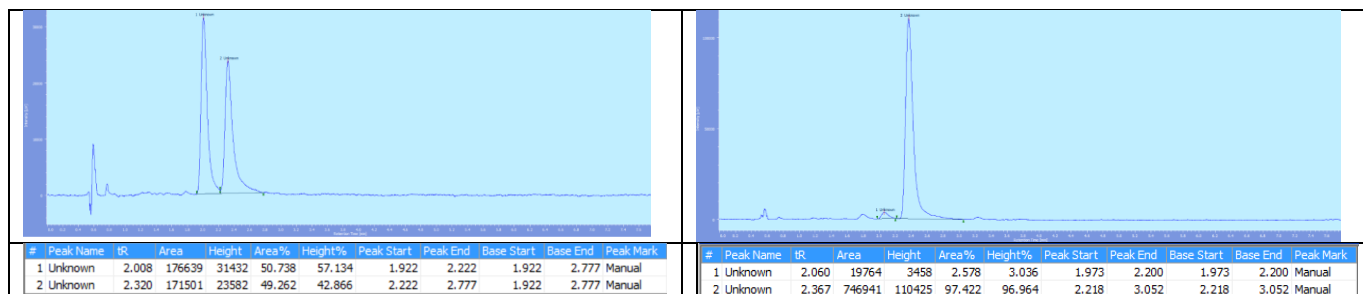

**(*S,Z*)-4-((*tert*-Butyldimethylsilyl)oxy)-*N*-(2-methoxybenzyl)-8-methylnona-1,4-dien-3-amine (7k)**

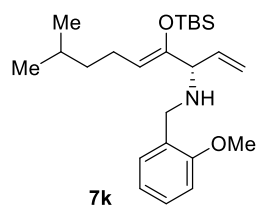

The reaction was run at 55 °C for 20 h. B:l = 16:1, yellow oil, 69 mg, 85% yield.  $[\alpha]_D^{25} +7.9$  (*c* 4.32, CHCl<sub>3</sub>) for 93% ee; <sup>1</sup>H NMR (400 MHz, CDCl<sub>3</sub>) δ 7.32 – 7.22 (m, 2H), 6.98 – 6.85 (m, 2H), 5.83 (ddd, *J* = 17.3, 10.2, 7.3 Hz, 1H), 5.29 – 5.18 (m, 2H), 4.79 (t, *J* = 7.0 Hz, 1H), 3.87 (s, 3H), 3.78 (dd, *J* = 36.6, 13.3 Hz, 2H), 3.50 (d, *J* = 7.3 Hz, 1H), 2.08 (dd, *J* = 15.5, 7.3 Hz, 2H), 1.88 (br s, 1H), 1.60 – 1.58 (m, 1H), 1.29 – 1.23 (m, 2H), 0.96 (s, 9H), 0.91 (d, *J* = 6.6 Hz, 6H), 0.11 (d, *J* = 1.1 Hz, 6H); <sup>13</sup>C NMR (151 MHz, CDCl<sub>3</sub>) δ 157.77, 149.97, 139.22, 130.06, 128.56, 128.13, 120.36, 116.39, 110.23,

109.28, 64.92, 55.17, 46.73, 39.03, 27.95, 25.97, 23.39, 22.66, 22.62, 18.44, -3.76, -3.95; HRMS (ESI): [M+H]<sup>+</sup> calcd for C<sub>24</sub>H<sub>42</sub>NO<sub>2</sub>Si<sup>+</sup> 404.2979, found 404.2980; HPLC: chiral OD-H column; detected at 220 nm; *n*-hexane/*i*-propanol = 99.8/0.2; flow = 0.5 mL/min; Retention time: 12.8 min (minor), 14.3 min (major).

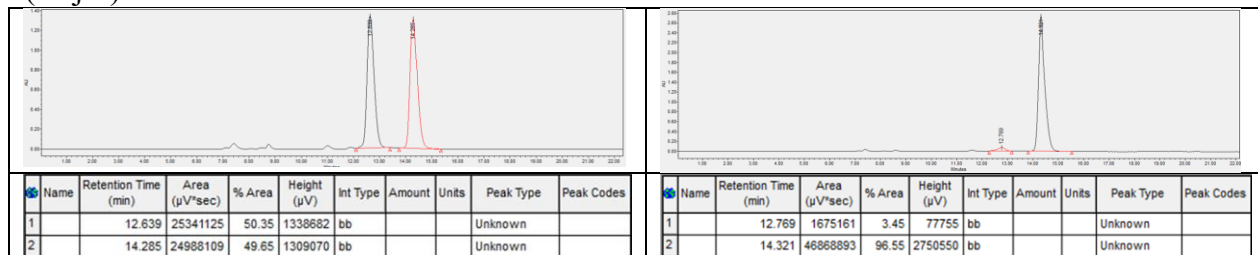

**(*S,Z*)-4-((*tert*-Butyldimethylsilyl)oxy)-8-methyl-*N*-(3-phenylpropyl)nona-1,4-dien-3-amine (7l)**

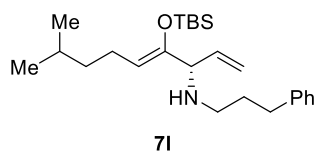

The reaction was run at 55 °C for 18 h. B:l = 11:1, yellow oil, 69 mg, 86% yield.  $[\alpha]_D^{25} -1.6$  (*c* 4.46, CHCl<sub>3</sub>) for 96% ee; <sup>1</sup>H NMR (400 MHz, CDCl<sub>3</sub>) δ 7.24 – 7.22 (m, 2H), 7.20 – 7.03 (m, 3H), 5.71 (ddd, *J* = 17.3, 10.2, 7.1 Hz, 1H), 5.19 – 5.03 (m, 2H), 4.61 (t, *J* = 7.0 Hz, 1H), 3.39 (d, *J* = 7.1 Hz, 1H), 2.73 – 2.35 (m, 4H), 1.99 (dd, *J* = 15.5, 7.3 Hz, 2H), 1.84 – 1.70 (m, 2H), 1.57 – 1.46 (m, 1H), 1.20 – 1.14 (m, 2H), 0.92 (s, 9H), 0.84 (d, *J* = 6.6 Hz,

6H), 0.11 (s, 3H), 0.10 (s, 3H); <sup>13</sup>C NMR (151 MHz, CDCl<sub>3</sub>) δ 149.64, 142.35, 139.03, 128.42, 128.36, 125.78, 116.10, 109.28, 66.02, 47.15, 39.03, 33.85, 32.08, 27.97, 26.02, 23.38, 22.65, 22.62, 18.51, -3.62, -3.71; HRMS (ESI): [M+H]<sup>+</sup> calcd for C<sub>25</sub>H<sub>44</sub>NOSi<sup>+</sup> 402.3187, found 402.3187; HPLC: chiral OD-H column; detected at 220 nm; *n*-hexane/*i*-propanol = 100/0; flow = 1.0 mL/min; Retention time: 7.7 min (minor), 15.1 min (major).



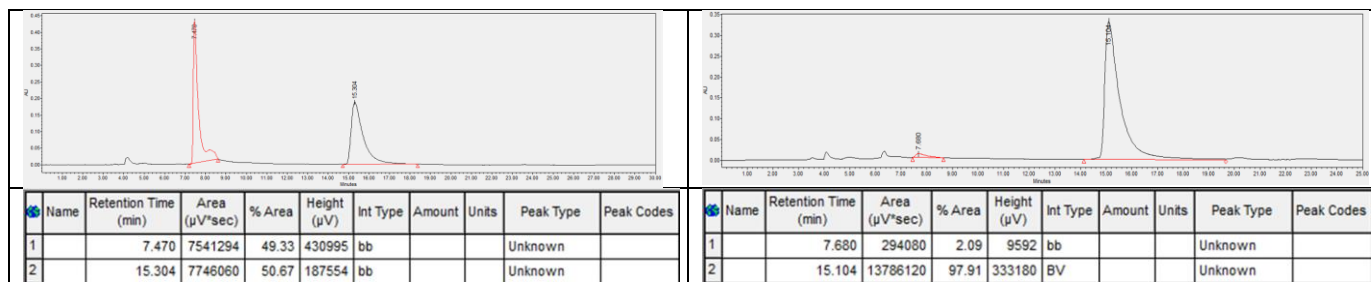

**(*S,Z*)-4-((*tert*-Butyldimethylsilyl)oxy)-8-methyl-*N*-(2-(thiophen-2-yl)ethyl)nona-1,4-dien-3-amine (7m)**

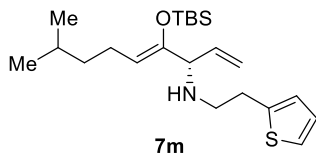

The reaction was run at 55 °C for 20 h. B:l = 18:1, yellow oil, 63 mg, 80% yield.  $[\alpha]_D^{25}$  -10.4 (*c* 1.08, CHCl<sub>3</sub>) for 96% ee; <sup>1</sup>H NMR (600 MHz, CDCl<sub>3</sub>) δ 7.13 (d, *J* = 4.7 Hz, 1H), 6.92 (dd, *J* = 5.0, 3.4 Hz, 1H), 6.84 (d, *J* = 2.9 Hz, 1H), 5.74 (ddd, *J* = 17.3, 10.2, 7.2 Hz, 1H), 5.19 – 5.13 (m, 2H), 4.63 (t, *J* = 7.0 Hz, 1H), 3.45 (d, *J* = 7.1 Hz, 1H), 3.07 – 2.95 (m, 2H), 2.92 – 2.76 (m, 2H), 2.01 (dd, *J* = 15.9, 7.0 Hz, 2H), 1.61 – 1.50 (m, 1H), 1.43 (s, 1H), 1.22 – 1.18 (m, 2H), 0.92 (s, 9H), 0.87 (d, *J* = 6.7 Hz, 6H), 0.11 (s, 3H), 0.10 (s, 3H); <sup>13</sup>C NMR (151 MHz, CDCl<sub>3</sub>) δ 149.43, 142.77, 138.75, 126.86, 125.02, 123.52, 116.32, 109.43, 65.79, 48.83, 38.99, 30.74, 27.94, 25.98, 23.34, 22.62, 22.61, 18.46, -3.67, -3.82; HRMS (ESI): [M+H]<sup>+</sup> calcd for C<sub>22</sub>H<sub>40</sub>NSOSi<sup>+</sup> 394.2594, found 394.2595; Ee value was determined by **7m'** from the hydrogenation of **7m**.

**(*S,Z*)-4-((*tert*-Butyldimethylsilyl)oxy)-8-methyl-*N*-(2-(thiophen-2-yl)ethyl)non-4-en-3-amine (7m')**

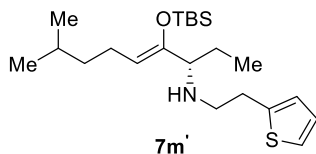

Procedure: To a well stirred solution of **7m** (38 mg, 0.10 mmol) in MeOH (2.0 mL) was added PtO<sub>2</sub> (5.5 mg, 0.040 mmol). The resulting mixture was stirred under hydrogen atmosphere for 12 h. After this time, it was condensed and purified by flash column chromatography (hexane/ethyl acetate = 20/1) to afford the pure substrate **7m'** (30 mg) as colorless oil in 79% yield.  $[\alpha]_D^{25}$  -19.5 (*c* 1.82, CHCl<sub>3</sub>) for 96% ee. <sup>1</sup>H NMR (400 MHz, CDCl<sub>3</sub>) δ 7.13 (d, *J* = 5.1 Hz, 1H), 6.92 (dd, *J* = 4.8, 3.6 Hz, 1H), 6.83 (d, *J* = 2.8 Hz, 1H), 4.51 (t, *J* = 7.0 Hz, 1H), 3.05 – 2.88 (m, 3H), 2.82 – 2.72 (m, 2H), 2.03 (dd, *J* = 15.4, 7.3 Hz, 2H), 1.61 – 1.50 (m, 2H), 1.47 – 1.39 (m, 1H), 1.20 (dd, *J* = 15.3, 7.2 Hz, 2H), 0.93 (s, 9H), 0.88 – 0.83 (m, 9H), 0.14 (s, 3H), 0.11 (s, 3H); <sup>13</sup>C NMR (151 MHz, CDCl<sub>3</sub>) δ 149.28, 143.00, 126.81, 124.92, 123.48, 108.89, 64.34, 48.72, 39.25, 30.81, 27.87, 26.37, 26.08, 23.30, 22.67, 22.64, 18.60, 10.56, -3.37, -3.75; HRMS (ESI): [M+H]<sup>+</sup> calcd for C<sub>22</sub>H<sub>42</sub>NSOSi<sup>+</sup> 396.2751, found 396.2750; HPLC: two chiral OD-H columns were connected to each other; detected at 220 nm; *n*-hexane/*i*-propanol = 99.5/0.5; flow = 0.5 mL/min; Retention time: 8.9 min (minor), 9.2 min (major).

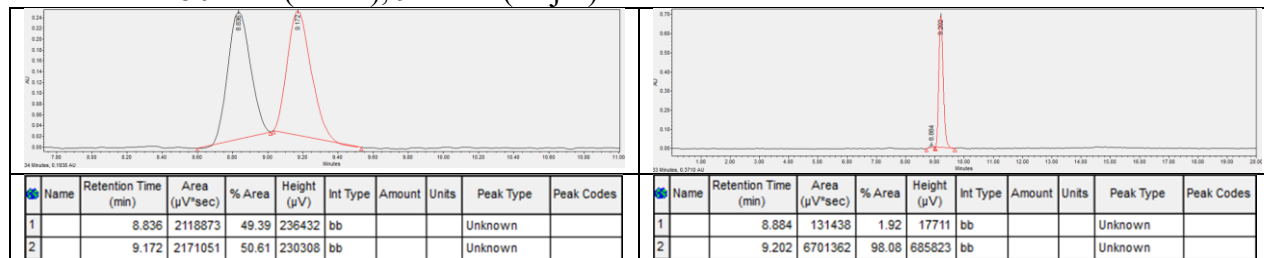

**(*S,Z*)-4-((*tert*-Butyldimethylsilyloxy)-7-phenyl-*N*-((*R*)-1-phenylethyl)hepta-1,4-dien-3-amine (7n)**

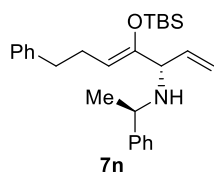

The reaction was run with  $[\text{Ir}(\text{COD})\text{Cl}]_2$  (4 mol%) and (*S<sub>a</sub>,S,S*)-L (8 mol%) in THF (0.5 M) at 55 °C for 22 h. B:l = 9:1, dr = 96:4, yellow oil, 64 mg, 76% yield.  $[\alpha]_{\text{D}}^{25}$  -22.3 (*c* 1.61,  $\text{CHCl}_3$ );  $^1\text{H NMR}$  (400 MHz,  $\text{CDCl}_3$ )  $\delta$  7.41 – 7.22 (m, 10H), 5.92 – 5.71 (m, 1H), 5.21 (d, *J* = 17.2 Hz, 1H), 5.10 (d, *J* = 10.3 Hz, 1H), 4.67 (t, *J* = 7.0 Hz, 1H), 3.87 (q, *J* = 6.6 Hz, 1H), 3.35 (d, *J* = 5.9 Hz, 1H), 2.73 (t, *J* = 7.7 Hz, 2H), 2.59 – 2.35 (m, 2H), 1.35 (d, *J* = 6.6 Hz, 3H), 0.97 (s, 9H), 0.14 (s, 3H), 0.05 (s, 3H);  $^{13}\text{C NMR}$  (151 MHz,  $\text{CDCl}_3$ )  $\delta$  149.83, 145.86, 142.26, 139.48, 128.56, 128.39, 128.33, 126.80 (two carbon signals are overlapped, CH of Ph), 125.79, 115.28, 107.95, 62.43, 54.83, 36.18, 27.00, 26.03, 25.01, 18.56, -3.56, -3.59; HRMS (ESI):  $[\text{M}+\text{H}]^{\oplus}$  calcd for  $\text{C}_{27}\text{H}_{40}\text{NOSi}^{\oplus}$  422.2874, found 422.2874.

**(*S*)-2-((*tert*-Butyldimethylsilyloxy)-*N*-((*R*)-1-(4-fluorophenyl)ethyl)penta-1,4-dien-3-amine (7o)**

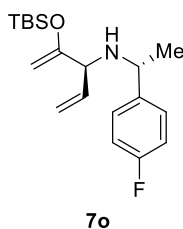

The reaction was run at 40 °C for 16 h. B:l = 8:1, dr = 95:5, colorless oil, 48 mg, 71% yield.  $[\alpha]_{\text{D}}^{25}$  +16.3 (*c* 2.53,  $\text{CHCl}_3$ );  $^1\text{H NMR}$  (400 MHz,  $\text{C}_6\text{D}_6$ )  $\delta$  7.36 – 7.25 (m, 2H), 7.11 – 6.96 (m, 2H), 5.77 (ddd, *J* = 17.5, 10.2, 7.5 Hz, 1H), 5.20 (d, *J* = 10.2 Hz, 1H), 5.10 (d, *J* = 17.2 Hz, 1H), 4.25 (d, *J* = 1.0 Hz, 1H), 4.15 (d, *J* = 1.3 Hz, 1H), 3.85 (q, *J* = 6.6 Hz, 1H), 3.41 (d, *J* = 7.5 Hz, 1H), 1.70 (s, 1H), 1.35 (d, *J* = 6.6 Hz, 3H), 0.93 (s, 9H), 0.20 (s, 3H), 0.19 (s, 3H);  $^{13}\text{C NMR}$  (101 MHz,  $\text{CDCl}_3$ )  $\delta$  161.84 (d, *J*<sub>CF</sub> = 244.2 Hz), 158.54, 141.51, 138.22, 128.29 (d, *J*<sub>CF</sub> = 7.8 Hz), 116.63, 115.16 (d, *J*<sub>CF</sub> = 21.1 Hz), 90.05, 62.81, 53.83, 25.76, 24.10, 18.17, -4.60, -4.76;  $^{19}\text{F NMR}$  (376 MHz,  $\text{CDCl}_3$ )  $\delta$  -115.60 (s, 1F); HRMS (ESI):  $[\text{M}+\text{H}]^{\oplus}$  calcd for  $\text{C}_{19}\text{H}_{31}\text{NFOSi}^{\oplus}$  336.2153, found 336.2150.

**(*S*)-2-((*tert*-Butyldimethylsilyloxy)-*N*-((*S*)-1-(naphthalen-2-yl)ethyl)penta-1,4-dien-3-amine (7p)**

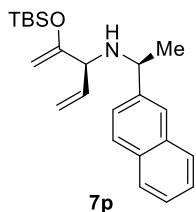

The reaction was run in THF (0.5 M) at 50 °C for 18 h. B:l = 13:1, dr = 97:3, yellow oil, 57 mg, 77% yield.  $[\alpha]_{\text{D}}^{25}$  -23.0 (*c* 2.51,  $\text{CHCl}_3$ );  $^1\text{H NMR}$  (400 MHz,  $\text{C}_6\text{D}_6$ )  $\delta$  7.88 – 7.73 (m, 4H), 7.55 (dd, *J* = 8.5, 1.5 Hz, 1H), 7.52 – 7.42 (m, 2H), 5.89 – 5.74 (m, 1H), 5.21 (dt, *J* = 17.2, 1.5 Hz, 1H), 5.08 (dt, *J* = 10.4, 1.4 Hz, 1H), 4.18 (d, *J* = 1.1 Hz, 1H), 4.06 – 3.94 (m, 2H), 3.34 (d, *J* = 5.9 Hz, 1H), 1.77 (s, 1H), 1.40 (d, *J* = 6.6 Hz, 3H), 0.97 (s, 9H), 0.27 (s, 3H), 0.22 (s, 3H);  $^{13}\text{C NMR}$  (151 MHz,  $\text{CDCl}_3$ )  $\delta$  157.41, 143.13, 138.83, 133.54, 132.93, 128.10, 127.84, 127.70, 125.83, 125.64, 125.44, 125.40, 115.24, 90.60, 62.70, 54.87, 25.77, 25.14, 18.22, -4.64, -4.71; HRMS (ESI):  $[\text{M}+\text{H}]^{\oplus}$  calcd for  $\text{C}_{23}\text{H}_{34}\text{NOSi}^{\oplus}$  368.2404, found 368.2403.

**(1*S*,2*R*)-1-(((*S*)-2-((*tert*-Butyldimethylsilyloxy)penta-1,4-dien-3-yl)amino)-2,3-dihydro-1*H*-inden-2-ol (7q)**

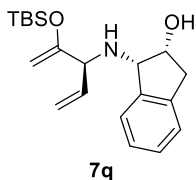

The reaction was run in THF (0.5 M) at 40 °C for 11 h. B:l = 10:1, dr = 95:5, yellow oil, 54 mg, 78% yield.  $[\alpha]_{\text{D}}^{25}$  +3.6 (*c* 1.75,  $\text{CHCl}_3$ );  $^1\text{H NMR}$  (400 MHz,  $\text{C}_6\text{D}_6$ )  $\delta$  7.26 – 7.21 (m, 4H), 5.96 – 5.78 (m, 1H), 5.35 (d, *J* = 17.3 Hz, 1H), 5.20 (d, *J* = 10.4 Hz, 1H), 4.36 (dd, *J* = 7.8, 4.4 Hz, 1H), 4.31 (d, *J* = 1.3 Hz, 1H), 4.25 (d, *J* = 1.4 Hz, 1H), 4.21 (d, *J* = 5.1 Hz, 1H), 3.74 (d, *J* = 5.9 Hz, 1H), 3.03 (d, *J* = 2.4 Hz, 2H), 2.02 (br s, 1H), 0.95 (s, 9H), 0.22 (s, 3H), 0.21 (s, 3H);  $^{13}\text{C NMR}$  (101 MHz,  $\text{CDCl}_3$ )  $\delta$  157.17, 142.39, 141.42, 137.95, 128.03,

126.70, 125.68, 123.61, 116.55, 91.42, 70.57, 64.53, 63.28, 39.76, 25.80, 18.21, -4.44, -4.87; HRMS (ESI):  $[M+H]^+$  calcd for  $C_{20}H_{32}NO_2Si^+$  346.2197, found 346.2195.

**(S)-2-((tert-Butyldimethylsilyloxy)-N-(((S)-tetrahydrofuran-2-yl)methyl)penta-1,4-dien-3-amine (7r)**

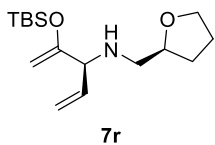

The reaction was run at 40 °C for 19 h. B:l = 8:1, dr = 98:2, yellow oil, 33 mg, 56% yield.  $[\alpha]_D^{25} +11.0$  (c 1.77,  $CHCl_3$ );  $^1H$  NMR (600 MHz,  $CDCl_3$ )  $\delta$  5.76 (ddd,  $J = 17.2, 10.2, 7.0$  Hz, 1H), 5.20 (dd,  $J = 17.2, 0.9$  Hz, 1H), 5.12 (dd,  $J = 10.3, 0.8$  Hz, 1H), 4.24 (s, 1H), 4.12 (s, 1H), 4.00 - 3.96 (m, 1H), 3.83 (dd,  $J = 14.9, 6.8$  Hz, 1H), 3.72 (dd,  $J = 14.6, 7.4$  Hz, 1H), 3.48 (d,  $J = 6.9$  Hz, 1H), 2.69 - 2.56 (m, 2H), 1.97 - 1.92 (m, 1H), 1.90 - 1.82 (m, 2H), 1.61 - 1.55 (m, 2H), 0.91 (s, 9H), 0.17 (s, 6H);  $^{13}C$  NMR (151 MHz,  $CDCl_3$ )  $\delta$  158.33, 138.59, 116.17, 89.89, 78.59, 68.00, 65.86, 51.52, 29.37, 25.90, 25.73, 18.14, -4.67, -4.71; HRMS (ESI):  $[M+H]^+$  calcd for  $C_{16}H_{32}NO_2Si^+$  298.2197, found 298.2198.

**(S)-N-((S)-sec-Butyl)-2-((tert-butyl(dimethyl)silyloxy)penta-1,4-dien-3-amine (7s)**

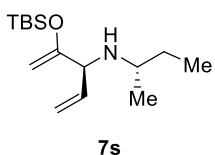

The reaction was run at 40 °C for 19 h. B:l > 20:1, dr = 95:5, yellow oil, 38 mg, 70% yield.  $[\alpha]_D^{25} +10.5$  (c 0.47,  $CHCl_3$ );  $^1H$  NMR (600 MHz,  $CDCl_3$ )  $\delta$  5.75 (ddd,  $J = 17.3, 10.2, 7.1$  Hz, 1H), 5.19 (dd,  $J = 17.2, 1.2$  Hz, 1H), 5.11 (dd,  $J = 10.2, 0.8$  Hz, 1H), 4.20 (s, 1H), 4.10 (s, 1H), 3.61 (d,  $J = 6.7$  Hz, 1H), 2.64 - 2.54 (m, 1H), 1.54 - 1.43 (m, 1H), 1.36 (s, 1H), 1.30 - 1.26 (m, 1H), 1.00 (d,  $J = 6.2$  Hz, 3H), 0.92 (s, 9H), 0.87 (t,  $J = 7.4$  Hz, 3H), 0.19 (s, 3H), 0.18 (s, 3H);  $^{13}C$  NMR (151 MHz,  $CDCl_3$ )  $\delta$  158.57, 138.96, 115.80, 89.83, 62.93, 50.81, 29.33, 25.76, 20.12, 18.17, 10.25, -4.64, -4.79; HRMS (ESI):  $[M+H]^+$  calcd for  $C_{15}H_{32}NOSi^+$  270.2248, found 270.2245.

**(S)-1-(2-((tert-Butyldimethylsilyloxy)penta-1,4-dien-3-yl)-4-phenylpiperazine (7t)**

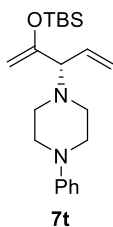

The reaction was run at RT for 11 h. B:l > 20:1, yellow oil, 66 mg, 92% yield.  $[\alpha]_D^{25} +7.5$  (c 4.16,  $CHCl_3$ ) for 97% ee;  $^1H$  NMR (600 MHz,  $CDCl_3$ )  $\delta$  7.26 (t,  $J = 8.0$  Hz, 2H), 6.93 (d,  $J = 8.0$  Hz, 2H), 6.84 (t,  $J = 7.3$  Hz, 1H), 5.87 (ddd,  $J = 17.4, 10.1, 8.4$  Hz, 1H), 5.24 (d,  $J = 17.2$  Hz, 1H), 5.18 (dd,  $J = 10.2, 1.6$  Hz, 1H), 4.29 (s, 1H), 4.17 (s, 1H), 3.21 - 3.12 (m, 4H), 3.13 (d,  $J = 8.3$  Hz, 1H), 2.70 - 2.63 (m, 4H), 0.94 (s, 9H), 0.18 (s, 6H);  $^{13}C$  NMR (151 MHz,  $CDCl_3$ )  $\delta$  157.61, 151.54, 137.34, 129.12, 119.45, 117.51, 115.88, 91.49, 74.21, 50.79, 49.39, 25.76, 18.20, -4.56, -4.65; HRMS (ESI):  $[M+H]^+$  calcd for  $C_{21}H_{35}F_7N_2OSi^+$  359.2513, found 359.2514; HPLC: chiral OD-H column; detected at 220 nm; *n*-hexane/*i*-propanol = 100/0; flow = 0.5 mL/min; Retention time: 28.1 min (minor), 28.9 min (major).

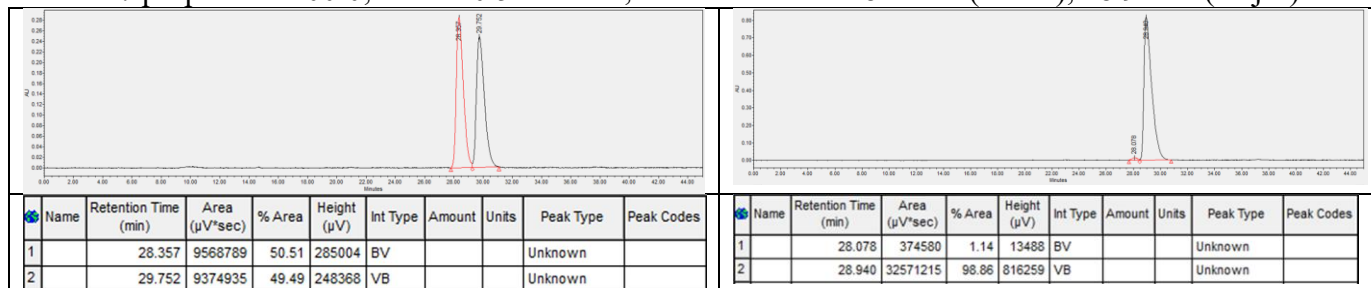



### (S)-N-(2-((*tert*-Butyldimethylsilyloxy)penta-1,4-dien-3-yl)-4-methylaniline (7u)

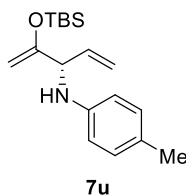

The general procedure was followed, except that DABCO (20 mol%) was added to the reaction along with the amine. The reaction was run at RT for 15 h. B:l > 20:1, yellow oil, 53 mg, 87% yield.  $[\alpha]_D^{25}$  -13.8 (*c* 3.28, CHCl<sub>3</sub>) for 96% ee; <sup>1</sup>H NMR (600 MHz, CDCl<sub>3</sub>)  $\delta$  6.97 (d, *J* = 8.3 Hz, 2H), 6.54 (d, *J* = 8.4 Hz, 2H), 5.90 (ddd, *J* = 17.0, 10.3, 5.7 Hz, 1H), 5.32 (dd, *J* = 17.2, 1.2 Hz, 1H), 5.19 (d, *J* = 10.3 Hz, 1H), 4.32 (d, *J* = 1.4 Hz, 1H), 4.26 (d, *J* = 5.5 Hz, 1H), 4.15 (d, *J* = 1.4 Hz, 1H), 3.87 (br s, 1H), 2.23 (s, 3H), 0.93 (s, 9H), 0.17 (s, 3H), 0.12 (s, 3H); <sup>13</sup>C NMR (151 MHz, CDCl<sub>3</sub>)  $\delta$  157.34, 144.79, 137.53, 129.62, 126.88, 116.18, 114.04, 90.30, 60.95, 25.77, 20.49, 18.18, -4.67, -4.75; HRMS (ESI):  $[M+H]^+$  calcd for C<sub>18</sub>H<sub>30</sub>NOSi<sup>+</sup> 304.2091, found 304.2087; HPLC: chiral OD-H column; detected at 220 nm; *n*-hexane/*i*-propanol = 99.5/0.5; flow = 1.0 mL/min; Retention time: 5.3 min (minor), 5.6 min (major).

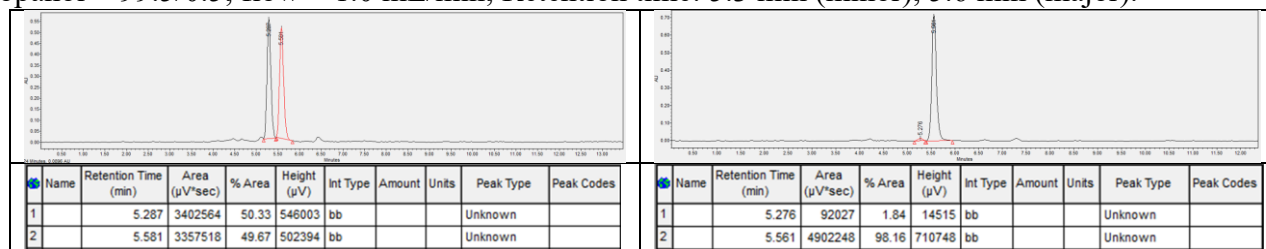

### (S)-N-(2-((*tert*-Butyldimethylsilyloxy)penta-1,4-dien-3-yl)-3-methoxy-5-(trifluoromethyl)aniline (7v)

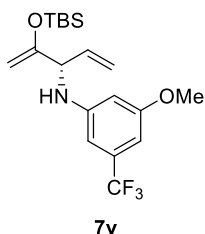

The general procedure was followed, except that DABCO (5 mol%) was added to the reaction along with the amine. The reaction was run at RT for 15 h. B:l > 20:1, yellow oil, 54 mg, 70% yield.  $[\alpha]_D^{25}$  -12.3 (*c* 2.87, CHCl<sub>3</sub>) for 98% ee; <sup>1</sup>H NMR (600 MHz, CDCl<sub>3</sub>)  $\delta$  6.46 (d, *J* = 12.9 Hz, 2H), 6.27 (s, 1H), 5.90 (ddd, *J* = 17.1, 10.3, 5.6 Hz, 1H), 5.34 (d, *J* = 17.2 Hz, 1H), 5.23 (d, *J* = 10.3 Hz, 1H), 4.33 (d, *J* = 1.4 Hz, 1H), 4.28 (t, *J* = 6.5 Hz, 1H), 4.18 (d, *J* = 1.6 Hz, 2H), 3.78 (s, 3H), 0.92 (s, 9H), 0.18 (s, 3H), 0.12 (s, 3H); <sup>13</sup>C NMR (101 MHz, CDCl<sub>3</sub>)  $\delta$  160.87, 156.55, 148.60, 136.64, 132.28 (q, *J*<sub>CF</sub> = 31.8 Hz), 125.61, 116.73, 103.62, 102.36, 99.60, 90.68, 60.59, 55.41, 25.71, 18.17, -4.74, -4.82; <sup>19</sup>F NMR (376 MHz, CDCl<sub>3</sub>)  $\delta$  -62.28 (s, 3F); HRMS (EI):  $[M]^+$  calcd for C<sub>19</sub>H<sub>28</sub>NF<sub>3</sub>O<sub>2</sub>Si<sup>+</sup> 387.1841, found 387.1849; HPLC: chiral OD-H column; detected at 220 nm; *n*-hexane/*i*-propanol = 99/1; flow = 1.0 mL/min; Retention time: 5.5 min (minor), 5.7 min (major).

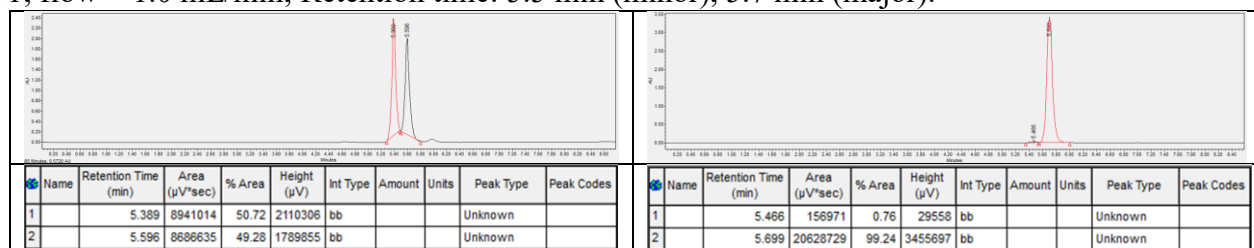

**(S)-N-(2-((*tert*-Butyldimethylsilyloxy)penta-1,4-dien-3-yl)-1-methyl-1*H*-indol-5-amine (7w)**

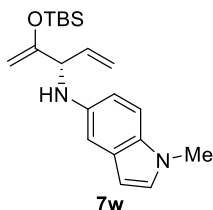

The general procedure was followed, except that DABCO (40 mol%) was added to the reaction along with the amine. The reaction was run at RT for 12 h. B:l > 20:1, yellow oil, 60 mg, 88% yield.  $[\alpha]_D^{25}$  -14.4 (*c* 3.77, CHCl<sub>3</sub>) for 98% ee; <sup>1</sup>H NMR (600 MHz, CDCl<sub>3</sub>) δ 7.13 (d, *J* = 8.6 Hz, 1H), 6.94 (d, *J* = 3.0 Hz, 1H), 6.85 (d, *J* = 1.9 Hz, 1H), 6.68 (dd, *J* = 8.6, 1.9 Hz, 1H), 6.30 (d, *J* = 2.9 Hz, 1H), 5.96 (ddd, *J* = 16.4, 10.3, 5.8 Hz, 1H), 5.37 (dd, *J* = 17.2, 0.9 Hz, 1H), 5.20 (d, *J* = 10.3 Hz, 1H), 4.35 (s, 1H), 4.33 (d, *J* = 5.8 Hz, 1H), 4.16 (s, 1H), 3.82 (s, 0H), 3.72 (s, 3H), 0.96 (s, 3H), 0.20 (s, 3H),

0.14 (s, 3H); <sup>13</sup>C NMR (151 MHz, CDCl<sub>3</sub>) δ 157.75, 140.73, 138.02, 131.57, 129.23, 128.83, 116.01, 112.56, 109.62, 104.44, 99.79, 90.24, 62.22, 32.88, 25.80, 18.19, -4.67, -4.68; HRMS (ESI): [M+Na]<sup>+</sup> calcd for C<sub>20</sub>H<sub>30</sub>N<sub>2</sub>OSiNa<sup>+</sup> 365.2020, found 365.2022; HPLC: chiral OD-H column; detected at 220 nm; *n*-hexane/*i*-propanol = 99.5/0.5; flow = 1.0 mL/min; Retention time: 24.0 min (minor), 25.9 min (major).

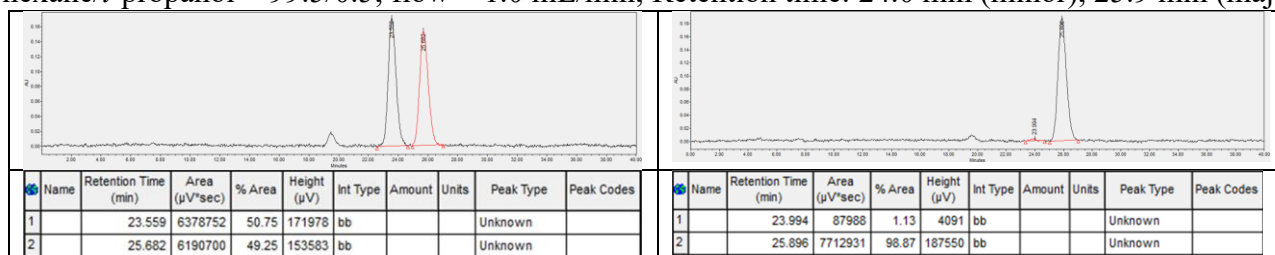

**(S)-5-(2-((*tert*-Butyldimethylsilyloxy)penta-1,4-dien-3-yl)-4,5,6,7-tetrahydrothieno[3,2-*c*]pyridine (7x)**

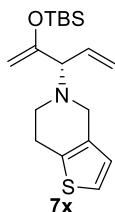

The reaction was run in THF (0.5 M), 50 °C for 11 h. B:l > 20:1, yellow oil, 57 mg, 85% yield.  $[\alpha]_D^{25}$  +28.6 (*c* 2.25, CHCl<sub>3</sub>) for 98% ee; <sup>1</sup>H NMR (600 MHz, CDCl<sub>3</sub>) δ 7.05 (d, *J* = 5.1 Hz, 1H), 6.72 (d, *J* = 5.1 Hz, 1H), 5.95 – 5.83 (m, 1H), 5.26 (d, *J* = 17.2 Hz, 1H), 5.19 (dd, *J* = 10.2, 1.5 Hz, 1H), 4.34 (s, 1H), 4.20 (s, 1H), 3.69 (d, *J* = 14.5 Hz, 1H), 3.56 (d, *J* = 14.5 Hz, 1H), 3.36 (d, *J* = 8.0 Hz, 1H), 3.06 – 2.99 (m, 1H), 2.90 – 2.80 (m, 2H), 2.74 (ddd, *J* = 11.9, 7.6, 4.7 Hz, 1H), 0.92 (s, 9H), 0.19 (s, 3H), 0.18 (s, 3H);

<sup>13</sup>C NMR (151 MHz, CDCl<sub>3</sub>) δ 157.75, 137.42, 134.52, 133.69, 125.48, 122.46, 117.37, 91.44, 73.09, 50.99, 48.07, 25.98, 25.80, 18.20, -4.57, -4.60; HRMS (ESI): [M+H]<sup>+</sup> calcd for C<sub>18</sub>H<sub>30</sub>NSOSi<sup>+</sup> 336.1812, found 336.1811; HPLC: chiral OD-H column; detected at 220 nm; *n*-hexane/*i*-propanol = 100/0; flow = 0.5 mL/min; Retention time: 21.0 min (minor), 21.6 min (major).

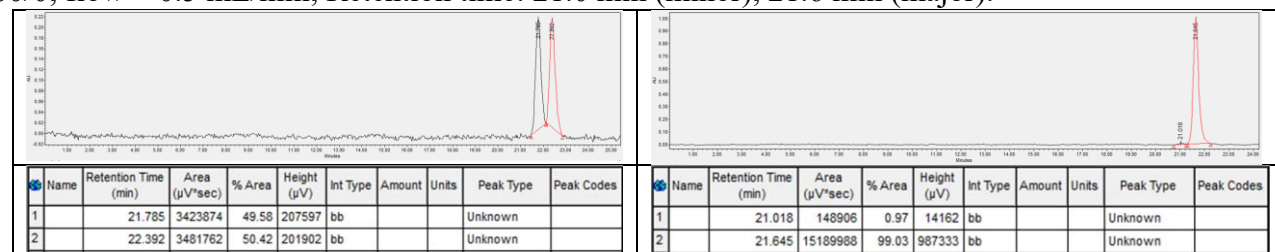

**(S)-4-Benzyl-1-(2-((*tert*-Butyldimethylsilyl)oxy)penta-1,4-dien-3-yl)piperidine (7y)**

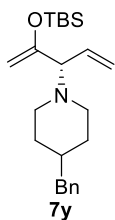

The reaction was run at RT for 18 h. B:l > 20:1, yellow oil, 56 mg, 75% yield.  $[\alpha]_D^{25} +11.4$  (*c* 0.79, CHCl<sub>3</sub>) for 98% ee; <sup>1</sup>H NMR (600 MHz, CDCl<sub>3</sub>) δ 7.27 (t, *J* = 7.5 Hz, 2H), 7.18 (t, *J* = 7.3 Hz, 0H), 7.14 (d, *J* = 7.1 Hz, 1H), 5.91 – 5.76 (m, 1H), 5.13 (dd, *J* = 23.9, 13.7 Hz, 2H), 4.22 (s, 1H), 4.13 (s, 1H), 3.09 (d, *J* = 8.0 Hz, 1H), 2.94 (dd, *J* = 28.8, 10.7 Hz, 2H), 2.52 (d, *J* = 7.2 Hz, 2H), 1.94 (q, *J* = 12.1 Hz, 2H), 1.60 (d, *J* = 12.7 Hz, 2H), 1.55 – 1.45 (m, 1H), 1.32 – 1.22 (m, 2H), 0.92 (s, 9H), 0.16 (d, *J* = 1.0 Hz, 6H);

<sup>13</sup>C NMR (101 MHz, CDCl<sub>3</sub>) δ 158.06, 141.04, 137.65, 129.20, 128.18, 125.75, 116.81, 91.21, 74.19, 51.33, 51.17, 43.40, 38.26, 32.65, 25.79, 18.19, -4.60; HRMS (ESI): [M+H]<sup>+</sup> calcd for C<sub>23</sub>H<sub>38</sub>NOSi<sup>+</sup> 372.2717, found 372.2721; Ee value was determined by 7y' from the hydrogenation of 7y.

**(S)-4-Benzyl-1-(2-((*tert*-butyldimethylsilyl)oxy)pent-1-en-3-yl)piperidine (7y')**

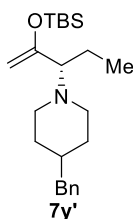

This compound was prepared by a synthetic procedure that was the same as that used to prepare 7m'. Colorless oil, 46 mg, 62% yield.  $[\alpha]_D^{25} +13.7$  (*c* 1.42, CHCl<sub>3</sub>) for 98% ee; <sup>1</sup>H NMR (400 MHz, CDCl<sub>3</sub>) δ 7.33 – 7.29 (m, 2H), 7.24 – 7.17 (m, 3H), 4.17 (s, 1H), 4.01 (s, 1H), 2.96 (d, *J* = 11.1 Hz, 1H), 2.77 – 2.73 (m, 2H), 2.56 (d, *J* = 7.0 Hz, 2H), 2.32 (dd, *J* = 11.5, 9.9 Hz, 1H), 2.11 (t, *J* = 11.2 Hz, 1H), 1.79 – 1.71 (m, 1H), 1.66 (d, *J* = 11.8 Hz, 2H), 1.57 – 1.51 (m, 2H), 1.43 – 1.32 (m, 1H), 1.28 – 1.17 (m, 1H), 0.95 (s, 9H), 0.90 (t, *J* = 7.4 Hz, 3H), 0.23 (s, 3H), 0.21 (s, 3H); <sup>13</sup>C NMR (151 MHz, CDCl<sub>3</sub>) δ 156.07, 141.10, 129.24, 128.16, 125.72, 91.80, 71.52, 52.56, 48.18, 43.51, 38.42, 33.28, 32.97, 25.81, 22.75, 18.13, 11.24, -4.25, -4.95; HRMS (ESI): [M+H]<sup>+</sup> calcd for C<sub>23</sub>H<sub>40</sub>NOSi<sup>+</sup> 374.2874, found 374.2871; HPLC: chiral OD-H + OD-H column; detected at 220 nm; *n*-hexane/*i*-propanol = 99/1; flow = 0.5 mL/min; Retention time: 17.1 min (major), 19.0 min (minor).

Retention time: 17.1 min (major), 19.0 min (minor).

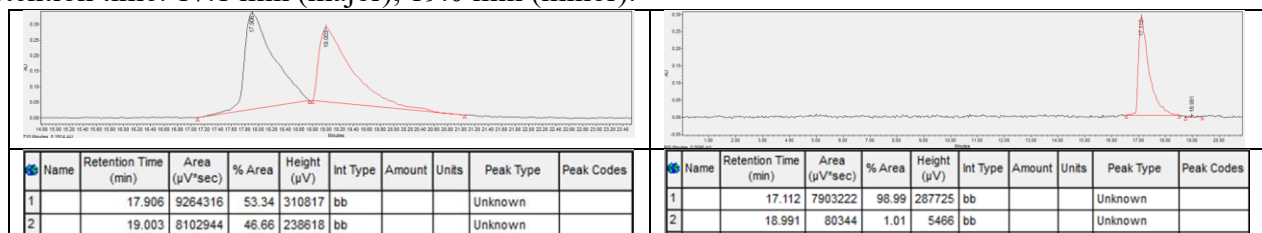

**Methyl ((S)-2-((*tert*-butyldimethylsilyl)oxy)penta-1,4-dien-3-yl)-L-phenylalaninate (8a)**

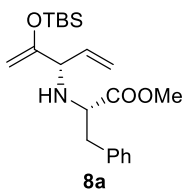

The reaction was run at RT for 19 h. B:l > 20:1, dr > 99:1, yellow oil, 65 mg, 87% yield.  $[\alpha]_D^{25} +6.5$  (*c* 3.11, CHCl<sub>3</sub>). <sup>1</sup>H NMR (400 MHz, CDCl<sub>3</sub>) δ 7.33 – 7.22 (m, 5H), 5.78 (ddd, *J* = 17.3, 10.2, 7.2 Hz, 1H), 5.22 (d, *J* = 17.2 Hz, 1H), 5.13 (d, *J* = 10.2 Hz, 1H), 4.19 (s, 1H), 4.12 (s, 1H), 3.74 – 3.59 (m, 4H), 3.49 (d, *J* = 7.1 Hz, 1H), 3.08 – 2.90 (m, 2H), 1.83 (s, 1H), 0.90 (s, 9H), 0.16 (s, 3H), 0.16 (s, 3H); <sup>13</sup>C NMR (101 MHz, CDCl<sub>3</sub>) δ 175.00, 157.51, 138.09, 137.33, 129.32, 128.48, 126.76, 116.46, 90.37, 64.51, 60.37,

51.63, 40.07, 25.72, 18.10, -4.71, -4.75; HRMS (ESI): [M+Na]<sup>+</sup> calcd for C<sub>21</sub>H<sub>33</sub>NO<sub>3</sub>NaSi<sup>+</sup> 398.2121, found 398.2122.

### (*S*)-2-(((*S*)-2-((*tert*-Butyldimethylsilyloxy)penta-1,4-dien-3-yl)amino)-4-methylpentan-1-ol (8b)

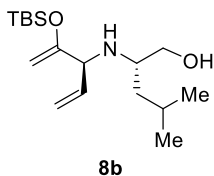

The reaction was run at 40 °C for 19 h. B:l = 5:1, dr = 93:7, yellow oil, 44 mg, 71% yield.  $[\alpha]_D^{25} +19.5$  (*c* 1.57, CHCl<sub>3</sub>). <sup>1</sup>H NMR (600 MHz, CDCl<sub>3</sub>)  $\delta$  5.75 (ddd, *J* = 16.9, 10.3, 6.3 Hz, 1H), 5.24 (d, *J* = 17.2 Hz, 1H), 5.12 (d, *J* = 10.3 Hz, 1H), 4.19 (d, *J* = 1.1 Hz, 1H), 4.14 (d, *J* = 1.1 Hz, 1H), 3.62 – 3.56 (m, 2H), 3.21 (dd, *J* = 10.6, 4.8 Hz, 1H), 2.81 – 2.71 (m, 1H), 1.66 – 1.57 (m, 1H), 1.34 – 1.27 (m, 2H), 0.92 (s, 9H), 0.88 (t, *J* = 6.3 Hz, 6H), 0.19 (s, 3H), 0.18 (s, 3H); <sup>13</sup>C NMR (151 MHz, CDCl<sub>3</sub>)  $\delta$  157.81, 138.78, 116.09, 90.58, 63.07, 62.93, 53.40, 42.03, 25.75, 24.95, 23.32, 22.72, 18.17, -4.54, -4.98; HRMS (ESI):  $[M+Na]^+$  calcd for C<sub>17</sub>H<sub>35</sub>NO<sub>2</sub>NaSi<sup>+</sup> 336.2329, found 336.2331.

### (*R*)-1-(((*S*)-2-((*tert*-Butyldimethylsilyloxy)penta-1,4-dien-3-yl)pyrrolidin-3-ol (8c)

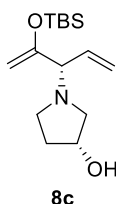

The reaction was run at RT for 19 h. B:l = 13:1, dr = 95:5, yellow oil, 41 mg, 72% yield.  $[\alpha]_D^{25} +31.1$  (*c* 0.98, CHCl<sub>3</sub>). <sup>1</sup>H NMR (600 MHz, CDCl<sub>3</sub>)  $\delta$  5.84 (ddd, *J* = 17.3, 10.0, 8.6 Hz, 1H), 5.19 (d, *J* = 17.2 Hz, 1H), 5.09 (dd, *J* = 10.1, 1.5 Hz, 1H), 4.28 – 4.26 (m, 2H), 4.11 (s, 1H), 3.07 (d, *J* = 8.5 Hz, 1H), 2.93 – 2.89 (m, 1H), 2.69 (d, *J* = 10.2 Hz, 1H), 2.51 (dd, *J* = 10.2, 4.9 Hz, 1H), 2.32 – 2.28 (m, 1H), 2.17 – 1.97 (m, 2H), 1.75 – 1.64 (m, 1H), 0.92 (s, 9H), 0.17 (m, 3H), 0.16 (m, 3H); <sup>13</sup>C NMR (151 MHz, CDCl<sub>3</sub>)  $\delta$  158.32, 138.20, 116.70, 90.68, 73.33, 71.18, 60.79, 50.08, 34.72, 25.74, 18.20, -4.54, -4.71; HRMS (ESI):  $[M+Na]^+$  calcd for C<sub>15</sub>H<sub>29</sub>NO<sub>2</sub>NaSi<sup>+</sup> 306.1859, found 306.1859.

### Peptide-1 (8d)

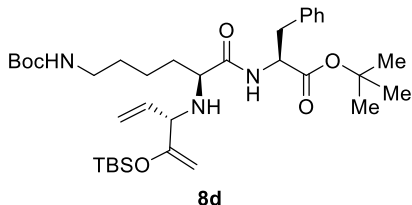

The reaction was run with **1a** (0.2 mmol), peptide **26** (0.1 mmol), [Ir(COD)Cl]<sub>2</sub> (4 mol%) and (*S*<sub>a</sub>,*S*,*S*)-L (8 mol%) in THF (0.5 M) at 50 °C for 2 d. B:l = 9:1, dr = 95:5, yellow oil, 43 mg, 67% yield.  $[\alpha]_D^{25} +0.1$  (*c* 2.45, CHCl<sub>3</sub>). <sup>1</sup>H NMR (600 MHz, CDCl<sub>3</sub>)  $\delta$  7.65 (d, *J* = 8.5 Hz, 1H), 7.25 – 7.24 (m, 2H), 7.21 – 7.18 (m, 1H), 7.14 (d, *J* = 7.4 Hz, 2H), 5.79 – 5.66 (m, 1H), 5.18 (d, *J* = 17.3 Hz, 1H), 5.05 (d, *J* = 10.4 Hz, 1H), 4.70 (dd, *J* = 14.4, 7.1 Hz, 1H), 4.47 (br s, 1H), 4.11 (d, *J* = 14.1 Hz, 2H), 3.39 (s, 1H), 3.14 – 2.96 (m, 5H), 1.55 – 1.49 (m, 1H), 1.46 – 1.38 (m, 22H), 1.22 – 1.15 (m, 2H), 0.88 (s, 9H), 0.14 (s, 3H), 0.14 (s, 3H); <sup>13</sup>C NMR (151 MHz, CDCl<sub>3</sub>)  $\delta$  173.82, 170.58, 156.22, 155.94, 137.92, 136.55, 129.48, 128.42, 126.89, 115.96, 91.57, 81.89, 79.09, 64.08, 59.72, 52.99, 40.32, 38.39, 33.74, 30.01, 28.50, 28.03, 25.76, 23.05, 18.16, -4.55, -4.94; HRMS (ESI):  $[M+H]^+$  calcd for C<sub>35</sub>H<sub>60</sub>N<sub>3</sub>O<sub>6</sub>Si<sup>+</sup> 646.4246, found 646.4245.

### Peptide-2 (8e)

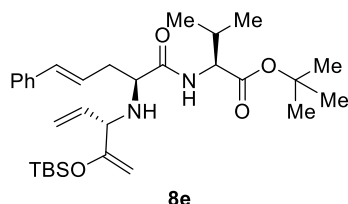

The reaction was run with **1a** (0.2 mmol), peptide **29** (0.1 mmol), [Ir(COD)Cl]<sub>2</sub> (4 mol%) and (*S*<sub>a</sub>,*S*,*S*)-L (8 mol%) in THF (0.5 M) at 50 °C for 2 d. B:l = 15:1, dr = 96:4, yellow oil, 42 mg, 77% yield.  $[\alpha]_D^{25} +45.3$  (*c* 3.13, CHCl<sub>3</sub>). <sup>1</sup>H NMR (400 MHz, CDCl<sub>3</sub>)  $\delta$  7.82 (d, *J* = 9.5 Hz, 1H), 7.35 – 7.27 (m, 4H), 7.24 – 7.16 (m, 1H), 6.46 (d, *J* = 15.8 Hz, 1H), 6.20 – 6.03 (m, 1H), 5.61 (ddd, *J* = 17.2, 10.1, 8.3

Hz, 1H), 5.18 (d,  $J = 10.1$  Hz, 1H), 5.11 (d,  $J = 17.1$  Hz, 1H), 4.45 (dd,  $J = 9.6, 4.5$  Hz, 1H), 4.26 (d,  $J = 1.3$  Hz, 1H), 4.05 (d,  $J = 1.4$  Hz, 1H), 3.43 – 3.25 (m, 2H), 2.84 – 2.66 (m, 1H), 2.45 (dt,  $J = 14.1, 8.8$  Hz, 1H), 2.31 – 2.15 (m, 1H), 1.79 (d,  $J = 9.8$  Hz, 1H), 1.46 (s, 9H), 0.96 (d,  $J = 6.9$  Hz, 3H), 0.91 (d,  $J = 6.9$  Hz, 3H), 0.80 (s, 9H), 0.15 (s, 3H), 0.11 (s, 3H);  $^{13}\text{C}$  NMR (151 MHz,  $\text{CDCl}_3$ )  $\delta$  173.82, 170.88, 158.52, 136.96, 136.89, 133.78, 128.50, 127.40, 126.32, 126.00, 117.52, 89.10, 81.57, 64.63, 58.48, 57.00, 37.37, 31.06, 28.11, 25.60, 19.35, 18.00, 17.45, -4.62, -4.90; HRMS (ESI):  $[\text{M}+\text{H}]^{\oplus}$  calcd for  $\text{C}_{31}\text{H}_{51}\text{N}_2\text{O}_4\text{Si}^{\oplus}$  543.3613, found 543.3614.

## 6.2 Scope for the construction of an $\alpha$ C-O bond

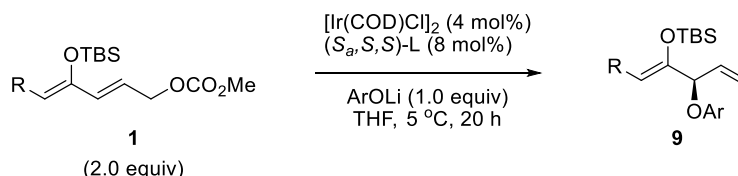

General procedure: To a 4 mL vial containing a magnetic stir bar were added  $[\text{Ir}(\text{COD})\text{Cl}]_2$  (2.6 mg, 0.0040 mmol), ( $R_a, R, R$ )-L (4.4 mg, 0.0080 mmol) and THF (0.2 mL) in a nitrogen-filled glovebox. The resulting mixture was stirred at RT for 10 min. After this time, *n*-propylamine (0.1 mL) was added to the reaction. The vial was sealed with a PTFE-lined cap and stirred at 50 °C for 20 min. Next, the volatile materials were evaporated under vacuum. Compound **1** (0.20 mmol) in THF (0.2 mL) was added, and the reaction was stirred at RT for 10 min. After this time, the phenoxide ArOLi (0.1 mmol) was added to the reaction. The vial was sealed with a PTFE lined cap and was removed from the glovebox and stirred at 5 °C for 20 h. After this time, the crude reaction solution was condensed to obtain a  $^1\text{H}$  NMR spectrum (with  $\text{CH}_2\text{Br}_2$  as internal standard). The product was further purified by flash column chromatography using hexane/ethyl acetate as eluent to afford pure **9**.

### (*R*)-*tert*-Butyldimethyl((3-phenoxy-penta-1,4-dien-2-yl)oxy)silane (**9a**)

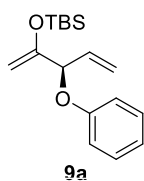

Colorless oil, b:l = 13:1, 21 mg, 71% yield.  $[\alpha]_{\text{D}}^{25} -7.2$  ( $c$  0.87,  $\text{CHCl}_3$ ) for 94% ee;  $^1\text{H}$  NMR (600 MHz,  $\text{CDCl}_3$ )  $\delta$  7.28 – 7.24 (m, 2H), 6.94 – 6.93 (m, 3H), 6.06 – 5.94 (m, 1H), 5.41 (dd,  $J = 17.3, 1.2$  Hz, 1H), 5.27 (dd,  $J = 10.5, 1.2$  Hz, 1H), 4.86 (d,  $J = 5.7$  Hz, 1H), 4.46 (s, 1H), 4.24 (s, 1H), 0.93 (s, 9H), 0.19 (s, 3H), 0.15 (s, 3H);  $^{13}\text{C}$  NMR (151 MHz,  $\text{CDCl}_3$ )  $\delta$  157.96, 156.18, 135.55, 129.32, 121.03, 117.40, 116.02, 90.95, 79.96, 25.72, 18.16, -4.48, -4.80; HRMS (EI):  $[\text{M}]^{\oplus}$  calcd for  $\text{C}_{17}\text{H}_{26}\text{O}_2\text{Si}^{\oplus}$  290.1702, found 290.1705; HPLC: two chiral OD-H columns were connected to each other; detected at 220 nm; *n*-hexane/*i*-propanol = 100/0; flow = 0.5 mL/min; Retention time: 28.2 min (minor), 30.7 min (major).

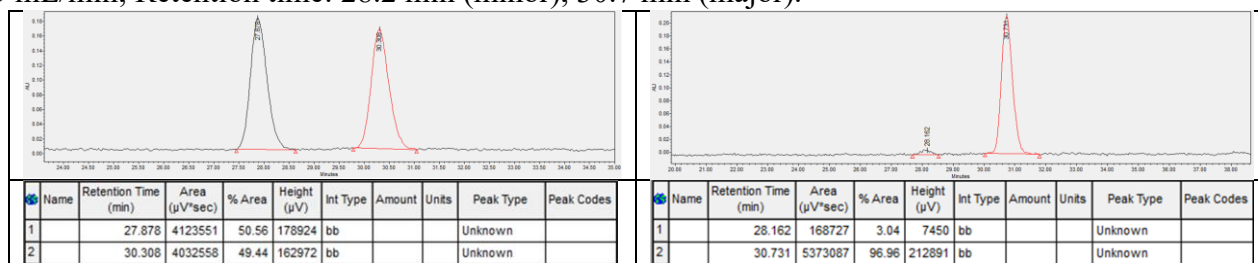

**(R)-((3-(2-Allylphenoxy)penta-1,4-dien-2-yl)oxy)(tert-butyl)dimethylsilane (9b)**

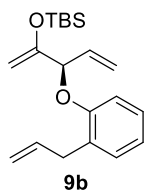

The reaction was run at 50 °C for 2 d. Colorless oil, b:l = 11:1, 20 mg, 61% yield.  $[\alpha]_D^{25}$  -8.1 (*c* 0.42, CHCl<sub>3</sub>) for 94% ee; <sup>1</sup>H NMR (400 MHz, CDCl<sub>3</sub>) δ 7.17 – 7.13 (m, 2H), 7.01 – 6.79 (m, 2H), 6.09 – 5.96 (m, 2H), 5.42 (d, *J* = 17.3 Hz, 1H), 5.26 (d, *J* = 10.5 Hz, 1H), 5.12 – 5.04 (m, 2H), 4.87 (d, *J* = 5.8 Hz, 1H), 4.48 (s, 1H), 4.23 (d, *J* = 1.3 Hz, 1H), 3.47 (d, *J* = 6.1 Hz, 2H), 0.96 (s, 9H), 0.22 (s, 3H), 0.18 (s, 3H); <sup>13</sup>C NMR (101 MHz, CDCl<sub>3</sub>) δ 156.36, 155.41, 137.14, 135.80, 129.88, 129.34, 127.05, 120.86, 117.02,

115.50, 113.23, 90.10, 79.84, 34.65, 25.72, 18.14, -4.52, -4.76; HRMS (ESI): [M+Na]<sup>⊕</sup> calcd for C<sub>20</sub>H<sub>30</sub>O<sub>2</sub>NaSi<sup>⊕</sup> 353.1907, found 353.1910; HPLC: chiral OD-H column; detected at 220 nm; *n*-hexane/*i*-propanol = 100/0; flow = 0.5 mL/min; Retention time: 12.8 min (minor), 13.3 min (major).

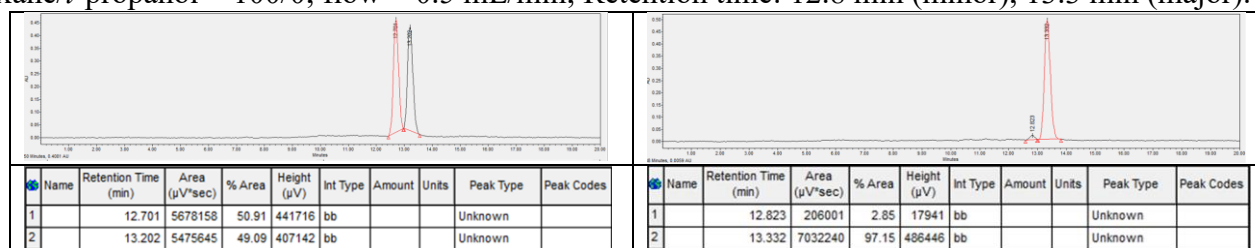

**Methyl (S)-2-((tert-butoxycarbonyl)amino)-3-(4-(((R)-2-((tert-butyl)dimethylsilyloxy)penta-1,4-dien-3-yl)oxy)phenyl)propanoate (9c)**

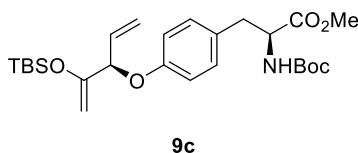

Yellow oil, b:l = 13:1, dr = 96:4, 40 mg, 81% yield.  $[\alpha]_D^{25}$  +25.4 (*c* 2.10, CHCl<sub>3</sub>). <sup>1</sup>H NMR (400 MHz, CDCl<sub>3</sub>) δ 7.00 (d, *J* = 8.4 Hz, 2H), 6.85 (d, *J* = 8.5 Hz, 2H), 5.97 (ddd, *J* = 16.8, 10.4, 6.0 Hz, 1H), 5.39 (d, *J* = 17.3 Hz, 1H), 5.26 (d, *J* = 10.4 Hz, 1H), 4.94 (d, *J* = 7.7 Hz, 1H), 4.81 (d, *J* = 5.9 Hz, 1H), 4.53 (dd, *J* = 13.8, 6.2 Hz, 1H), 4.44 (s, 1H), 4.23 (d, *J* = 1.1 Hz, 1H), 3.70 (s, 3H), 3.10 – 2.92 (m, 2H), 1.42

(s, 9H), 0.92 (s, 9H), 0.18 (s, 3H), 0.13 (s, 3H); <sup>13</sup>C NMR (151 MHz, CDCl<sub>3</sub>) δ 172.52, 157.06, 156.11, 155.18, 135.49, 130.16, 128.29, 117.39, 116.06, 90.94, 80.05, 79.94, 54.57, 52.22, 37.55, 28.38, 25.70, 18.14, -4.48, -4.82; HRMS (ESI): [M+H]<sup>⊕</sup> calcd for C<sub>29</sub>H<sub>45</sub>O<sub>3</sub>Si<sup>⊕</sup> 469.3132, found 469.3123.

**Methyl (S)-2-((tert-butoxycarbonyl)amino)-3-(4-(((R,Z)-4-((tert-butyl)dimethylsilyloxy)-8-methylnona-1,4-dien-3-yl)oxy)phenyl)propanoate (9d)**

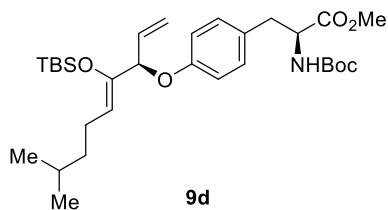

Yellow oil, b:l = 11:1, dr = 97:3, 42 mg, 75% yield.  $[\alpha]_D^{25}$  +31.1 (*c* 2.97, CHCl<sub>3</sub>). <sup>1</sup>H NMR (600 MHz, CDCl<sub>3</sub>) δ 6.99 (d, *J* = 8.0 Hz, 2H), 6.83 (d, *J* = 8.5 Hz, 2H), 6.06 – 5.88 (m, 1H), 5.33 (d, *J* = 17.3 Hz, 1H), 5.26 (d, *J* = 10.5 Hz, 1H), 4.95 (d, *J* = 7.7 Hz, 1H), 4.86 – 4.83 (m, 2H), 4.53 (d, *J* = 6.3 Hz, 1H), 3.69 (s, 3H), 3.06 – 2.94 (m, 2H), 2.06 (dd, *J* = 15.4, 7.4 Hz, 2H), 1.56 – 1.51 (m, 1H), 1.42 (s, 9H), 1.22 (dd, *J* = 15.3, 6.9 Hz, 2H), 0.95 (s, 9H), 0.87 (d, *J* = 6.6 Hz, 6H),

0.16 (s, 3H), 0.09 (s, 3H); <sup>13</sup>C NMR (151 MHz, CDCl<sub>3</sub>) δ 172.55, 157.19, 155.17, 147.27, 135.45, 130.18, 128.11, 117.43, 115.96, 112.40, 80.79, 79.94, 54.59, 52.22, 38.71, 37.61, 28.39, 27.97, 26.04, 23.32, 22.60, 22.59, 18.63, -3.70, -3.90; HRMS (ESI): [M+Na]<sup>⊕</sup> calcd for C<sub>31</sub>H<sub>51</sub>NO<sub>6</sub>NaSi<sup>⊕</sup> 584.3377, found 584.3366.



**Methyl (*S*)-2-((*tert*-butoxycarbonyl)amino)-3-(4-(((*R,Z*)-4-((*tert*-butyldimethylsilyl)oxy)-7-phenylhepta-1,4-dien-3-yl)oxy)phenyl)propanoate (**9e**)**

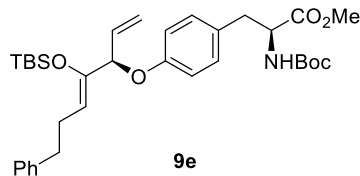

Yellow oil, b:l = 9:1, dr = 96:4, 51 mg, 85% yield.  $[\alpha]_{\text{D}}^{25} +25.7$  (*c* 2.60,  $\text{CHCl}_3$ ).  $^1\text{H NMR}$  (400 MHz,  $\text{CDCl}_3$ )  $\delta$  7.33 – 7.29 (m, 2H), 7.24 – 7.19 (m, 3H), 7.05 (d, *J* = 8.4 Hz, 2H), 6.87 (d, *J* = 8.6 Hz, 2H), 6.07 – 5.90 (m, 1H), 5.36 (d, *J* = 18.9 Hz, 1H), 5.31 (d, *J* = 10.5 Hz, 1H), 5.08 – 4.83 (m, 3H), 4.59 (dd, *J* = 13.6, 6.0 Hz, 1H), 3.74 (s, 3H), 3.15 – 2.96 (m, 2H), 2.78 – 2.61 (m, 2H), 2.44 (dd, *J* = 15.4, 7.3

Hz, 2H), 1.46 (s, 9H), 0.99 (s, 9H), 0.20 (s, 3H), 0.13 (s, 3H);  $^{13}\text{C NMR}$  (151 MHz,  $\text{CDCl}_3$ )  $\delta$  172.54, 157.12, 155.17, 147.96, 142.02, 135.34, 130.20, 128.50, 128.34, 128.20, 125.82, 117.54, 115.96, 110.99, 80.67, 79.95, 54.58, 52.23, 37.61, 35.76, 28.39, 27.00, 26.03, 18.62, -3.65, -3.87; HRMS (ESI):  $[\text{M}+\text{Na}]^{\oplus}$  calcd for  $\text{C}_{34}\text{H}_{49}\text{NO}_6\text{NaSi}^{\oplus}$  618.3221, found 618.3211.

**Methyl (*S*)-2-((*tert*-butoxycarbonyl)amino)-3-(4-(((*R,Z*)-4-((*tert*-butyldimethylsilyl)oxy)-7-(1,3-dioxan-2-yl)hepta-1,4-dien-3-yl)oxy)phenyl)propanoate (**9f**)**

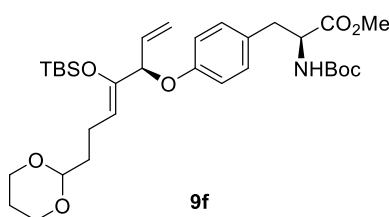

Yellow oil, b:l = 16:1, dr = 96:4, 44 mg, 73% yield.  $[\alpha]_{\text{D}}^{25} +40.4$  (*c* 2.37,  $\text{CHCl}_3$ ).  $^1\text{H NMR}$  (400 MHz,  $\text{CDCl}_3$ )  $\delta$  6.99 (d, *J* = 8.4 Hz, 2H), 6.83 (d, *J* = 8.6 Hz, 2H), 5.94 (ddd, *J* = 16.4, 10.5, 5.6 Hz, 1H), 5.33 (d, *J* = 17.3 Hz, 1H), 5.25 (d, *J* = 10.5 Hz, 1H), 4.95 (d, *J* = 8.1 Hz, 1H), 4.87 – 4.83 (m, 2H), 4.52 (dd, *J* = 13.4, 5.7 Hz, 1H), 4.45 (t, *J* = 5.2 Hz, 1H), 4.07 (dd, *J* = 11.5, 4.0 Hz, 2H), 3.75 – 3.67 (m, 5H), 3.05 – 2.94 (m, 2H), 2.16 (dd, *J* = 14.9, 7.4 Hz, 2H), 2.09 – 2.00 (m, 1H),

1.63 – 1.58 (m, 2H), 1.41 (s, 9H), 1.31 (d, *J* = 13.4 Hz, 1H), 0.94 (s, 9H), 0.16 (s, 3H), 0.09 (s, 3H);  $^{13}\text{C NMR}$  (151 MHz,  $\text{CDCl}_3$ )  $\delta$  172.52, 157.11, 155.17, 147.94, 135.40, 130.18, 128.17, 117.48, 115.96, 111.01, 101.86, 80.69, 79.93, 66.90, 54.57, 52.22, 37.57, 34.95, 28.37, 26.01, 25.92, 19.90, 18.61, -3.72, -3.96; HRMS (ESI):  $[\text{M}+\text{Na}]^{\oplus}$  calcd for  $\text{C}_{32}\text{H}_{51}\text{NO}_8\text{NaSi}^{\oplus}$  628.3276, found 618.3246.

***tert*-Butyl ((*S*)-2-((*tert*-butoxycarbonyl)amino)-3-(4-(((*R*)-2-((*tert*-butyldimethylsilyl)oxy)penta-1,4-dien-3-yl)oxy)phenyl)propanoyl)-*L*-phenylalaninate (**9g**)**

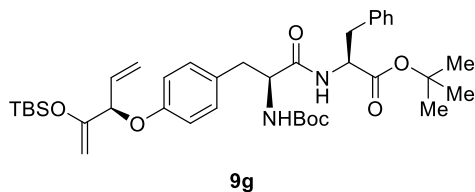

Yellow oil, b:l = 14:1, dr = 96:4, 57 mg, 83% yield.  $[\alpha]_{\text{D}}^{25} +21.7$  (*c* 3.47,  $\text{CHCl}_3$ ).  $^1\text{H NMR}$  (400 MHz,  $\text{CDCl}_3$ )  $\delta$  7.25 – 7.18 (m, 3H), 7.11 – 7.03 (m, 4H), 6.84 (d, *J* = 8.5 Hz, 2H), 6.36 (d, *J* = 5.6 Hz, 1H), 5.95 (ddd, *J* = 16.7, 10.4, 6.0 Hz, 1H), 5.38 (d, *J* = 17.3 Hz, 1H), 5.24 (d, *J* = 10.4 Hz, 1H), 4.93 (br s, 1H), 4.79 (d, *J* = 5.9 Hz, 1H), 4.64 (d, *J* = 5.9 Hz, 1H), 4.43 (s, 1H), 4.29 (br s, 1H), 4.21 (d, *J* = 1.3 Hz, 1H), 3.05 – 2.88 (m, 4H), 1.40 (s, 9H),

1.35 (s, 9H), 0.92 (s, 9H), 0.17 (s, 3H), 0.13 (s, 3H);  $^{13}\text{C NMR}$  (151 MHz,  $\text{CDCl}_3$ )  $\delta$  170.77, 170.11, 157.01, 156.10, 155.35, 136.10, 135.49, 130.27, 129.58, 128.79, 128.39, 126.99, 117.35, 116.12, 90.84, 82.37, 80.13, 80.01, 55.79, 53.74, 38.21, 37.47, 28.31, 27.95, 25.69, 18.12, -4.50, -4.82. HRMS (ESI):  $[\text{M}+\text{Na}]^{\oplus}$  calcd for  $\text{C}_{38}\text{H}_{56}\text{N}_2\text{O}_7\text{NaSi}^{\oplus}$  703.3749, found 703.3770.

**(*8R,9S,13S,14S,17S*)-3-(((*R*)-2-((*tert*-Butyldimethylsilyl)oxy)penta-1,4-dien-3-yl)oxy)-13-methyl-7,8,9,11,12,13,14,15,16,17-decahydro-6*H*-cyclopenta[*a*]phenanthren-17-ol (**9h**)**

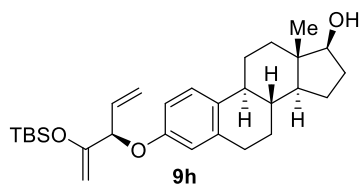

Yellow oil, b:l = 12:1, dr = 97:3, 39 mg, 82% yield.  $[\alpha]_D^{25} +30.6$  ( $c$  1.66,  $\text{CHCl}_3$ ).  $^1\text{H NMR}$  (600 MHz,  $\text{CDCl}_3$ )  $\delta$  7.17 (d,  $J = 8.6$  Hz, 1H), 6.72 (dd,  $J = 8.6, 2.6$  Hz, 1H), 6.65 (d,  $J = 2.5$  Hz, 1H), 5.97 (ddd,  $J = 16.6, 10.5, 5.9$  Hz, 1H), 5.40 (d,  $J = 17.3$  Hz, 1H), 5.25 (d,  $J = 10.5$  Hz, 1H), 4.79 (d,  $J = 5.9$  Hz, 1H), 4.45 (s, 1H), 4.22 (d,  $J = 1.4$  Hz, 1H), 3.73 (t,  $J = 8.5$  Hz, 1H), 2.85 – 2.78 (m, 2H), 2.33 – 2.27 (m,

1H), 2.20 – 2.09 (m, 2H), 1.94 (dt,  $J = 12.4, 3.2$  Hz, 1H), 1.90 – 1.83 (m, 1H), 1.72 – 1.67 (m, 1H), 1.53 – 1.23 (m, 8H), 1.21 – 1.16 (m, 1H), 0.94 (s, 9H), 0.77 (s, 3H), 0.19 (s, 3H), 0.17 (s, 3H);  $^{13}\text{C NMR}$  (101 MHz,  $\text{CDCl}_3$ )  $\delta$  156.38, 155.85, 137.83, 135.74, 132.98, 126.17, 117.17, 116.05, 113.22, 90.60, 81.99, 79.92, 50.12, 44.05, 43.33, 38.86, 36.79, 30.67, 29.84, 27.34, 26.33, 25.74, 23.20, 18.16, 11.14, -4.50, -4.69; HRMS (ESI):  $[\text{M}+\text{H}]^{\oplus}$  calcd for  $\text{C}_{29}\text{H}_{45}\text{O}_3\text{Si}^{\oplus}$  469.3132, found 469.3123.

### 6.3 Scope for the construction of an alpha C-S bond

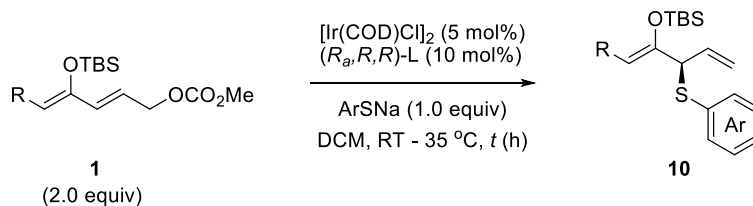

General procedure: To a 4 mL vial containing a magnetic stir bar were added  $[\text{Ir}(\text{COD})\text{Cl}]_2$  (3.2 mg, 0.0050 mmol), ( $R_a,R,R$ )-L (5.6 mg, 0.010 mmol) and THF (0.4 mL) in a nitrogen-filled glovebox. The resulting mixture was stirred at RT for 10 min. After this time, *n*-propylamine (0.2 mL) was added to the reaction. The vial was sealed with a PTFE-lined cap and stirred at 50 °C for 20 min. Next, the volatile materials were evaporated under vacuum. Compound **1** (0.20 mmol) in DCM (1.0 mL) was then added, and the reaction was stirred at RT for 10 min. After this time, LiCl (13 mg, 0.30 mmol) and ArSNa (0.10 mmol) were added to the reaction. The vial was sealed with a PTFE-lined cap and was removed from the glovebox and stirred at RT – 35 °C for 14 – 24 h. After this time, the crude reaction solution was condensed to obtain a  $^1\text{H NMR}$  spectrum (with  $\text{CH}_2\text{Br}_2$  as internal standard). The product was further purified by flash column chromatography eluting with hexane/ethyl acetate to afford pure **10**.

#### (*R*)-*tert*-Butyldimethyl((3-(*p*-tolylthio)penta-1,4-dien-2-yl)oxy)silane (**10a**)

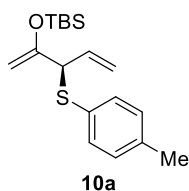

The reaction was run at RT for 14 h. Yellow oil, b:l > 20:1, 23 mg, 73% yield.  $[\alpha]_D^{25} +32.1$  ( $c$  0.81,  $\text{CHCl}_3$ ) for 97% ee.  $^1\text{H NMR}$  (400 MHz, Chloroform-*d*)  $\delta$  7.33 (d,  $J = 8.0$  Hz, 2H), 7.09 (d,  $J = 8.0$  Hz, 2H), 5.99 – 5.90 (m, 1H), 5.17 – 4.93 (m, 2H), 4.14 (d,  $J = 36.9$  Hz, 2H), 4.04 (d,  $J = 8.6$  Hz, 1H), 2.33 (s, 3H), 0.98 (s, 9H), 0.20 (s, 6H);  $^{13}\text{C NMR}$  (151 MHz,  $\text{CDCl}_3$ )  $\delta$  156.51, 137.40, 135.74, 133.37, 131.46,

129.49, 116.41, 91.17, 58.70, 25.77, 21.22, 18.27, -4.62, -4.74; HRMS (ESI):  $[\text{M}+\text{H}]^{\oplus}$  calcd for  $\text{C}_{18}\text{H}_{29}\text{SOSi}^{\oplus}$  321.1703, found 321.1721; HPLC: chiral OD-H column; detected at 220 nm; *n*-hexane/*i*-propanol = 100/0; flow = 0.5 mL/min; Retention time: 15.1 min (minor), 15.6 min (major).

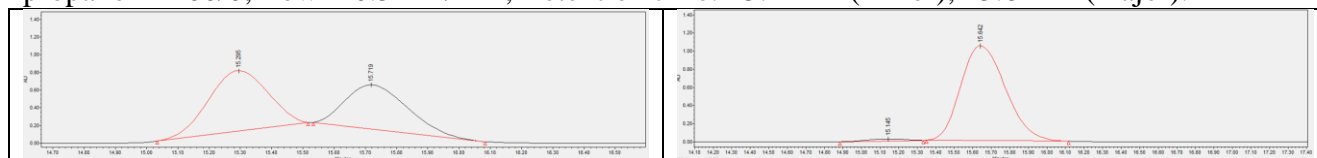



| Name | Retention Time (min) | Area ( $\mu\text{V}\cdot\text{sec}$ ) | % Area | Height ( $\mu\text{V}$ ) | Int Type | Amount | Units | Peak Type | Peak Codes |
|------|----------------------|---------------------------------------|--------|--------------------------|----------|--------|-------|-----------|------------|
| 1    | 15.295               | 8995554                               | 56.50  | 683766                   | bb       |        |       | Unknown   |            |
| 2    | 15.719               | 6925300                               | 43.50  | 500244                   | bb       |        |       | Unknown   |            |

| Name | Retention Time (min) | Area ( $\mu\text{V}\cdot\text{sec}$ ) | % Area | Height ( $\mu\text{V}$ ) | Int Type | Amount | Units | Peak Type | Peak Codes |
|------|----------------------|---------------------------------------|--------|--------------------------|----------|--------|-------|-----------|------------|
| 1    | 15.145               | 290861                                | 1.63   | 21316                    | bb       |        |       | Unknown   |            |
| 2    | 15.642               | 17534181                              | 98.37  | 1047225                  | bb       |        |       | Unknown   |            |

### (*R*)-*tert*-Butyl((3-((4-*tert*-butyl)phenyl)thio)penta-1,4-dien-2-yl)oxydimethylsilane (10b)

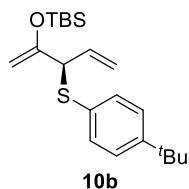

The reaction was run at RT for 24 h. Yellow oil, b:l > 20:1, 29 mg, 81% yield.  $[\alpha]_{\text{D}}^{25} +34.1$  (*c* 1.7,  $\text{CHCl}_3$ ) for 96% ee.  $^1\text{H}$  NMR (400 MHz, Chloroform-*d*)  $\delta$  7.43 – 7.23 (m, 4H), 6.00 – 5.94 (m, 1H), 5.18 – 4.99 (m, 2H), 4.17 (d, *J* = 45.6 Hz, 2H), 4.07 (d, *J* = 8.5 Hz, 1H), 1.30 (s, 9H), 0.97 (s, 9H), 0.19 (s, 6H);  $^{13}\text{C}$  NMR (151 MHz,  $\text{CDCl}_3$ )  $\delta$  156.66, 150.42, 135.87, 132.64, 131.76, 125.72, 116.42, 91.21, 58.33,

34.60, 31.34, 25.78, 18.27, -4.63, -4.76; HRMS (ESI):  $[\text{M}+\text{H}]^{\oplus}$  calcd for  $\text{C}_{21}\text{H}_{35}\text{OSSi}^{\oplus}$  363.2172, found 363.2171; HPLC: chiral OD-H column; detected at 220 nm; *n*-hexane/*i*-propanol = 100/0; flow = 0.3 mL/min; Retention time: 21.0 min (minor), 21.9 min (major).

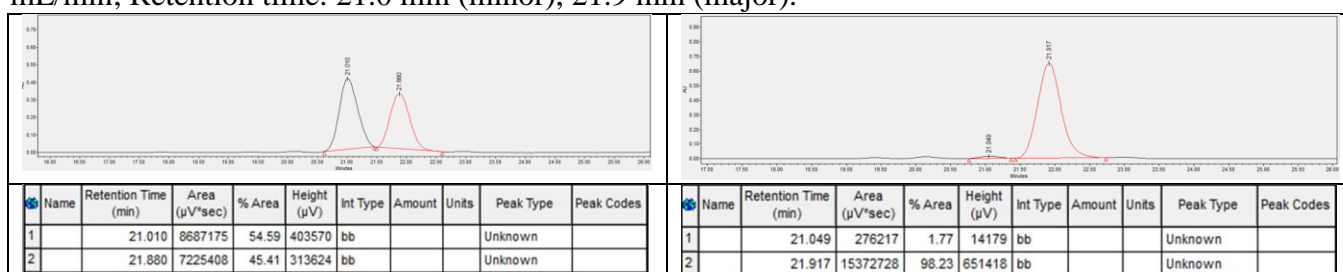

### (*R*)-*tert*-Butyl((3-((3,5-dimethylphenyl)thio)penta-1,4-dien-2-yl)oxydimethylsilane (10c)

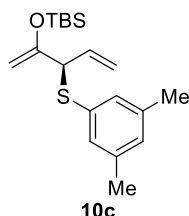

The reaction was run at RT for 24 h. Yellow oil, b:l > 20:1, 27 mg, 81% yield.  $[\alpha]_{\text{D}}^{25} +37.5$  (*c* 0.93,  $\text{CHCl}_3$ ) for 96% ee.  $^1\text{H}$  NMR (400 MHz, Chloroform-*d*)  $\delta$  7.03 (s, 2H), 6.85 (s, 1H), 5.90 – 5.90 (m, 1H), 5.20 – 4.97 (m, 2H), 4.29 – 3.99 (m, 3H), 2.27 (s, 6H), 0.97 (s, 9H), 0.19 (s, 6H);  $^{13}\text{C}$  NMR (151 MHz,  $\text{CDCl}_3$ )  $\delta$  156.57, 138.18, 135.76, 134.75, 130.09, 128.97, 116.45, 91.12, 57.92, 25.76, 21.21, 18.27, -4.64, -4.78.; HRMS (ESI):  $[\text{M}+\text{H}]^{\oplus}$  calcd for  $\text{C}_{19}\text{H}_{31}\text{OSSi}^{\oplus}$  335.1859, found

335.1874; HPLC: chiral OD-H column; detected at 220 nm; *n*-hexane/*i*-propanol = 100/0; flow = 0.5 mL/min; Retention time: 15.0 min (minor), 17.6 min (major).

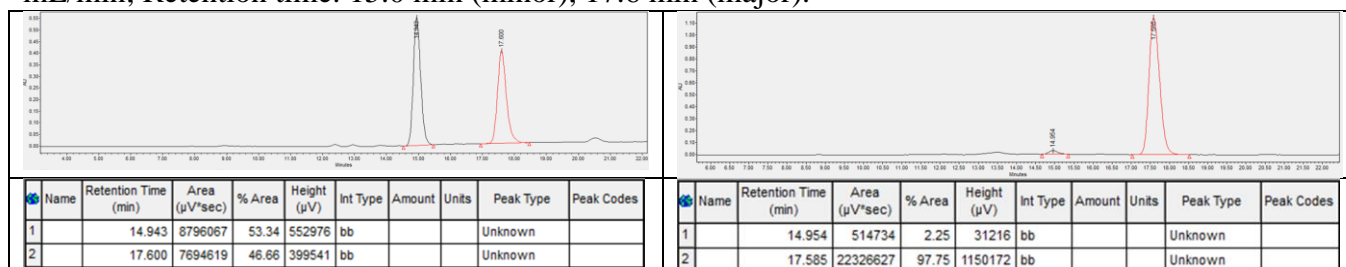

### (*R,Z*)-*tert*-Butyldimethyl((3-(*p*-tolylthio)nona-1,4-dien-4-yl)oxy)silane (10d)

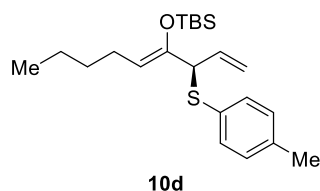

The reaction was run at 35 °C for 18 h. Yellow oil, b:l = 14:1, 23 mg, 61% yield.  $[\alpha]_{\text{D}}^{25} +41.0$  (*c* 1.1,  $\text{CHCl}_3$ ) for 94% ee.  $^1\text{H}$  NMR (600 MHz, Chloroform-*d*)  $\delta$  7.29 (d, *J* = 7.9 Hz, 2H), 7.08 (d, *J* = 7.6 Hz, 2H), 5.88 – 5.82 (m, 1H), 5.05 – 4.94 (m, 2H), 4.67 (t, *J* = 7.0 Hz, 1H), 3.95 (d, *J* = 8.3 Hz, 1H), 2.32 (s, 3H), 2.06 – 1.99 (m, 2H), 1.30

– 1.25 (m, 4H), 0.98 (s, 9H), 0.88 (t,  $J = 6.1$  Hz, 3H), 0.20 (s, 3H), 0.17 (s, 3H);  $^{13}\text{C}$  NMR (151 MHz,  $\text{CDCl}_3$ )  $\delta$  147.43, 137.35, 136.30, 133.33, 131.36, 129.44, 116.00, 111.70, 57.71, 31.84, 26.01, 25.36, 22.52, 21.21, 18.55, 14.10, -3.60, -3.65; (ESI):  $[\text{M}+\text{Na}]^{\oplus}$  calcd for  $\text{C}_{22}\text{H}_{36}\text{OSNaSi}^{\oplus}$  399.2148, found 399.2141; HPLC: chiral OD-H column; detected at 220 nm;  $n$ -hexane/ $i$ -propanol = 100/0; flow = 0.5 mL/min; Retention time: 12.1 min (minor), 13.1 min (major).

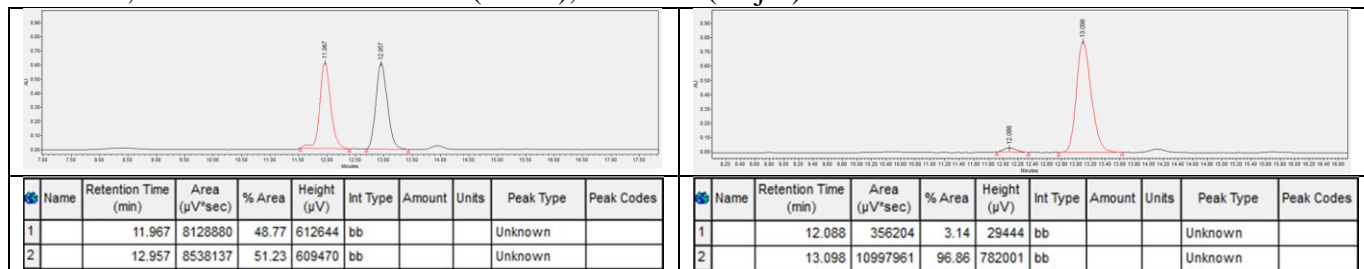

**(*R,Z*)-*tert*-Butyldimethyl((8-methyl-3-(*p*-tolylthio)nona-1,4-dien-4-yl)oxy)silane (10e)**

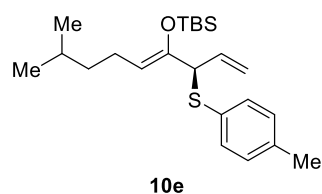

The reaction was run at 35 °C for 16 h. Colorless oil, b:l = 15:1, 26 mg, 66% yield.  $[\alpha]_{\text{D}}^{25} +37.6$  ( $c$  1.4,  $\text{CHCl}_3$ ) for 94% ee.  $^1\text{H}$  NMR (600 MHz, Chloroform- $d$ )  $\delta$  7.29 (d,  $J = 7.9$  Hz, 2H), 7.08 (d,  $J = 7.8$  Hz, 2H), 5.88 – 5.82(m, 1H), 5.06 – 4.91 (m, 2H), 4.64 (t,  $J = 7.0$  Hz, 1H), 3.95 (d,  $J = 8.4$  Hz, 1H), 2.32 (s, 3H), 2.07 – 1.98 (m, 2H), 1.53 – 1.49 (m, 1H), 1.17 (q,  $J = 7.5$  Hz, 2H), 0.99 (s, 9H), 0.87 (d,  $J = 6.6$

Hz, 6H), 0.20 (s, 3H), 0.18 (s, 3H);  $^{13}\text{C}$  NMR (151 MHz,  $\text{CDCl}_3$ )  $\delta$  147.32, 137.35, 136.32, 133.35, 131.37, 129.44, 115.98, 111.84, 57.69, 38.80, 27.88, 26.02, 23.62, 22.65, 22.60, 21.21, 18.55, -3.58, -3.64; HRMS (ESI):  $[\text{M}+\text{H}]^{\oplus}$  calcd for  $\text{C}_{23}\text{H}_{39}\text{OSSi}^{\oplus}$  391.2485, found 391.2471; HPLC: two chiral OD-H columns were connected to each other; detected at 220 nm;  $n$ -hexane/ $i$ -propanol = 100/0; flow = 0.3 mL/min; Retention time: 47.9 min (major), 50.9 min (minor).

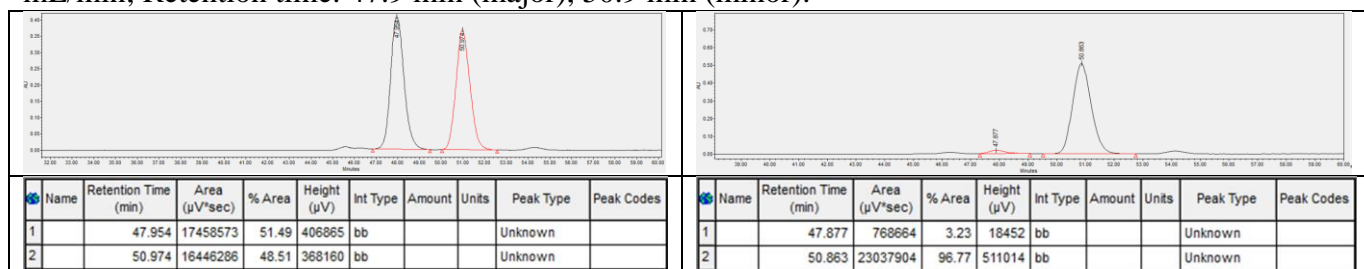

**(*R,Z*)-*tert*-Butyl((7-cyclohexyl-3-(*p*-tolylthio)hepta-1,4-dien-4-yl)oxy)dimethylsilane (10f)**

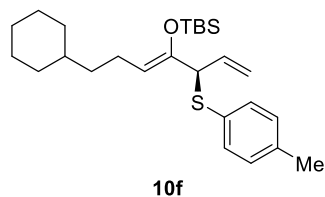

The reaction was run at 35 °C for 16 h. Colorless oil, b:l > 20:1, 27 mg, 62% yield.  $[\alpha]_{\text{D}}^{25} +33.9$  ( $c$  1.4,  $\text{CHCl}_3$ ) for 94% ee.  $^1\text{H}$  NMR (600 MHz, Chloroform- $d$ )  $\delta$  7.29 (d,  $J = 7.9$  Hz, 2H), 7.08 (d,  $J = 7.7$  Hz, 2H), 5.88 – 5.82 (m, 1H), 5.03 – 4.94 (m, 2H), 4.65 (t,  $J = 7.0$  Hz, 1H), 3.95 (d,  $J = 8.4$  Hz, 1H), 2.32 (s, 3H), 2.06 – 1.99 (m, 2H), 1.69 – 1.63 (m, 5H), 1.24 – 1.12 (m, 6H), 0.98 (s, 9H), 0.85 (q,  $J = 10.7$ ,

10.2 Hz, 2H), 0.19 (s, 3H), 0.17 (s, 3H);  $^{13}\text{C}$  NMR (151 MHz,  $\text{CDCl}_3$ )  $\delta$  147.26, 137.33, 136.32, 133.31, 131.42, 129.45, 115.98, 111.97, 57.70, 37.56, 37.37, 33.39, 33.36, 26.81, 26.47, 26.03, 23.10, 21.21, 18.55, -3.58, -3.62 (one  $\text{CH}_2$  carbon signal was not observed because of overlapping); HRMS (ESI):  $[\text{M}+\text{H}]^{\oplus}$  calcd for  $\text{C}_{26}\text{H}_{43}\text{OSSi}^{\oplus}$  431.2798, found 431.2795; HPLC: chiral OD-H column; detected at

220 nm; *n*-hexane/*i*-propanol = 100/0; flow = 0.3 mL/min; Retention time: 19.8 min (minor), 20.9 min (major).

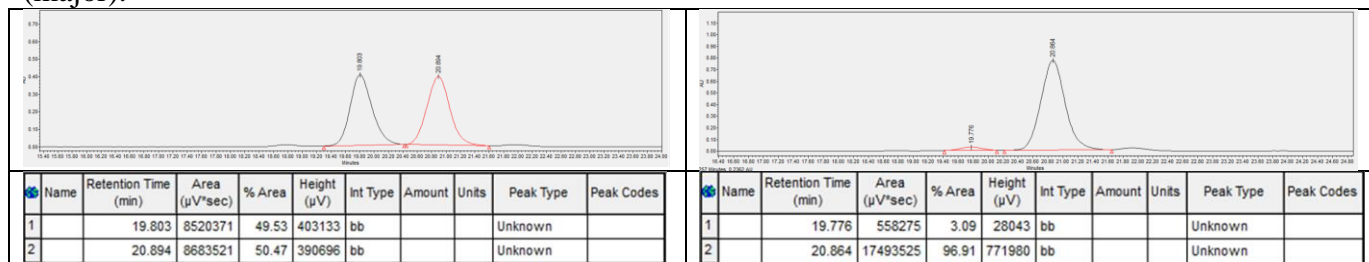

### (*R,Z*)-*tert*-Butyldimethyl((7-phenyl-3-(*p*-tolylthio)hepta-1,4-dien-4-yl)oxy)silane (10g)

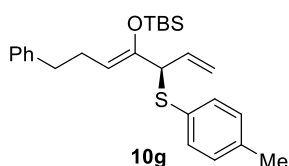

The reaction was run at 35 °C for 20 h. Yellow oil, b:l = 16:1, 29 mg, 69% yield.  $[\alpha]_D^{25} +25.8$  (*c* 1.2, CHCl<sub>3</sub>) for 95% ee; <sup>1</sup>H NMR (600 MHz, Chloroform-*d*) δ 7.30 – 7.26 (m, 4H), 7.20 – 7.15 (m, 3H), 7.09 (d, *J* = 7.3 Hz, 2H), 5.87 – 5.81 (m, 1H), 5.05 – 4.94 (m, 2H), 4.73 (t, *J* = 6.9 Hz, 1H), 3.96 (d, *J* = 8.3 Hz, 1H), 2.65 – 2.53 (m, 2H), 2.39 – 2.30 (m, 5H), 0.99 (s, 9H), 0.20 (s, 3H), 0.17 (s, 3H); <sup>13</sup>C NMR (151 MHz, CDCl<sub>3</sub>) δ 148.07, 142.22, 137.45, 136.17, 133.41, 131.25, 129.47, 128.49, 128.34, 125.79, 116.13, 110.60, 57.59, 35.89, 27.47, 26.02, 21.22, 18.54, -3.54, -3.59; HRMS (ESI): [M+Na]<sup>+</sup> calcd for C<sub>26</sub>H<sub>36</sub>OSNaSi<sup>+</sup> 447.2148, found 447.2150; HPLC: chiral OD-H column; detected at 220 nm; *n*-hexane/*i*-propanol = 100/0; flow = 0.5 mL/min; Retention time: 20.3 min (minor), 24.1 min (major).

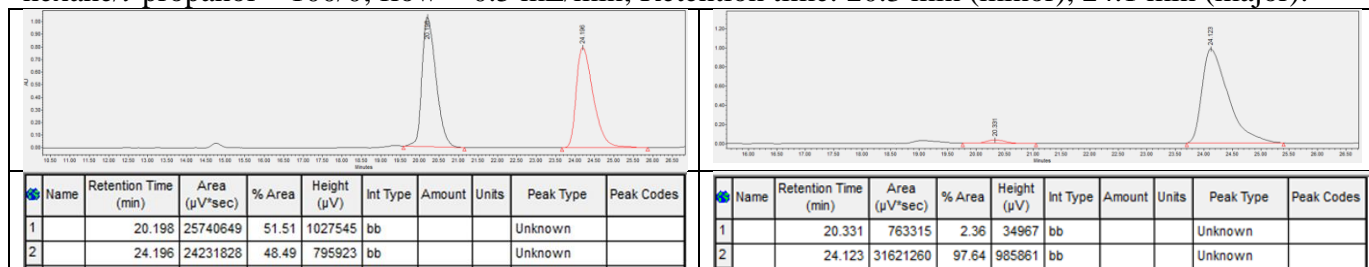

### (*R,Z*)-*tert*-Butyldimethyl((3-(*p*-tolylthio)nona-1,4,8-trien-4-yl)oxy)silane (10h)

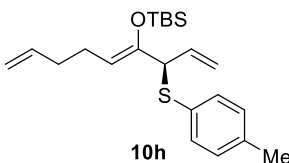

The reaction was run at 35 °C for 14 h. Yellow oil, b:l = 14:1, 30 mg, 81% yield.  $[\alpha]_D^{25} +26.7$  (*c* 1.9, CHCl<sub>3</sub>) for 94% ee. <sup>1</sup>H NMR (600 MHz, Chloroform-*d*) δ 7.29 (d, *J* = 7.9 Hz, 2H), 7.08 (d, *J* = 7.7 Hz, 2H), 5.91 – 5.73 (m, 2H), 5.01 – 4.94 (m, 4H), 4.69 (t, *J* = 6.8 Hz, 1H), 3.95 (d, *J* = 8.4 Hz, 1H), 2.32 (s, 3H), 2.17 – 2.01 (m, 4H), 0.98 (s, 9H), 0.20 (s, 3H), 0.17 (s, 3H); <sup>13</sup>C NMR (151 MHz, CDCl<sub>3</sub>) δ 147.96, 138.51, 137.42, 136.21, 133.37, 131.30, 129.46, 116.10, 114.62, 110.65, 57.64, 33.70, 26.00, 25.04, 21.21, 18.54, -3.55, -3.62; HRMS (ESI): [M+H]<sup>+</sup> calcd for C<sub>22</sub>H<sub>35</sub>OSSi<sup>+</sup> 375.2172, found 375.2187; HPLC: chiral OD-H column; detected at 220 nm; *n*-hexane/*i*-propanol = 100/0; flow = 0.5 mL/min; Retention time: 12.5 min (minor), 13.6 min (major).

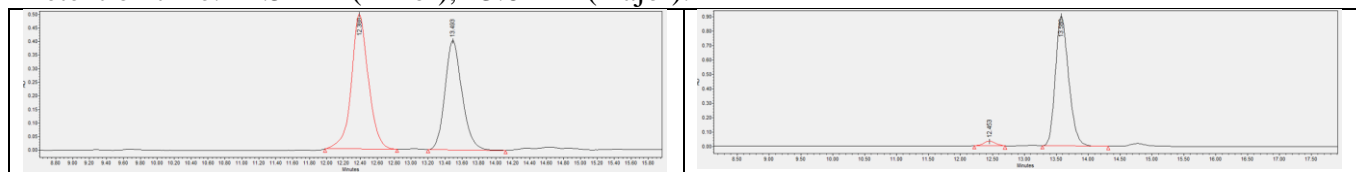

| Name | Retention Time (min) | Area ( $\mu\text{V}^2\text{sec}$ ) | % Area | Height ( $\mu\text{V}$ ) | Int Type | Amount | Units | Peak Type | Peak Codes |
|------|----------------------|------------------------------------|--------|--------------------------|----------|--------|-------|-----------|------------|
| 1    | 12.388               | 6935012                            | 55.14  | 496034                   | bb       |        |       | Unknown   |            |
| 2    | 13.493               | 5642669                            | 44.86  | 402276                   | bb       |        |       | Unknown   |            |

| Name | Retention Time (min) | Area ( $\mu\text{V}^2\text{sec}$ ) | % Area | Height ( $\mu\text{V}$ ) | Int Type | Amount | Units | Peak Type | Peak Codes |
|------|----------------------|------------------------------------|--------|--------------------------|----------|--------|-------|-----------|------------|
| 1    | 12.453               | 408262                             | 3.03   | 32151                    | bb       |        |       | Unknown   |            |
| 2    | 13.580               | 13050697                           | 96.97  | 905360                   | bb       |        |       | Unknown   |            |

### (*R,Z*)-*tert*-Butyl((9-fluoro-3-(*p*-tolylthio)nona-1,4-dien-4-yl)oxy)dimethylsilane (**10i**)

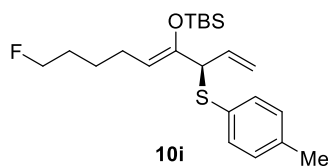

The reaction was run at 35 °C for 14 h. Yellow oil, b:l > 20:1, 32 mg, 80% yield.  $[\alpha]_D^{25} +26.6$  ( $c$  1.9,  $\text{CHCl}_3$ ) for 95% ee.  $^1\text{H}$  NMR (600 MHz, Chloroform- $d$ )  $\delta$  7.29 (d,  $J$  = 6.9 Hz, 2H), 7.08 (d,  $J$  = 7.1 Hz, 2H), 5.88 – 5.82 (m, 1H), 5.06 – 4.94 (m, 2H), 4.66 (t,  $J$  = 6.6 Hz, 1H), 4.45 (t,  $J$  = 5.6 Hz, 1H), 4.38 (t,  $J$  = 5.6 Hz, 1H), 3.96 (d,  $J$  = 8.2 Hz, 1H), 2.32 (s, 3H), 2.12 – 2.03 (m, 2H), 1.68 – 1.60 (m, 2H), 1.43 – 1.39 (m, 2H), 0.99 (s, 9H), 0.20 (s, 3H), 0.17 (s, 3H);  $^{13}\text{C}$  NMR (151 MHz,  $\text{CDCl}_3$ )  $\delta$  148.16, 137.44, 136.18, 133.34, 131.24, 129.47, 116.15, 110.80, 84.09 ( $J_{\text{C-F}}$  = 164.3 Hz), 57.55, 30.06 ( $J_{\text{C-F}}$  = 19.5 Hz), 25.98, 25.16 ( $J_{\text{C-F}}$  = 5.3 Hz), 25.07, 21.19, 18.53, -3.56, -3.64;  $^{19}\text{F}$  NMR (376 MHz, Chloroform- $d$ )  $\delta$  -217.21 – -217.59 (m, 1F); HRMS (ESI):  $[\text{M}+\text{Na}]^{\oplus}$  calcd for  $\text{C}_{22}\text{H}_{35}\text{FOSNaSi}^{\oplus}$  417.2054, found 417.2050; HPLC: chiral OD-H column; detected at 220 nm; *n*-hexane/*i*-propanol = 100/0; flow = 0.5 mL/min; Retention time: 18.0 min (minor), 27.2 min (major).

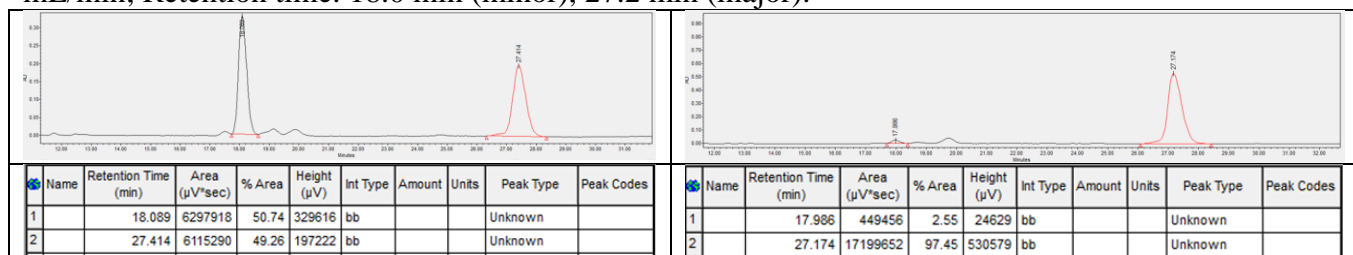

## 6.4 Scope for the construction of $\alpha$ C-C bond

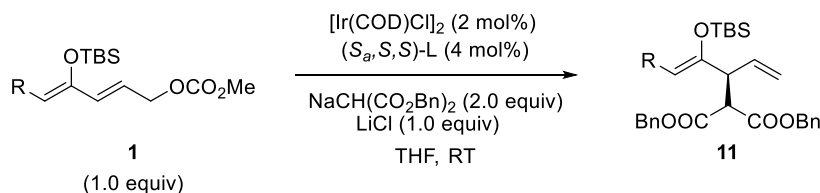

General procedure: To a 4 mL vial containing a magnetic stir bar were added  $[\text{Ir}(\text{COD})\text{Cl}]_2$  (1.3 mg, 0.0020 mmol), (*R<sub>a</sub>,R,R*)-*L* (2.2 mg, 0.0040 mmol) and THF (0.2 mL) in a nitrogen-filled glovebox. The resulting mixture was stirred at RT for 10 min. After this time, *n*-propylamine (0.1 mL) was added to the reaction. The vial was sealed with a PTFE-lined cap and stirred at 50 °C for 20 min. After this time, the volatile materials were evaporated under vacuum. Compound **1** (0.10 mmol) in THF (0.2 mL) was added, and the reaction was stirred at RT for 10 min. After this time, LiCl (4.2 mg, 0.1 mmol) and  $\text{NaCH}(\text{CO}_2\text{Bn})_2$  (0.20 mmol) were added to the reaction. The vial was sealed with a PTFE-lined cap and was removed from the glovebox and stirred at room temperature for 12 – 20 h. After this time, the crude reaction solution was condensed to obtain a  $^1\text{H}$  NMR spectrum (with  $\text{CH}_2\text{Br}_2$  as internal standard). The product was further purified by flash column chromatography using hexane/ethyl acetate eluent to afford pure **11**.

### Dibenzyl (*S*)-2-(2-((*tert*-butyldimethylsilyl)oxy)penta-1,4-dien-3-yl)malonate (**11a**)



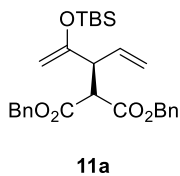

The reaction was run at RT for 20 h. Yellow oil, b:l > 20:1, 42 mg, 87% yield.  $[\alpha]_D^{25}$  -8.0 (*c* 2.08, CHCl<sub>3</sub>) for 94% ee. <sup>1</sup>H NMR (600 MHz, CDCl<sub>3</sub>) δ 7.42 – 7.26 (m, 10H), 5.84 (dt, *J* = 17.3, 9.6 Hz, 1H), 5.14 – 5.07 (m, 5H), 5.02 (d, *J* = 10.2 Hz, 1H), 4.13 (d, *J* = 0.9 Hz, 1H), 4.00 (s, 1H), 3.85 (d, *J* = 10.4 Hz, 1H), 3.52 (t, *J* = 9.6 Hz, 1H), 0.90 (s, 9H), 0.13 (s, 3H), 0.11 (s, 3H); <sup>13</sup>C NMR (151 MHz, CDCl<sub>3</sub>)

δ 167.62 (CO), 167.46 (CO), 156.70 (O-C=), 135.45 (quaternary carbon of Ph), 135.42 (quaternary carbon of Ph), 135.36 (CH=), 128.53 (CH of Ph), 128.51 (CH of Ph), 128.39 (CH of Ph), 128.36 (CH of Ph), 128.34 (CH of Ph), 128.30 (CH of Ph), 117.82 (CH<sub>2</sub>=), 90.71 (CH<sub>2</sub>=), 67.15 (O-CH<sub>2</sub>), 67.13 (O-CH<sub>2</sub>), 54.46 (CH), 50.95 (CH), 25.73 ((CH<sub>3</sub>)<sub>3</sub>), 18.17 (Si-C), -4.83 (CH<sub>3</sub>), -4.94 (CH<sub>3</sub>); HRMS (ESI): [M+Na]<sup>+</sup> calcd for C<sub>18</sub>H<sub>36</sub>O<sub>5</sub>NaSi<sup>+</sup> 503.2224, found 503.2226; HPLC: chiral AD-H column; detected at 220 nm; *n*-hexane/*i*-propanol = 94/6; flow = 1.0 mL/min; Retention time: 11.1 min (major), 12.8 min (minor).

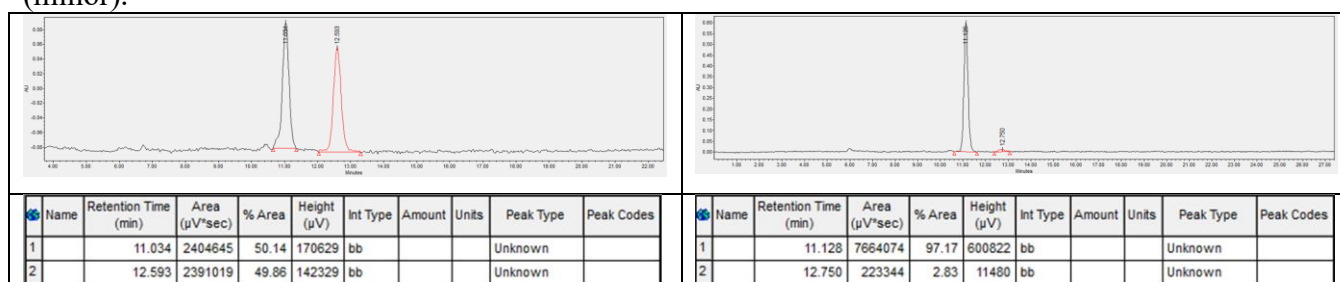

### Dibenzyl (*S,Z*)-2-(4-((*tert*-butyldimethylsilyloxy)nona-1,4-dien-3-yl)malonate (11b)

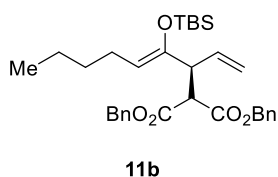

The reaction was run at RT for 14 h. Yellow oil, b:l > 20:1, 50 mg, 93% yield.  $[\alpha]_D^{25}$  -25.1 (*c* 3.38, CHCl<sub>3</sub>) for 94% ee. <sup>1</sup>H NMR (600 MHz, CDCl<sub>3</sub>) δ 7.39 – 7.26 (m, 10H), 5.82 (ddd, *J* = 17.1, 10.1, 8.9 Hz, 1H), 5.19 – 5.00 (m, 6H), 4.46 (t, *J* = 7.0 Hz, 1H), 3.82 (d, *J* = 9.5 Hz, 1H), 3.44 (t, *J* = 9.1 Hz, 1H), 1.97 – 1.85 (m, 2H), 1.28 – 1.17 (m, 4H), 0.93 (s, 9H), 0.85 (t, *J* = 7.2 Hz, 3H), 0.14 (s, 3H), 0.11 (s, 3H);

<sup>13</sup>C NMR (151 MHz, CDCl<sub>3</sub>) δ 167.70 (CO), 167.50 (CO), 148.23 (O-C=), 135.80 (CH=), 135.51 (quaternary carbon of Ph), 135.50 (quaternary carbon of Ph), 128.53 (two peaks are overlapped, CH of Ph), 128.30 (CH of Ph), 128.28 (two peaks are overlapped, CH of Ph), 128.22 (CH of Ph), 117.96 (CH<sub>2</sub>=), 109.69 (CH=), 67.15, 67.01, 54.92, 50.29, 31.90, 25.95, 25.21, 22.46, 18.44, 14.04, -3.70, -3.87; HRMS (ESI): [M+Na]<sup>+</sup> calcd for C<sub>32</sub>H<sub>44</sub>O<sub>5</sub>NaSi<sup>+</sup> 559.2850, found 559.2844; HPLC: two chiral AD-H columns were connected to each other; detected at 220 nm; *n*-hexane/*i*-propanol = 99.5/0.5; flow = 0.4 mL/min; Retention time: 42.1 min (major), 45.5 min (minor).

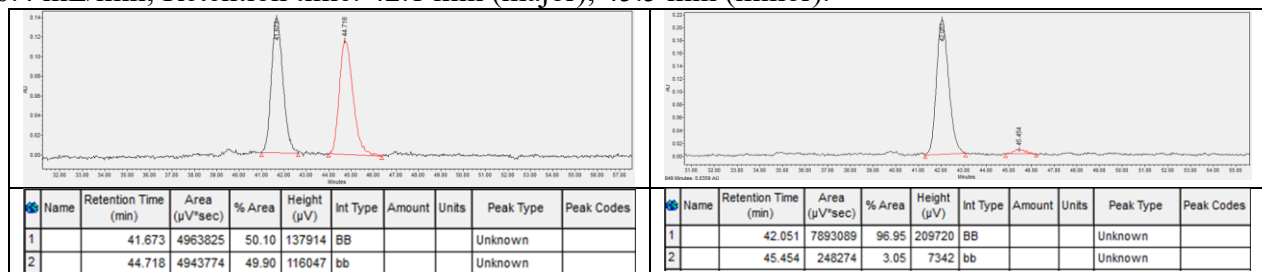

### Dibenzyl (*S,Z*)-2-(4-((*tert*-butyldimethylsilyloxy)-8-methylnona-1,4-dien-3-yl)malonate (11c)

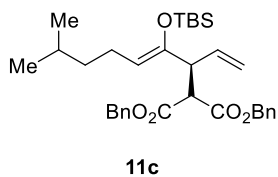

The reaction was run at RT for 20 h. Yellow oil, b:l > 20:1, 49 mg, 88% yield.  $[\alpha]_D^{25}$  -26.0 (*c* 3.26, CHCl<sub>3</sub>) for 93% ee. <sup>1</sup>H NMR (400 MHz, CDCl<sub>3</sub>) δ 7.41 – 7.26 (m, 10H), 5.82 (ddd, *J* = 17.1, 10.0, 8.9 Hz, 1H), 5.19 – 4.99 (m, 6H), 4.44 (t, *J* = 7.0 Hz, 1H), 3.82 (d, *J* = 9.5 Hz, 1H), 3.43 (t, *J* = 9.1 Hz, 1H), 1.98 – 1.84 (m, 2H), 1.54 – 1.44 (m, 1H), 1.09 (dd, *J* = 14.9, 7.3 Hz, 2H), 0.93 (s, 9H), 0.83 (d, *J* = 6.6 Hz, 6H), 0.15 (s, 3H), 0.11 (s, 3H); <sup>13</sup>C NMR (151 MHz, CDCl<sub>3</sub>) δ 167.71 (CO), 167.50 (CO), 148.09 (O-C=), 135.77 (CH=), 135.50, 135.49, 128.54 (two peaks are overlapped, CH of Ph), 128.32 (CH of Ph), 128.28 (two peaks are overlapped, CH of Ph), 128.21 (CH of Ph), 117.99 (CH<sub>2</sub>=), 109.82 (CH=), 67.15, 67.01, 54.88, 50.26, 38.85, 27.88, 25.95, 23.50, 22.59, 18.43, -3.70, -3.88; HRMS (ESI): [M+Na]<sup>⊕</sup> calcd for C<sub>33</sub>H<sub>46</sub>O<sub>5</sub>NaSi<sup>⊕</sup> 573.3006, found 573.3004; HPLC: two chiral AD-H columns were connected to each other; detected at 220 nm; *n*-hexane/*i*-propanol = 99.5/0.5; flow = 0.4 mL/min; Retention time: 45.6 min (major), 48.5 min (minor).

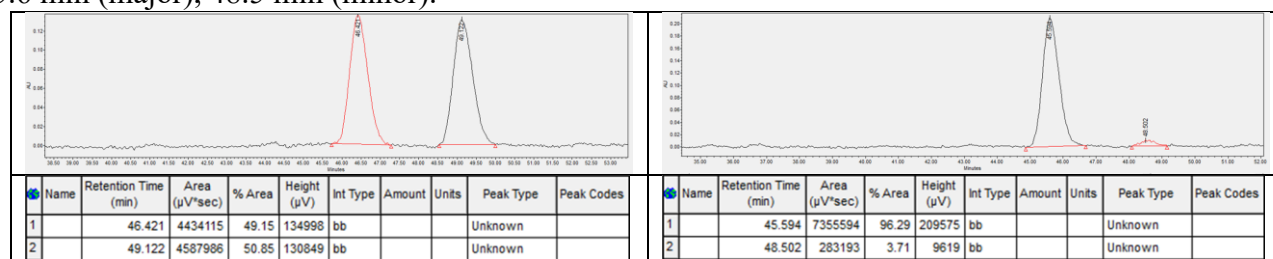

### Dibenzyl (*S,Z*)-2-(4-((*tert*-butyldimethylsilyloxy)-7-cyclohexylhepta-1,4-dien-3-yl)malonate (11d)

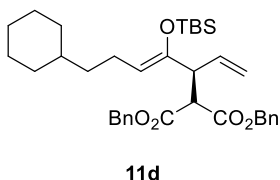

The reaction was run RT for 14 h. Yellow oil, b:l > 20:1, 51 mg, 87% yield.  $[\alpha]_D^{25}$  -24.5 (*c* 3.38, CHCl<sub>3</sub>) for 94% ee. <sup>1</sup>H NMR (600 MHz, CDCl<sub>3</sub>) δ 7.43 – 7.26 (m, 10H), 5.81 (ddd, *J* = 17.1, 10.0, 8.9 Hz, 1H), 5.17 – 5.01 (m, 6H), 4.44 (t, *J* = 7.0 Hz, 1H), 3.82 (d, *J* = 9.6 Hz, 1H), 3.43 (t, *J* = 9.1 Hz, 1H), 1.97 – 1.86 (m, 2H), 1.69 – 1.61 (m, 5H), 1.23 – 1.08 (m, 6H), 0.93 (s, 9H), 0.85 – 0.79 (m, 2H), 0.14 (s, 3H), 0.11 (s, 3H); <sup>13</sup>C NMR (151 MHz, CDCl<sub>3</sub>) δ 167.69 (CO), 167.51 (CO), 148.03 (O-C=), 135.82 (CH=), 135.51 (two peaks are overlapped, quaternary carbon of Ph), 128.54 (two peaks are overlapped, CH of Ph), 128.31 (CH of Ph), 128.29 (CH of Ph), 128.28 (CH of Ph), 128.22 (CH of Ph), 117.95 (CH<sub>2</sub>=), 109.94 (CH=), 67.15, 67.02, 54.91, 50.26, 37.57, 37.46, 33.37, 33.32, 26.78, 26.47, 25.96, 23.00, 18.44, -3.67, -3.86 (one more CH<sub>2</sub> aliphatic carbon signal of the cyclohexyl unit was observed because of the asymmetric environment around the cyclohexyl unit); HRMS (ESI): [M+Na]<sup>⊕</sup> calcd for C<sub>36</sub>H<sub>50</sub>O<sub>5</sub>NaSi<sup>⊕</sup> 613.3319, found 613.3289; HPLC: two chiral AD-H columns were connected to each other; detected at 220 nm; *n*-hexane/*i*-propanol = 99.5/0.5; flow = 0.4 mL/min; Retention time: 40.8 min (major), 42.9 min (minor).

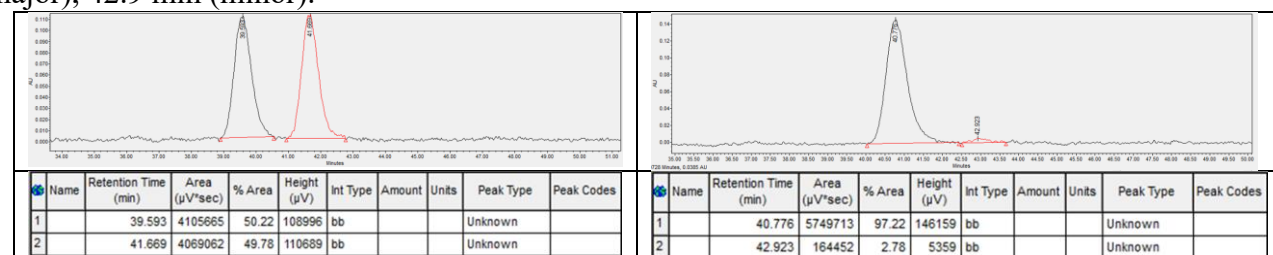

### Dibenzyl (*S,Z*)-2-(4-((*tert*-butyldimethylsilyloxy)-7-phenylhepta-1,4-dien-3-yl)malonate (11e)

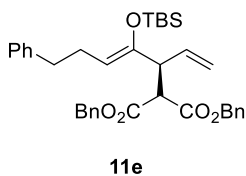

The reaction was run at RT for 14 h. Yellow oil, b:l > 20:1, 54 mg, 92% yield.  $[\alpha]_D^{25}$  -28.8 (*c* 3.60, CHCl<sub>3</sub>) for 95% ee. <sup>1</sup>H NMR (400 MHz, CDCl<sub>3</sub>) δ 7.35 – 7.22 (m, 12H), 7.20 – 7.09 (m, 3H), 5.88 – 5.74 (m, 1H), 5.17 – 5.00 (m, 6H), 4.52 (t, *J* = 7.0 Hz, 1H), 3.81 (d, *J* = 9.6 Hz, 1H), 3.45 (t, *J* = 9.2 Hz, 1H), 2.50 (t, *J* = 7.9 Hz, 2H), 2.32 – 2.17 (m, 2H), 0.93 (s, 9H), 0.15 (s, 3H), 0.11 (s, 3H); <sup>13</sup>C NMR (151

MHz, CDCl<sub>3</sub>) δ 167.64 (CO), 167.46 (CO), 148.90 (O-C=), 142.15 (quaternary carbon of terminal Ph), 135.66 (CH=), 135.50 (two peaks are overlapped, quaternary carbon of Bn), 128.57 (CH of Bn), 128.56 (CH of Bn), 128.43 (CH of terminal Ph), 128.35 (CH of Bn), 128.33 (two peaks are overlapped, CH of Bn), 128.32 (CH of Bn), 128.25 (CH of terminal Ph), 125.77 (CH of terminal Ph), 118.11 (CH<sub>2</sub>=), 108.63 (CH=), 67.19, 67.06, 54.92, 50.19, 35.91, 27.24, 25.96, 18.44, -3.63, -3.82; HRMS (ESI):  $[M+Na]^+$  calcd for C<sub>36</sub>H<sub>44</sub>O<sub>5</sub>NaSi<sup>+</sup> 607.2850, found 607.2846; HPLC: two chiral OD-H columns were connected to each other; detected at 220 nm; *n*-hexane/*i*-propanol = 94/6; flow = 0.5 mL/min; Retention time: 26.0 min (minor), 27.2 min (major).

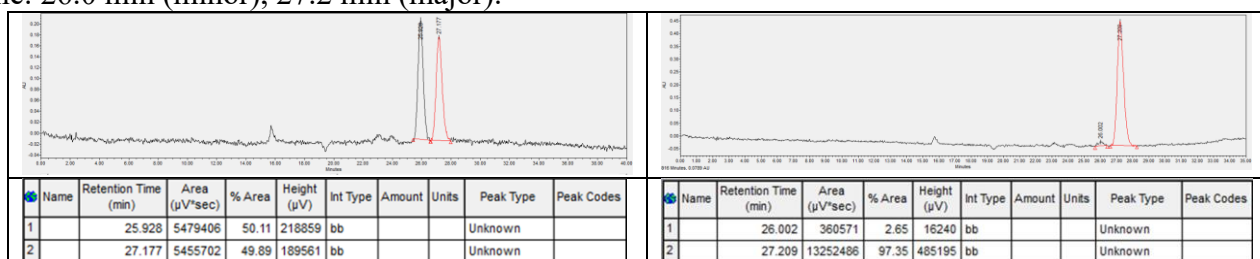

### Dibenzyl (*S,Z*)-2-(4-((*tert*-butyldimethylsilyl)oxy)nona-1,4,8-trien-3-yl)malonate (11f)

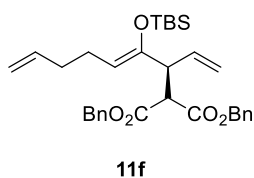

The reaction was run at RT for 20 h. Yellow oil, b:l > 20:1, 48 mg, 90% yield.  $[\alpha]_D^{25}$  -28.8 (*c* 2.95, CHCl<sub>3</sub>) for 95% ee. <sup>1</sup>H NMR (400 MHz, CDCl<sub>3</sub>) δ 7.35 – 7.27 (m, 10H), 5.90 – 5.68 (m, 2H), 5.19 – 4.91 (m, 8H), 4.55 – 4.41 (m, 1H), 3.82 (d, *J* = 9.6 Hz, 1H), 3.45 (t, *J* = 9.1 Hz, 1H), 2.42 – 1.67 (m, 4H), 0.94 (s, 9H), 0.16 (s, 3H), 0.13 (s, 3H); <sup>13</sup>C NMR (151 MHz, CDCl<sub>3</sub>) δ 167.64 (CO), 167.46 (CO),

148.75 (O-C=), 138.44 (CH=), 135.70 (CH=), 135.48 (two peaks are overlapped, quaternary carbon of Ph), 128.54 (two peaks are overlapped, CH of Ph), 128.33 (CH of Ph), 128.31 (two peaks are overlapped, CH of Ph), 128.23 (CH of Ph), 118.07 (CH<sub>2</sub>=), 114.57 (CH<sub>2</sub>=), 108.66 (CH=), 67.18, 67.05, 54.91, 50.20, 33.73, 25.94, 24.83, 18.42, -3.67, -3.85; HRMS (ESI):  $[M+Na]^+$  calcd for C<sub>32</sub>H<sub>42</sub>O<sub>5</sub>NaSi<sup>+</sup> 557.2693, found 557.2694; HPLC: two chiral AD-H columns were connected to each other; detected at 220 nm; *n*-hexane/*i*-propanol = 99.5/0.5; flow = 0.4 mL/min; Retention time: 48.3 min (major), 50.8 min (minor).

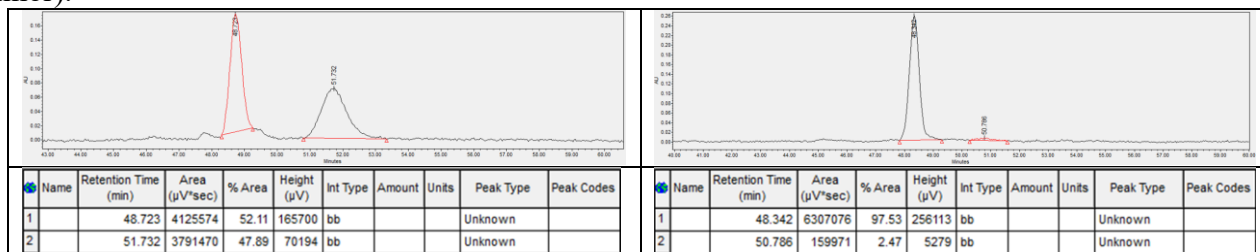

### Dibenzyl (*S,Z*)-2-(4-((*tert*-butyldimethylsilyl)oxy)-9-fluoronona-1,4-dien-3-yl)malonate (11g)

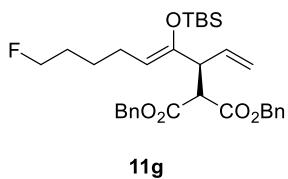

The reaction was run at RT for 20 h. Yellow oil, b:l > 20:1, 45 mg, 82% yield.  $[\alpha]_D^{25}$  -24.8 (*c* 2.97, CHCl<sub>3</sub>) for 92% ee. <sup>1</sup>H NMR (400 MHz, CDCl<sub>3</sub>) δ 7.45 – 7.26 (m, 10H), 5.91 – 5.74 (m, 1H), 5.18 – 5.02 (m, 6H), 4.52 – 4.39 (m, 2H), 4.32 (t, *J* = 6.2 Hz, 1H), 3.82 (d, *J* = 9.4 Hz, 1H), 3.44 (t, *J* = 9.0 Hz, 1H), 2.01 – 1.906 (m, 2H), 1.71 – 1.56 (m, 2H), 1.36 – 1.28 (m, 2H), 0.93 (s, 9H), 0.15 (s, 3H), 0.11 (s, 3H); <sup>13</sup>C NMR (151 MHz, CDCl<sub>3</sub>) δ 167.67 (CO), 167.44 (CO), 148.92 (O-C=), 135.62 (CH=), 135.47 (quaternary carbon of Ph), 135.46 (quaternary carbon of Ph), 128.54 (two peaks are overlapped, CH of Ph), 128.34 (CH of Ph), 128.31 (two peaks are overlapped, CH of Ph), 128.23 (CH of Ph), 118.13 (CH<sub>2</sub>=), 108.92 (CH=), 84.03 (d, *J*<sub>CF</sub> = 164.1 Hz), 67.19, 67.05, 54.83, 50.20, 30.00 (d, *J*<sub>CF</sub> = 19.6 Hz, 1H), 25.92, 25.20 (d, *J*<sub>CF</sub> = 5.4 Hz, 1H), 24.93, 18.42, -3.70, -3.88; <sup>19</sup>F NMR (376 MHz, CDCl<sub>3</sub>) δ -215.05 – -218.63 (m, 1F); HRMS (ESI): [M+Na]<sup>+</sup> calcd for C<sub>32</sub>H<sub>43</sub>O<sub>5</sub>NaFSi<sup>+</sup> 577.2756, found 577.2736; HPLC: two chiral OD-H columns were connected to each other; detected at 220 nm; *n*-hexane/*i*-propanol = 94/6; flow = 0.5 mL/min; Retention time: 23.0 min (minor), 23.7 min (major).

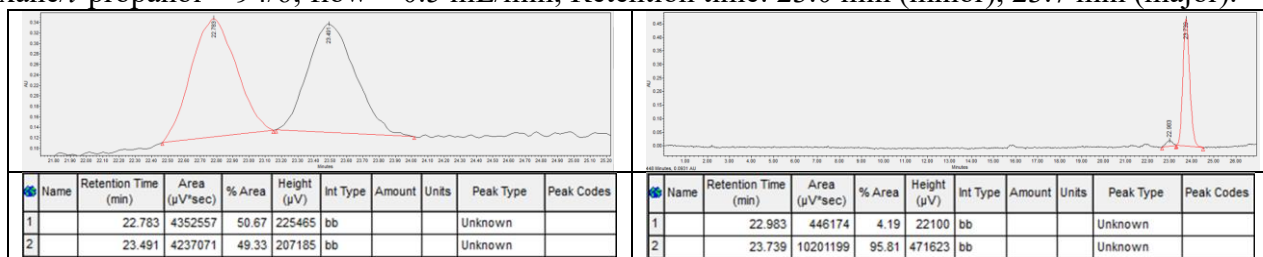

### Dibenzyl (S,Z)-2-(4-((tert-butylidimethylsilyl)oxy)-7-(1,3-dioxan-2-yl)hepta-1,4-dien-3-yl)malonate (11h)

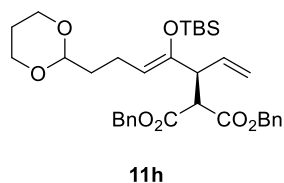

The reaction was run at RT for 14 h. Yellow oil, b:l > 20:1, 47 mg, 79% yield.  $[\alpha]_D^{25}$  -24.1 (*c* 3.01, CHCl<sub>3</sub>) for 96% ee. <sup>1</sup>H NMR (600 MHz, CDCl<sub>3</sub>) δ 7.39 – 7.24 (m, 10H), 5.88 – 5.74 (m, 1H), 5.15 – 5.02 (m, 6H), 4.45 (dt, *J* = 10.4, 6.1 Hz, 2H), 4.06 (dd, *J* = 11.8, 4.3 Hz, 2H), 3.82 (d, *J* = 9.5 Hz, 1H), 3.78 – 3.68 (m, 2H), 3.44 (t, *J* = 9.1 Hz, 1H), 2.13 – 1.98 (m, 3H), 1.53 (dd, *J* = 12.8, 7.5 Hz, 2H), 1.30 (d, *J* = 13.4 Hz, 1H), 0.92 (s, 9H), 0.14 (s, 3H), 0.11 (s, 3H); <sup>13</sup>C NMR (151 MHz, CDCl<sub>3</sub>) δ 167.62 (CO), 167.45 (CO), 148.86 (O-C=), 135.68 (CH=), 135.46 (two peaks are overlapped, quaternary carbon of Ph), 128.55 (CH of Ph), 128.53 (CH of Ph), 128.30 (two peaks are overlapped, CH of Ph), 128.24 (two peaks are overlapped, CH of Ph), 118.02 (CH<sub>2</sub>=), 108.57 (CH=), 101.81 (O-CH-O), 67.15, 67.03, 66.86, 54.88, 50.19, 35.13, 25.95, 25.93, 20.09, 18.42, -3.73, -3.92; HRMS (ESI): [M+Na]<sup>+</sup> calcd for C<sub>34</sub>H<sub>46</sub>O<sub>7</sub>NaSi<sup>+</sup> 617.2905, found 617.2903; HPLC: chiral OD-H column, detected at 220 nm; *n*-hexane/*i*-propanol = 90/10; flow = 0.5 mL/min; Retention time: 12.0 min (minor), 13.0 min (major).

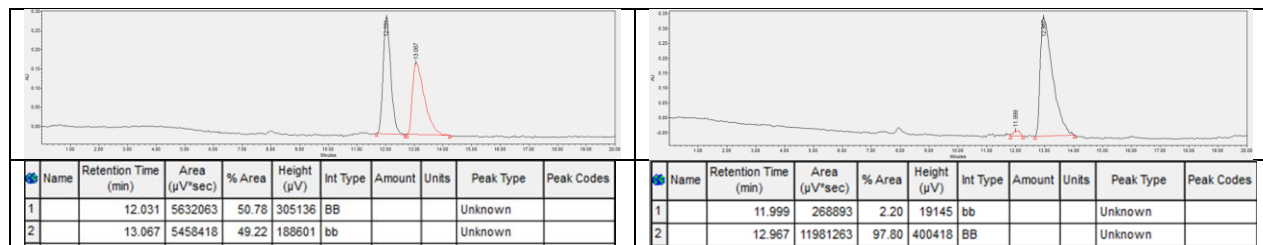

### (S)-2-(2-((tert-Butylidimethylsilyl)oxy)penta-1,4-dien-3-yl)-1,3-diphenylpropane-1,3-dione (11i)



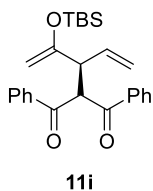

The reaction was run at RT for 12 h. Yellow oil, b:l > 20:1, 40 mg, 95% yield.  $[\alpha]_D^{25}$  -13.9 (*c* 2.58, CHCl<sub>3</sub>) for 98% ee. <sup>1</sup>H NMR (400 MHz, CDCl<sub>3</sub>) δ 7.98 (dd, *J* = 7.7, 2.5 Hz, 4H), 7.53 (q, *J* = 7.3 Hz, 2H), 7.42 (dt, *J* = 12.1, 7.7 Hz, 4H), 5.93 – 5.79 (m, 2H), 5.09 (d, *J* = 17.1 Hz, 1H), 4.98 (d, *J* = 10.1 Hz, 1H), 4.21 (s, 1H), 4.03 – 3.98 (m, 2H), 0.92 (s, 9H), 0.11 (s, 3H), -0.01 (s, 3H); <sup>13</sup>C NMR (151 MHz, CDCl<sub>3</sub>) δ 194.20, 193.95, 156.97, 137.40, 137.13, 135.71, 133.39, 133.33, 128.83, 128.78, 128.76, 128.69, 117.87, 91.59, 58.33, 52.32, 25.85, 18.22, -4.77, -5.04; HRMS (ESI): [M+Na]<sup>⊕</sup> calcd for C<sub>26</sub>H<sub>32</sub>O<sub>3</sub>NaSi<sup>⊕</sup> 443.2012, found 443.2015; HPLC: chiral AD-H column, detected at 220 nm; *n*-hexane/*i*-propanol = 94/6; flow = 0.6 mL/min; Retention time: 11.3 min (major), 12.2 min (minor).

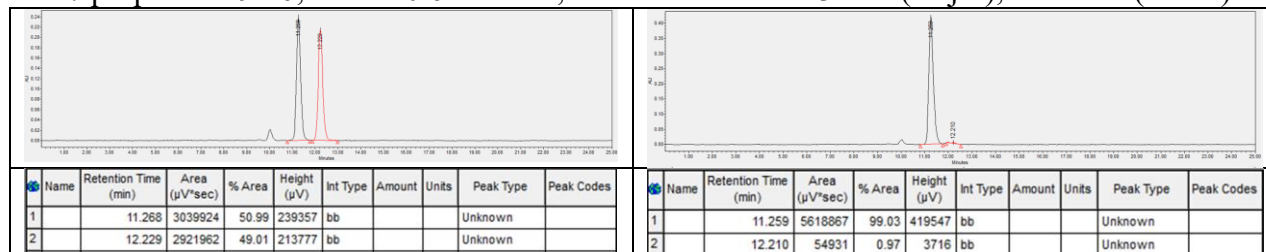

## 7. Transformations

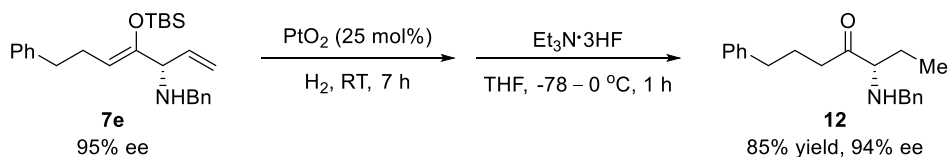

**(S)-5-(Benzylamino)-1-phenylheptan-4-one (12):** To a well stirred solution of **7e** (40 mg, 0.10 mmol) in MeOH (1.0 mL) was added PtO<sub>2</sub> (5.5 mg, 0.025 mmol). The resulting mixture was stirred under 1 atm. of hydrogen for 7 h. After this time, the reaction was filtered through Celite, dried with NaSO<sub>4</sub> and condensed. To a well stirred solution of the crude product dissolved in dry THF (0.85 mL) at -78 °C was added 3HF·Et<sub>3</sub>N (11 μL, 0.067 mmol) in dry THF (0.15 mL) dropwise. The resulting solution was stirred at -78 °C for 0.5 h. After this time, the reaction was warmed to 0 °C and was stirred for an additional 0.5 h at 0 °C. The reaction solution was condensed and further purified by flash column chromatography (hexane/ethyl acetate = 8/1 to 6/1) to afford pure product **12** as a yellow oil (25 mg) in 85% yield for two steps.  $[\alpha]_D^{25}$  +7.7 (*c* 0.61, CHCl<sub>3</sub>) for 94% ee. <sup>1</sup>H NMR (400 MHz, CDCl<sub>3</sub>) δ 7.43 – 7.16 (m, 10H), 3.76 (d, *J* = 13.1 Hz, 1H), 3.63 (d, *J* = 13.1 Hz, 1H), 3.27 (t, *J* = 6.0 Hz, 1H), 2.66 (t, *J* = 7.5 Hz, 2H), 2.61 – 2.50 (m, 1H), 2.47 – 2.37 (m, 1H), 1.99 – 1.92 (m, 3H), 1.78 – 1.68 (m, 1H), 1.60 – 1.49 (m, 1H), 0.95 (t, *J* = 7.4 Hz, 3H); <sup>13</sup>C NMR (101 MHz, CDCl<sub>3</sub>) δ 213.77, 141.64, 140.21, 128.52, 128.47, 128.46, 128.26, 127.10, 126.04, 67.78, 52.29, 39.29, 35.23, 25.52, 25.08, 10.14; HRMS (ESI): [M+H]<sup>⊕</sup> calcd for C<sub>20</sub>H<sub>26</sub>NO<sup>⊕</sup> 296.2009, found 296.2005; HPLC: chiral AD-H column, detected at 220 nm; *n*-hexane/*i*-propanol = 95/5; flow = 1.0 mL/min; Retention time: 6.4 min (major), 7.6 min (minor).

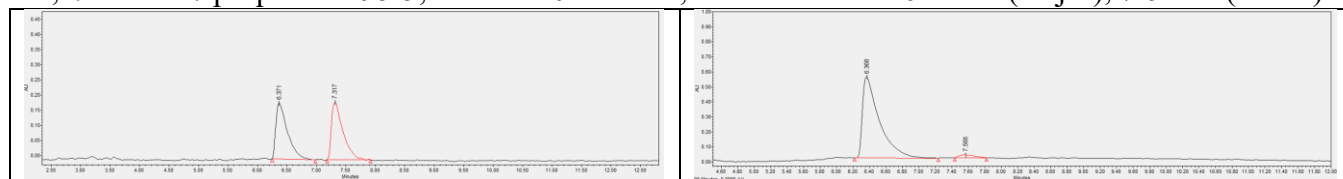

| Name | Retention Time (min) | Area ( $\mu\text{V}^2\text{sec}$ ) | % Area | Height ( $\mu\text{V}$ ) | Int Type | Amount | Units | Peak Type | Peak Codes |
|------|----------------------|------------------------------------|--------|--------------------------|----------|--------|-------|-----------|------------|
| 1    | 6.371                | 2531644                            | 49.71  | 186372                   | bb       |        |       | Unknown   |            |
| 2    | 7.317                | 2560883                            | 50.29  | 190578                   | bb       |        |       | Unknown   |            |

| Name | Retention Time (min) | Area ( $\mu\text{V}^2\text{sec}$ ) | % Area | Height ( $\mu\text{V}$ ) | Int Type | Amount | Units | Peak Type | Peak Codes |
|------|----------------------|------------------------------------|--------|--------------------------|----------|--------|-------|-----------|------------|
| 1    | 6.368                | 7647697                            | 97.07  | 540484                   | bb       |        |       | Unknown   |            |
| 2    | 7.566                | 230914                             | 2.93   | 19382                    | bb       |        |       | Unknown   |            |

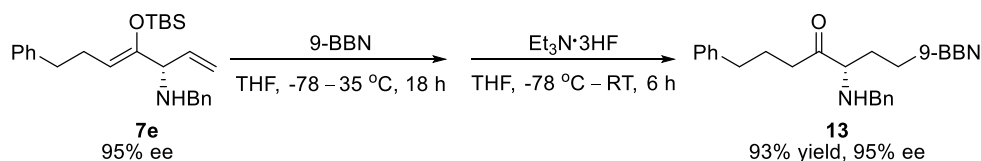

**(S)-3-(Benzylamino)-1-((1S,5S)-9-borabicyclo[3.3.1]nonan-9-yl)-7-phenylheptan-4-one (13):** To a well stirred solution of **7e** (30 mg, 0.074 mmol) in THF (0.6 mL) under  $\text{N}_2$  at  $-78^\circ\text{C}$  was added 9-BBN (0.5 M in THF, 0.18 mL, 0.090 mmol) in THF (0.2 mL) dropwise. The reaction was stirred at  $35^\circ\text{C}$  for 18 h. After this time, the reaction was cooled to  $-78^\circ\text{C}$ .  $3\text{HF}\cdot\text{Et}_3\text{N}$  (18  $\mu\text{L}$ , 0.098 mmol) in dry THF (0.2 mL) was added dropwise. After this addition, the resulting solution was stirred at  $-78^\circ\text{C}$  for 20 min and  $0^\circ\text{C}$  for 2 h in sequence. Next, another batch of  $3\text{HF}\cdot\text{Et}_3\text{N}$  (9.0  $\mu\text{L}$ , 0.049 mmol) in dry THF (0.2 mL) was added to the above reaction solution dropwise. The resulting mixture was stirred at room temperature for 4 h. The reaction solution was condensed and further purified by flash column chromatography (hexane/ethyl acetate = 50/1) to afford pure **13** as a yellow oil (28 mg) in 93% yield.  $[\alpha]_D^{25} +31.6$  ( $c$  1.92,  $\text{CHCl}_3$ ) for 95% ee.  $^1\text{H}$  NMR (400 MHz,  $\text{CDCl}_3$ )  $\delta$  7.41 – 7.19 (m, 8H), 7.01 (d,  $J = 7.2$  Hz, 2H), 5.47 (d,  $J = 11.9$  Hz, 1H), 4.50 (d,  $J = 14.1$  Hz, 1H), 3.53 (td,  $J = 9.7, 2.5$  Hz, 1H), 3.49 – 3.39 (m, 1H), 2.44 – 2.27 (m, 3H), 2.27 – 2.14 (m, 1H), 2.08 – 1.98 (m, 2H), 1.93 – 1.61 (m, 13H), 1.52 – 1.47 (m, 1H), 1.04 (dd,  $J = 13.1, 6.1$  Hz, 1H), 0.83 (s, 1H), 0.51 – 0.43 (m, 1H), 0.26 (s, 1H);  $^{13}\text{C}$  NMR (101 MHz,  $\text{CDCl}_3$ )  $\delta$  207.65, 141.12, 134.54, 129.15, 129.07, 128.64, 128.41, 128.40, 126.06, 71.18, 53.20, 37.08, 34.57, 34.35, 32.33, 31.39, 30.67, 28.07, 24.93, 24.22 (The tertiary carbon connected to boron atom was not observed); HRMS (ESI):  $[\text{M}+\text{Na}]^+$  calcd for  $\text{C}_{28}\text{H}_{38}\text{NBONa}^+$  438.2939, found 438.2918; HPLC: chiral OD-H column, detected at 220 nm;  $n$ -hexane/ $i$ -propanol = 97/3; flow = 1.0 mL/min; Retention time: 7.6 min (minor), 8.4 min (major).

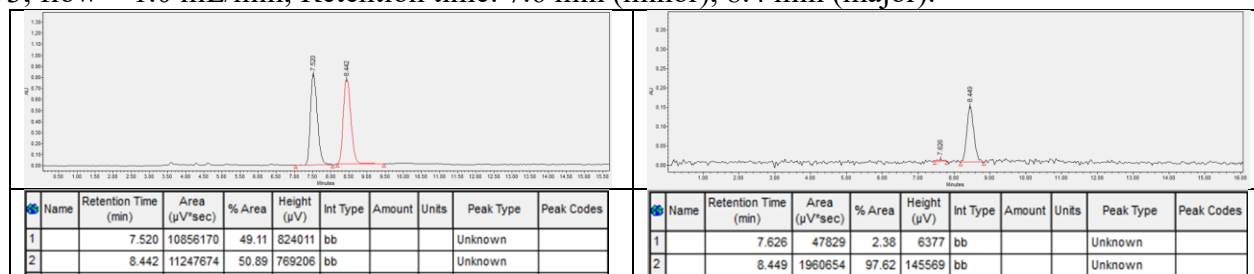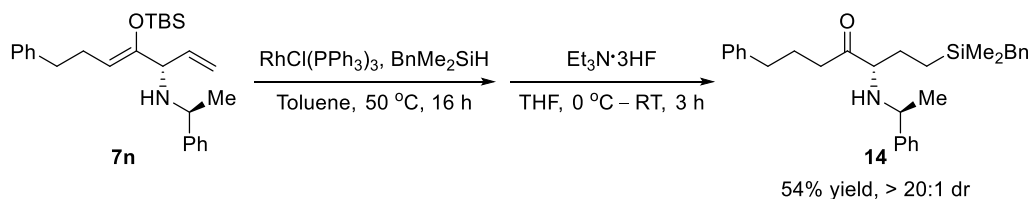

**(S)-1-(Benzylamino)-3-(((S)-1-phenylethyl)amino)heptan-4-one (14):** To a well stirred solution of **7n** (18 mg, 0.043 mmol) in toluene (0.4 mL) under  $\text{N}_2$  was added  $\text{BnMe}_2\text{SiH}$  (21  $\mu\text{L}$ , 0.13 mmol) and  $\text{RhCl}(\text{PPh}_3)_3$  (3.9 mg, 0.0043 mmol). The mixture was stirred at  $50^\circ\text{C}$  for 16 h. After this time, the reaction solution was condensed directly to evaporate the volatile materials. To a well stirred solution of the crude silane dissolved in dry THF (0.5 mL) at  $0^\circ\text{C}$  was added  $3\text{HF}\cdot\text{Et}_3\text{N}$  (14  $\mu\text{L}$ ,

0.086 mmol) in dry THF (0.1 mL) dropwise. After this addition, the reaction was stirred at 0 °C for 1 h and room temperature for 2 h in sequence. This crude reaction solution was condensed to obtain a  $^1\text{H}$  NMR spectrum for determination of the diastereoselectivity. The product was further purified by flash column chromatography (hexane/ethyl acetate = 20/1 to 12/1) to afford pure **14** as a yellow oil (11 mg) in 54% yield for two steps.  $[\alpha]_{\text{D}}^{25}$  -4.1 (*c* 0.71,  $\text{CHCl}_3$ ). *dr* >20:1.  $^1\text{H}$  NMR (600 MHz,  $\text{CDCl}_3$ )  $\delta$  7.31 – 7.23 (m, 7H), 7.19 (t, *J* = 7.6 Hz, 3H), 7.14 (d, *J* = 7.5 Hz, 2H), 7.06 (t, *J* = 7.3 Hz, 1H), 6.96 (d, *J* = 7.5 Hz, 2H), 3.54 (q, *J* = 6.4 Hz, 1H), 3.03 – 2.93 (m, 1H), 2.60 (t, *J* = 7.5 Hz, 2H), 2.35 (dt, *J* = 16.9, 7.4 Hz, 1H), 2.25 – 2.17 (m, 1H), 2.03 (s, 2H), 1.91 – 1.83 (m, 3H), 1.46 – 1.40 (m, 1H), 1.30 (d, *J* = 6.5 Hz, 3H), 0.55 (td, *J* = 13.8, 3.8 Hz, 1H), 0.35 (td, *J* = 13.9, 4.5 Hz, 1H), -0.09 (s, 3H), 0.08 (s, 3H);  $^{13}\text{C}$  NMR (151 MHz,  $\text{CDCl}_3$ )  $\delta$  214.79, 145.56, 141.57, 140.13, 128.51, 128.48 (two peaks were overlapped, CH of Ph), 128.28, 128.11, 127.06, 126.96, 126.06, 124.09, 66.89, 56.85, 40.14, 35.15, 27.35, 25.57, 25.47, 24.96, 10.44, -3.68; HRMS (ESI):  $[\text{M}+\text{H}]^{\oplus}$  calcd for  $\text{C}_{30}\text{H}_{40}\text{NSiO}^{\oplus}$  458.2874, found 458.2875.

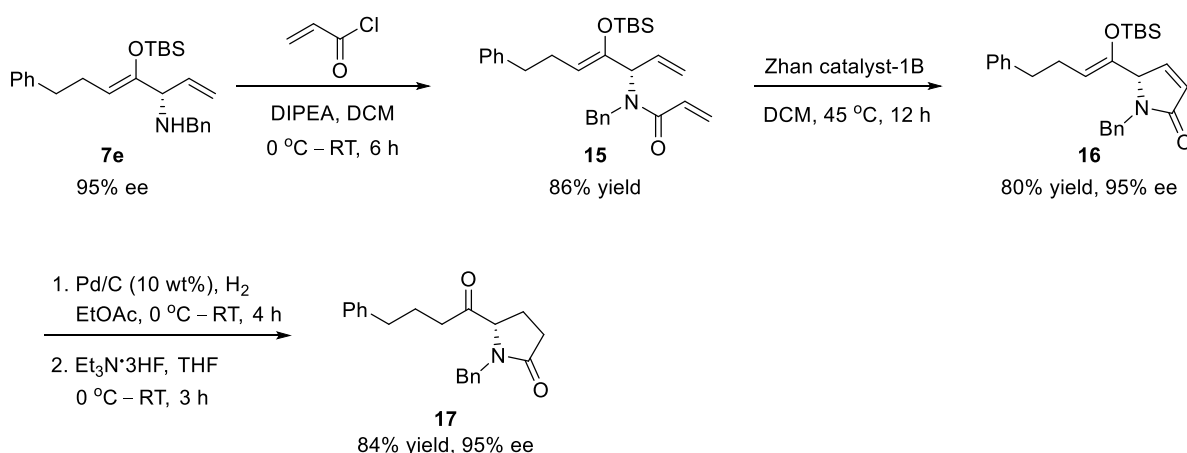

**(*S,Z*)-*N*-Benzyl-*N*-(4-((*tert*-butyldimethylsilyl)oxy)-7-phenylhepta-1,4-dien-3-yl)acrylamide (**15**):**

To a well stirred solution of **7e** (34 mg, 0.083 mmol) in DCM (0.5 mL) under  $\text{N}_2$  at 0 °C was added DIPEA (27  $\mu\text{L}$ , 0.17 mmol) in DCM (0.2 mL). After this addition, acryloyl chloride (10  $\mu\text{L}$ , 0.13 mmol) in DCM (0.2 mL) was added to the above solution dropwise. The resulting mixture was stirred at room temperature for 12 h. After this time, the reaction solution was condensed and further purified by flash column chromatography (hexane/ethyl acetate = 15/1) to afford pure product **15** as a colorless oil (33 mg) in 86% yield.  $^1\text{H}$  NMR (400 MHz,  $\text{CDCl}_3$ )  $\delta$  7.34 – 7.12 (m, 10H), 6.61 – 4.44 (m, 10H), 2.64 – 2.23 (m, 4H), 0.98 – 0.93 (m, 9H), 0.26 – 0.13 (m, 6H);  $^{13}\text{C}$  NMR (101 MHz,  $\text{CDCl}_3$ )  $\delta$  167.20, 147.53, 141.94, 138.70, 133.43, 128.63, 128.39 (two peaks were overlapped), 128.30, 128.06, 126.98, 126.47, 125.80, 118.14, 112.80, 60.81, 47.49, 35.56, 26.98, 25.89, 18.25, -3.79, -4.01; HRMS (ESI):  $[\text{M}+\text{Na}]^{\oplus}$  calcd for  $\text{C}_{29}\text{H}_{39}\text{NSiO}_2\text{Na}^{\oplus}$  484.2642, found 484.2635.

**(*S,Z*)-1-Benzyl-5-(1-((*tert*-butyldimethylsilyl)oxy)-4-phenylbut-1-en-1-yl)-1,5-dihydro-2*H*-pyrrol-2-one (**16**):**

To a well stirred solution of **15** (17 mg, 0.037 mmol) in DCM (0.4 mL) in a glovebox was added Zhan Catalyst-1B (1.4 mg, 0.0018 mmol). The resulting mixture was stirred at 45 °C for 12 h. After this time, the reaction solution was condensed and further purified by flash column chromatography (hexane/ethyl acetate = 6/1) to afford pure **16** as colorless oil (13 mg) in 80% yield.  $[\alpha]_{\text{D}}^{25}$  -75.6 (*c* 0.71,  $\text{CHCl}_3$ ) for 95% ee.  $^1\text{H}$  NMR (400 MHz,  $\text{CDCl}_3$ )  $\delta$  7.37 – 7.10 (m, 10H), 6.96 (d, *J* = 5.4 Hz, 1H), 6.17 (d, *J* = 5.1 Hz, 1H), 5.19 (d, *J* = 14.9 Hz, 1H), 4.63 (t, *J* = 7.0 Hz, 1H), 4.18 (s, 1H), 3.84 (d, *J* = 14.9 Hz, 1H), 2.67 (t, *J* = 7.3 Hz, 2H), 2.40 (dd, *J* = 14.6, 7.2 Hz, 2H), 0.88 (s, 9H), 0.06 (s,

3H), -0.01 (s, 3H);  $^{13}\text{C}$  NMR (101 MHz,  $\text{CDCl}_3$ )  $\delta$  171.69, 146.58, 143.87, 141.56, 137.50, 128.72, 128.49, 128.45, 128.24, 127.54, 127.06, 126.05, 111.30, 66.52, 43.76, 35.71, 27.00, 25.81, 18.35, -3.58, -3.61; HRMS (ESI):  $[\text{M}+\text{Na}]^{\oplus}$  calcd for  $\text{C}_{27}\text{H}_{35}\text{NSiO}_2\text{Na}^{\oplus}$  456.2329, found 456.2327; HPLC: chiral OD-H column, detected at 220 nm; *n*-hexane/*i*-propanol = 90/10; flow = 0.5 mL/min; Retention time: 15.4 min (minor), 16.3 min (major).

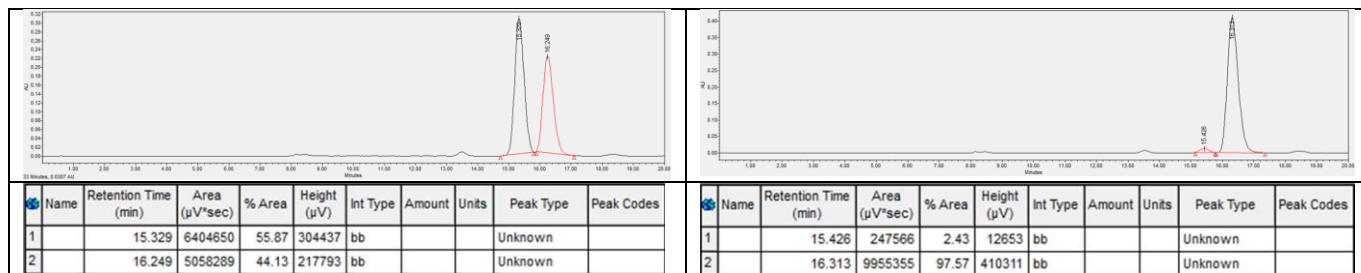

**(S)-1-Benzyl-5-(4-phenylbutanoyl)pyrrolidin-2-one (17)**: To a well stirred solution of **16** (10 mg, 0.023 mmol) in ethyl acetate (5 mL) under one atm. of hydrogen was added Pd/C (10 wt%, 1.2 mg, 0.0012 mmol). The resulting mixture was stirred at 0 °C for 1 h first, then at room temperature for 3 h. The solution was filtered through Celite, washed with ethyl acetate and condensed to evaporate the volatile materials. To a well stirred solution of the crude hydrogenation product in dry THF (0.3 mL) at 0 °C was added  $3\text{HF}\cdot\text{Et}_3\text{N}$  (4.0  $\mu\text{L}$ , 0.023 mmol) in dry THF (0.1 mL) dropwise. The resulting mixture was stirred at 0 °C for 1 h. After this time, another batch of  $3\text{HF}\cdot\text{Et}_3\text{N}$  (4.0  $\mu\text{L}$ , 0.023 mmol) in dry THF (0.1 mL) was added to the above solution dropwise and the mixtures was stirred for another 2 h at room temperature. This reaction solution was condensed and further purified by flash column chromatography (hexane/ethyl acetate = 1/1) to afford pure **17** as a yellow oil (6.3 mg) in 84% yield for two steps.  $[\alpha]_{\text{D}}^{25} +24.0$  (*c* 0.42,  $\text{CHCl}_3$ ) for 95% ee.  $^1\text{H}$  NMR (600 MHz,  $\text{CDCl}_3$ )  $\delta$  7.30 – 7.26 (m, 5H), 7.20 (t,  $J = 7.2$  Hz, 1H), 7.13 (dd,  $J = 11.9, 7.8$  Hz, 4H), 5.09 (d,  $J = 14.7$  Hz, 1H), 3.97 (dd,  $J = 9.6, 4.0$  Hz, 1H), 3.84 (d,  $J = 14.7$  Hz, 1H), 2.57 (t,  $J = 7.5$  Hz, 2H), 2.49 – 2.31 (m, 3H), 2.24 – 2.16 (m, 2H), 1.89 – 1.74 (m, 3H);  $^{13}\text{C}$  NMR (151 MHz,  $\text{CDCl}_3$ )  $\delta$  208.16, 175.05, 141.08, 135.89, 128.87, 128.65, 128.55, 128.47, 127.91, 126.22, 64.15, 45.64, 38.34, 34.90, 29.57, 24.65, 21.88; HRMS (ESI):  $[\text{M}+\text{Na}]^{\oplus}$  calcd for  $\text{C}_{21}\text{H}_{23}\text{NO}_2\text{Na}^{\oplus}$  344.1621, found 344.1618; HPLC: chiral OD-H column, detected at 220 nm; *n*-hexane/*i*-propanol = 80/20; flow = 1.0 mL/min; Retention time: 17.7 min (minor), 21.2 min (major).

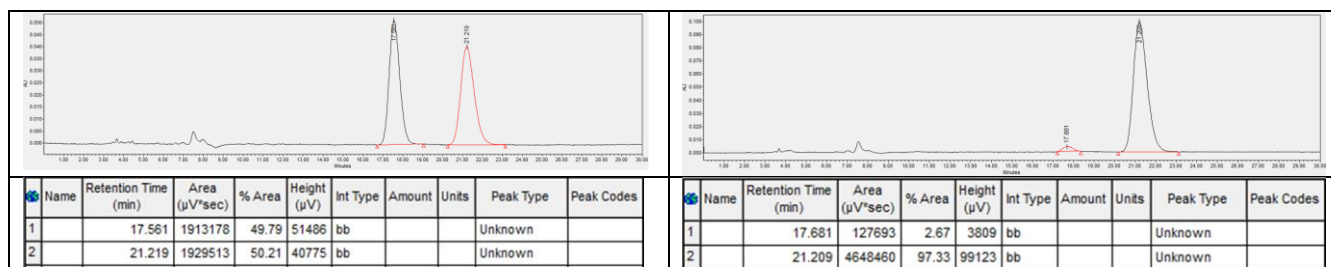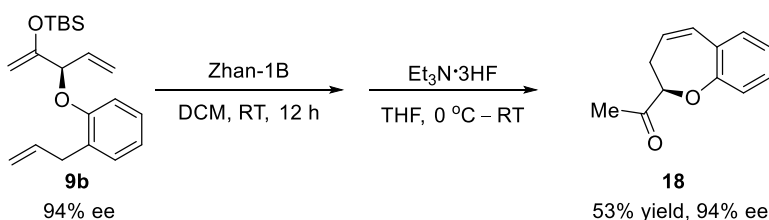

**(R)-1-(2,3-Dihydrobenzo[b]oxepin-2-yl)ethan-1-one (18)**: To a well stirred solution of **9b** (29 mg, 0.088 mmol) in DCM (1.5 mL) under N<sub>2</sub> was added Zhan Catalyst-1B<sup>3</sup> (3.4 mg, 0.00044 mmol). The mixture was stirred at room temperature for 12 h. After this time, the reaction solution was condensed directly to evaporate the volatile materials. To a well stirred solution of the crude cyclized product dissolved in dry THF (0.6 mL) at 0 °C was added 3HF·Et<sub>3</sub>N (29 μL, 0.18 mmol) in dry THF (0.1 mL) dropwise. The resulting solution was stirred at 0 °C for 1 h. Next, another 3HF·Et<sub>3</sub>N (14 μL, 0.090 mmol) in dry THF (0.1 mL) was added to the above solution dropwise. The reaction was stirred at room temperature for 11 h. This reaction solution was condensed and further purified by flash column chromatography (hexane/ethyl acetate = 50/1 to 40/1) to afford pure product **18** as a colorless oil (9 mg) in 53% yield for two steps.  $[\alpha]_D^{25} +269.0$  (*c* 0.40, CHCl<sub>3</sub>) for 94% ee. <sup>1</sup>H NMR (400 MHz, CDCl<sub>3</sub>) δ 7.19 – 7.16 (m, 2H), 7.08 – 7.02 (m, 2H), 6.35 (dd, *J* = 11.8, 2.1 Hz, 1H), 5.96 (ddd, *J* = 11.8, 6.2, 2.7 Hz, 1H), 4.34 (dd, *J* = 10.3, 1.9 Hz, 1H), 2.90 – 2.84 (m, 1H), 2.77 – 2.69 (m, 1H), 2.44 (s, 3H); <sup>13</sup>C NMR (151 MHz, CDCl<sub>3</sub>) δ 207.71, 157.18, 132.78, 128.63, 128.40, 128.38, 126.97, 123.46, 120.03, 84.50, 35.12, 26.72; HRMS (ESI): [M+Na]<sup>⊕</sup> calcd for C<sub>12</sub>H<sub>12</sub>O<sub>2</sub>Na<sup>⊕</sup> 211.0730, found 211.0733; HPLC: chiral OD-H column, detected at 220 nm; *n*-hexane/*i*-propanol = 97/3; flow = 1.0 mL/min; Retention time: 7.0 min (minor), 8.7 min (major).

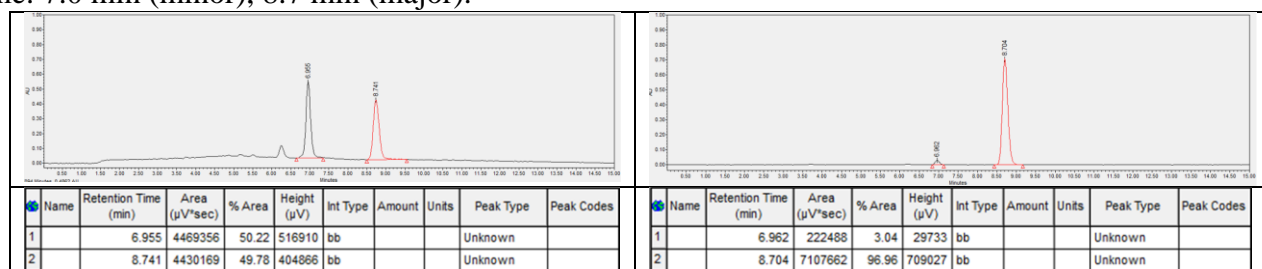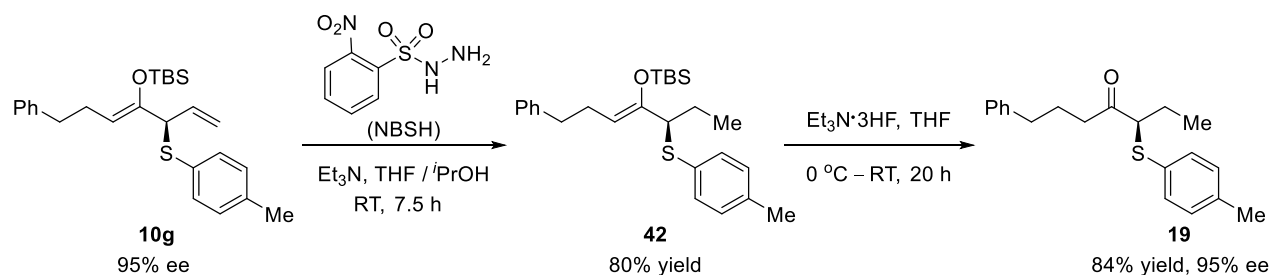

**(R,Z)-tert-Butyldimethyl((1-phenyl-5-(*p*-tolylthio)hept-3-en-4-yl)oxy)silane (42)**: To a well stirred solution of **10g** (18 mg, 0.042 mmol) in THF (0.4 mL) under N<sub>2</sub> at room temperature was added freshly prepared NBSH (18 mg, 0.084 mmol) and *iso*-propanol (0.4 mL). The resulting mixture was stirred at room temperature for 7.5 h. After this time, the reaction solution was condensed and further purified by flash column chromatography (hexane/ethyl acetate = 100/1) to afford pure product **42** as a colorless oil (14 mg) in 80% yield. <sup>1</sup>H NMR (600 MHz, Chloroform-*d*) δ 7.32 – 7.07 (m, 9H), 4.63 – 4.46 (m, 1H), 3.27 (t, *J* = 7.2 Hz, 1H), 2.55 (t, *J* = 7.7 Hz, 2H), 2.33 – 2.30 (m, 5H), 1.73 – 1.63 (m, 2H), 0.98 – 0.95 (m, 12H), 0.19 (s, 3H), 0.15 (s, 3H); <sup>13</sup>C NMR (151 MHz, CDCl<sub>3</sub>) δ 148.59, 142.28, 137.21, 133.43, 131.62, 129.41, 128.48, 128.30, 125.73, 109.39, 56.41, 36.00, 27.29, 26.30, 26.11, 21.20, 18.65, 12.06, -3.22, -3.59. HRMS (ESI): [M+H]<sup>⊕</sup> calcd for C<sub>26</sub>H<sub>39</sub>SiOS<sup>⊕</sup> 427.2485, found 427.2490.

**(R)-1-Phenyl-5-(*p*-tolylthio)heptan-4-one (19)**: To a well stirred solution of **42** (14 mg, 0.033 mmol) in dry THF (0.4 mL) at 0 °C was added 3HF·Et<sub>3</sub>N (10 μL, 2.0 equiv) in dry THF (0.1 mL) dropwise. The resulting solution was stirred at 0 °C for 1 h. Then, another 3HF·Et<sub>3</sub>N (15 μL, 3.0 equiv) in dry THF



(0.1 mL) was added to the above solution dropwise. The reaction was stirred at room temperature for another 1 h. Next, 3HF·Et<sub>3</sub>N (15 μL, 3.0 equiv) in dry THF (0.1 mL) was added to the above solution dropwise again and the mixtures was stirred for another 18 h at room temperature. This reaction solution was condensed and further purified by flash column chromatography (hexane/ethyl acetate = 40/1) to afford pure product **19** as a colorless oil (8.4 mg) in 84% yield.  $[\alpha]_D^{25} +129.4$  (*c* 0.48, CHCl<sub>3</sub>) for 95% ee. <sup>1</sup>H NMR (600 MHz, Chloroform-*d*) δ 7.30 – 7.16 (m, 7H), 7.10 (d, *J* = 7.7 Hz, 2H), 3.46 (t, *J* = 7.4 Hz, 1H), 2.69 – 2.54 (m, 4H), 2.33 (s, 3H), 1.94 – 1.87 (m, 2H), 1.85 – 1.78 (m, 1H), 1.73 – 1.66 (m, 1H), 1.00 (t, *J* = 7.3 Hz, 3H); <sup>13</sup>C NMR (151 MHz, CDCl<sub>3</sub>) δ 207.01, 141.75, 138.34, 133.46, 129.89, 129.15, 128.53, 128.42, 125.97, 59.04, 39.10, 35.21, 25.50, 23.62, 21.22, 12.01; HRMS (ESI): [M+Na]<sup>⊕</sup> calcd for C<sub>20</sub>H<sub>24</sub>SONa<sup>⊕</sup> 335.1440, found 335.1441. HPLC: chiral OD-H column, detected at 220 nm; *n*-hexane/*i*-propanol = 99/1; flow = 1.0 mL/min; Retention time: 17.1 min (major), 19.8 min (minor).

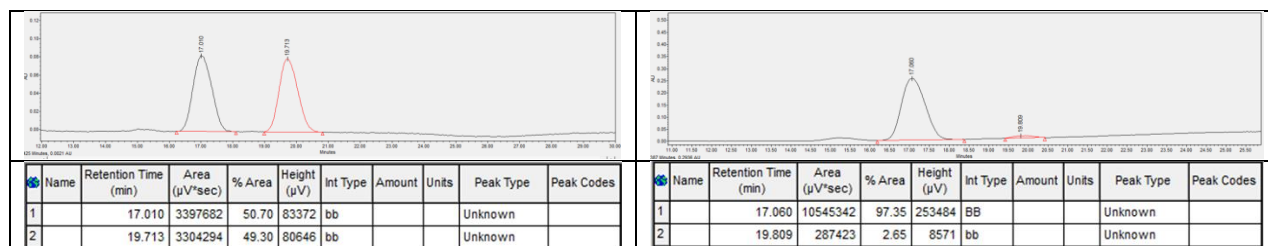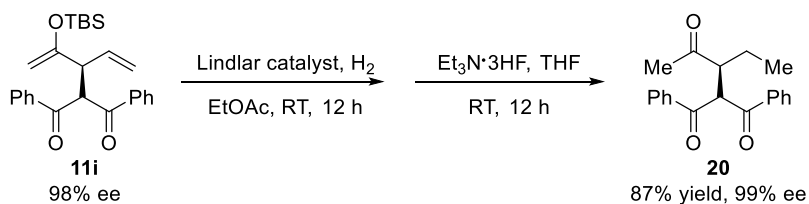

**(S)-2-Benzoyl-3-ethyl-1-phenylpentane-1,4-dione (20)**: To a well stirred solution of **11i** (20 mg, 0.048 mmol) in ethyl acetate (2.0 mL) was added Lindlar cat. (CaCO<sub>3</sub>·Pd, 9.6 mg, 0.048 mmol). The resulting mixture was stirred under 1 atm. of hydrogen for 12 h. Next, another Lindlar cat. (CaCO<sub>3</sub>·Pd, 20 mg, 0.096 mmol) was added to the above solution. The resulting mixture was stirred under 1 atm. of hydrogen for another 4 h. After this time, the reaction was filtered through Celite, washed by ethyl acetate (10 × 3 mL) and condensed. To a well stirred solution of the crude product above dissolved in dry THF (0.30 mL) at room temperature was added 3HF·Et<sub>3</sub>N (8 μL, 1.0 equiv) in dry THF (0.10 mL) dropwise. The resulting solution was stirred for 1 h. Next, another 3HF·Et<sub>3</sub>N (23 μL, 3.0 equiv) in dry THF (0.10 mL) was added to the above solution. The resulting mixture was stirred at room temperature for 12 h. After this time, the reaction solution was condensed and further purified by flash column chromatography (hexane/ethyl acetate = 9/1 to 6/1) to afford pure product **20** as a yellow oil (13 mg) in 87% yield for two steps.  $[\alpha]_D^{25} -261.4$  (*c* 0.78, CHCl<sub>3</sub>) for 99% ee. <sup>1</sup>H NMR (500 MHz, Chloroform-*d*) δ 8.05 (d, *J* = 7.8 Hz, 2H), 7.88 (d, *J* = 7.8 Hz, 2H), 7.60 (t, *J* = 7.4 Hz, 1H), 7.54 – 7.42 (m, 3H), 7.33 (t, *J* = 7.7 Hz, 2H), 5.78 (d, *J* = 10.6 Hz, 1H), 3.89 – 3.78 (m, 1H), 2.37 (s, 3H), 1.61 – 1.51 (m, 2H), 0.88 (t, *J* = 7.5 Hz, 3H); <sup>13</sup>C NMR (151 MHz, CDCl<sub>3</sub>) δ 211.35, 195.58, 195.37, 136.80, 136.51, 134.01, 133.45, 129.11, 129.02, 128.76, 128.70, 59.20, 53.74, 31.49, 23.07, 11.32; HRMS (ESI): [M+Na]<sup>⊕</sup> calcd for C<sub>20</sub>H<sub>20</sub>NaO<sub>3</sub><sup>⊕</sup> 331.1305, found 331.1305; HPLC: chiral OD-H column, detected at 254 nm; *n*-hexane/*i*-propanol = 97/3; flow = 1.0 mL/min; Retention time: 12.6 min (major), 13.4 min (minor).

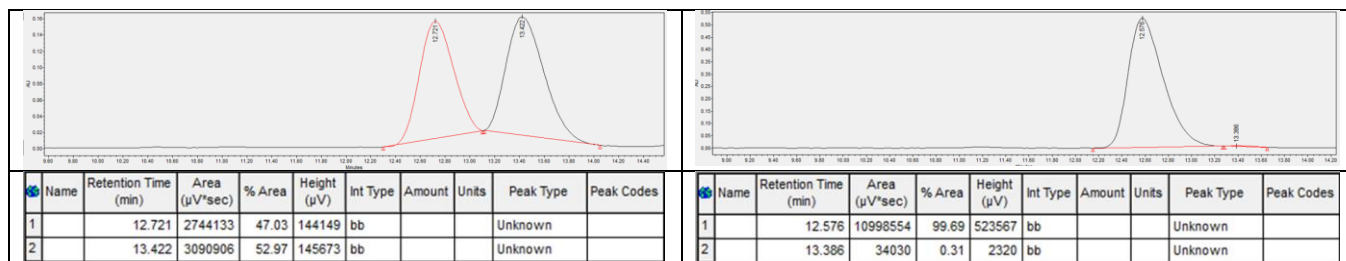

## 8. Reference

1. Ashfeld, B. L., Miller, K. A., Martin, S. F. Direct, stereoselective substitution in  $[\text{Rh}(\text{CO})_2\text{Cl}]_2$ -catalyzed allylic alkylations of unsymmetrical substrates. *Org. Lett.* **6**, 1321–1324 (2004).
2. Gao, W., Wang, Q., Xie, Y., Lv, H., Zhang, X. Rhodium-catalyzed asymmetric hydrogenation of  $\alpha$ -dehydroamino ketones: a general approach to chiral  $\alpha$ -amino ketones. *Chem. Asian J.* **11**, 231–233 (2016).
3. Zhang, Z.-Y. J. Recyclable ruthenium catalysts for metathesis reactions. U.S. Patent US 2007/0043180 A1.



**9. Copies of  $^1\text{H}$  NMR,  $^{13}\text{C}$  NMR,  $^{19}\text{F}$  NMR and DEPT spectra**

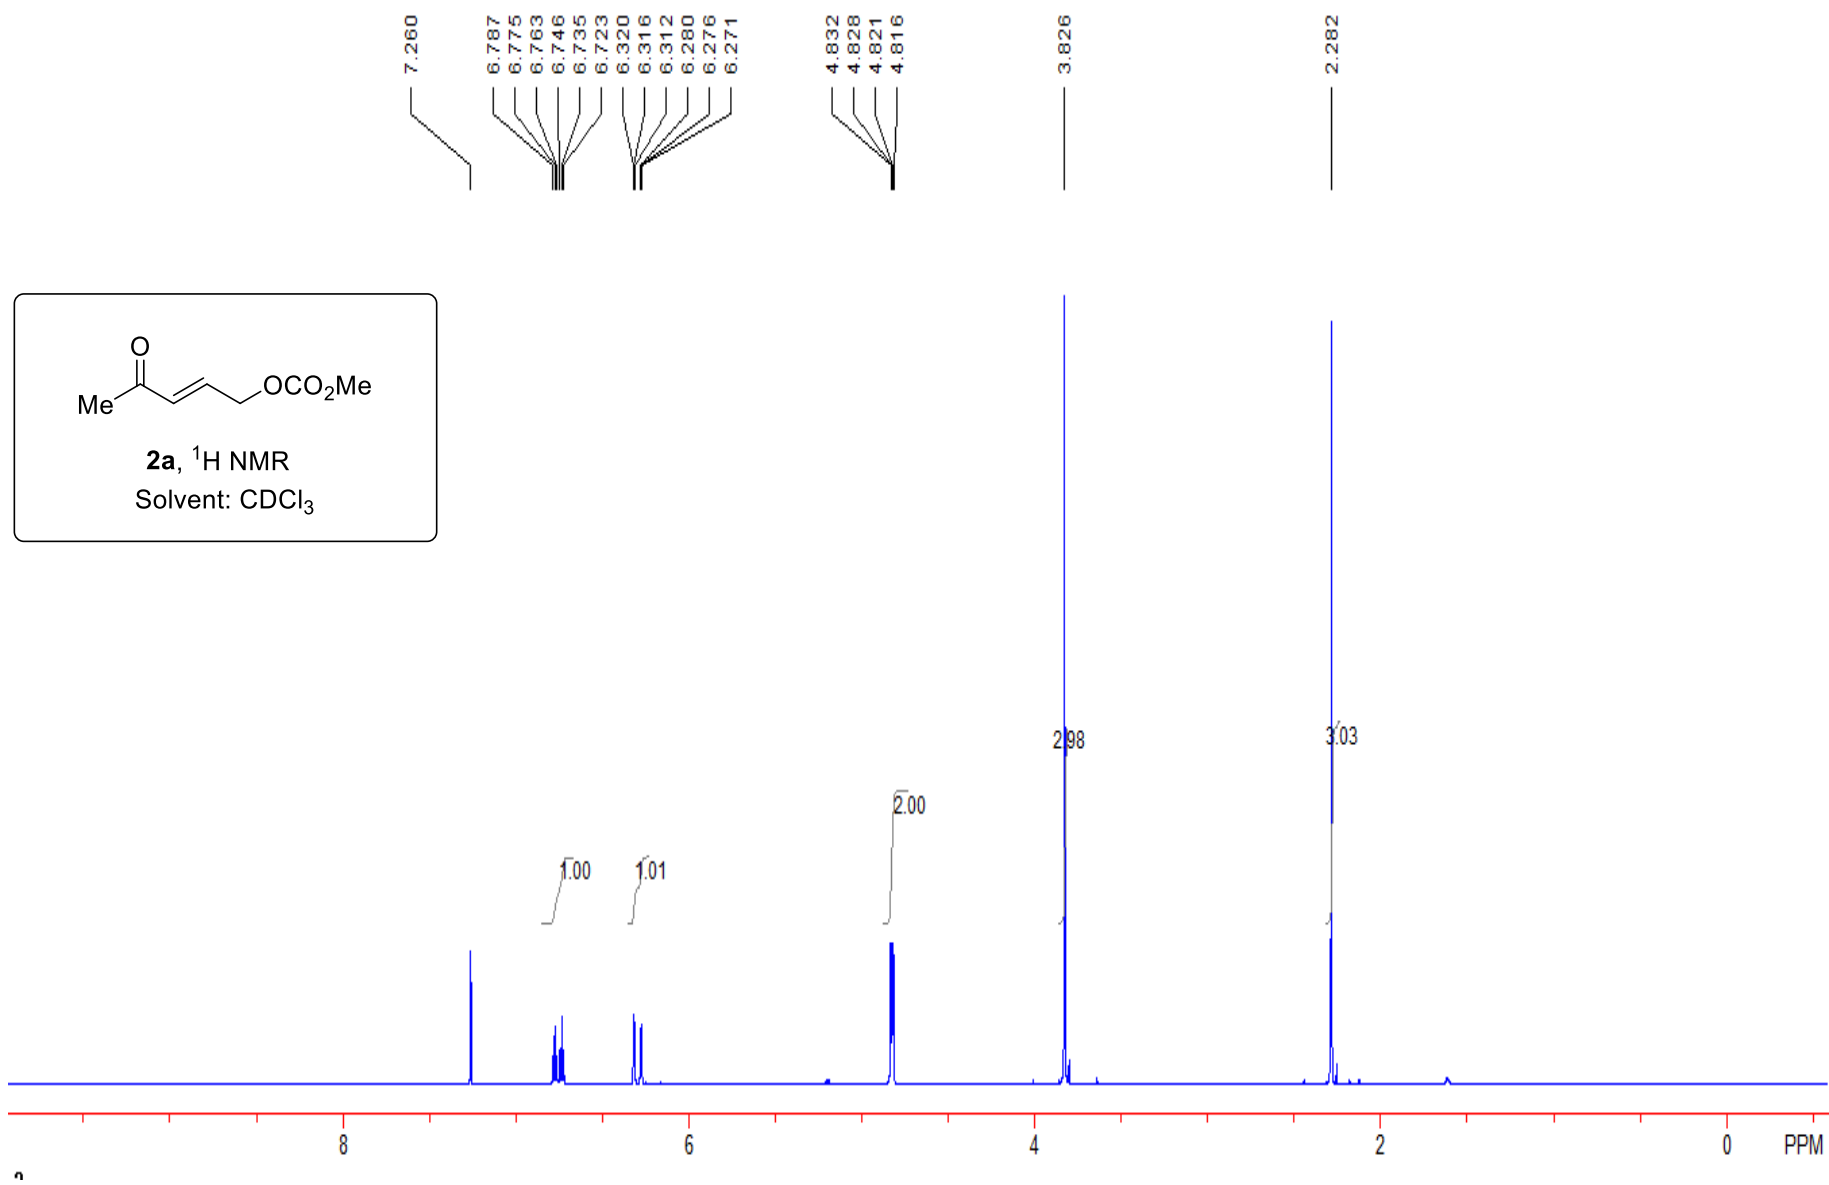

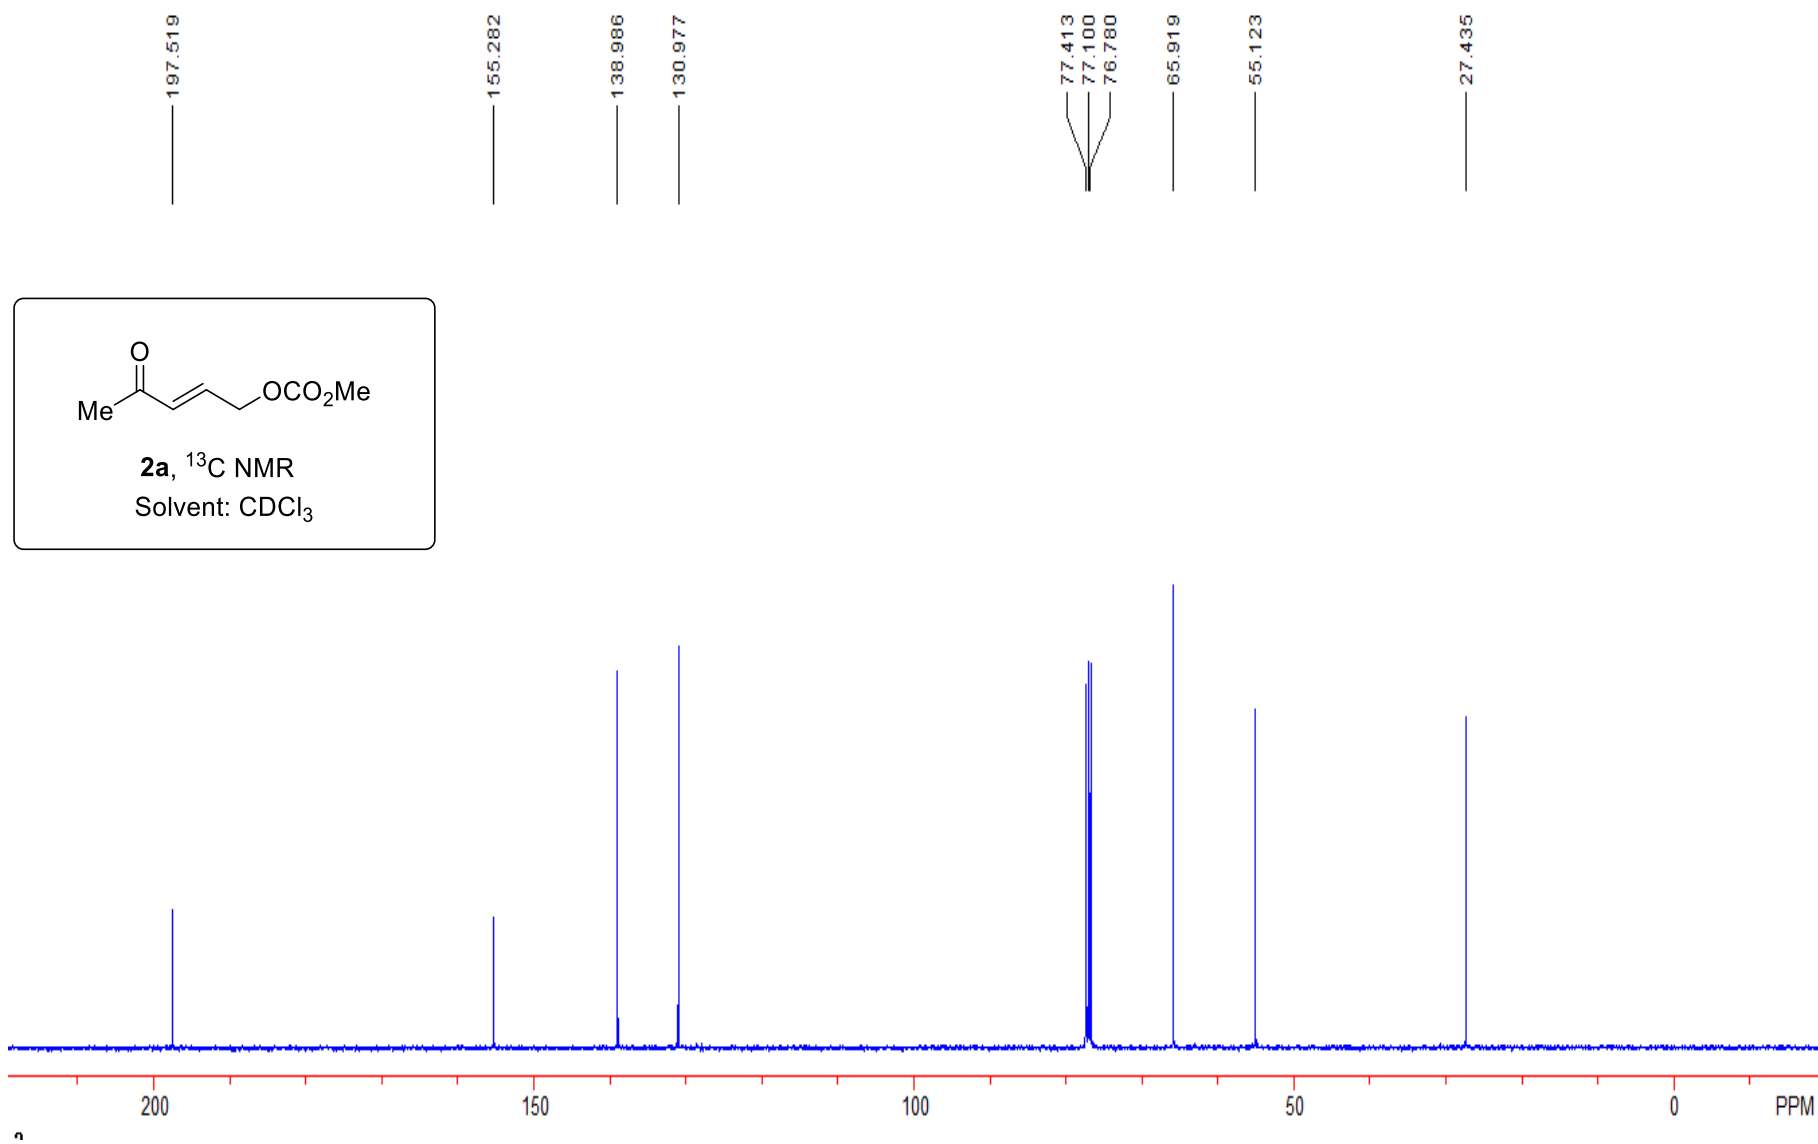

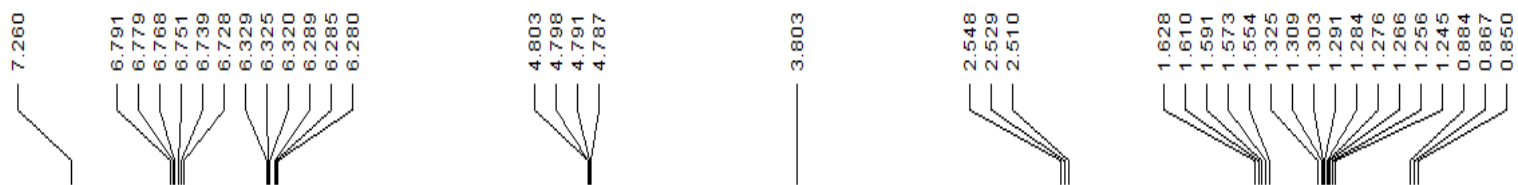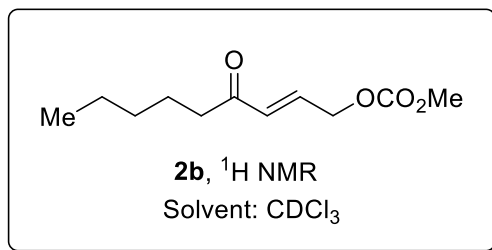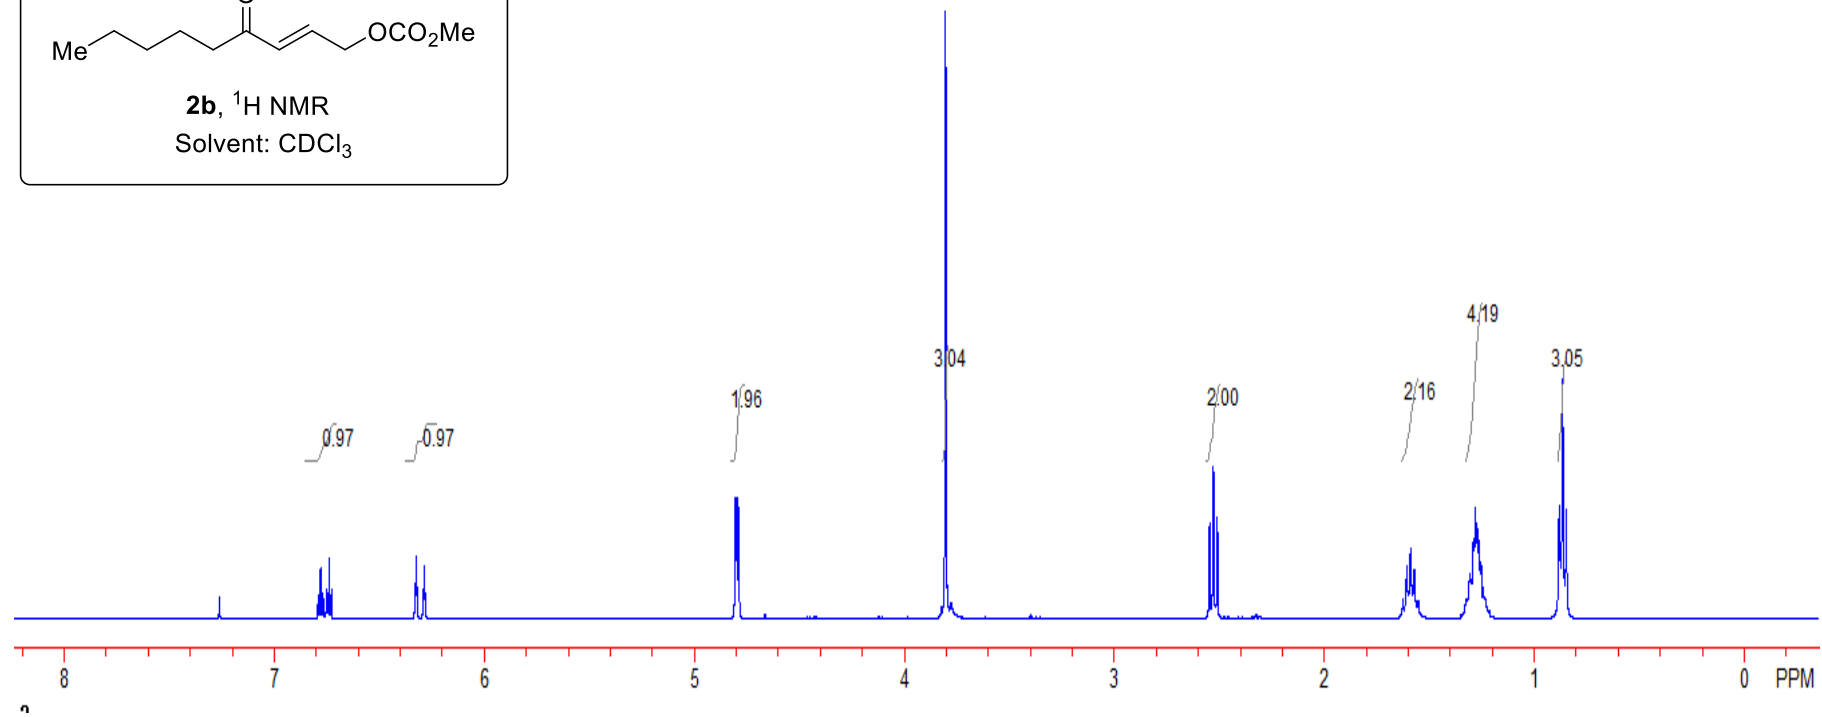

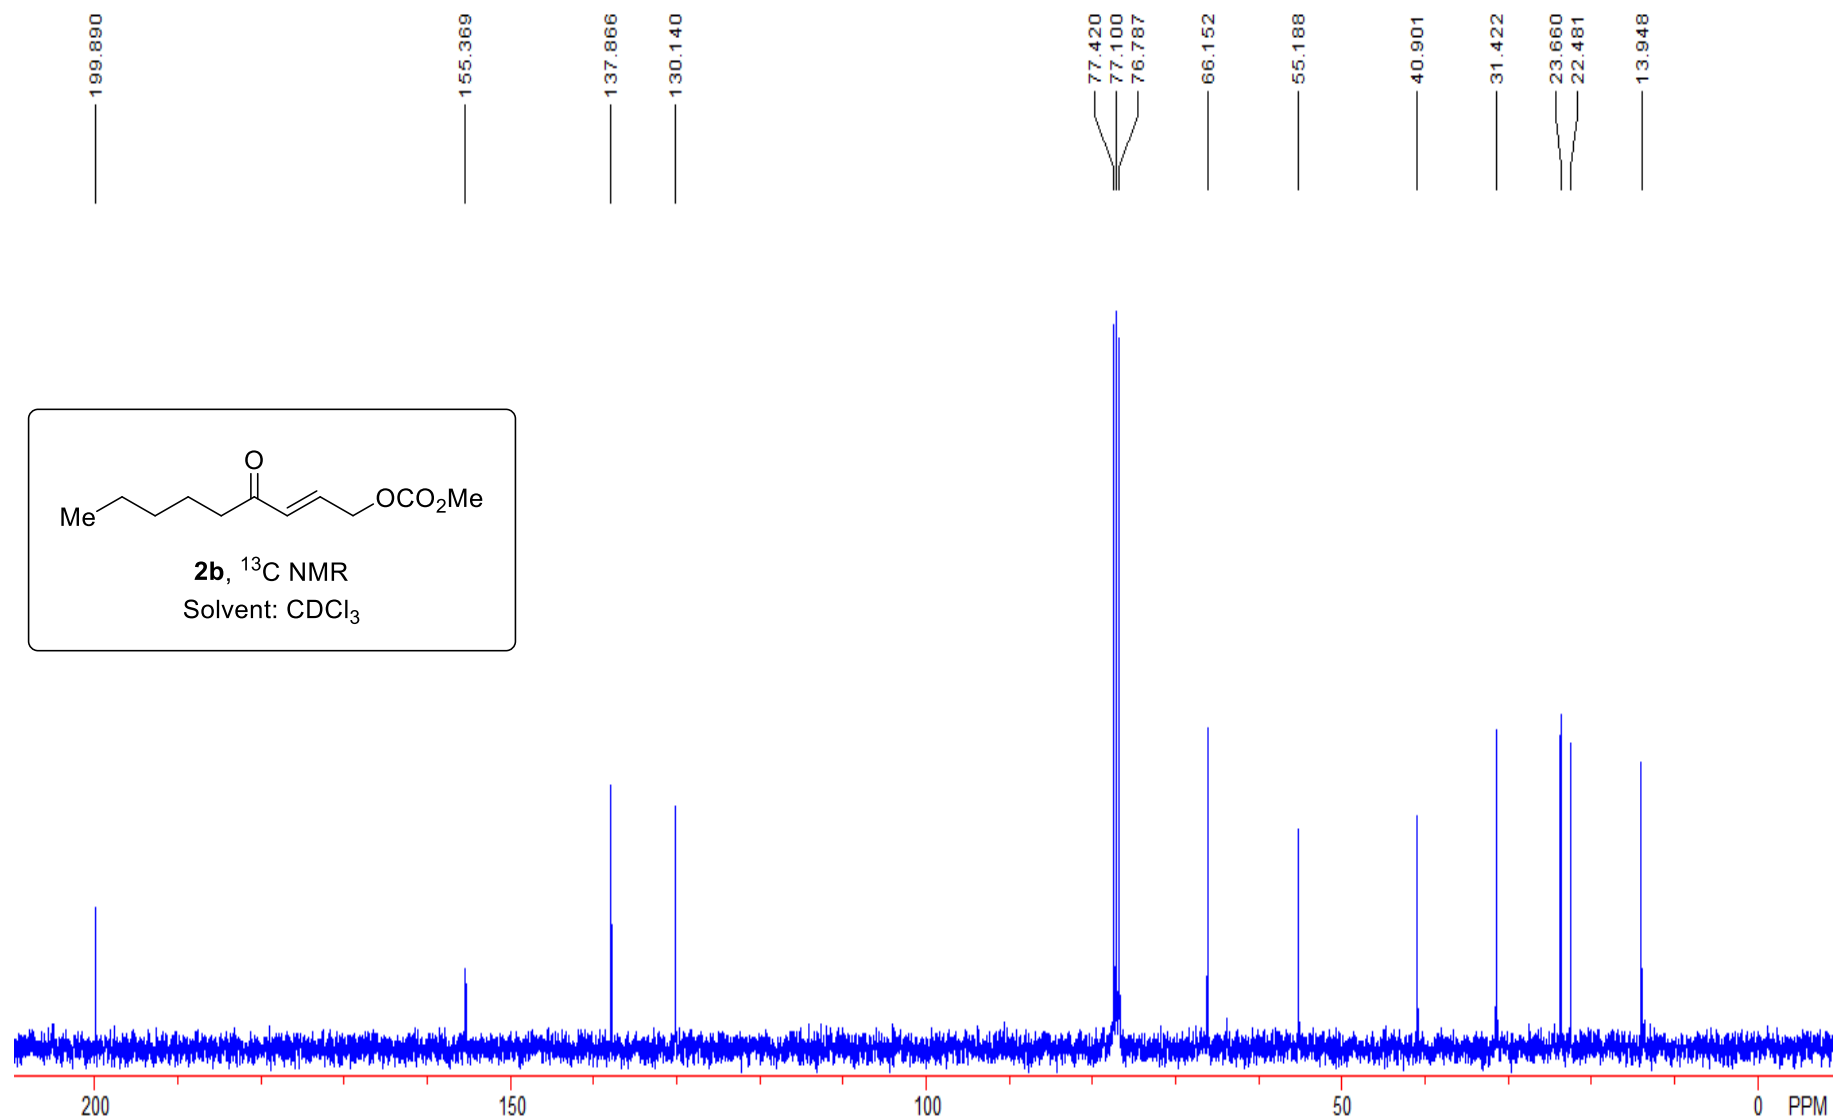

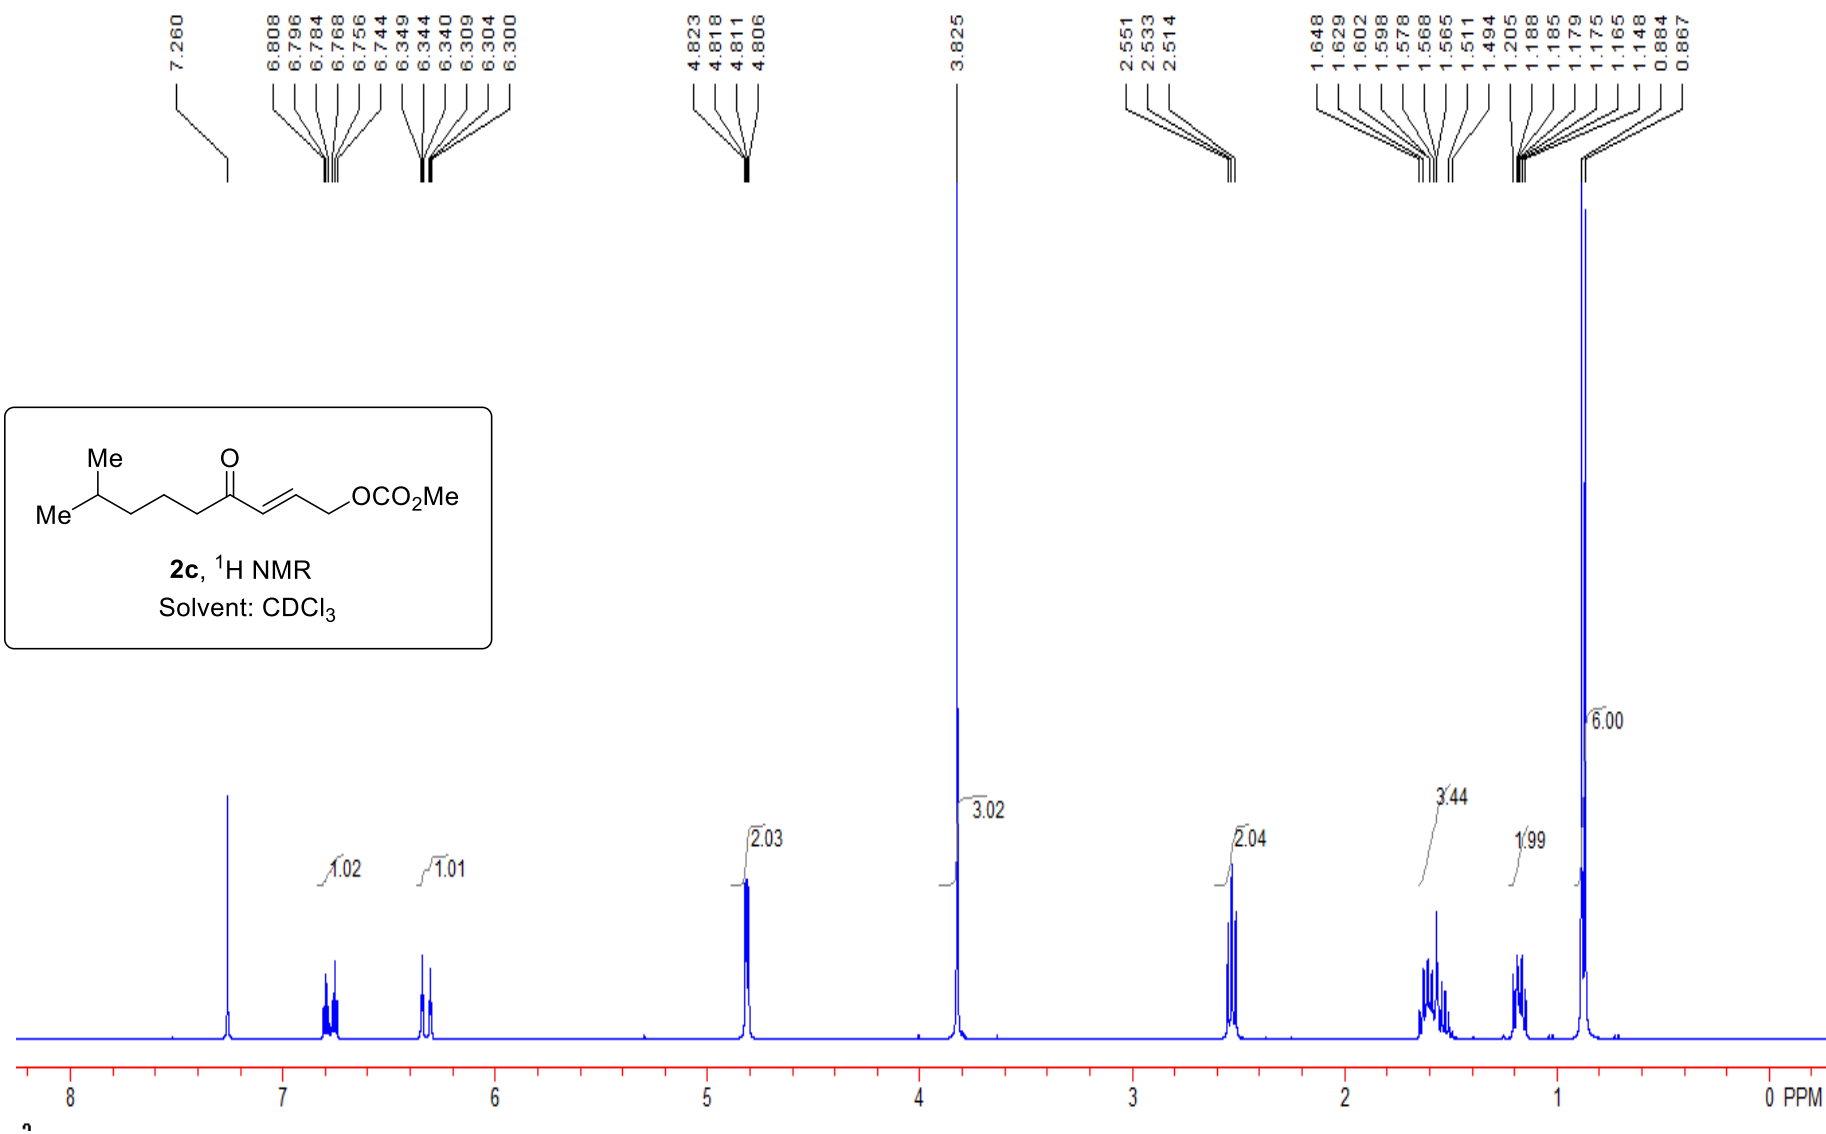



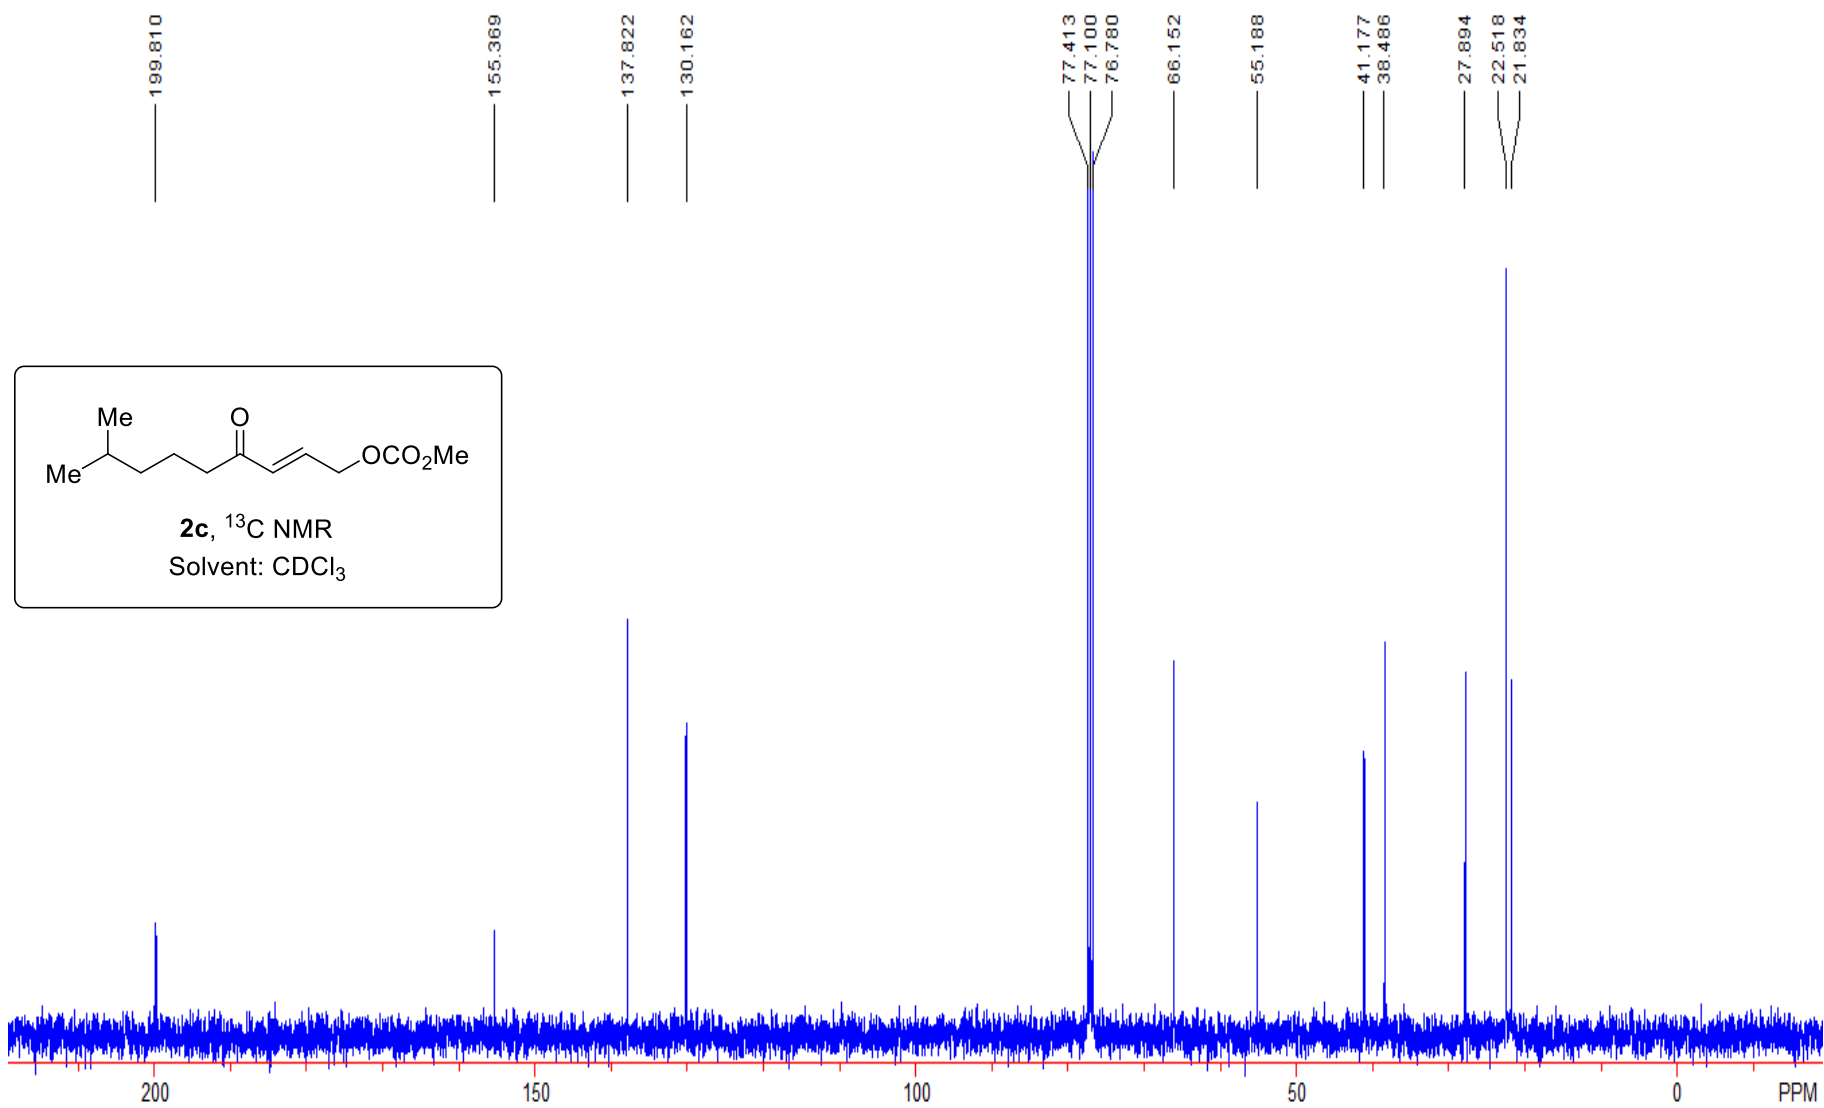

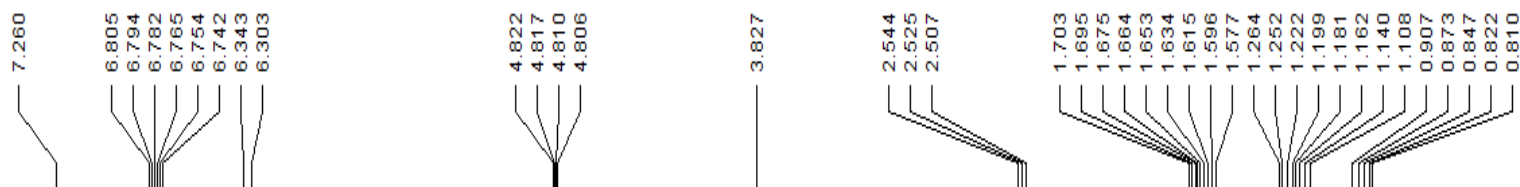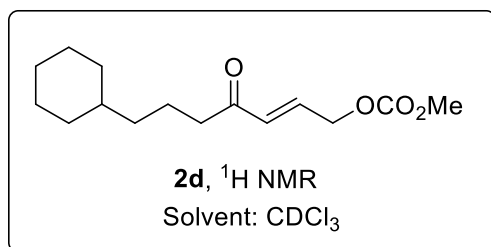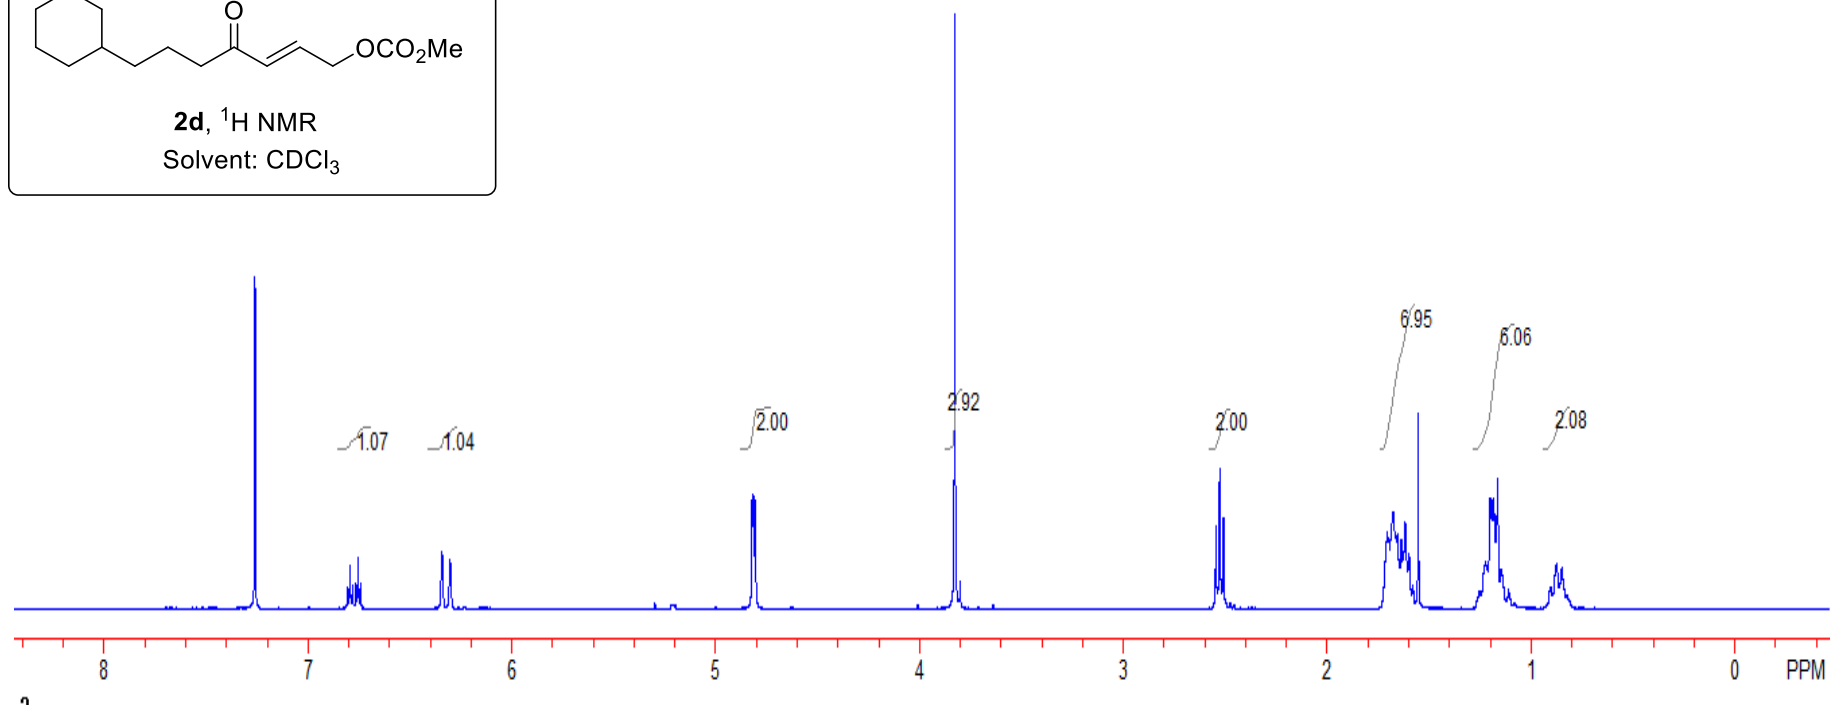

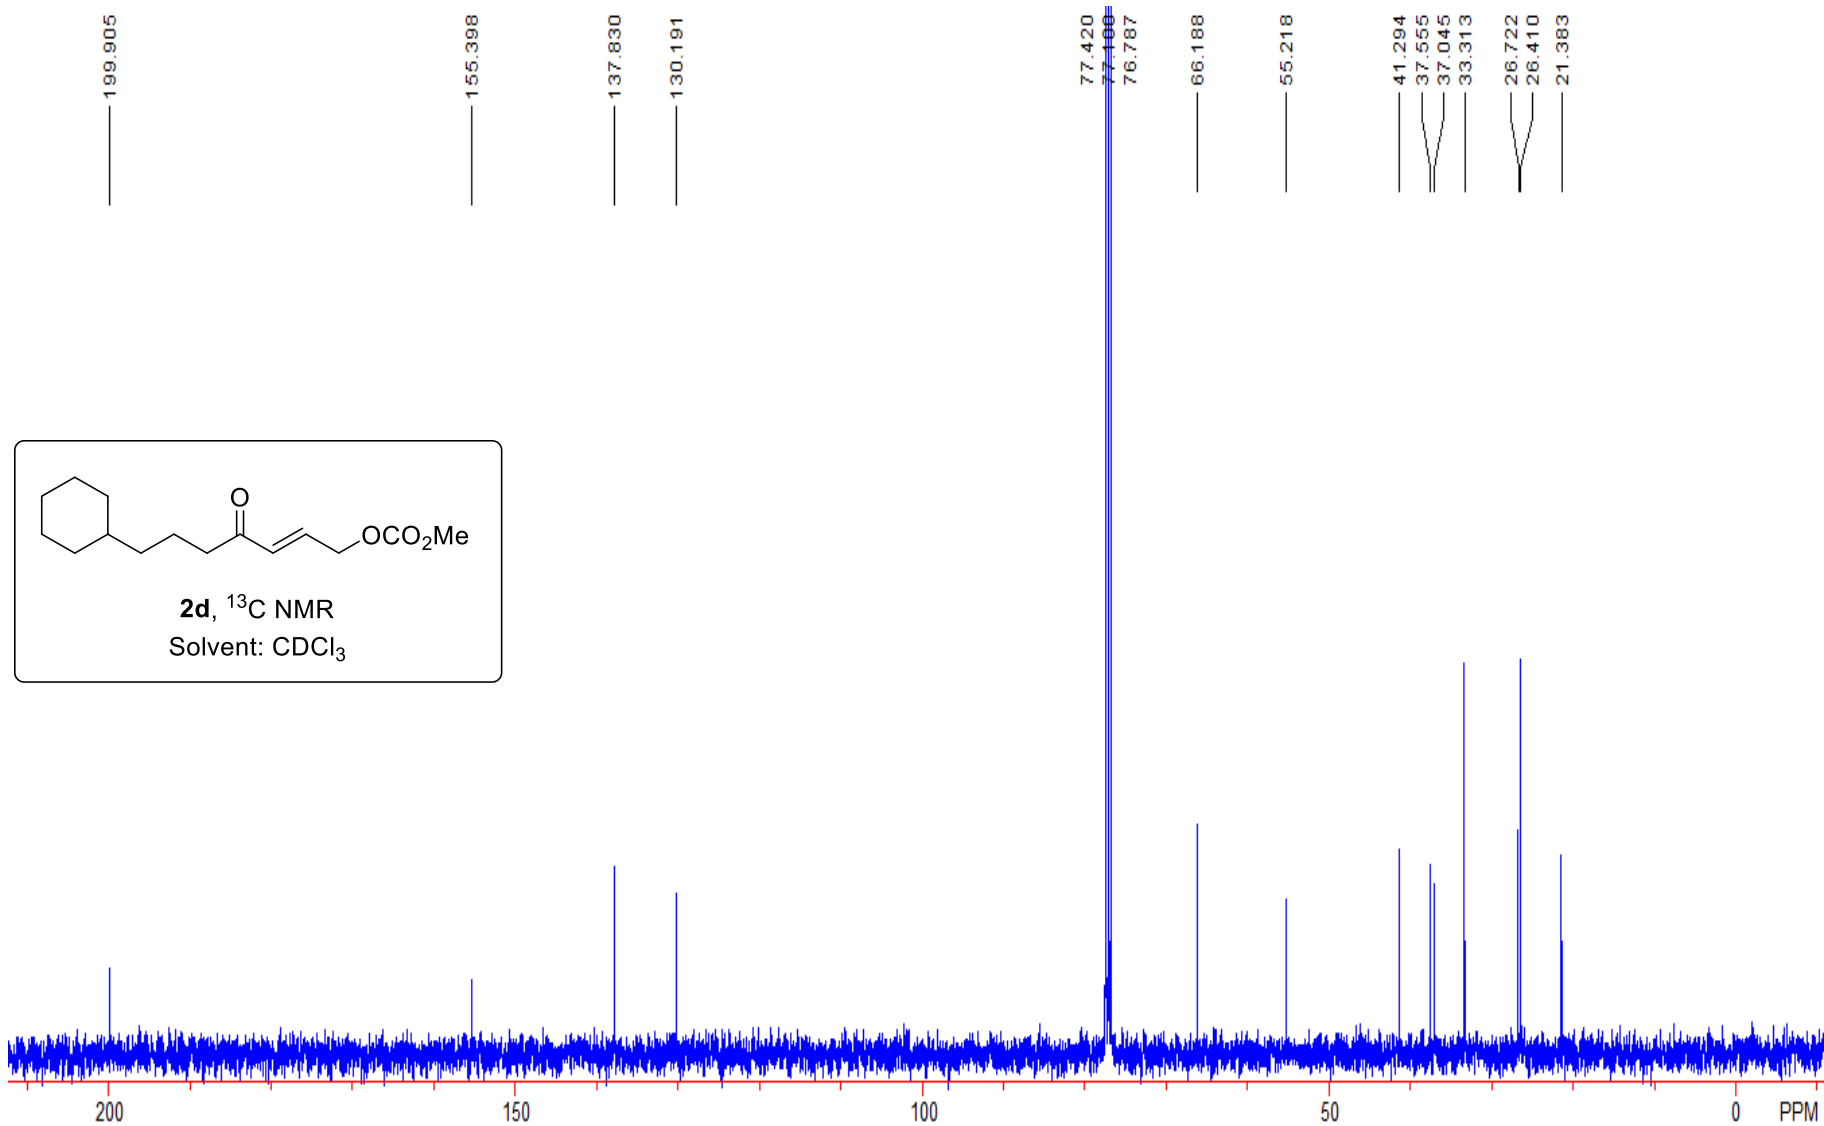

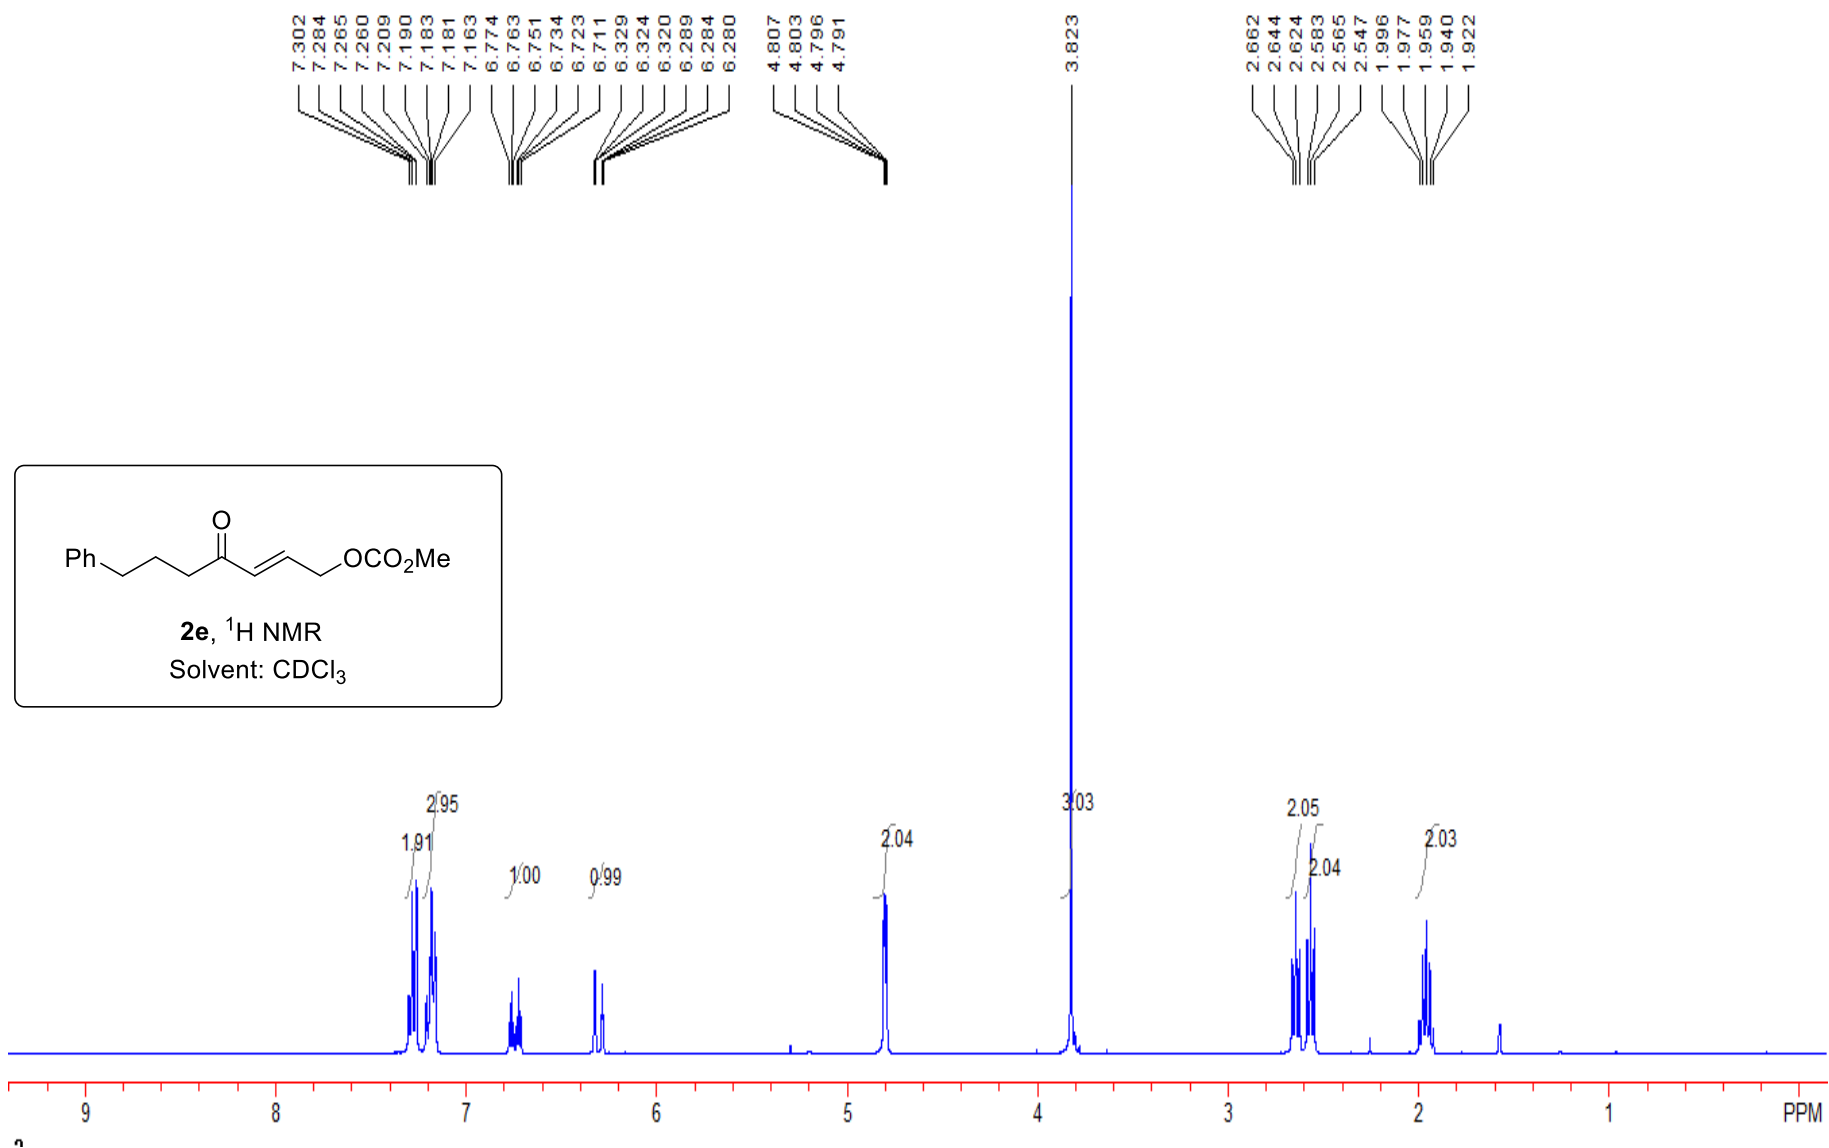

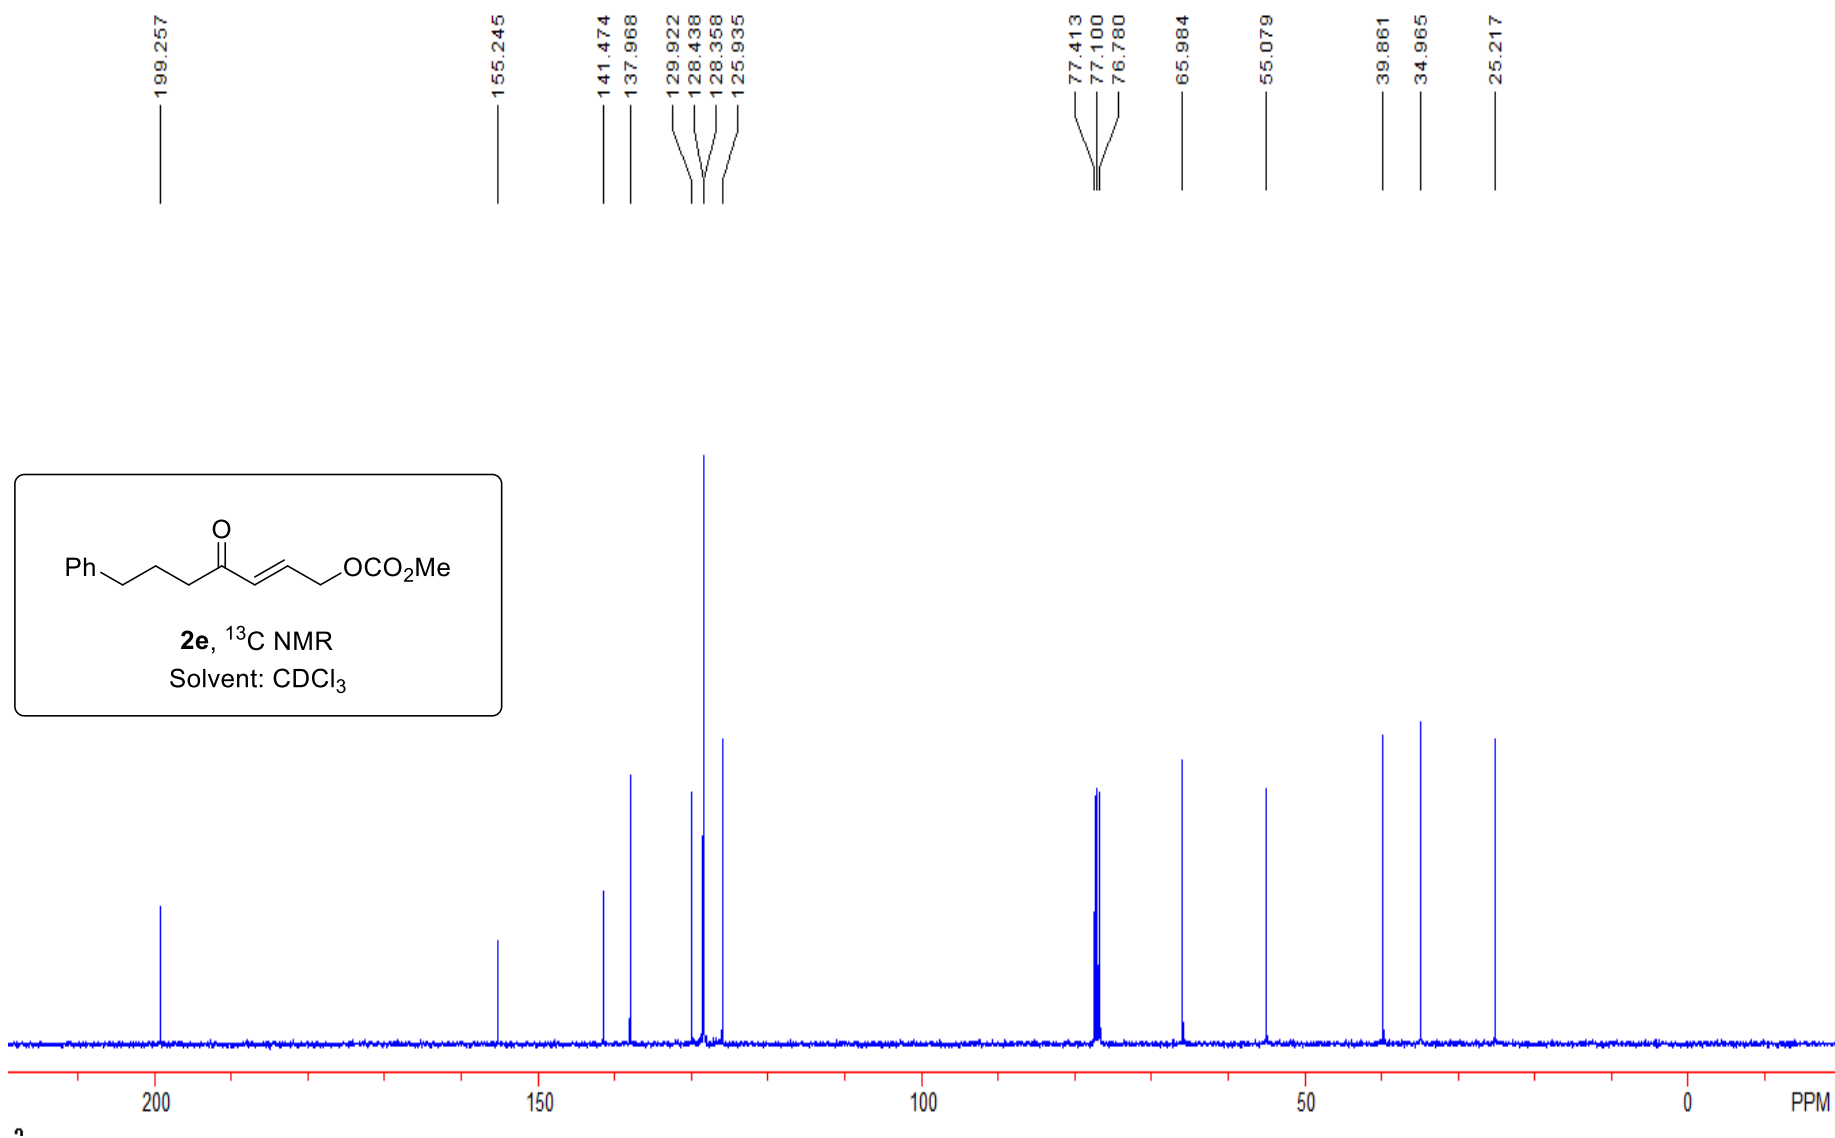

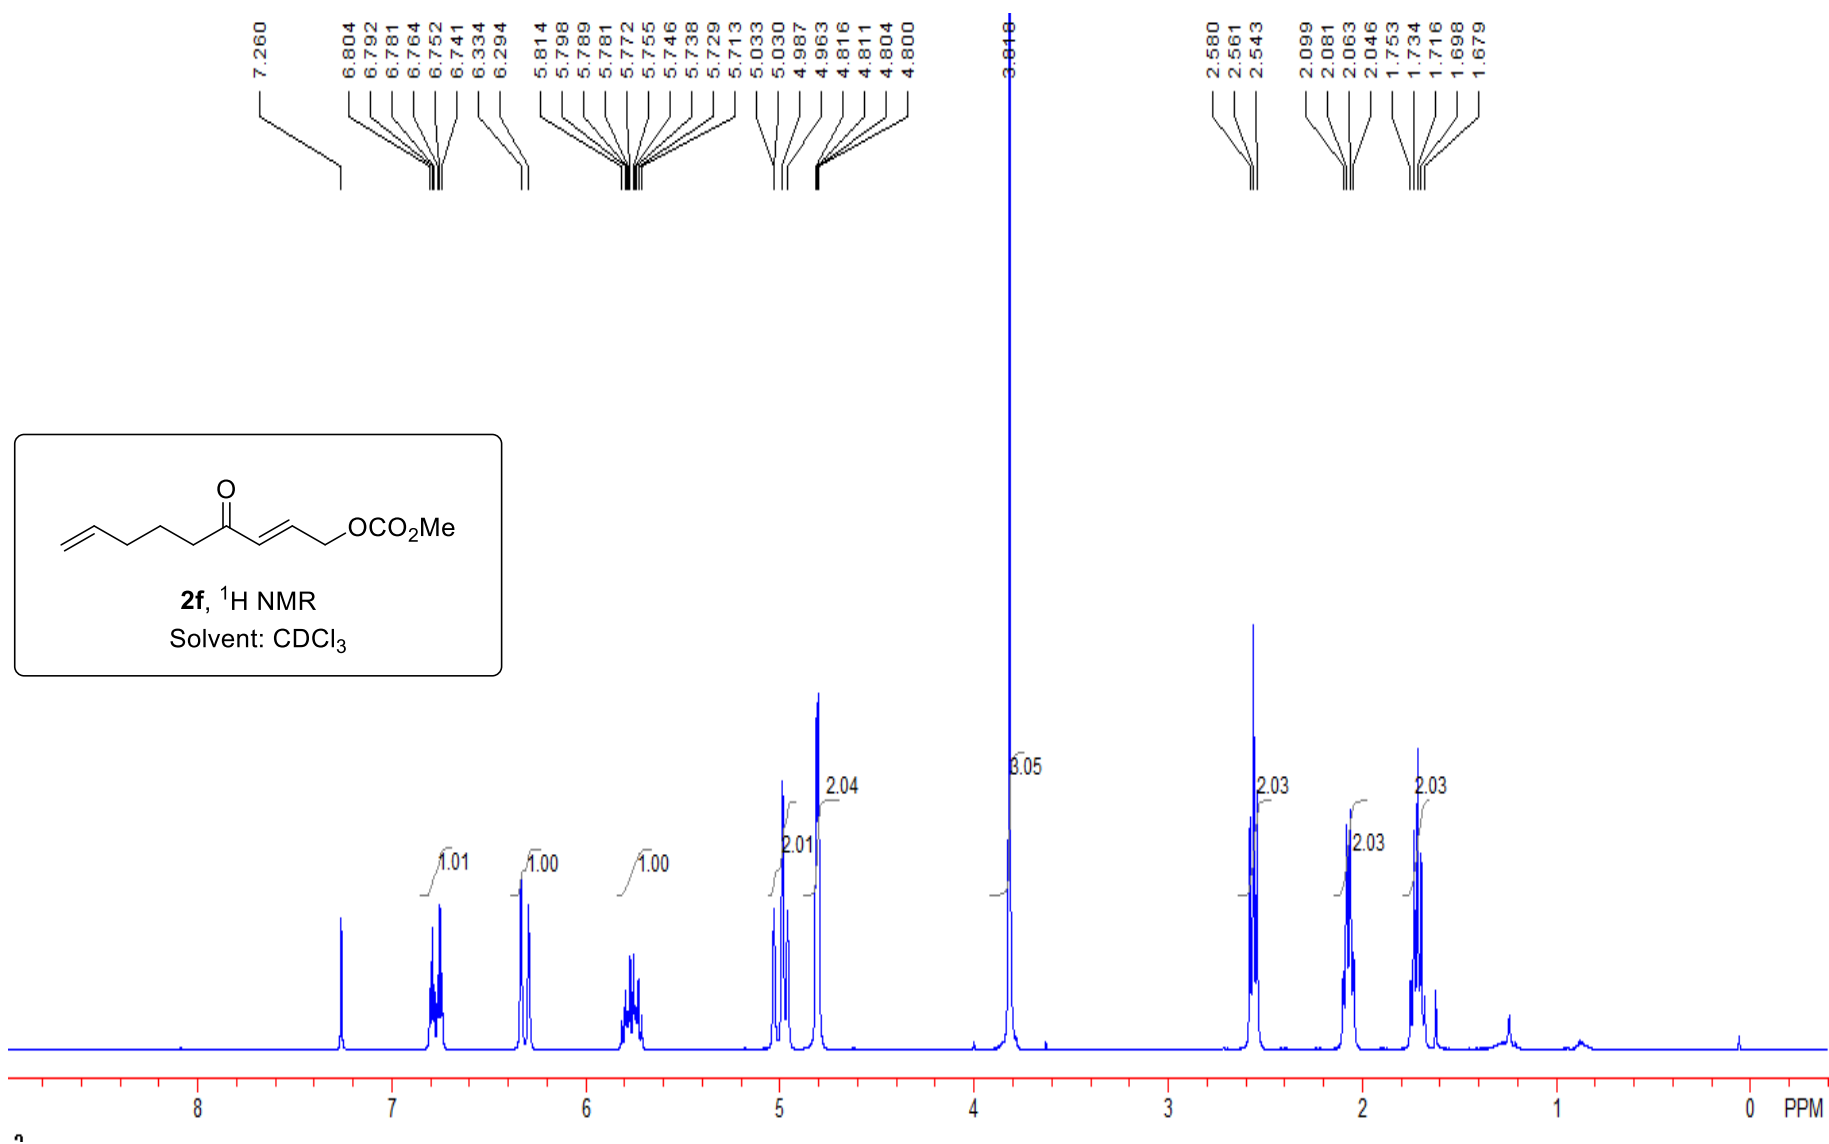



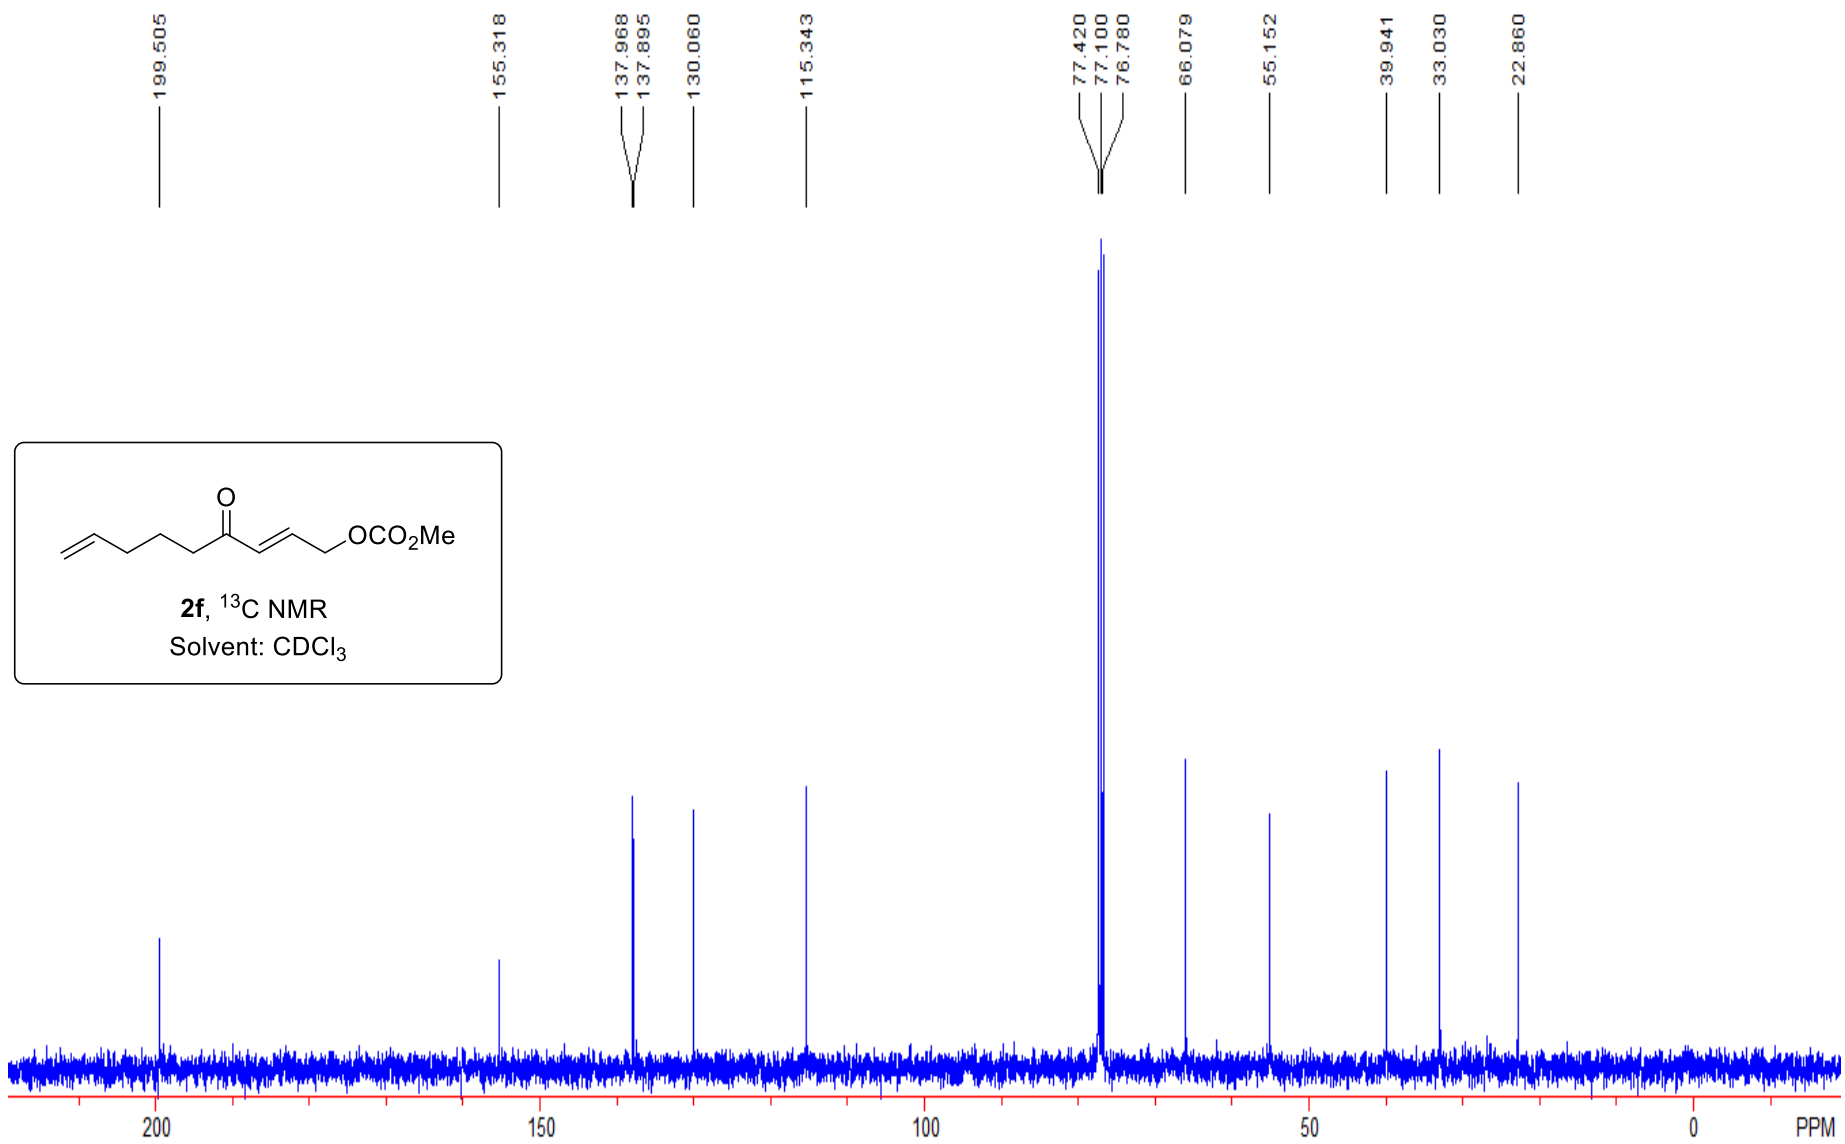

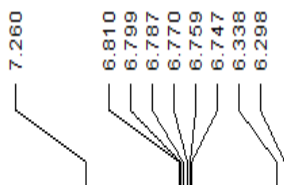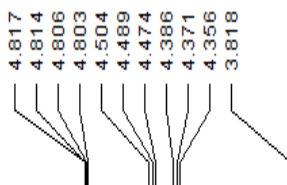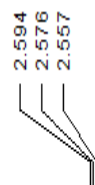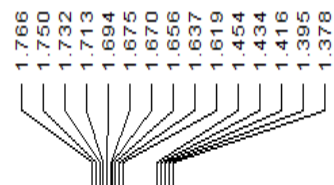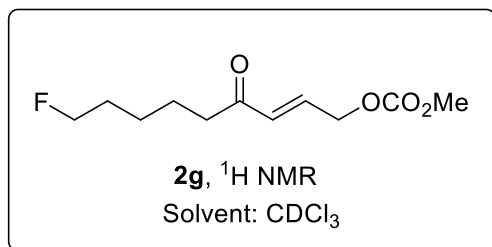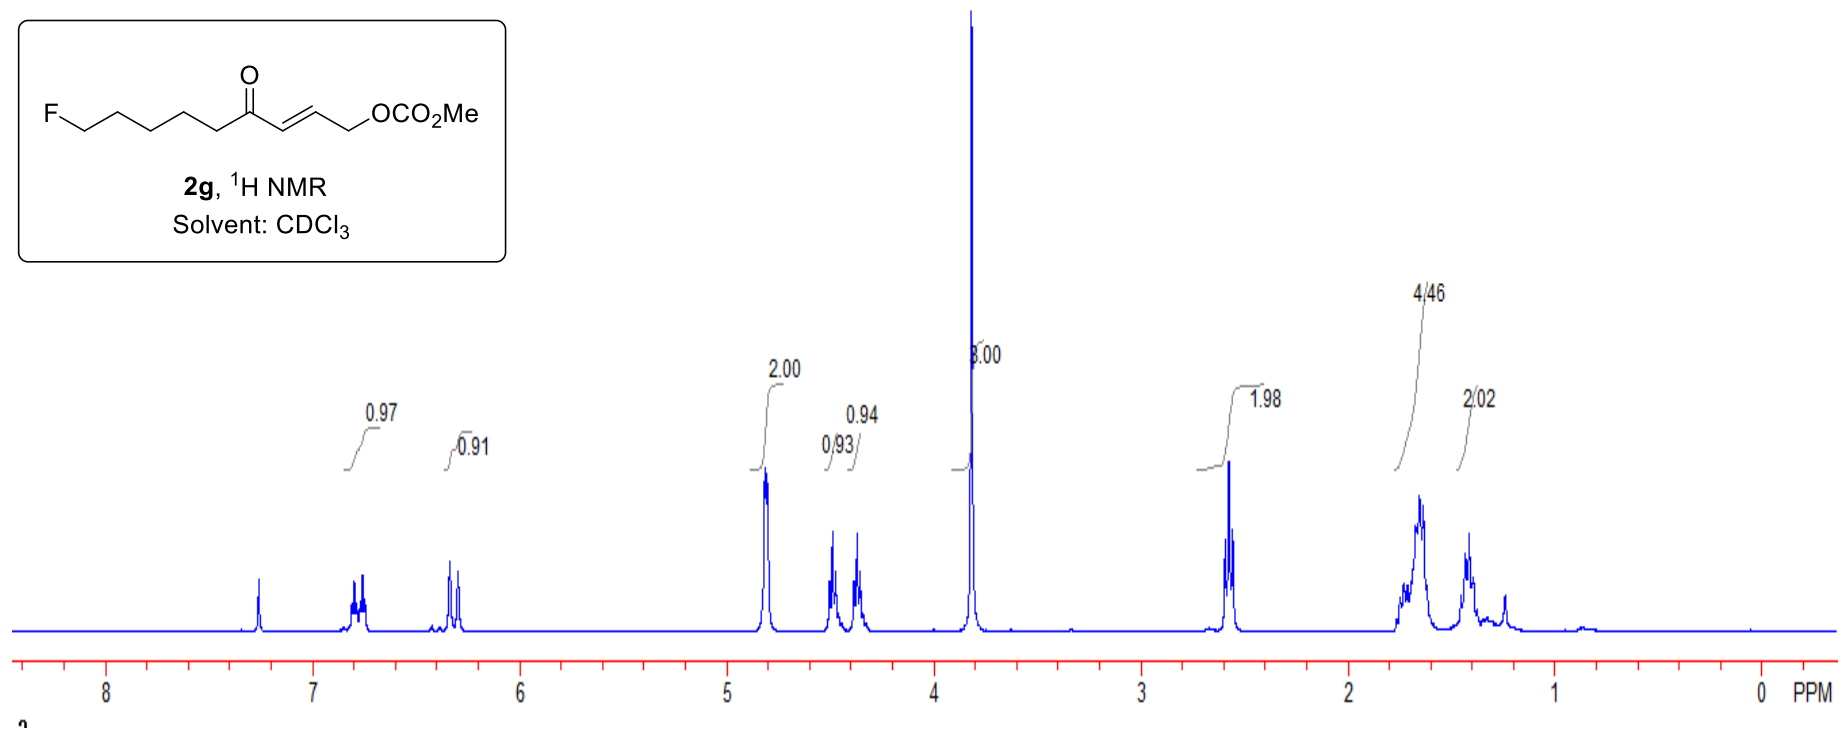

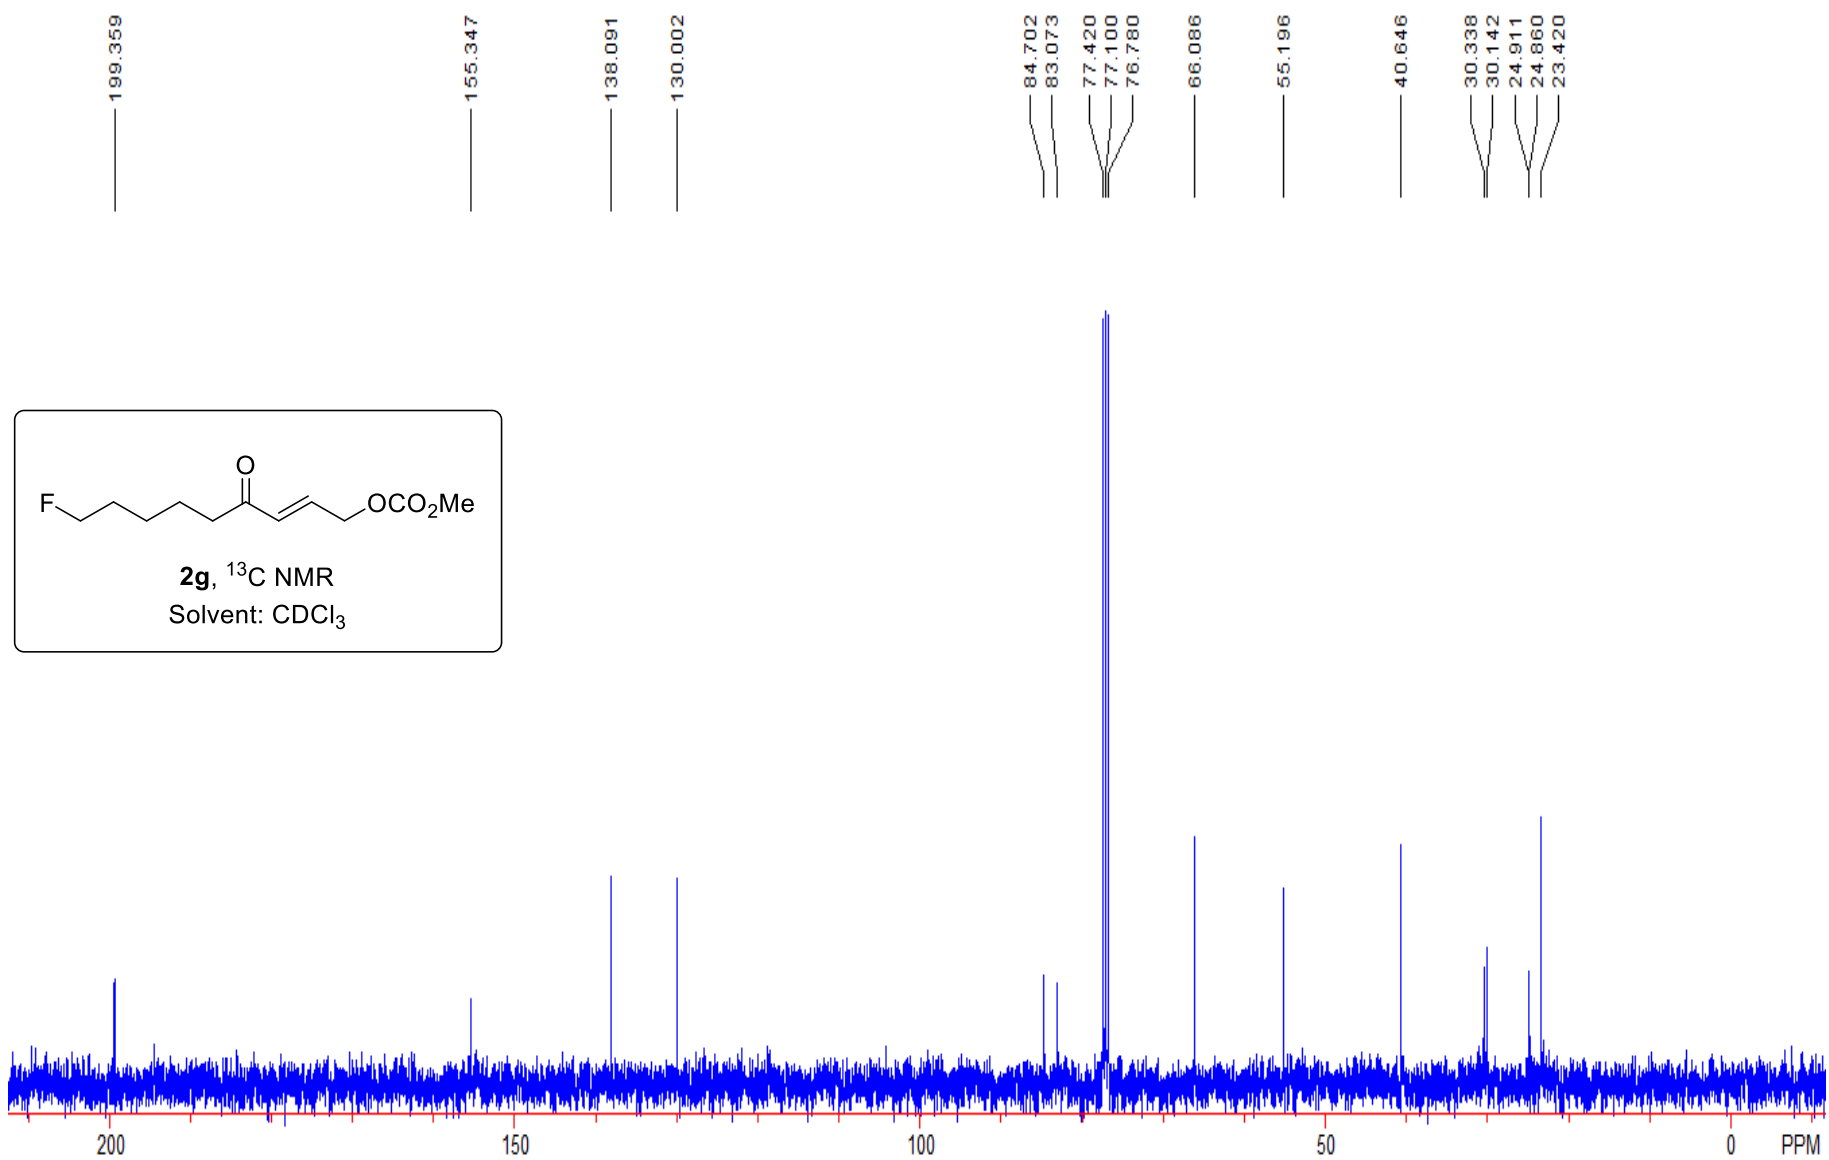

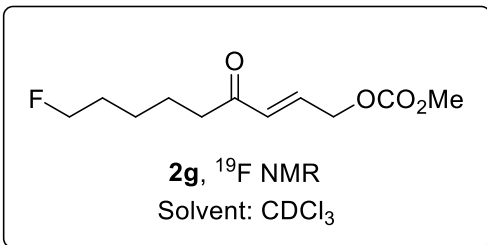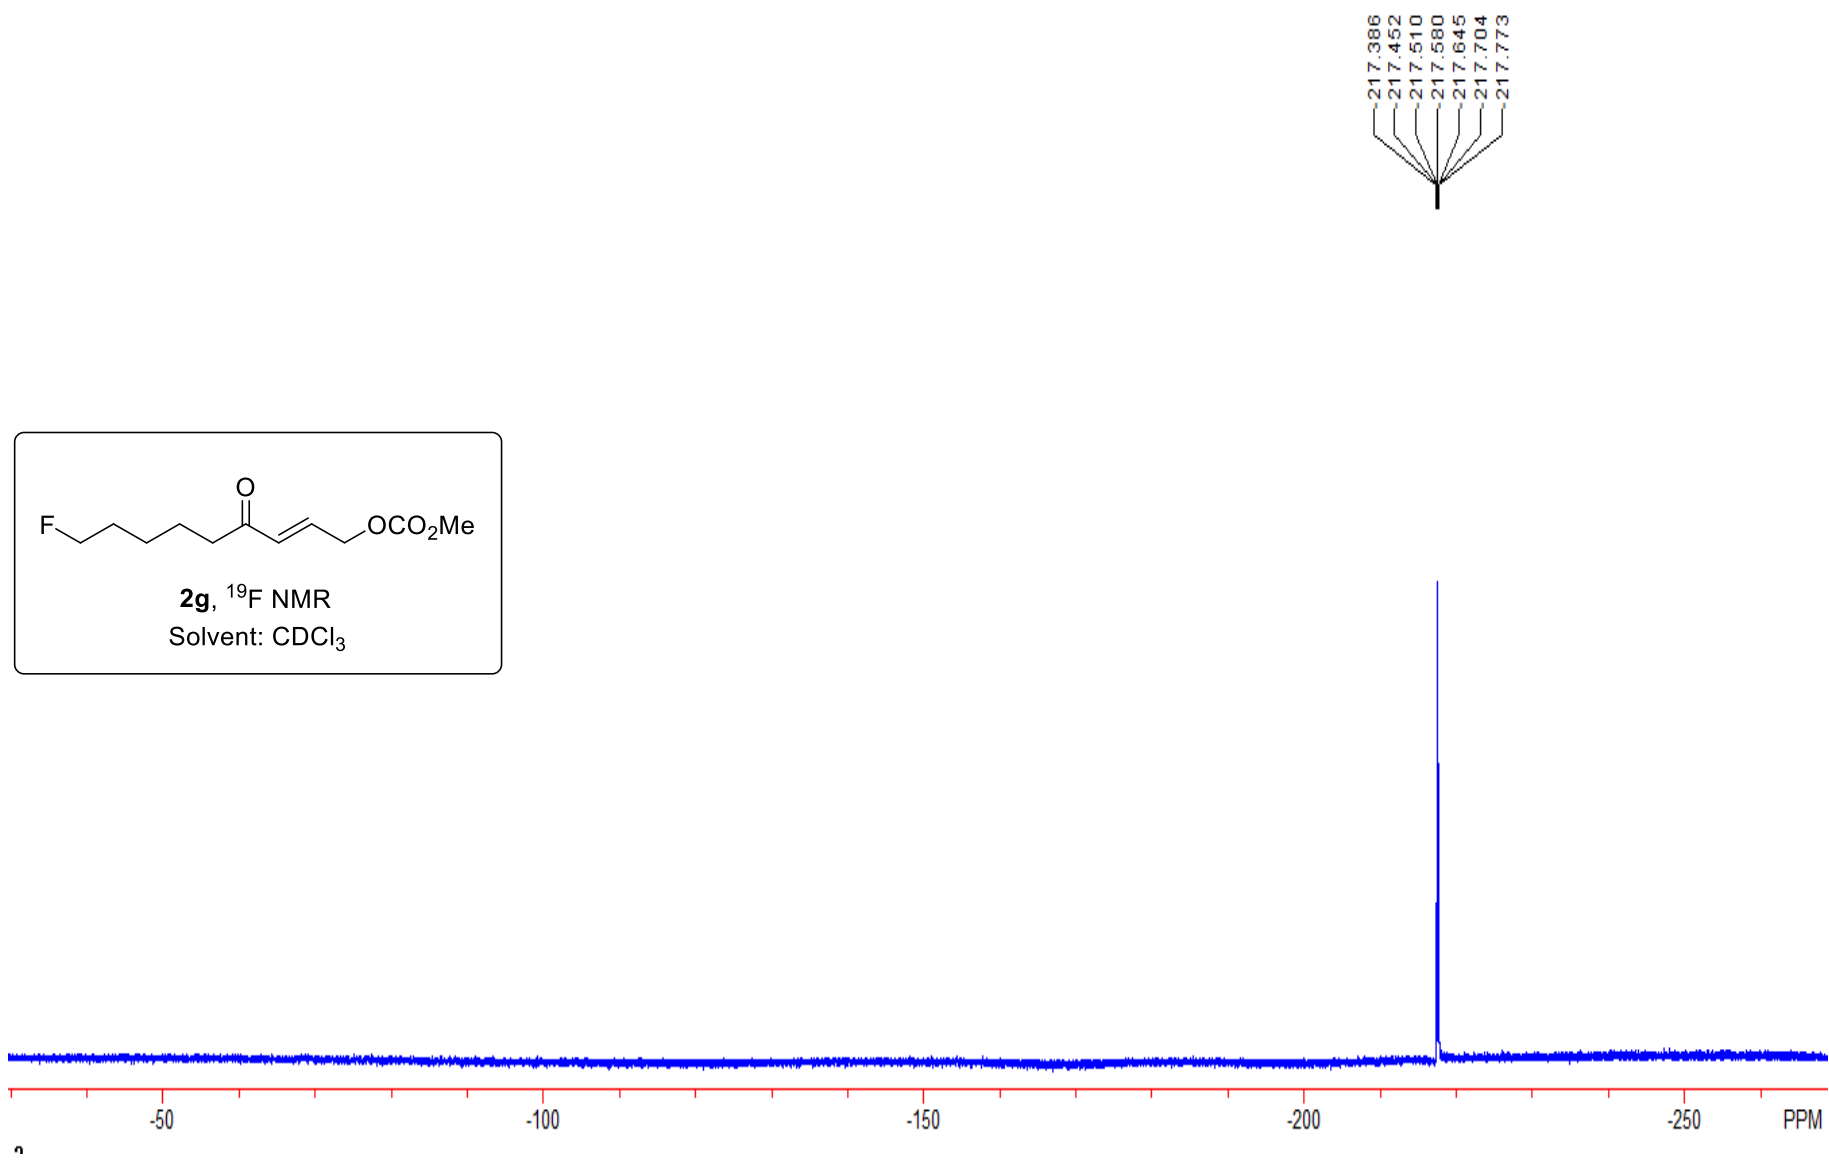

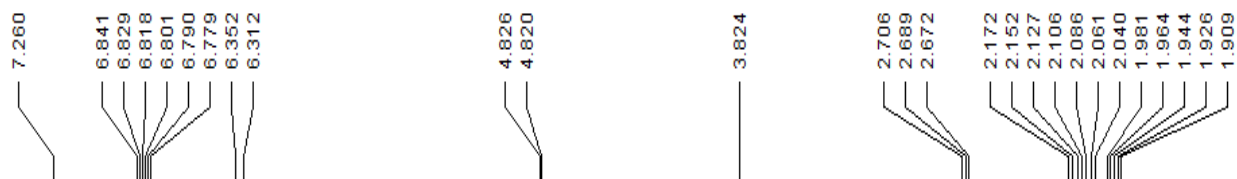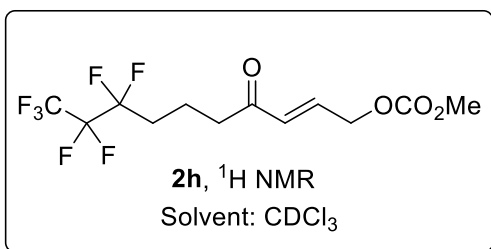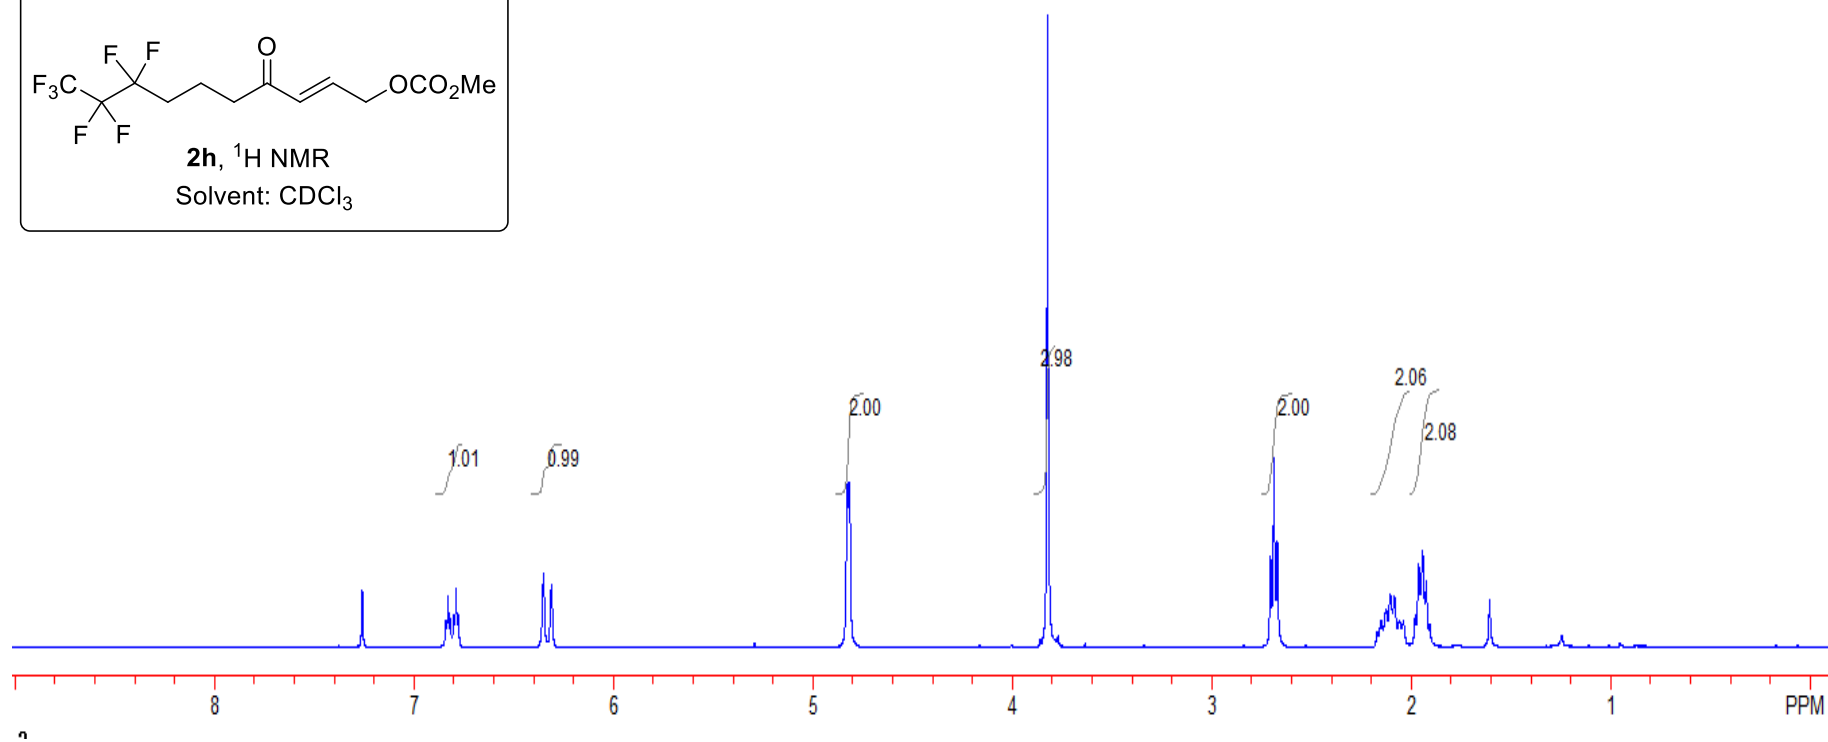

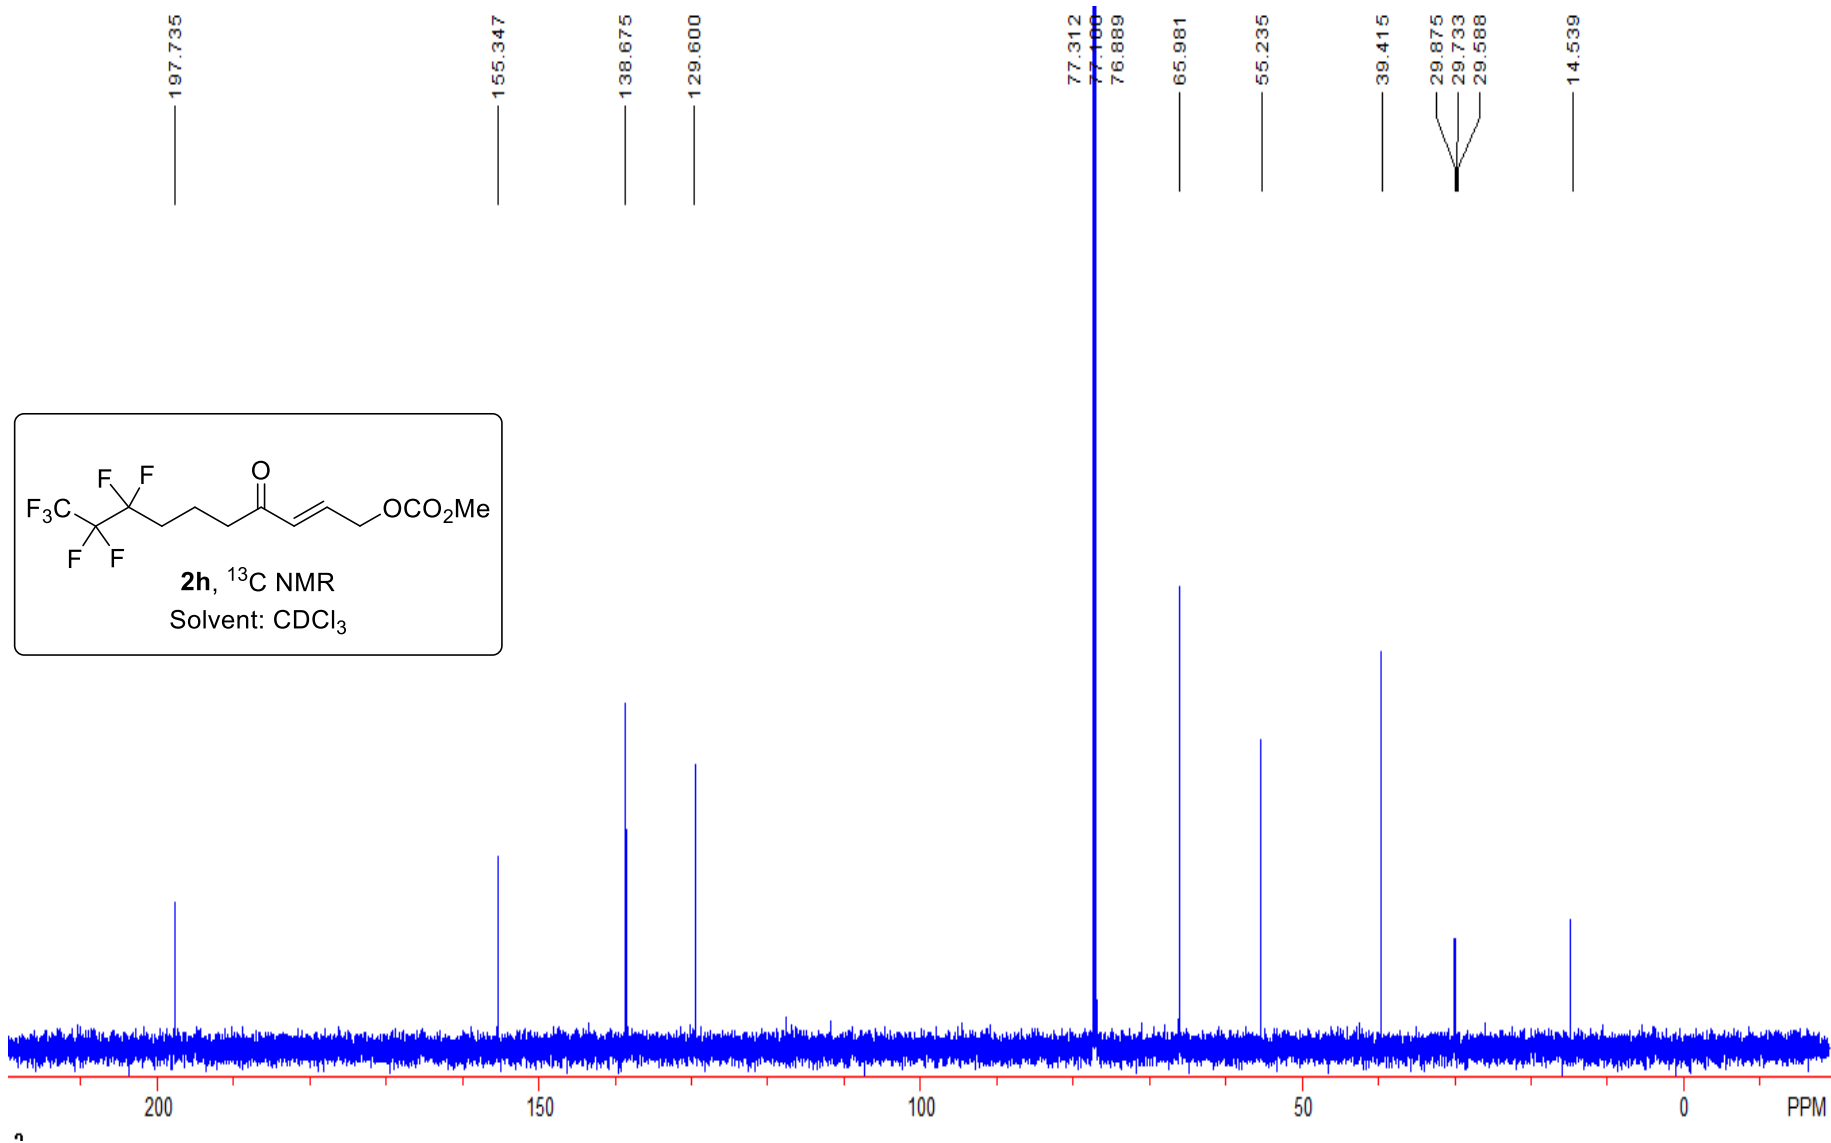



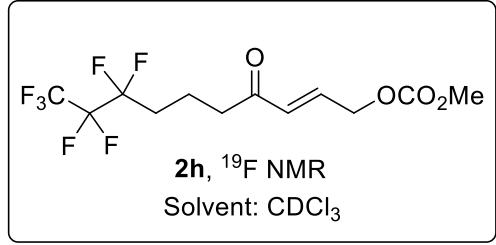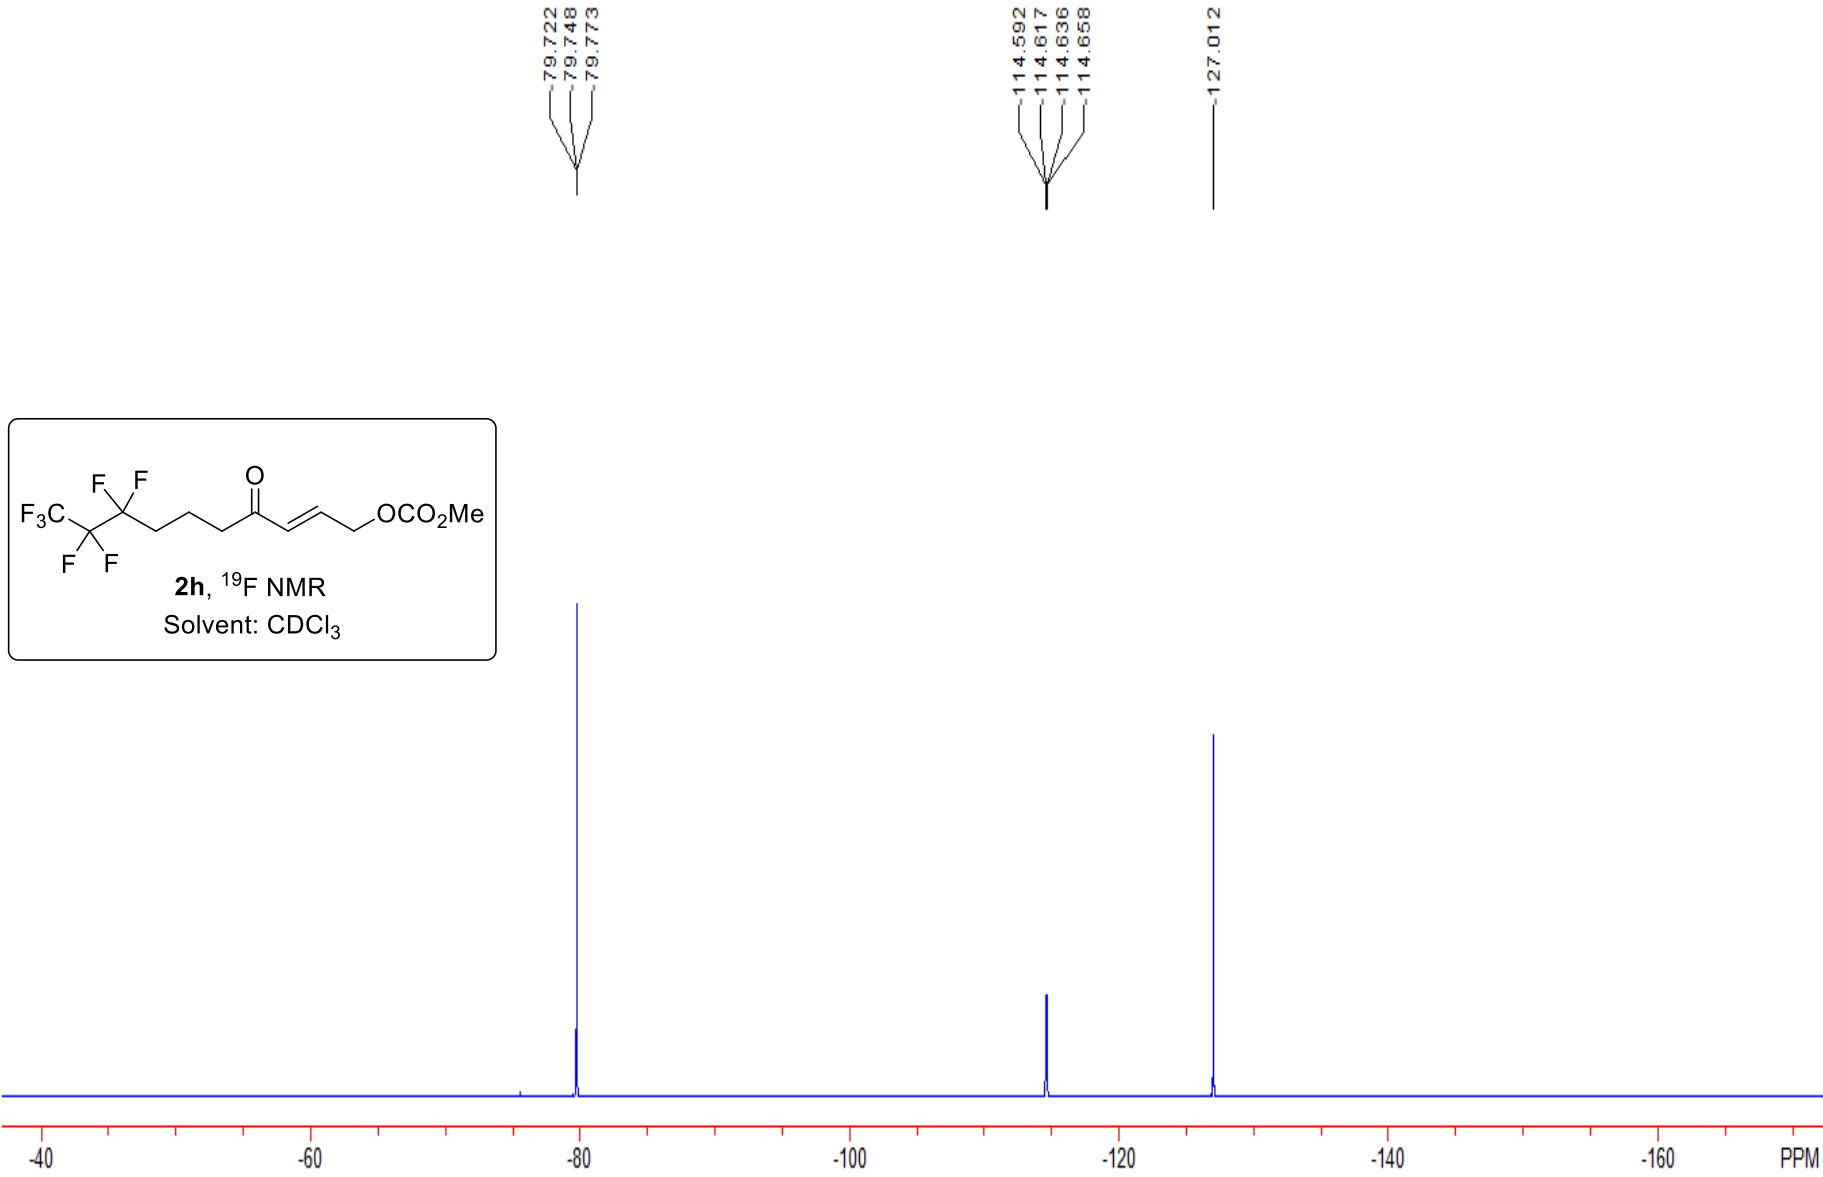

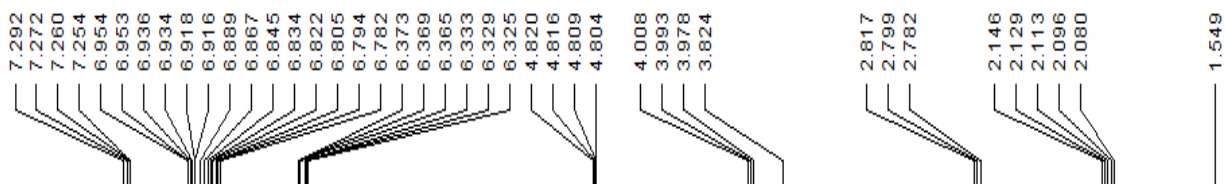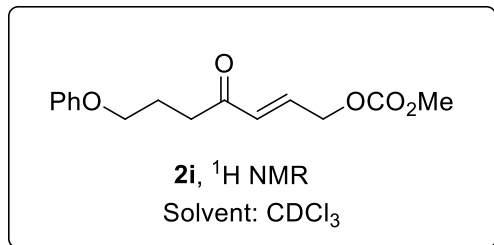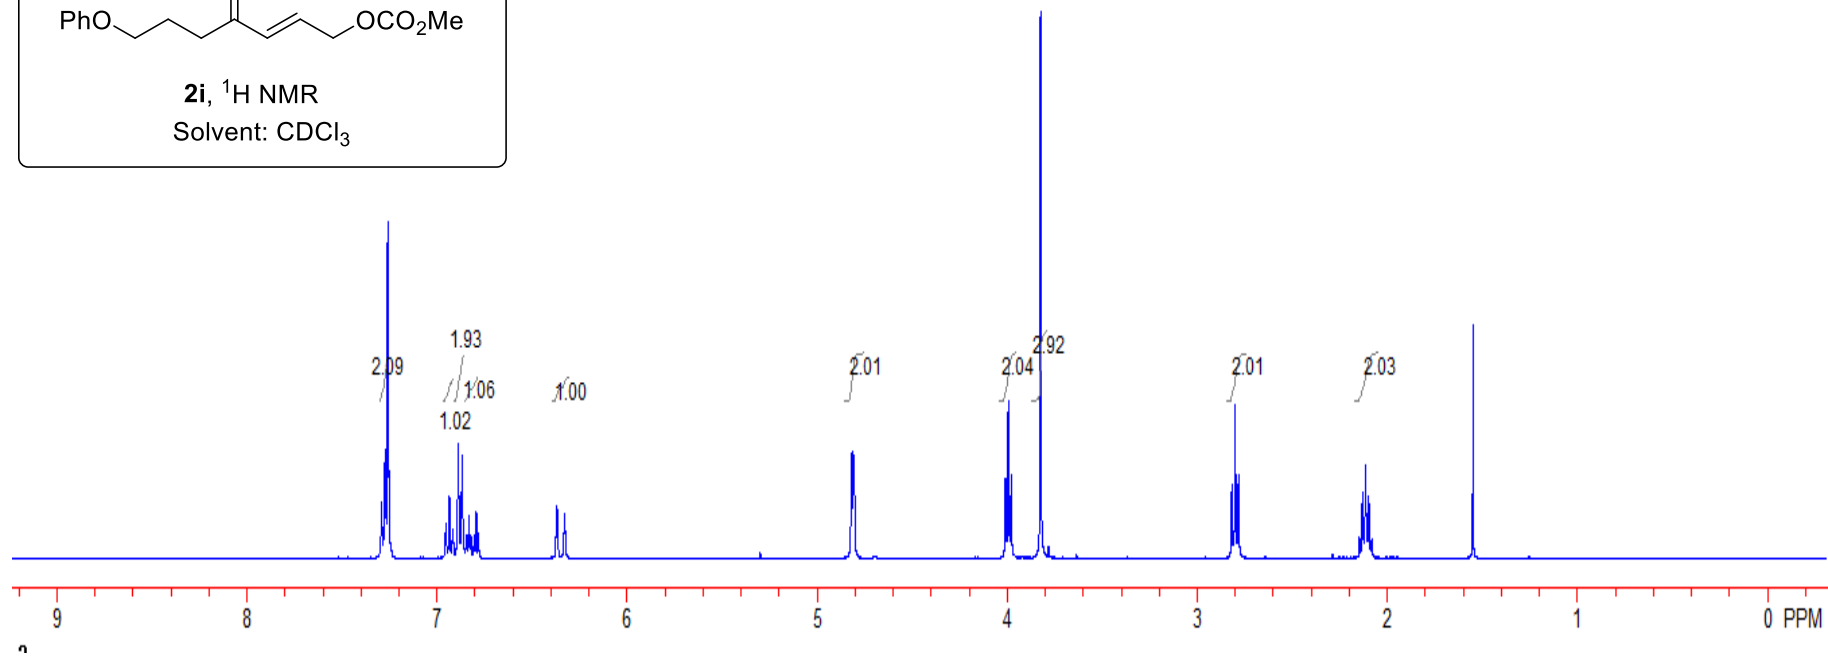

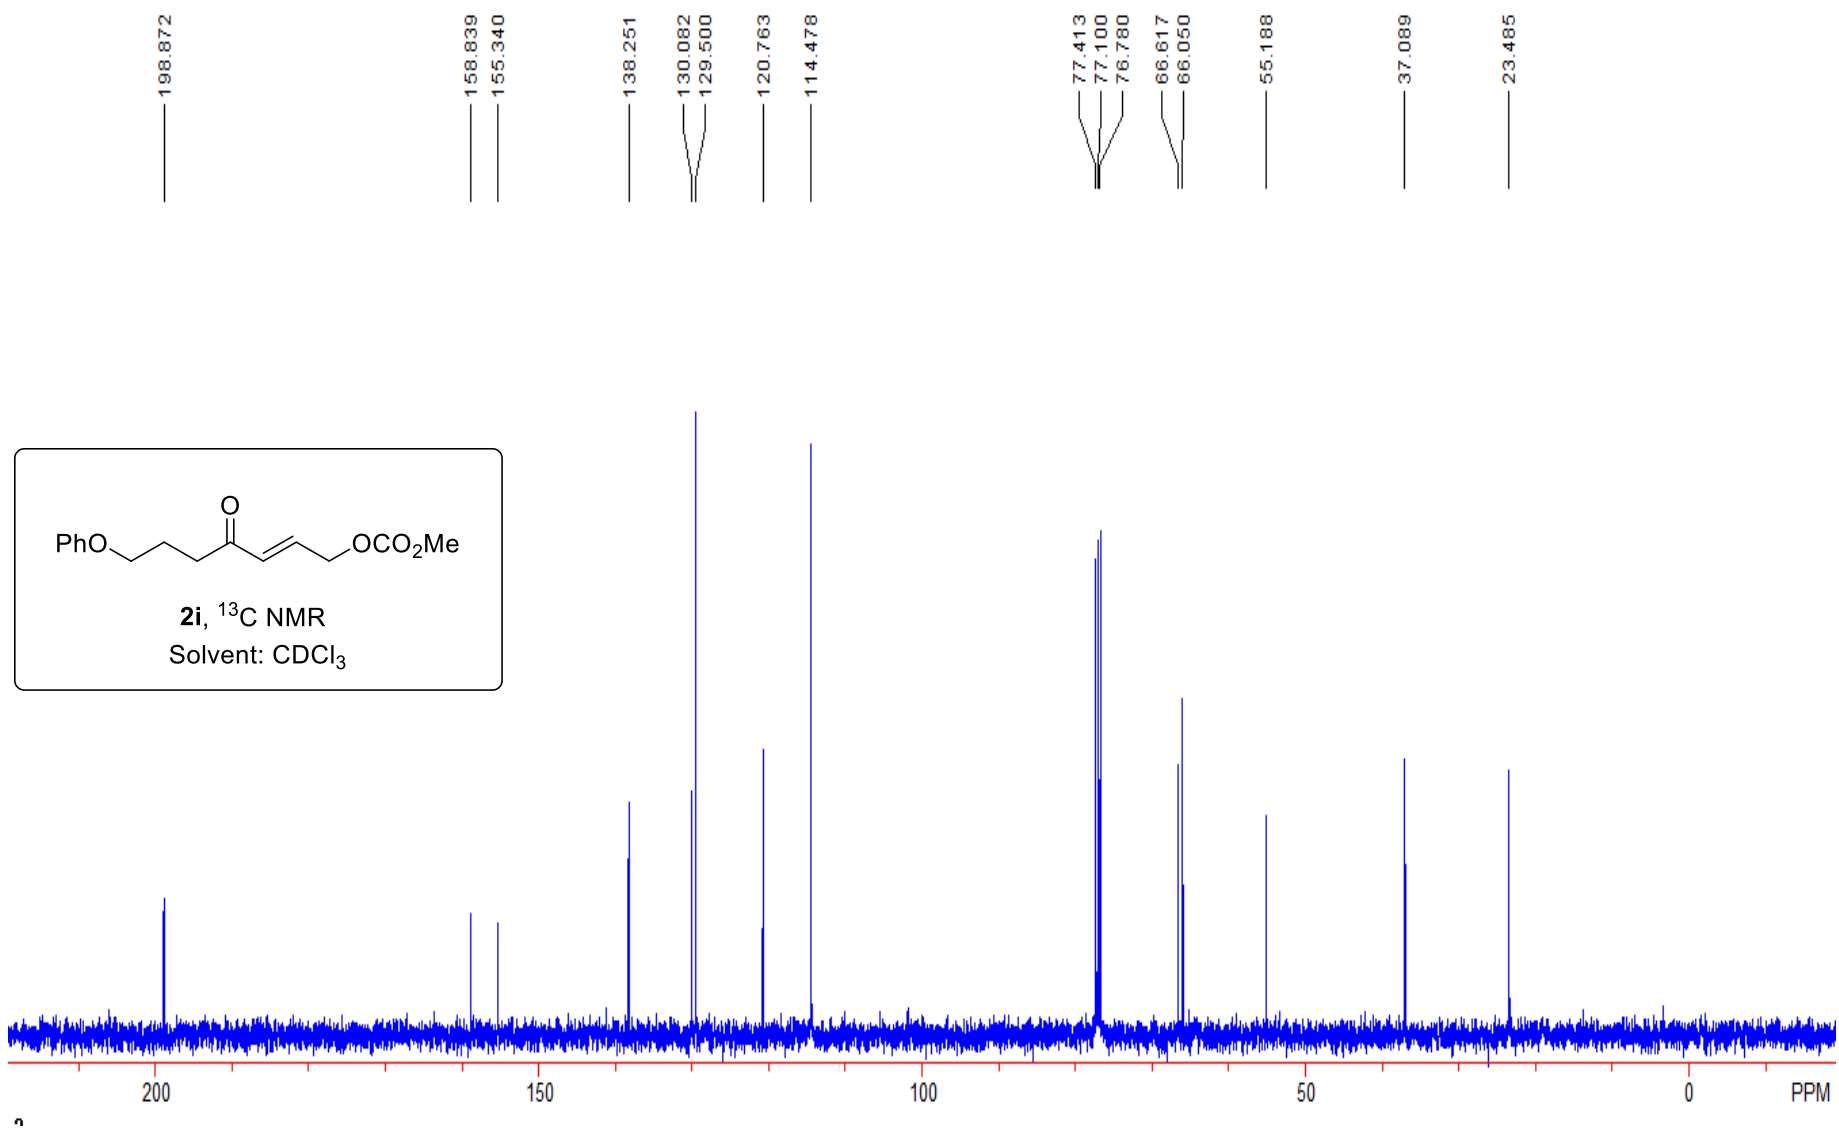

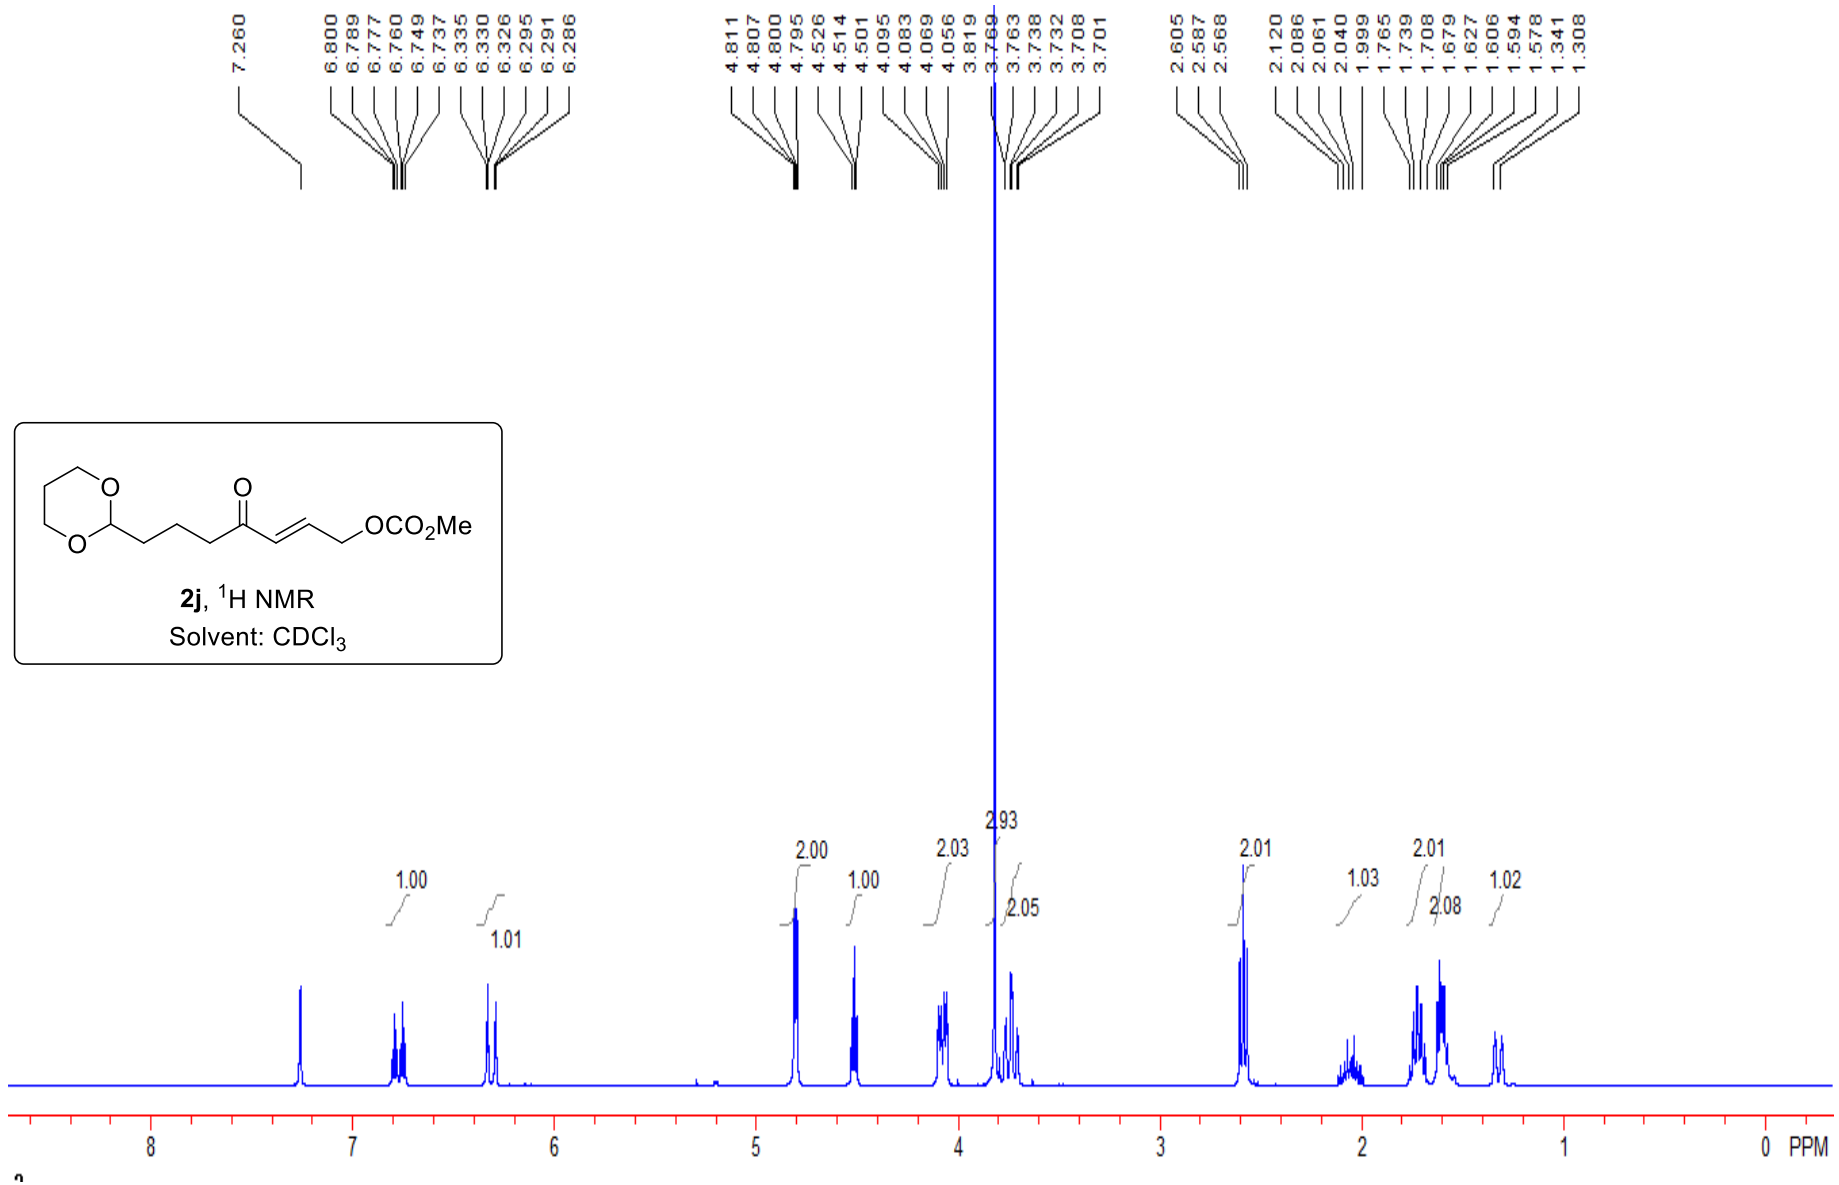

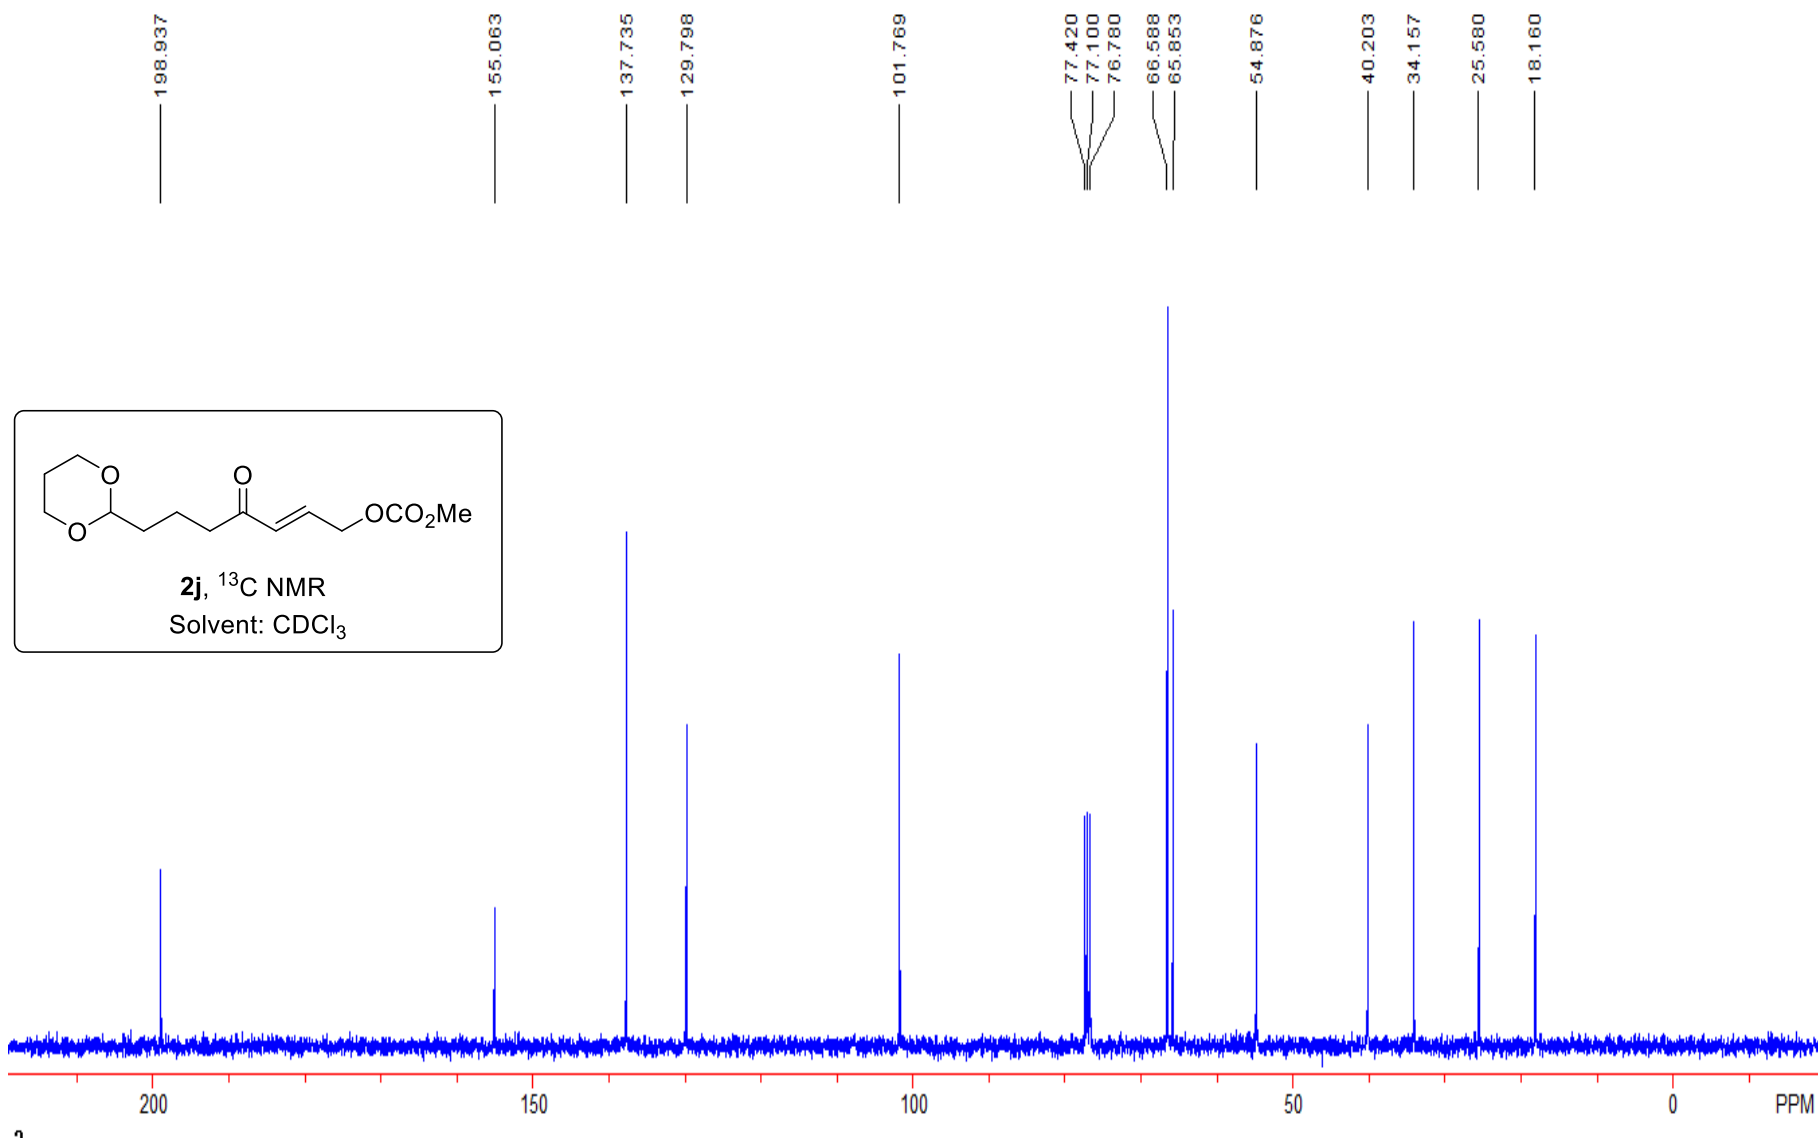

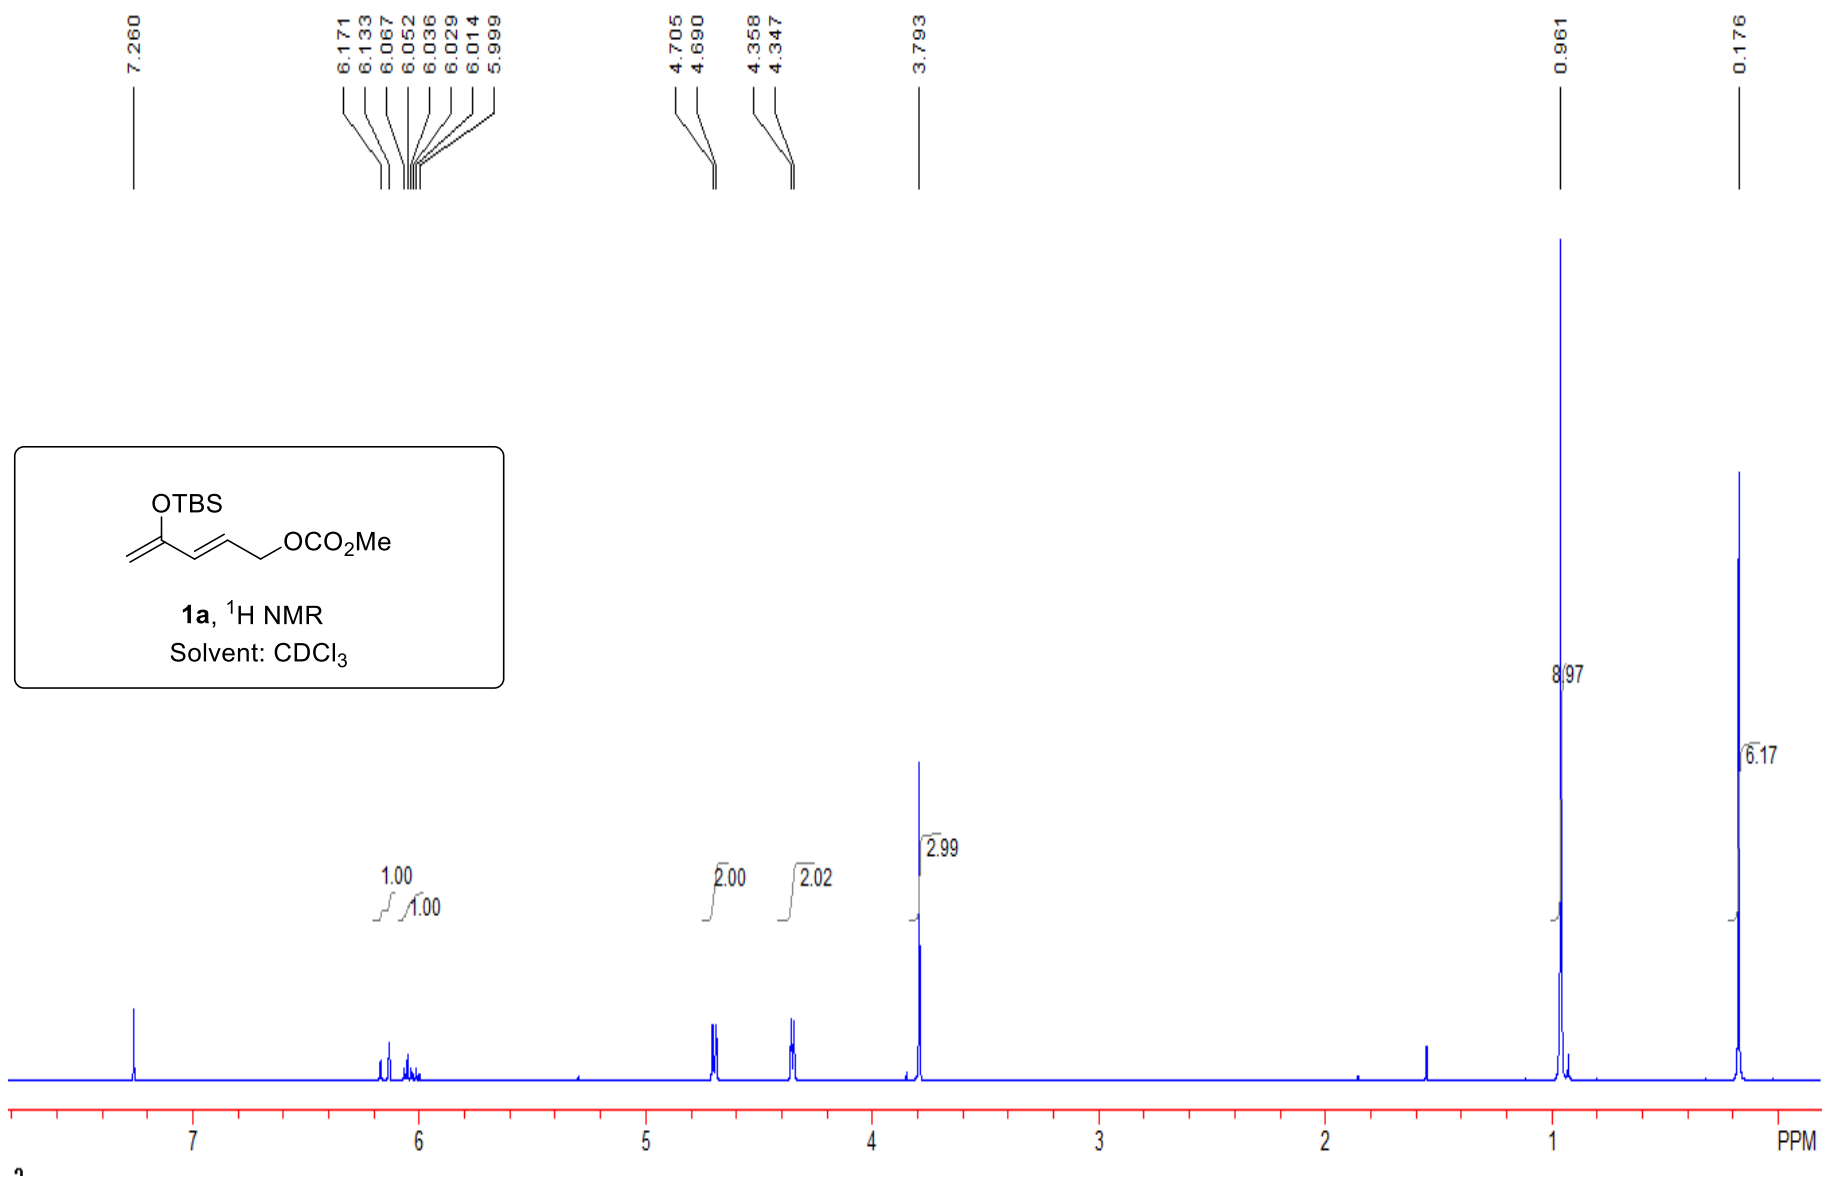

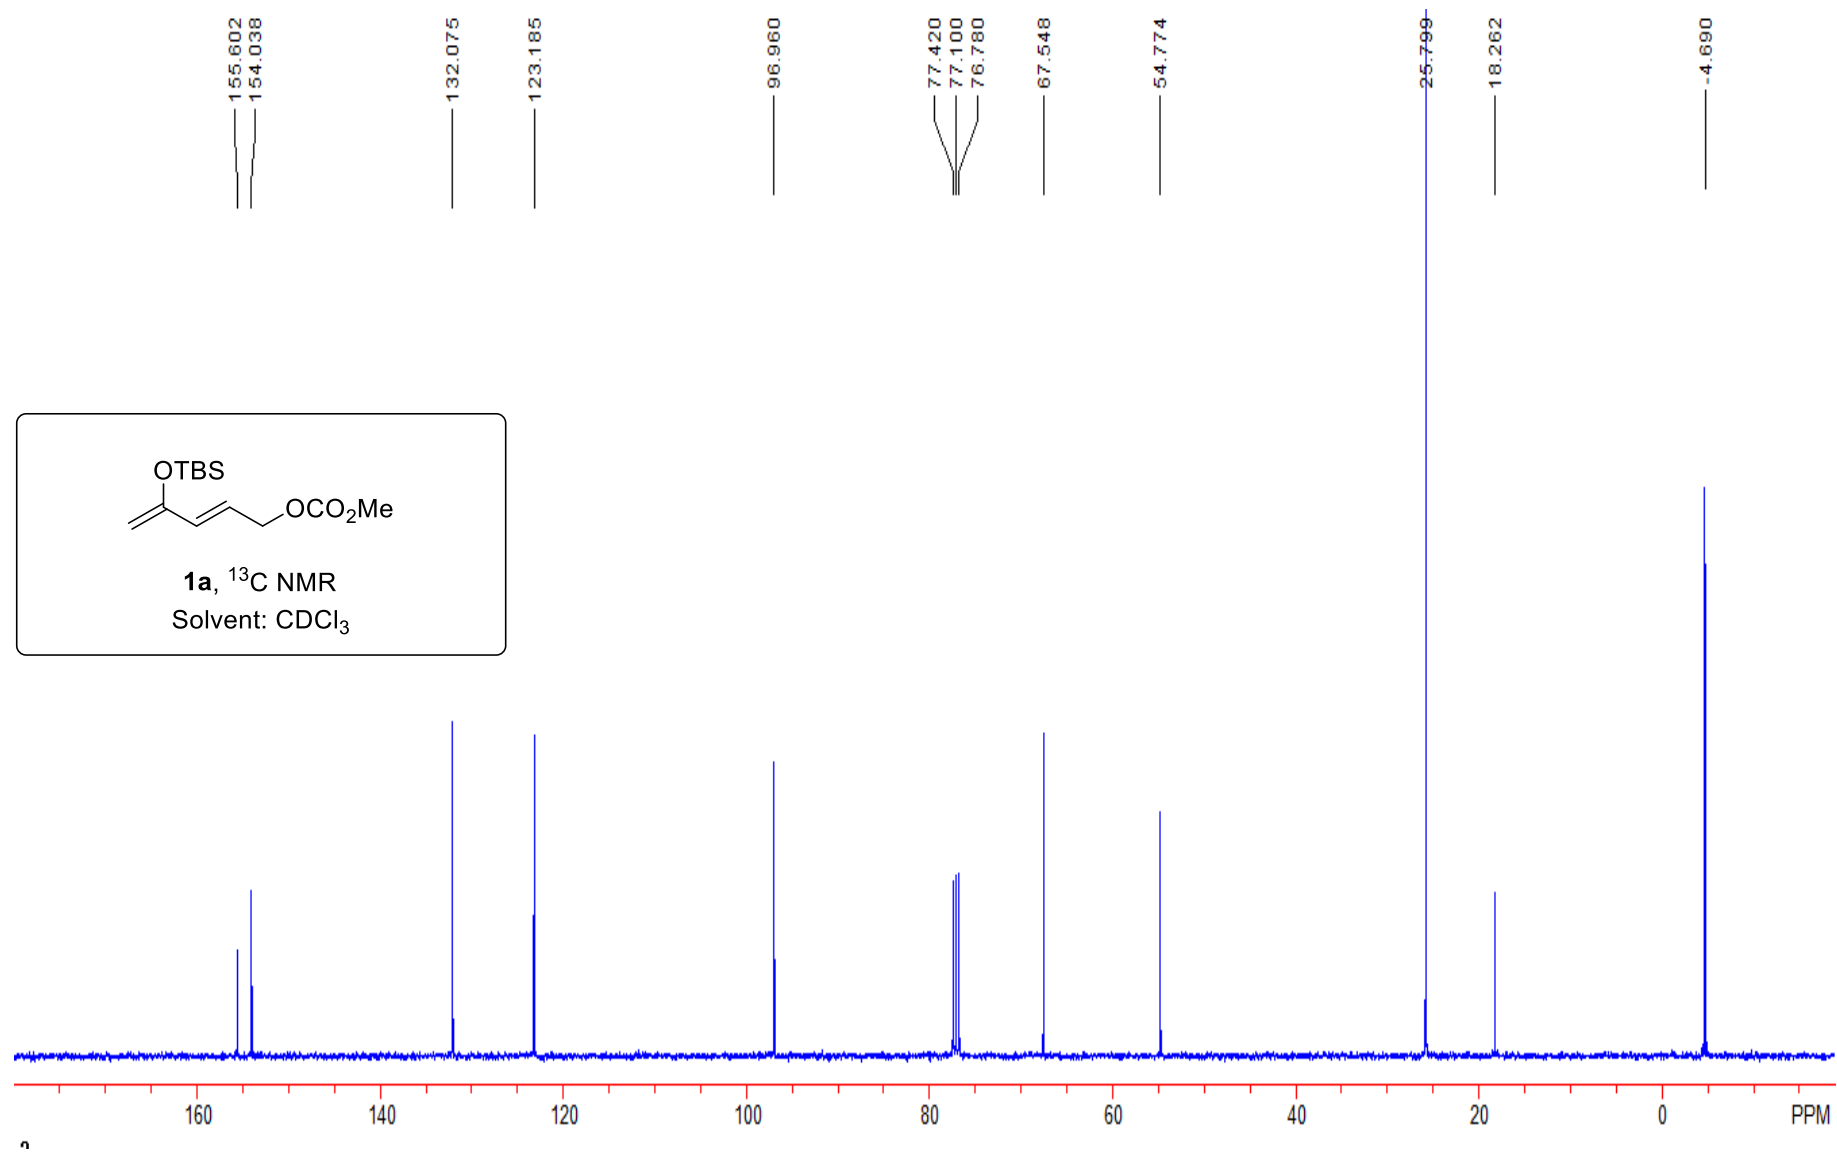

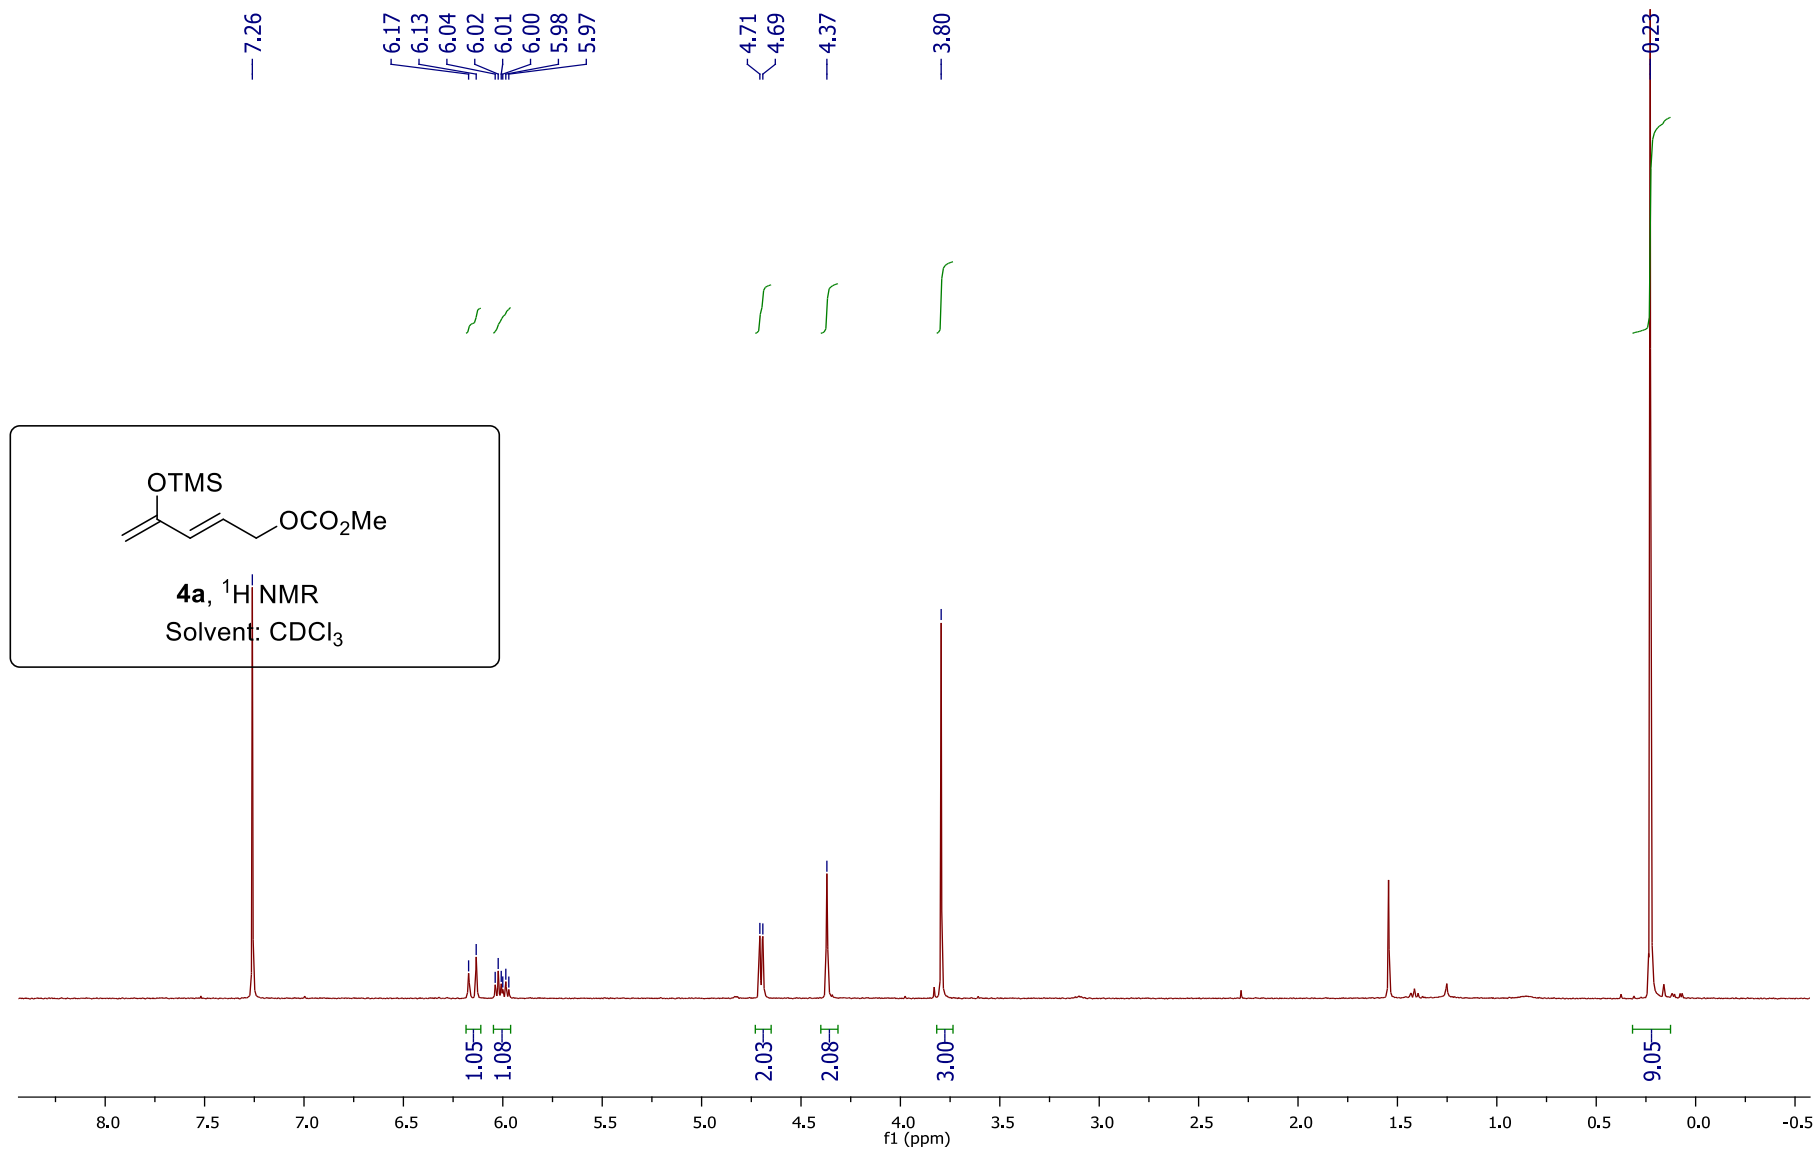



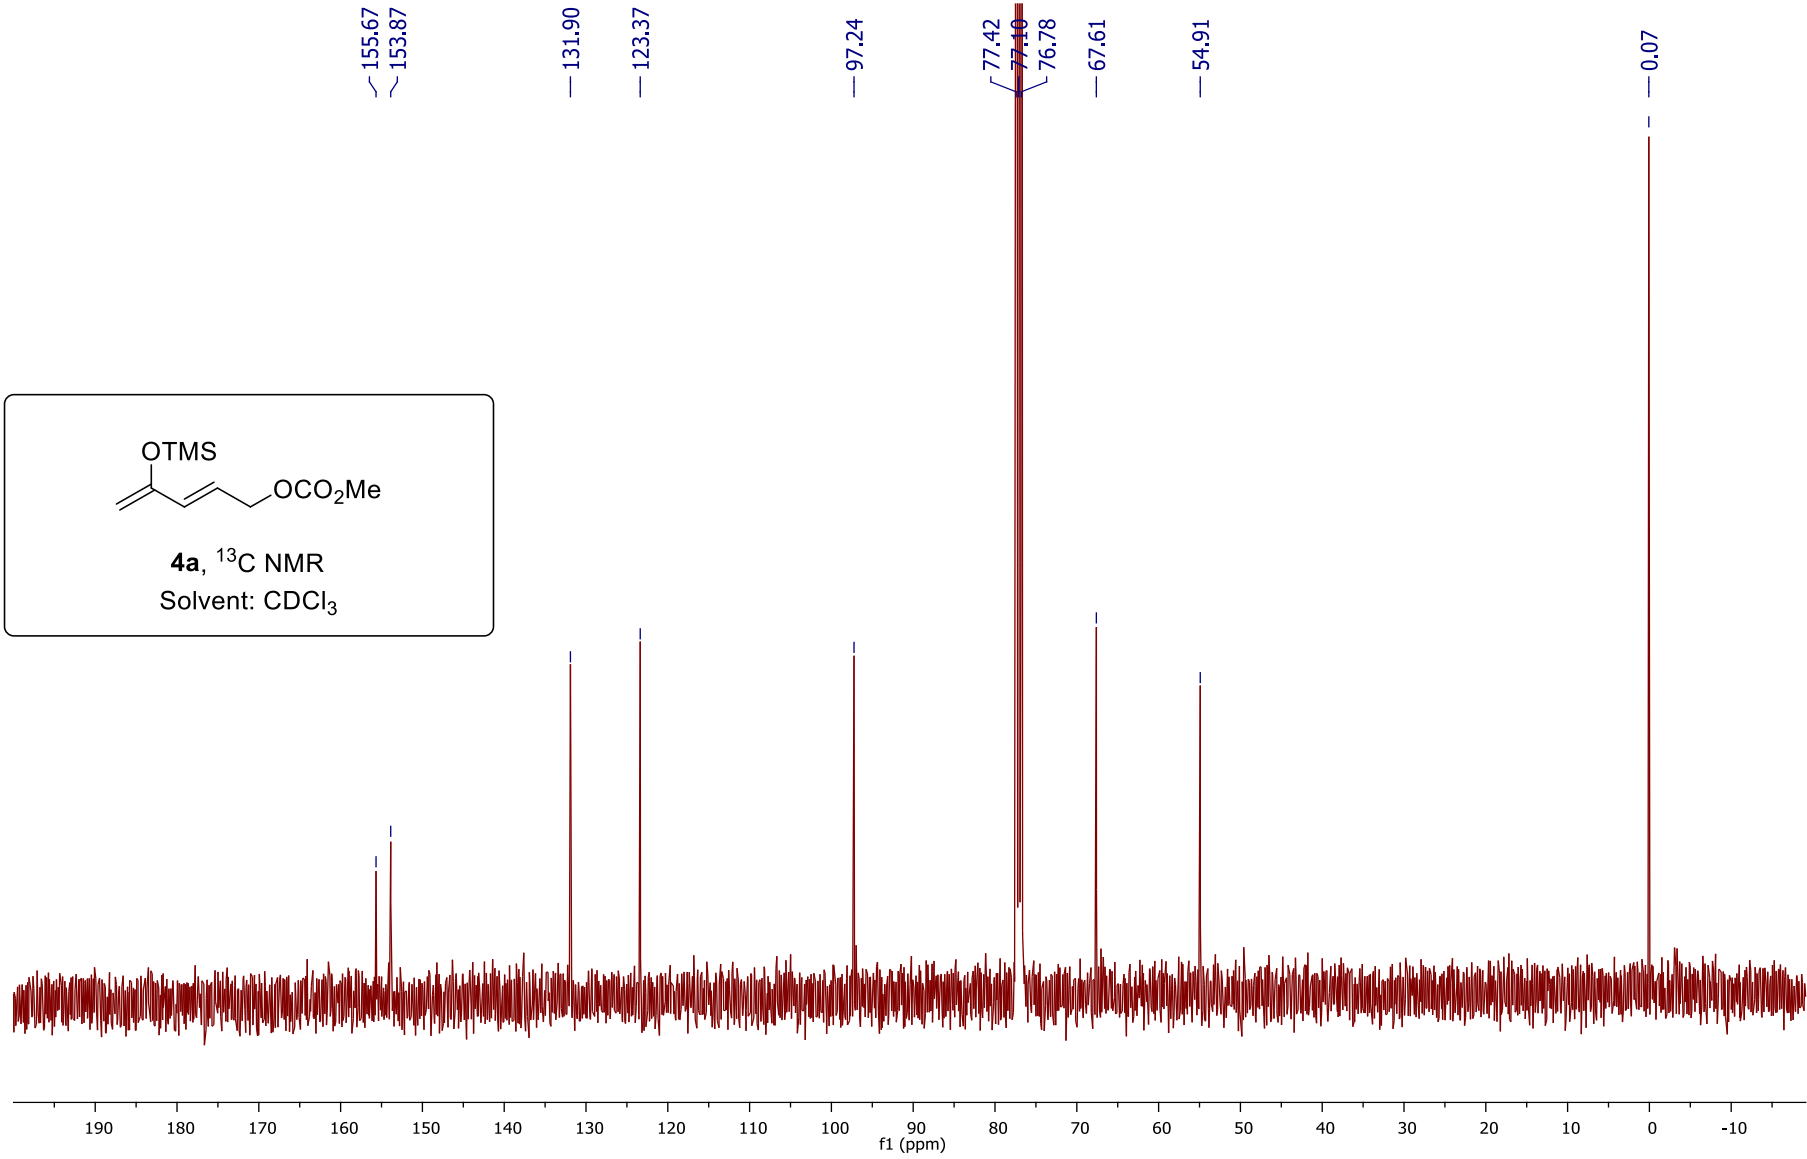

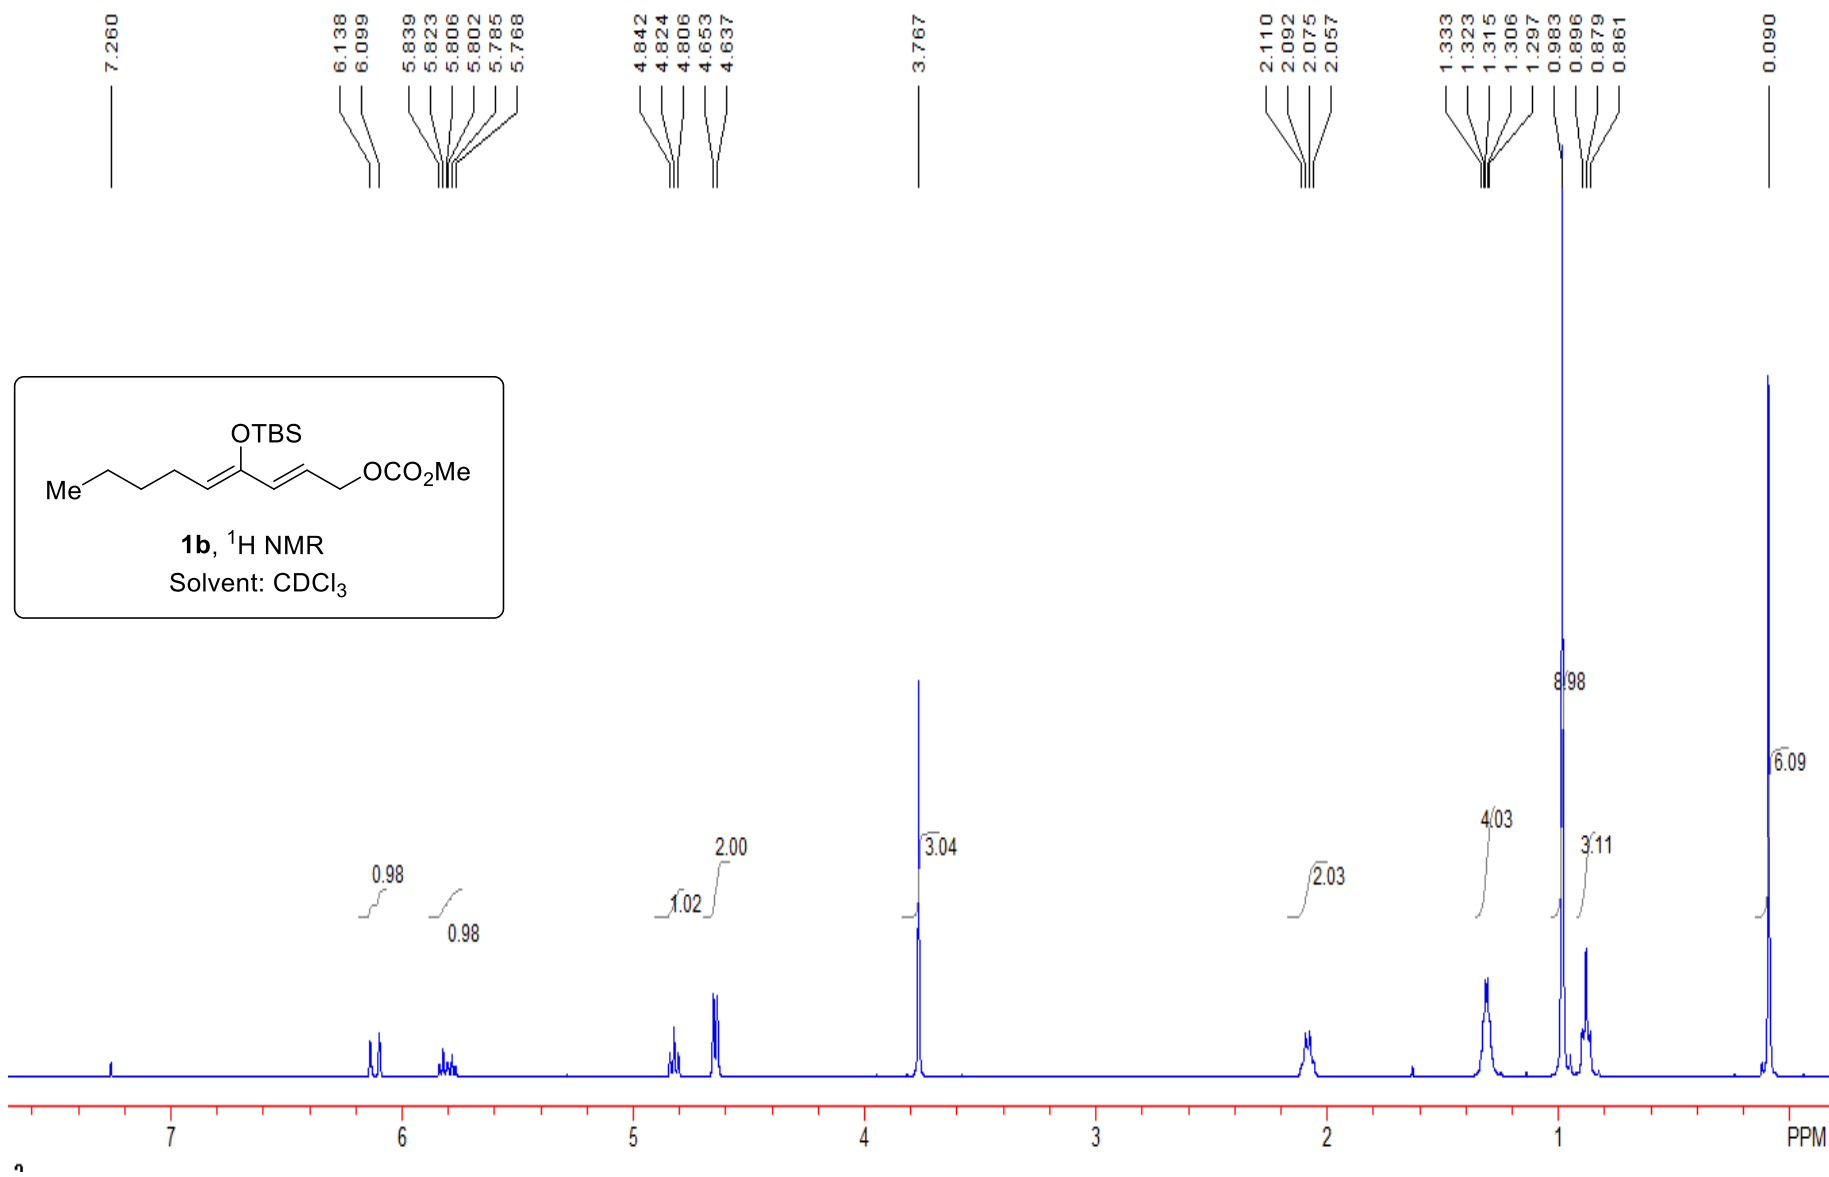

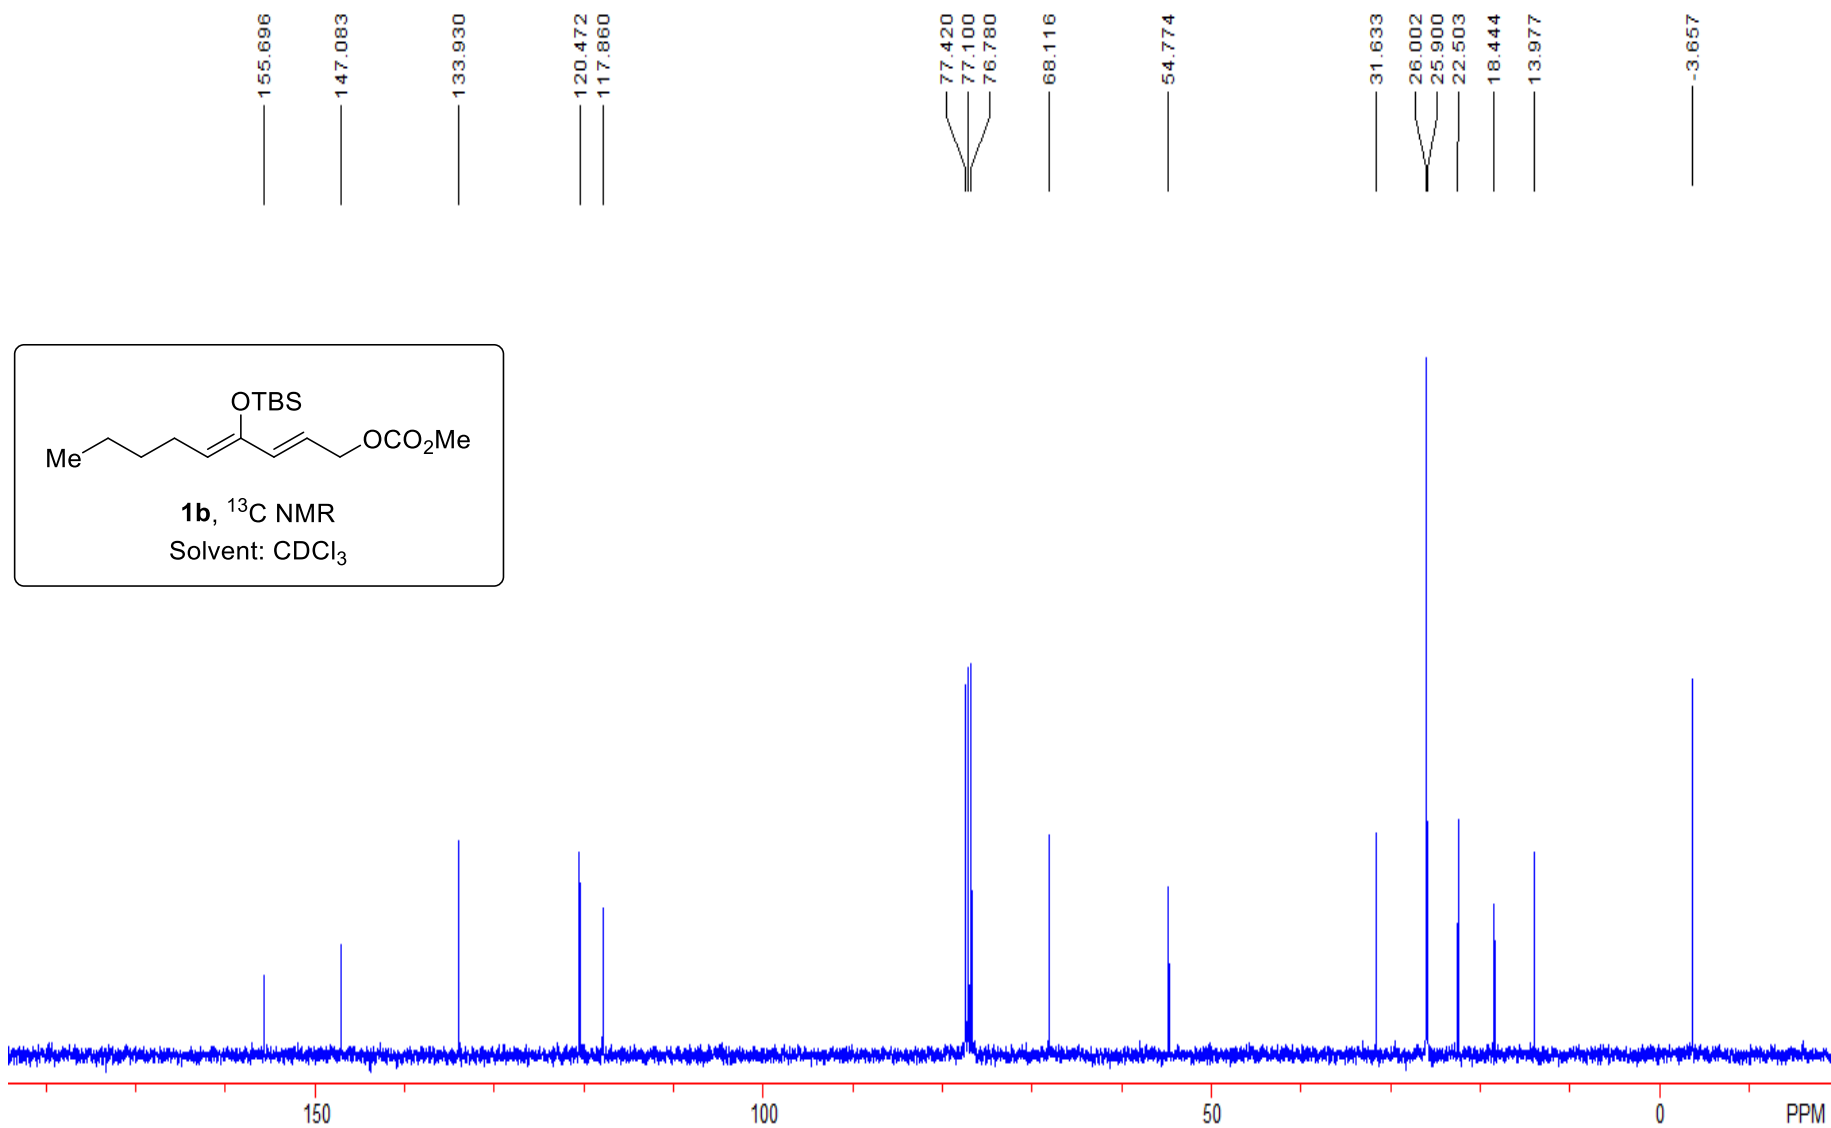

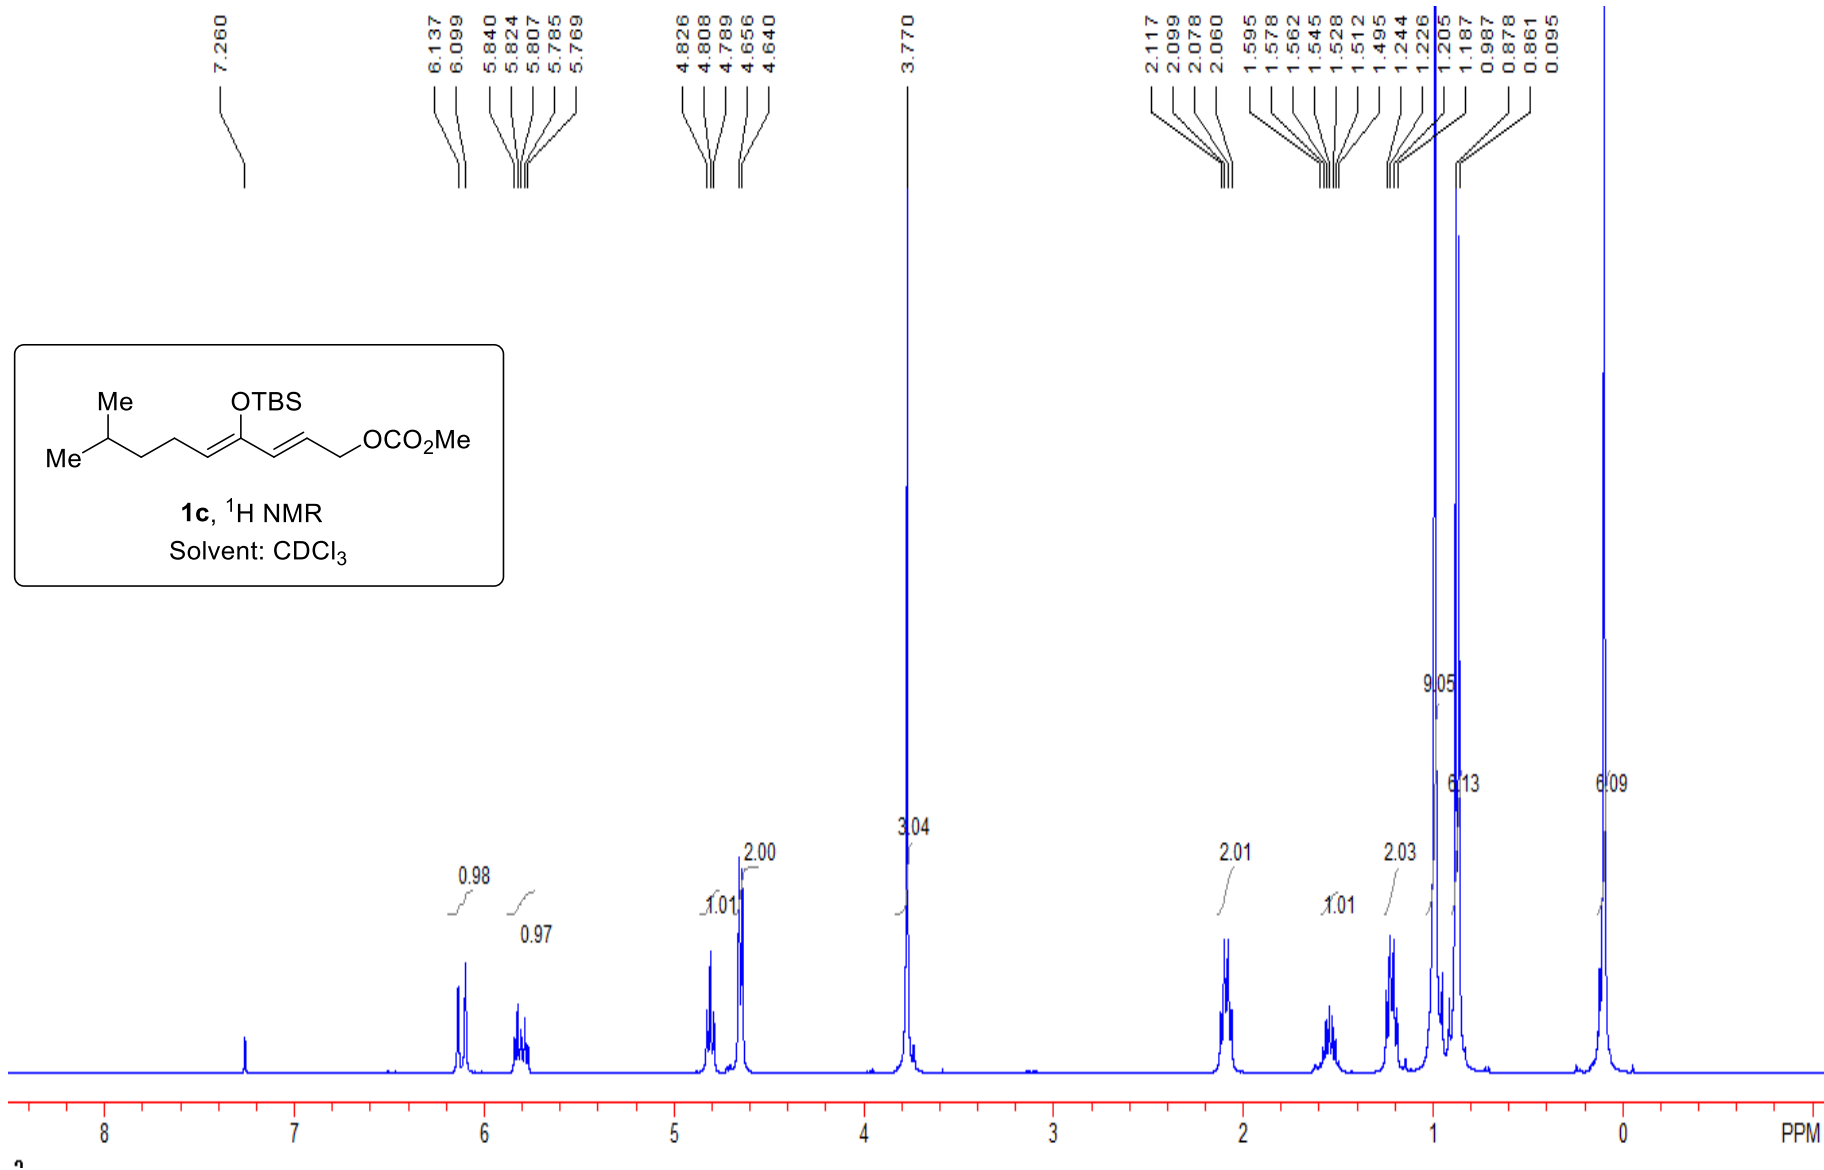

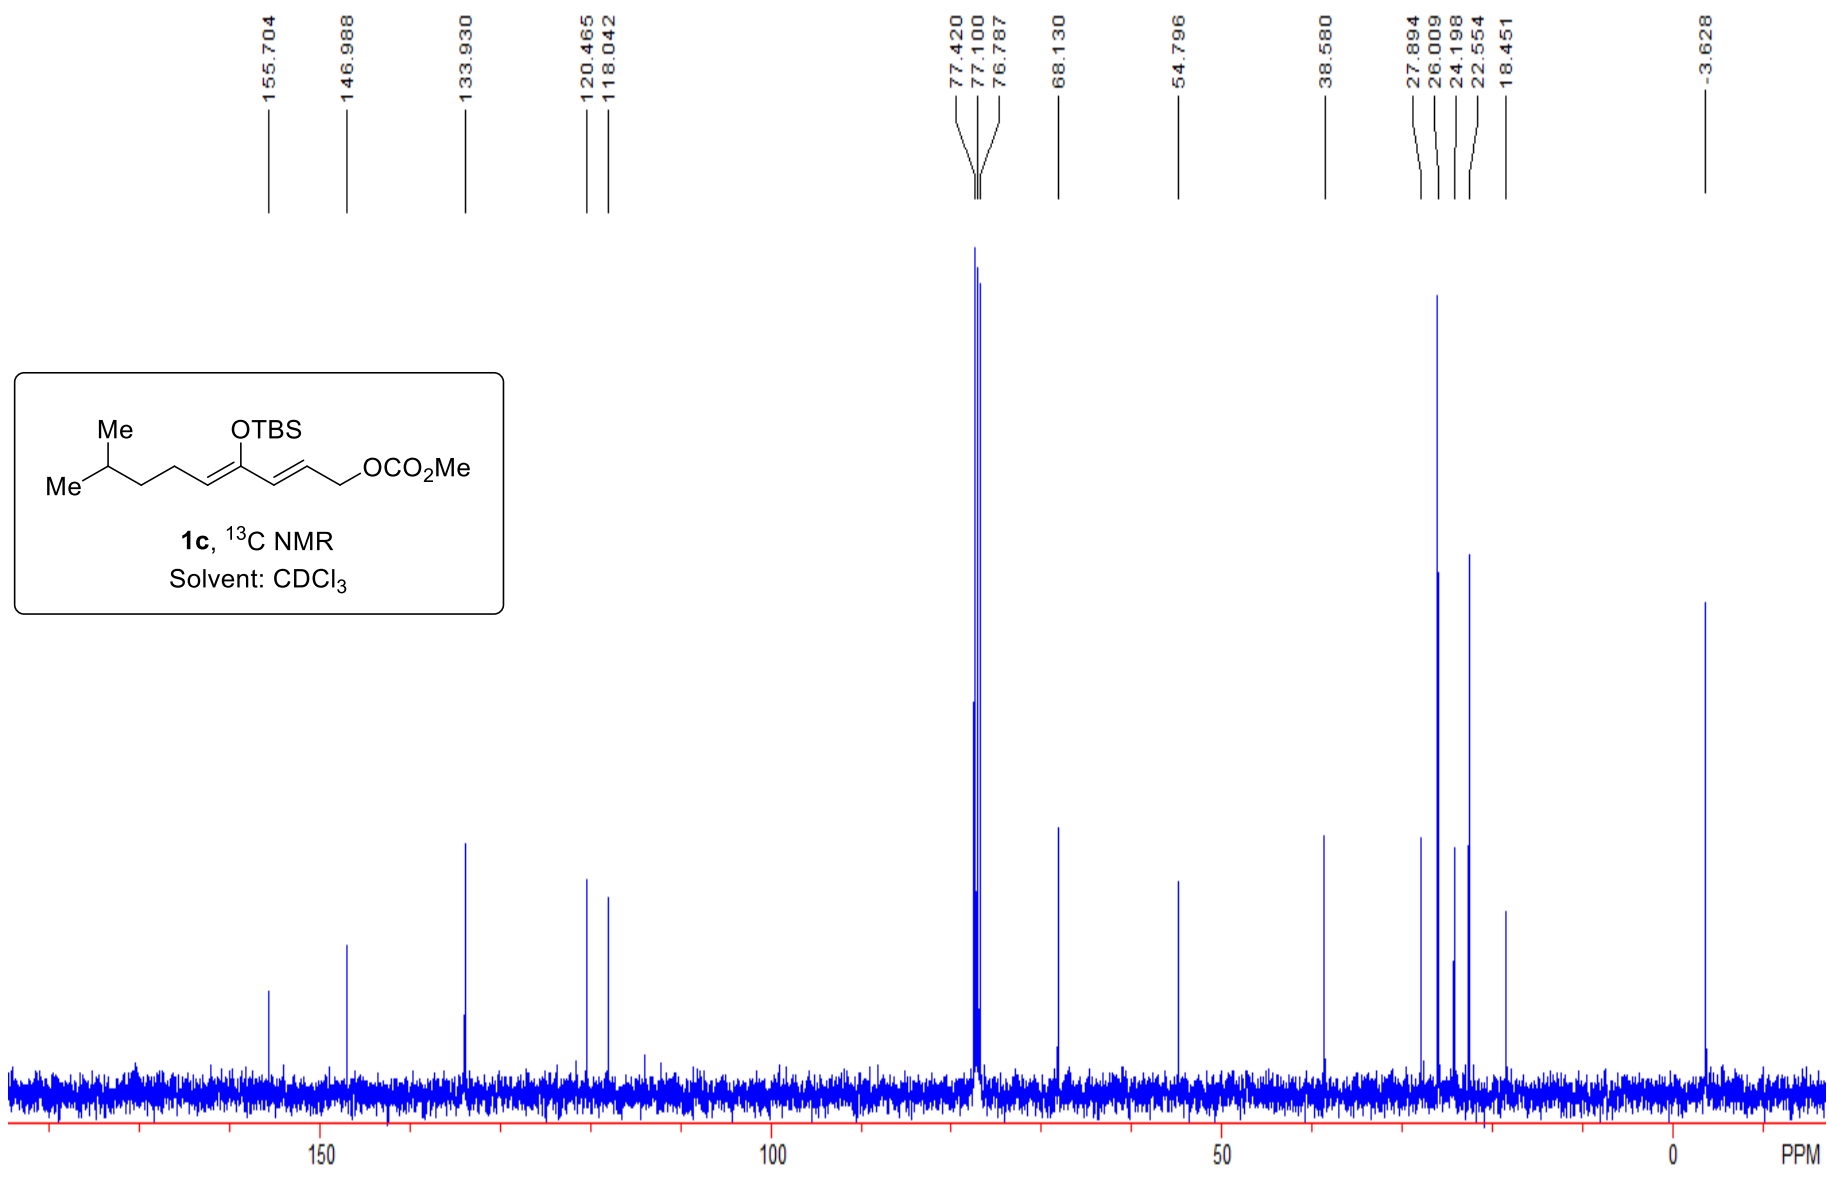

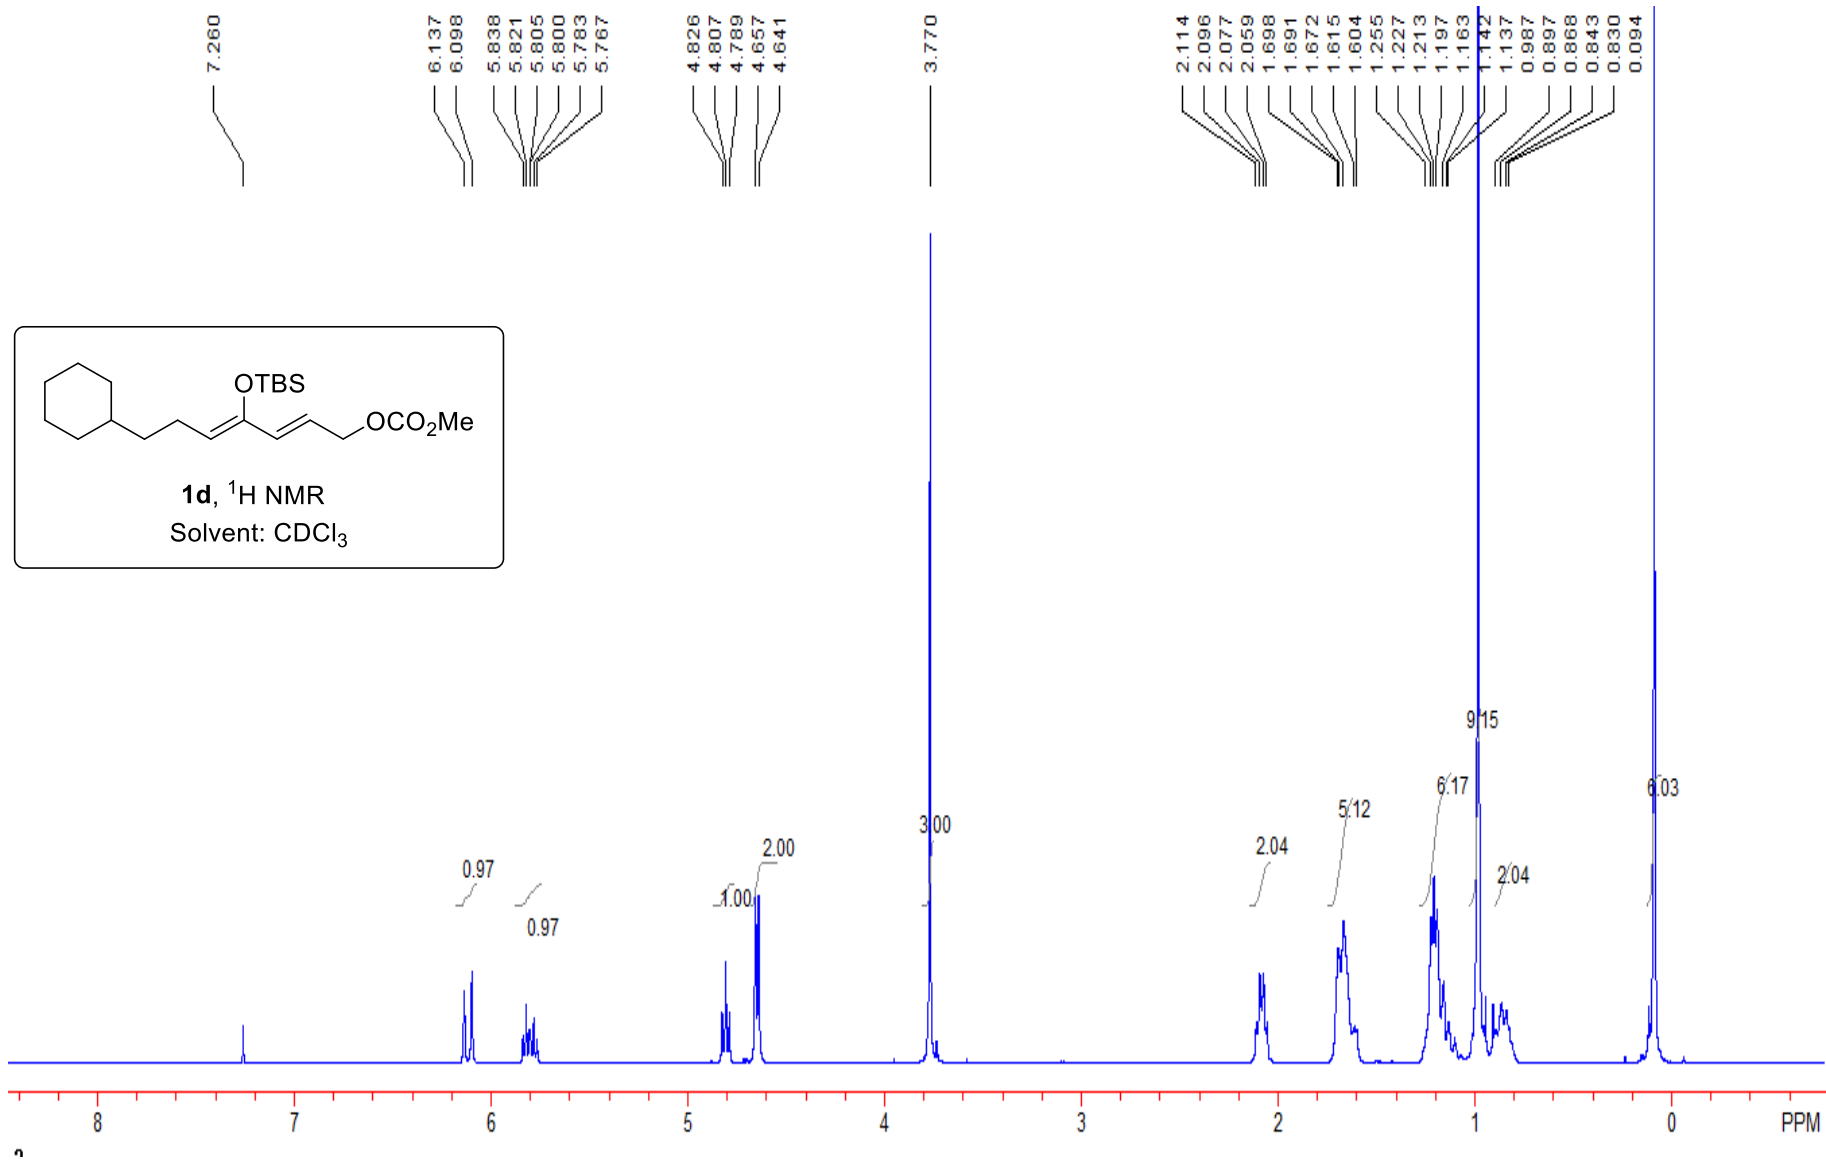

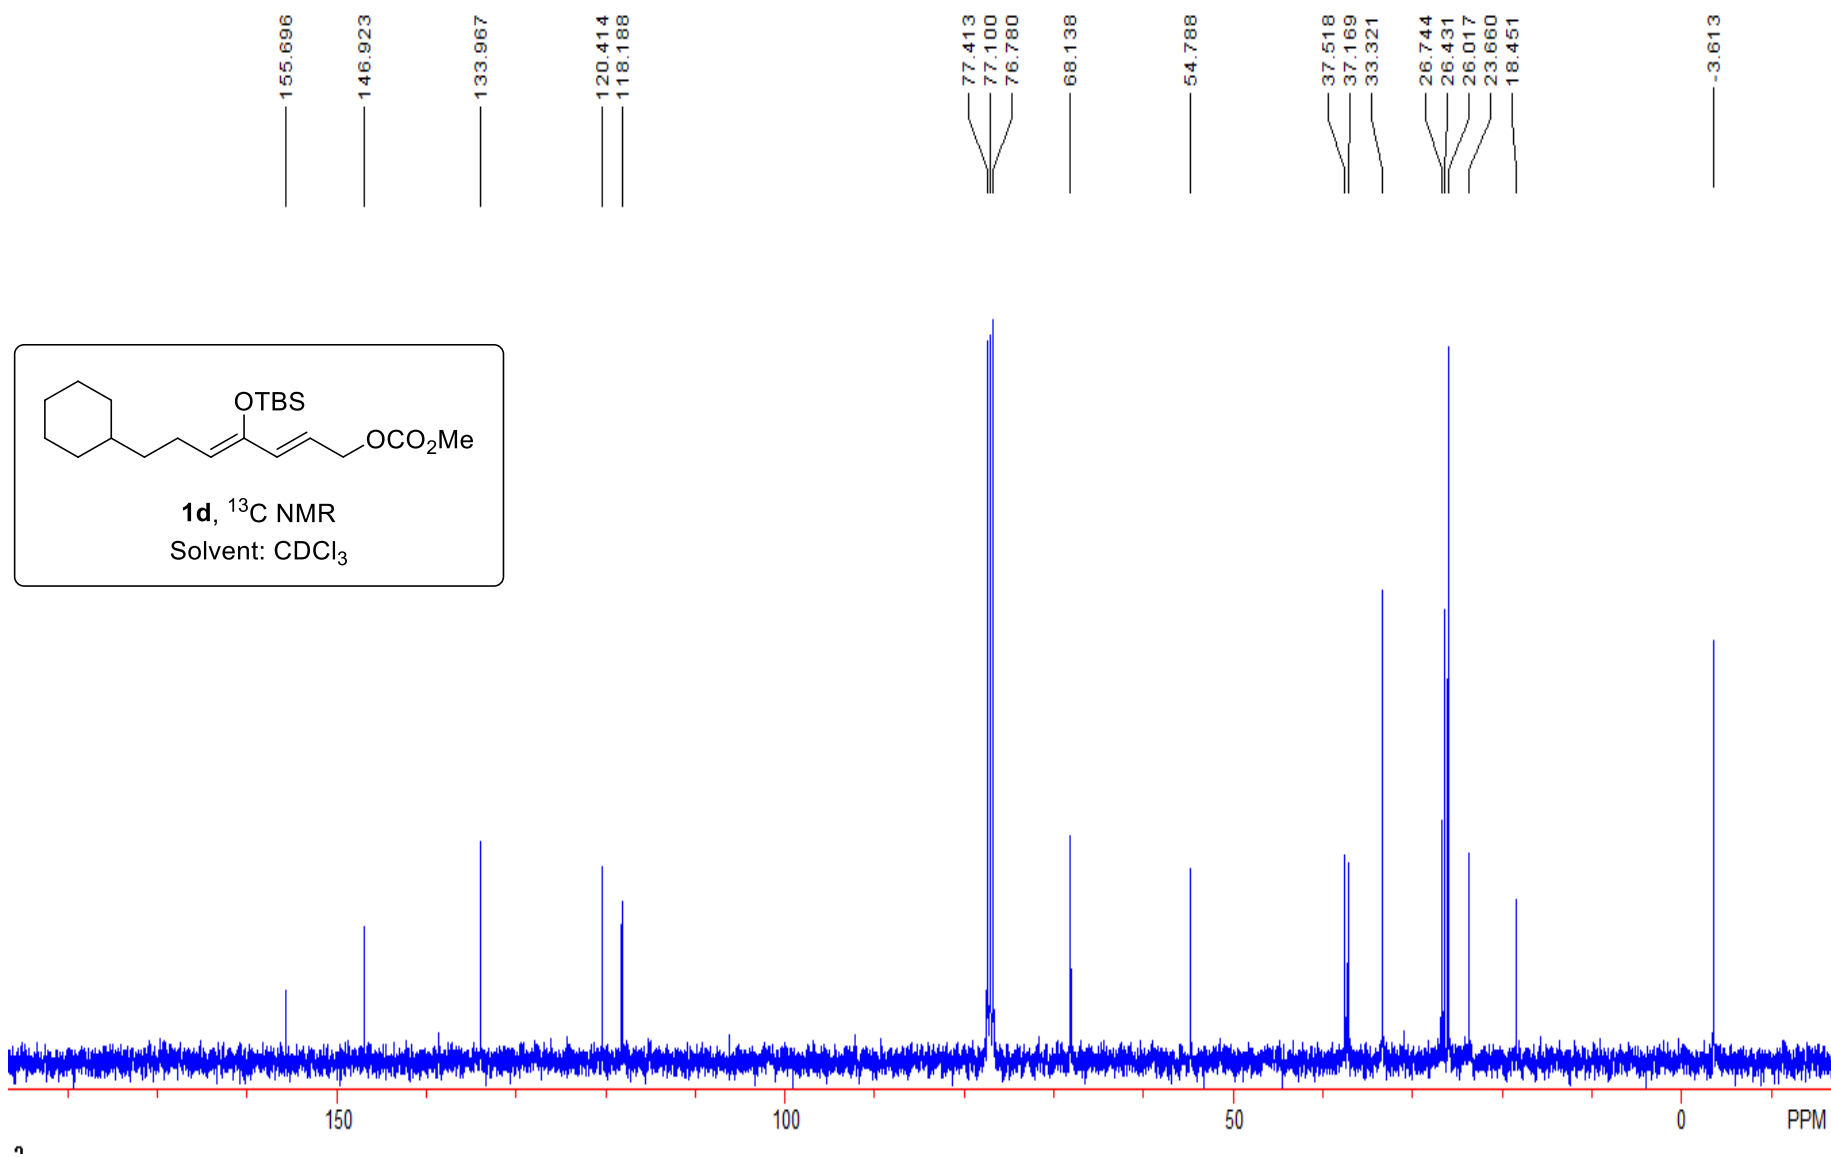

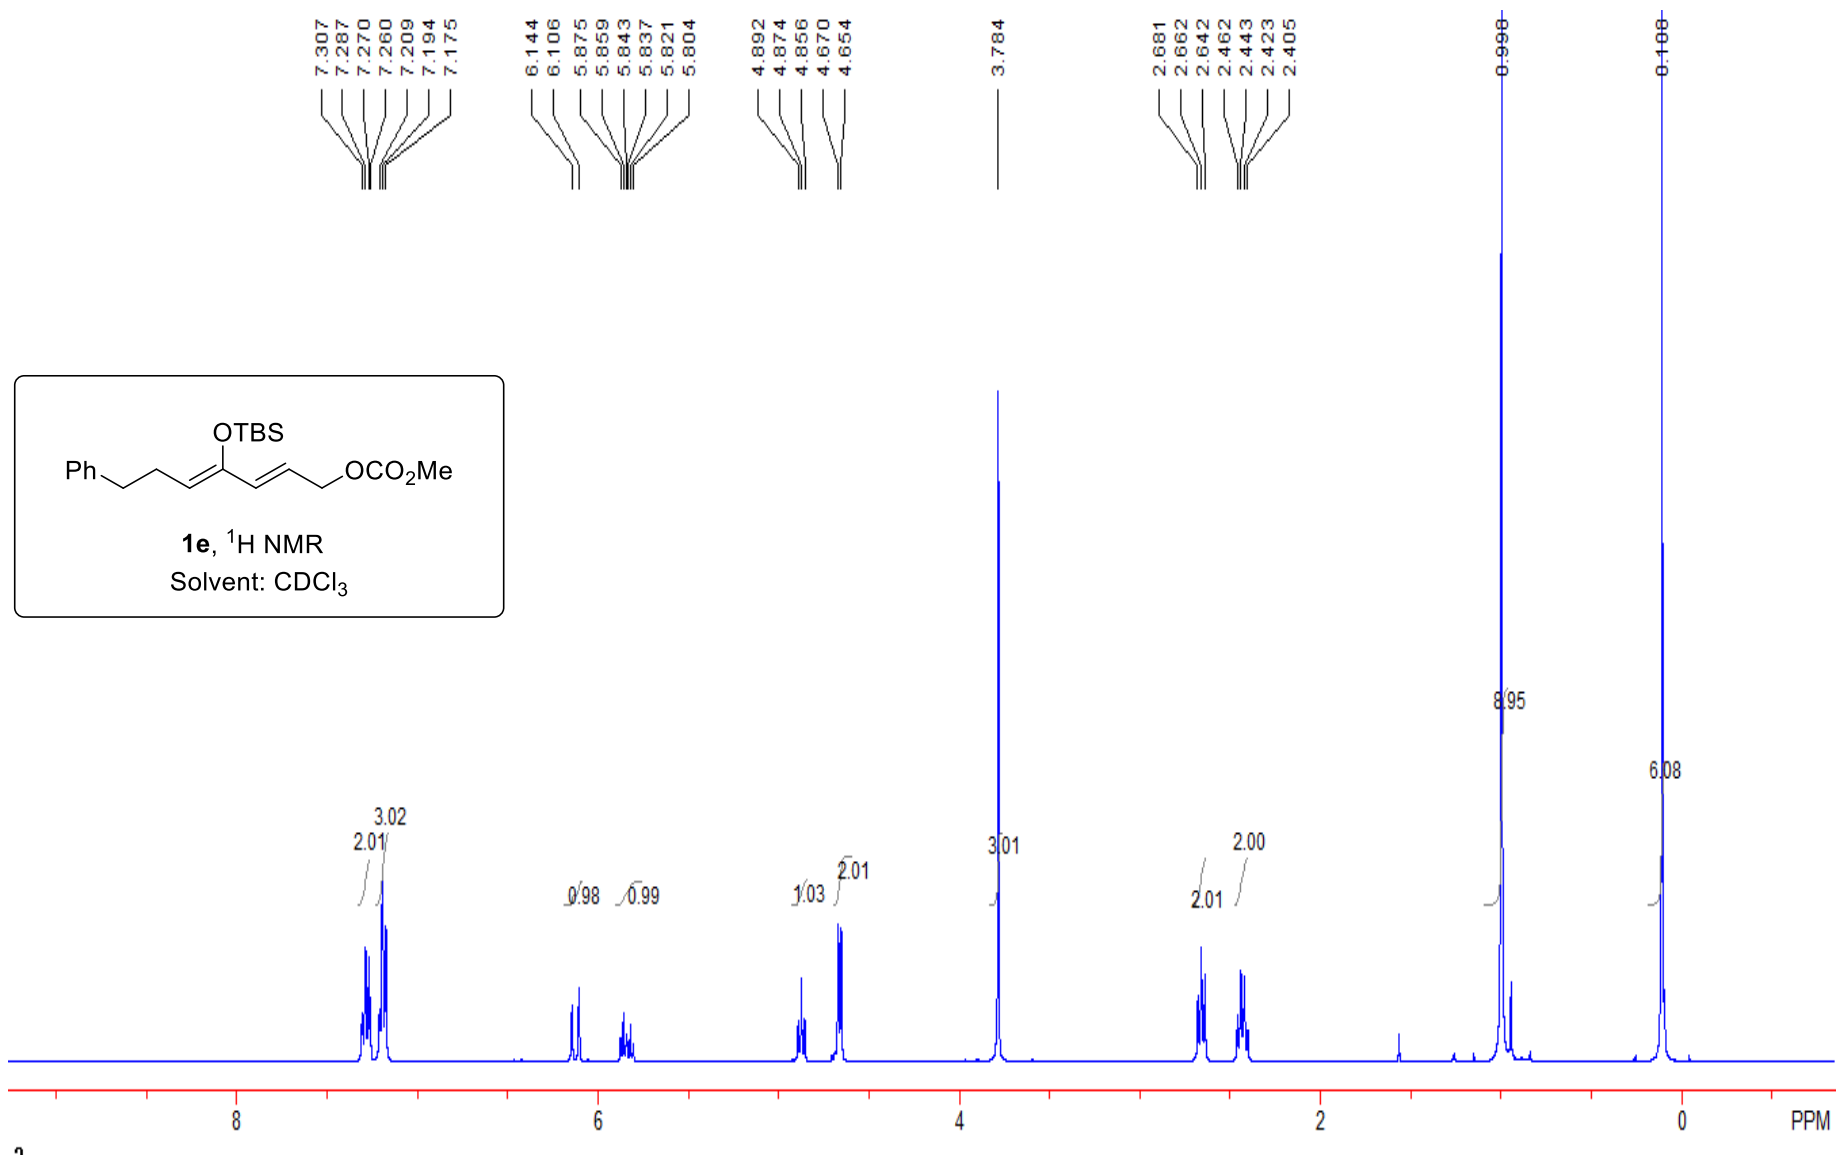



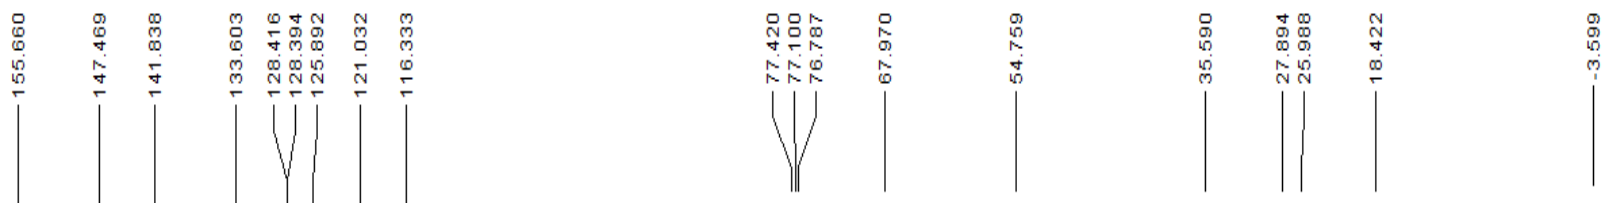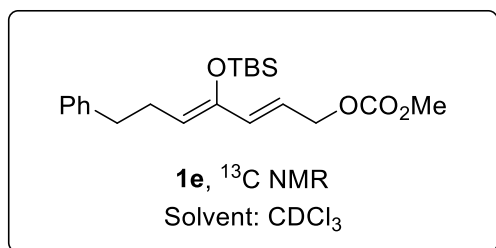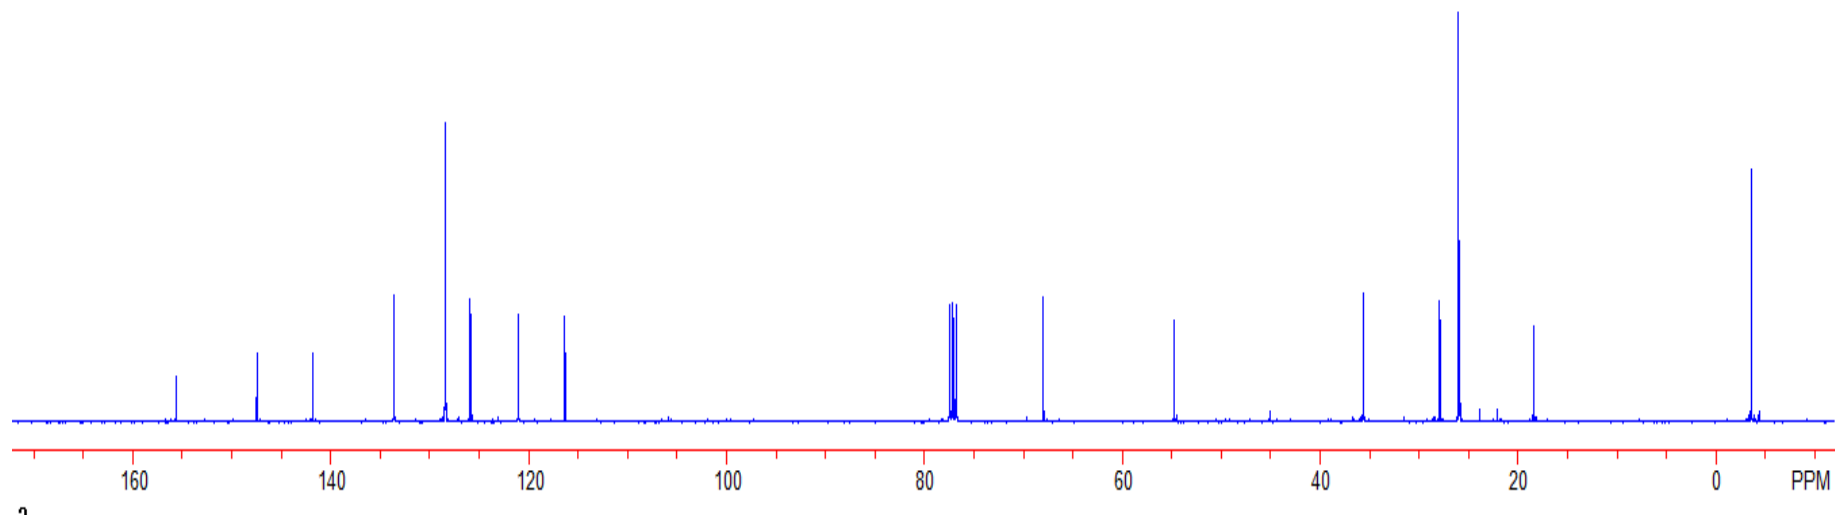

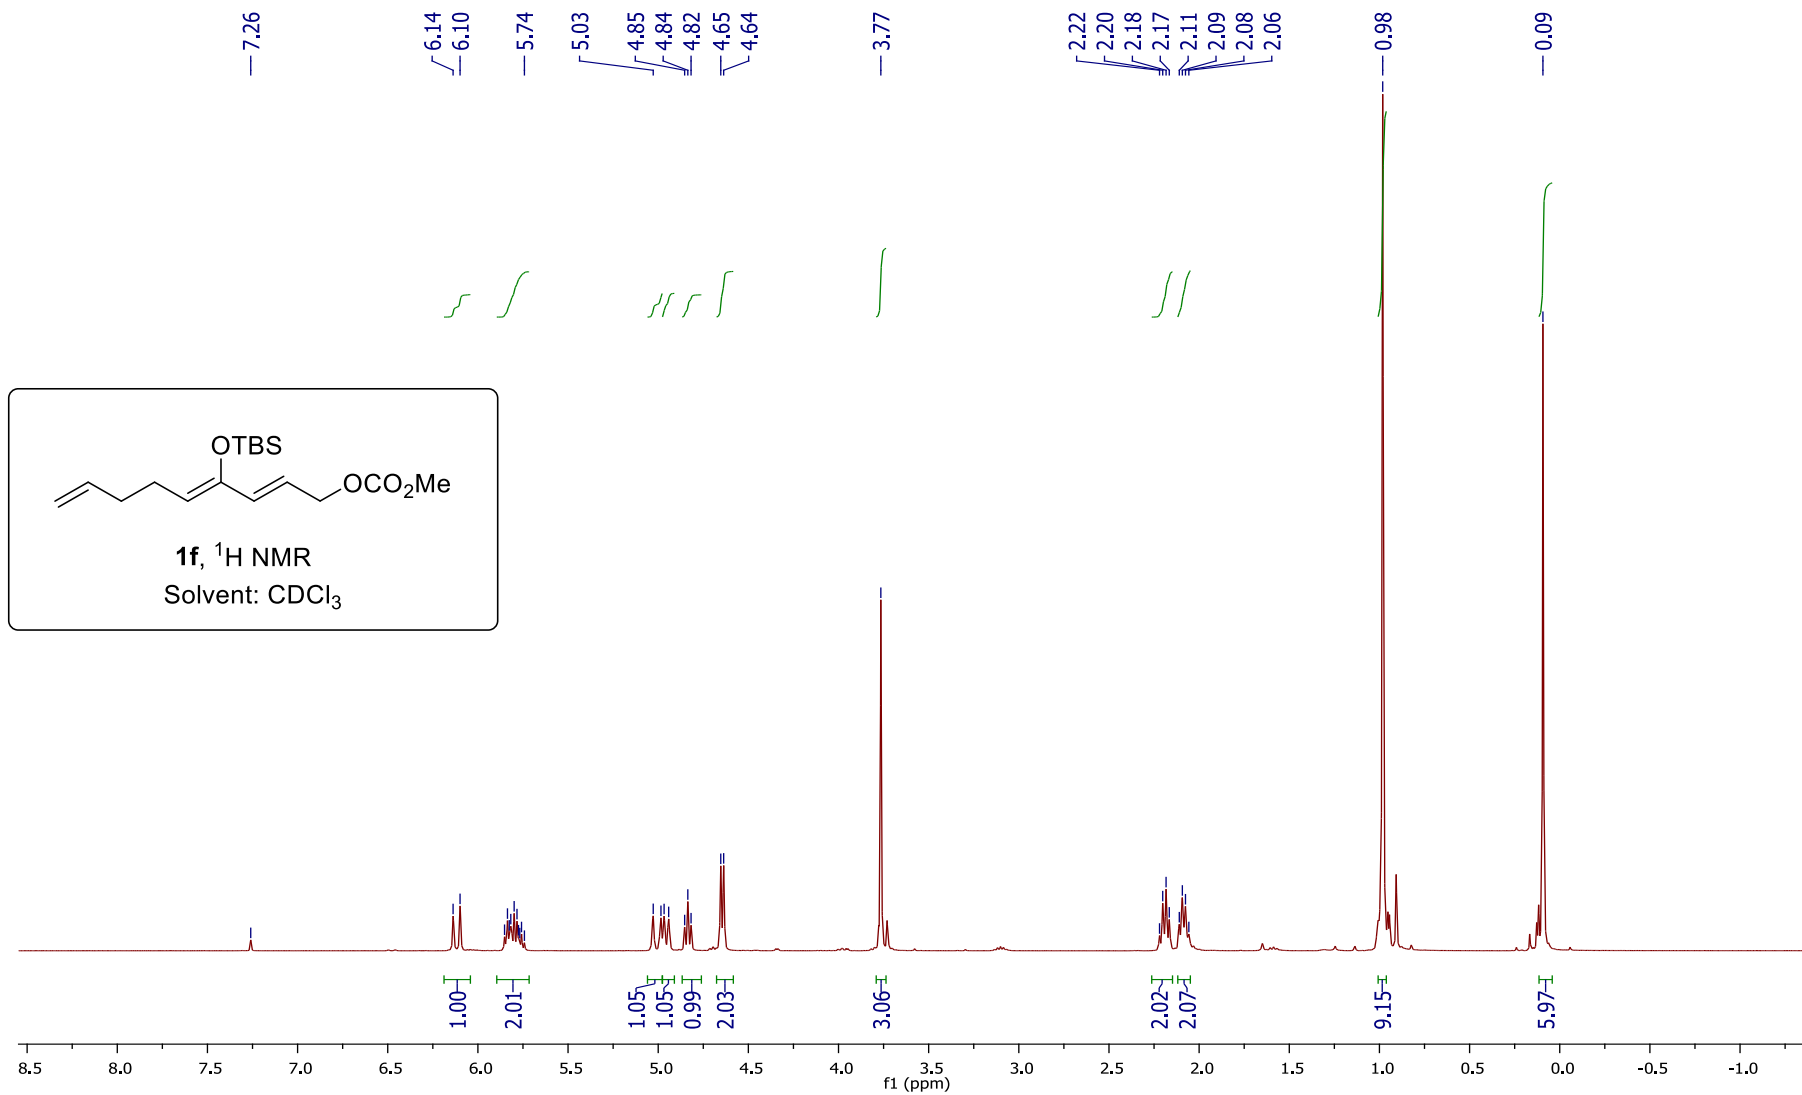

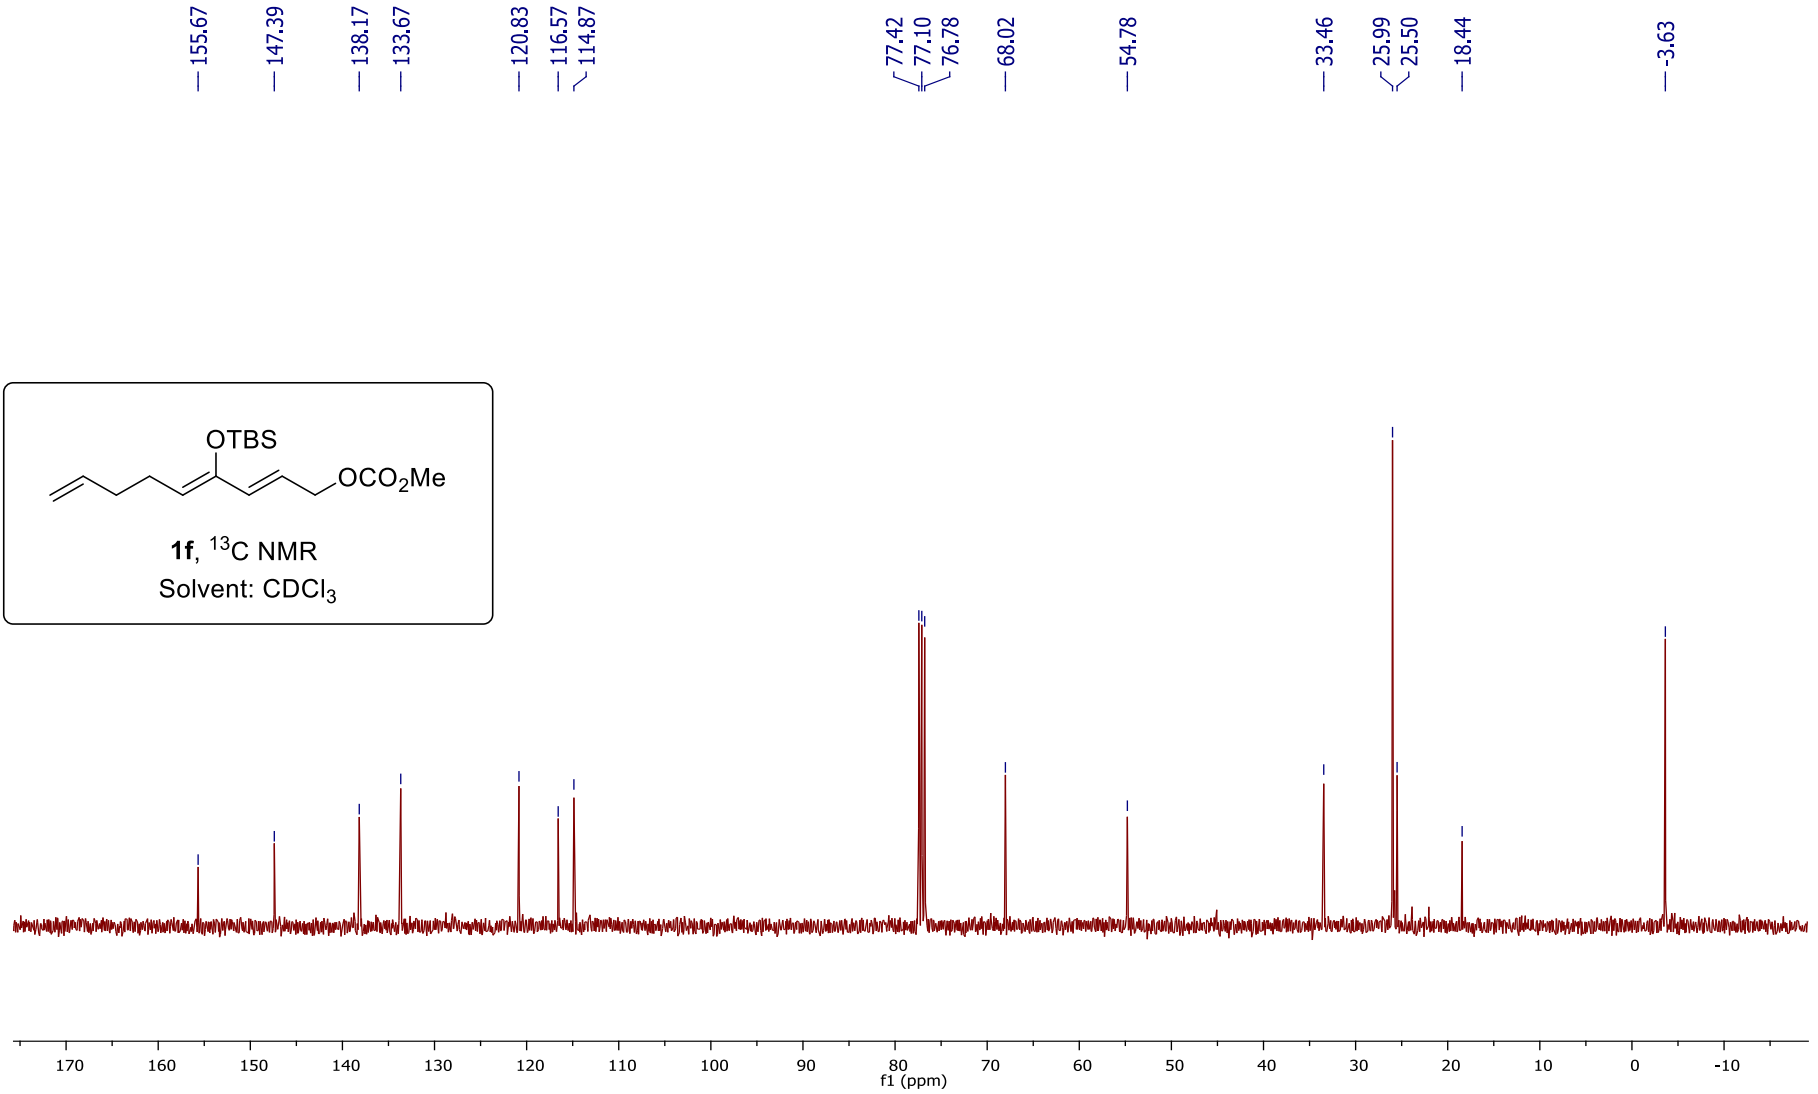

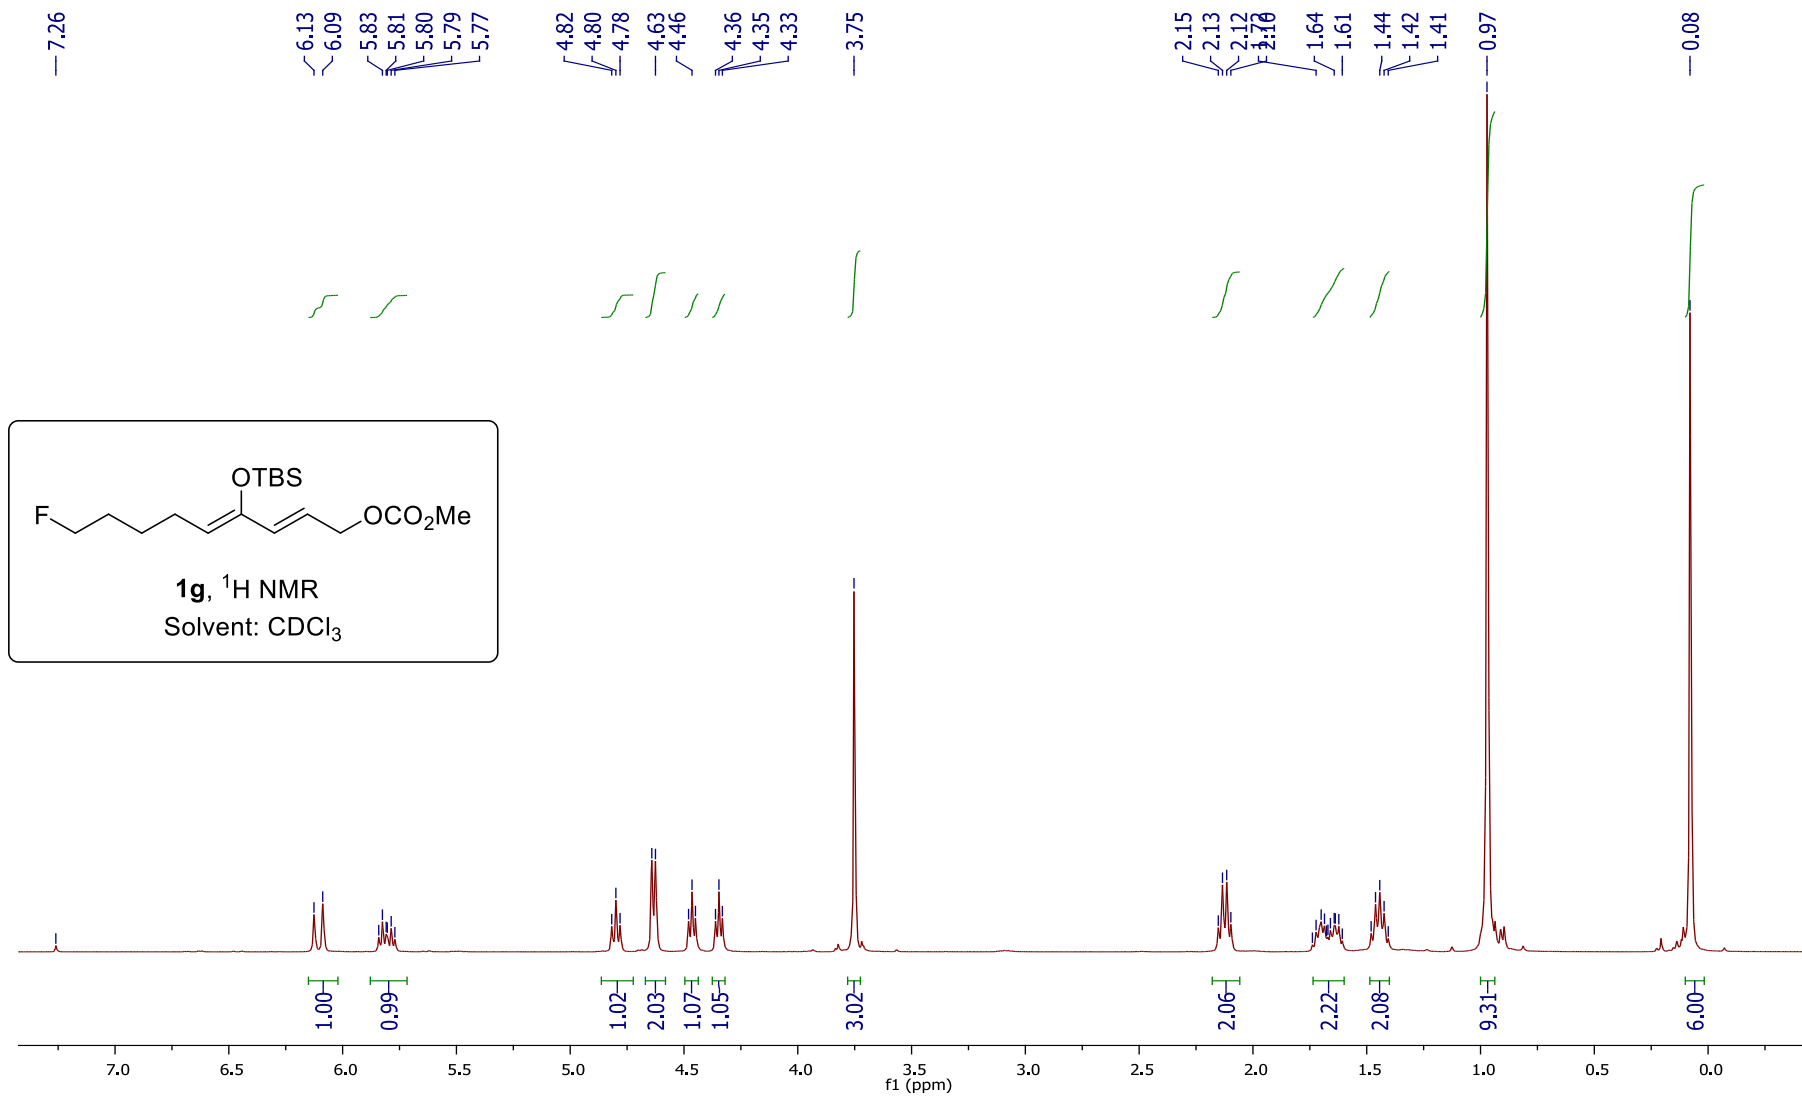

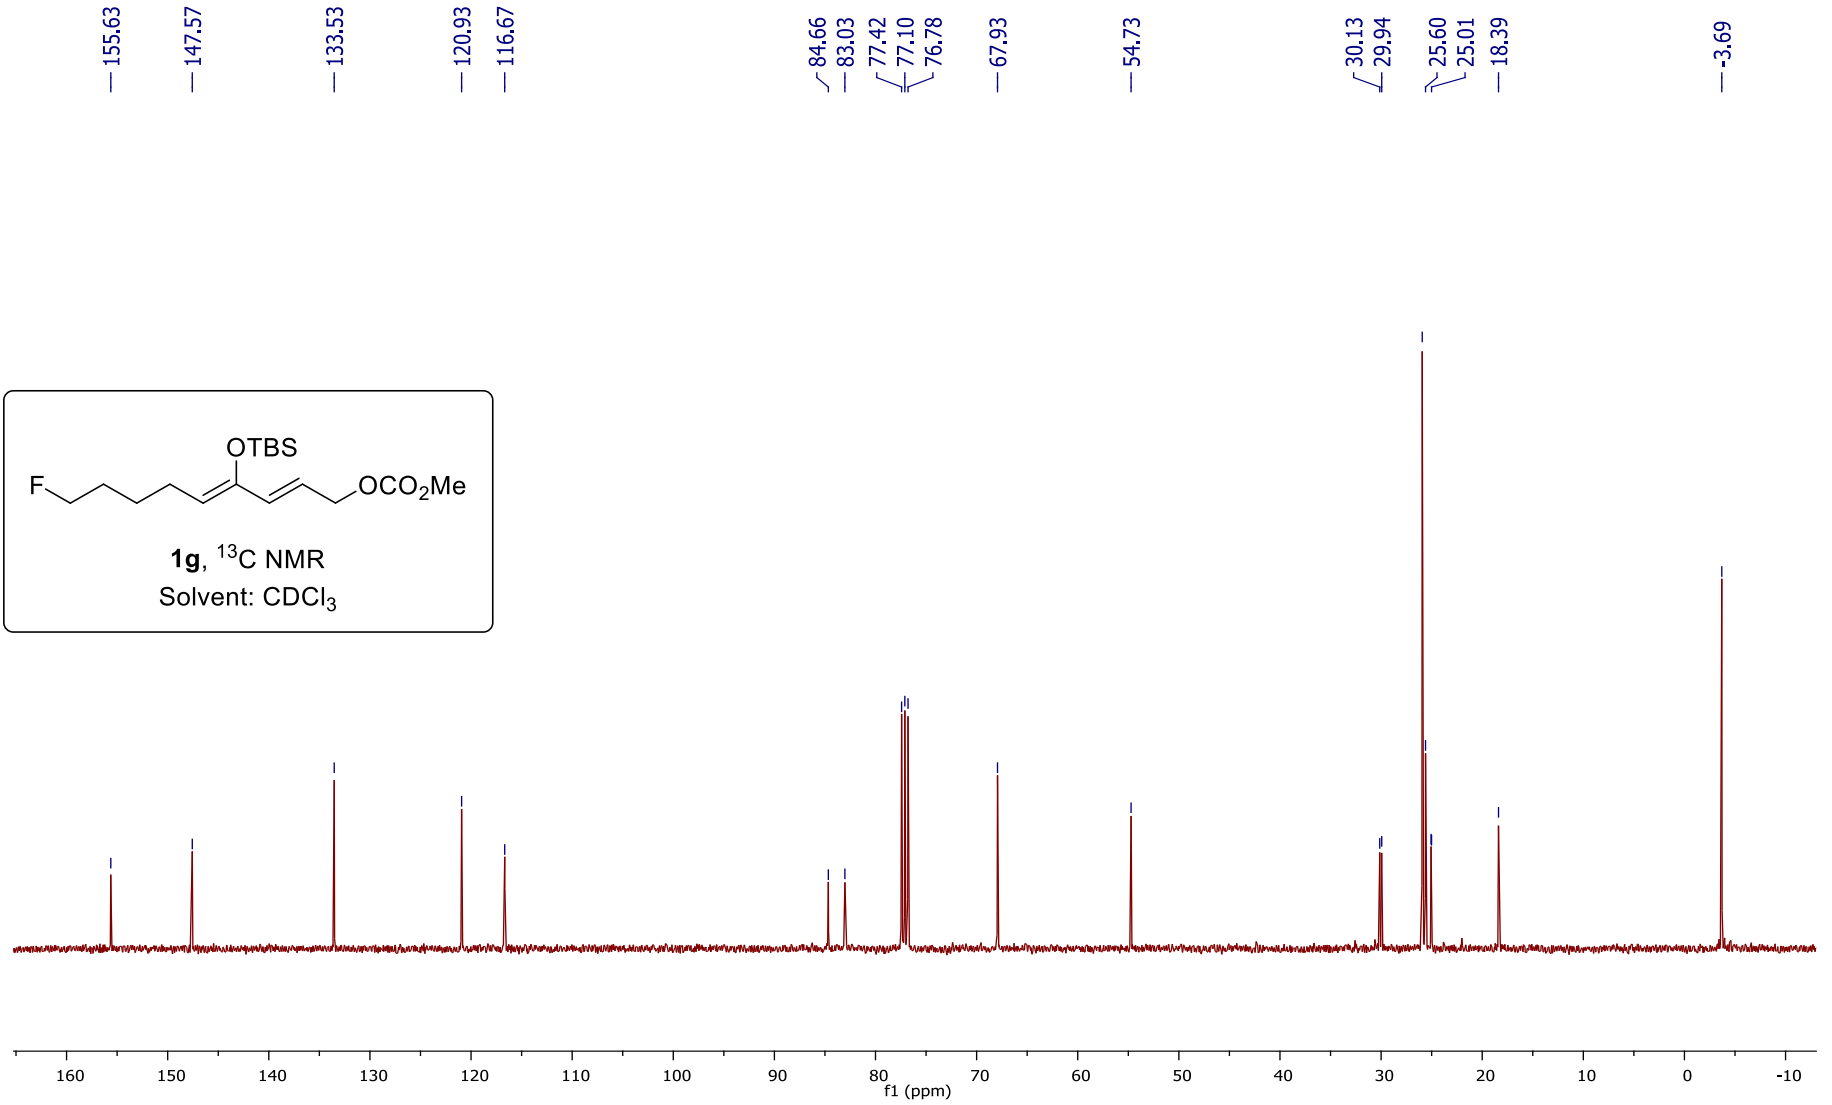

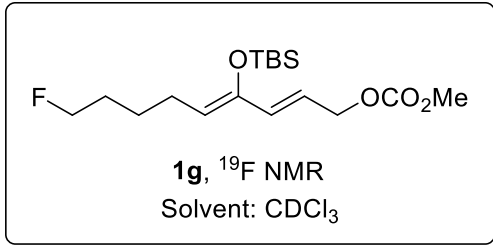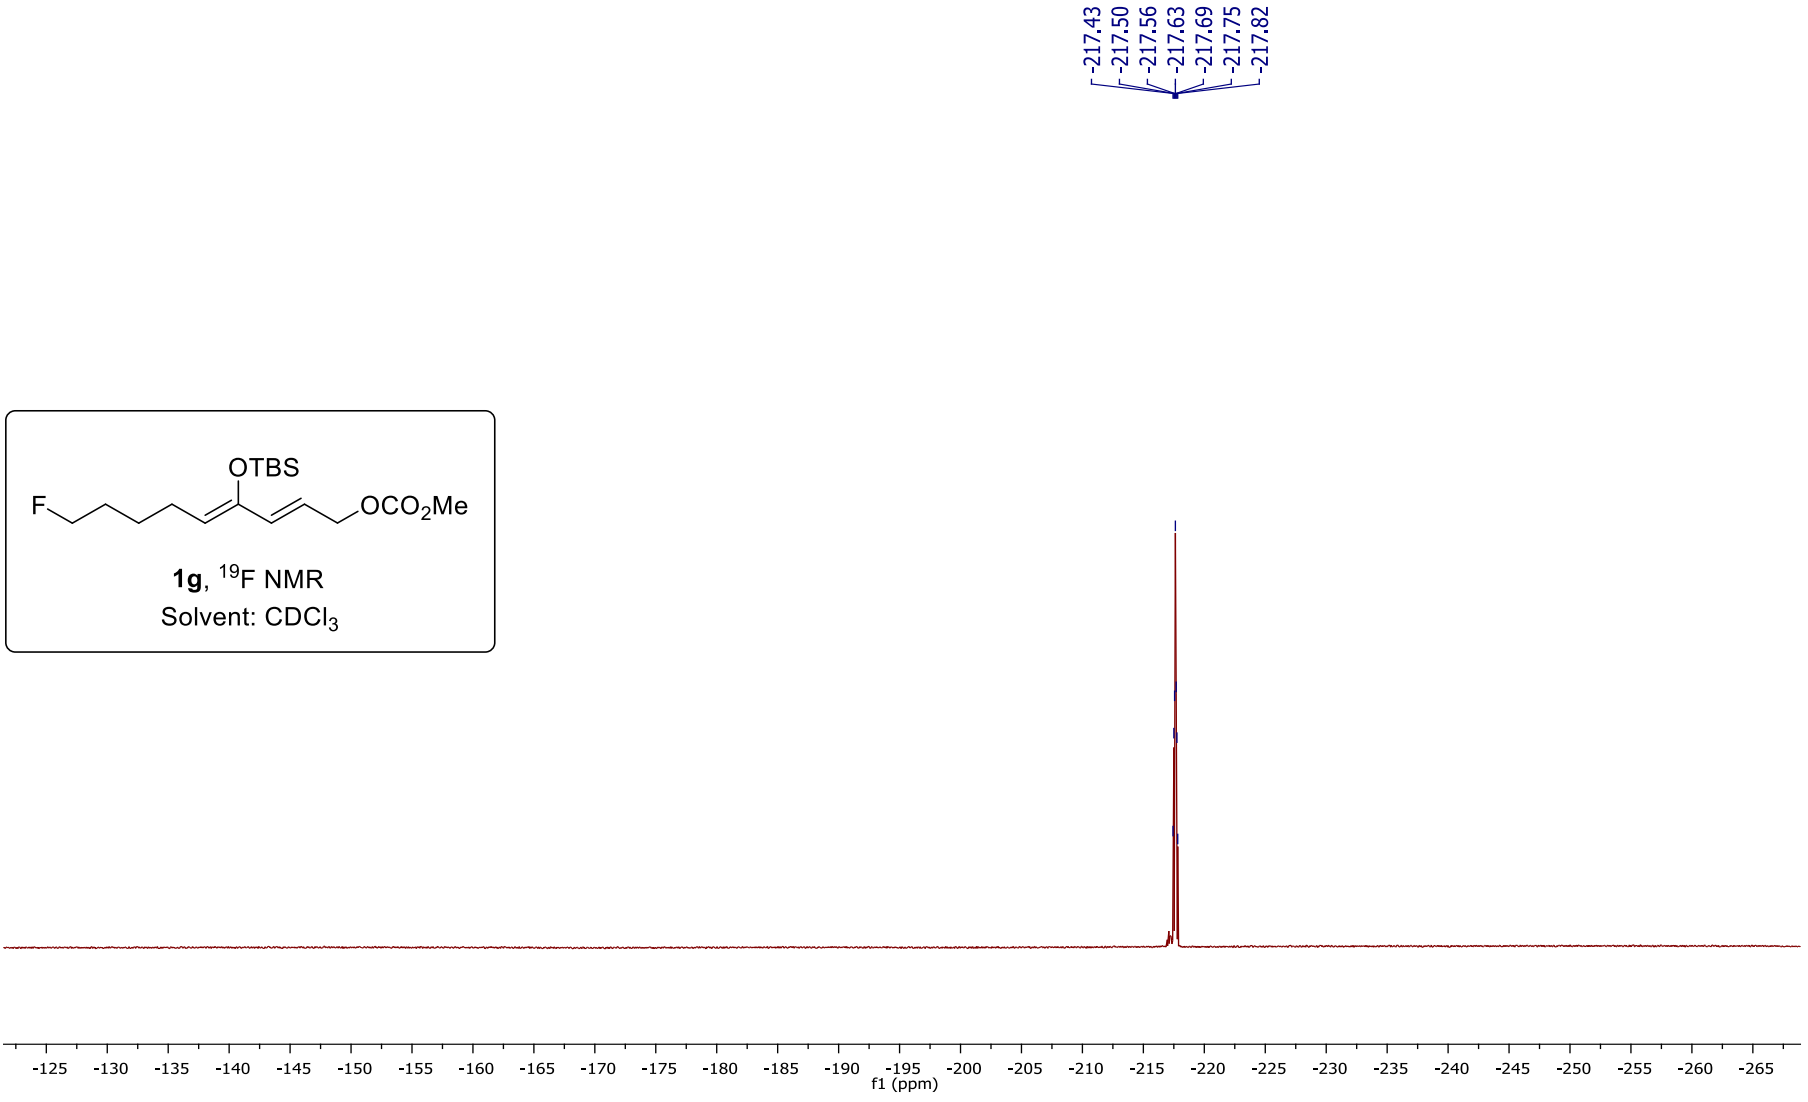

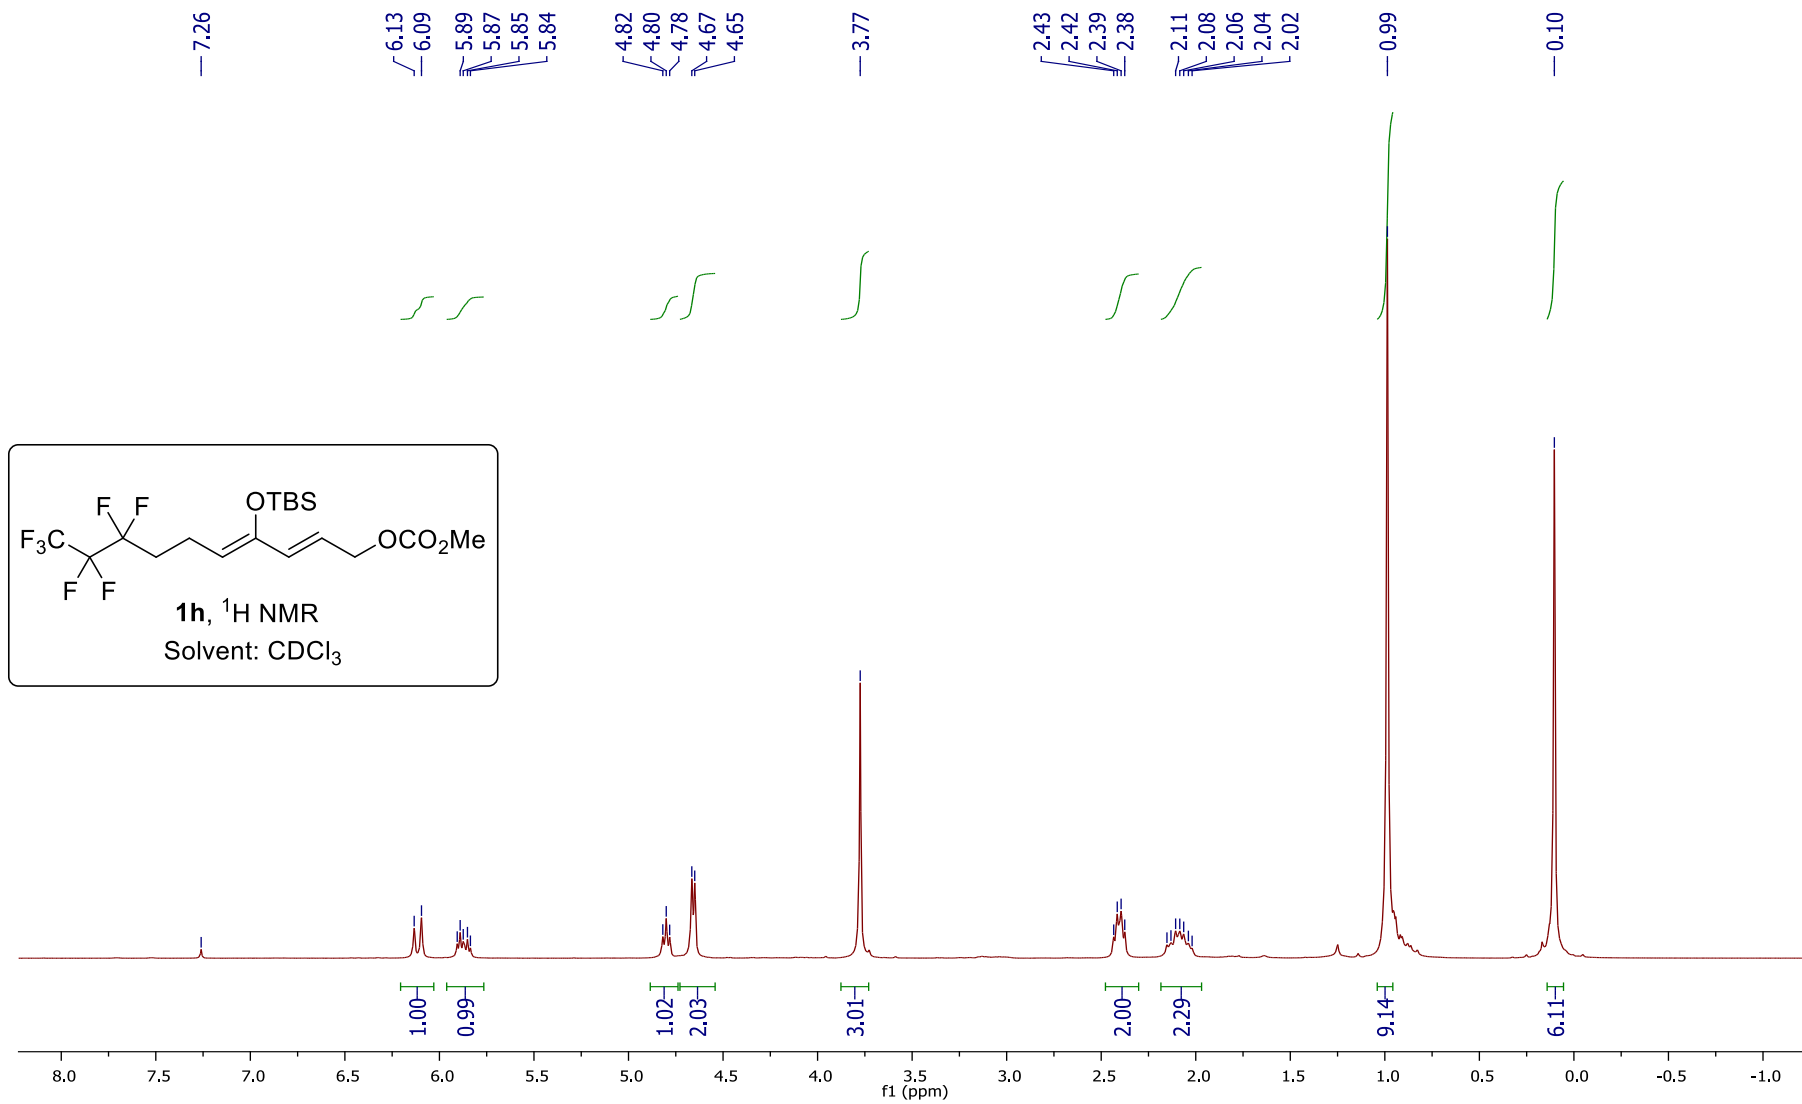





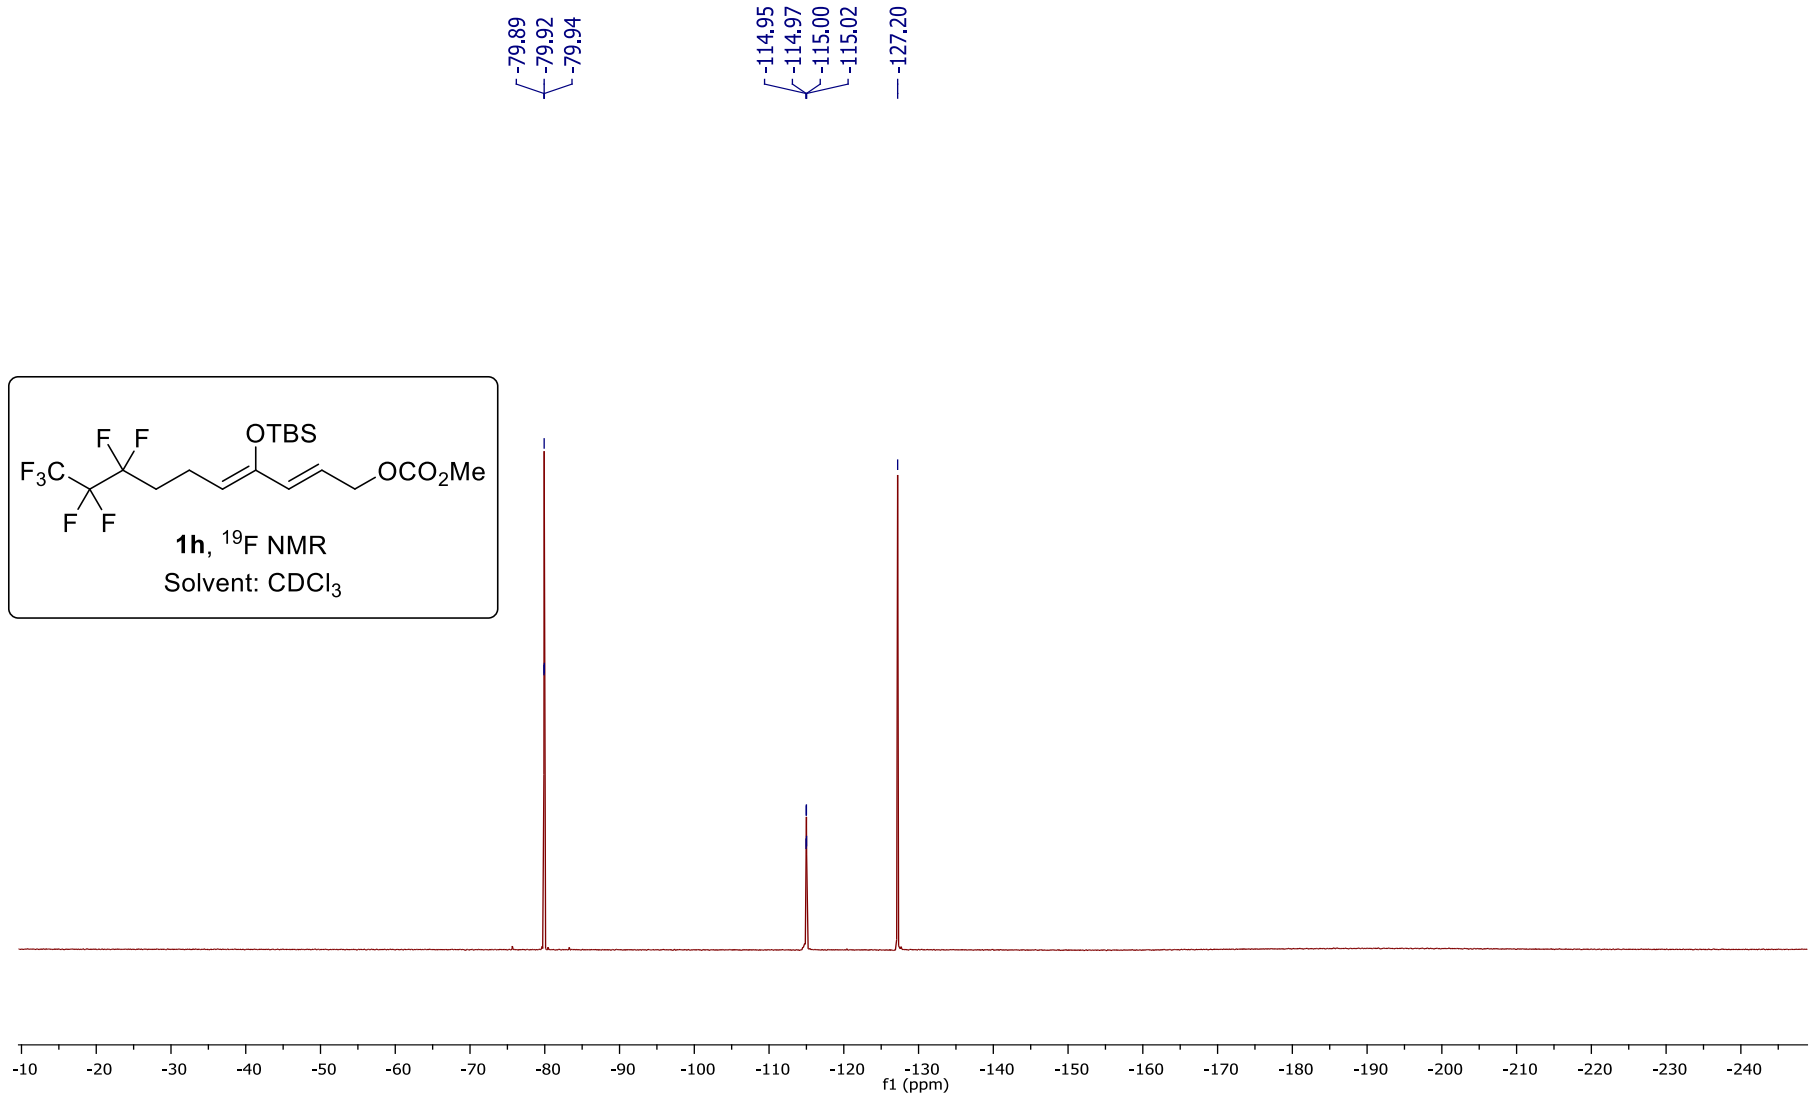

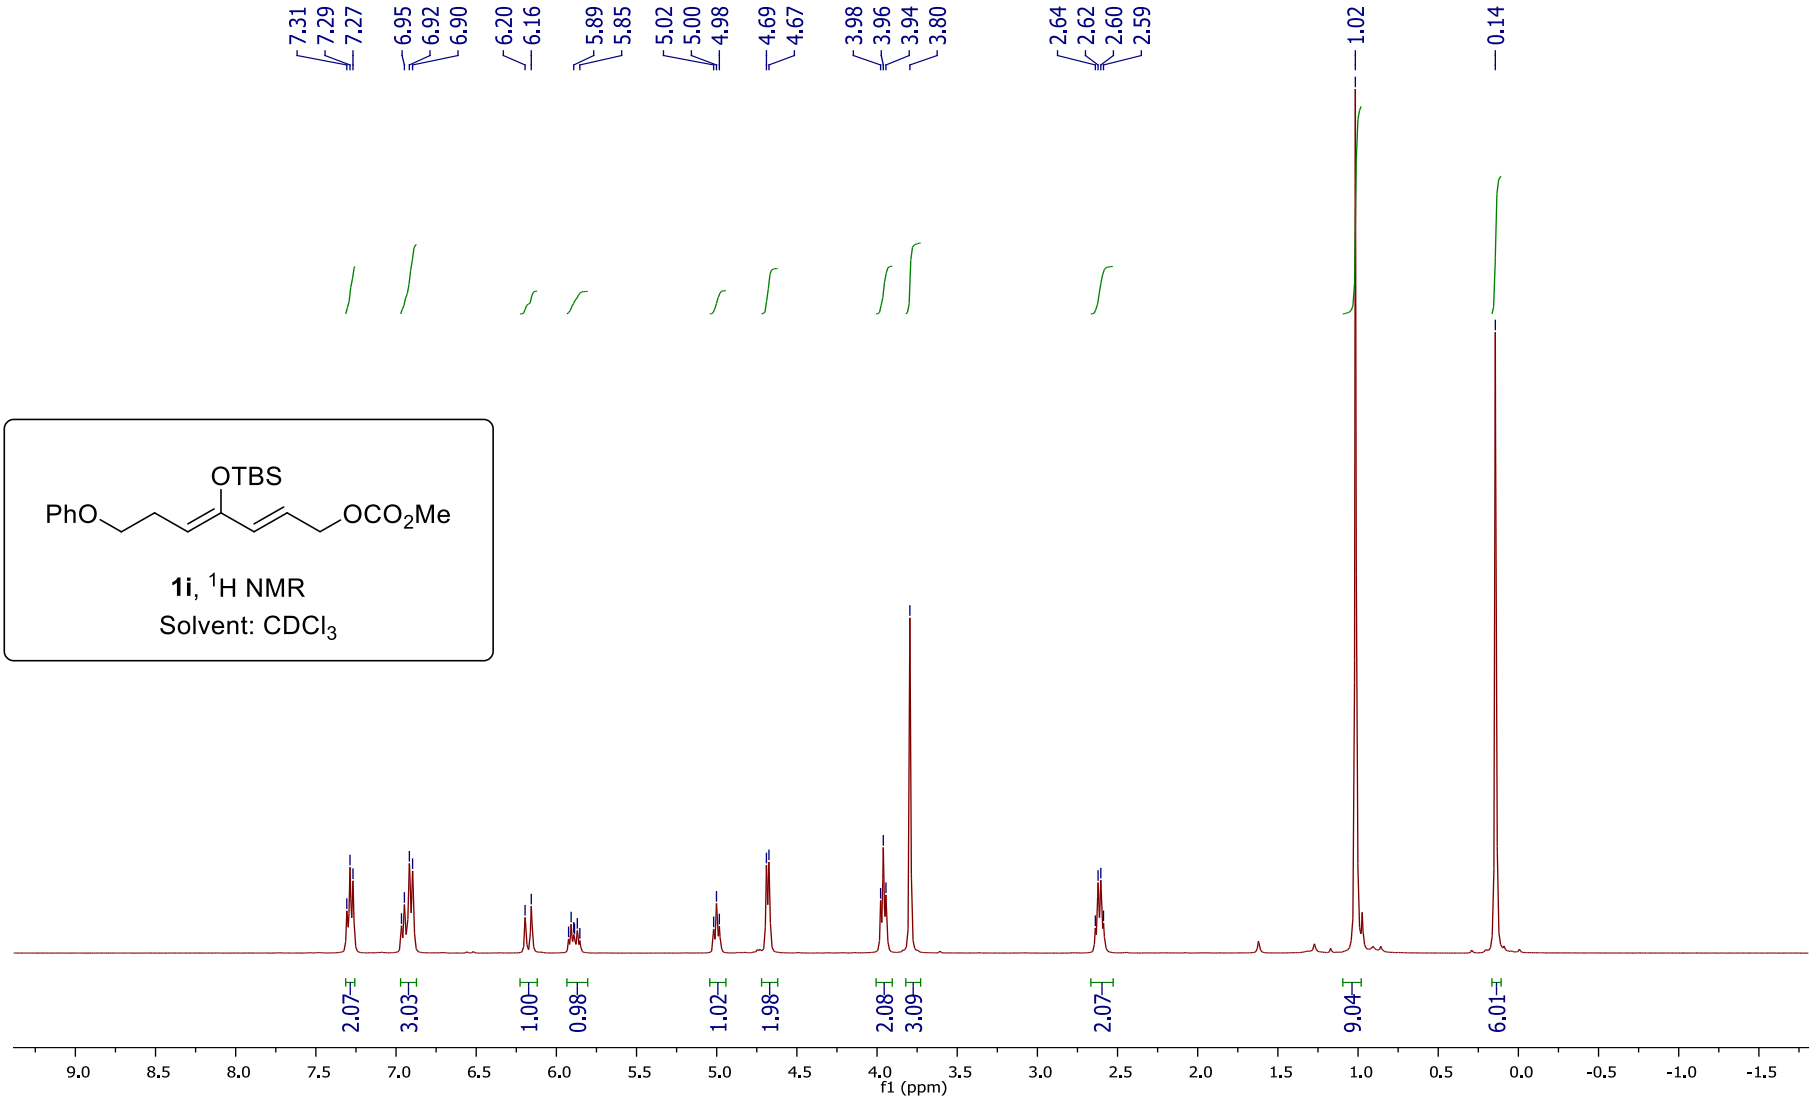

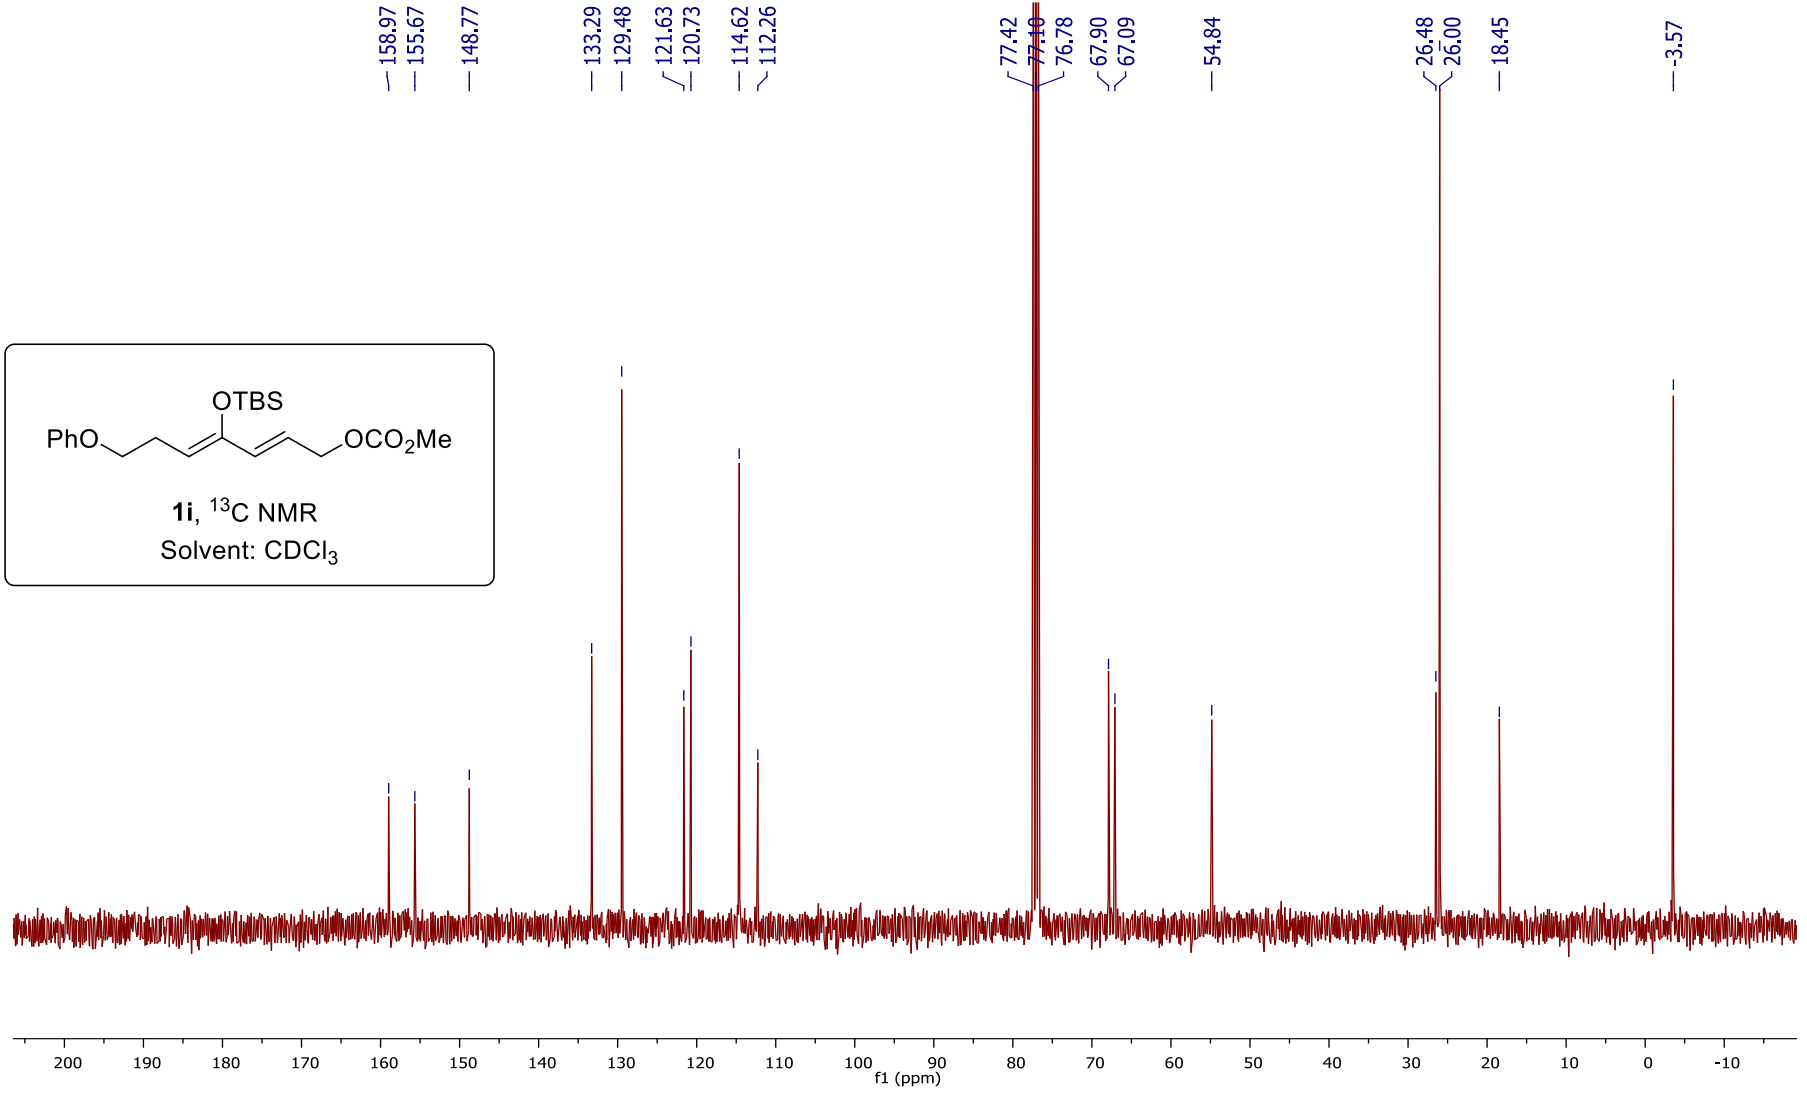

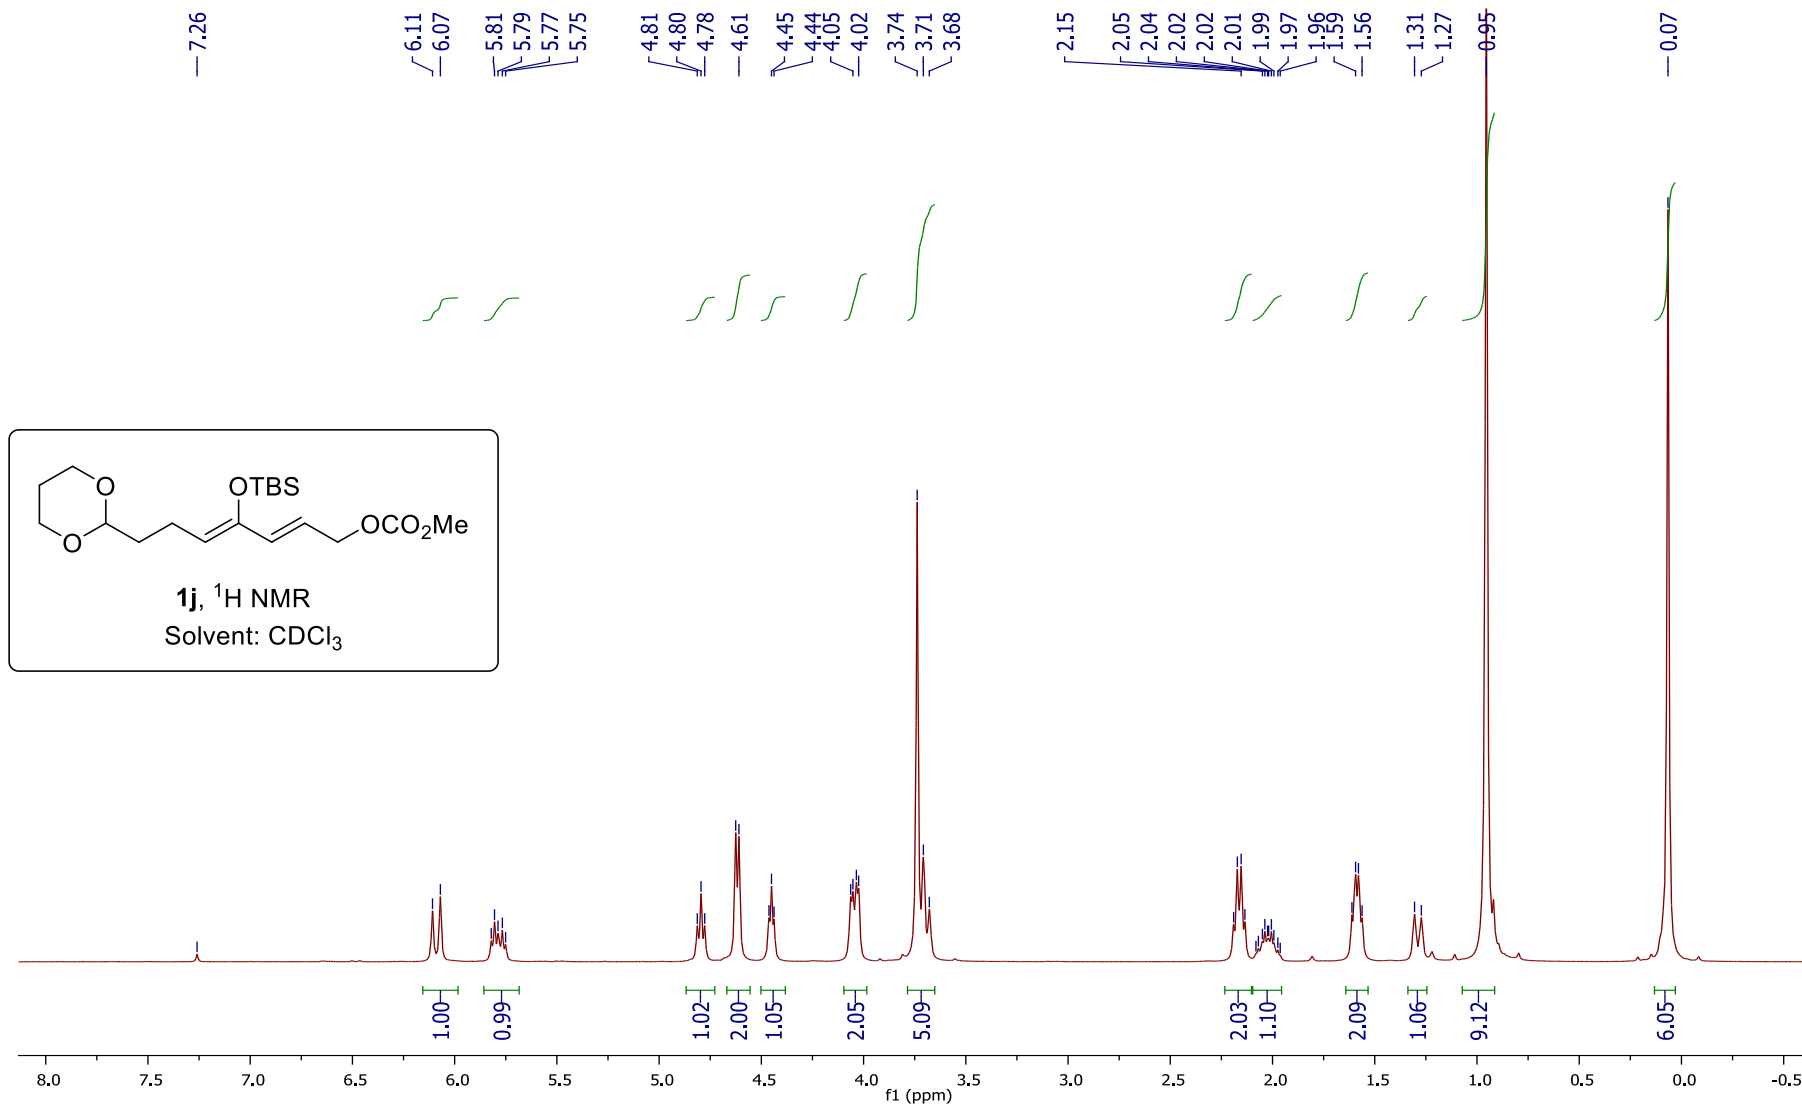

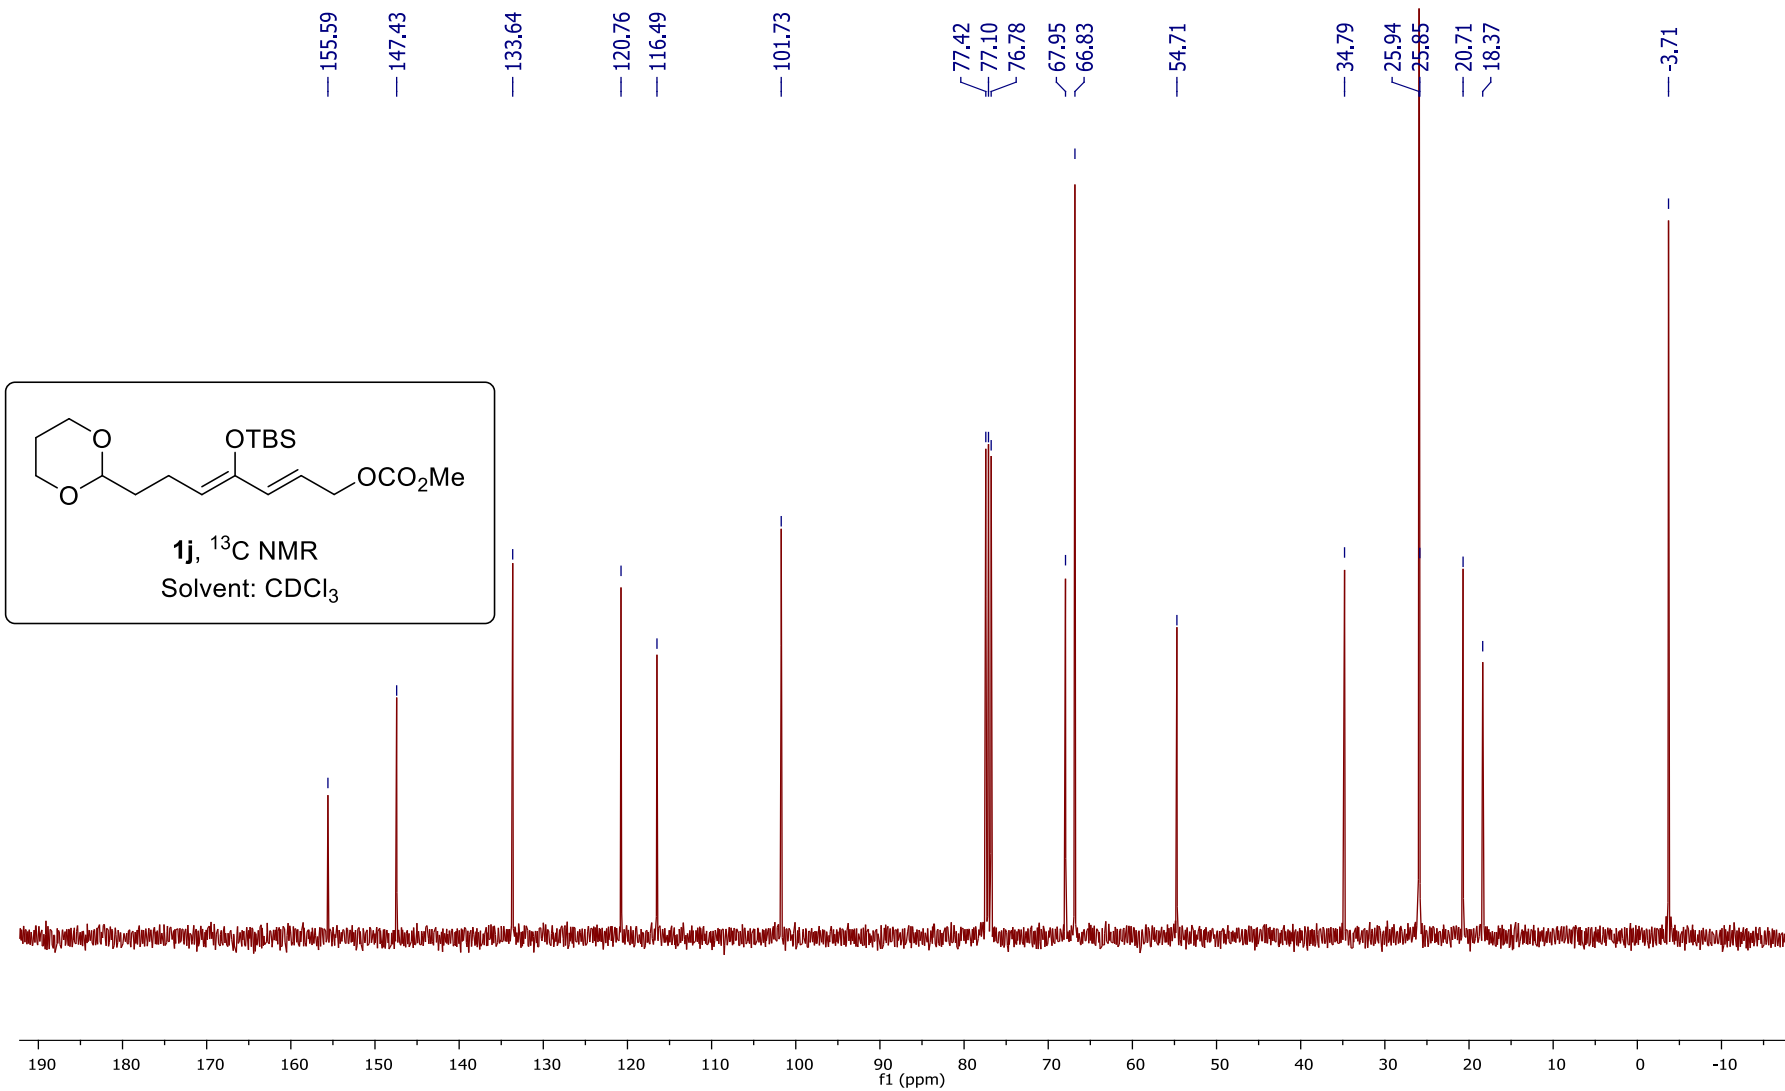

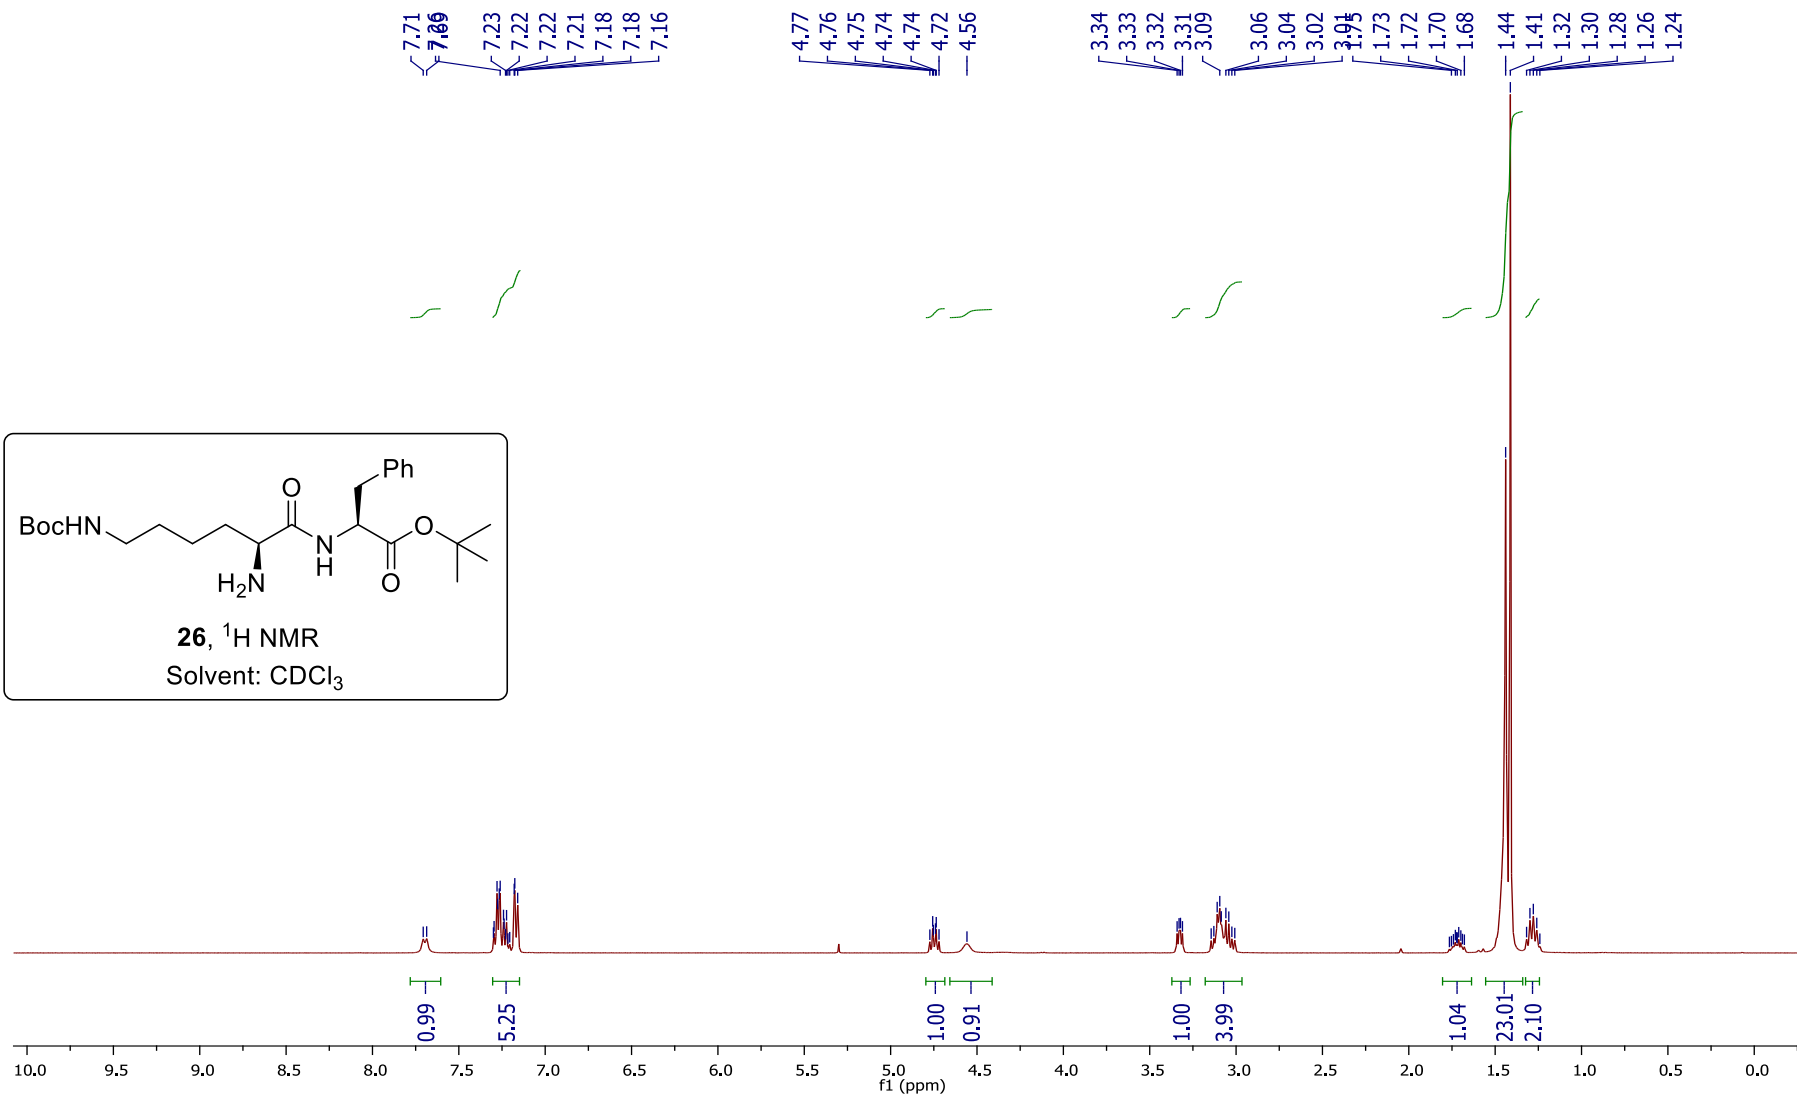

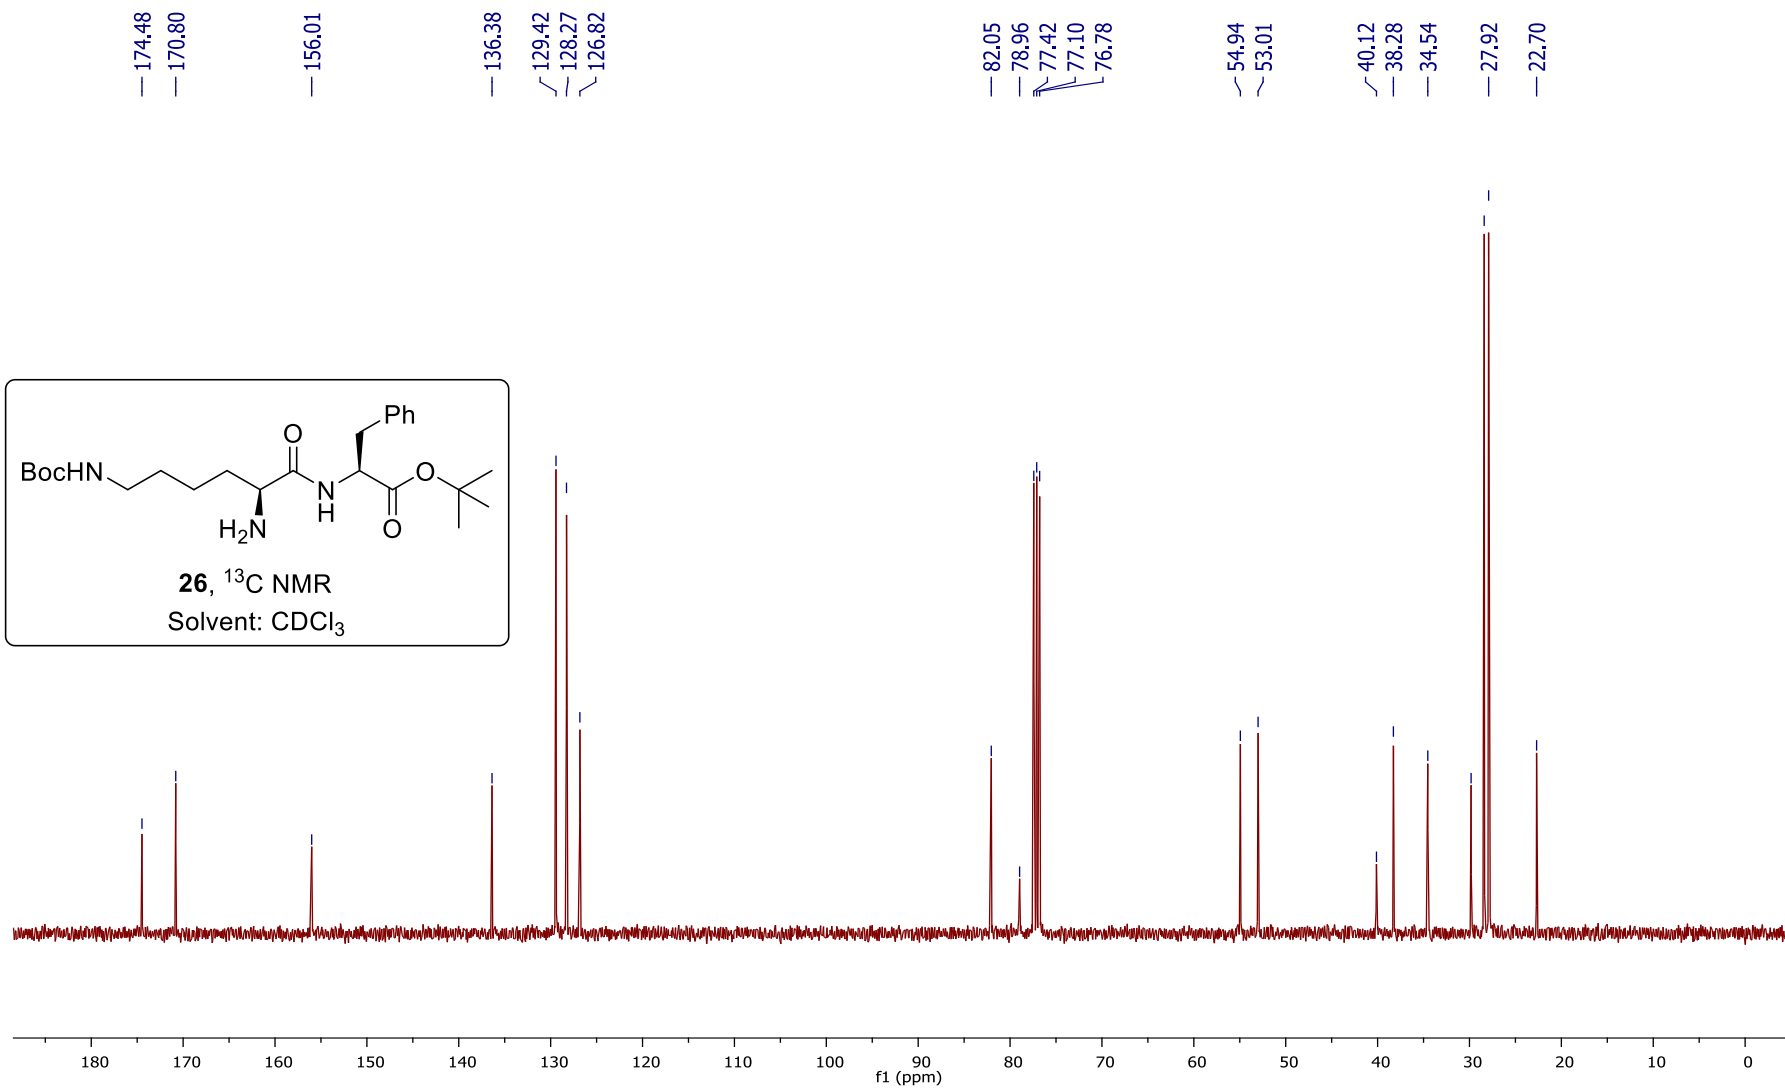

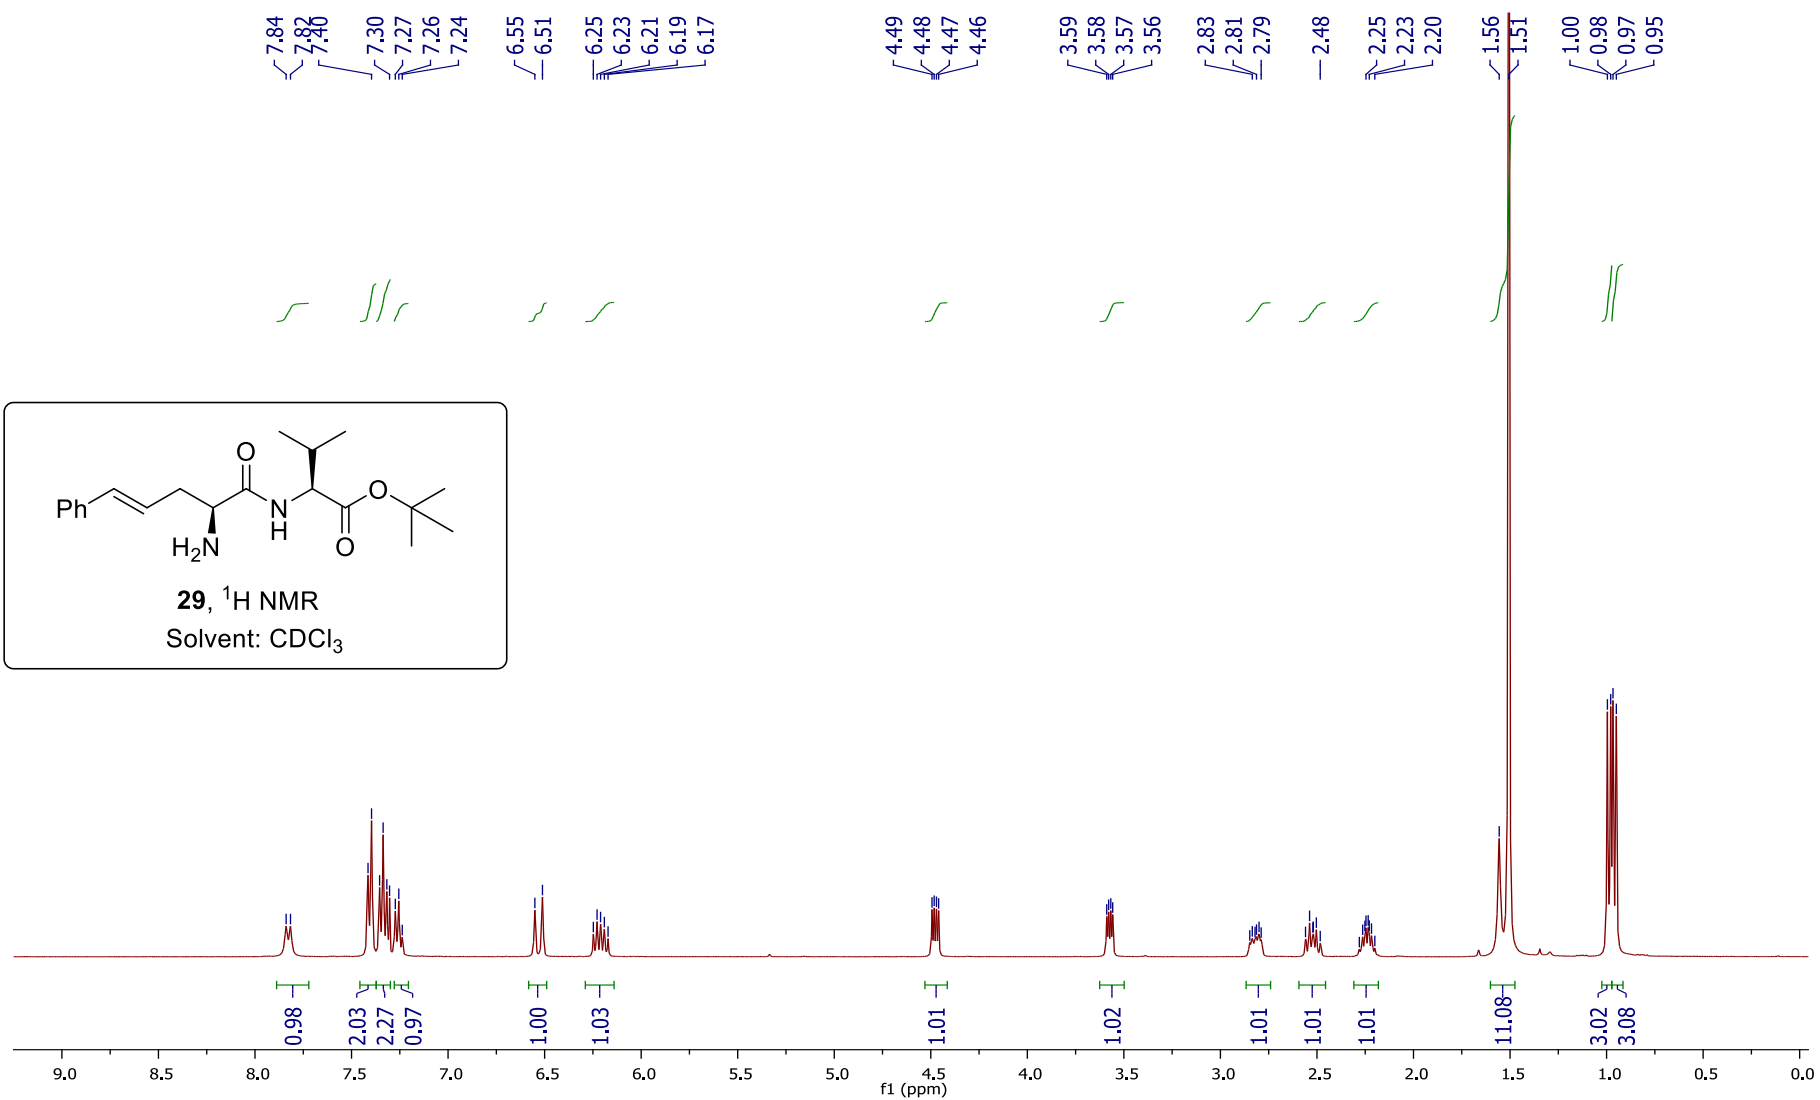



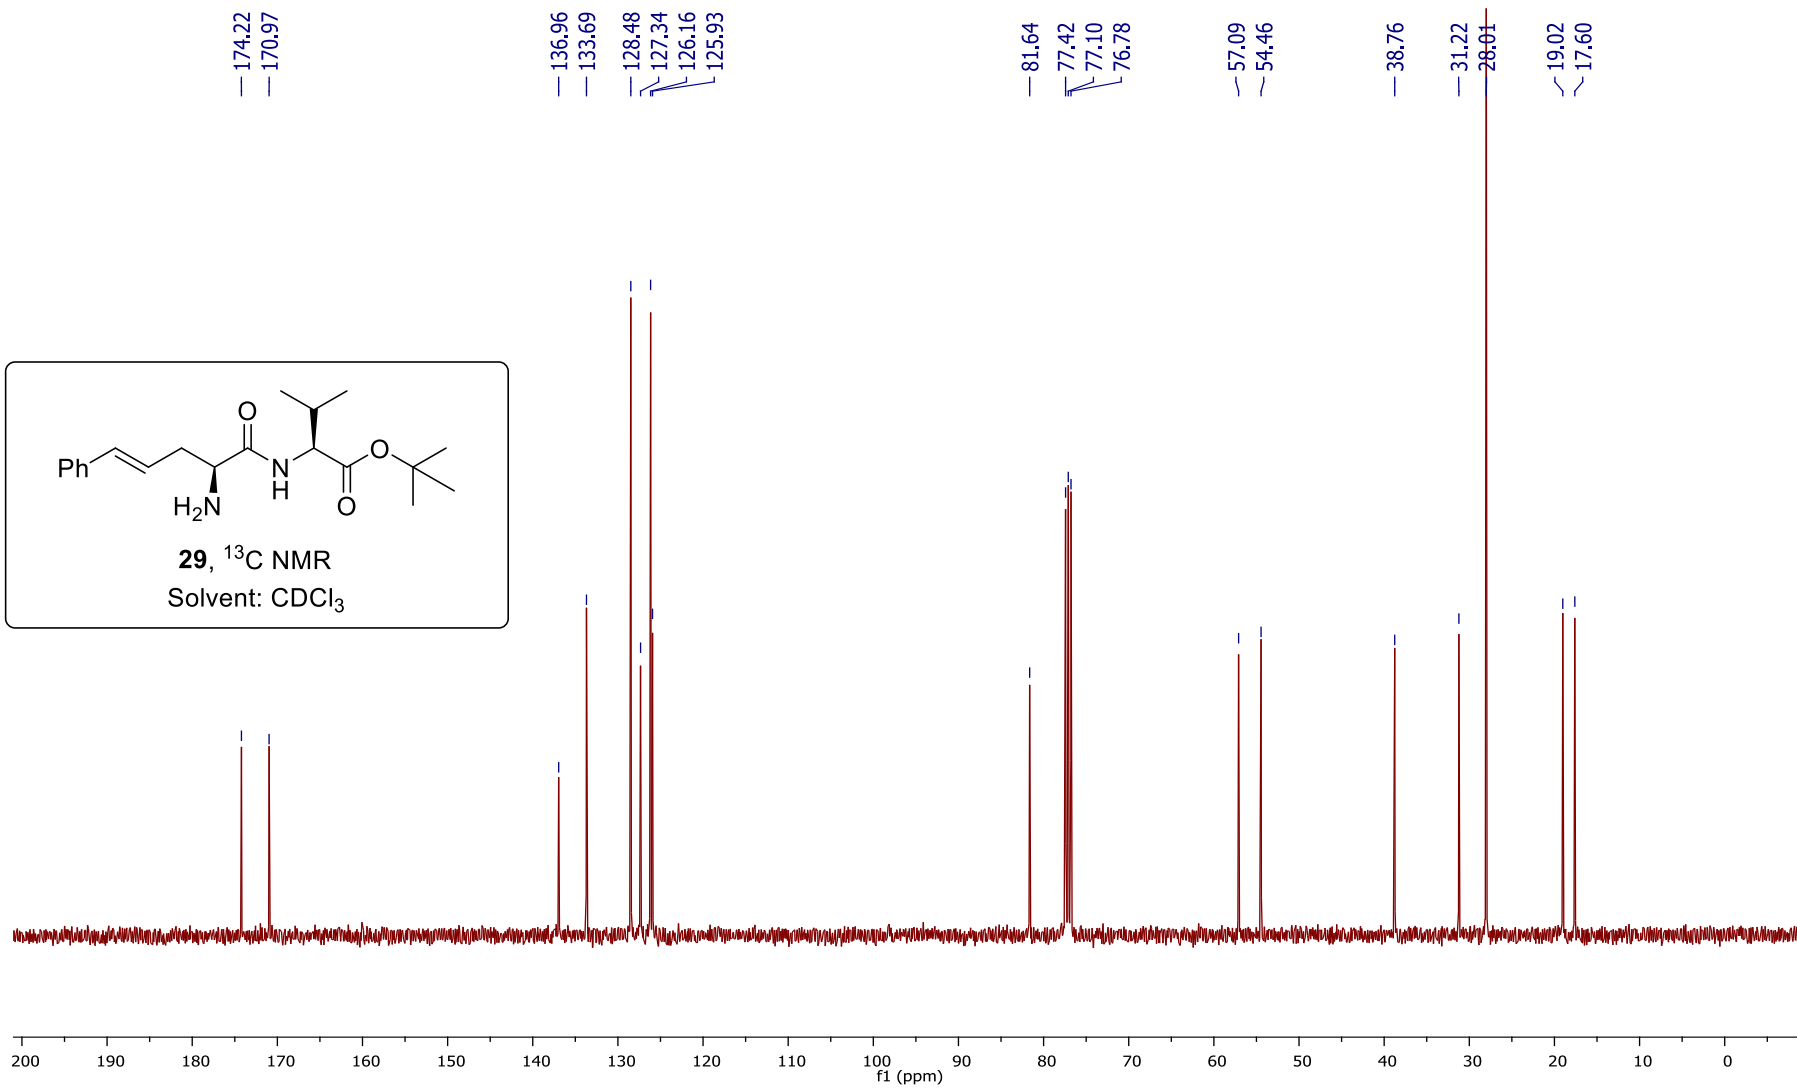

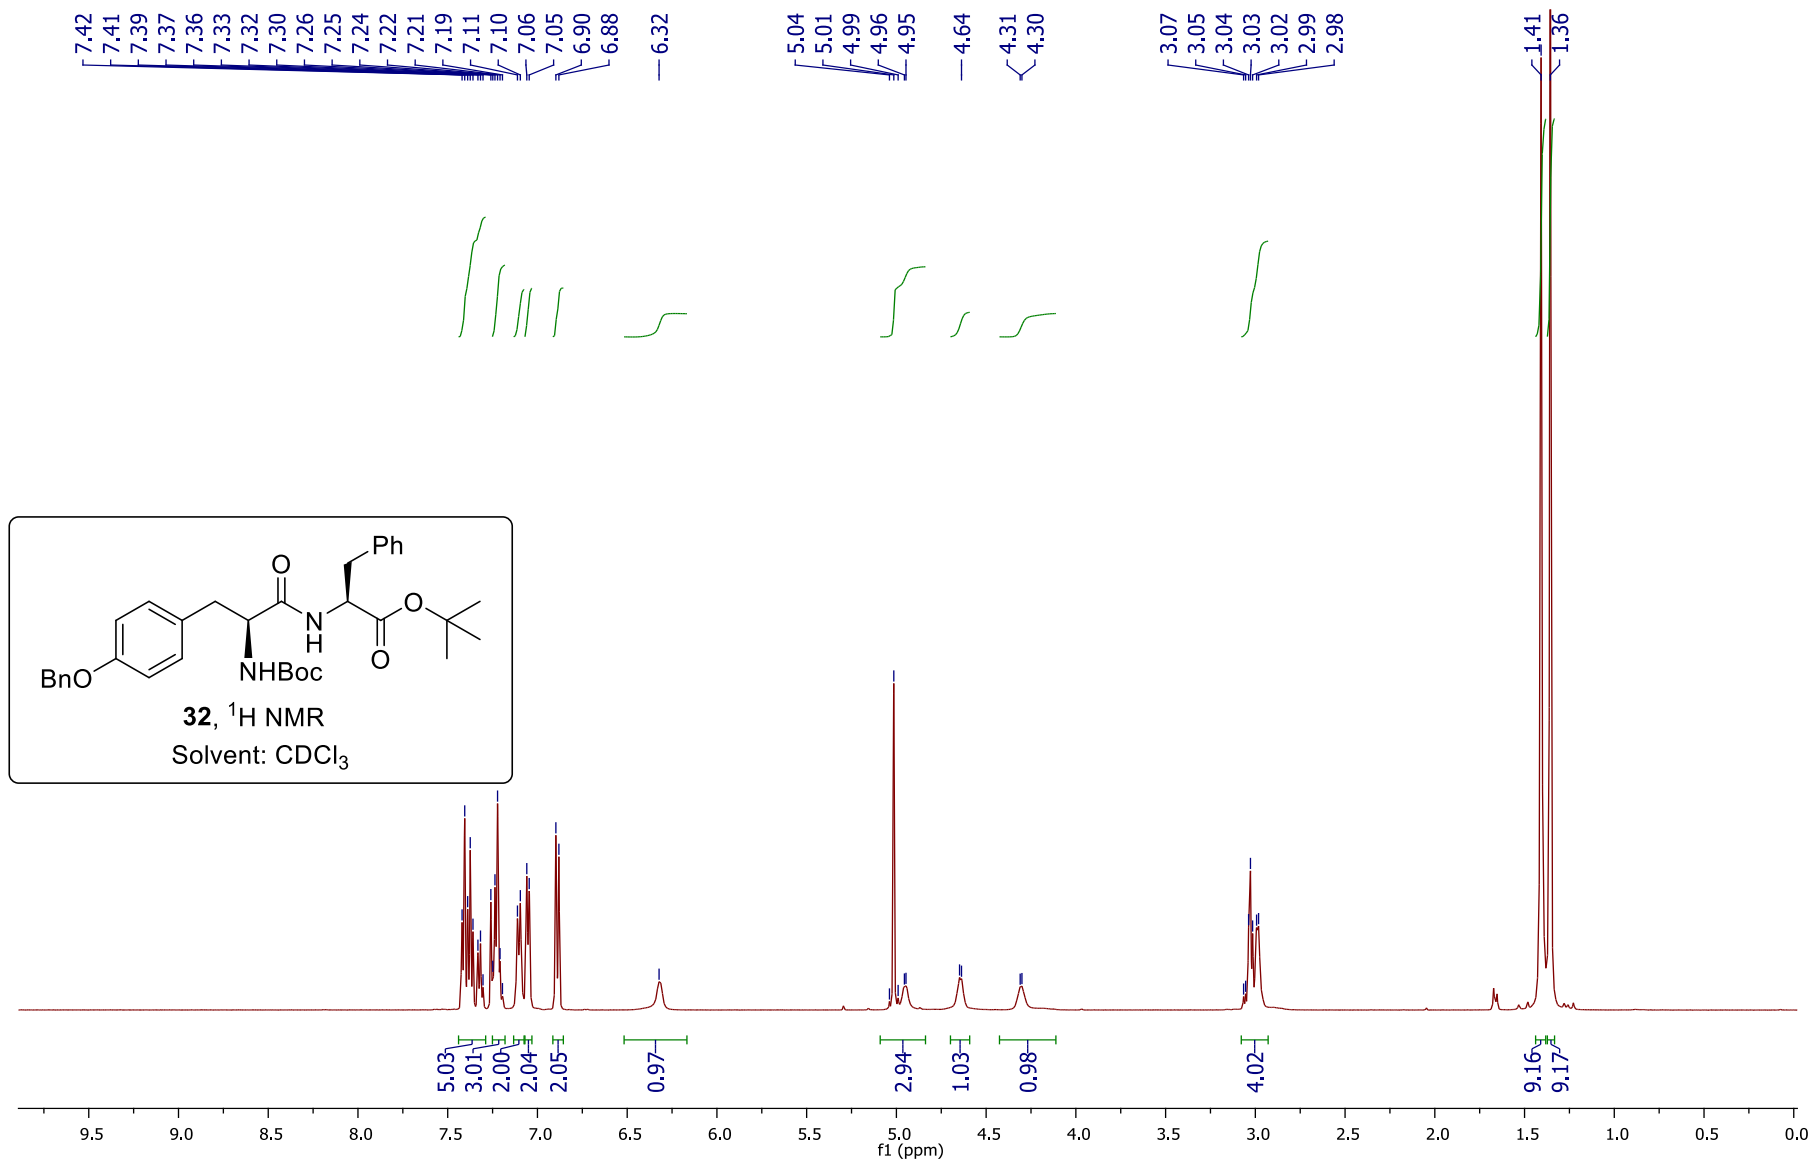

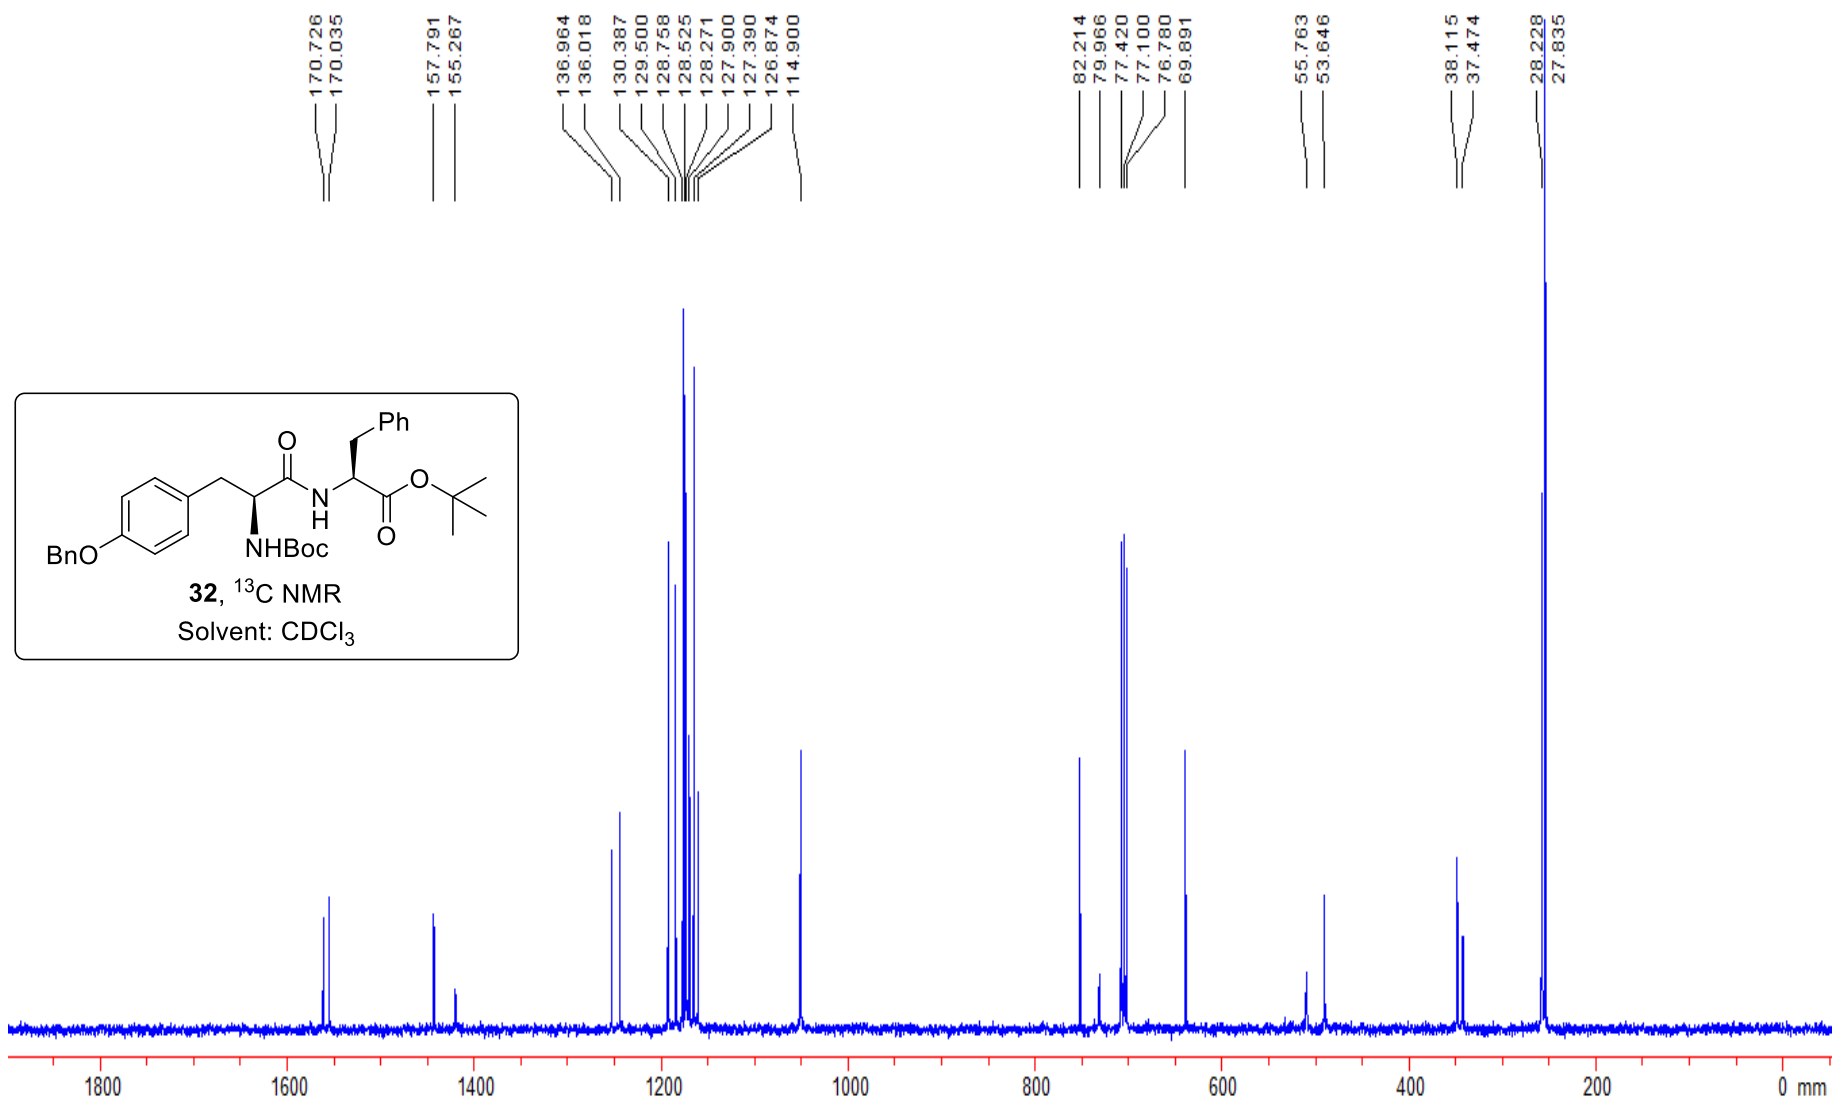

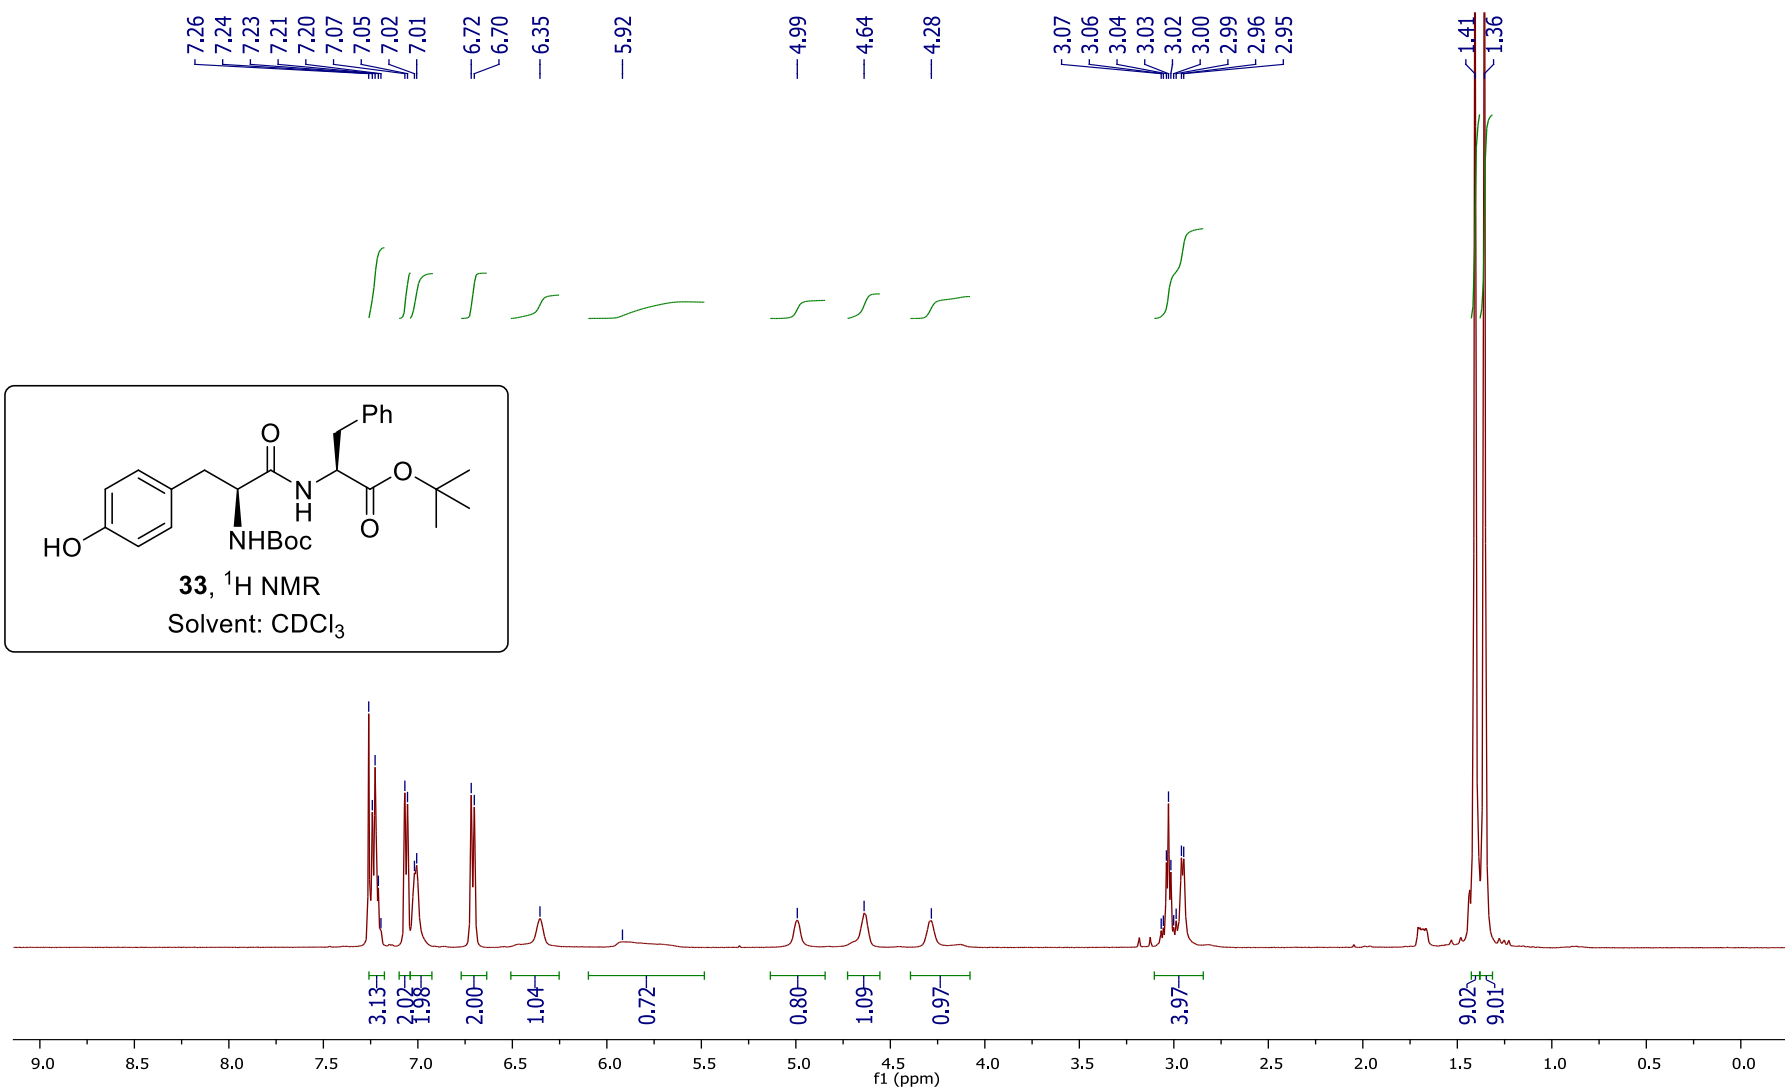

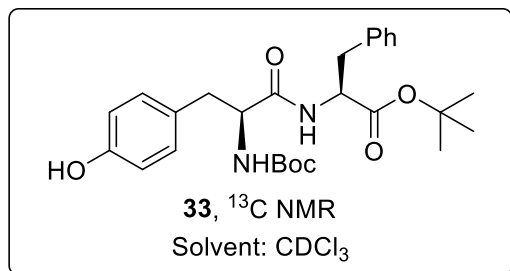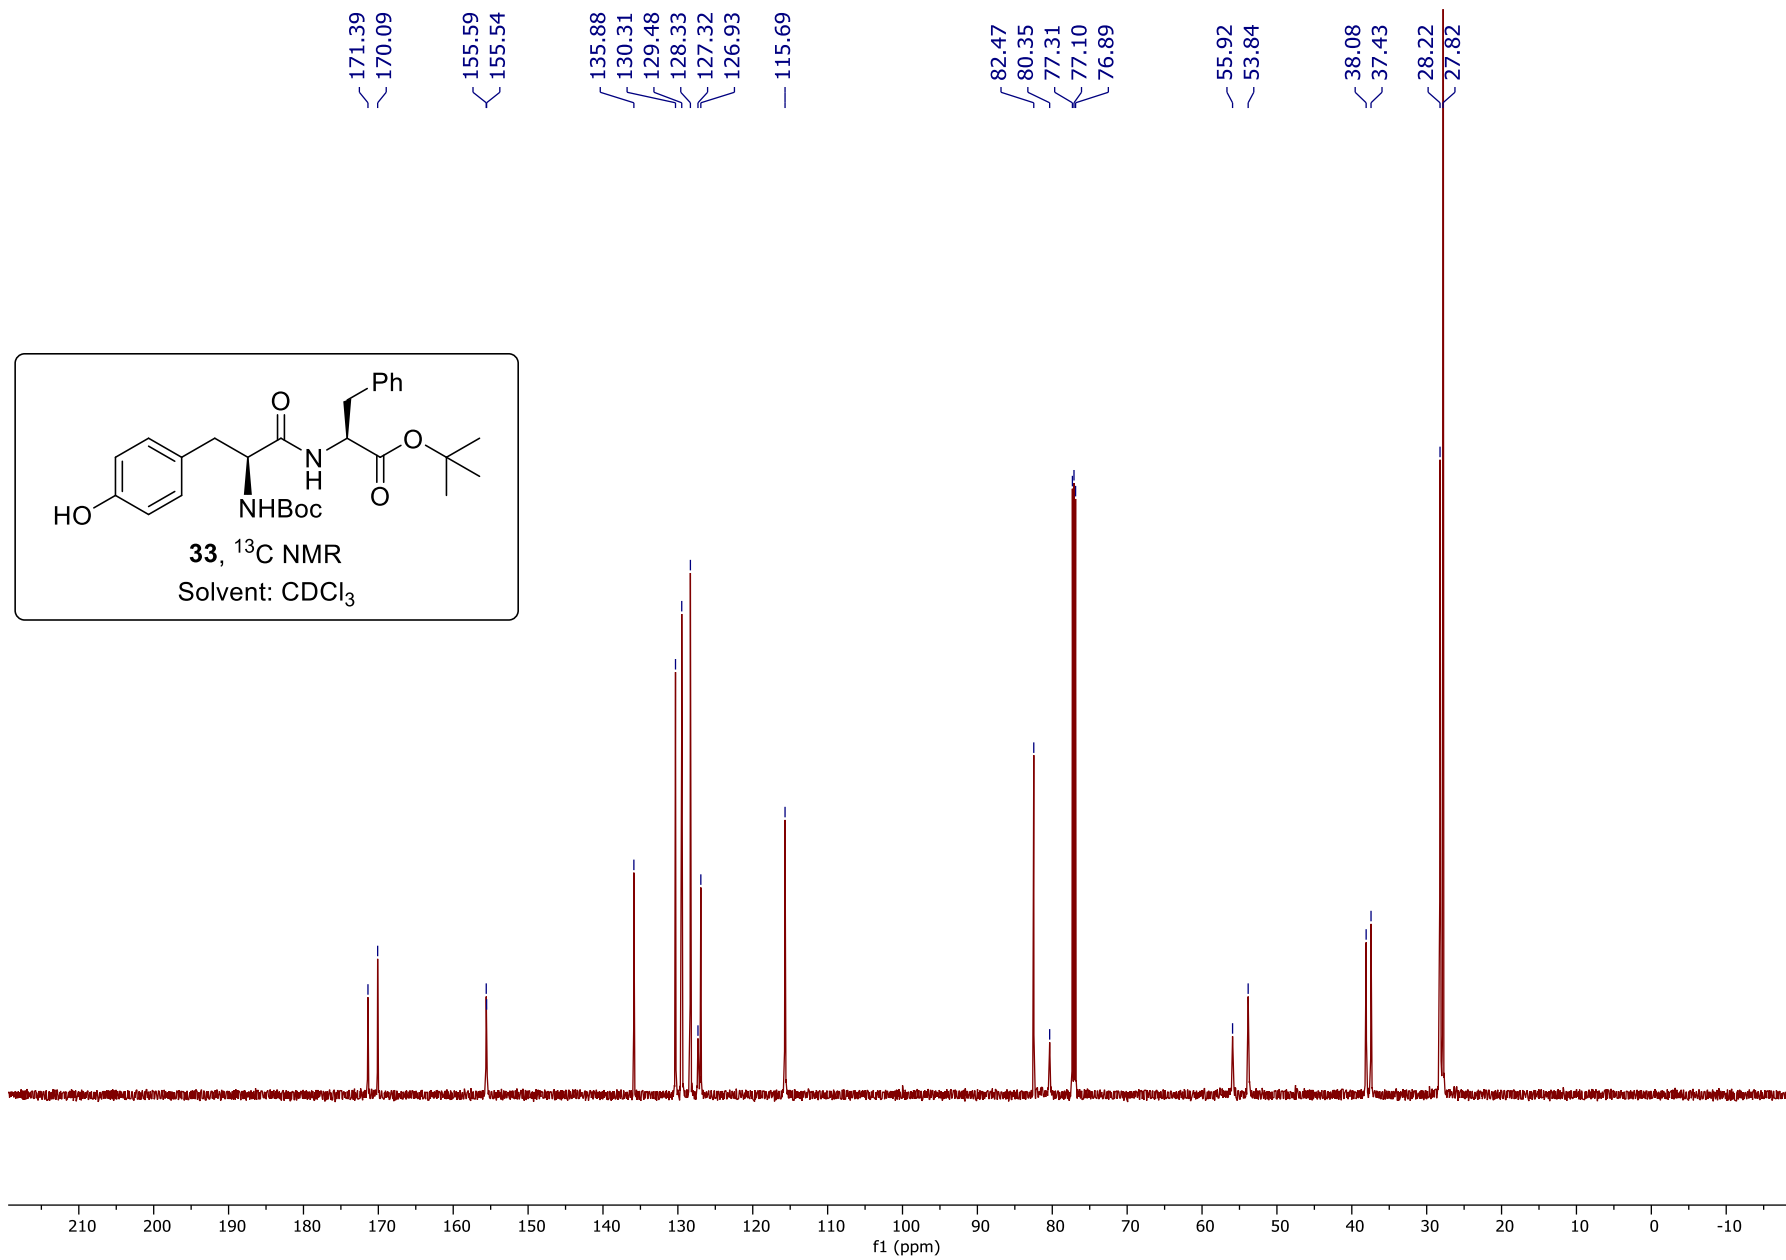

130.31  
129.48  
128.32  
126.93

115.68

55.90  
53.84

38.07  
37.43

28.22  
27.82

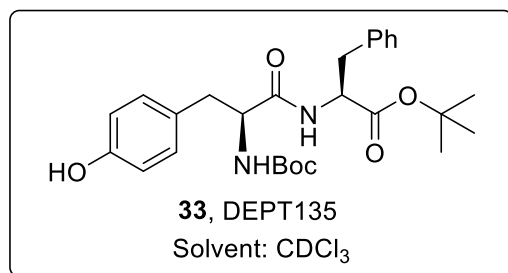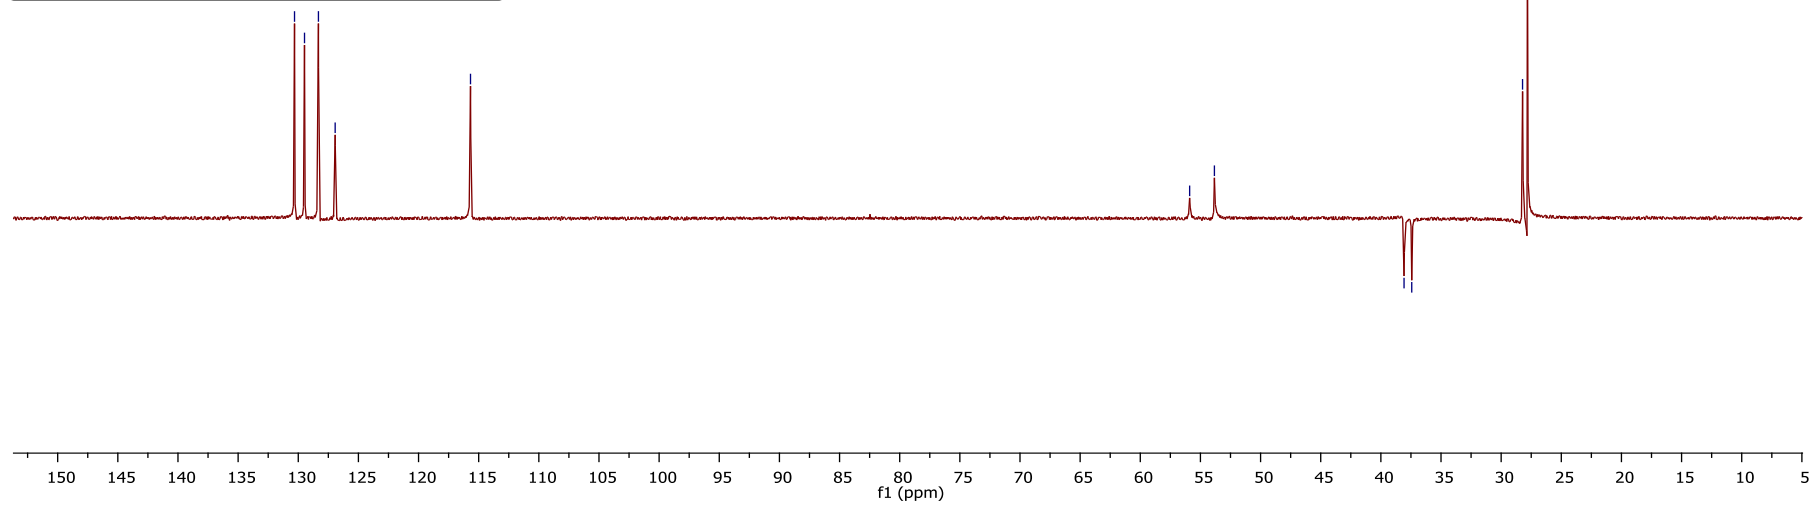

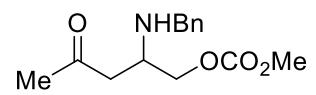

**38**,  $^1\text{H}$  NMR  
Solvent:  $\text{CDCl}_3$

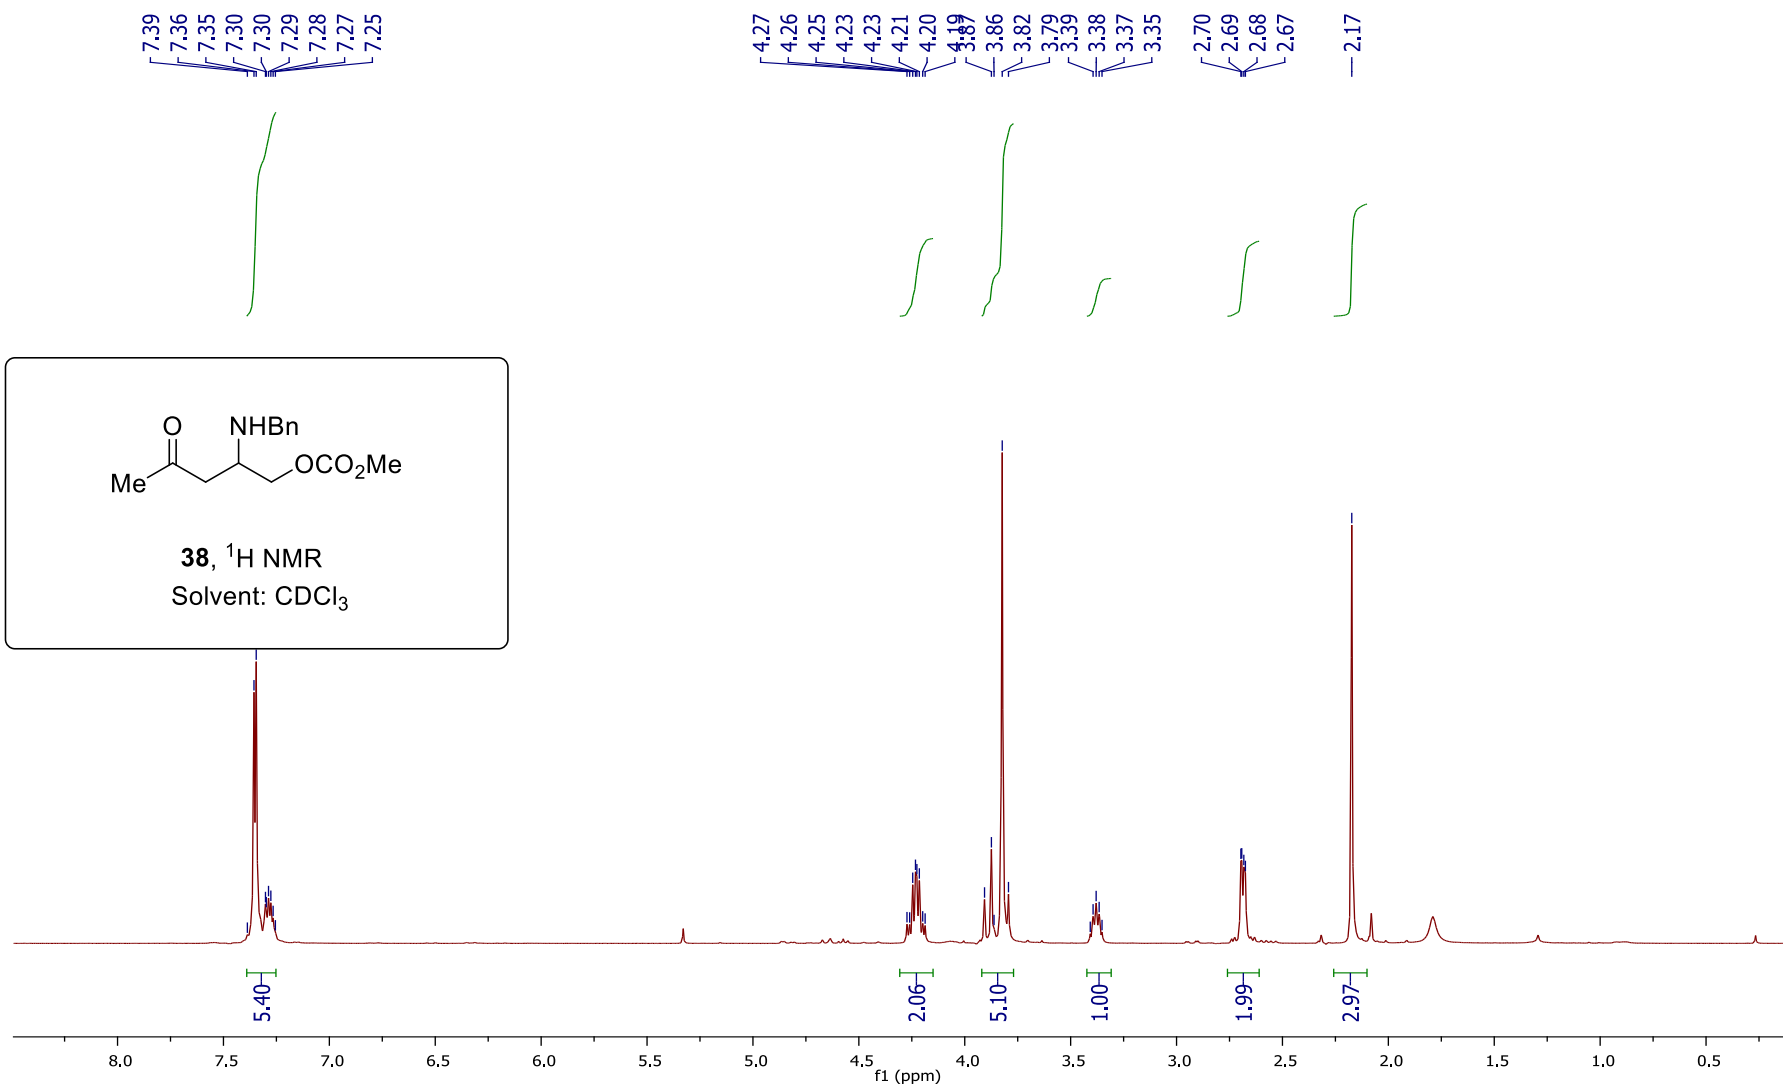

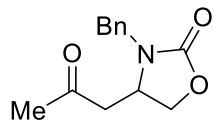

**39**,  $^1\text{H NMR}$   
Solvent:  $\text{CDCl}_3$

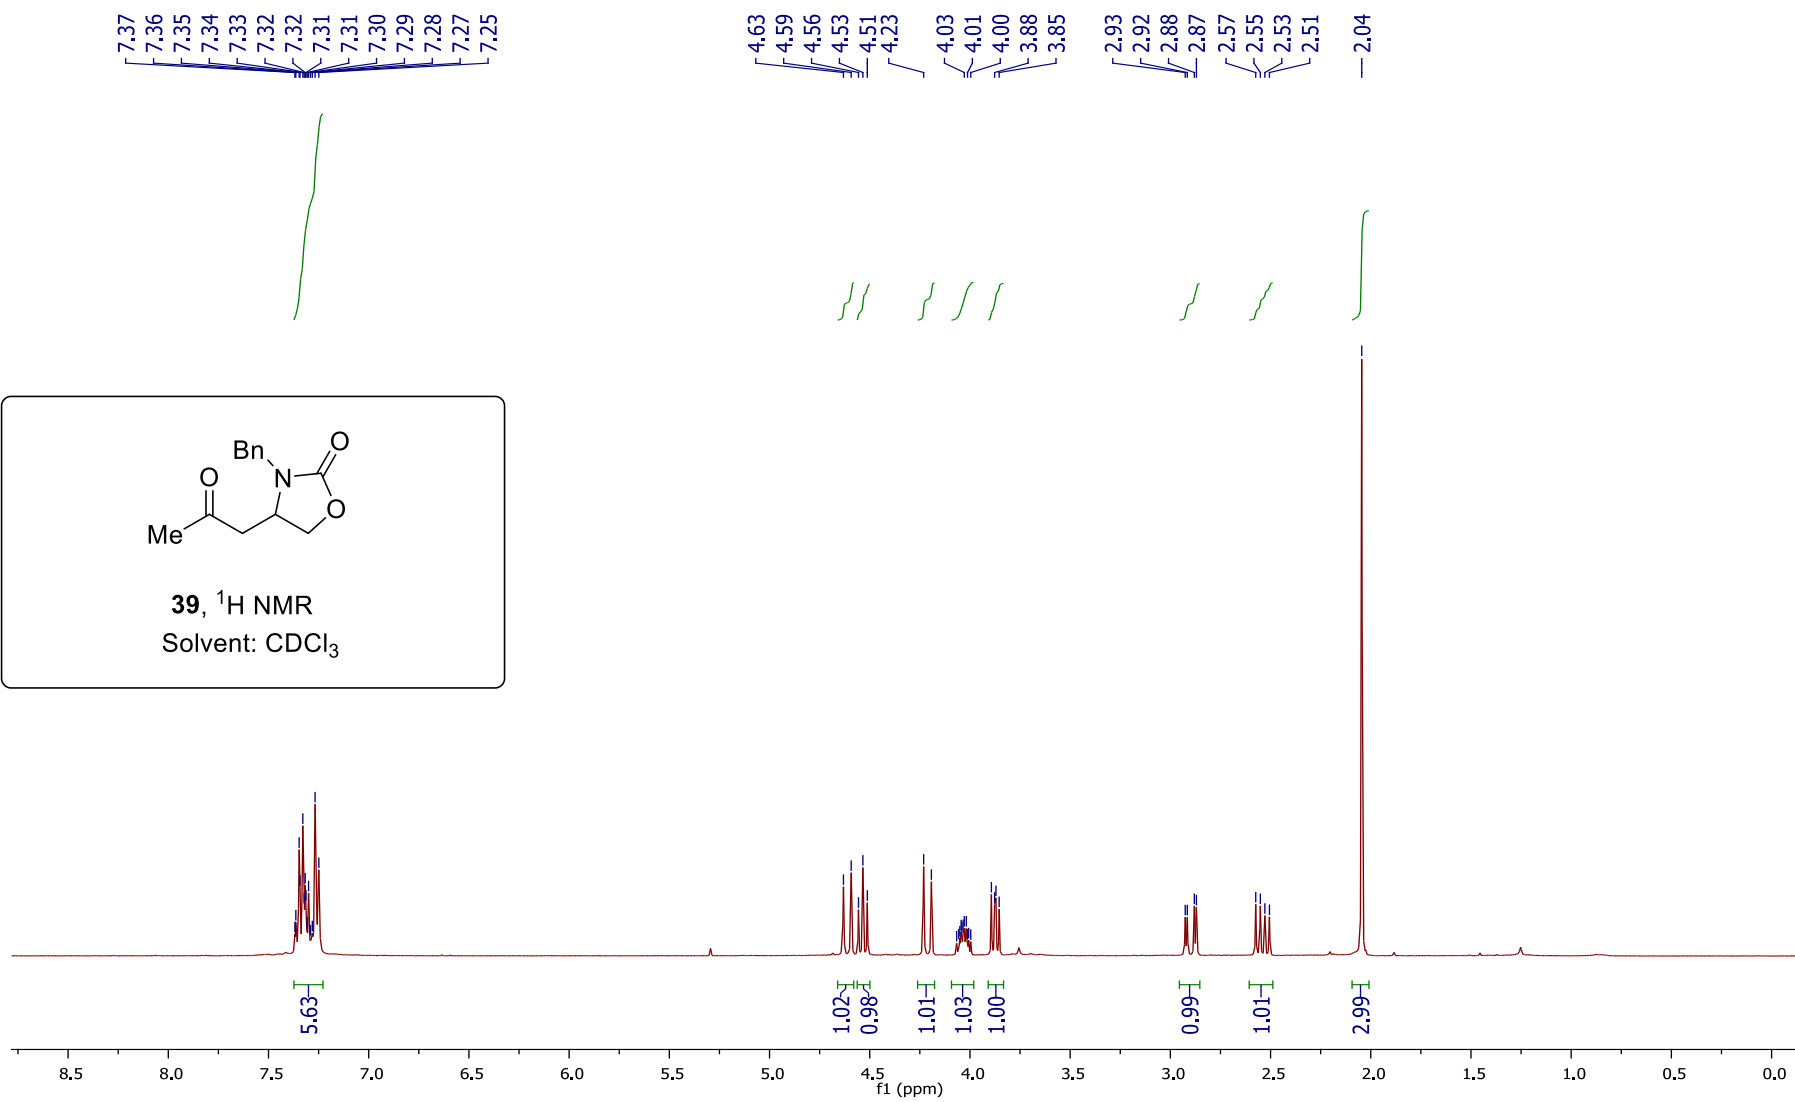



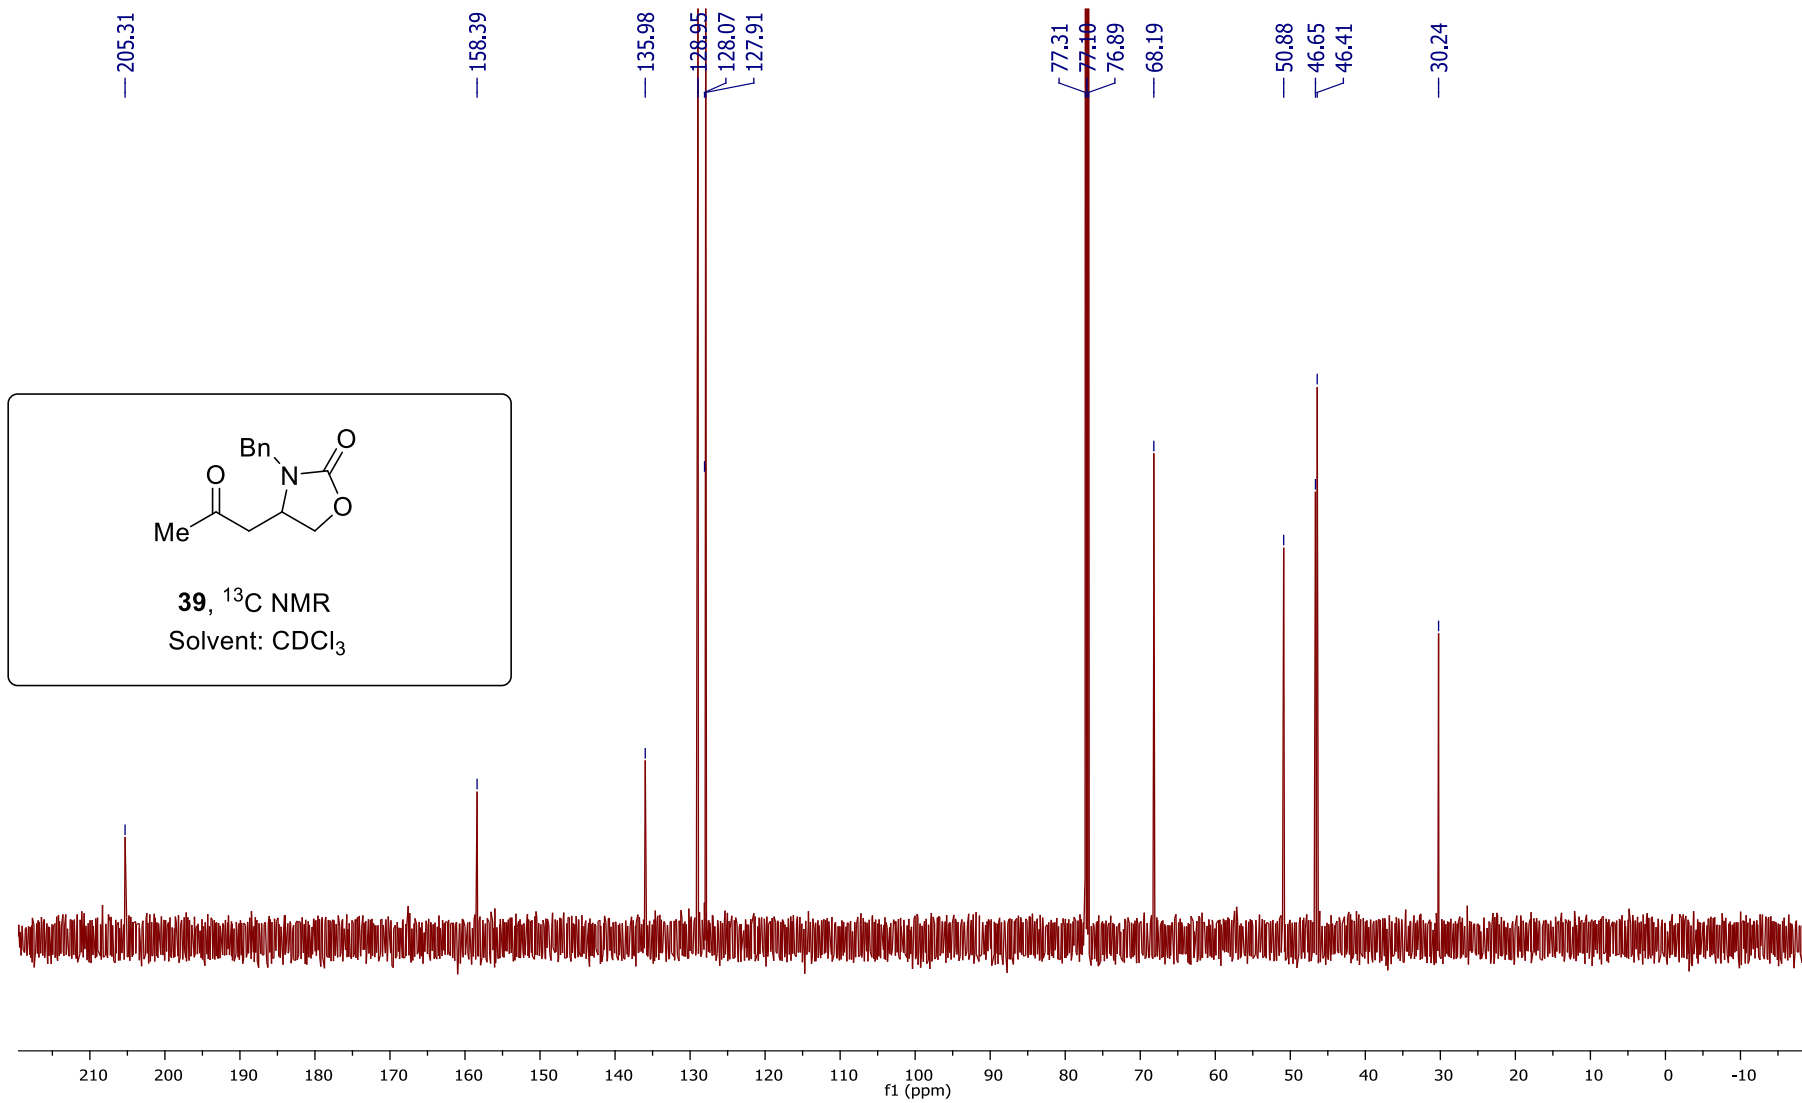

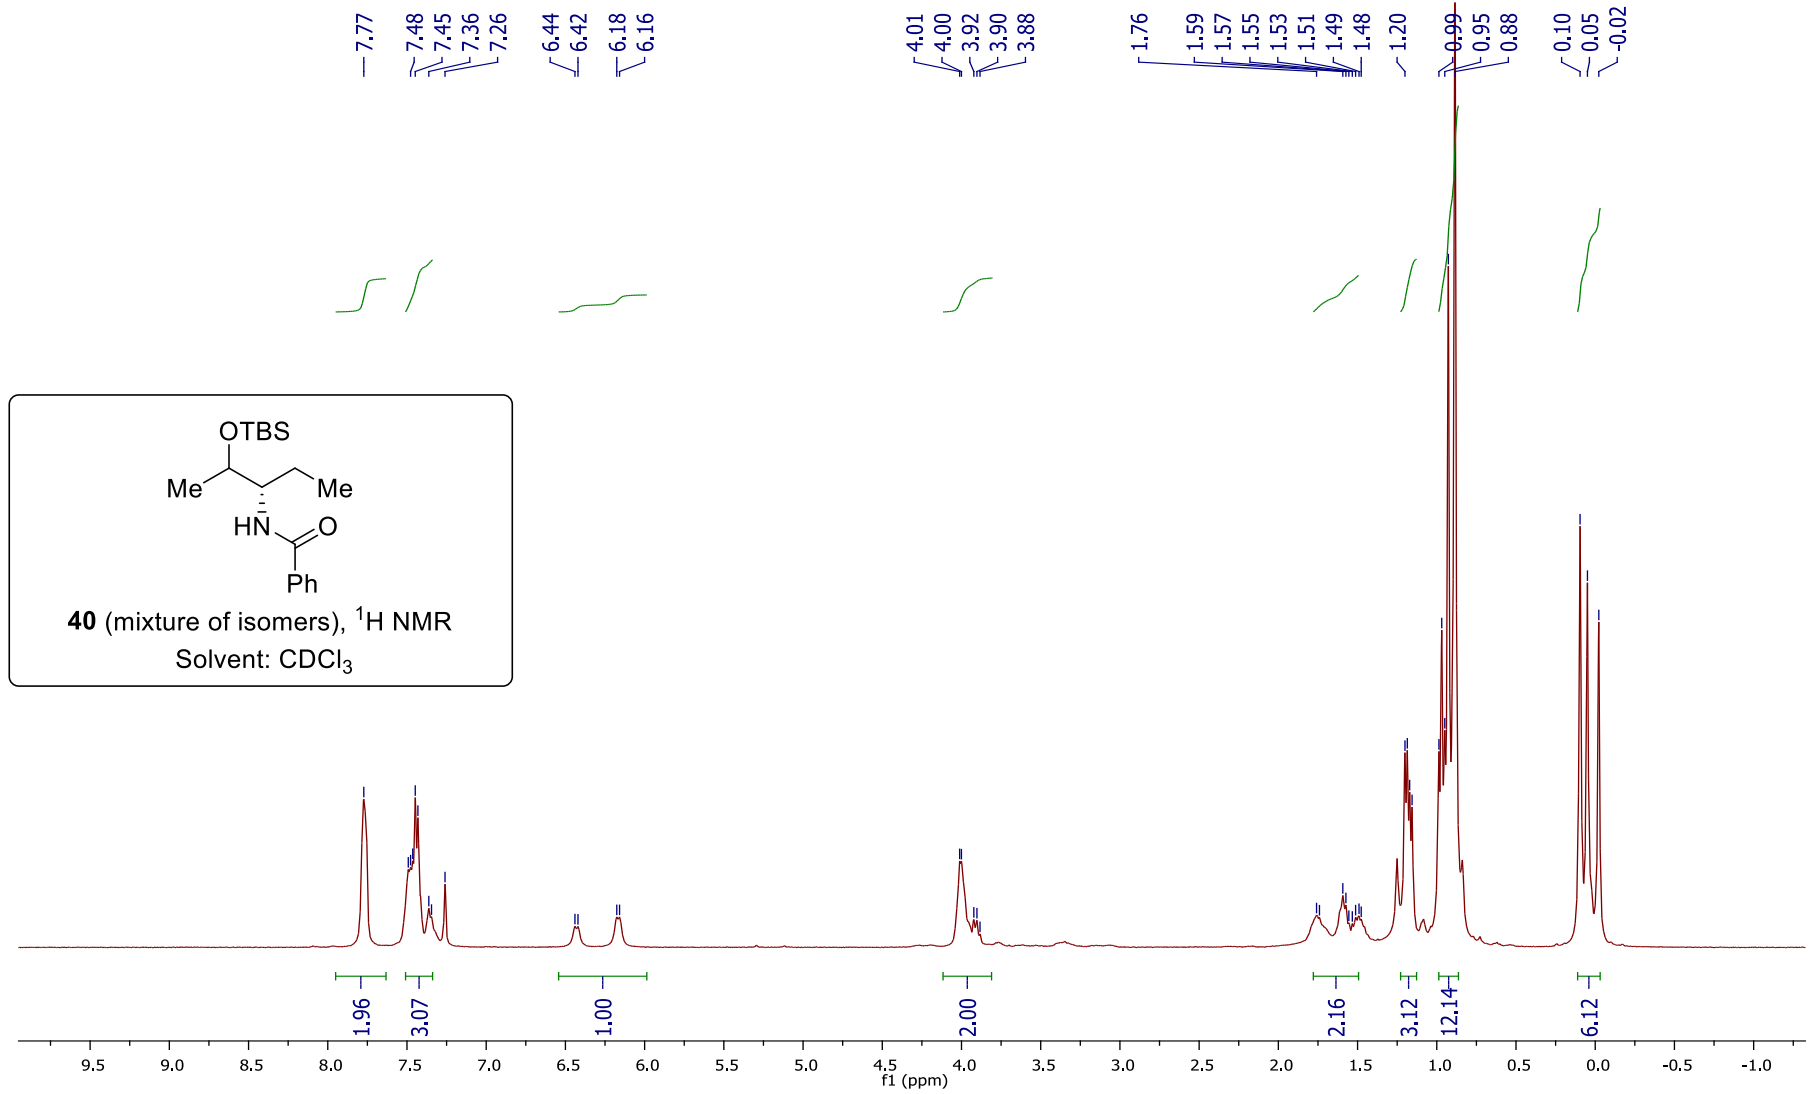



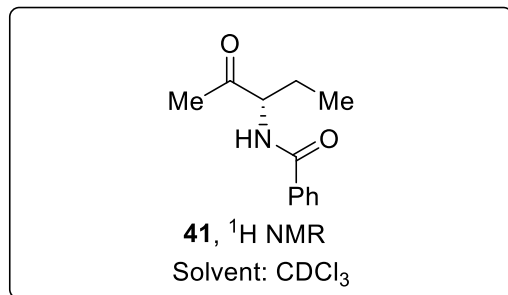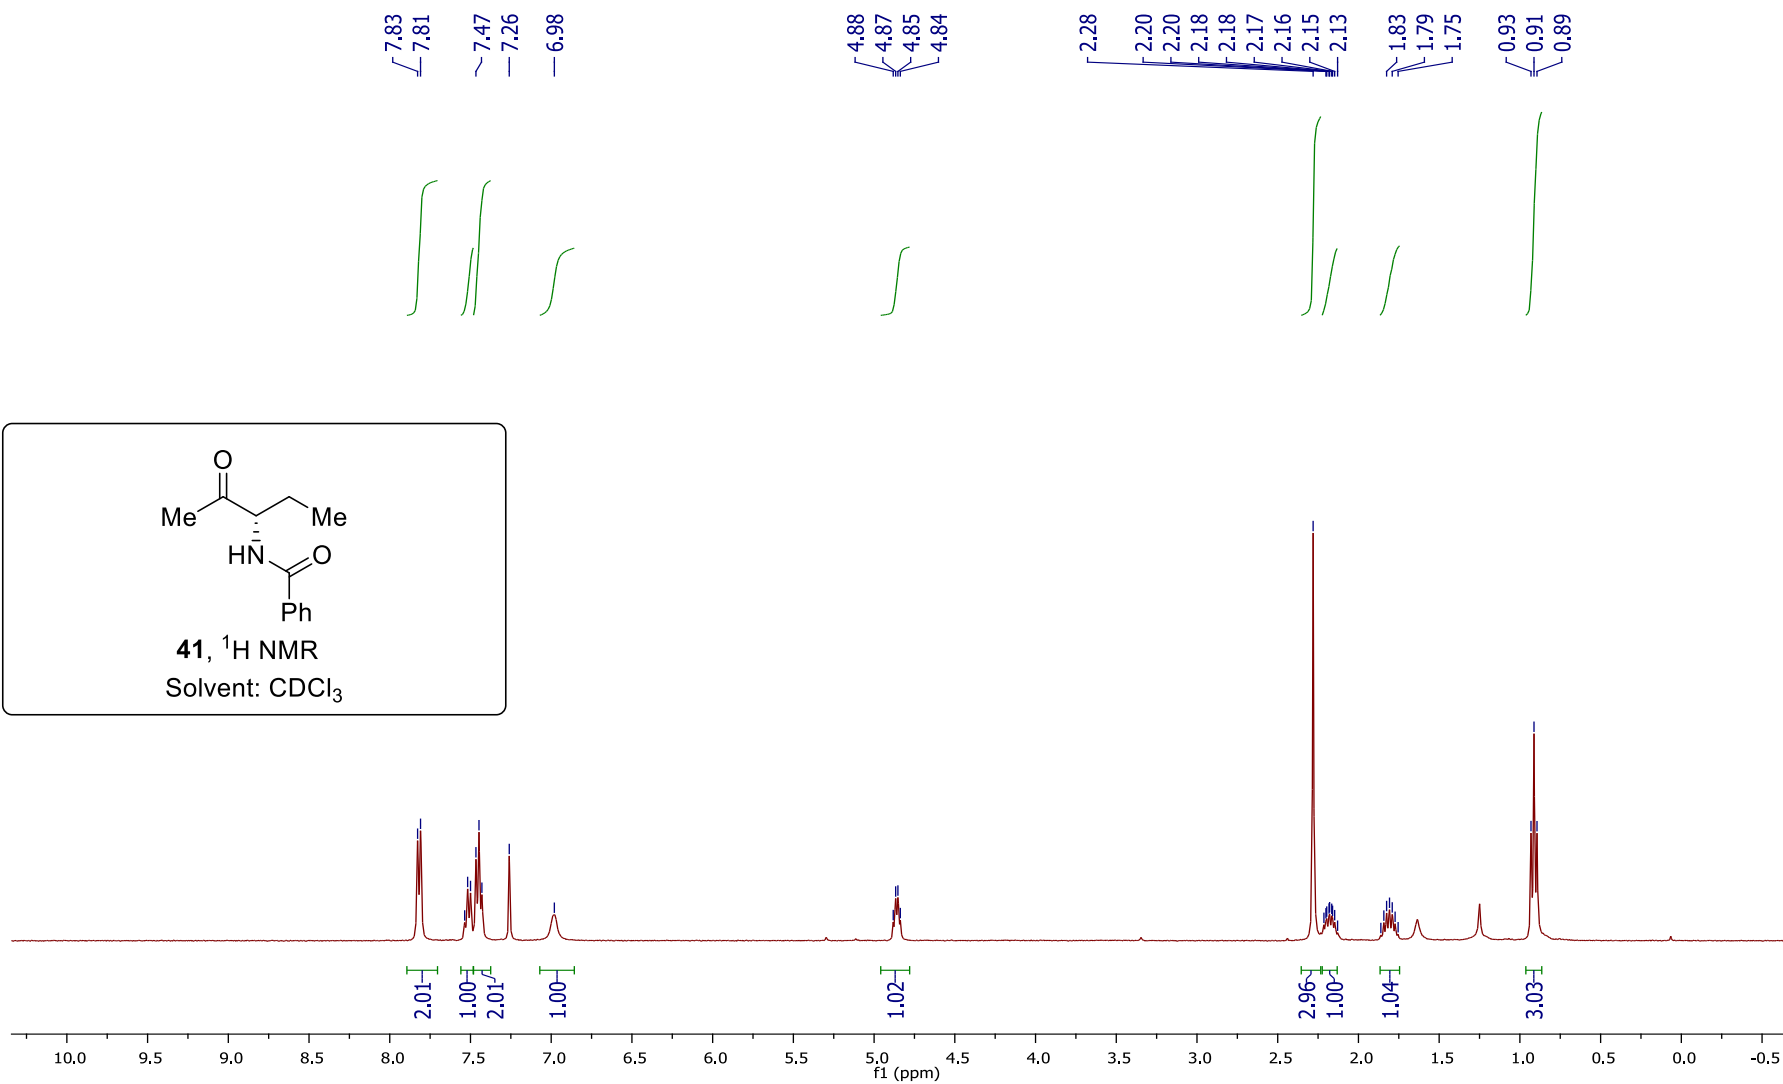

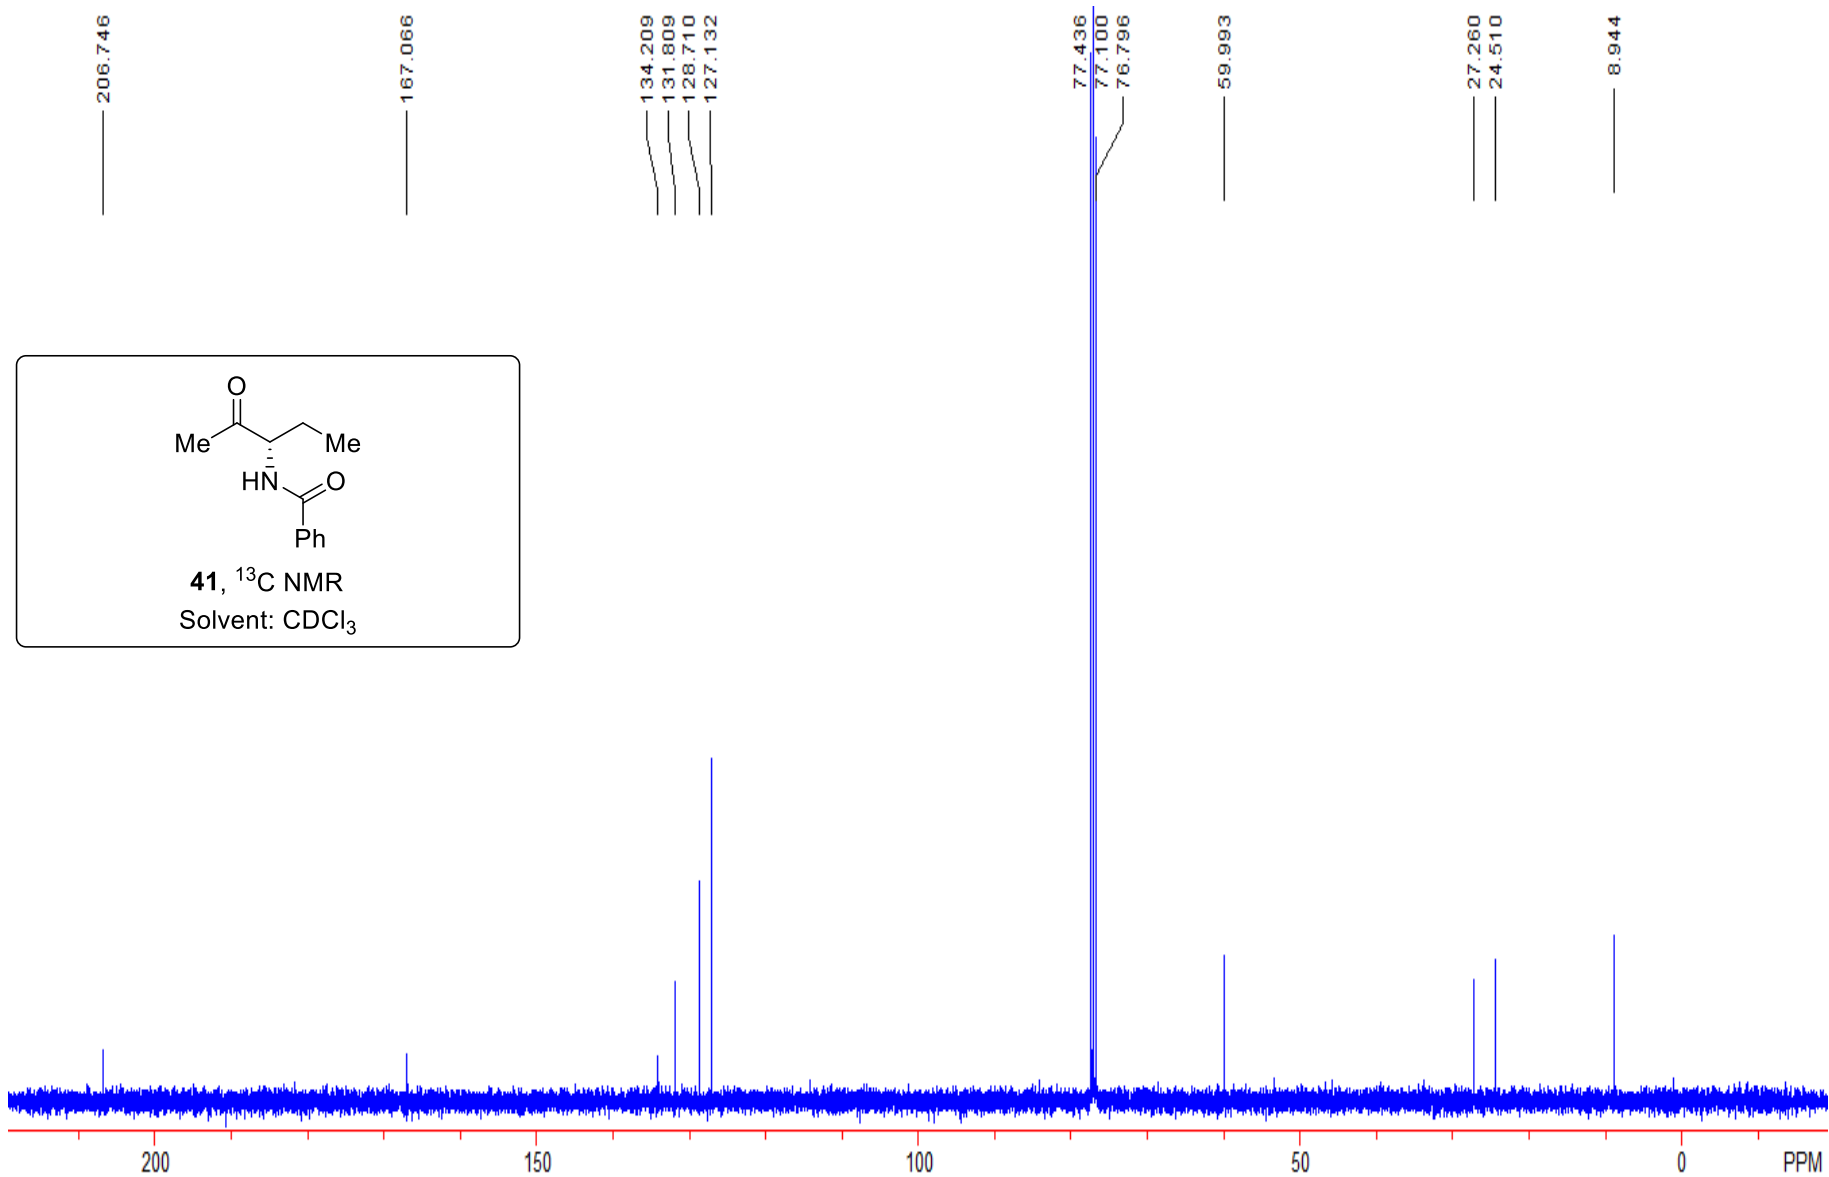

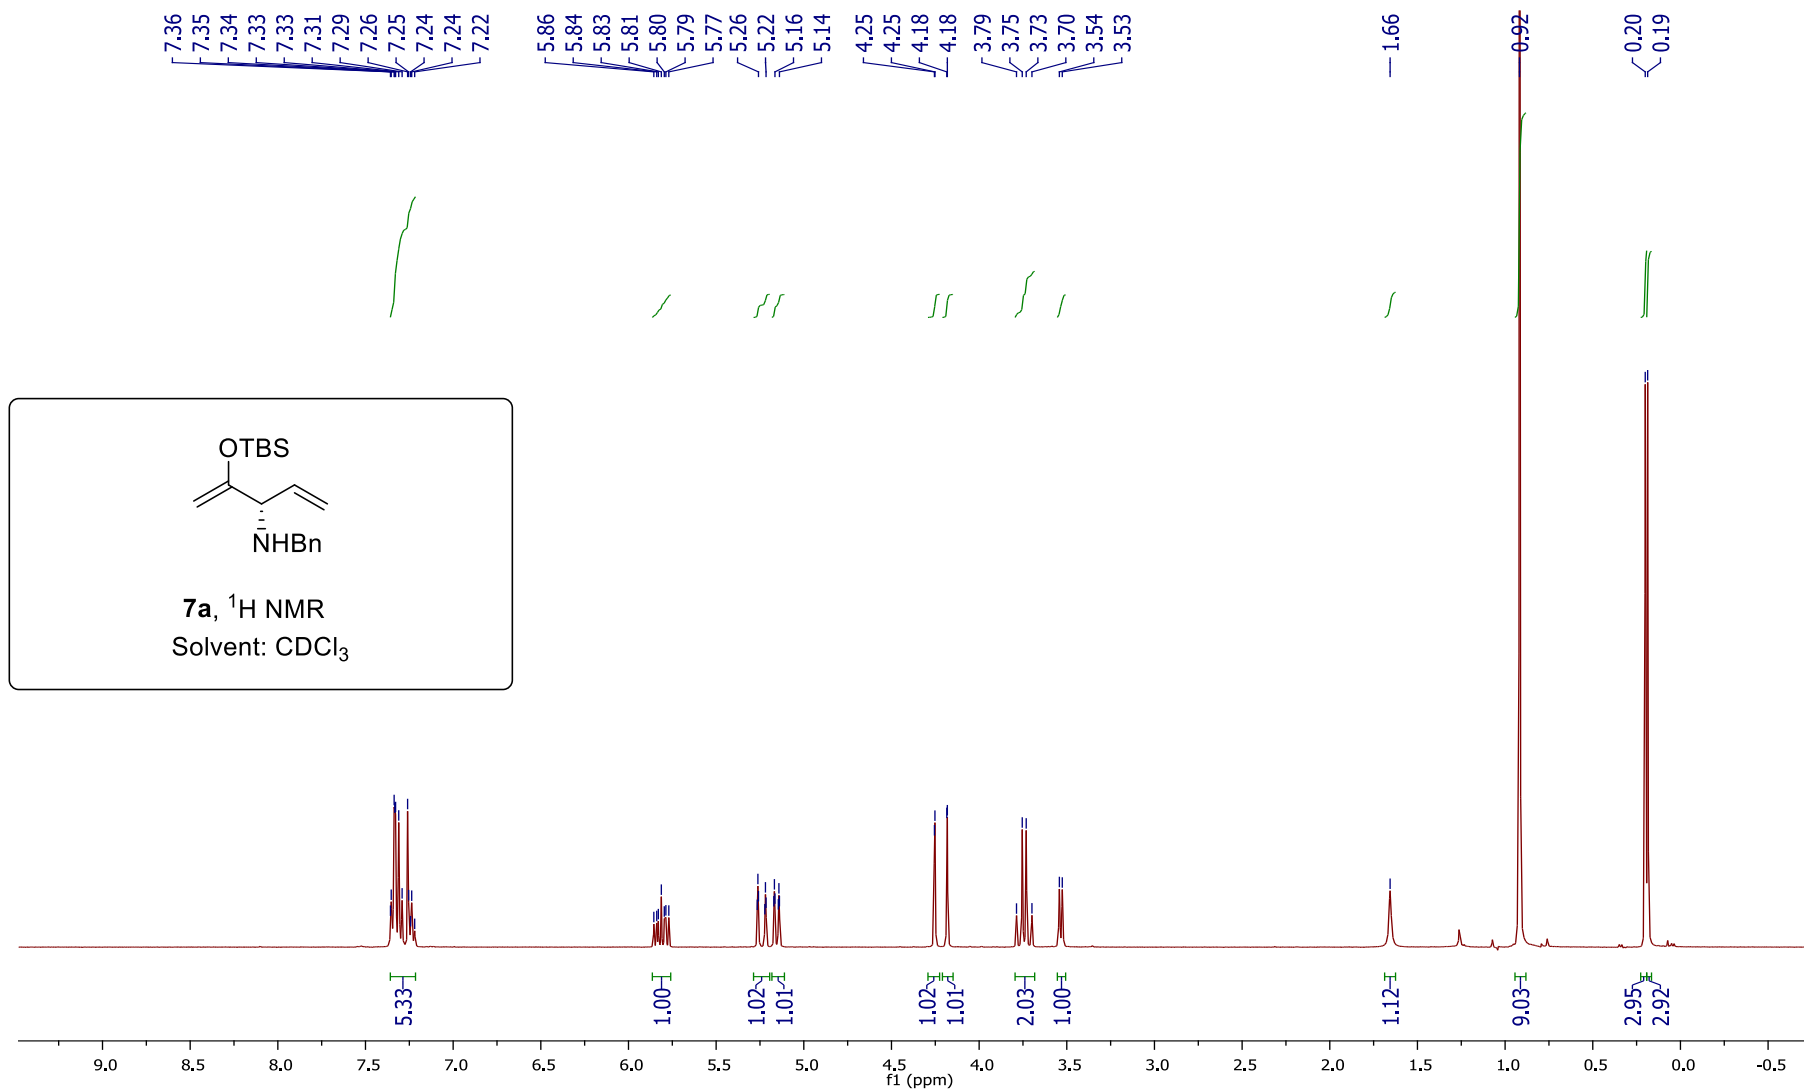

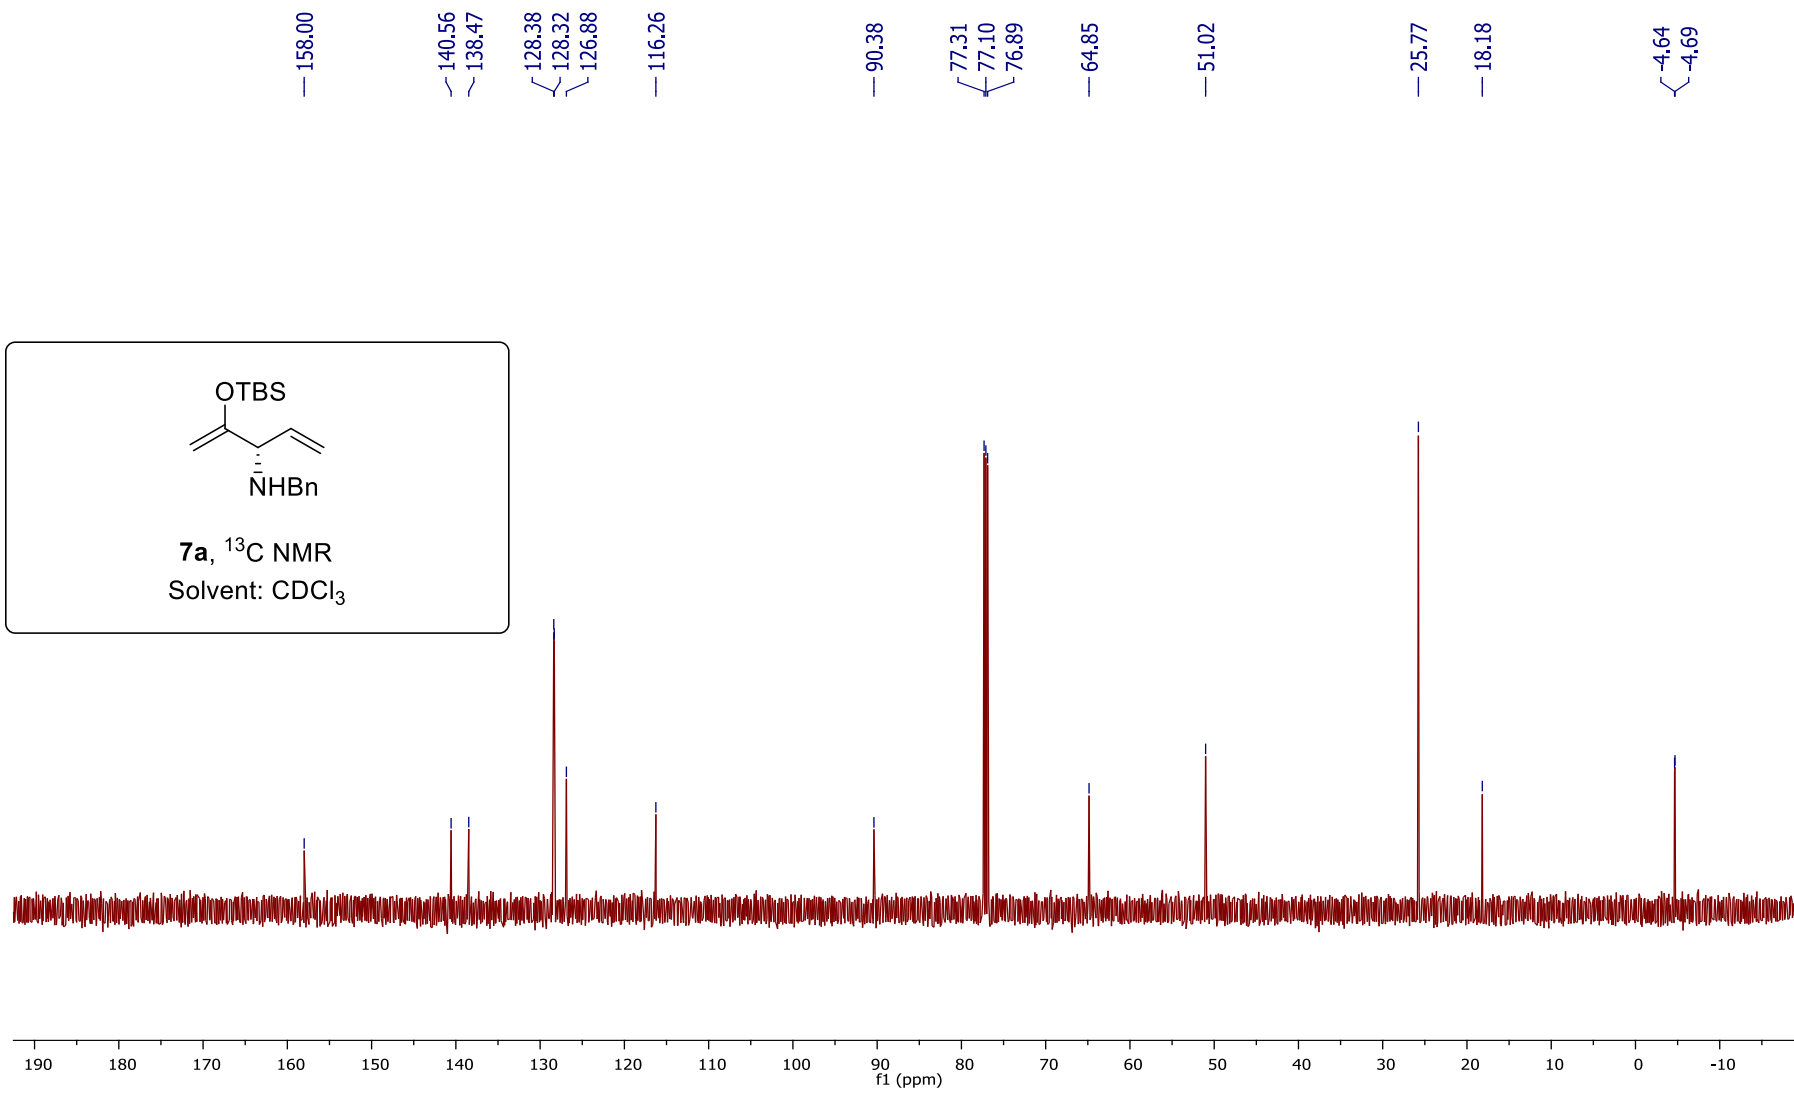

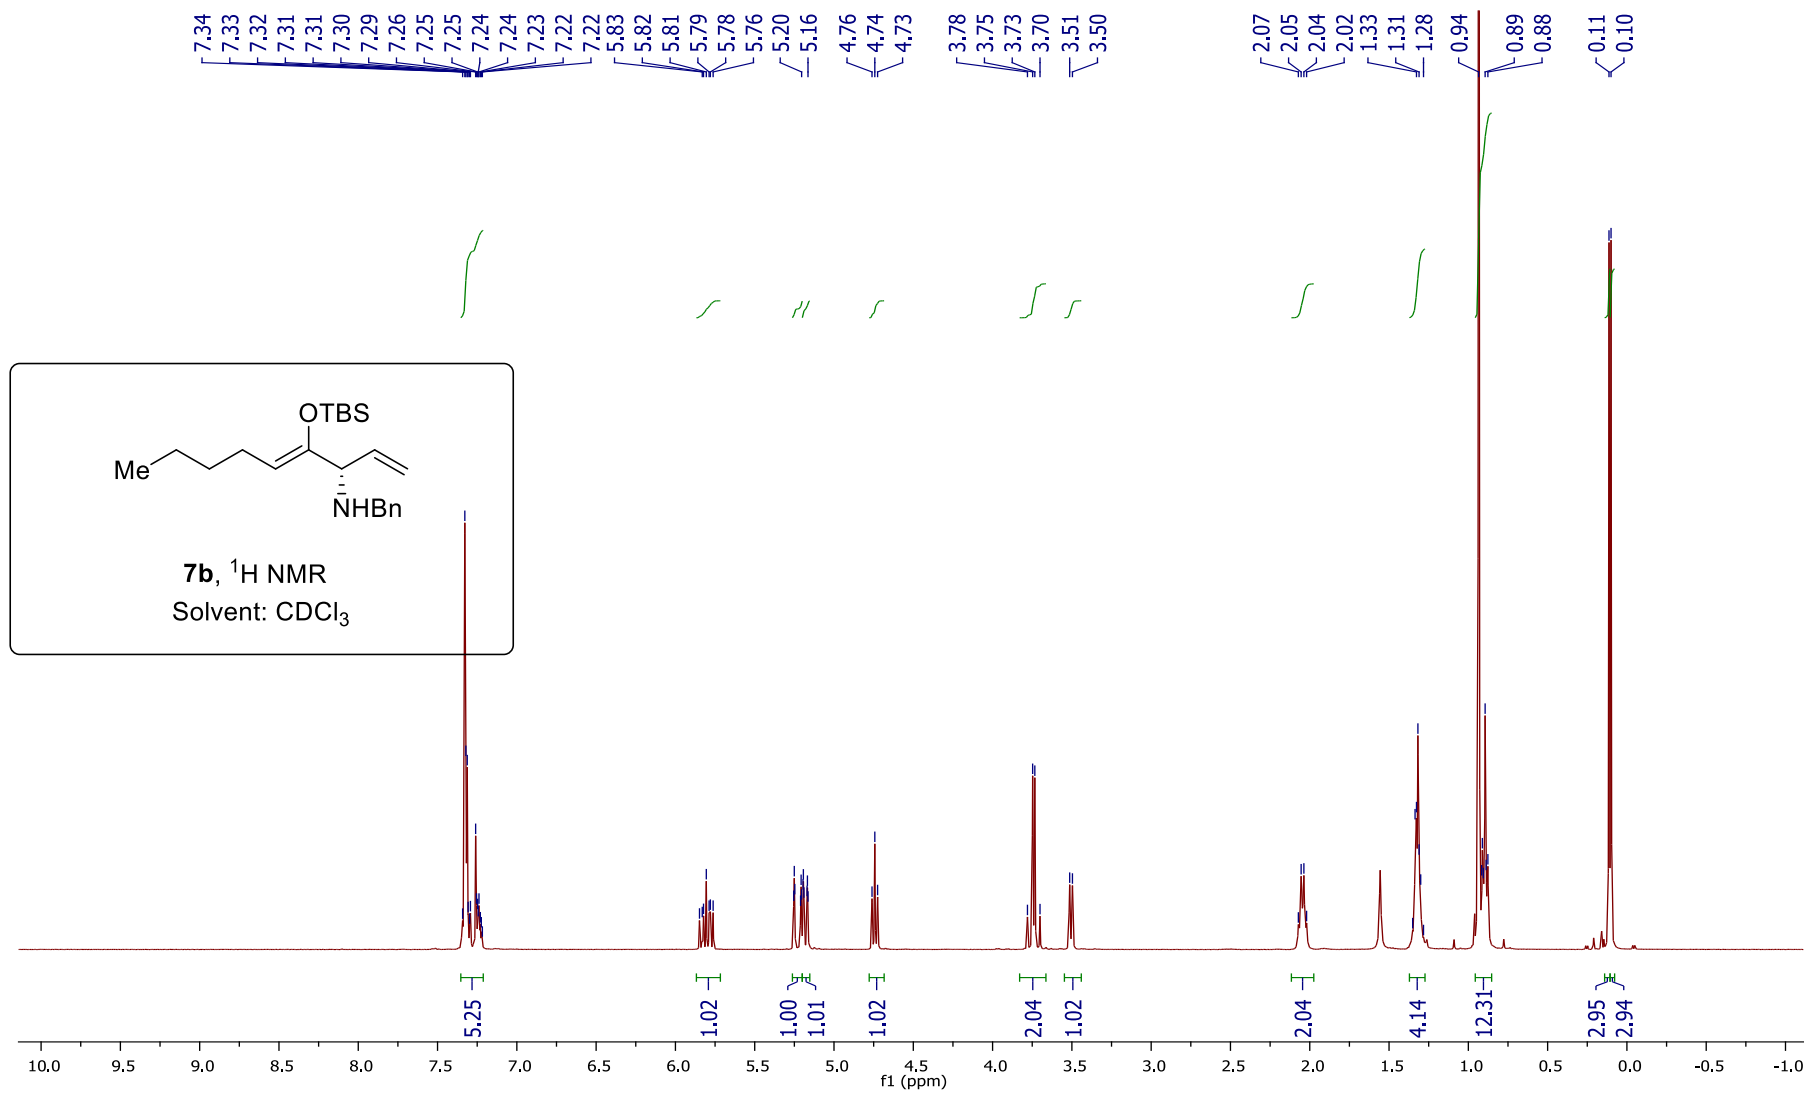



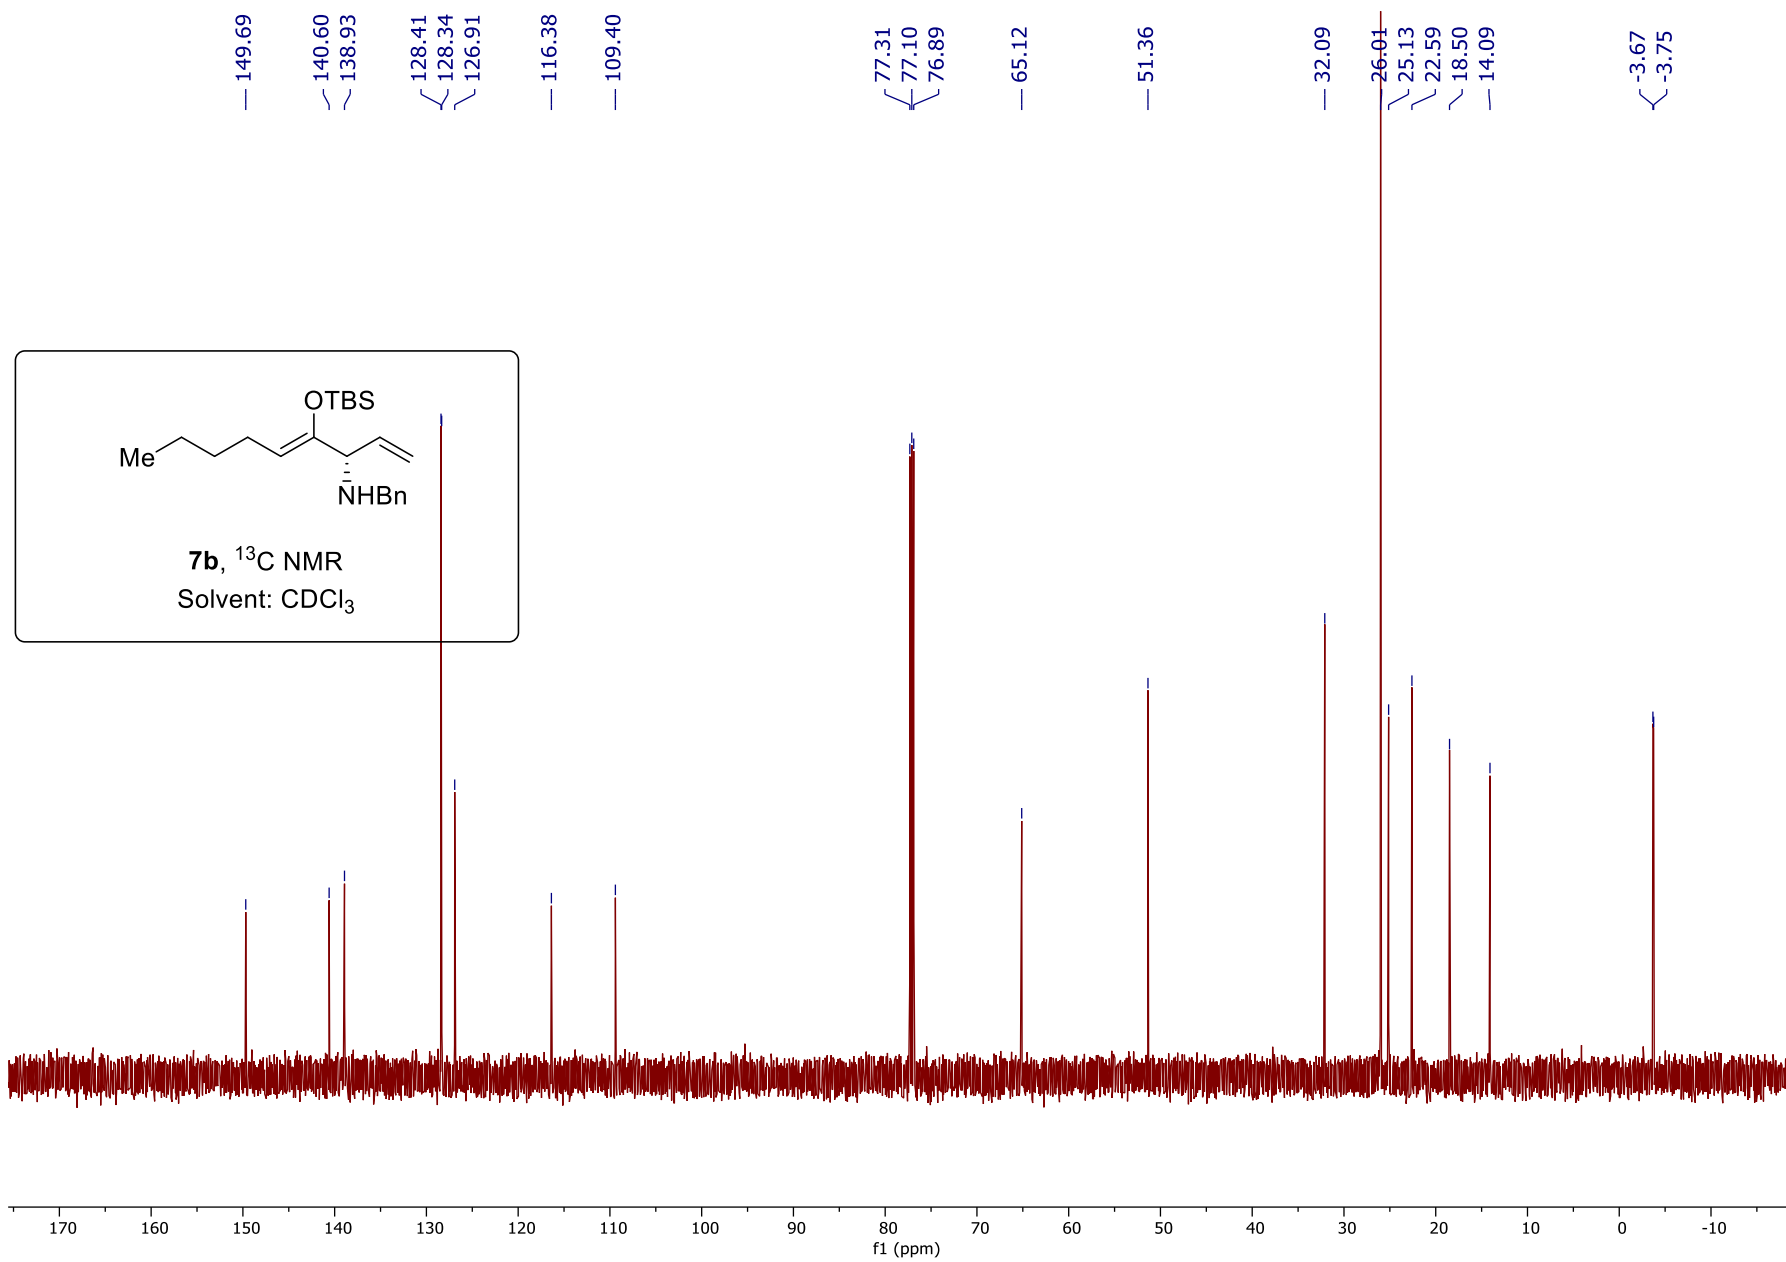

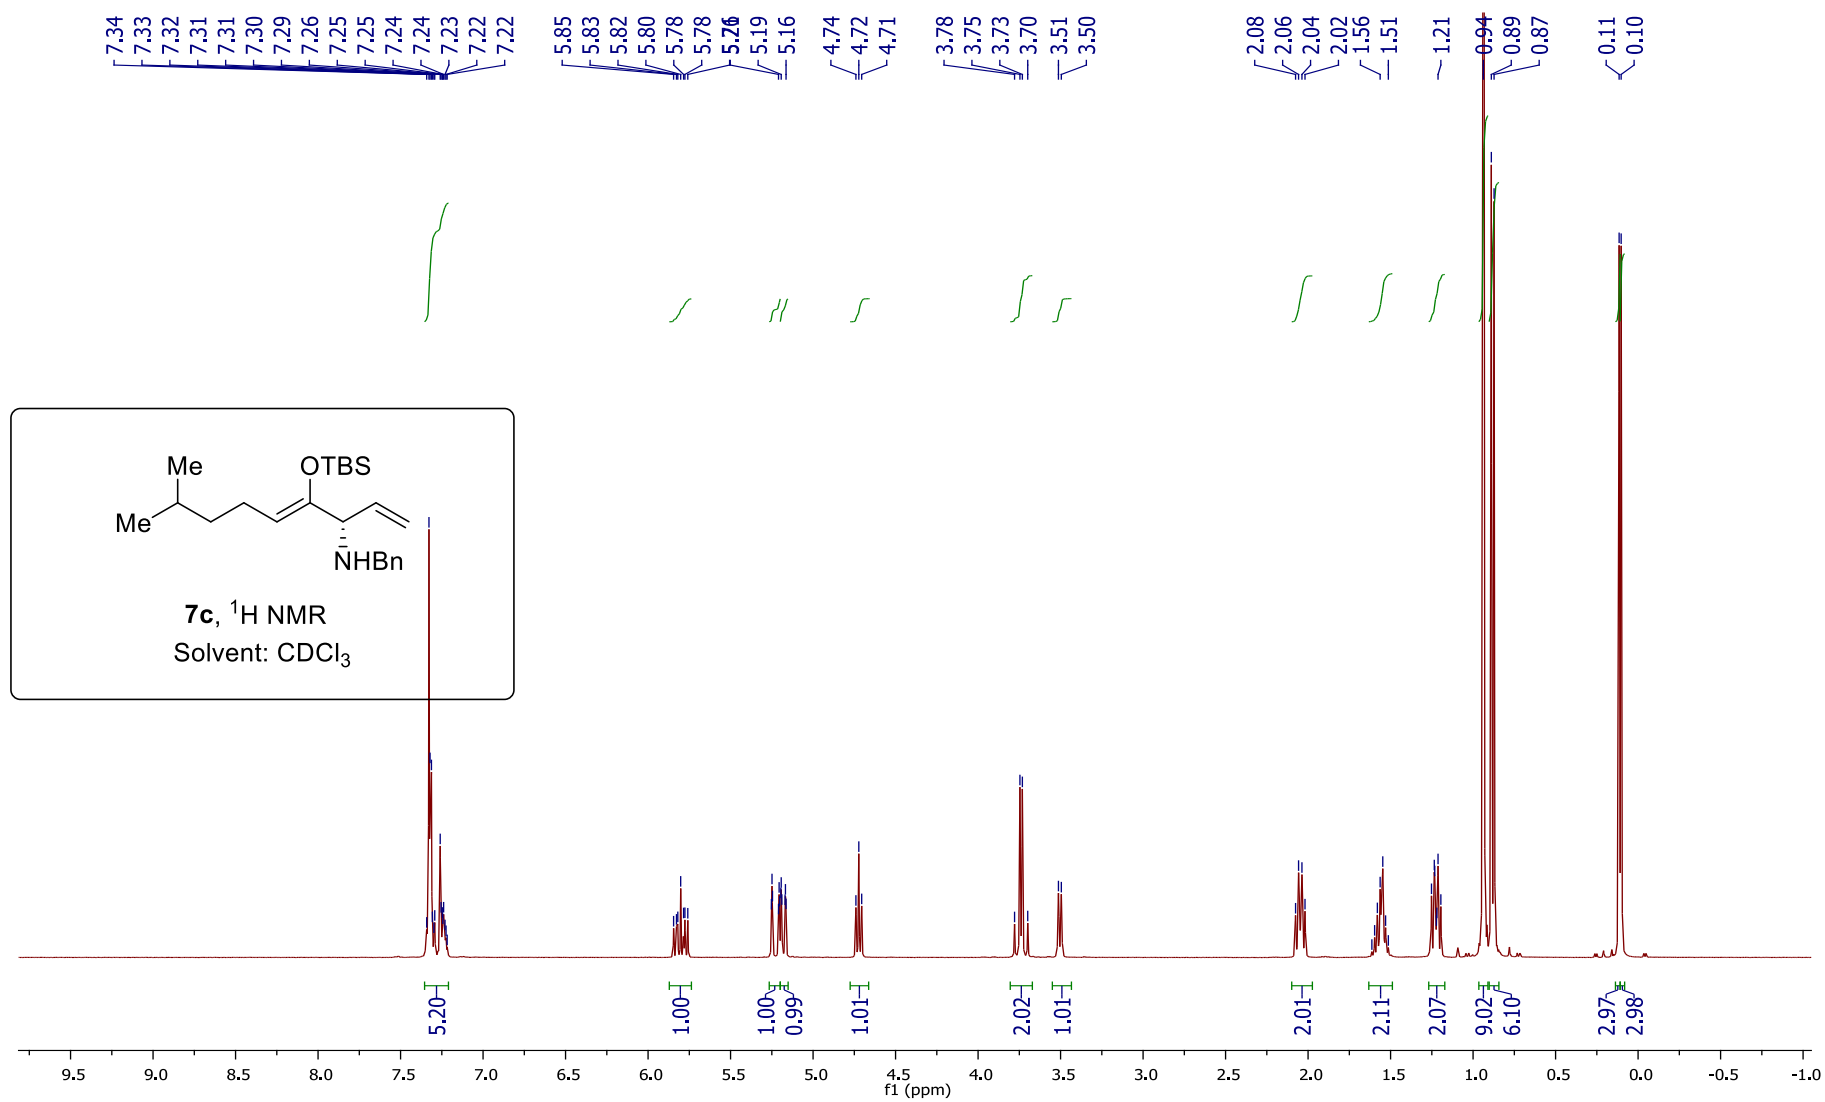

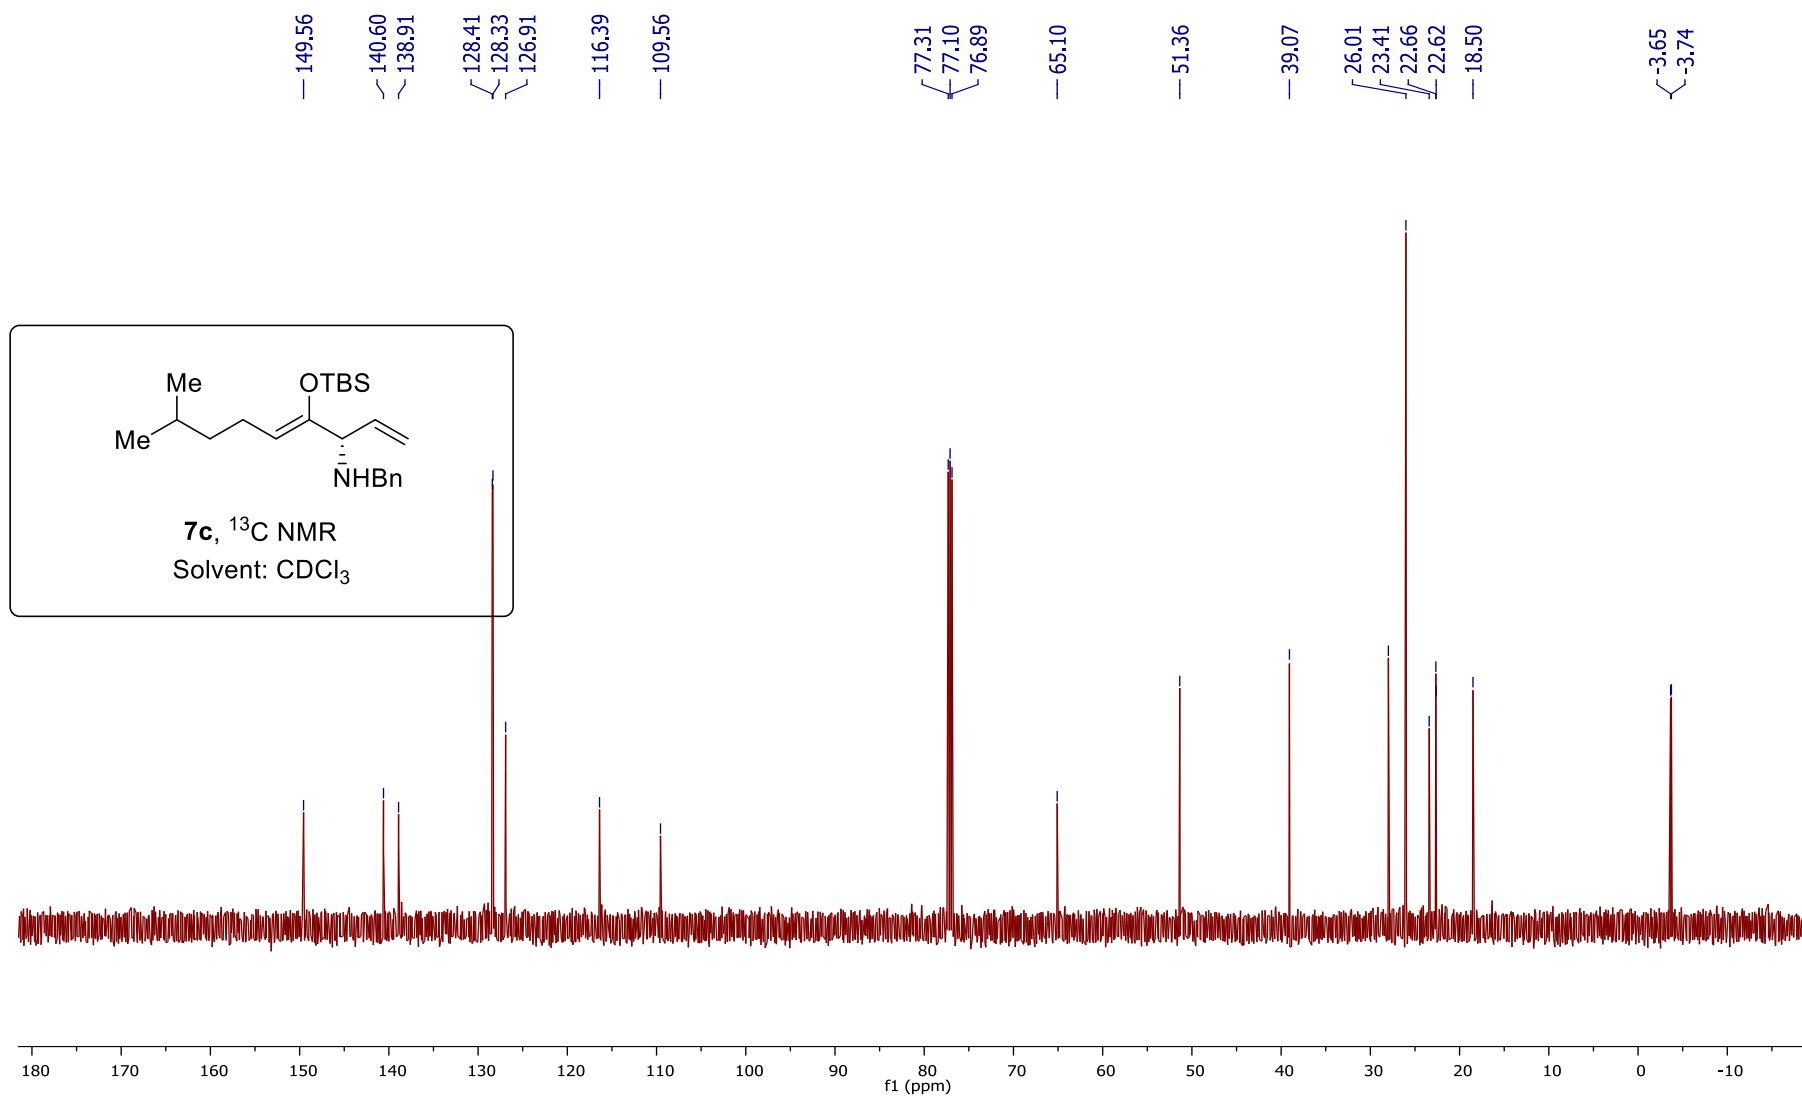

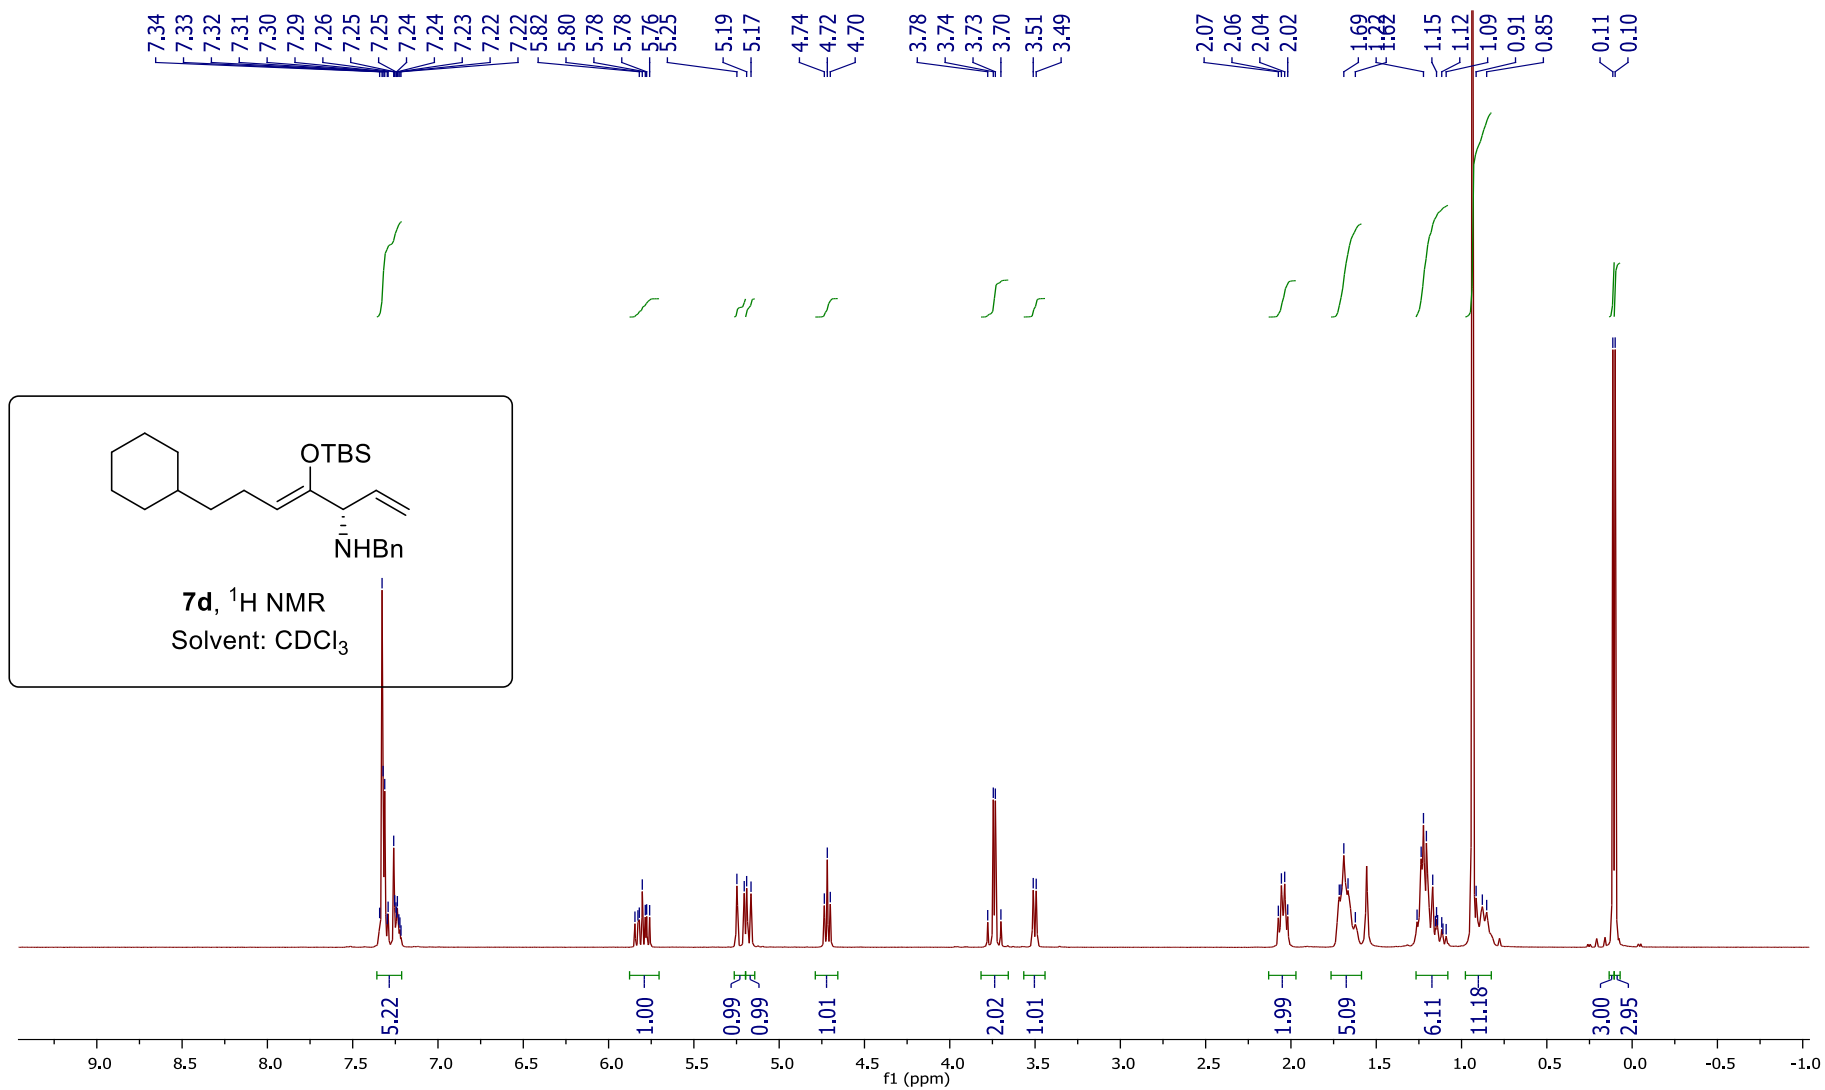

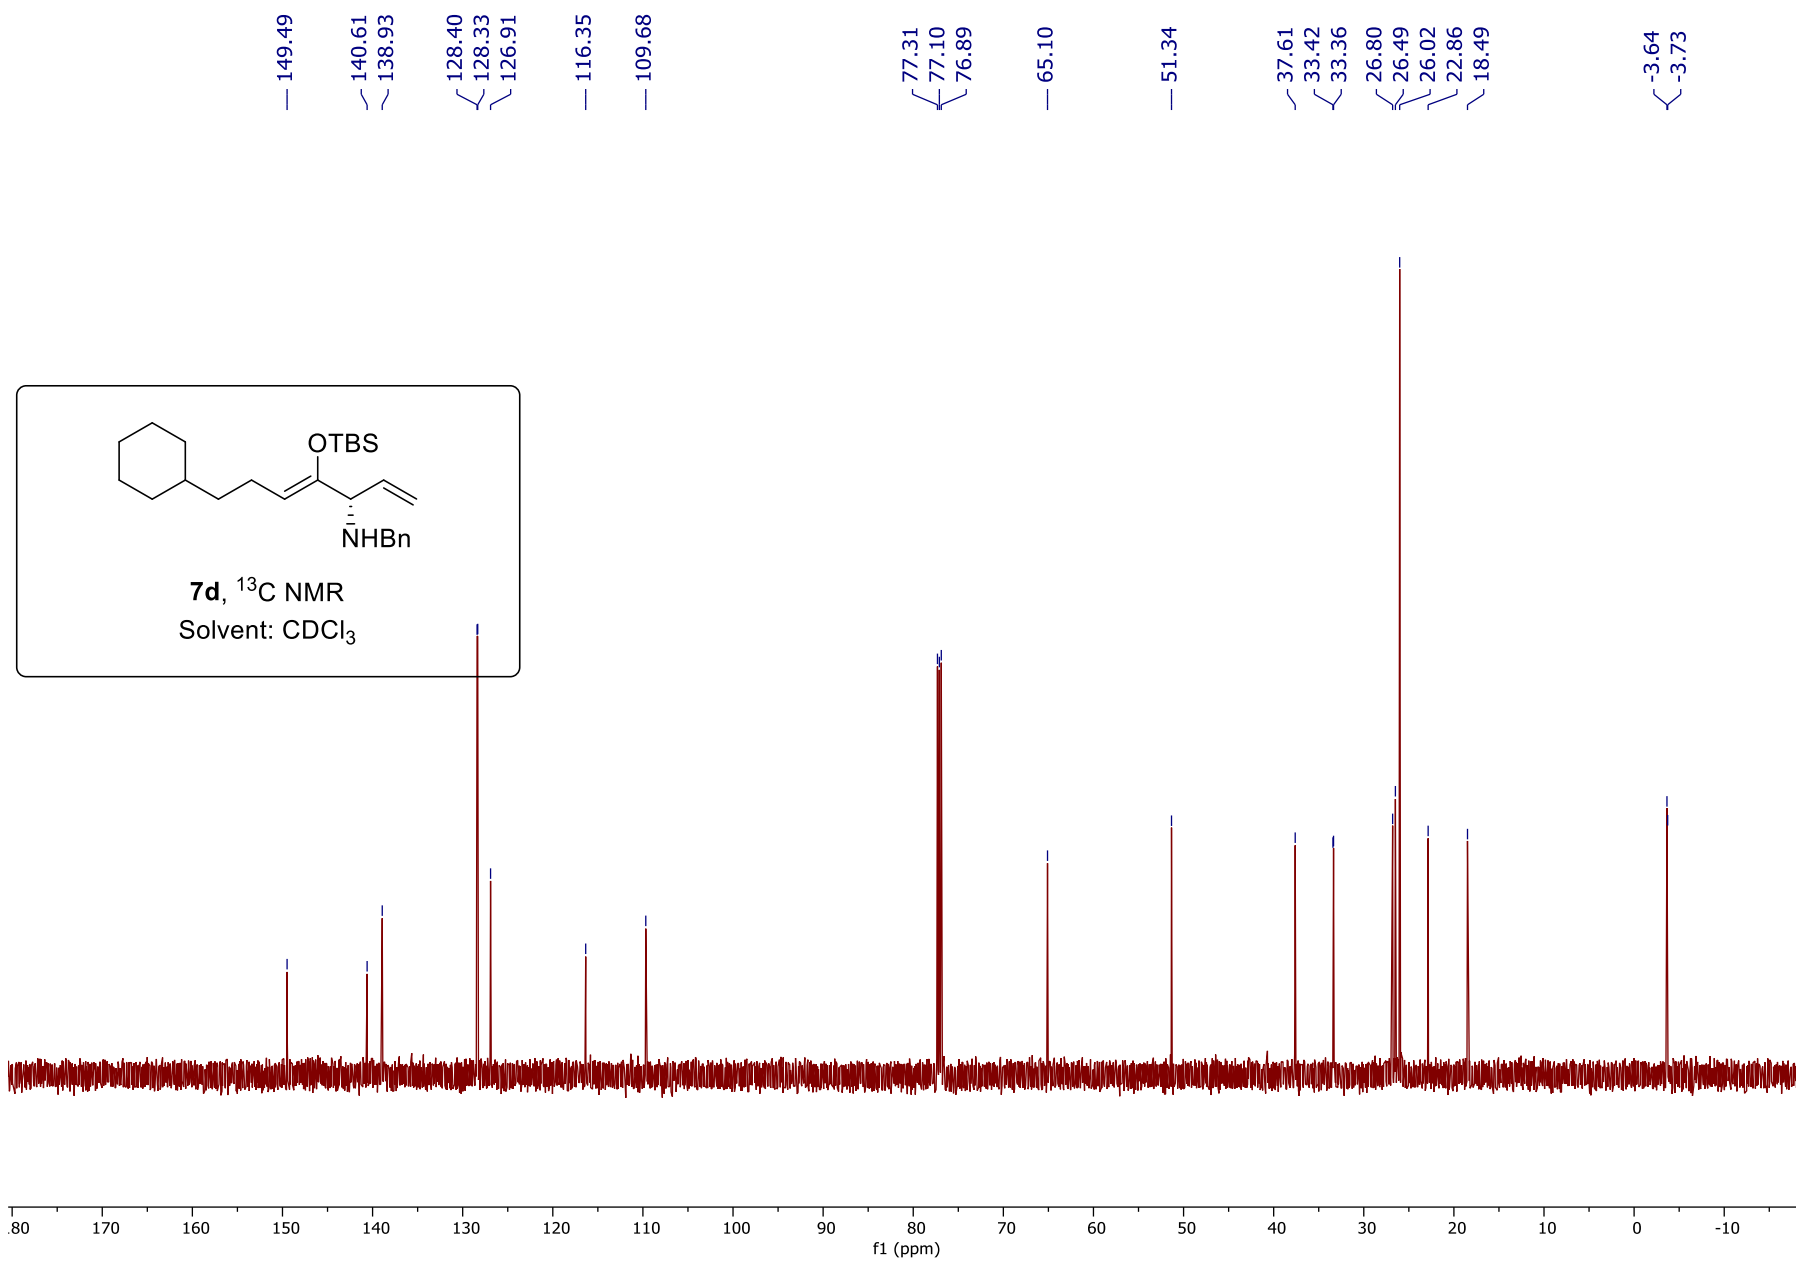

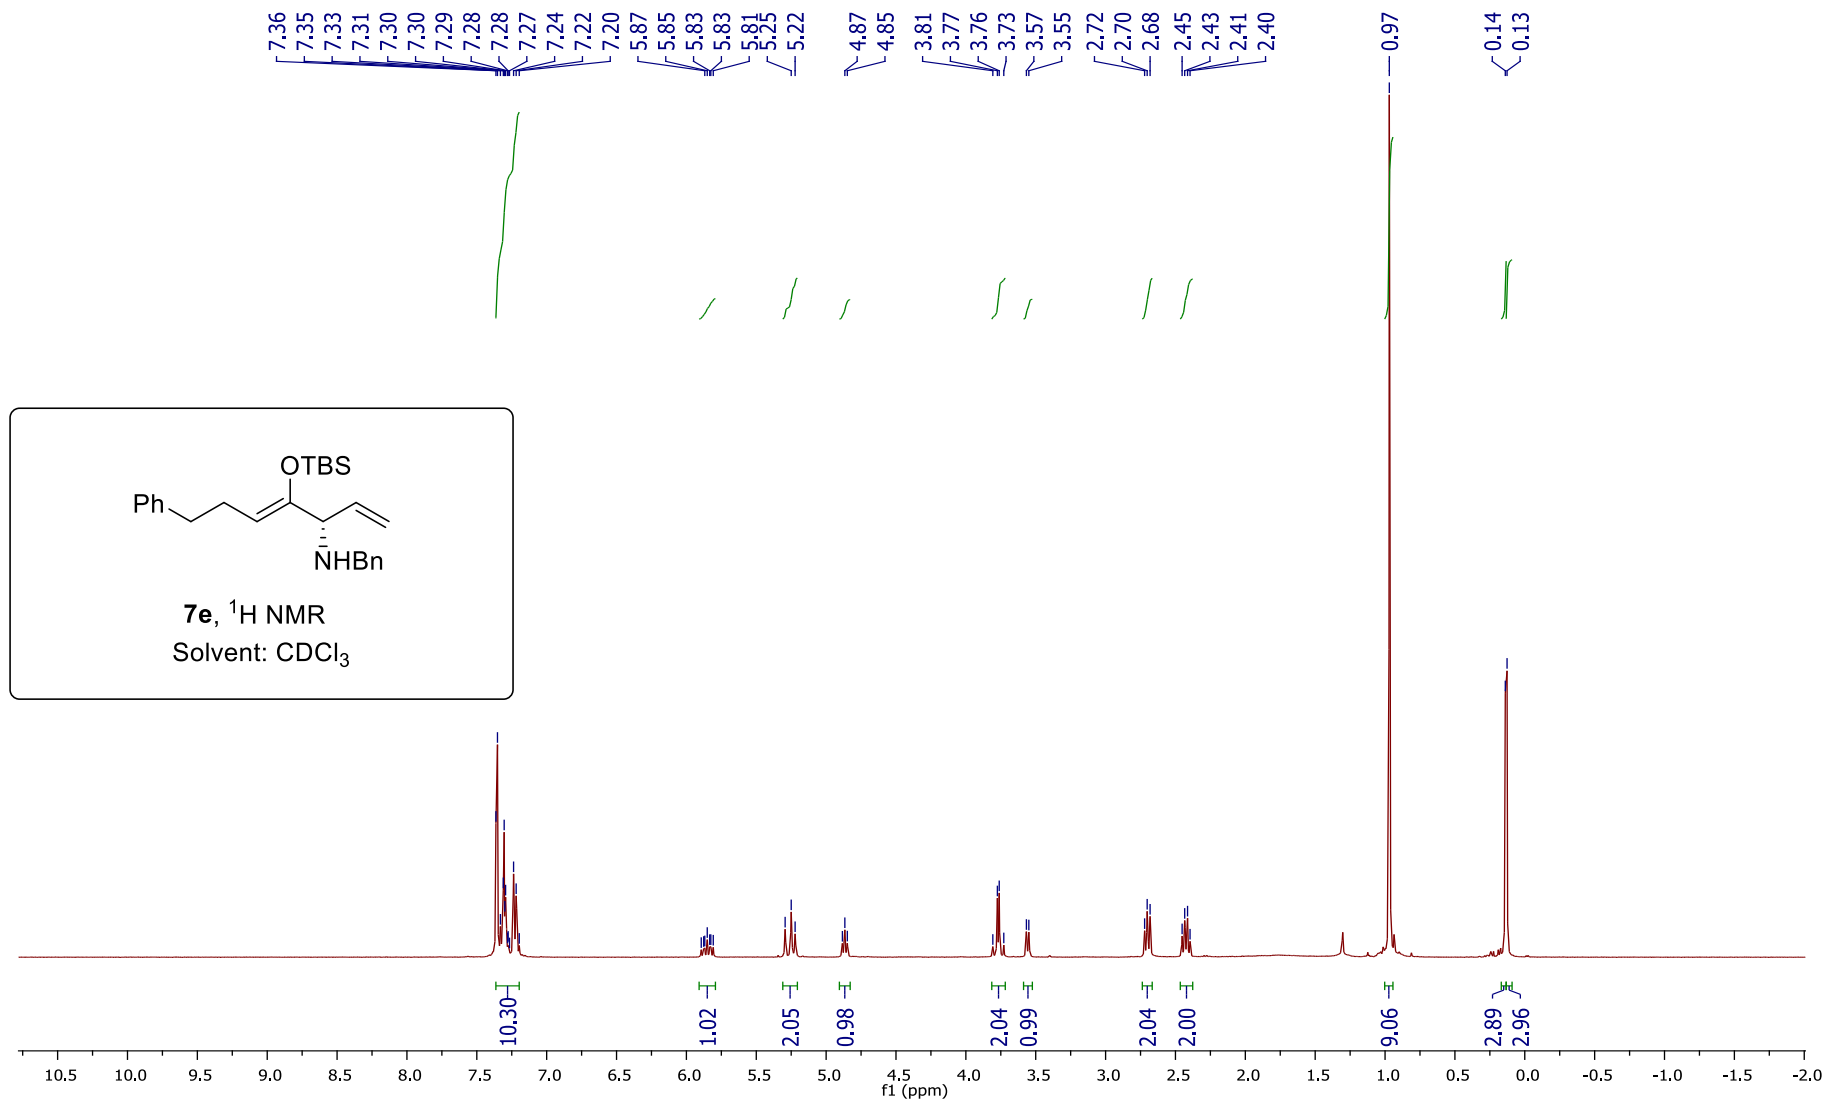

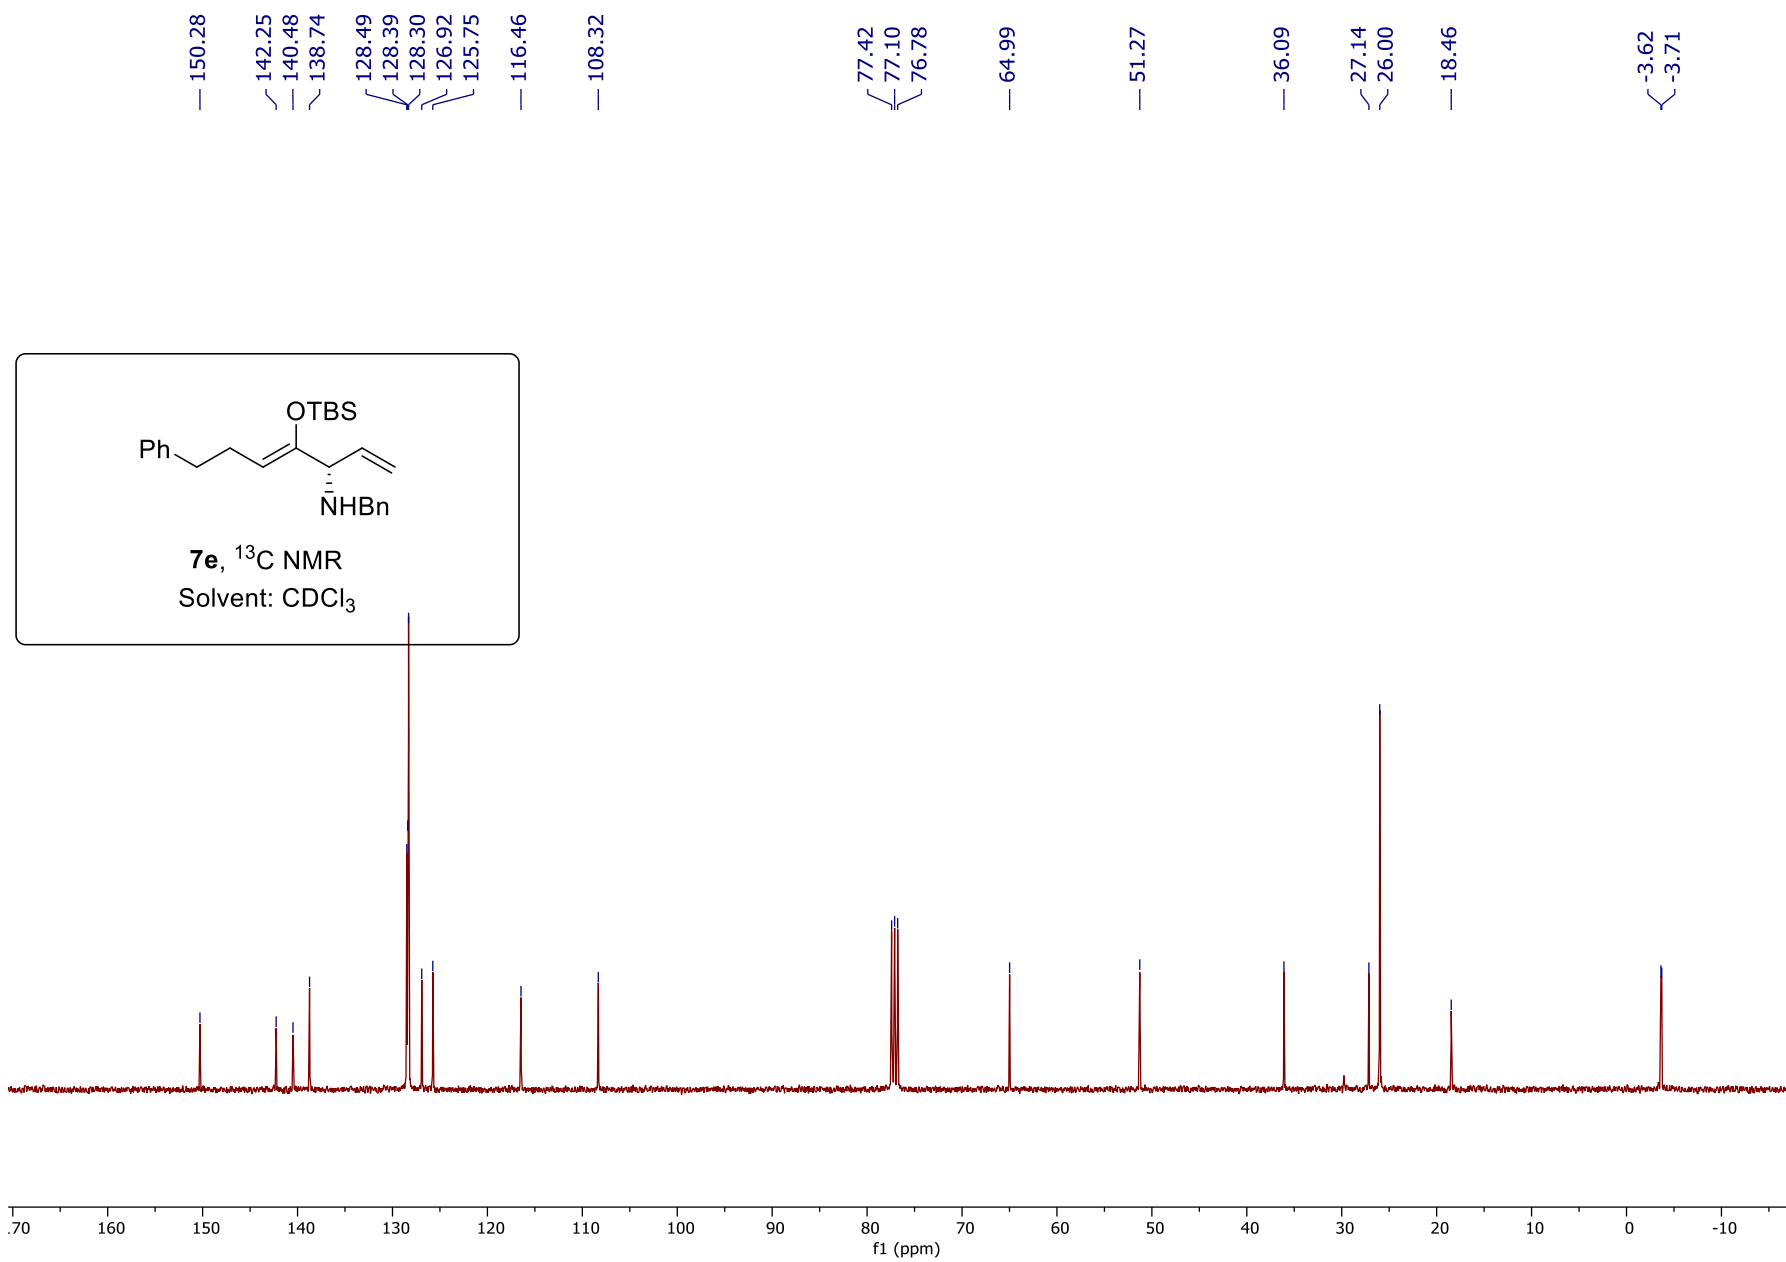

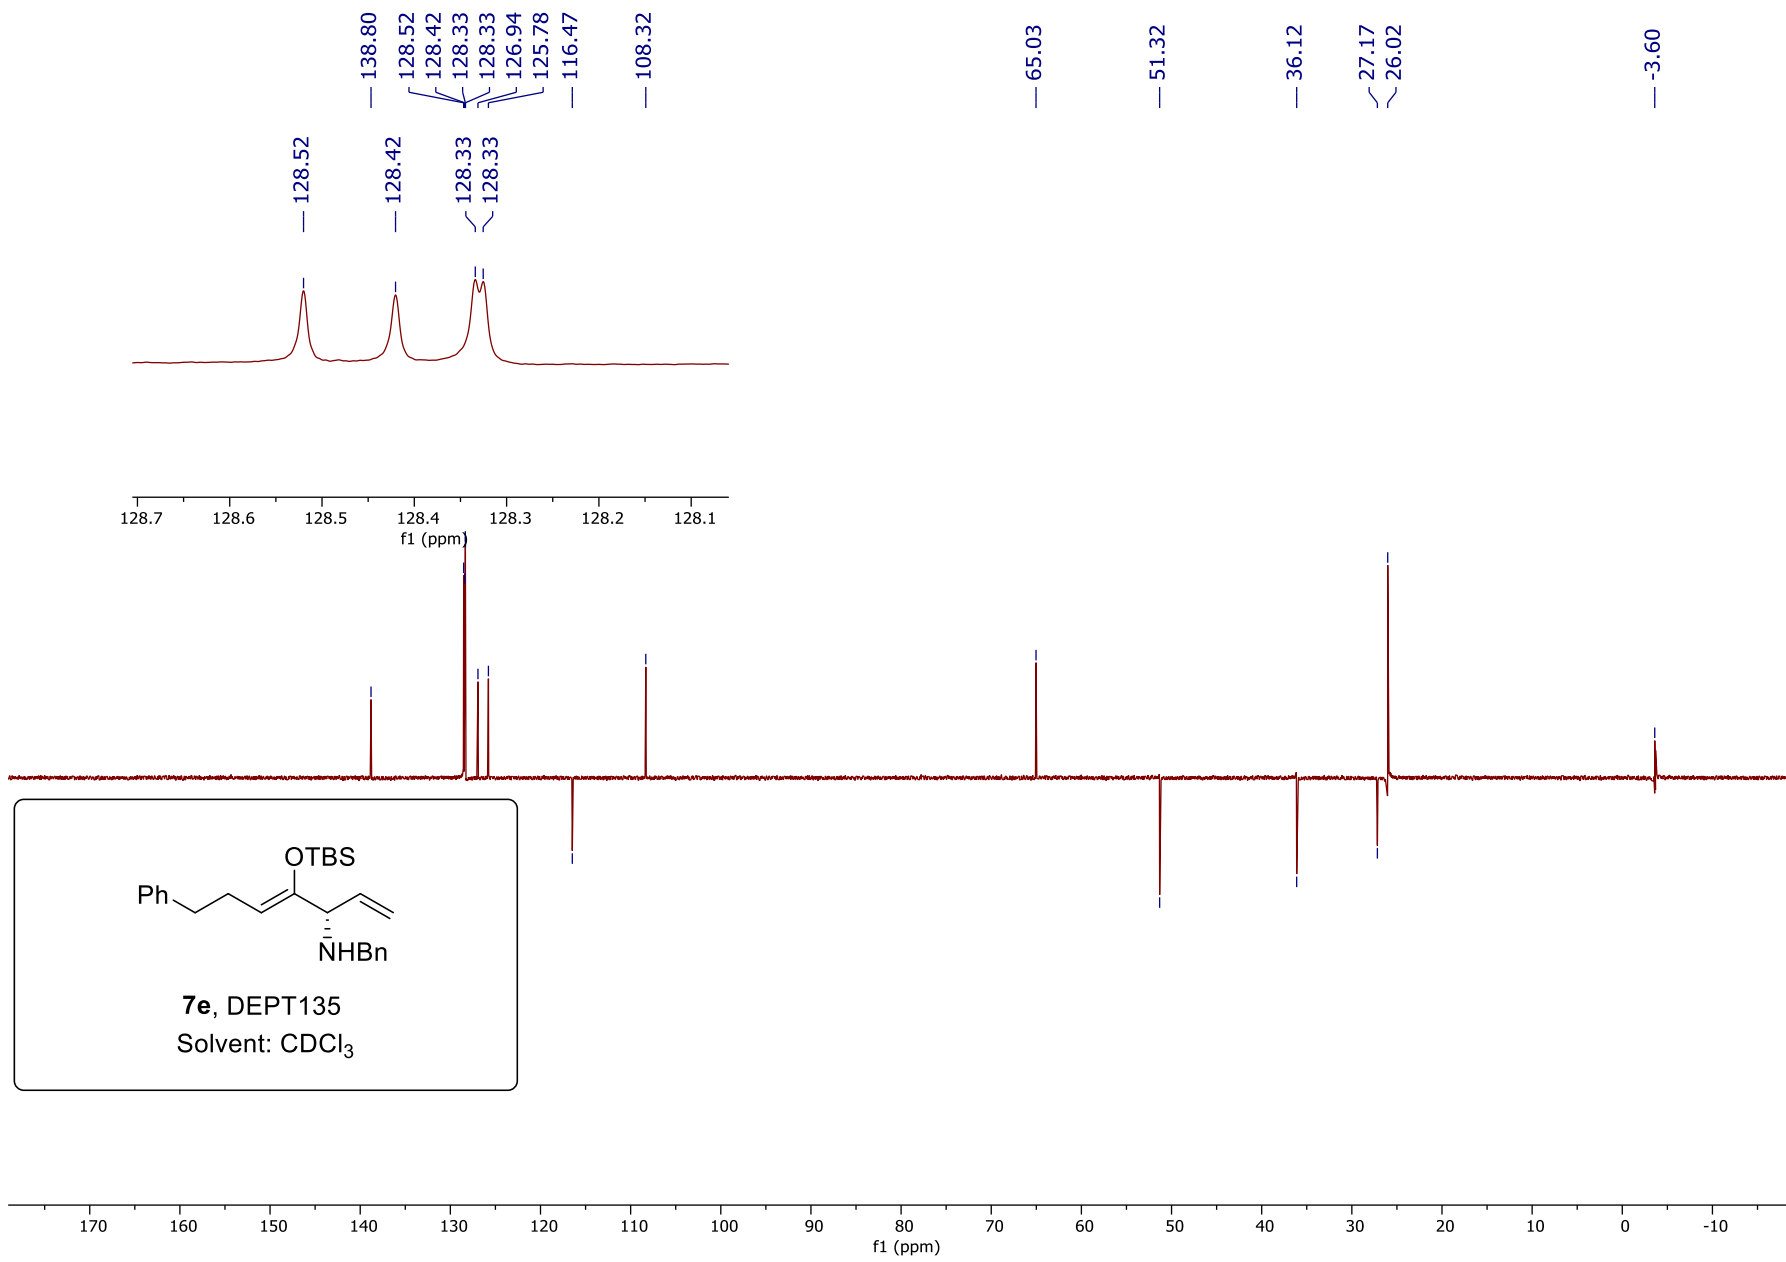



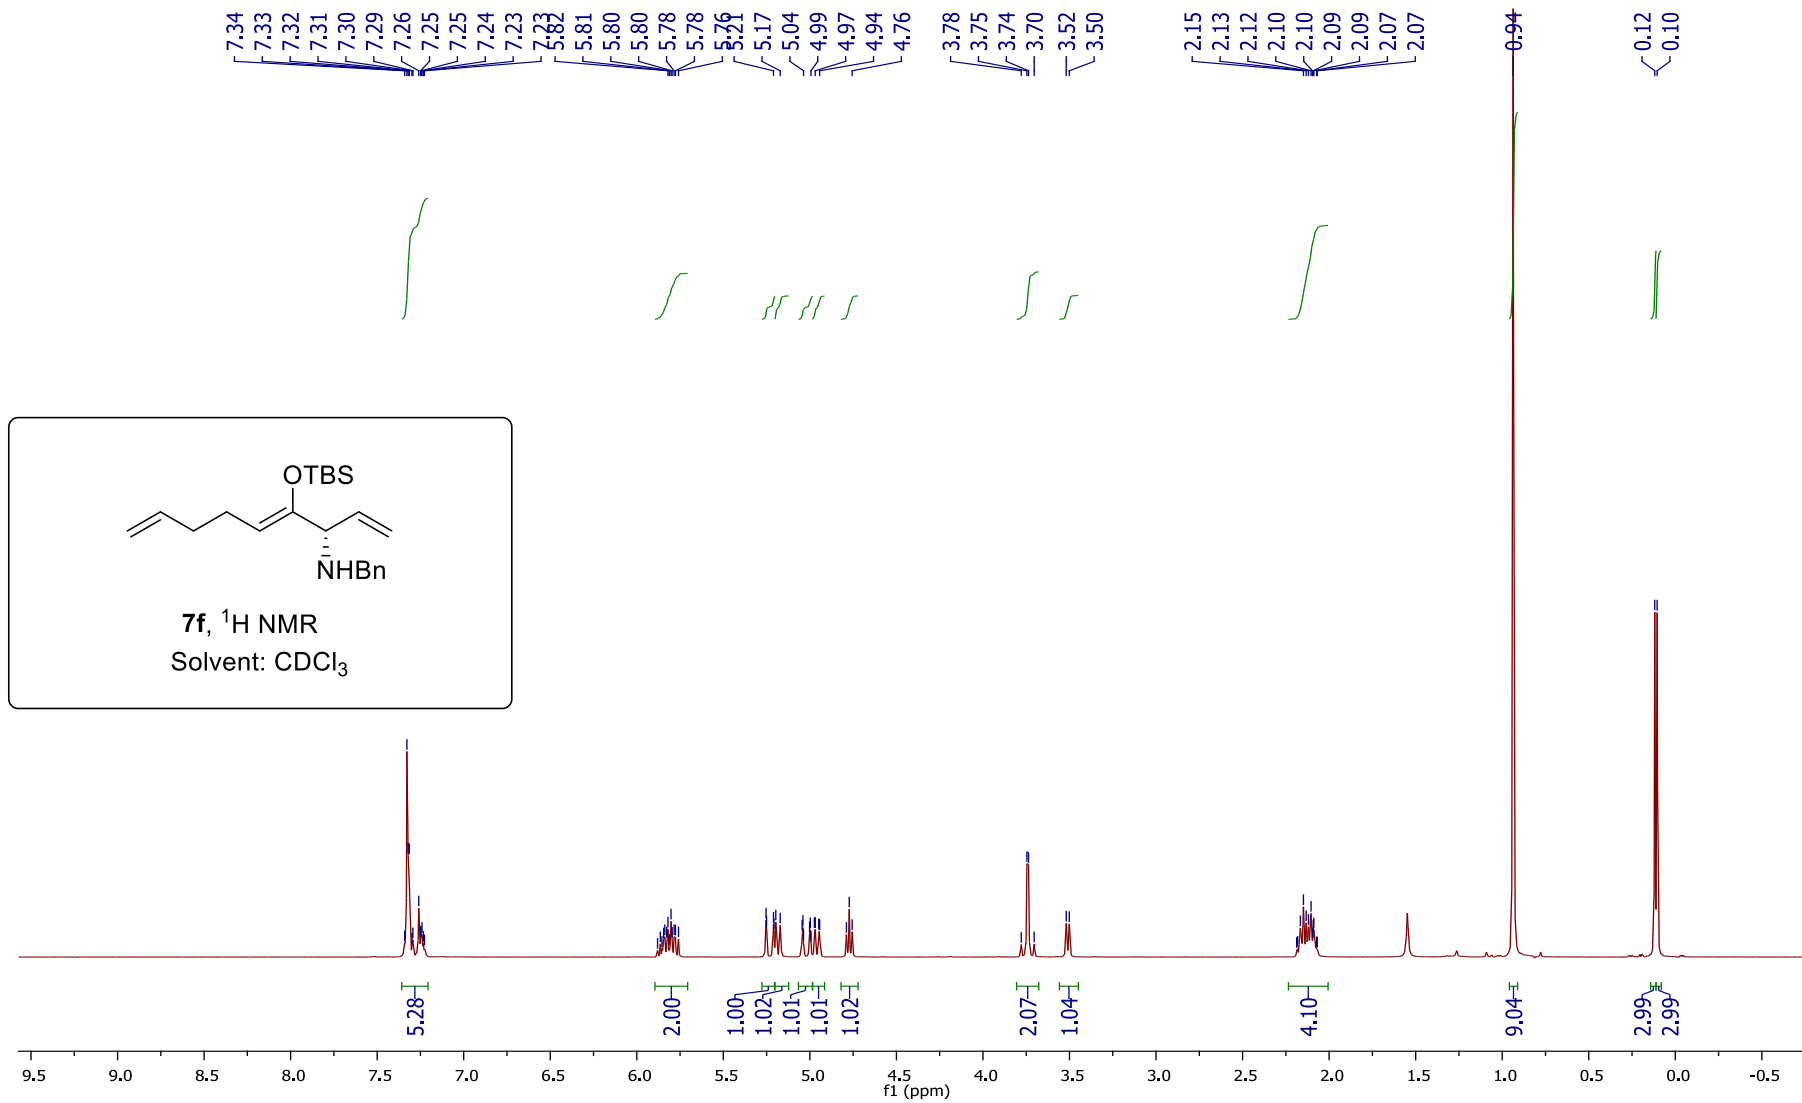

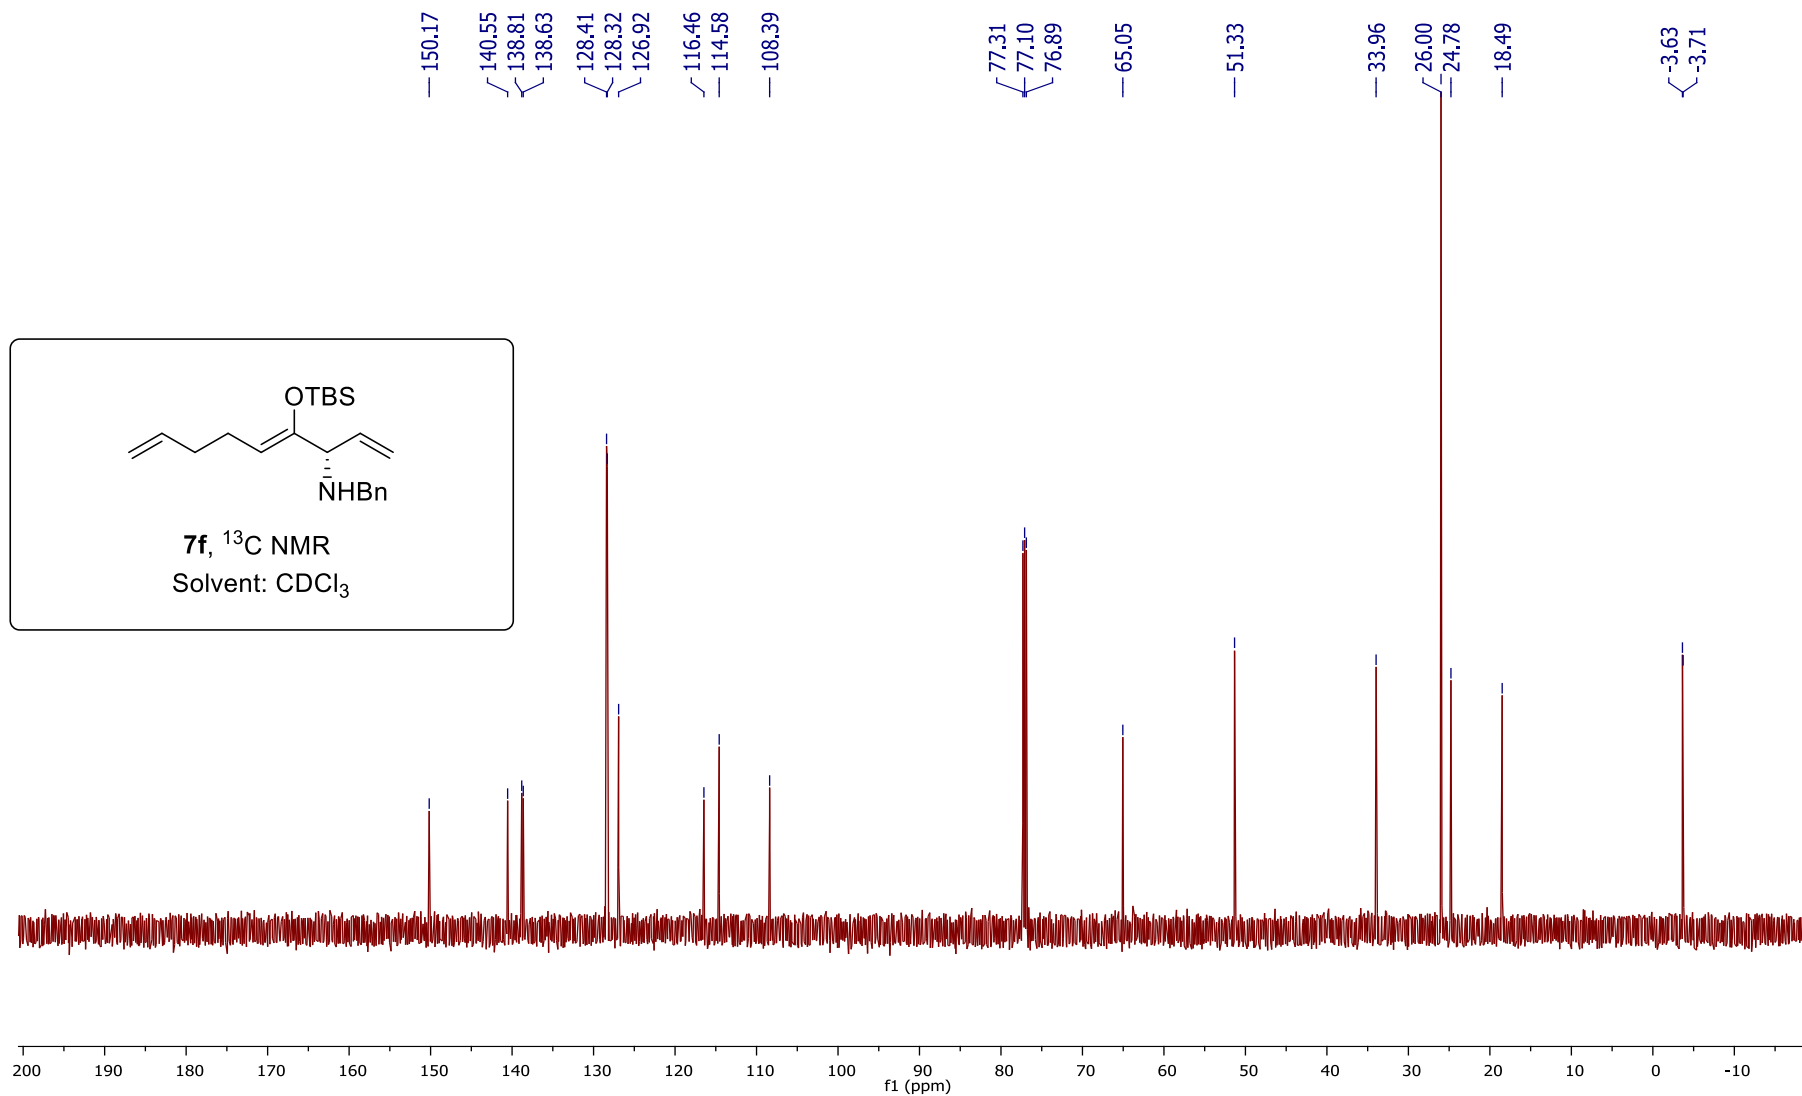

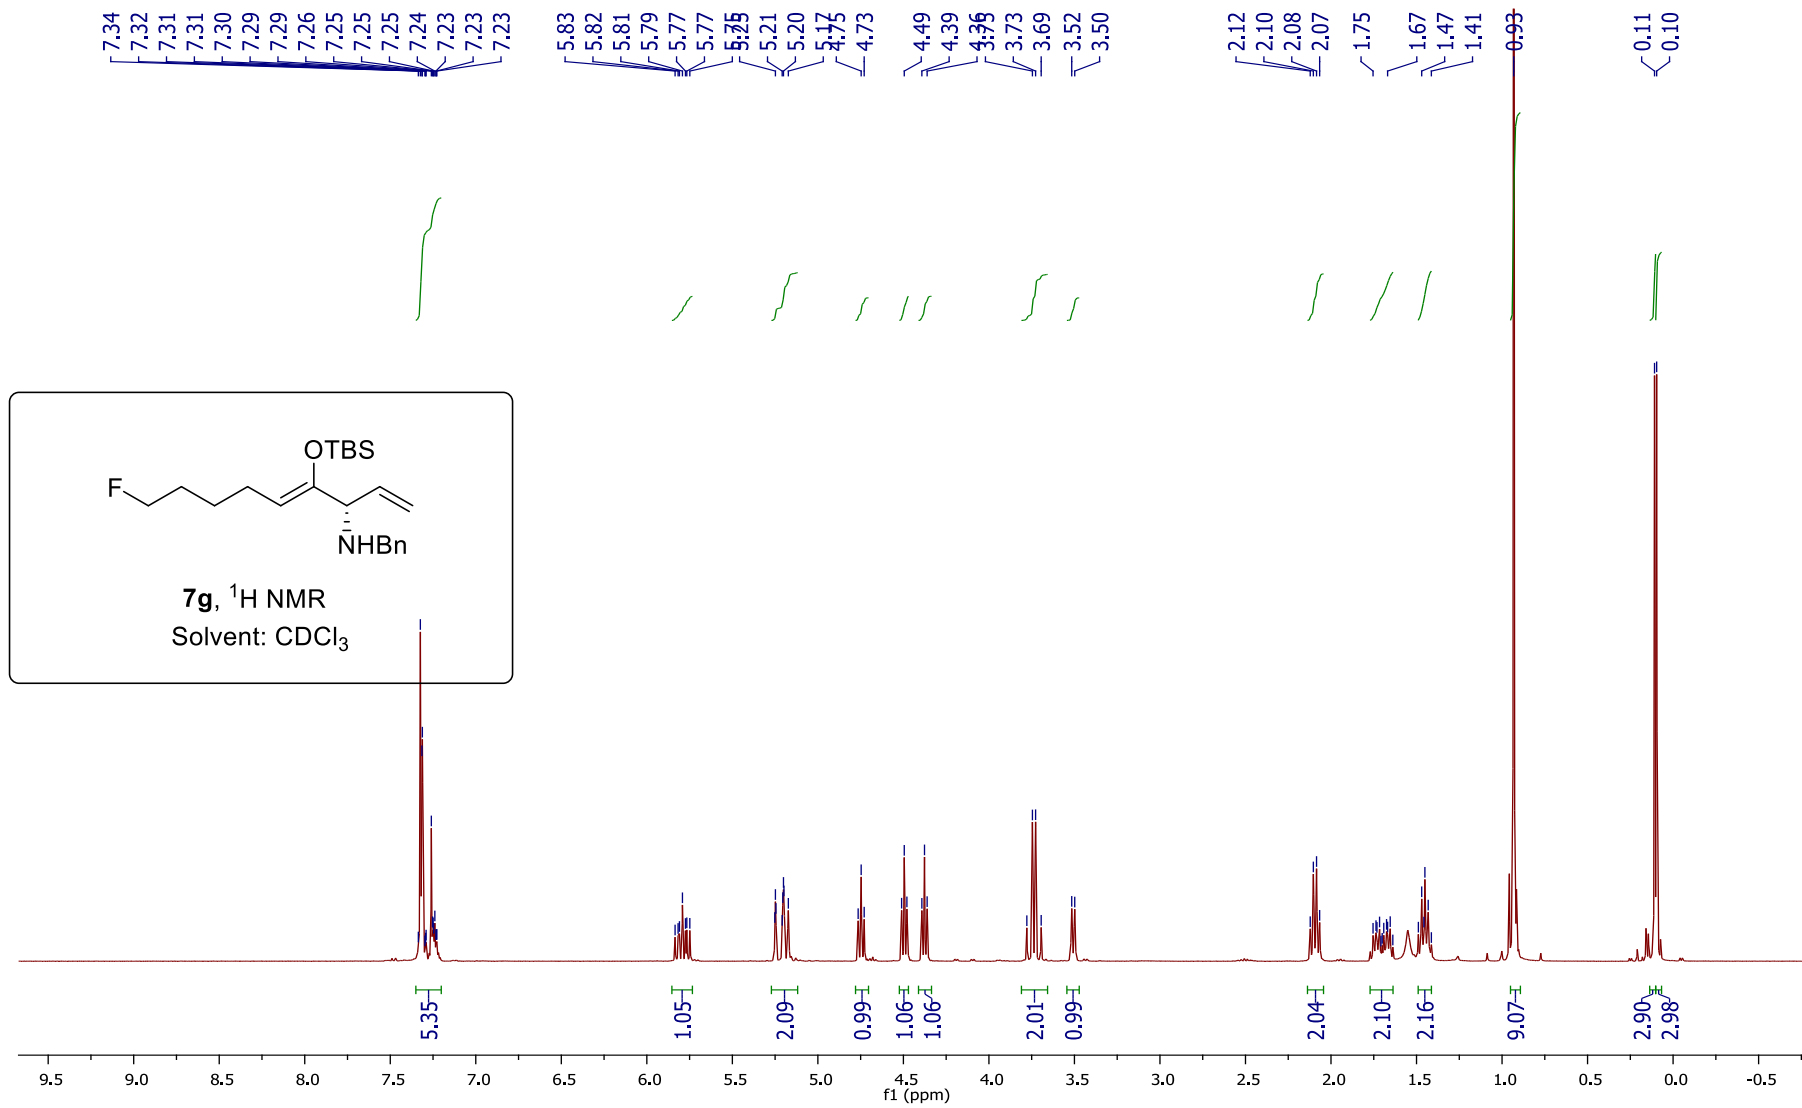

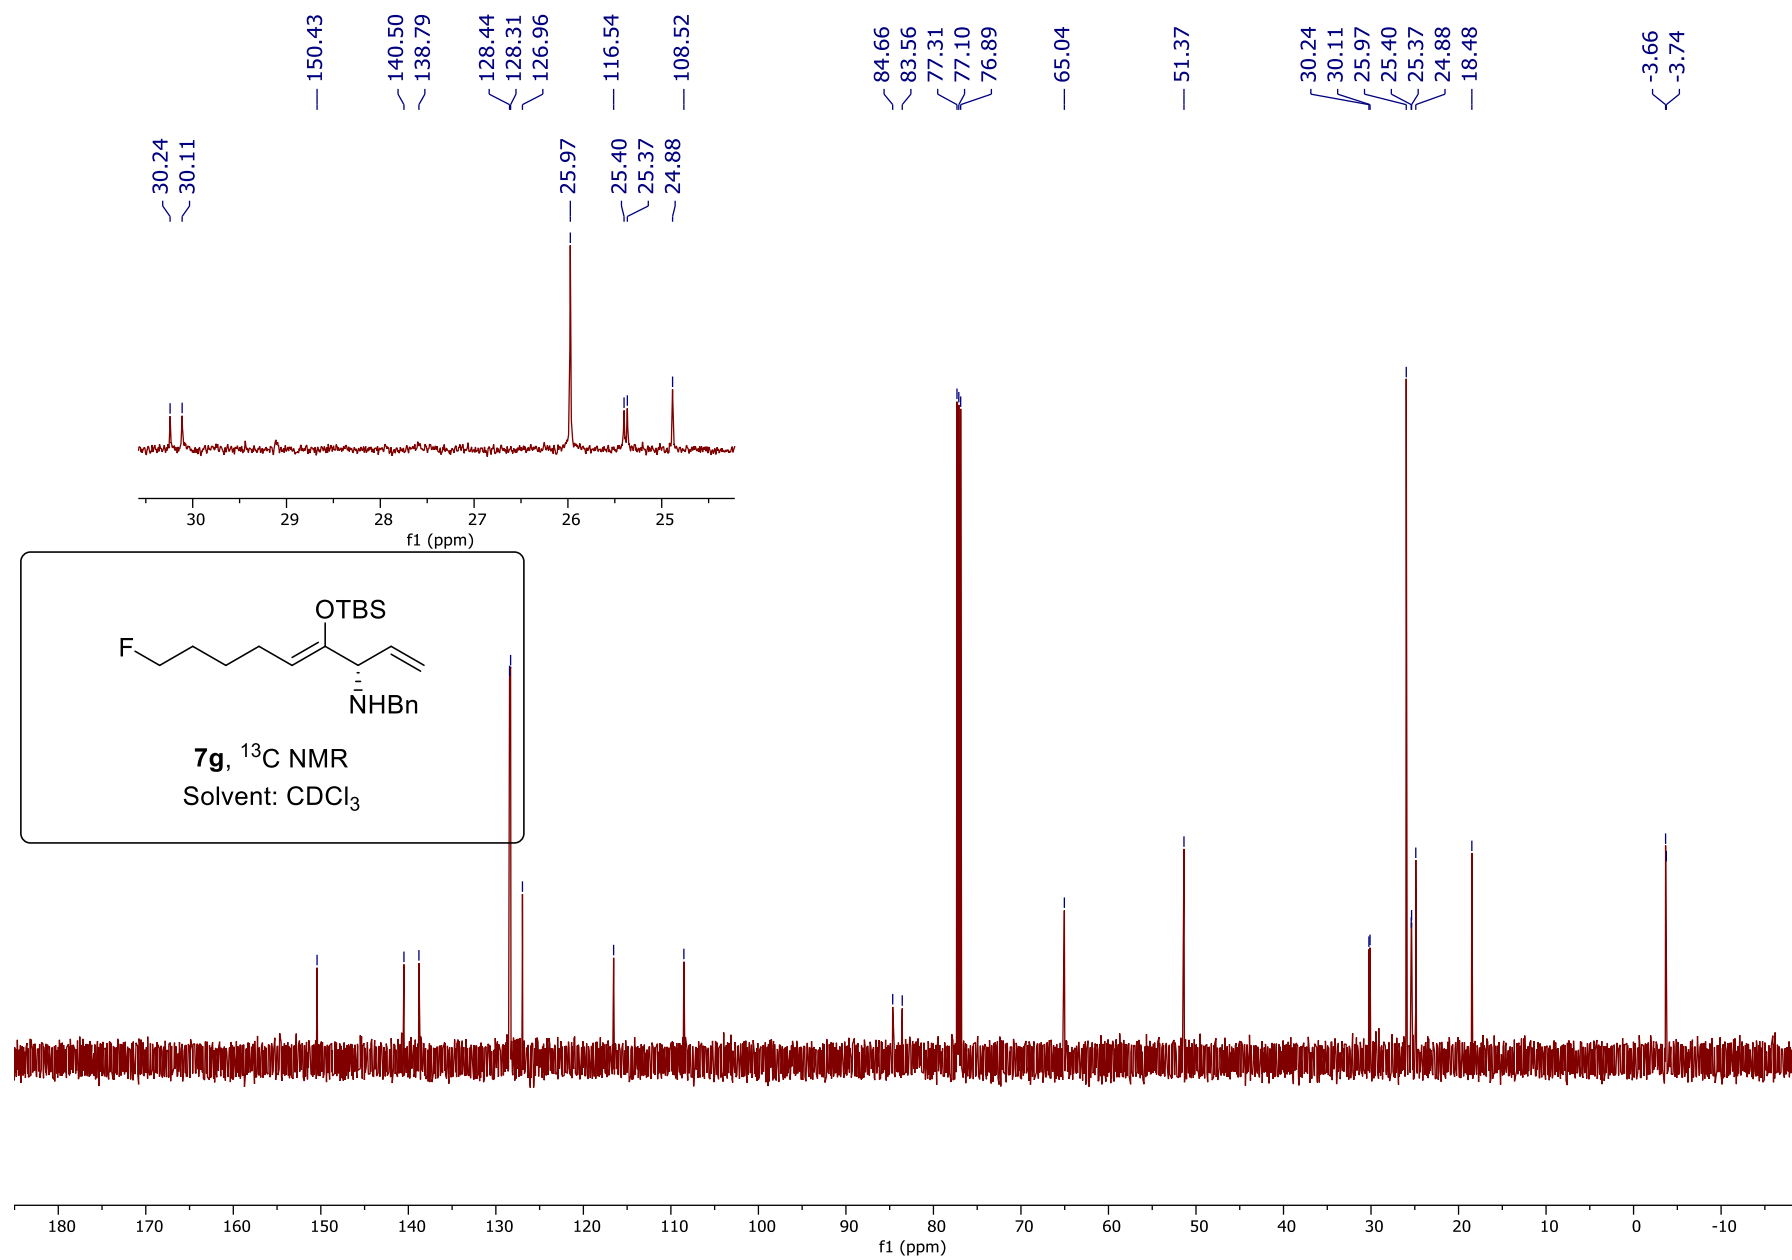

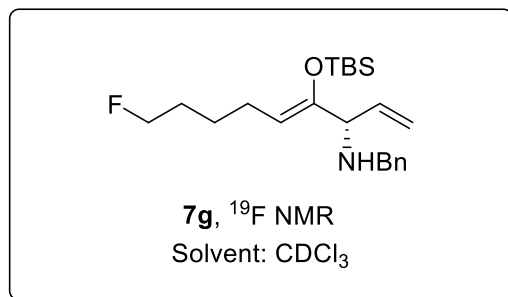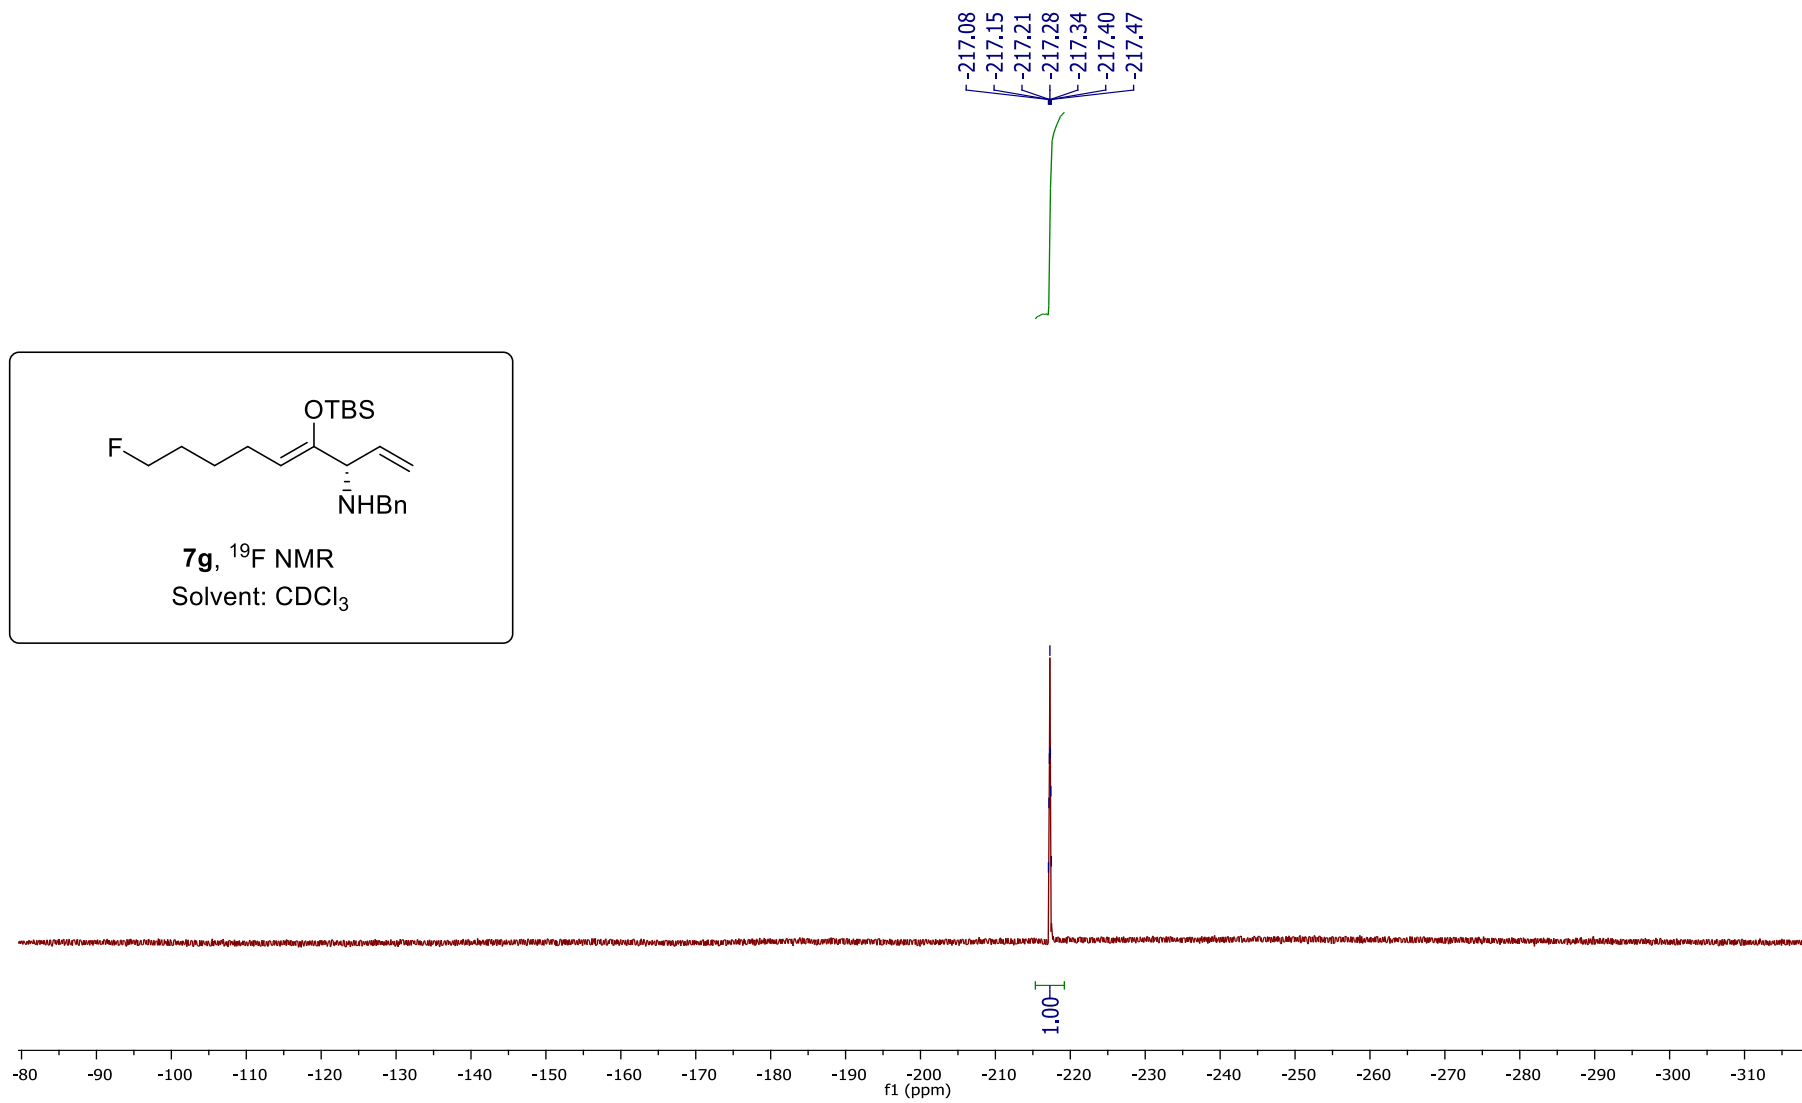

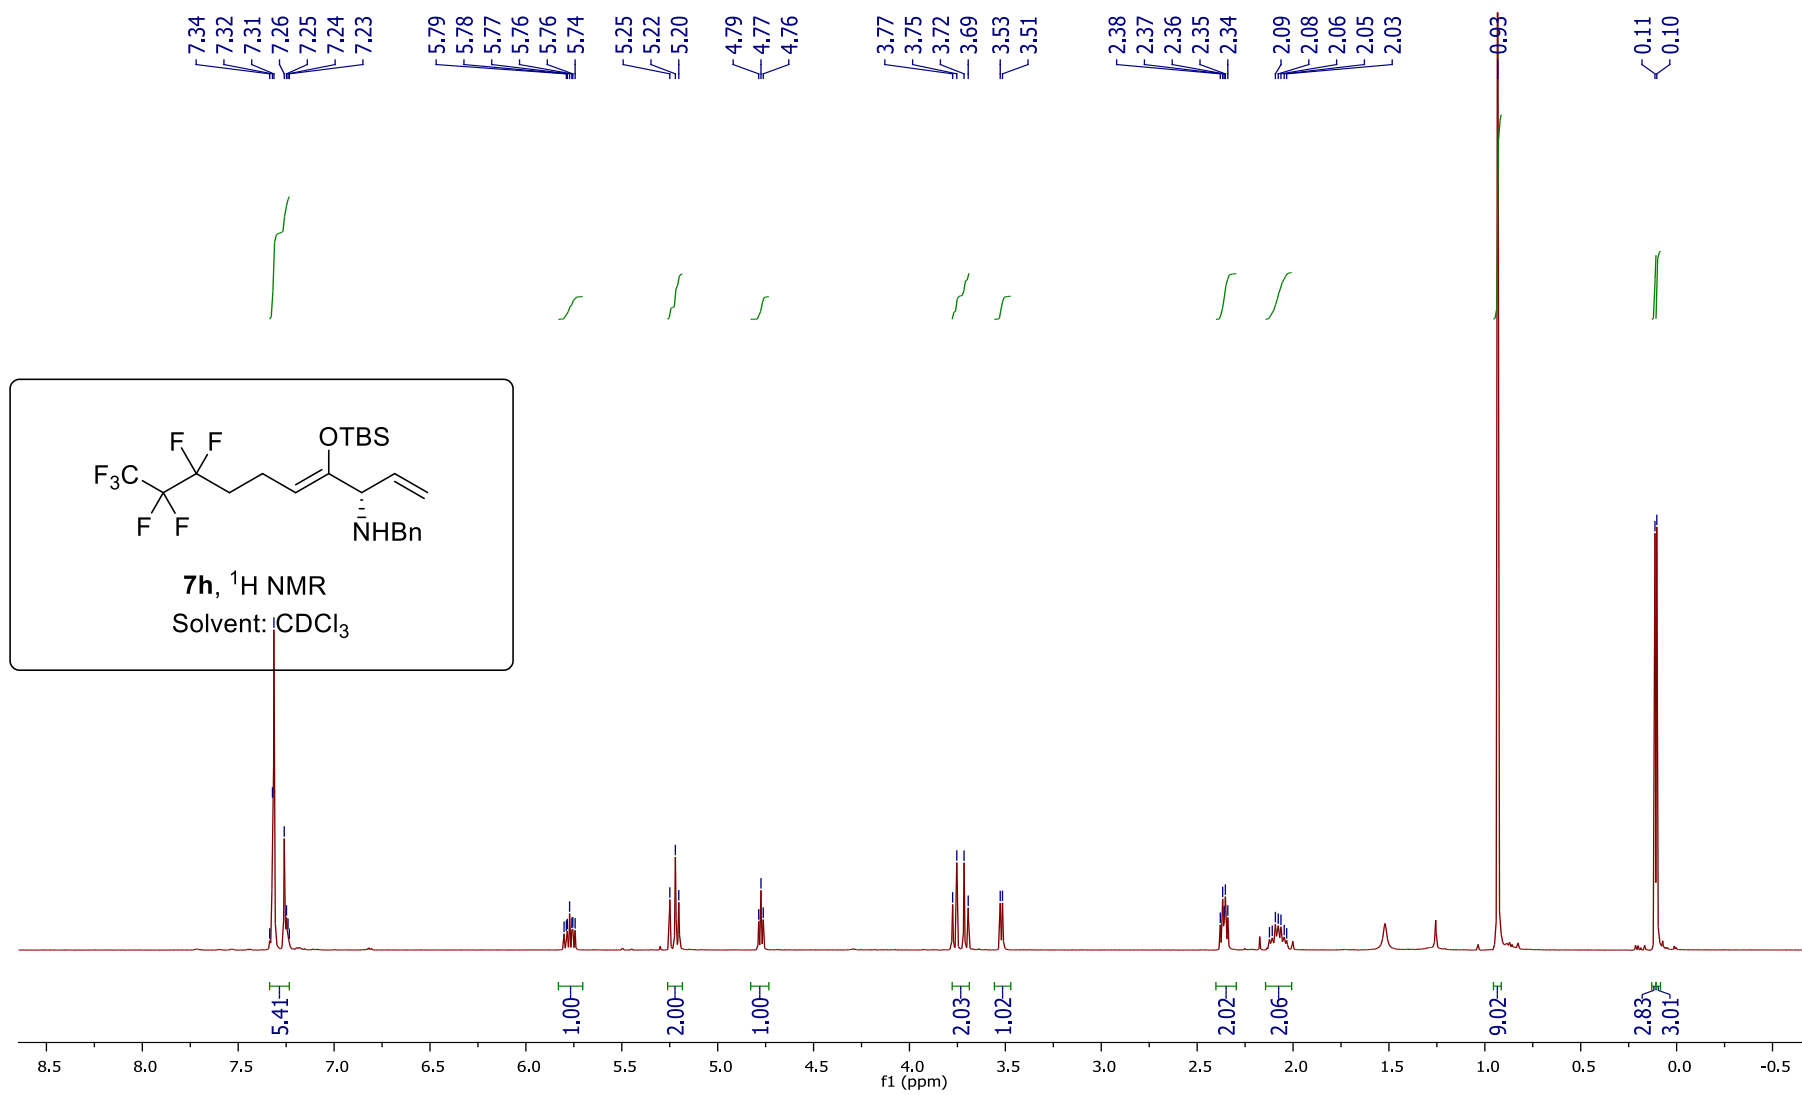

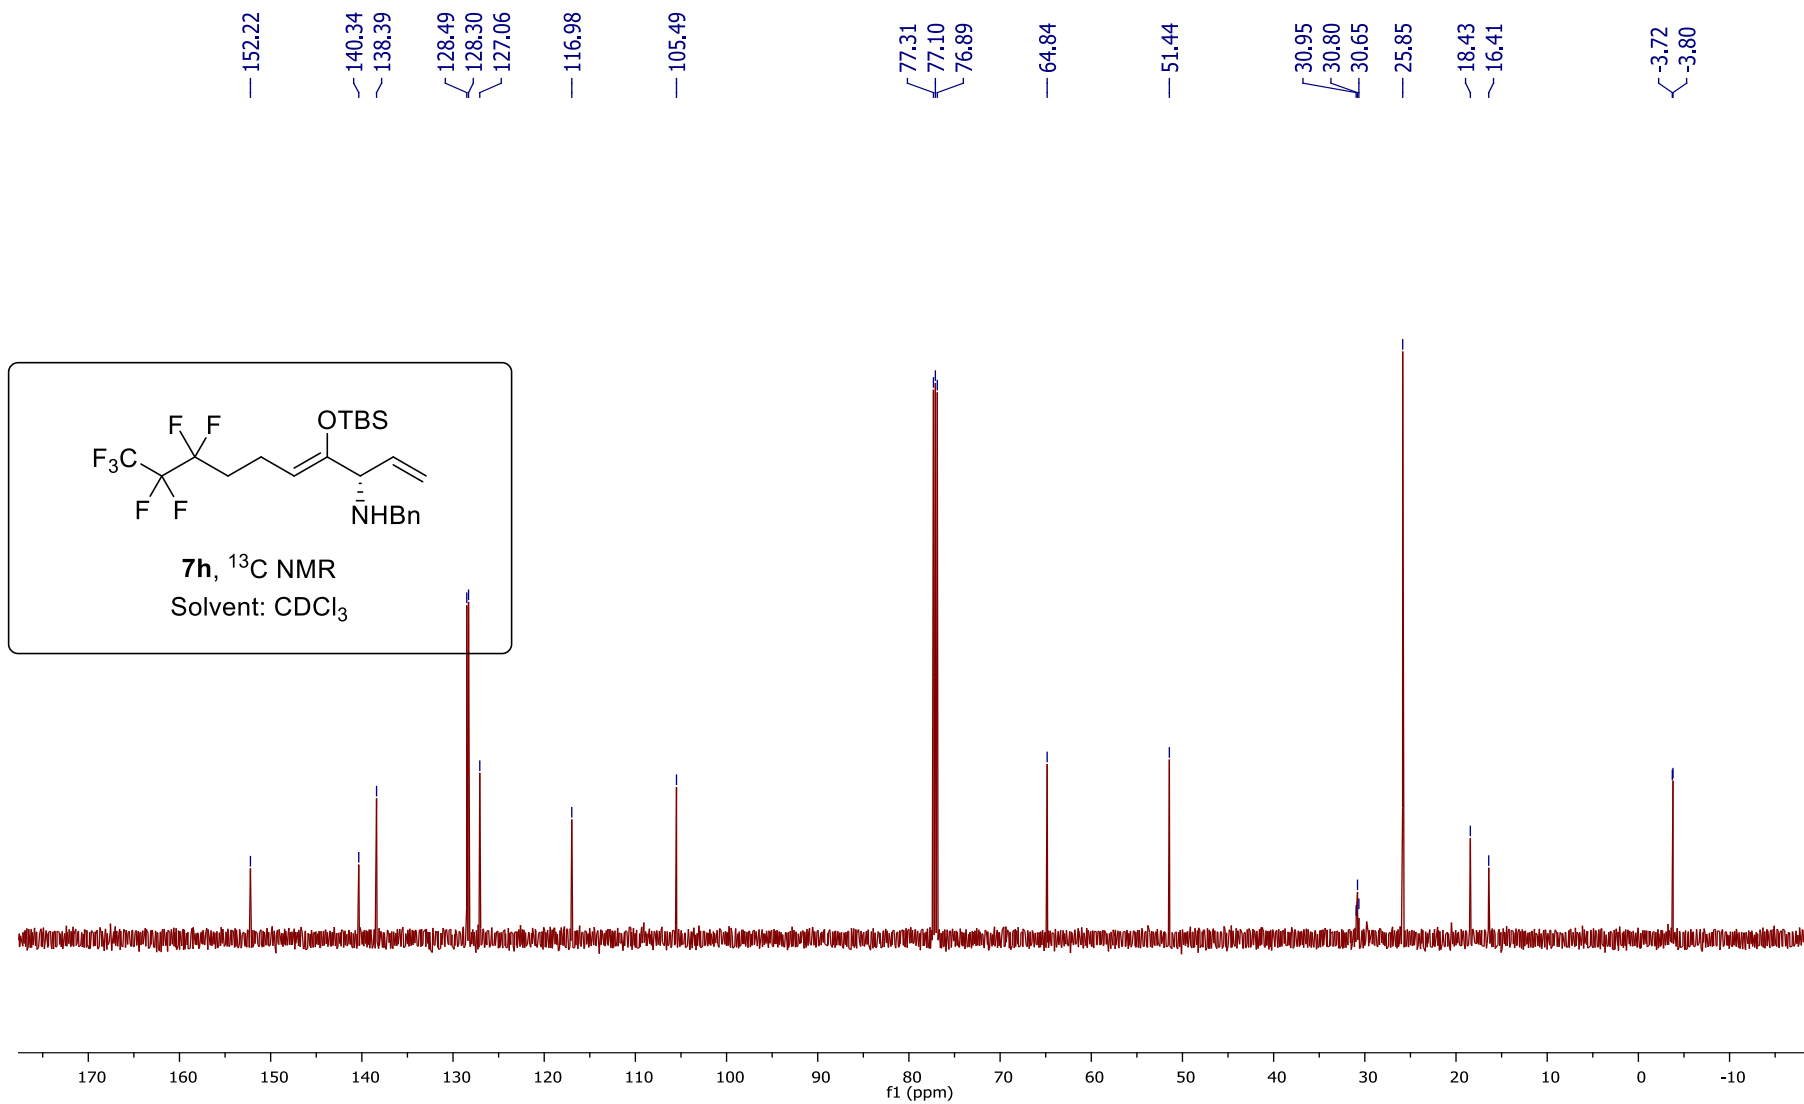

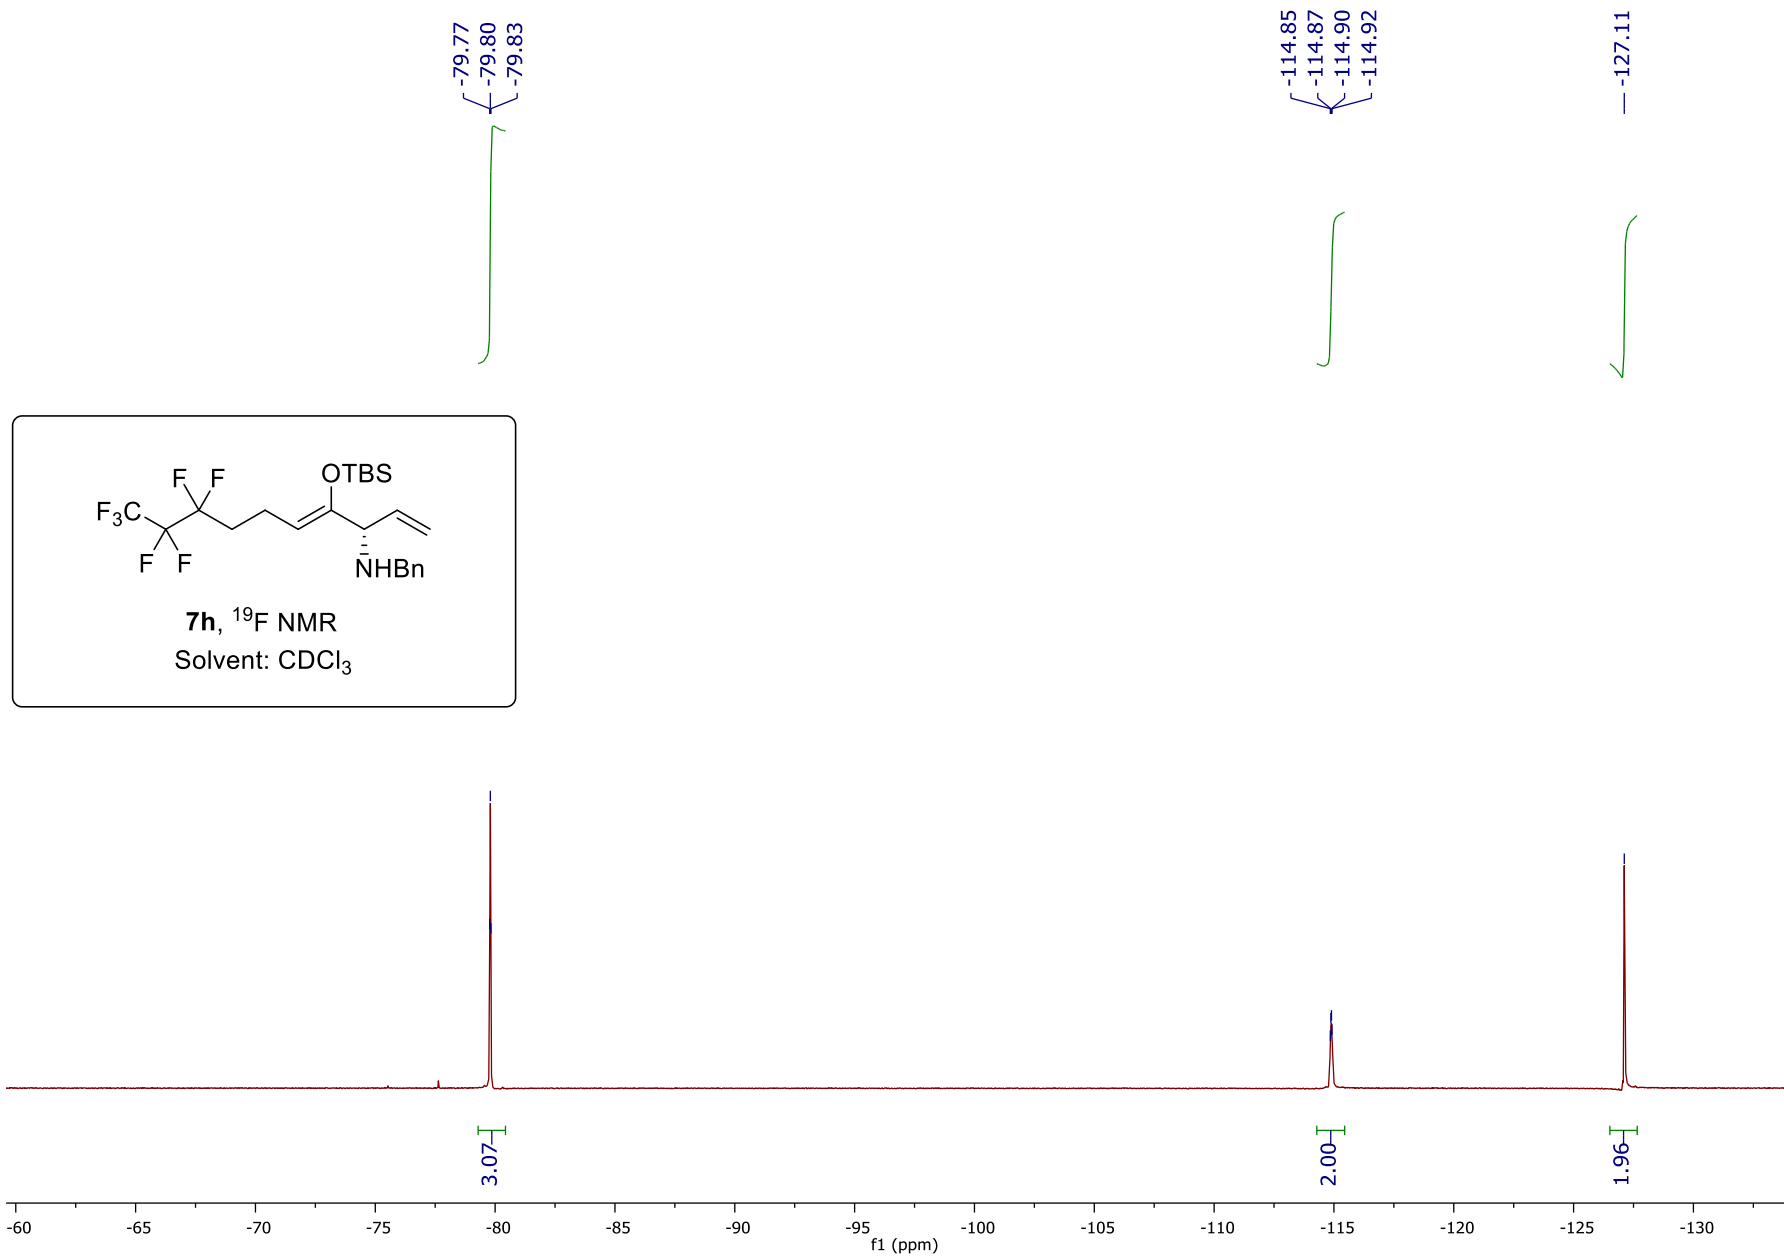



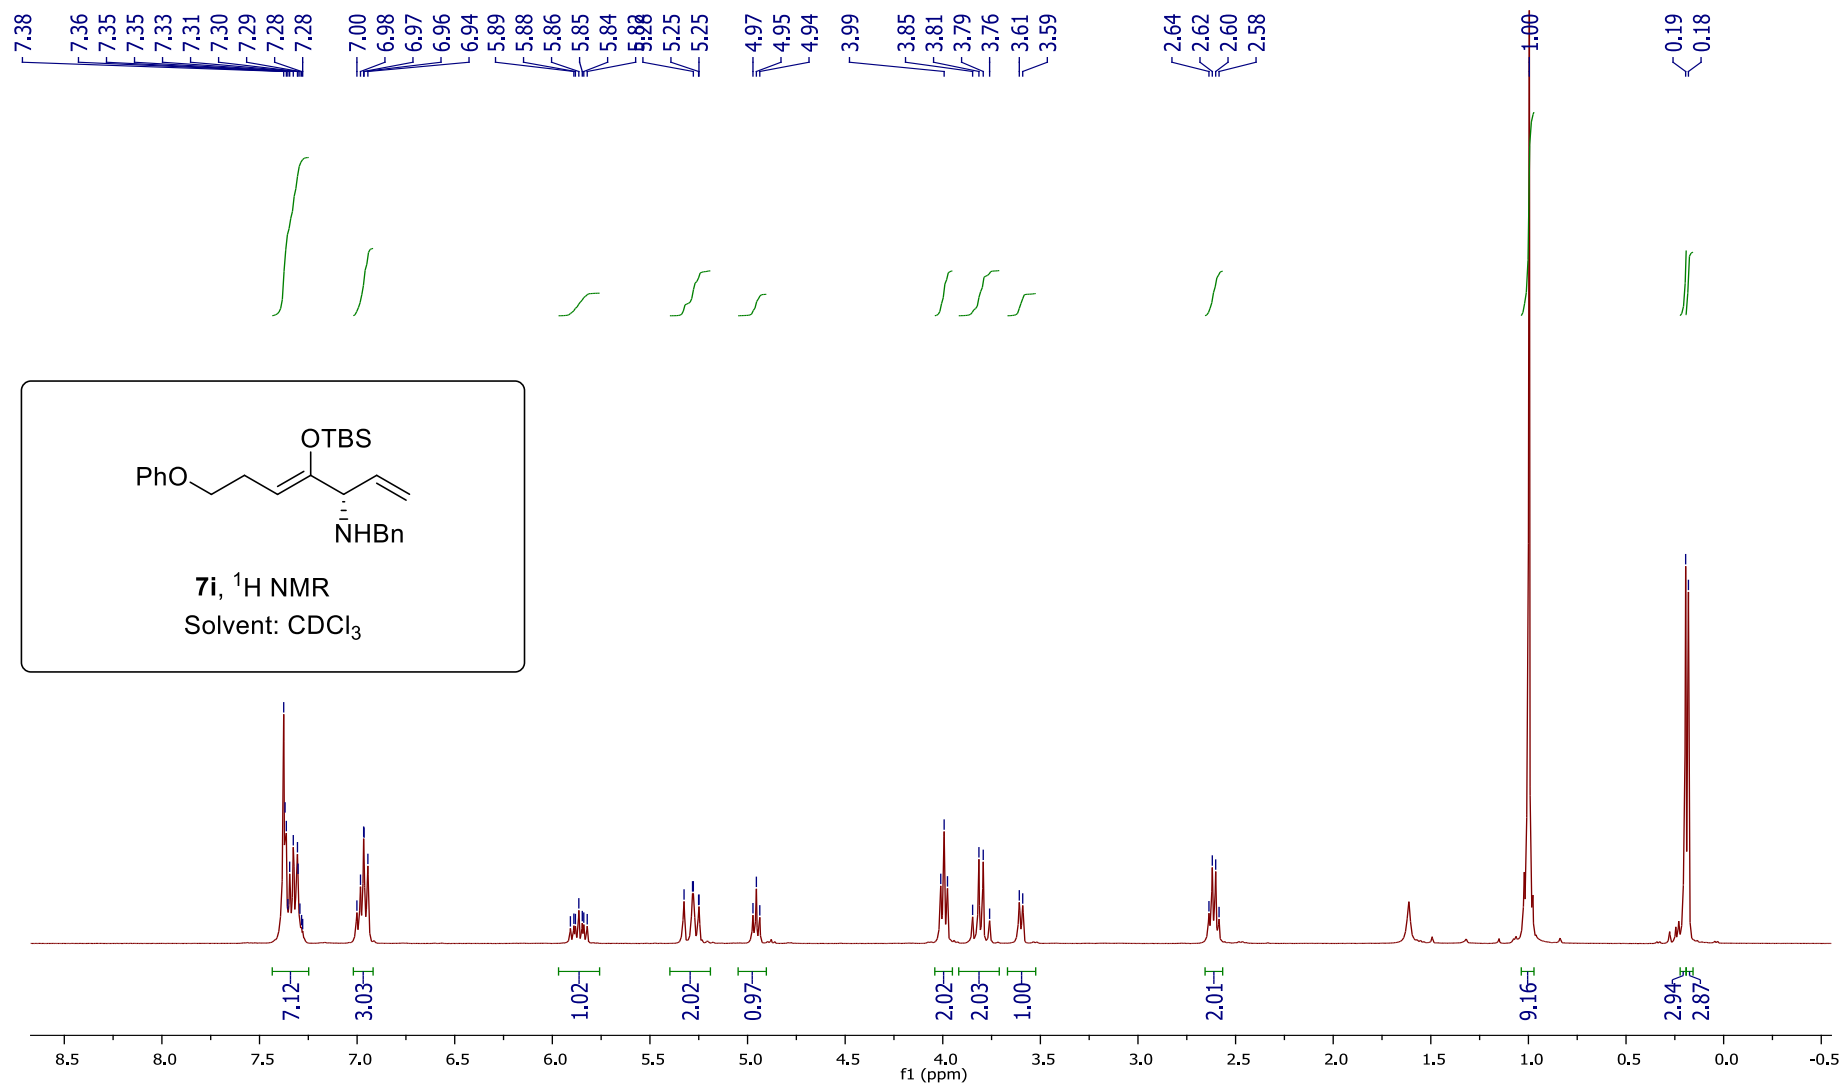

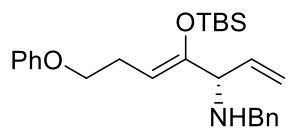

7i,  $^{13}\text{C}$  NMR  
Solvent:  $\text{CDCl}_3$

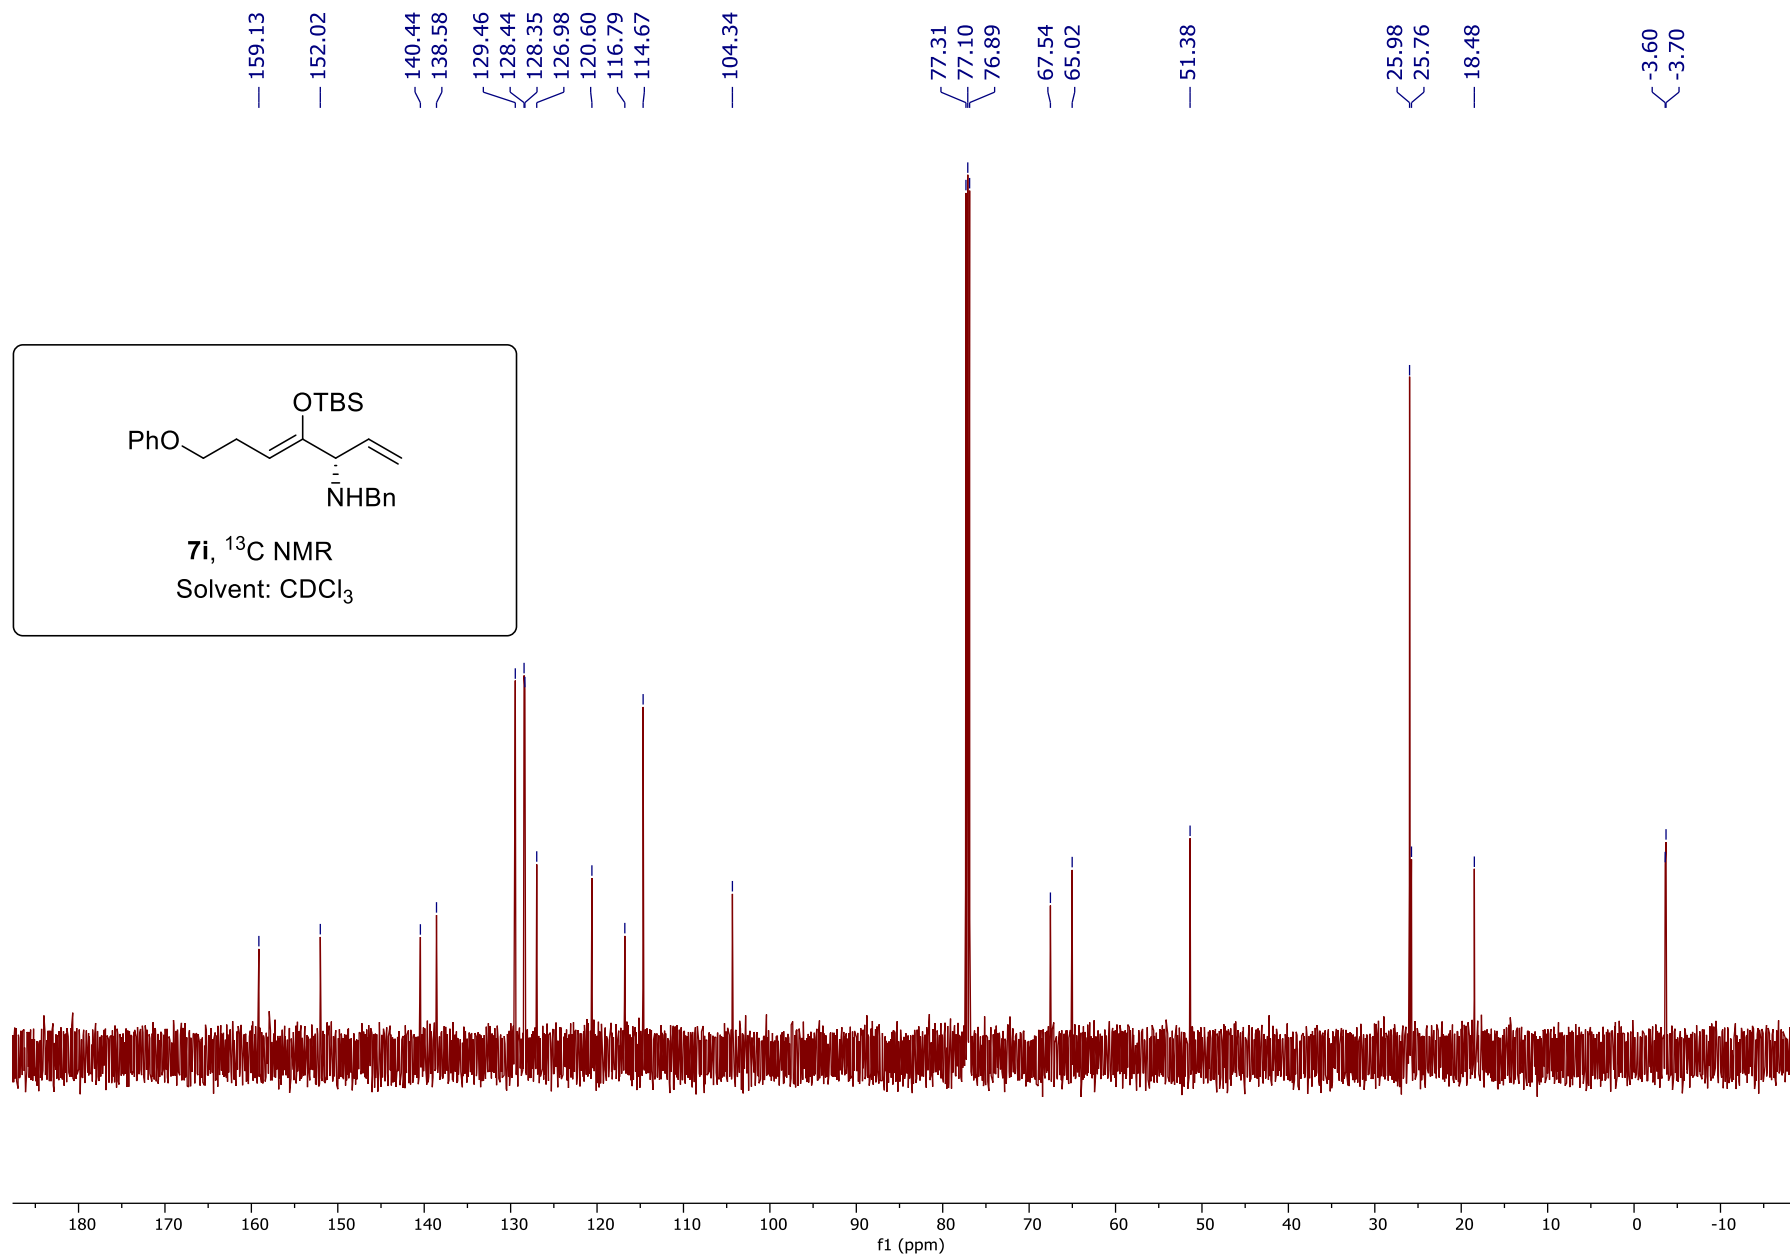

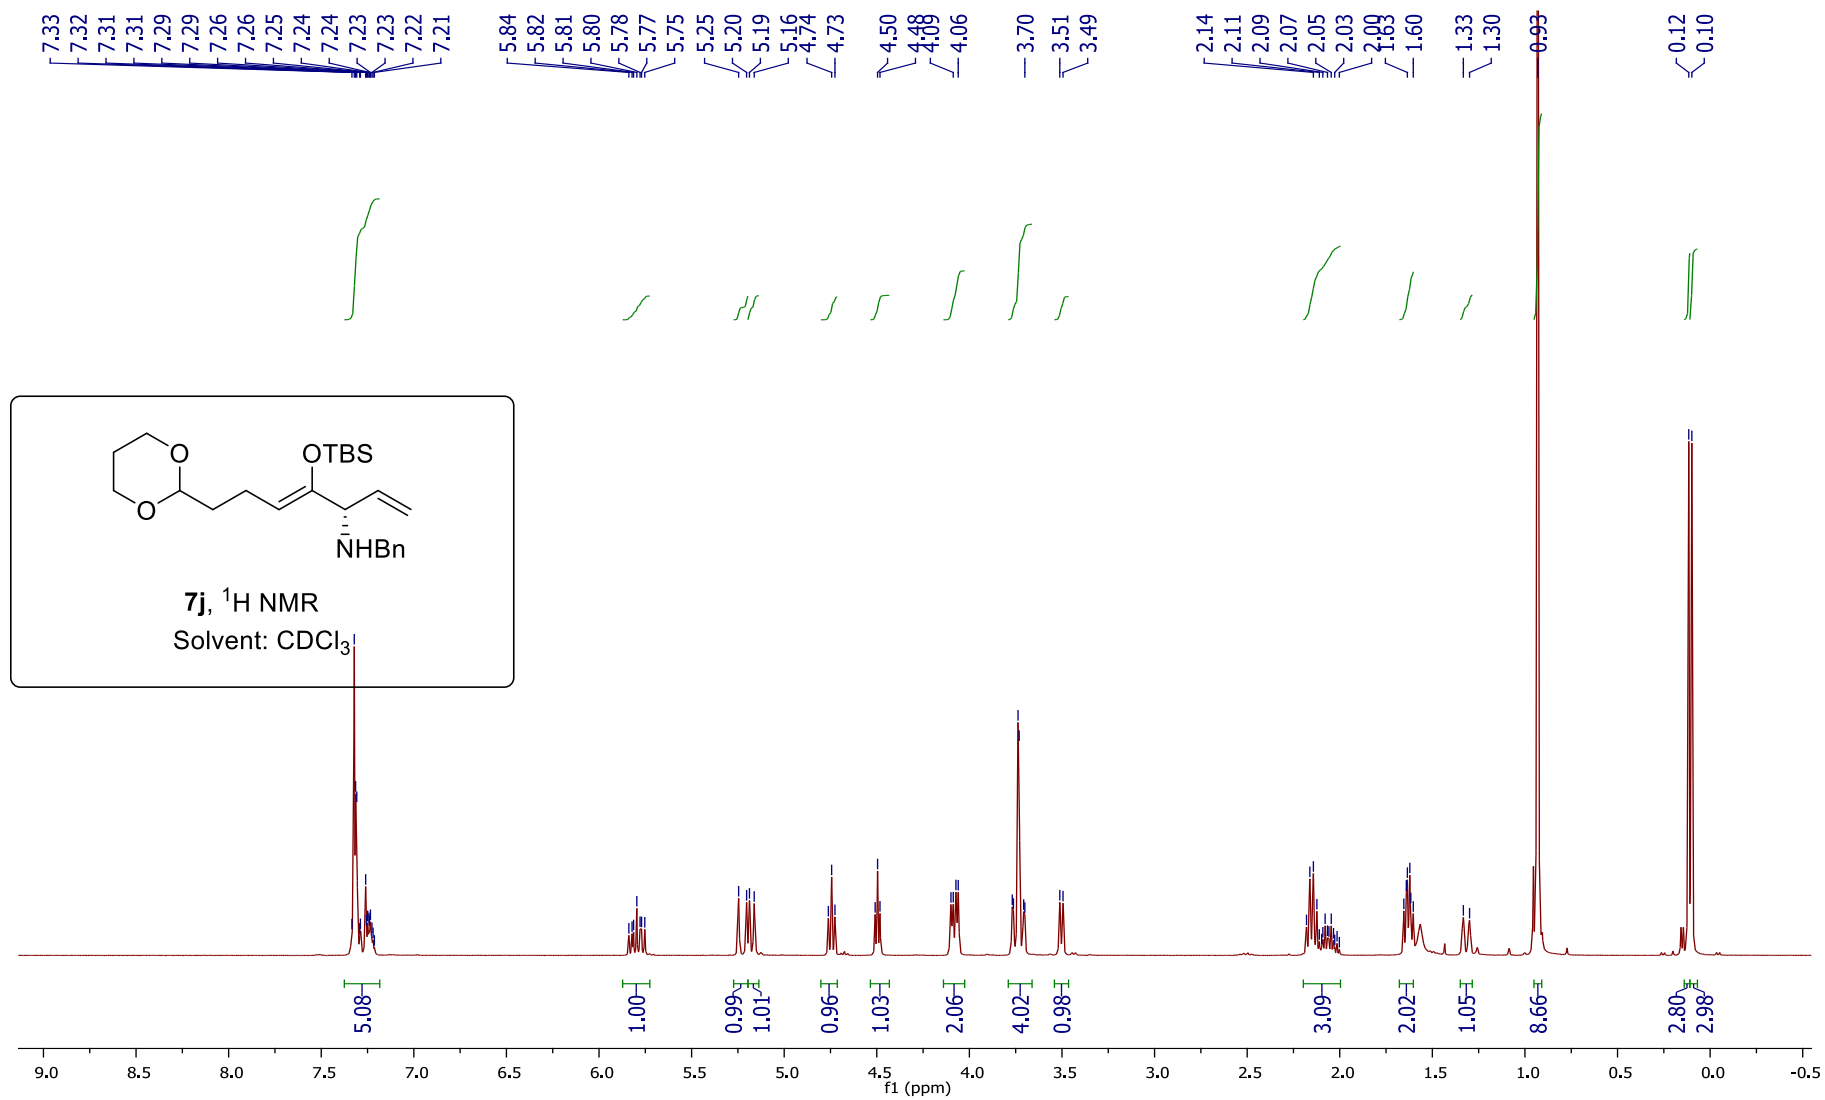

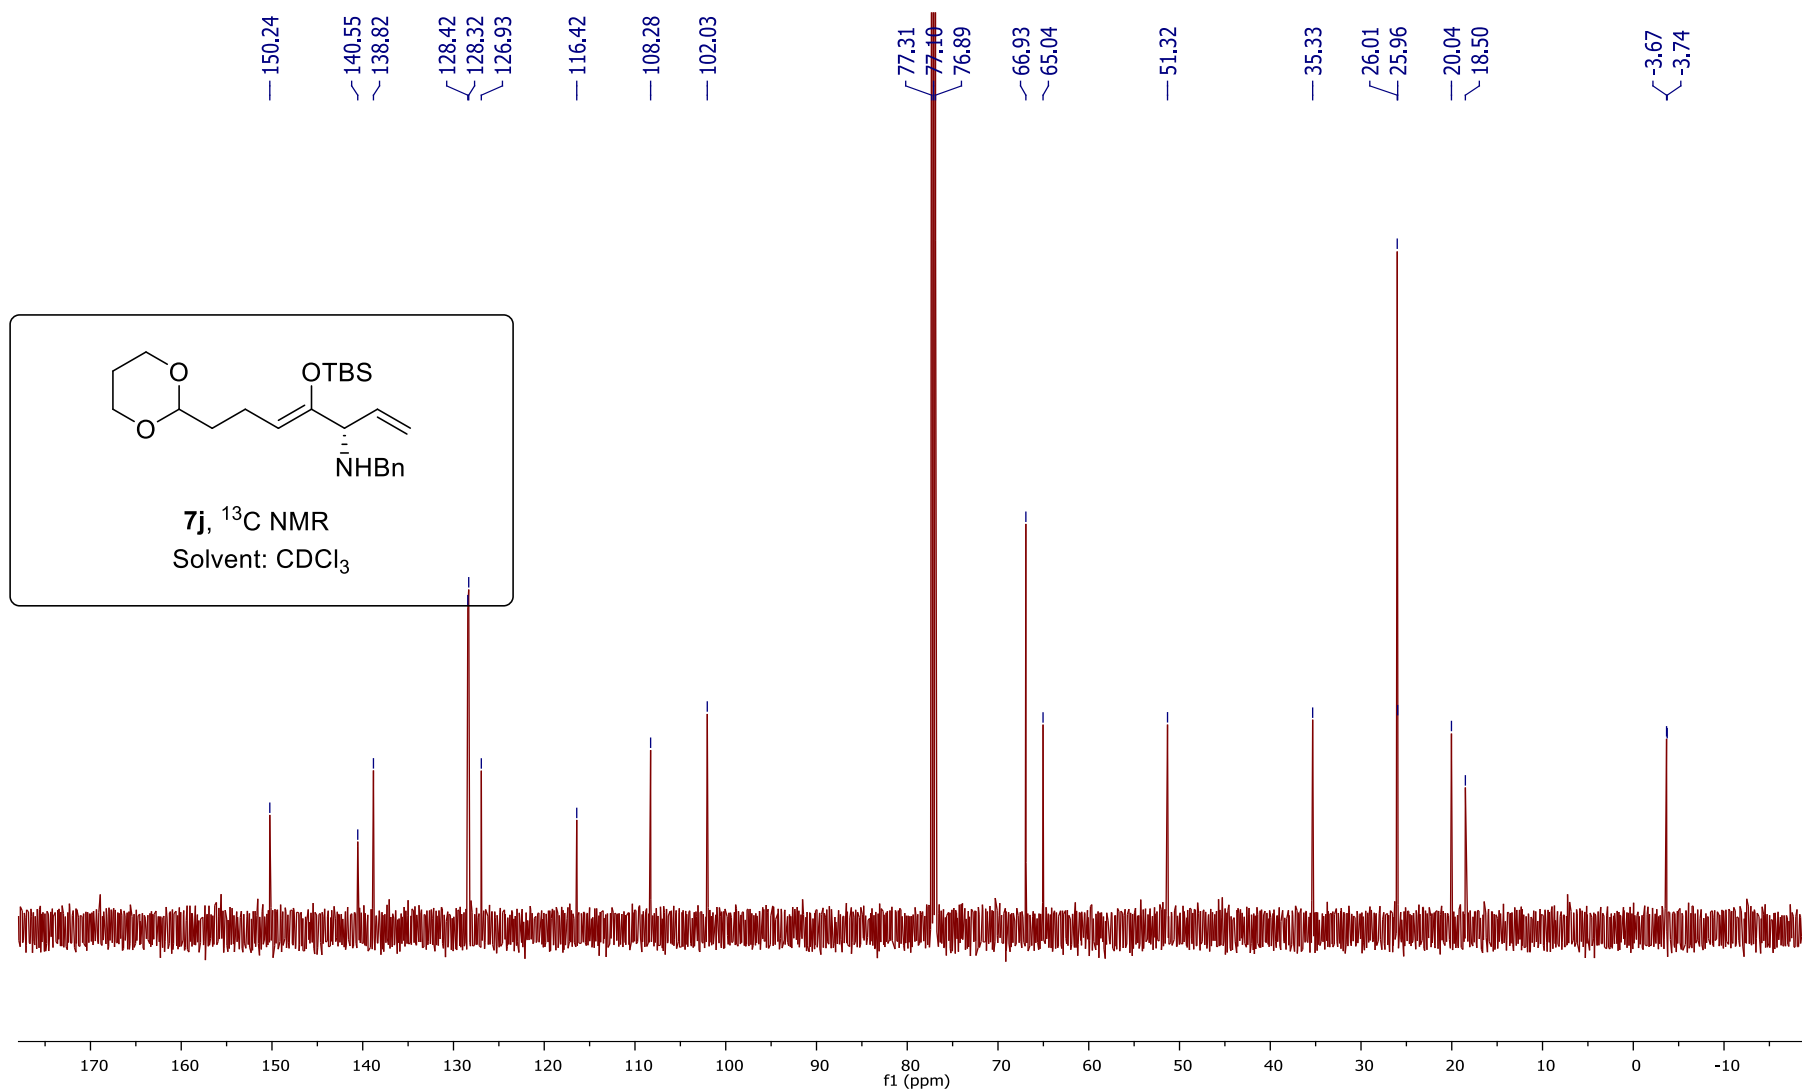

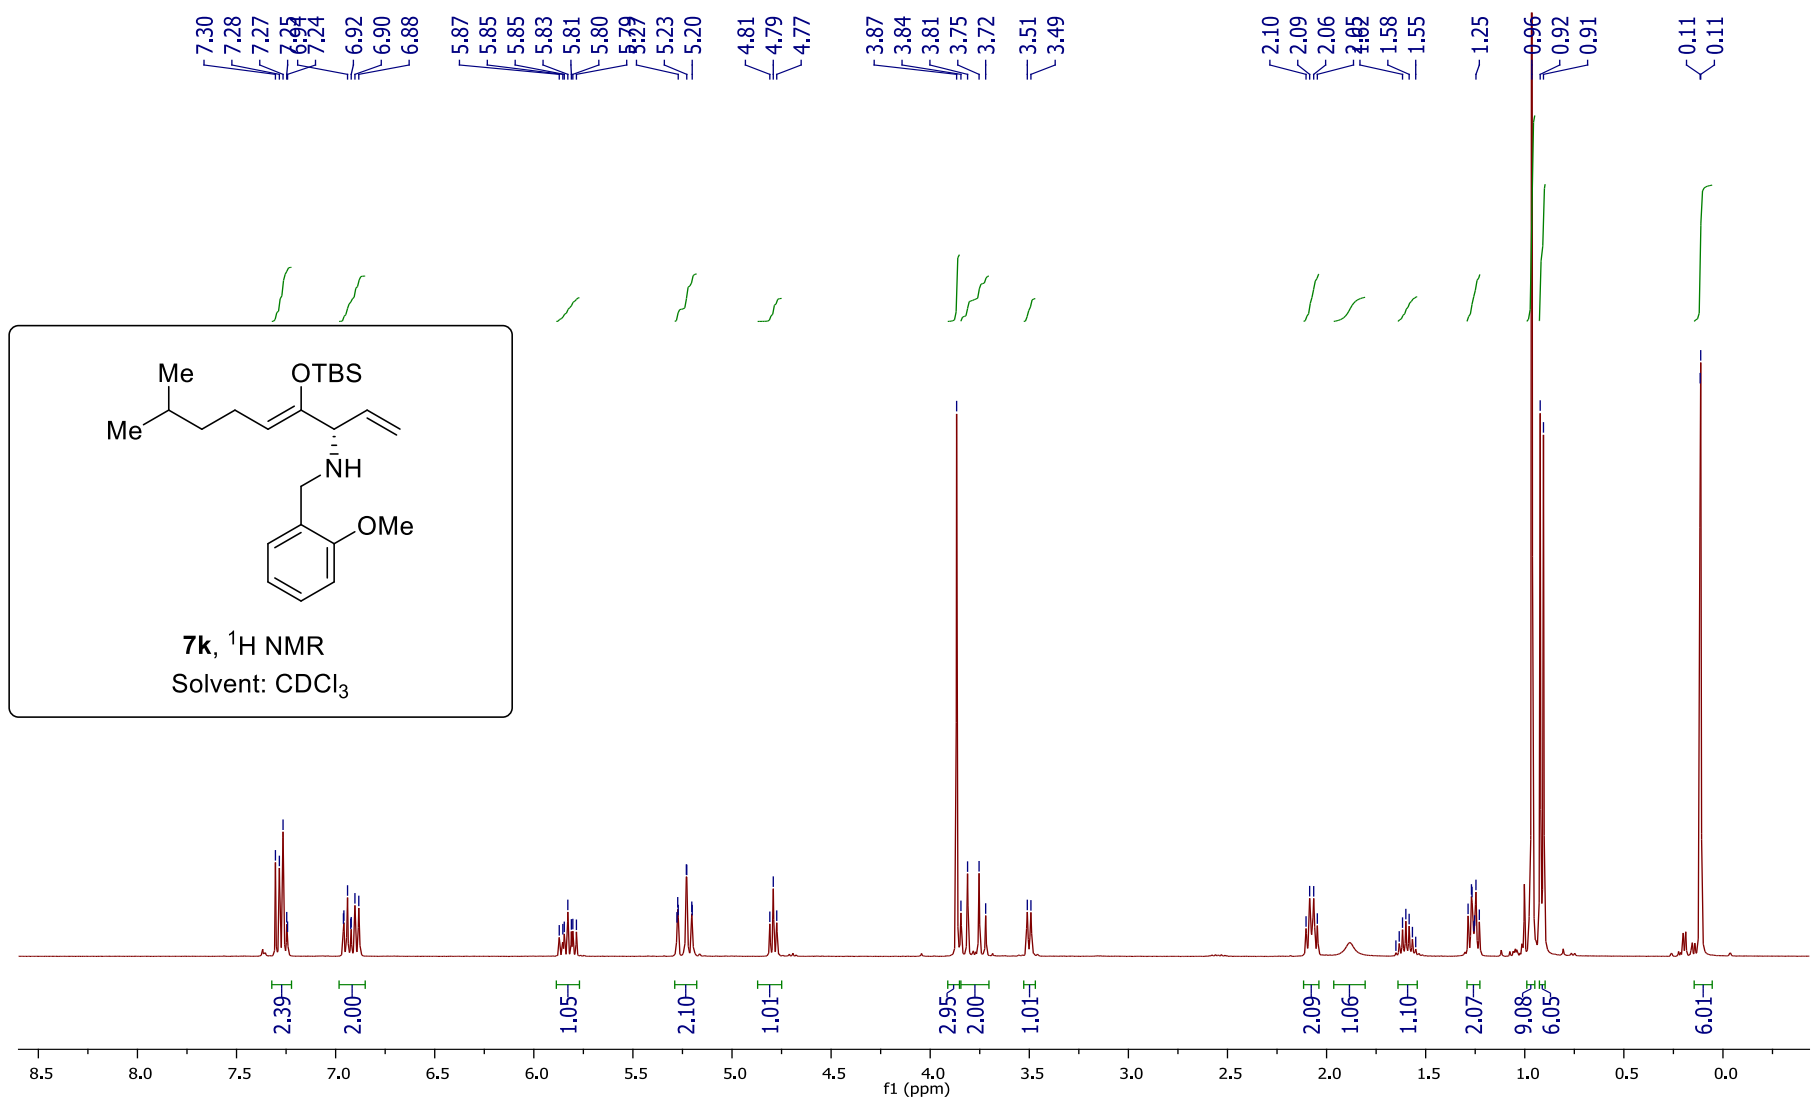

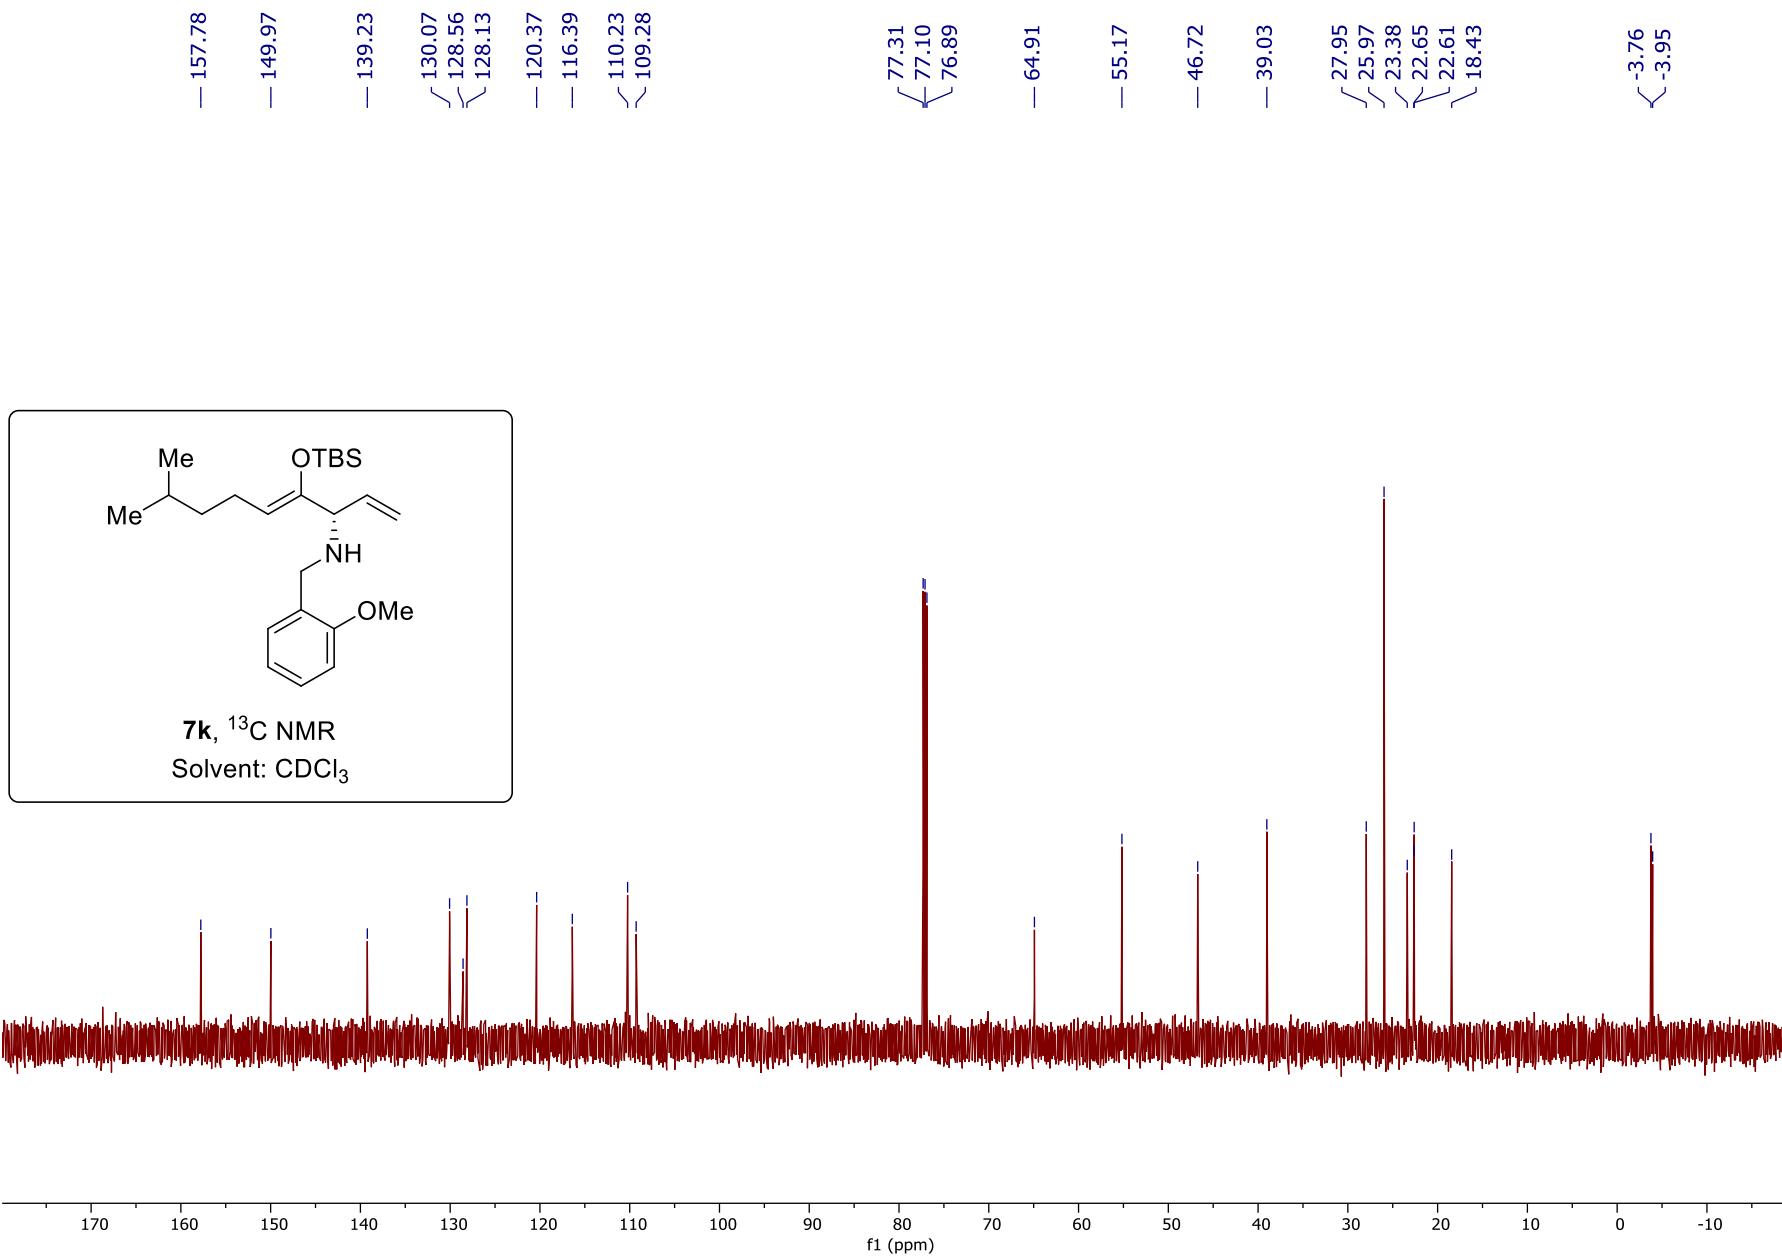

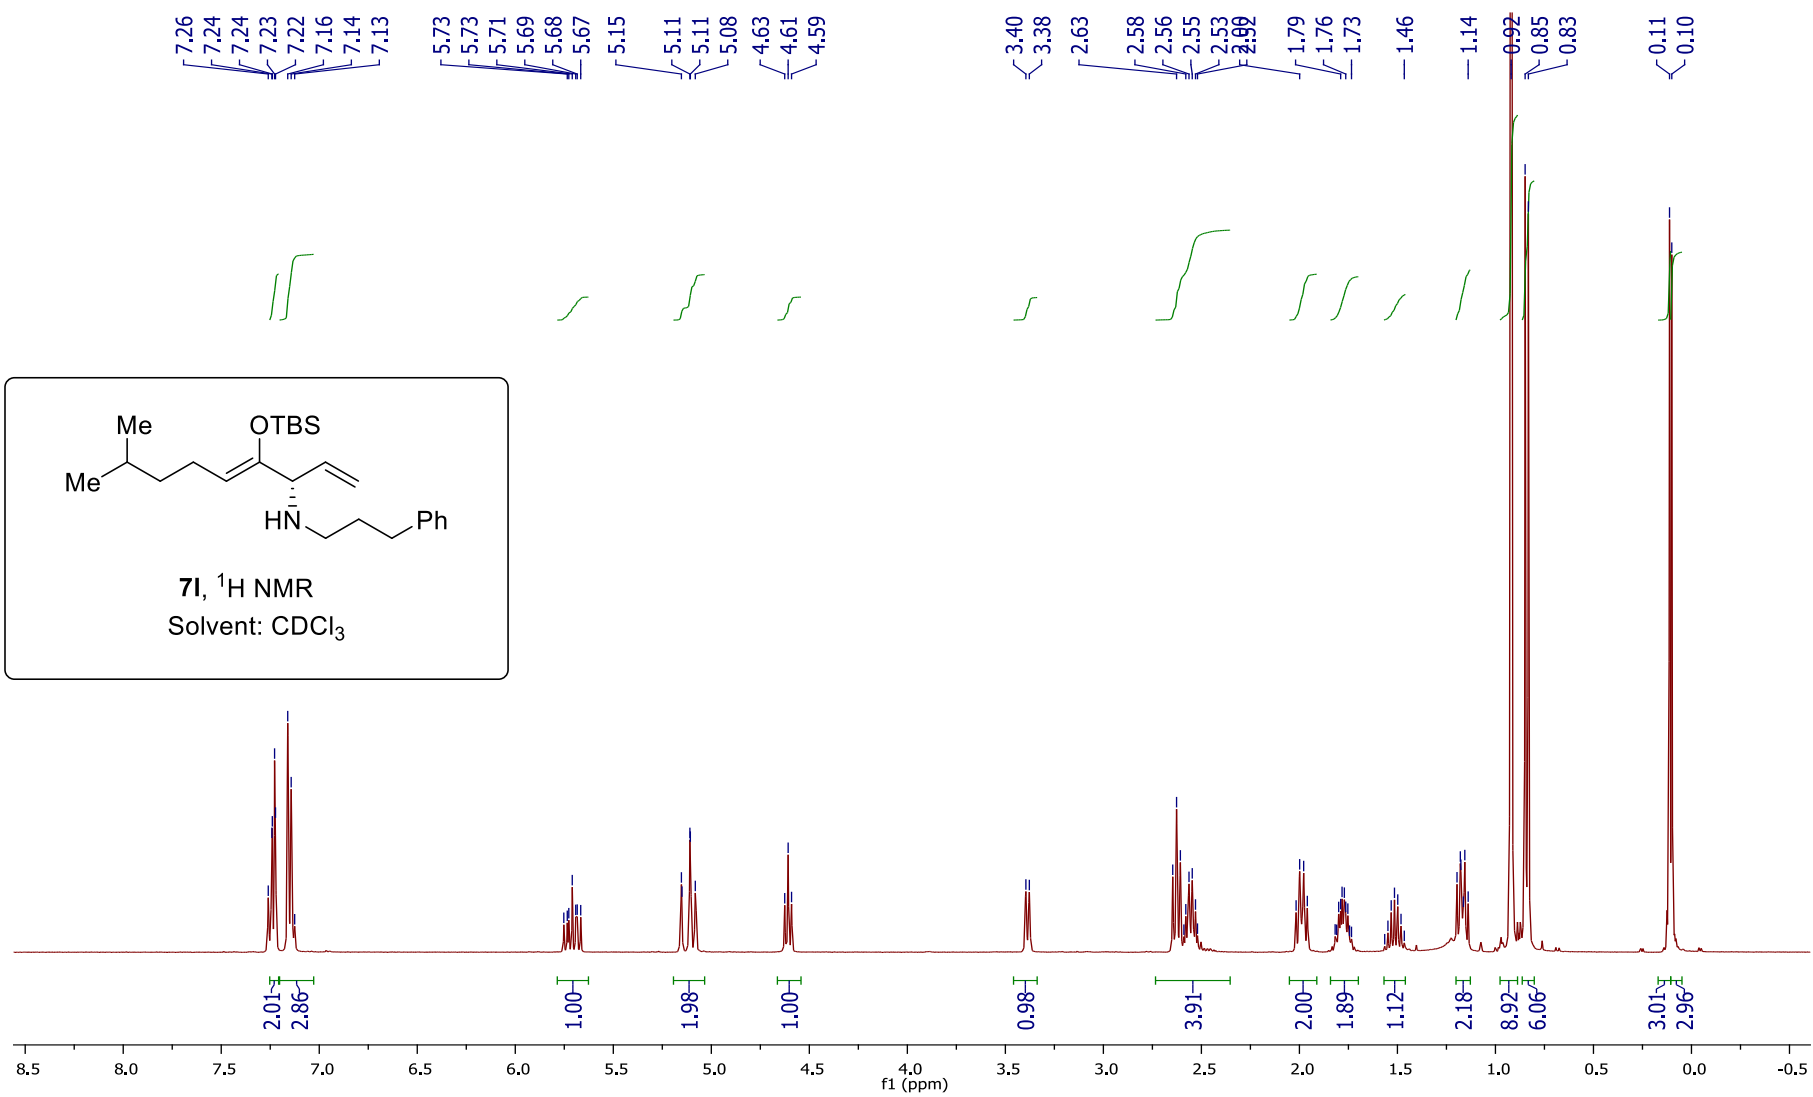

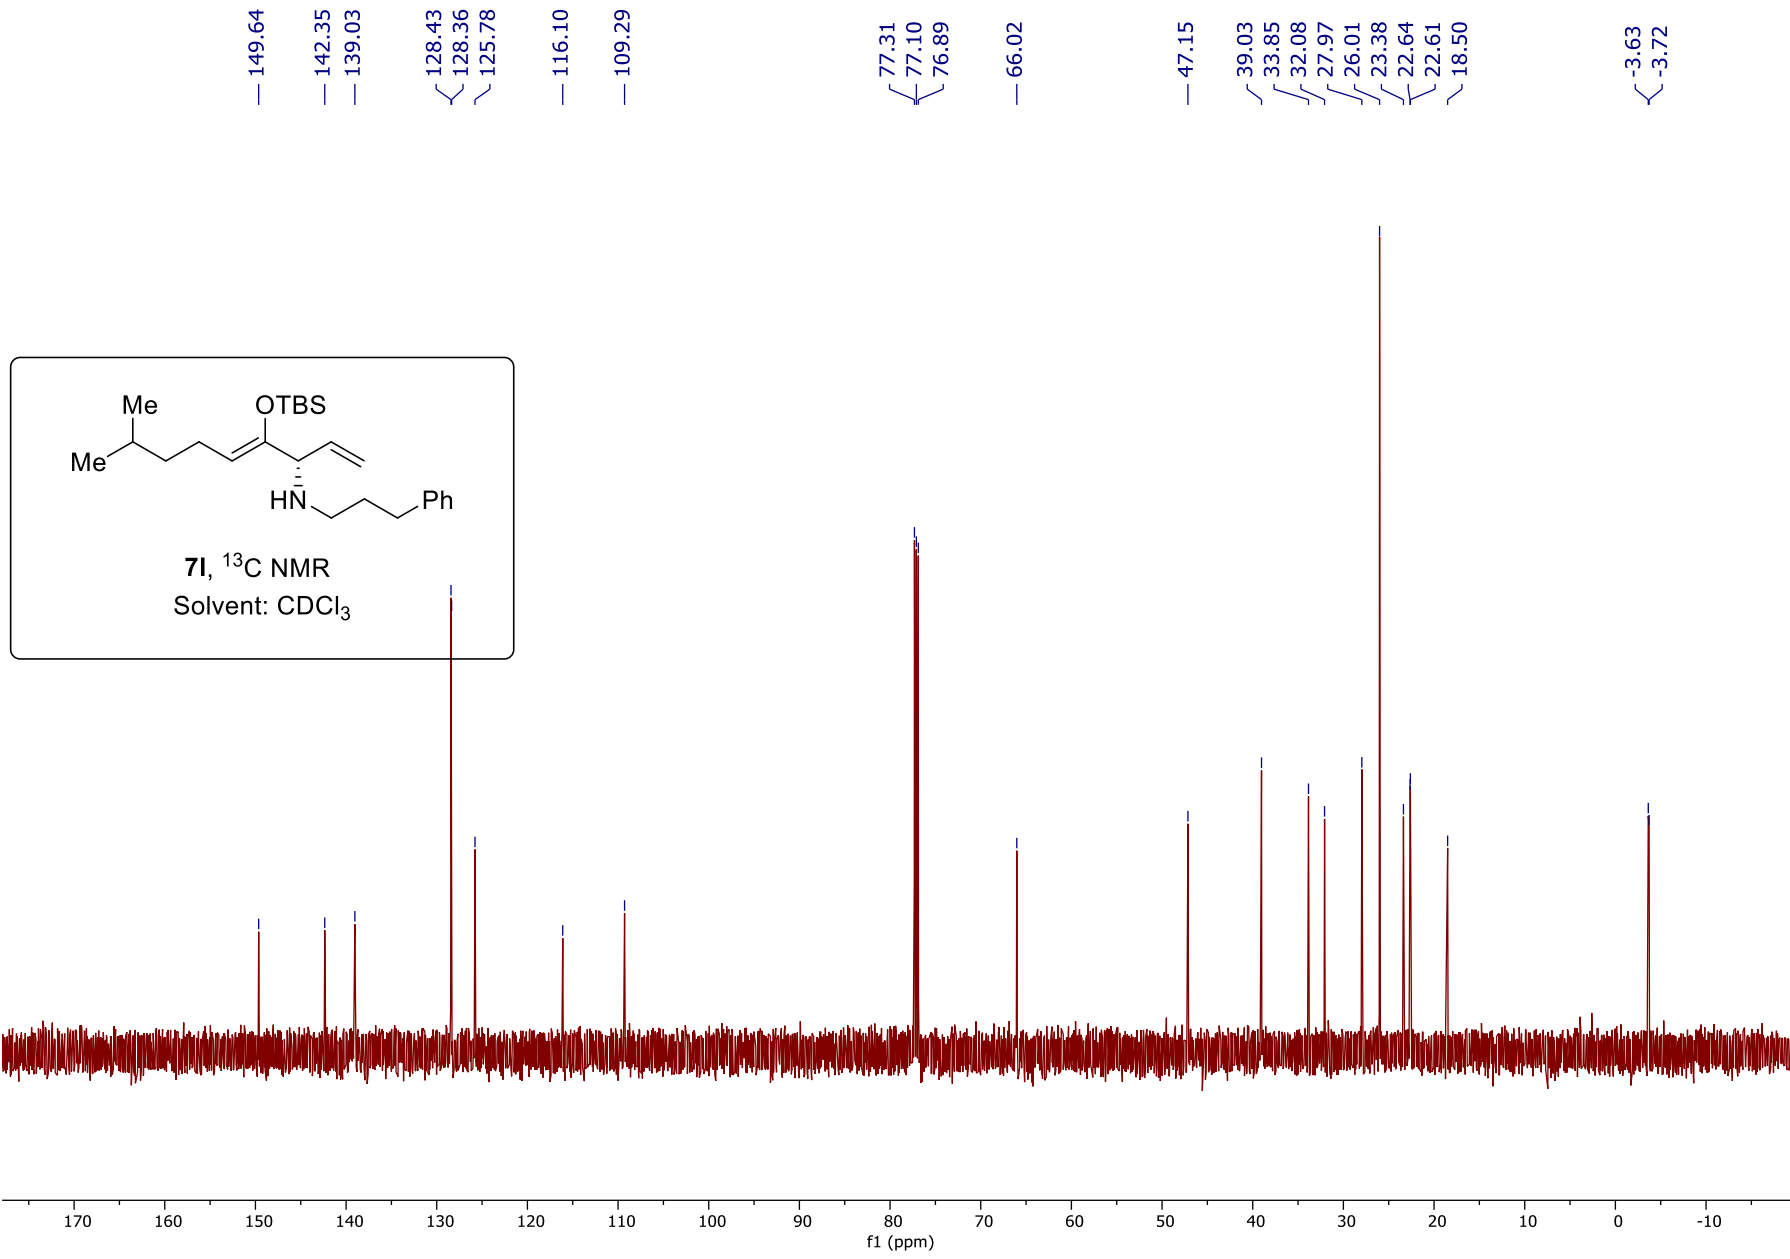



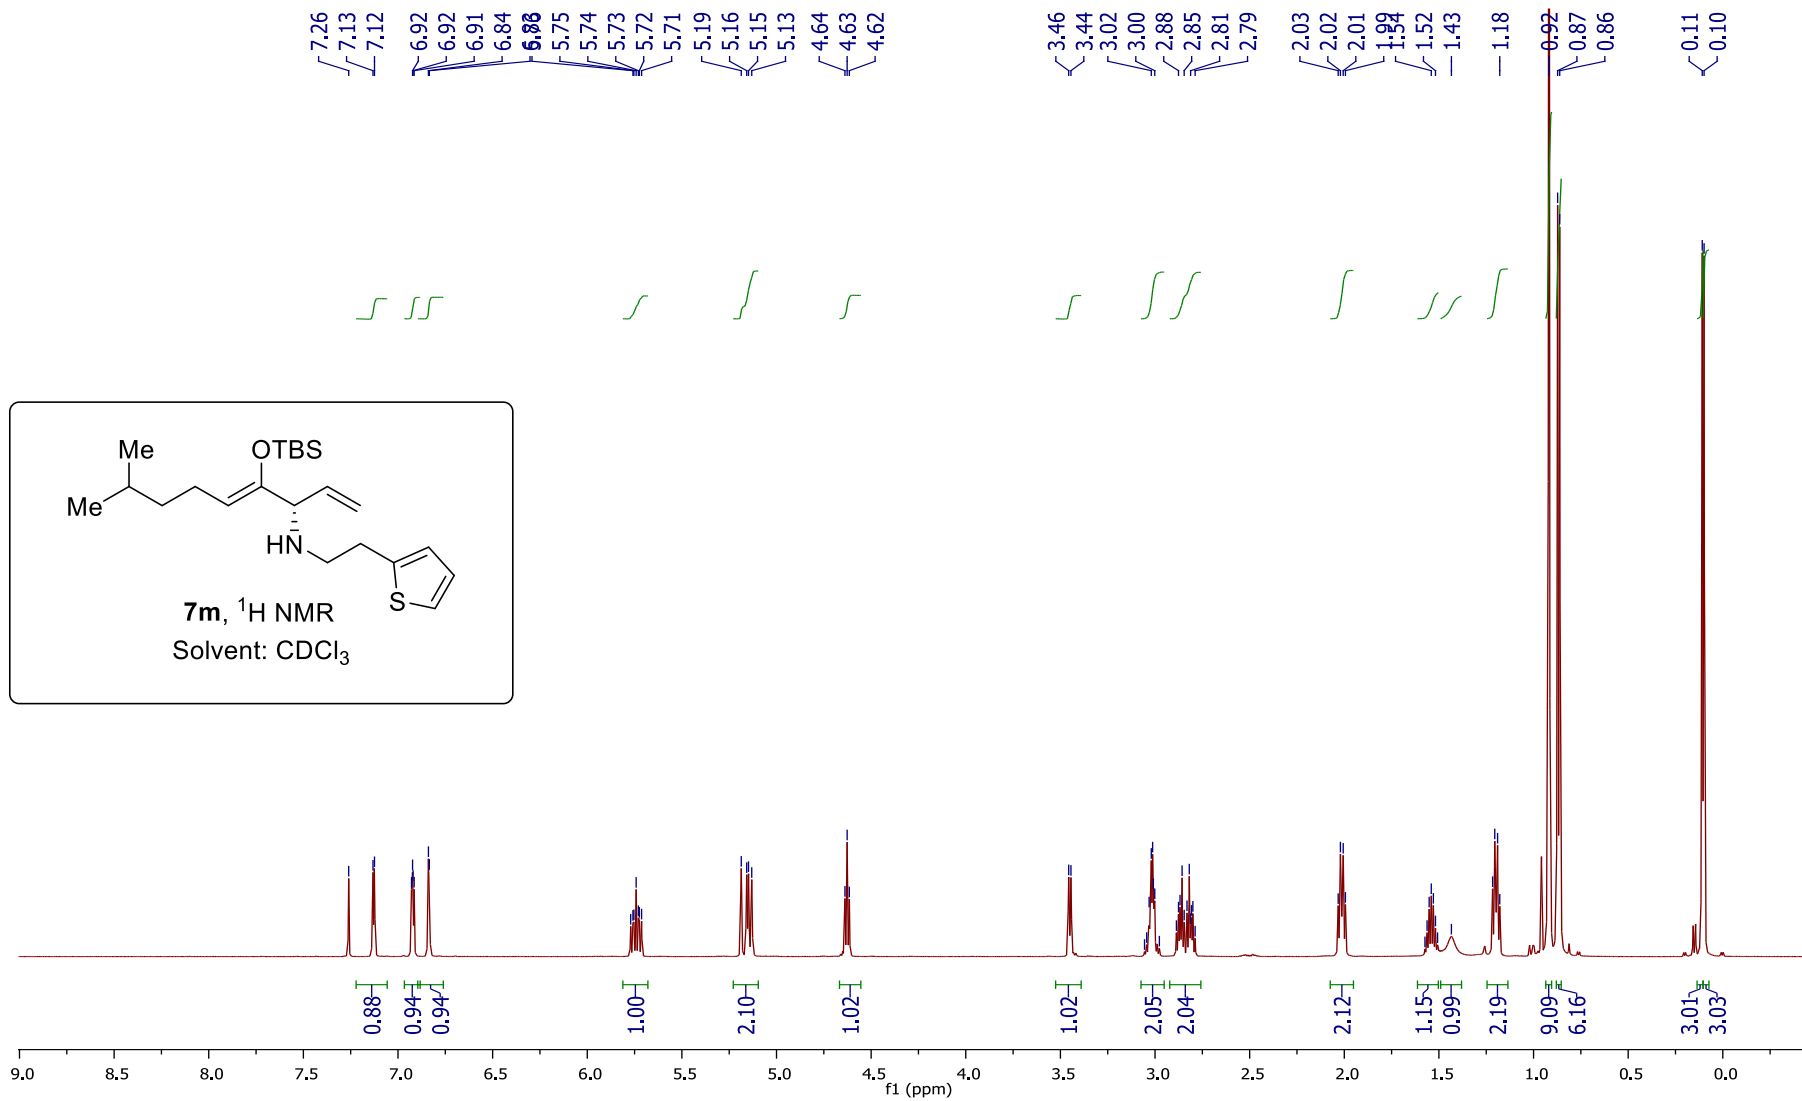

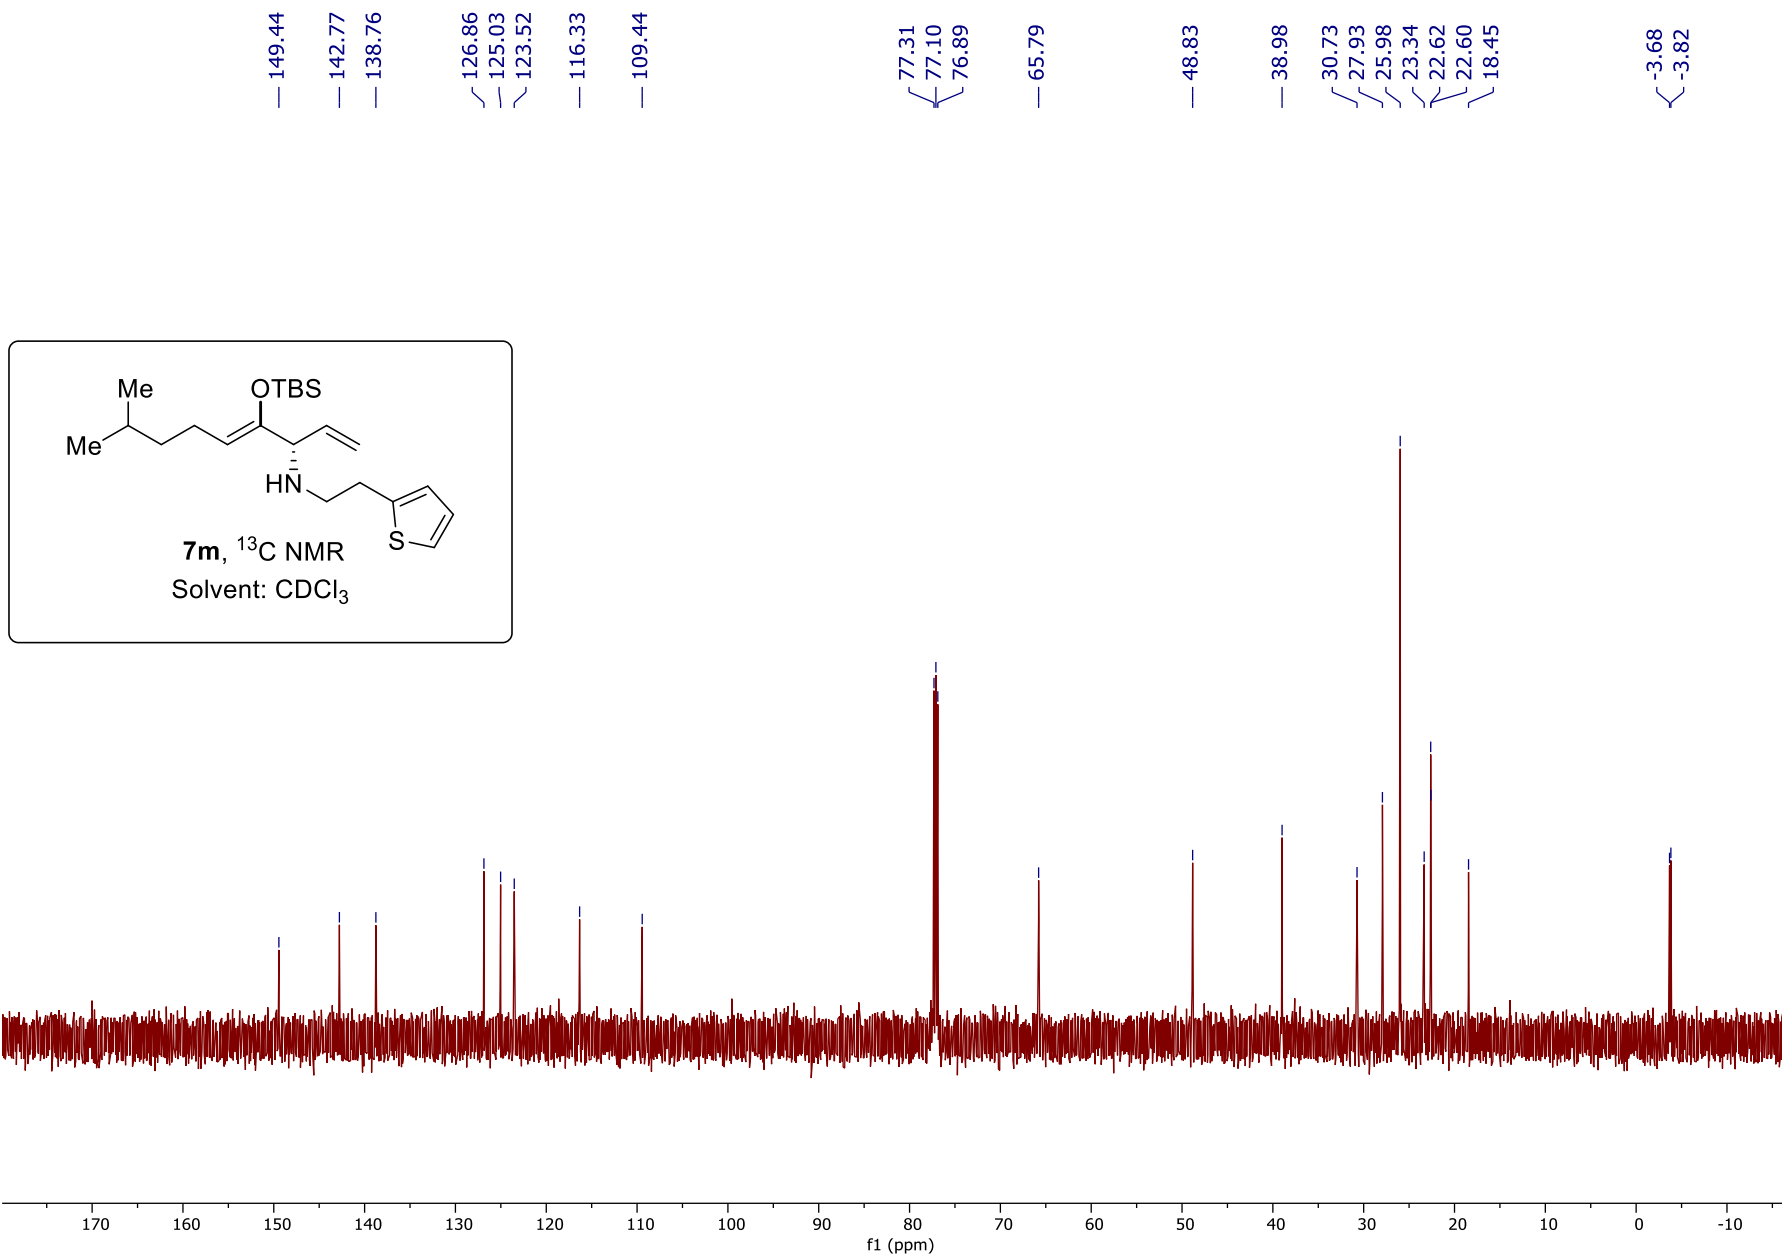

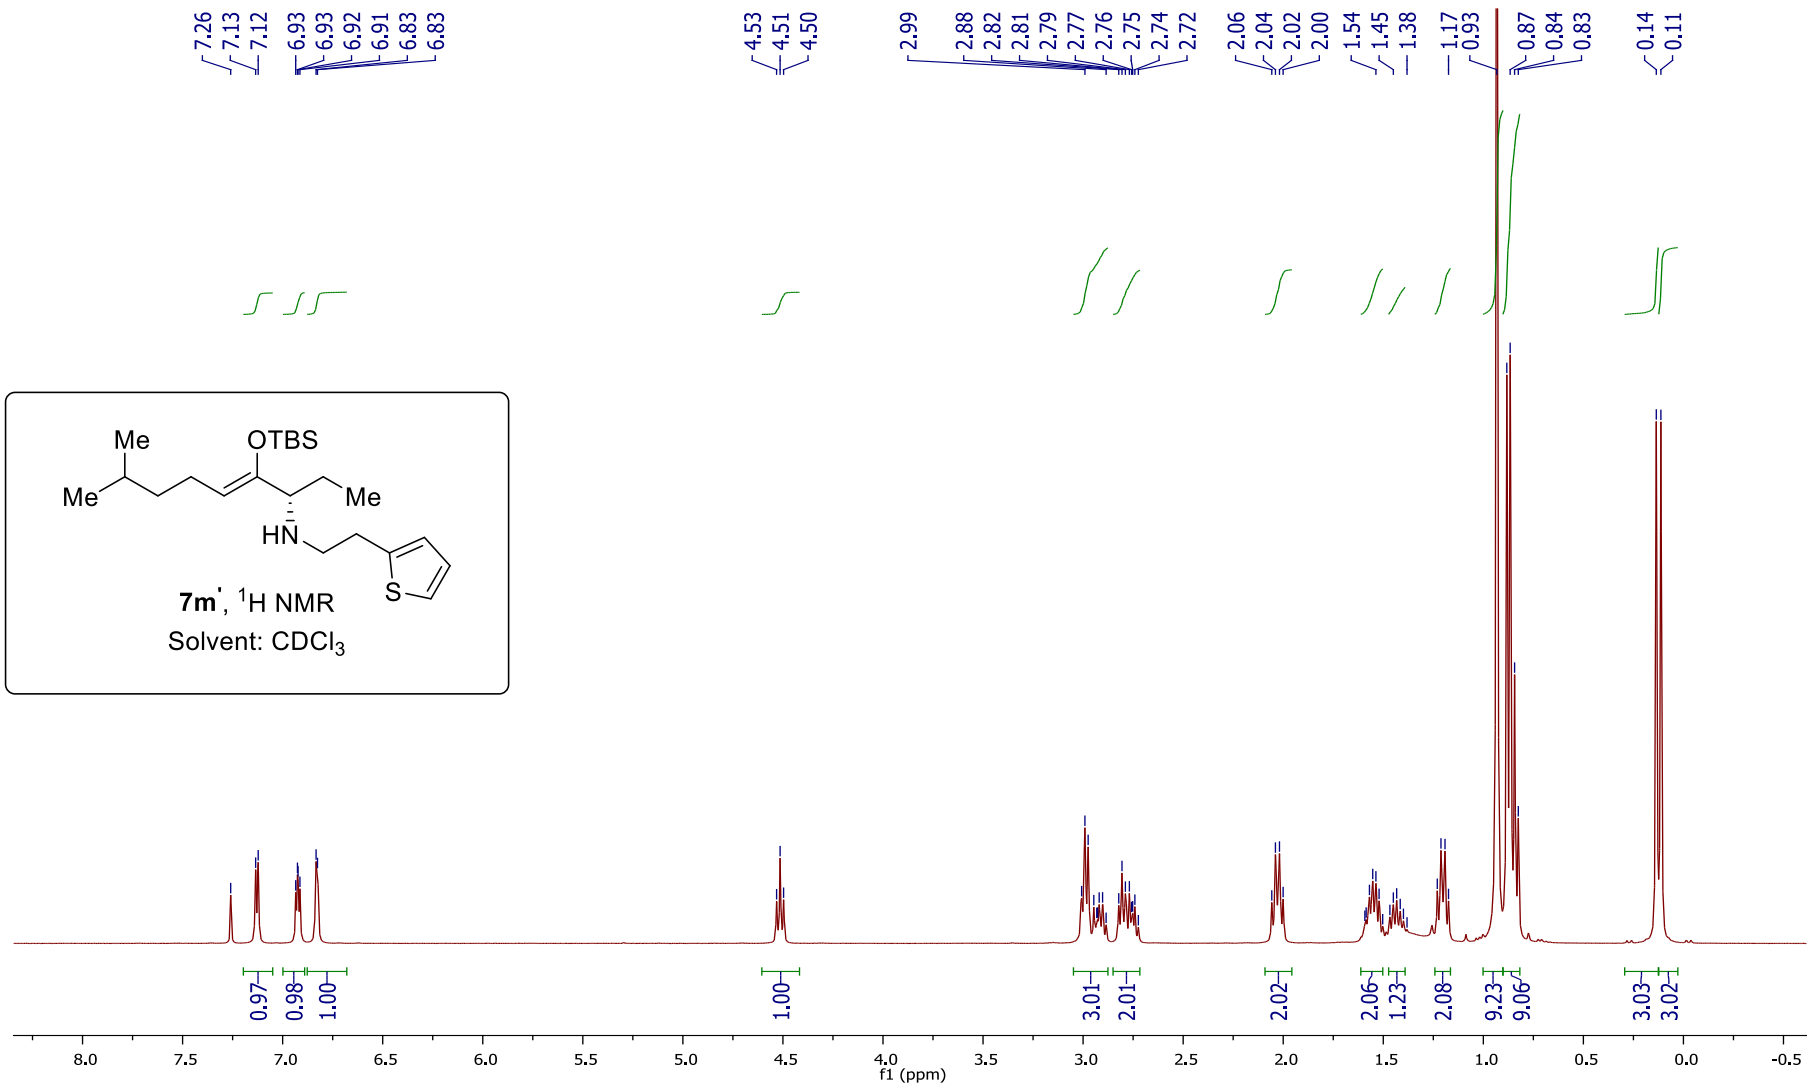

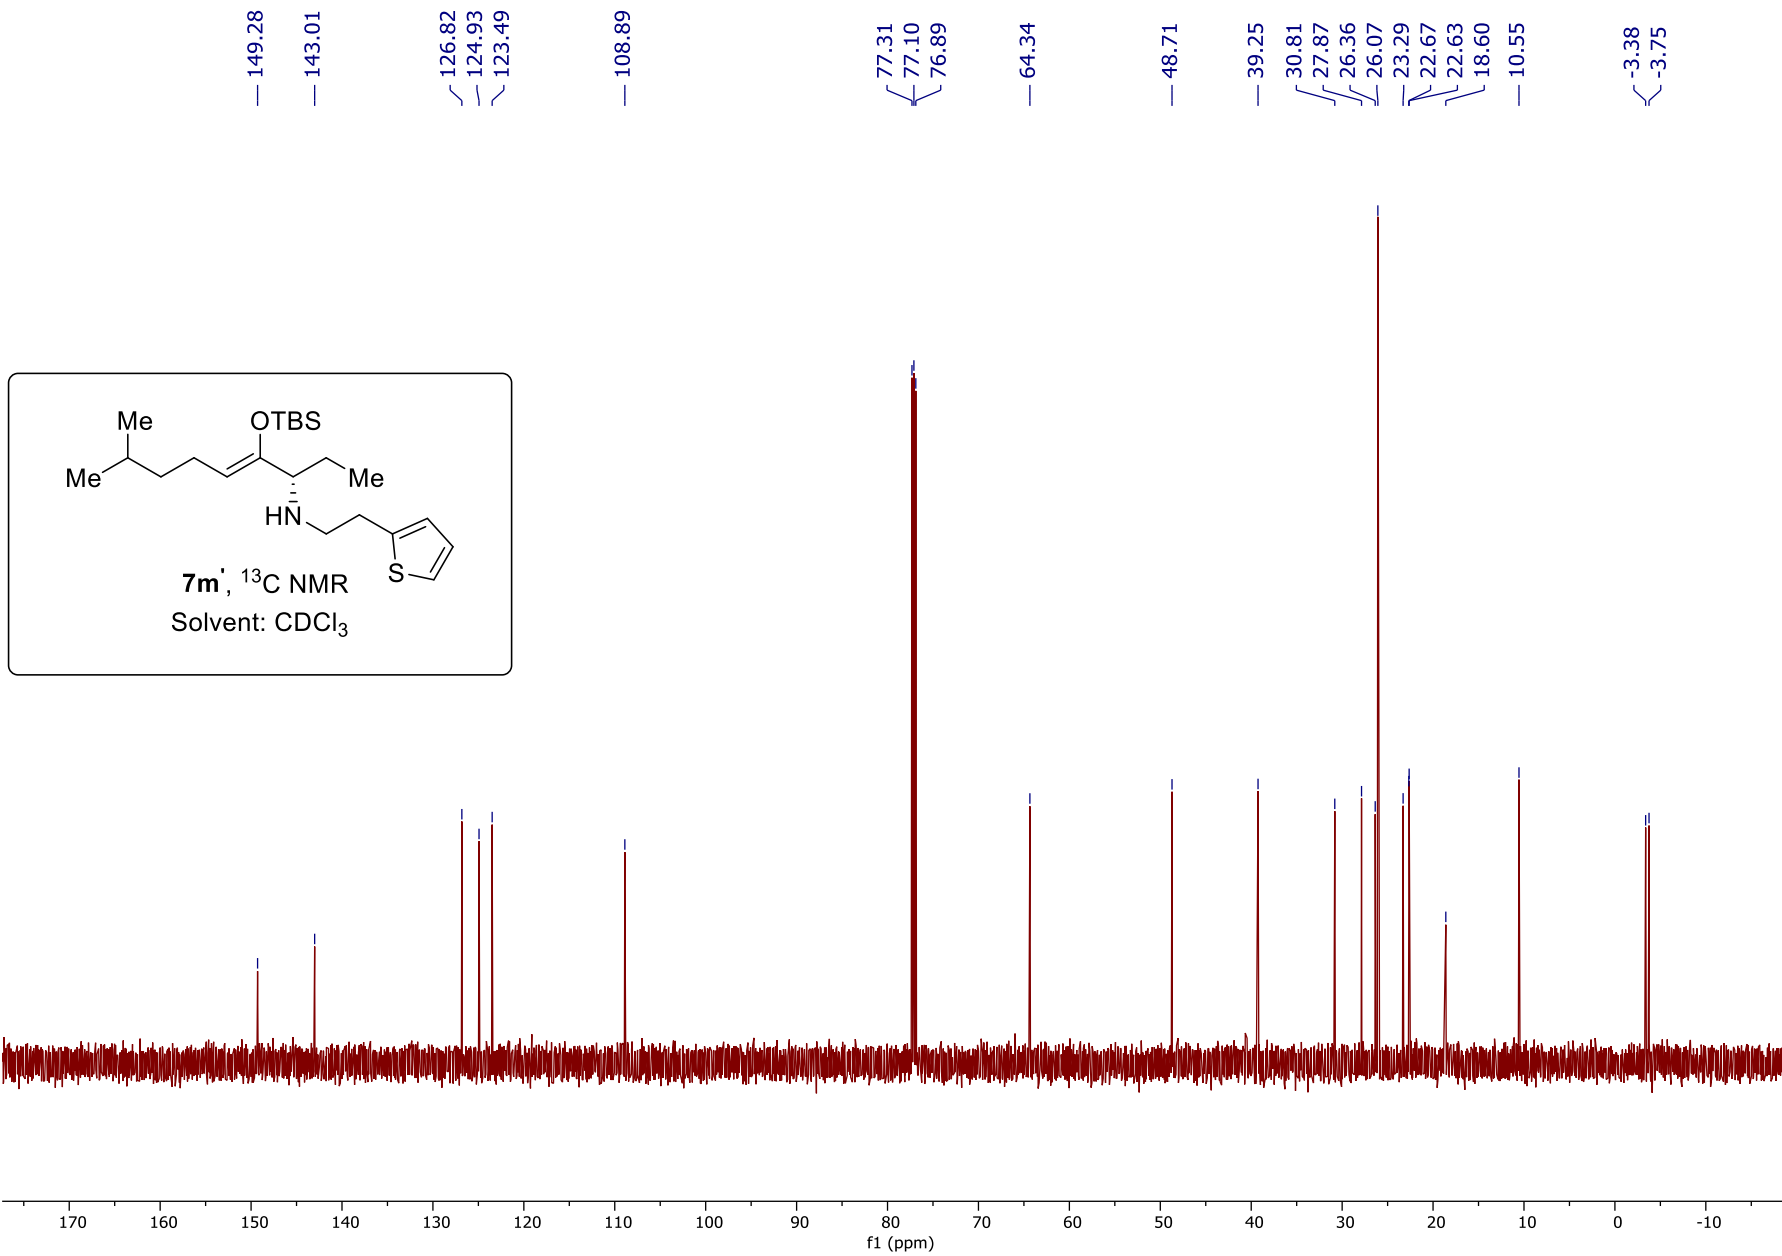

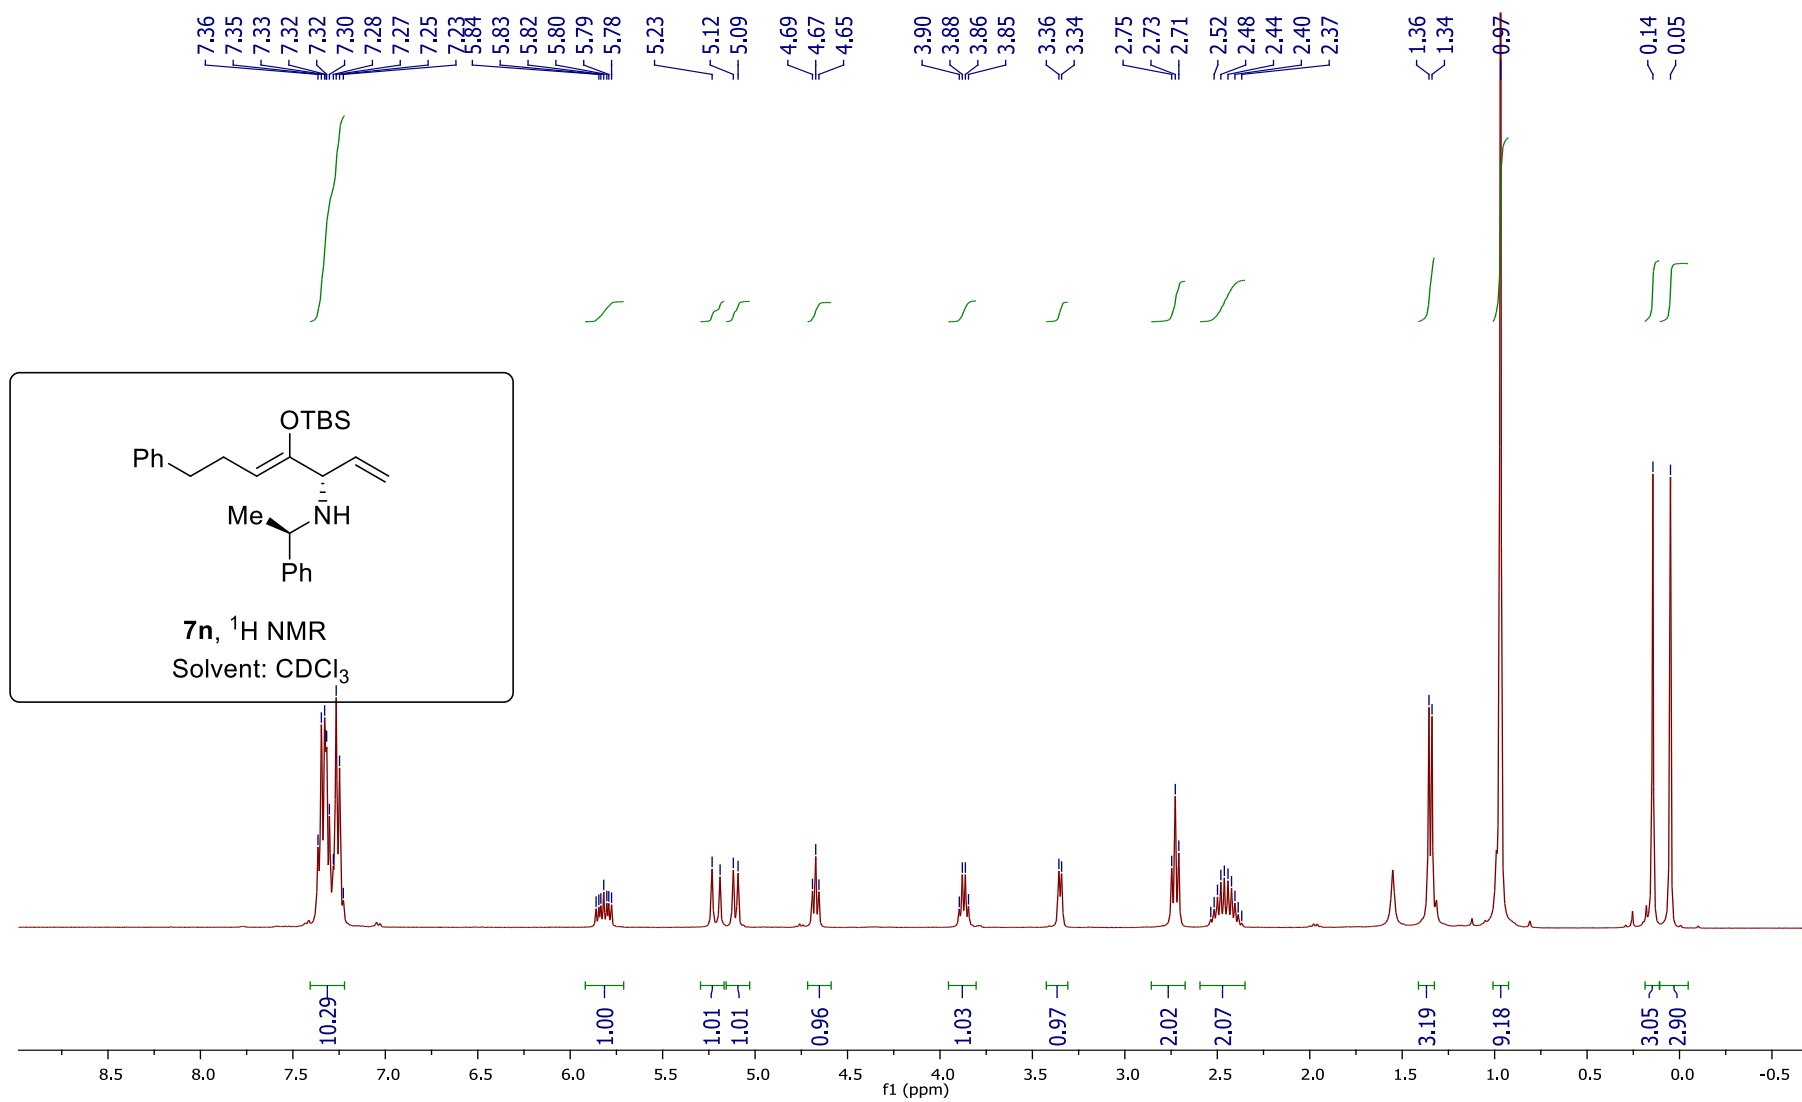

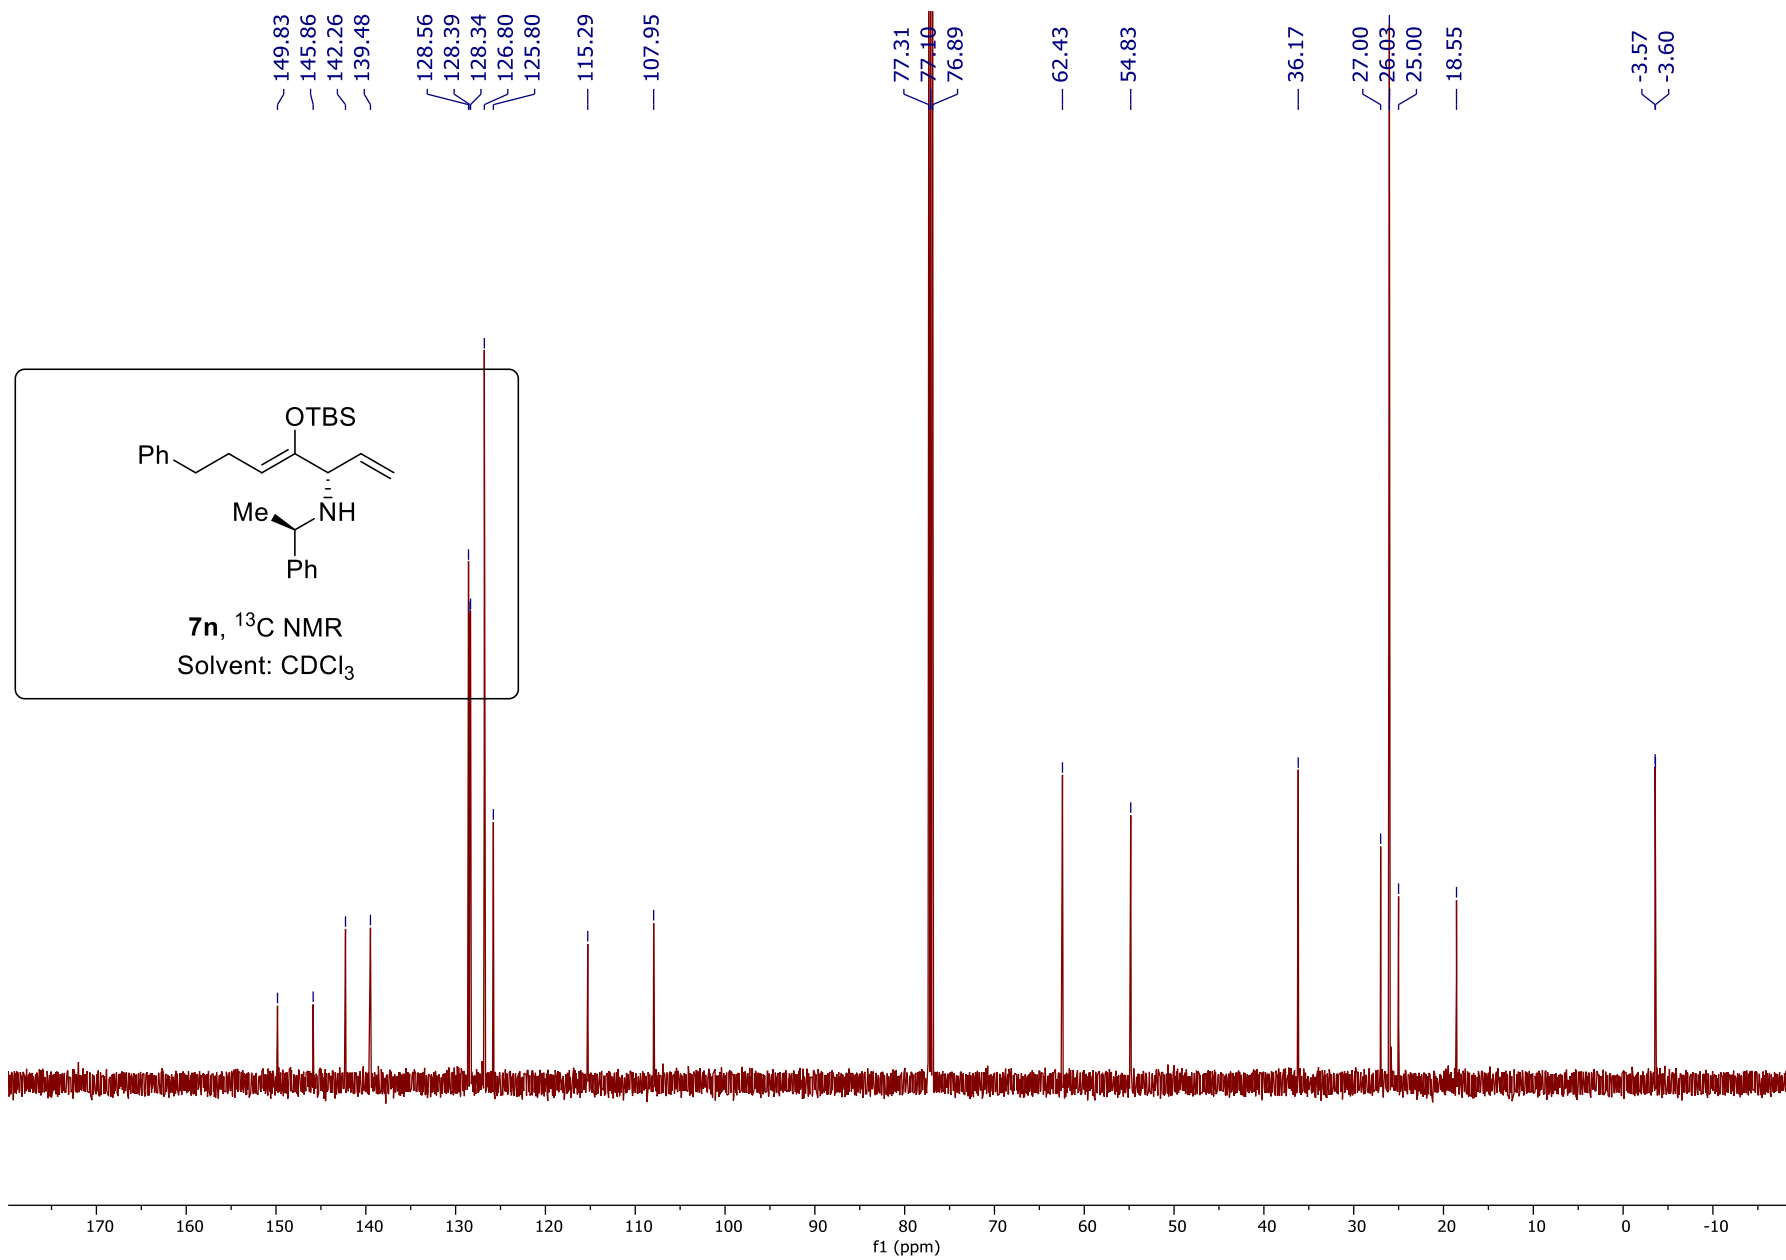

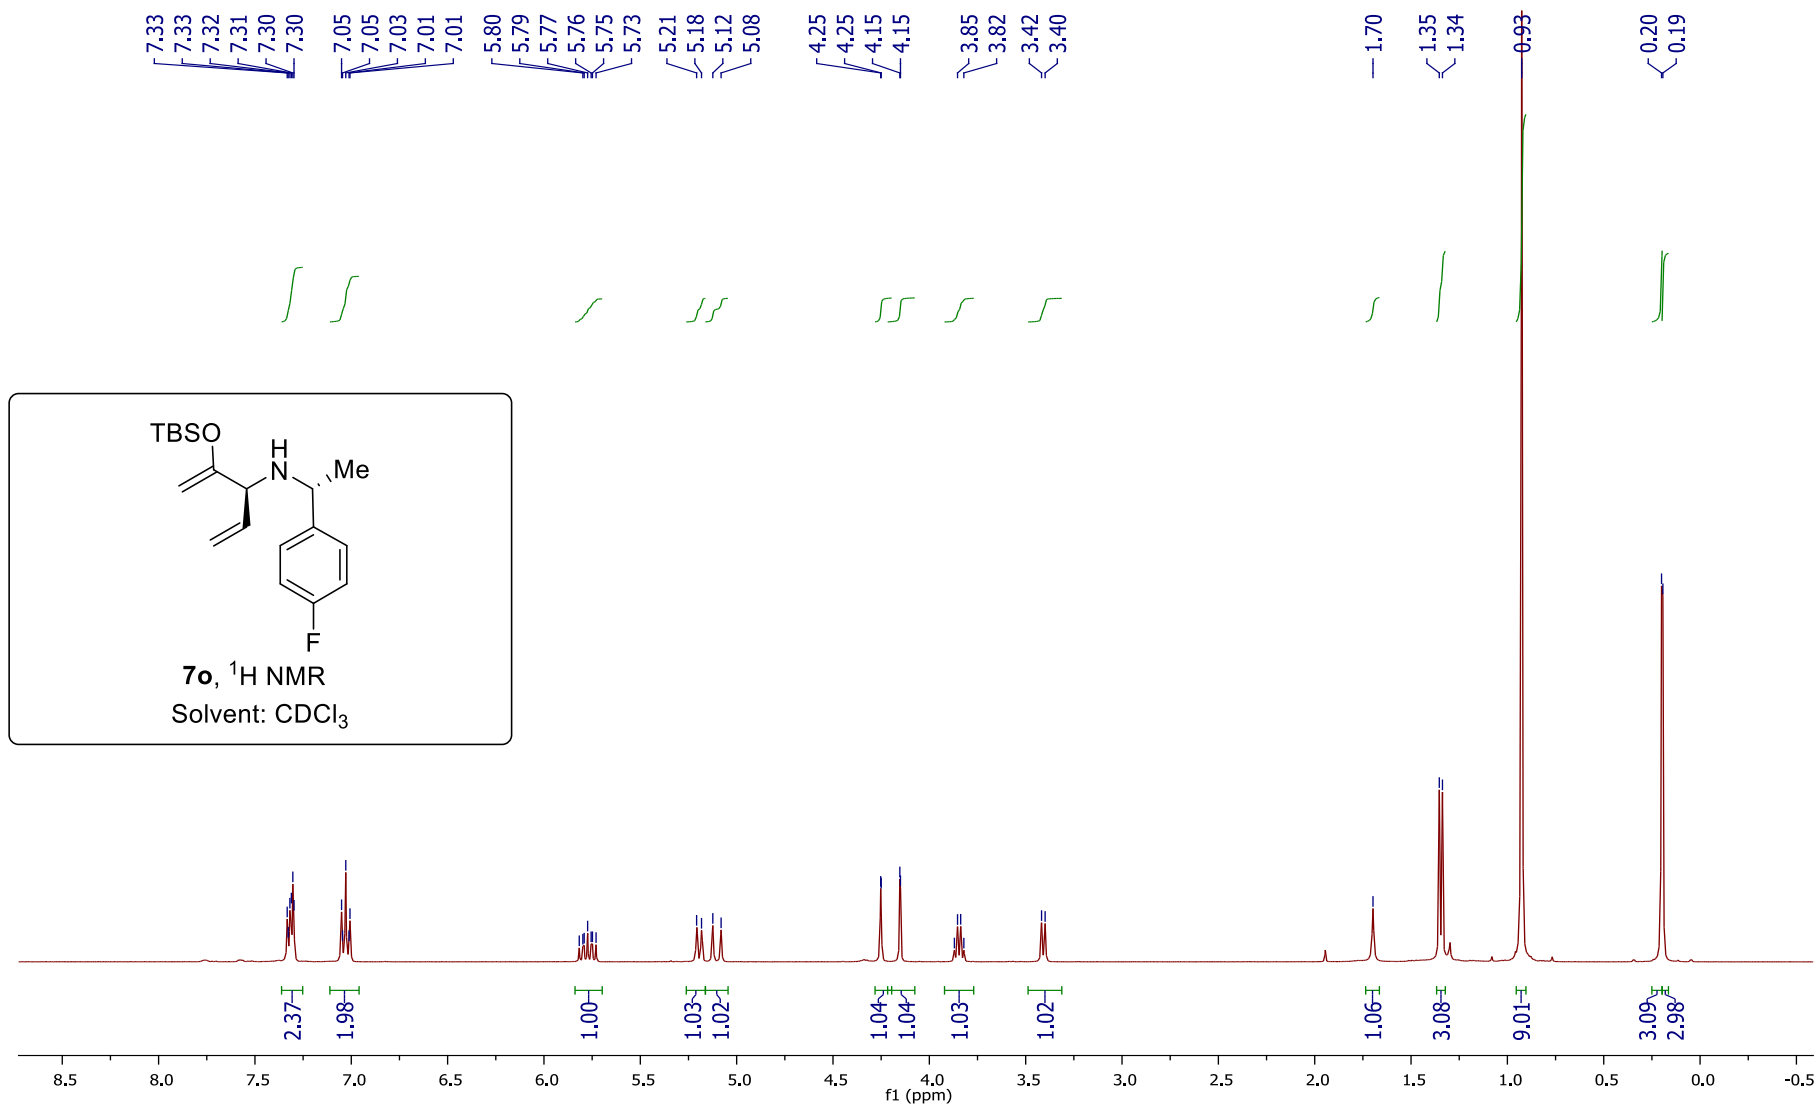

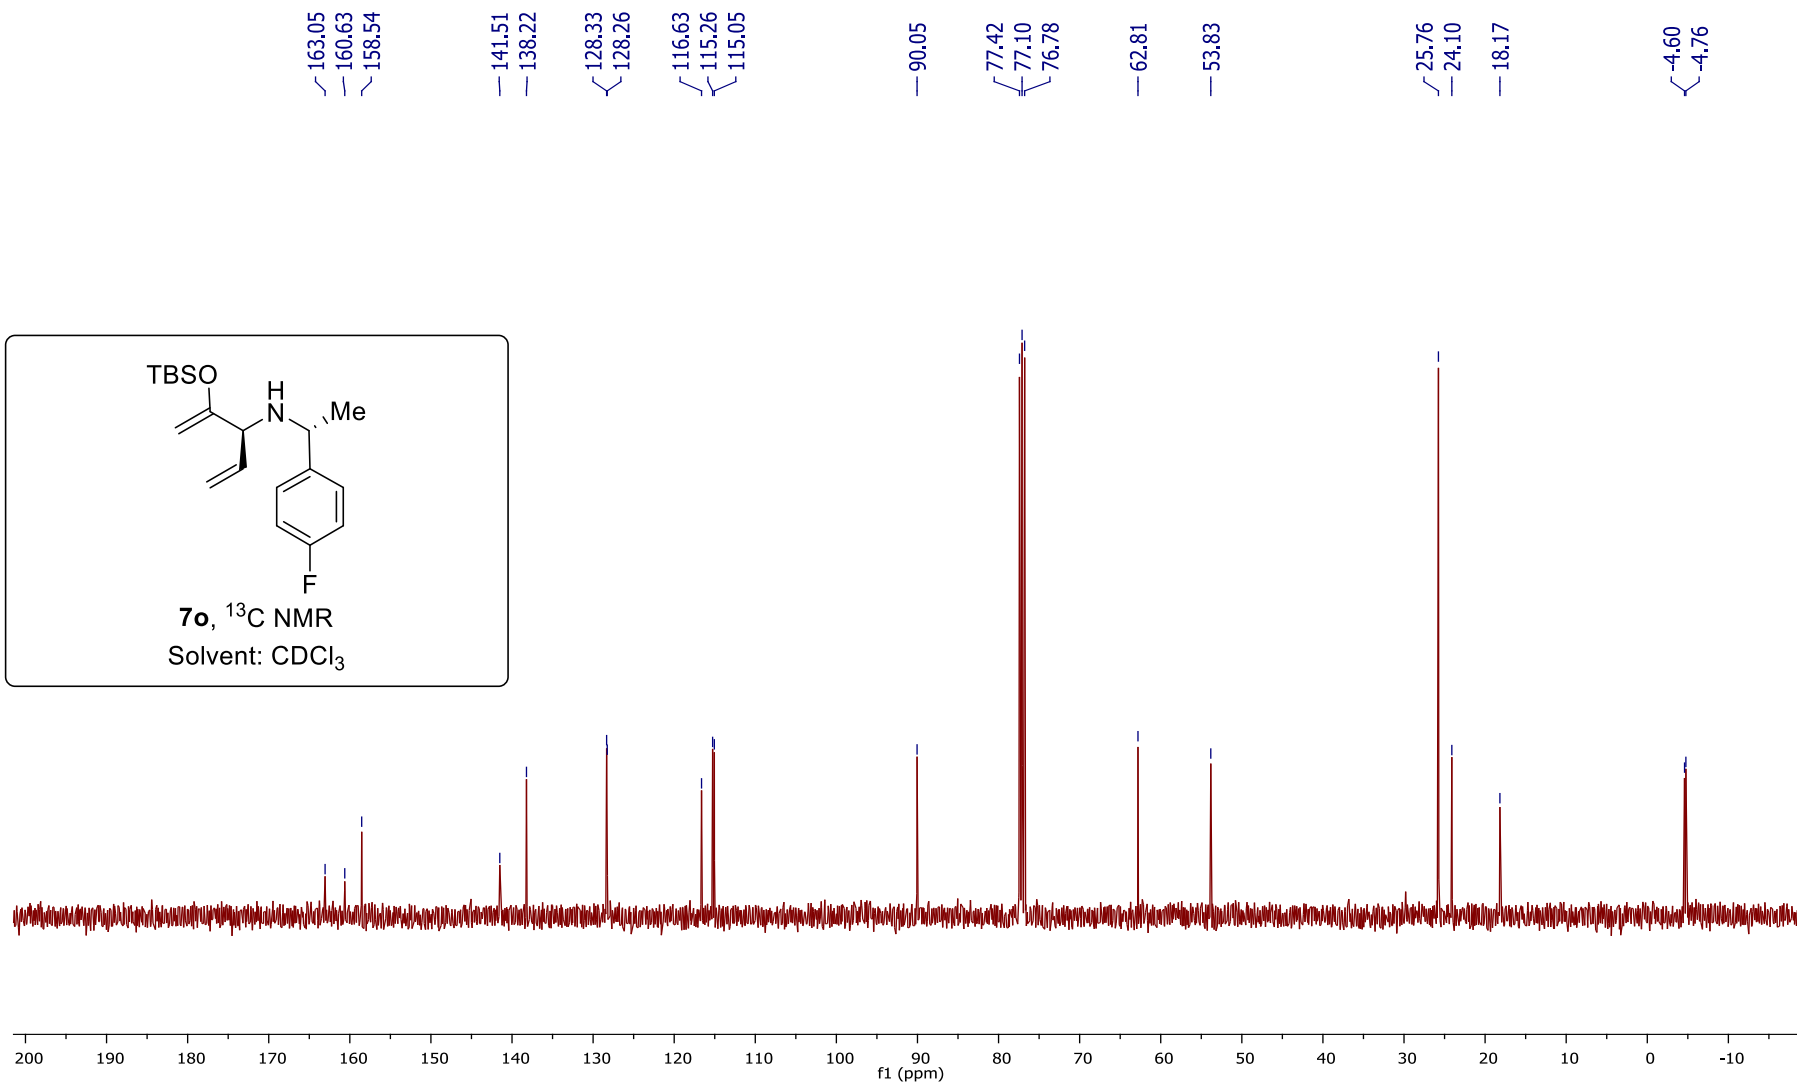



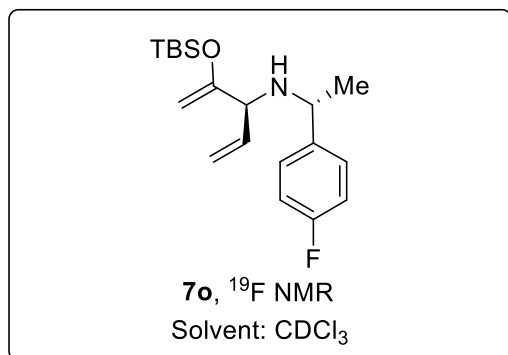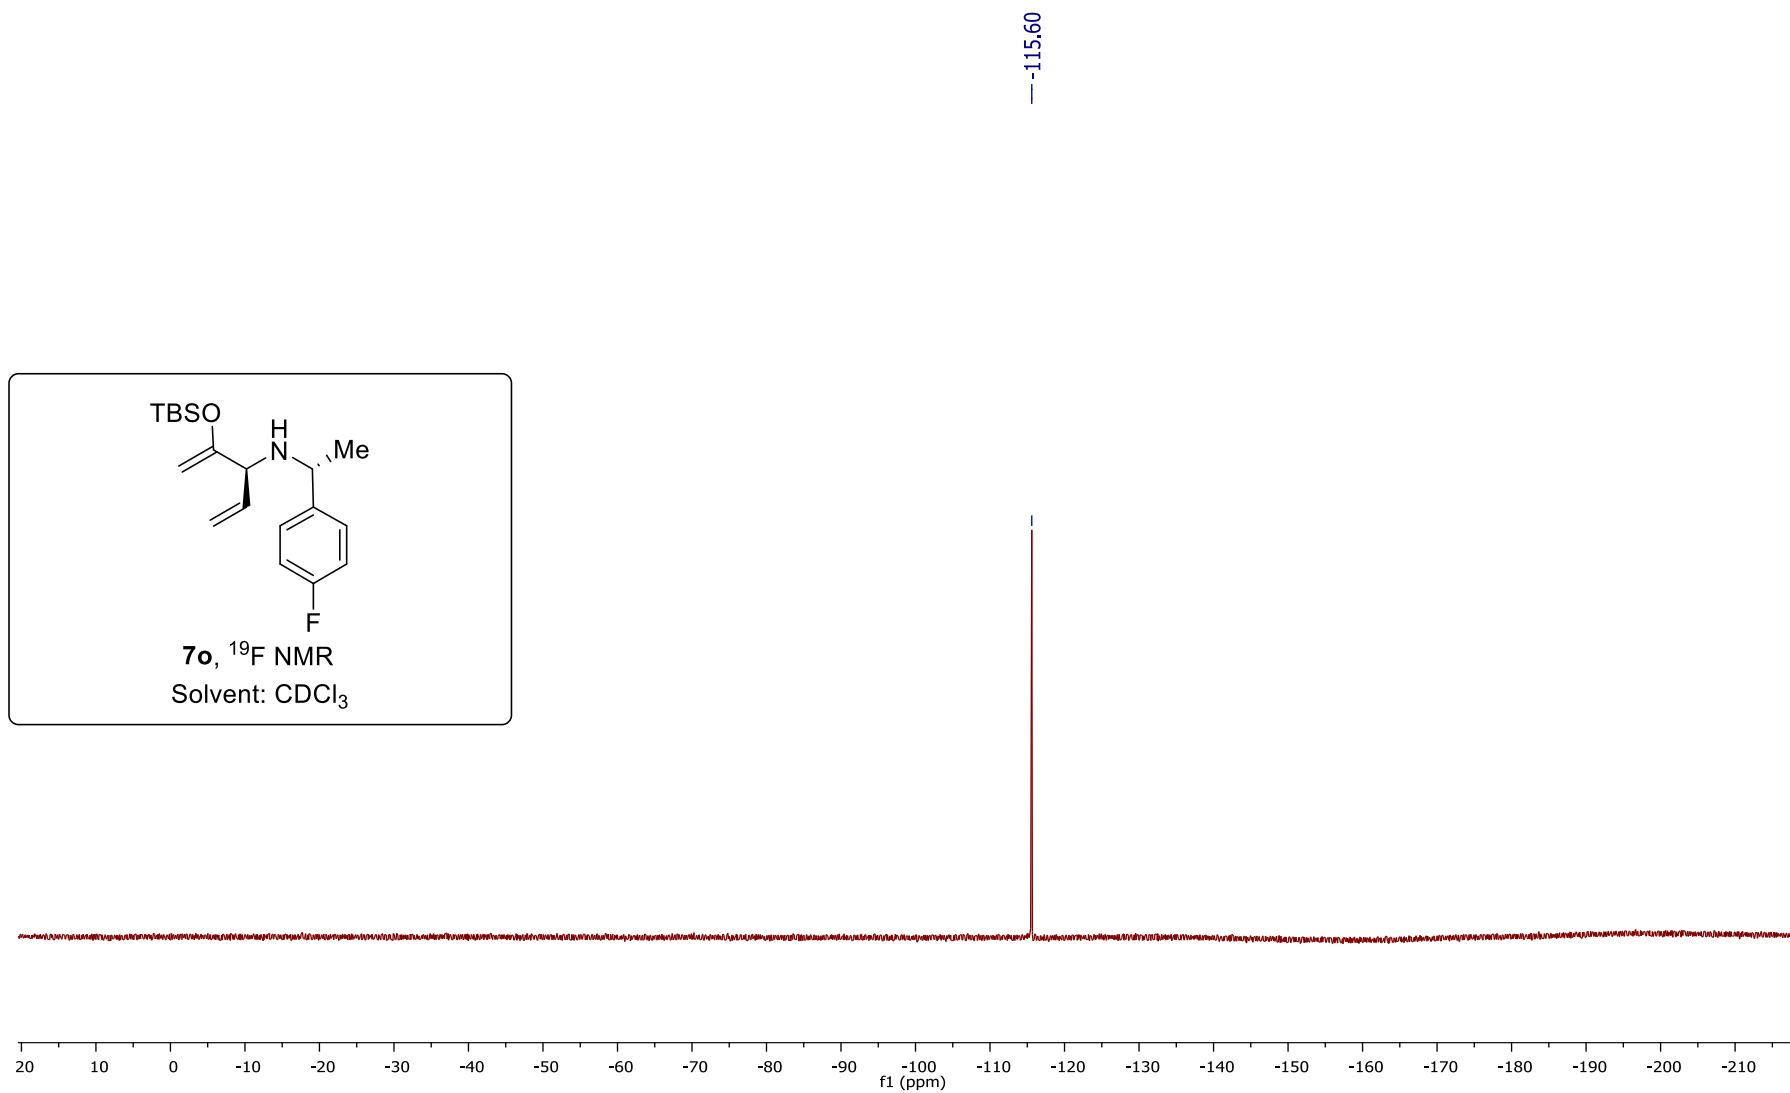

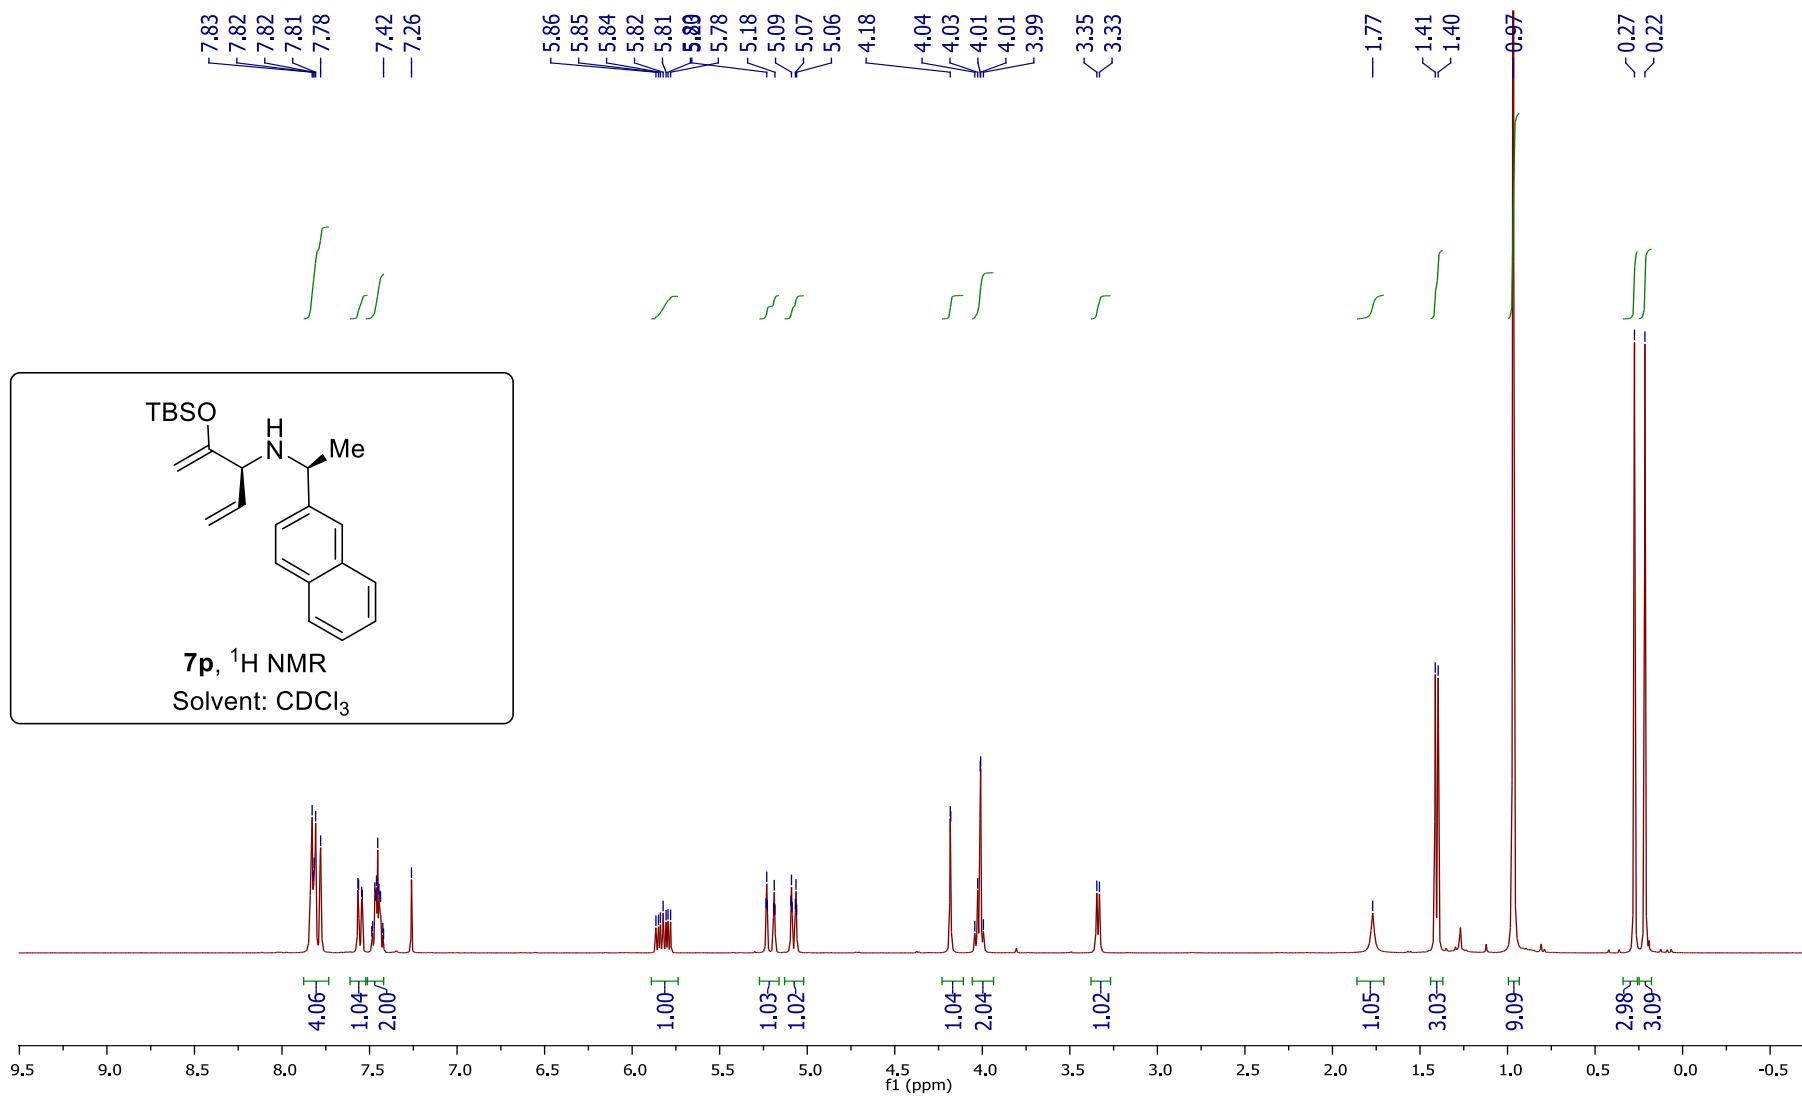

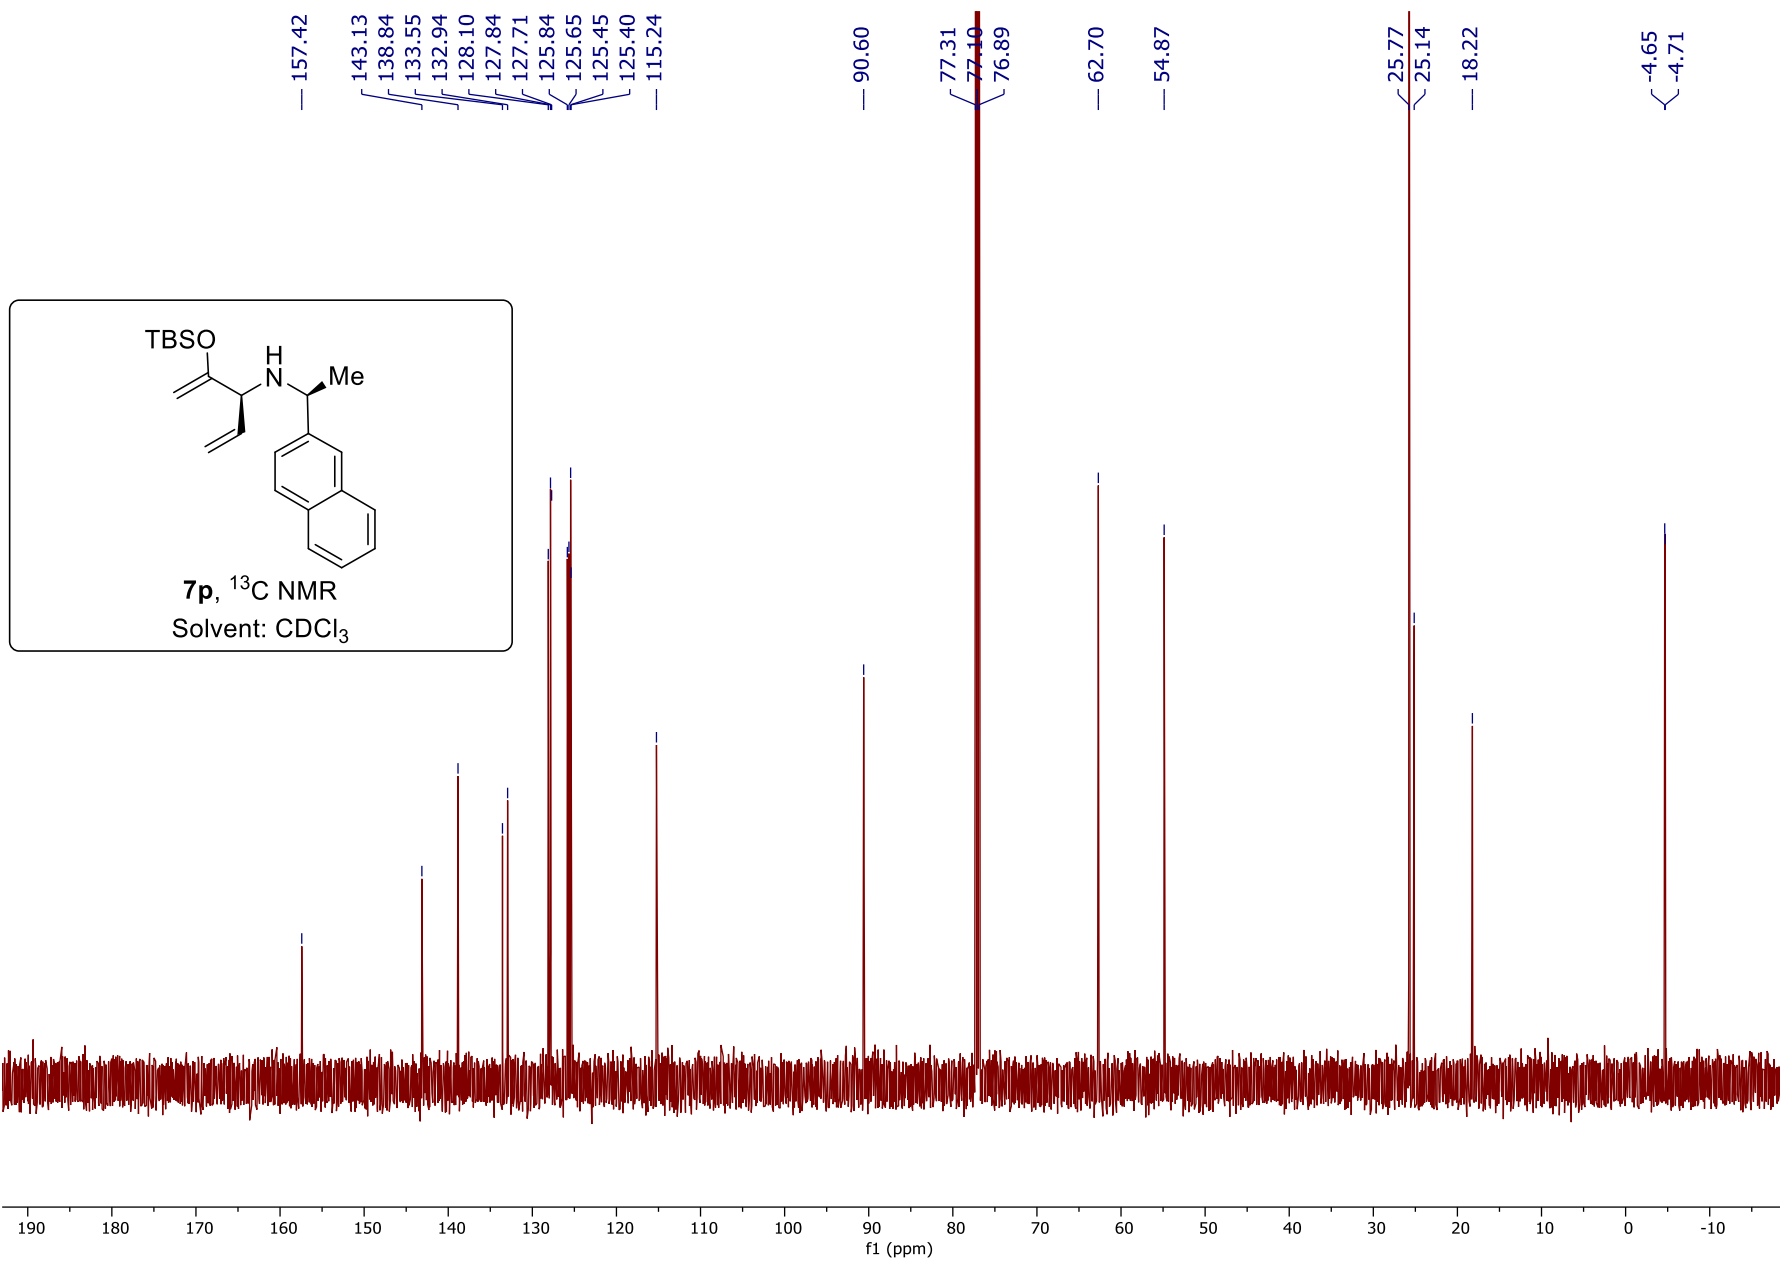

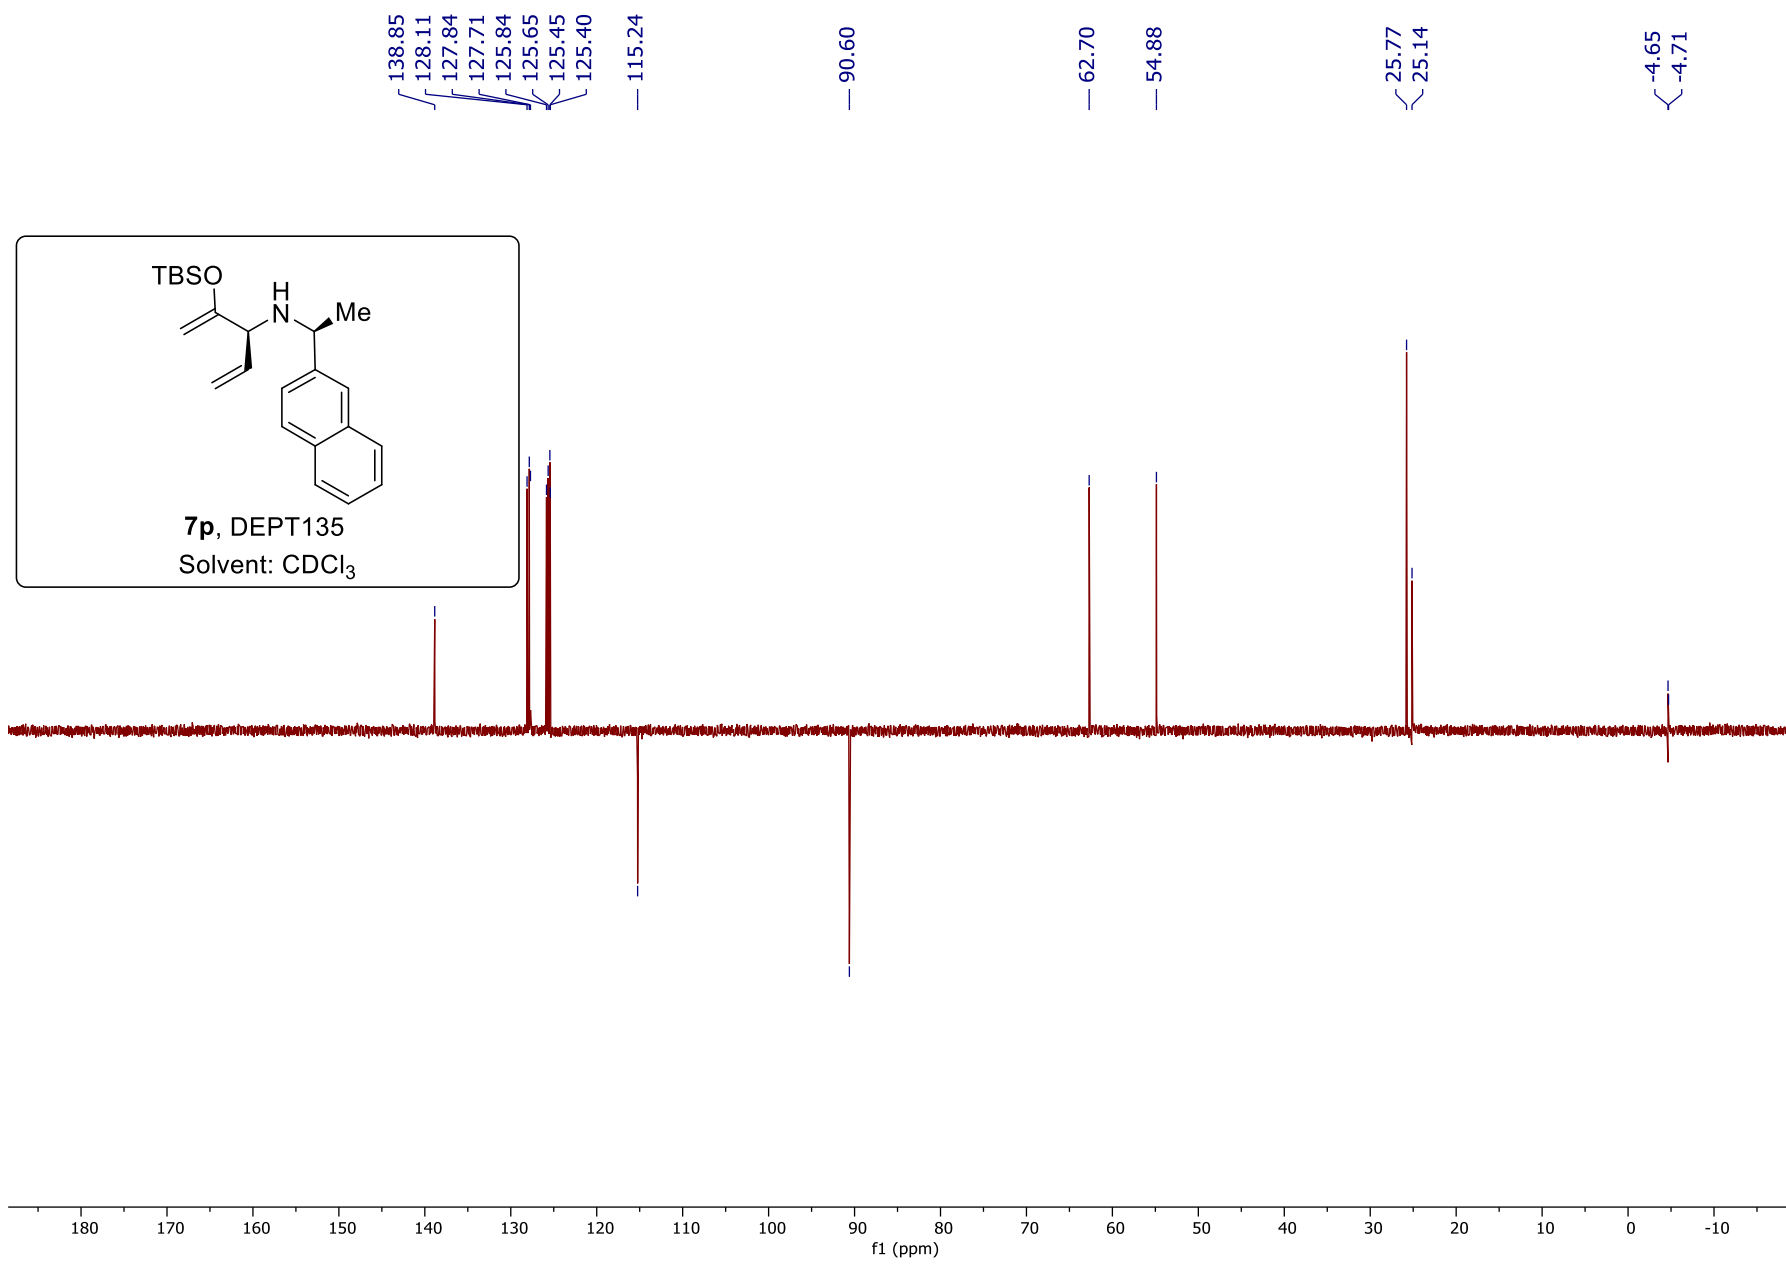

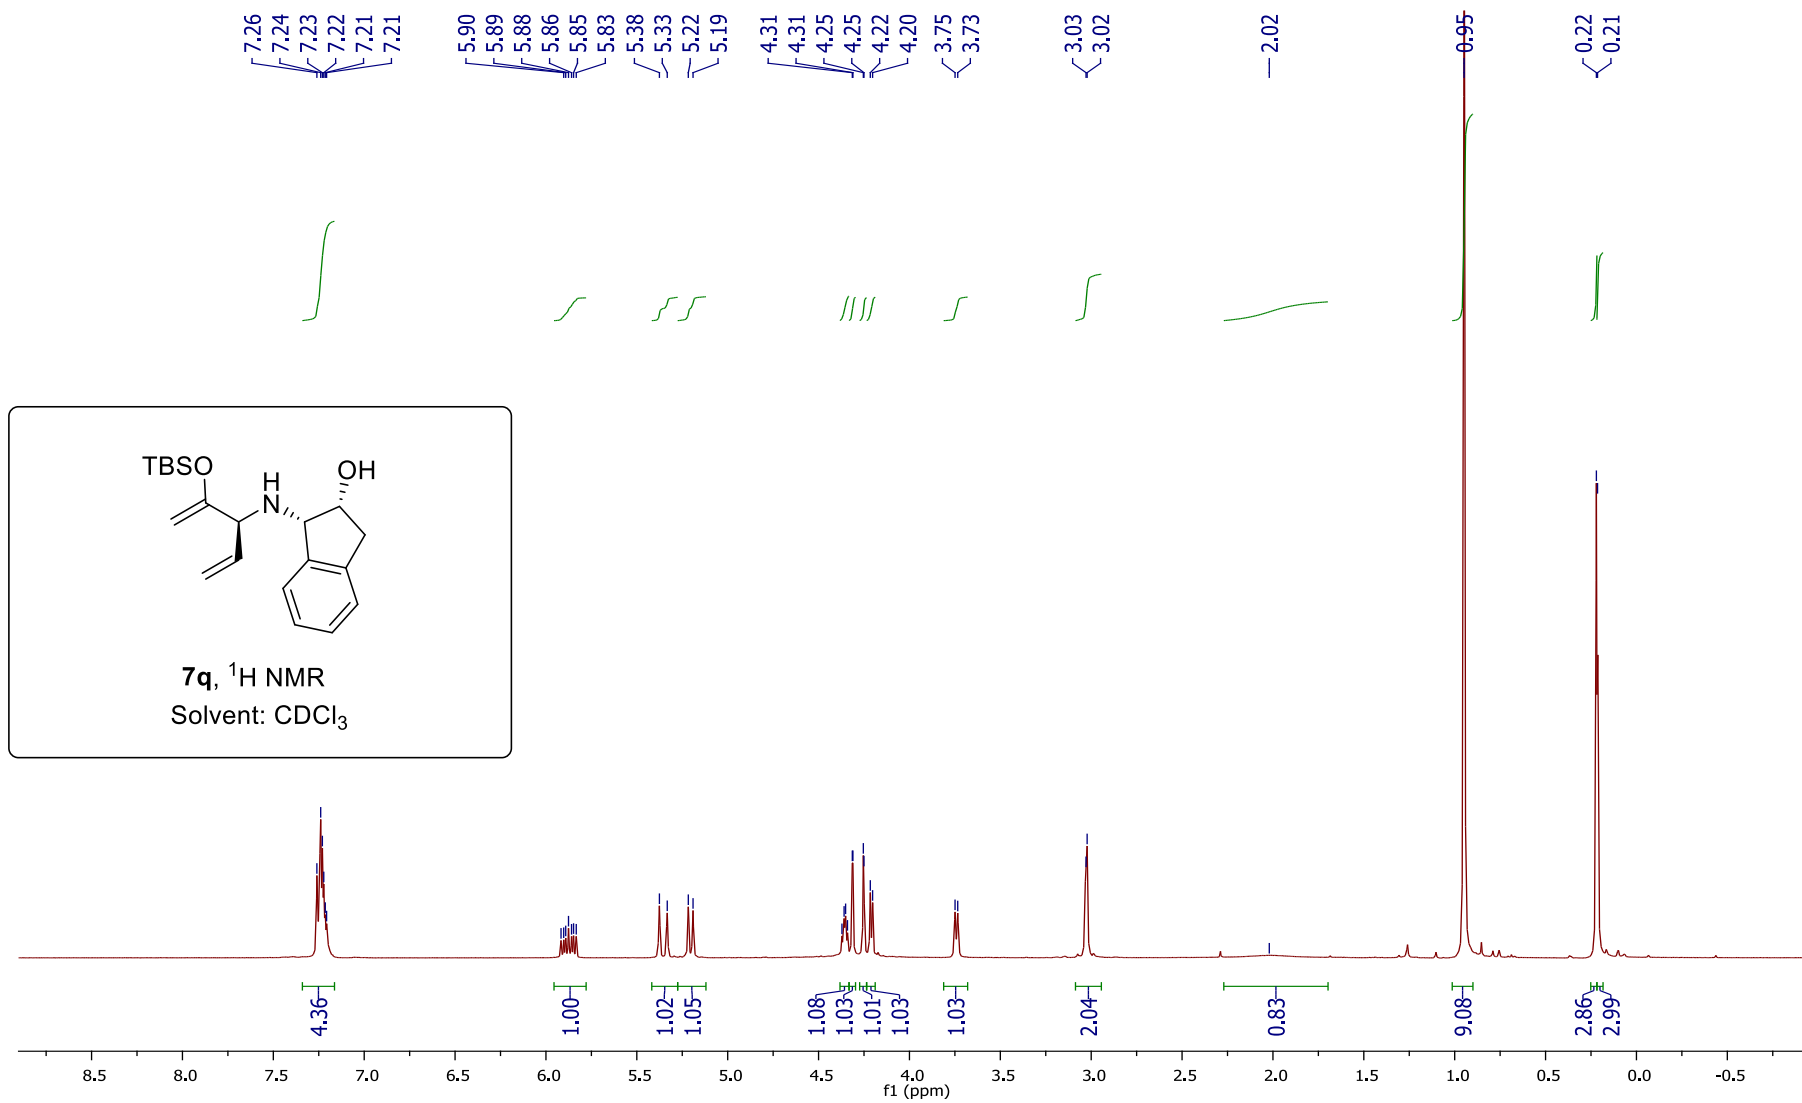

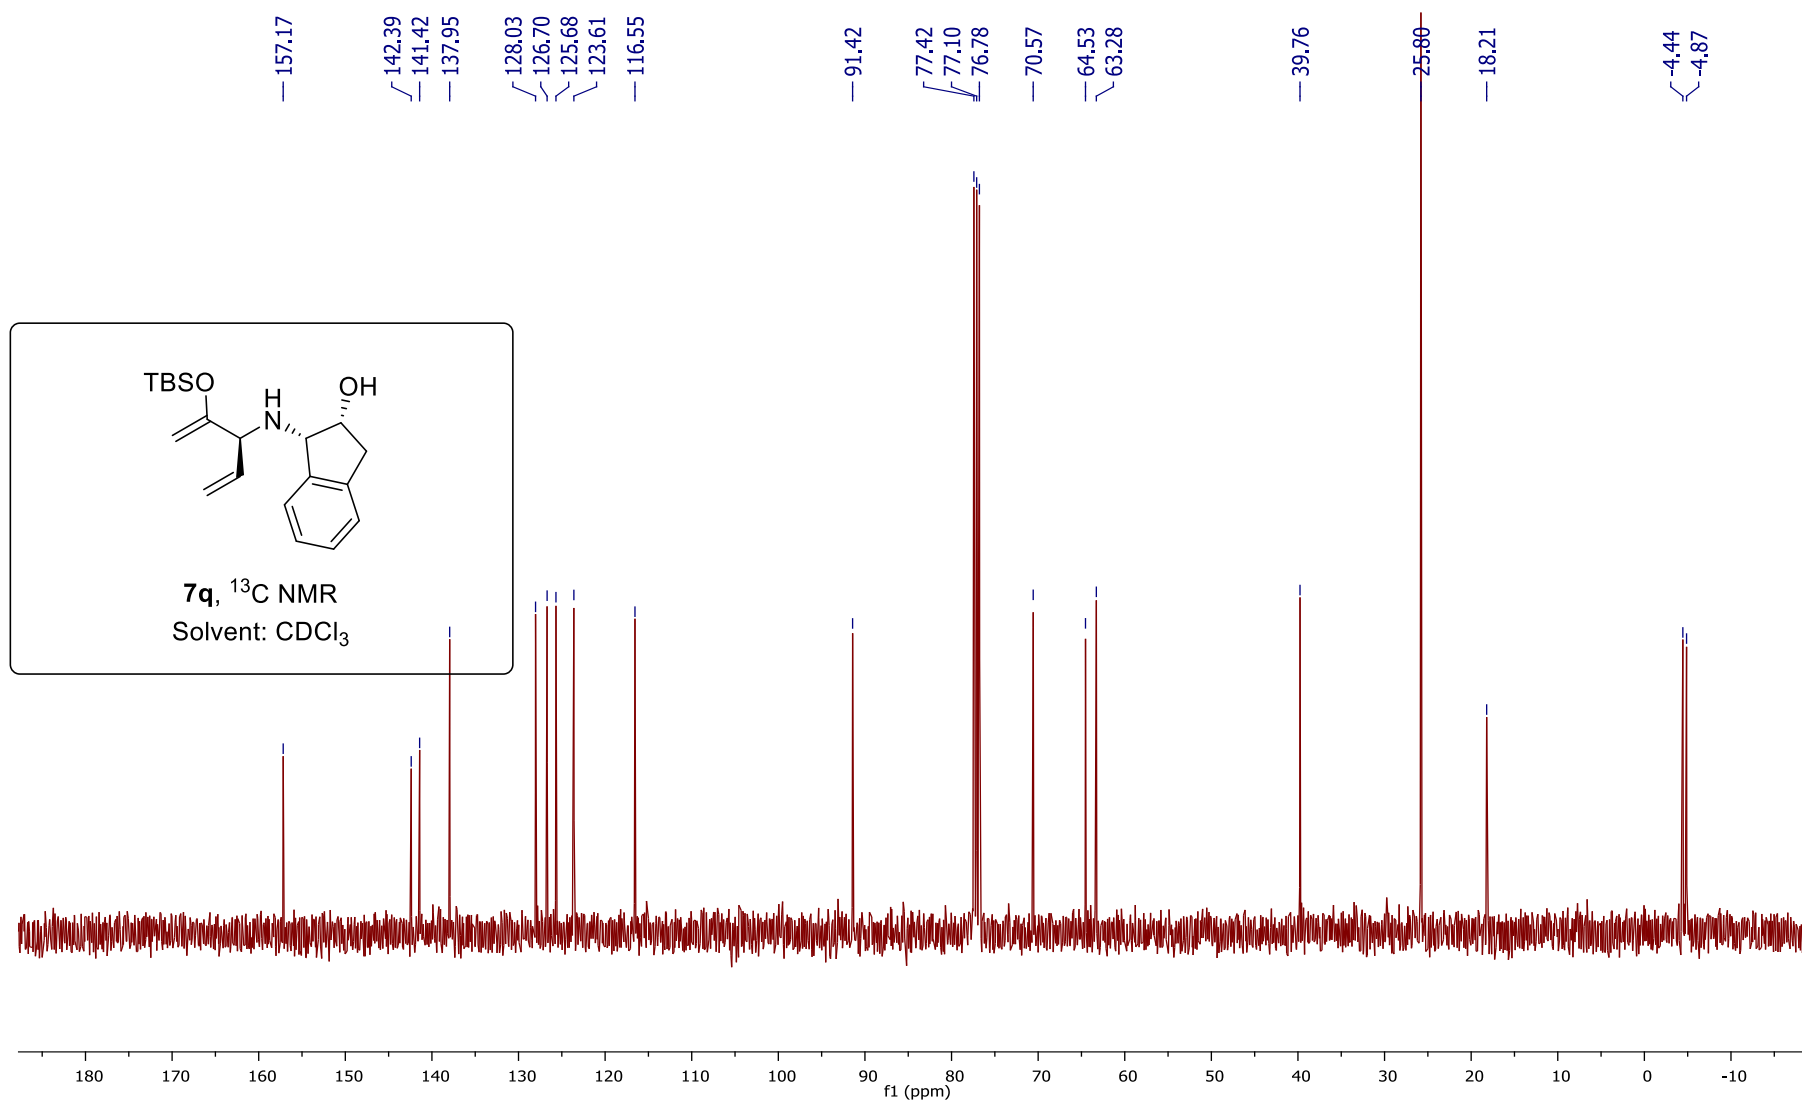

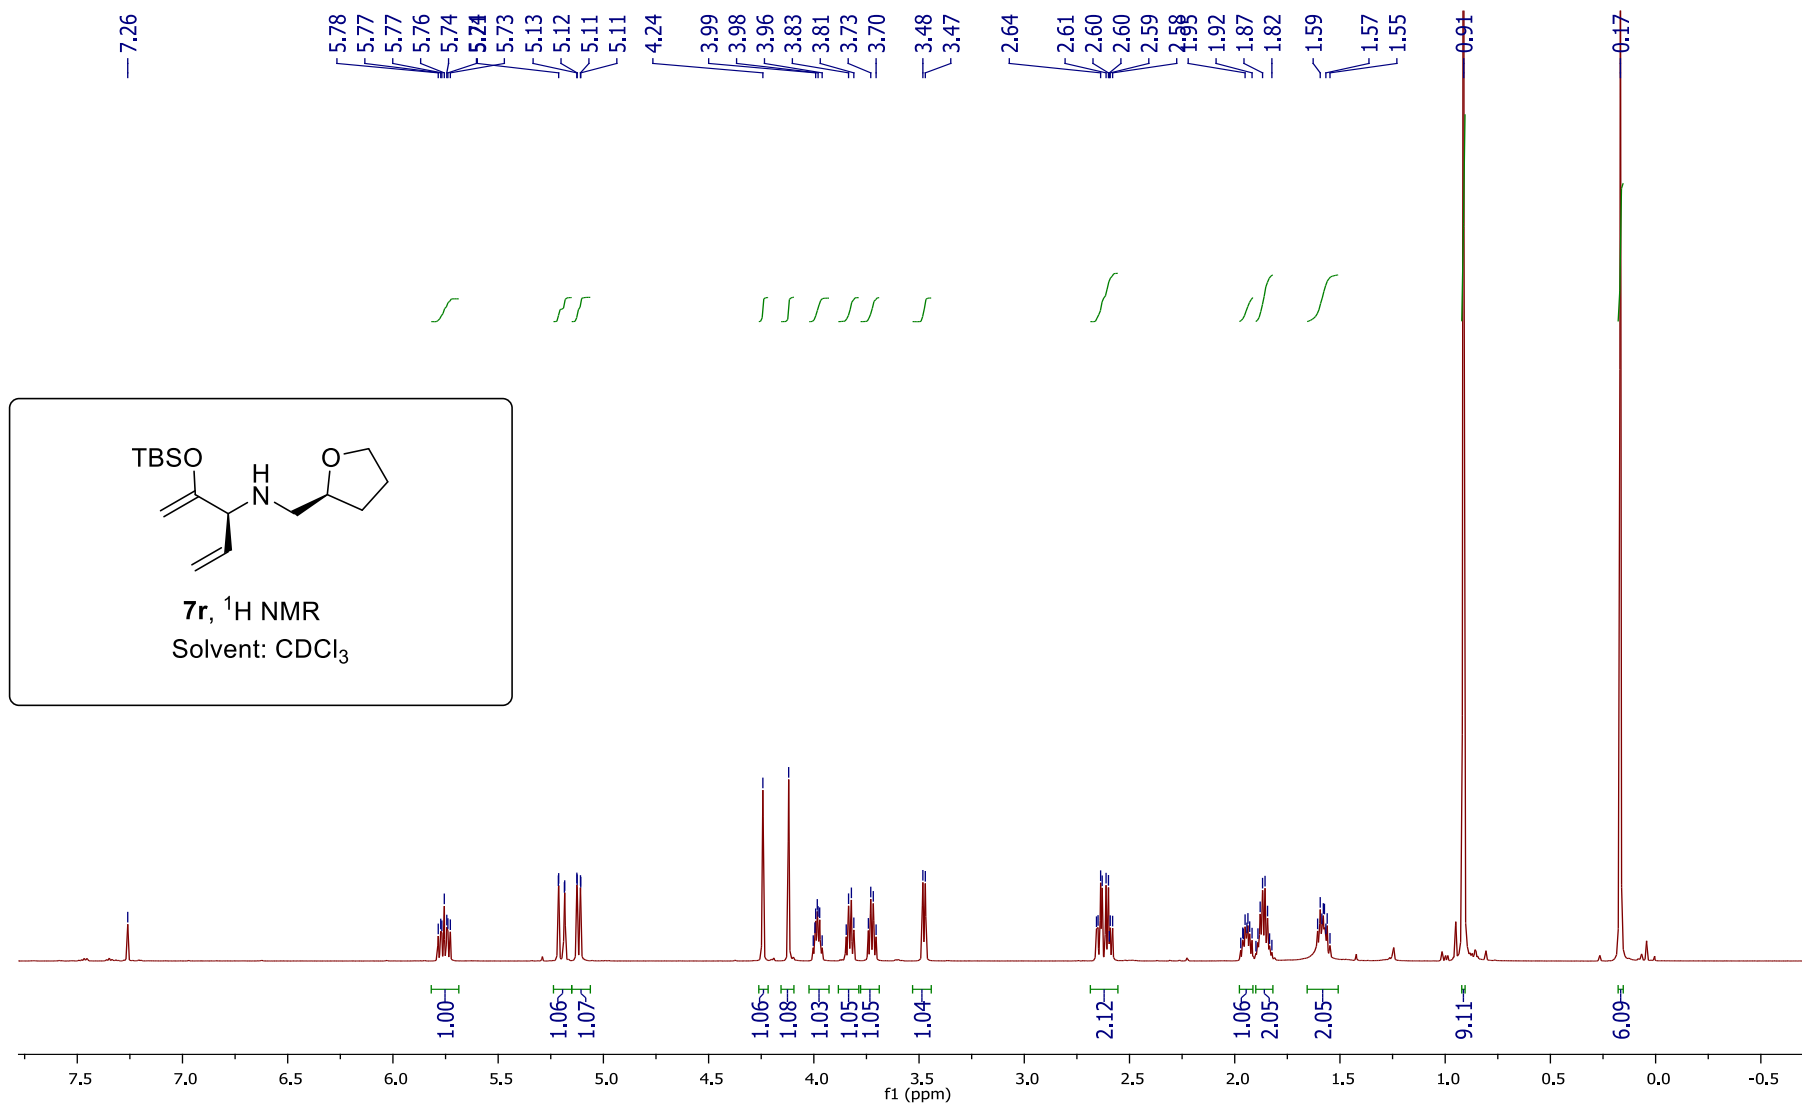

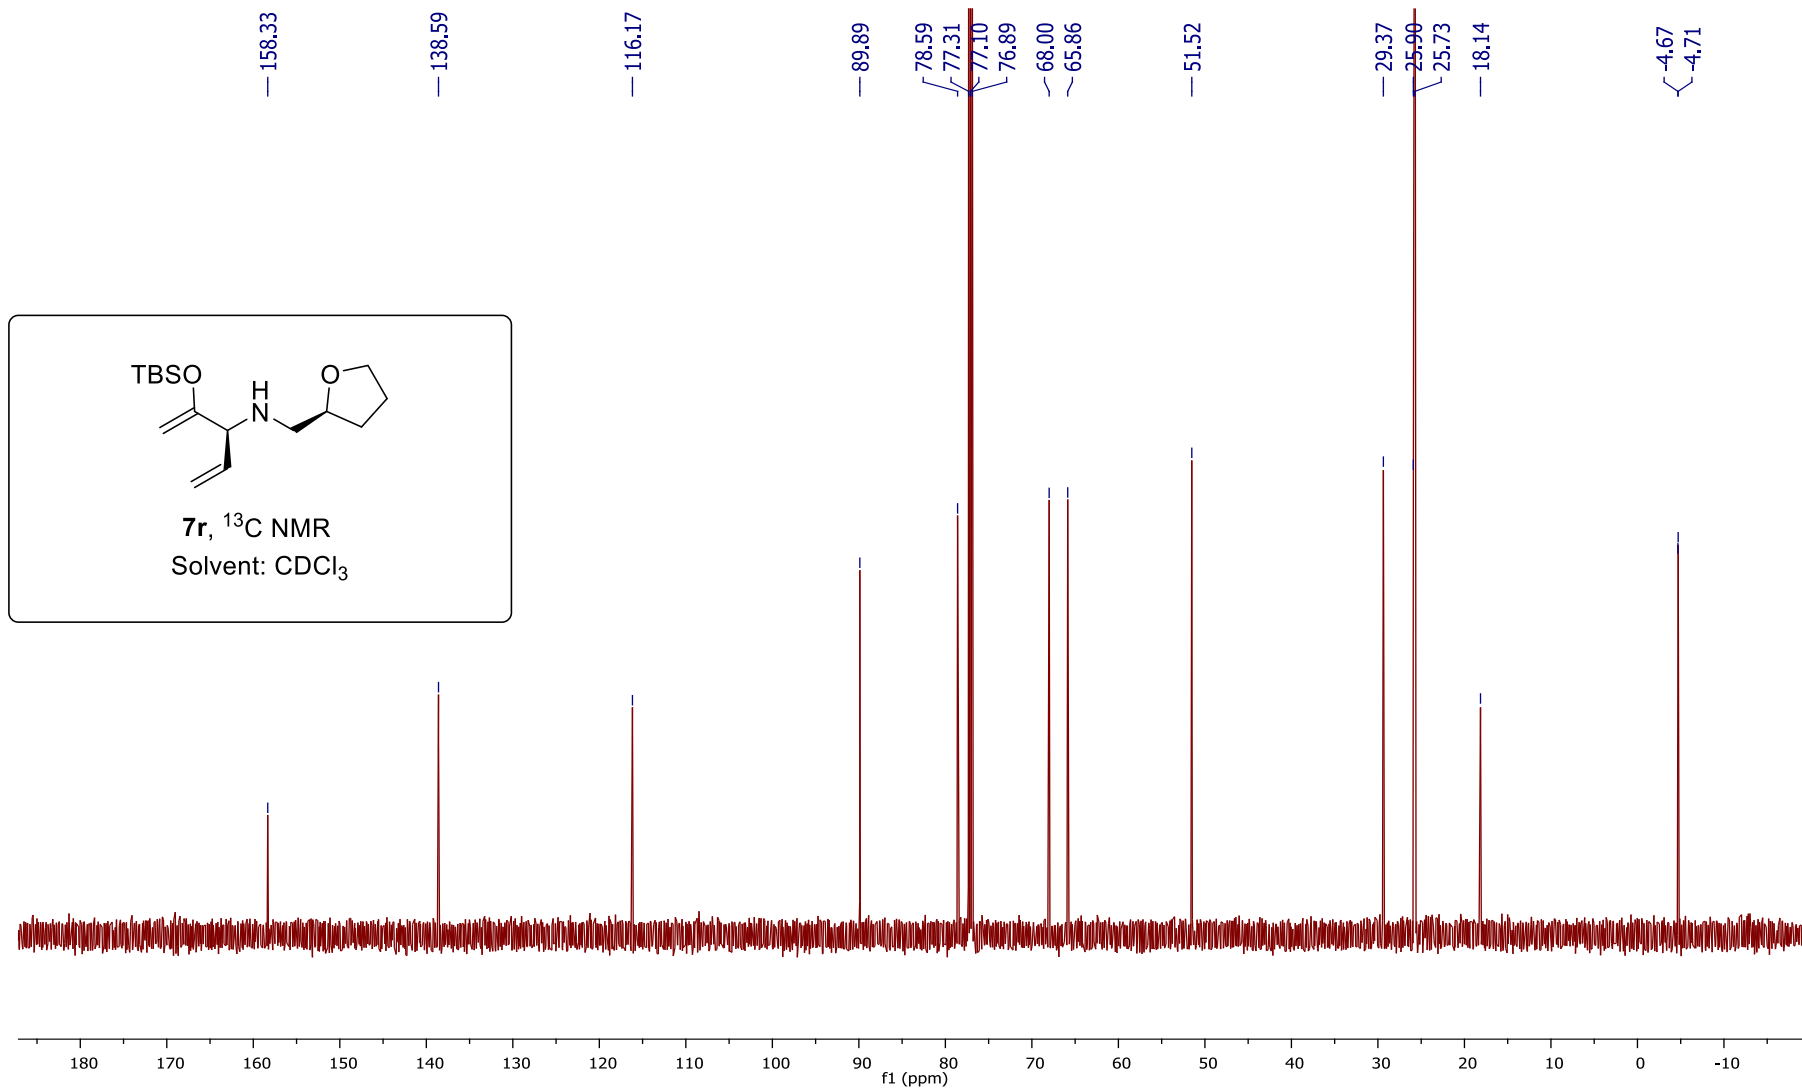



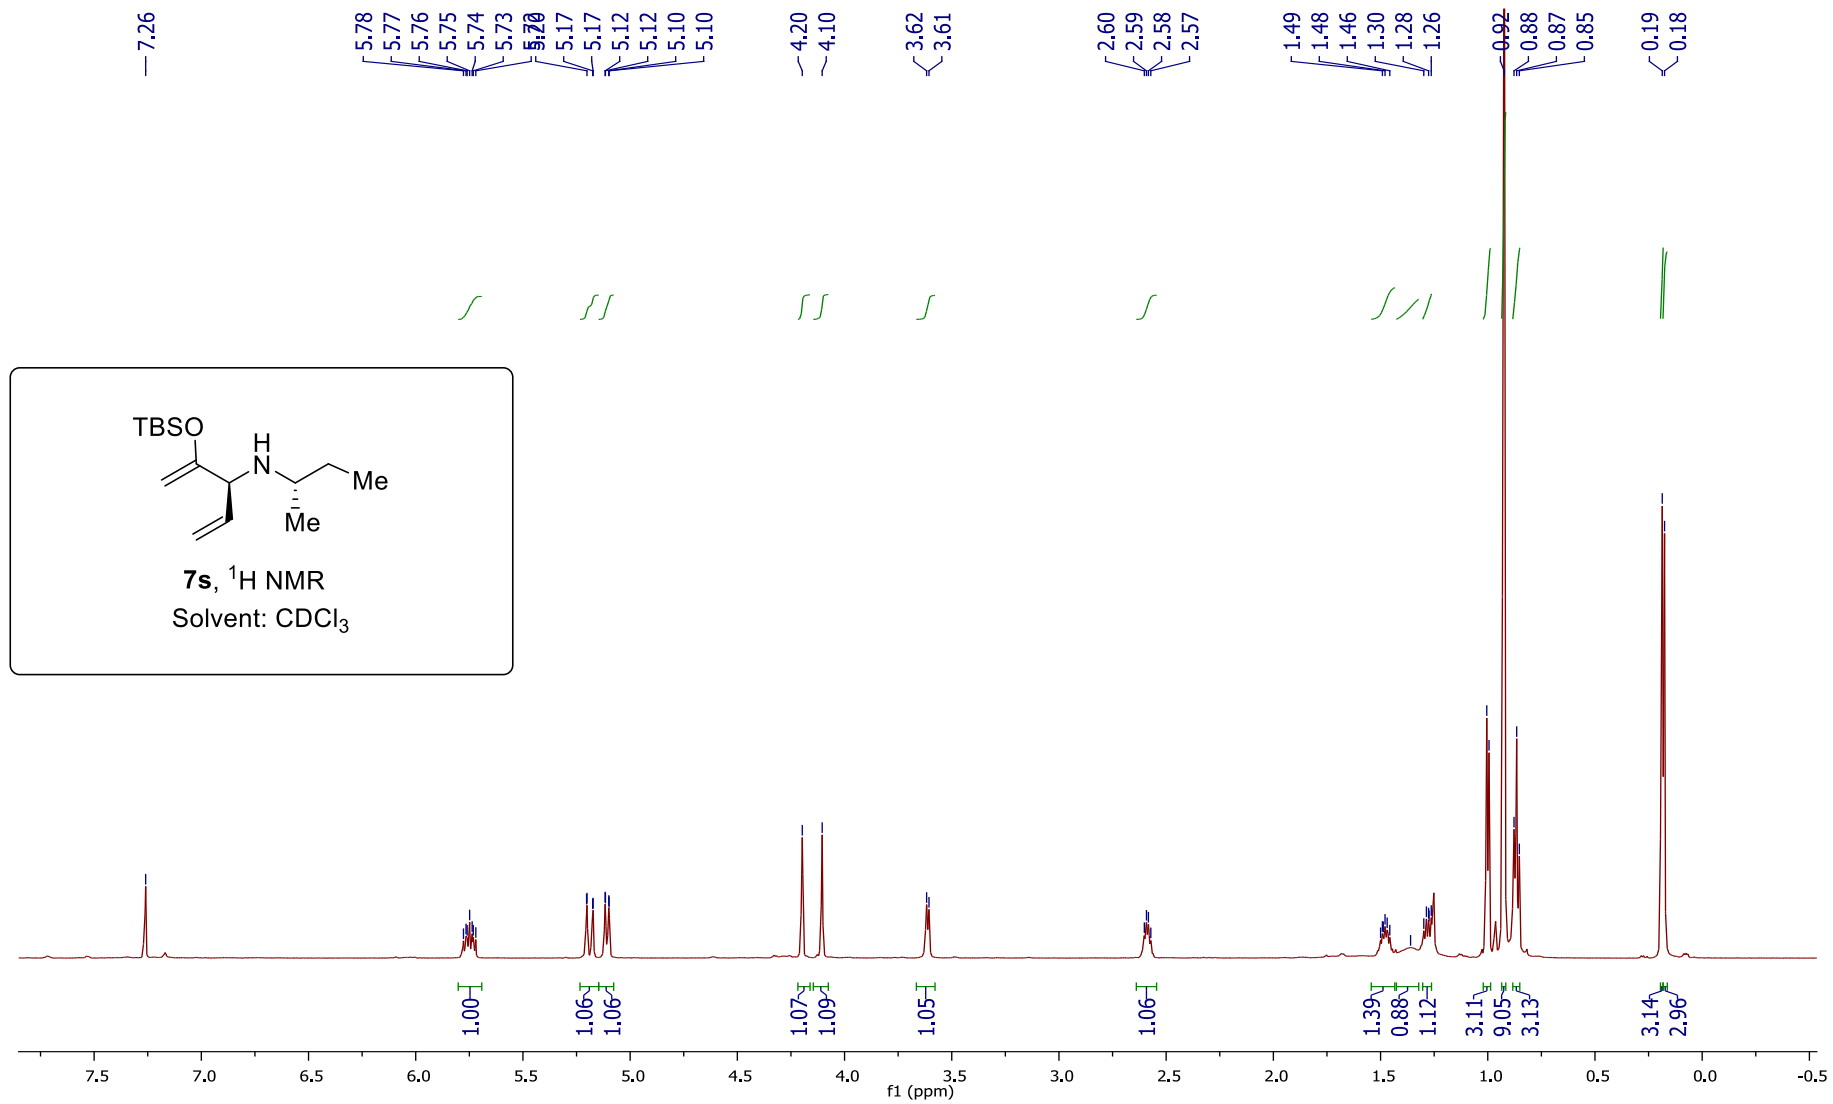

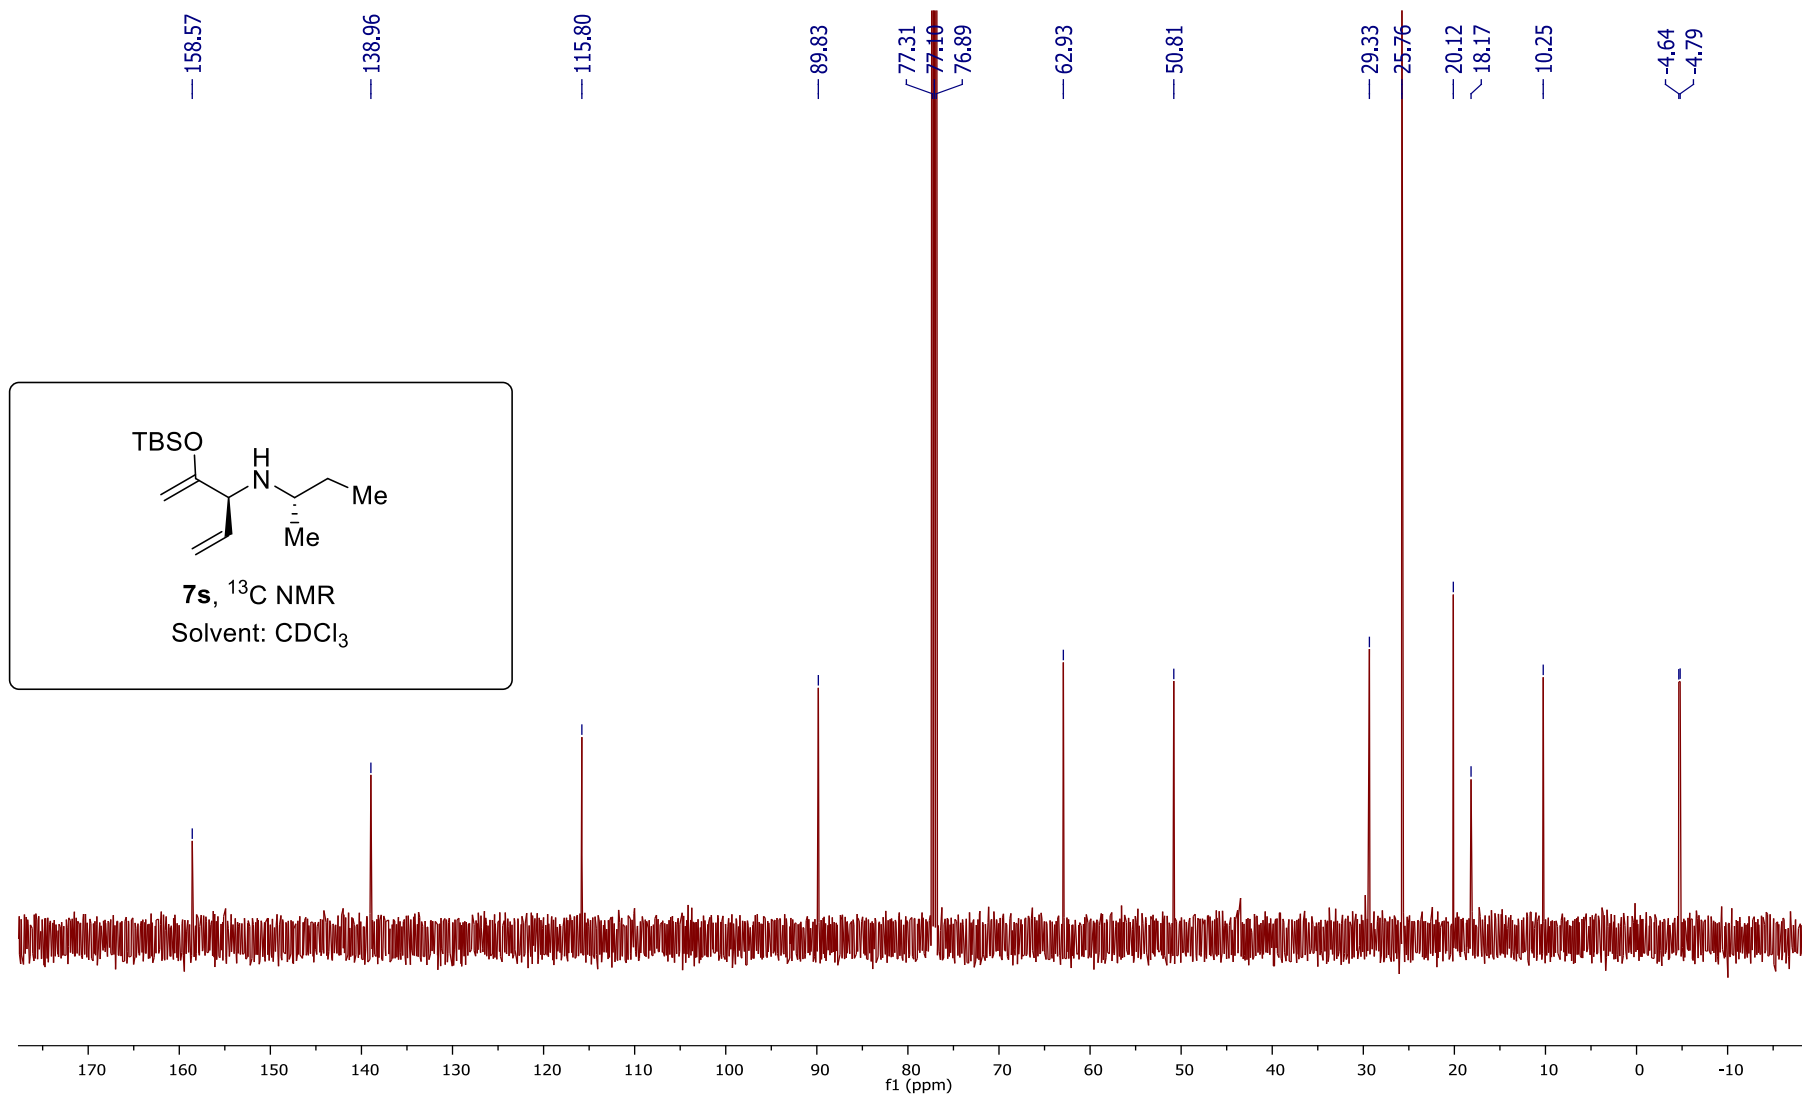

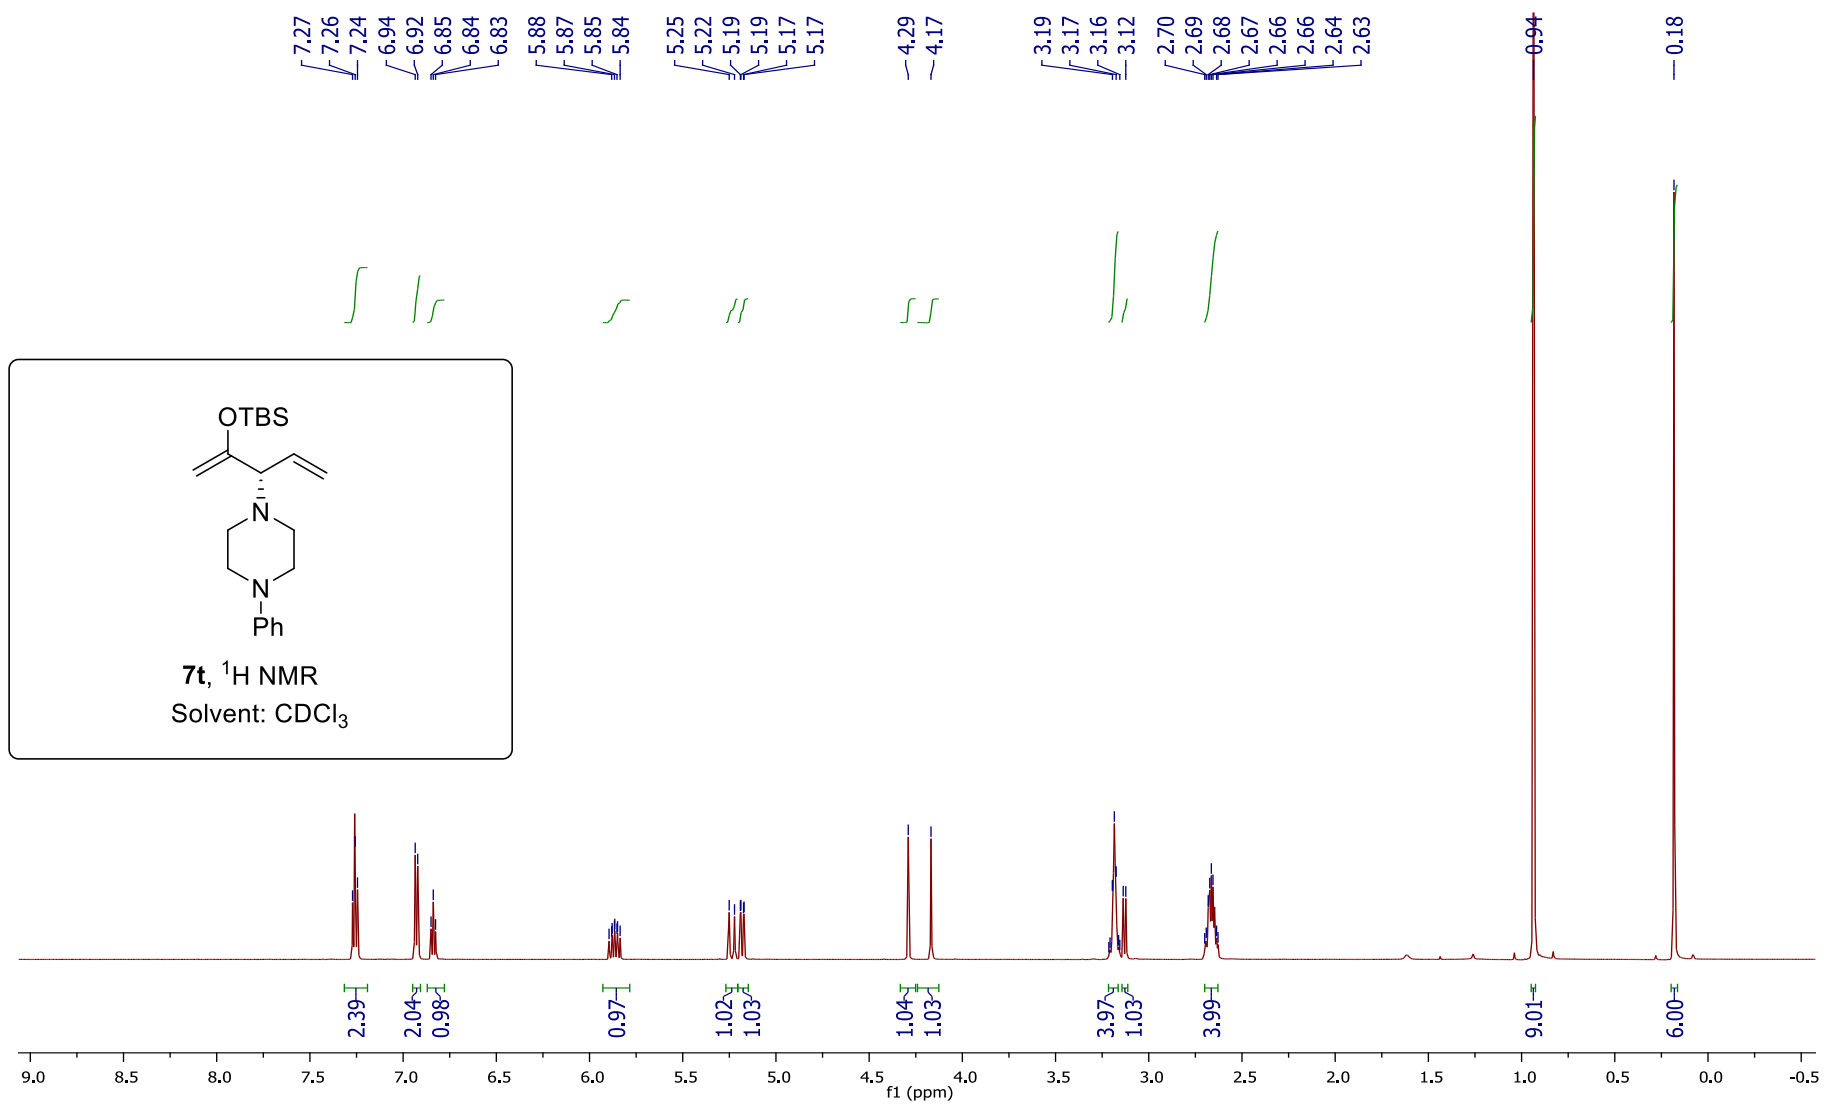

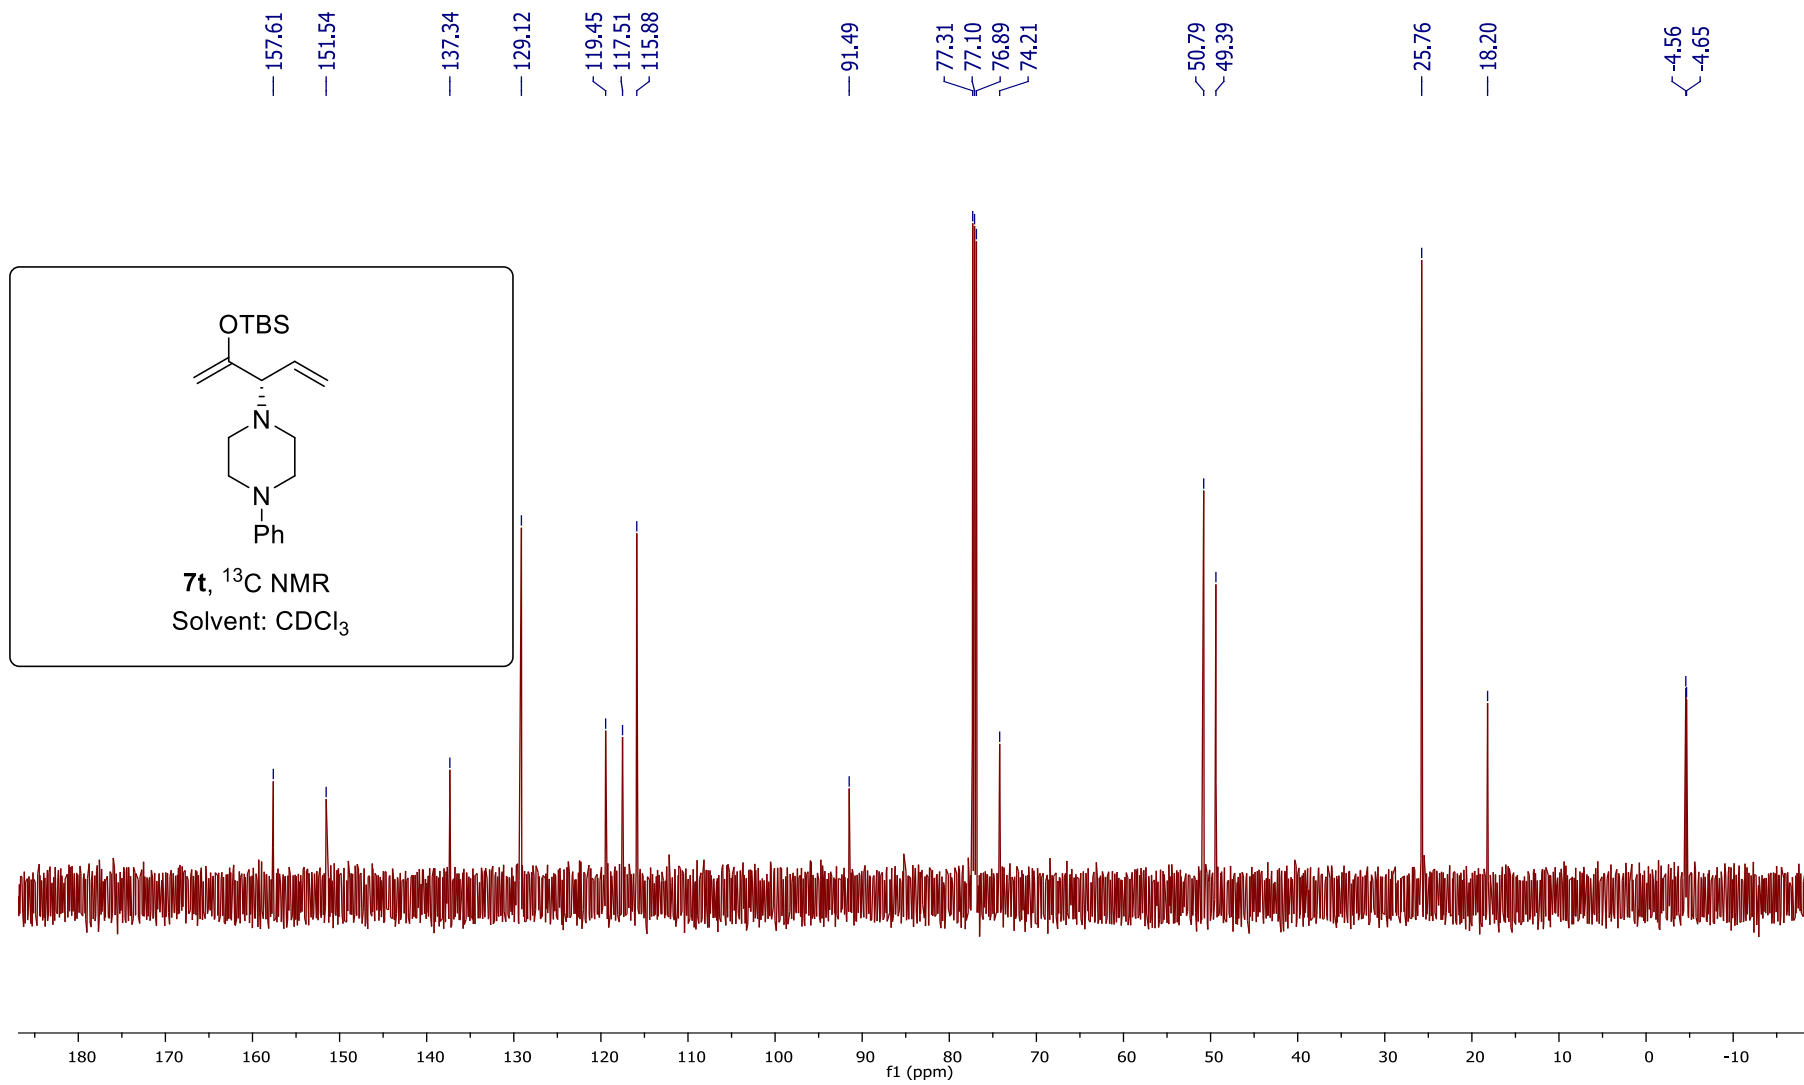

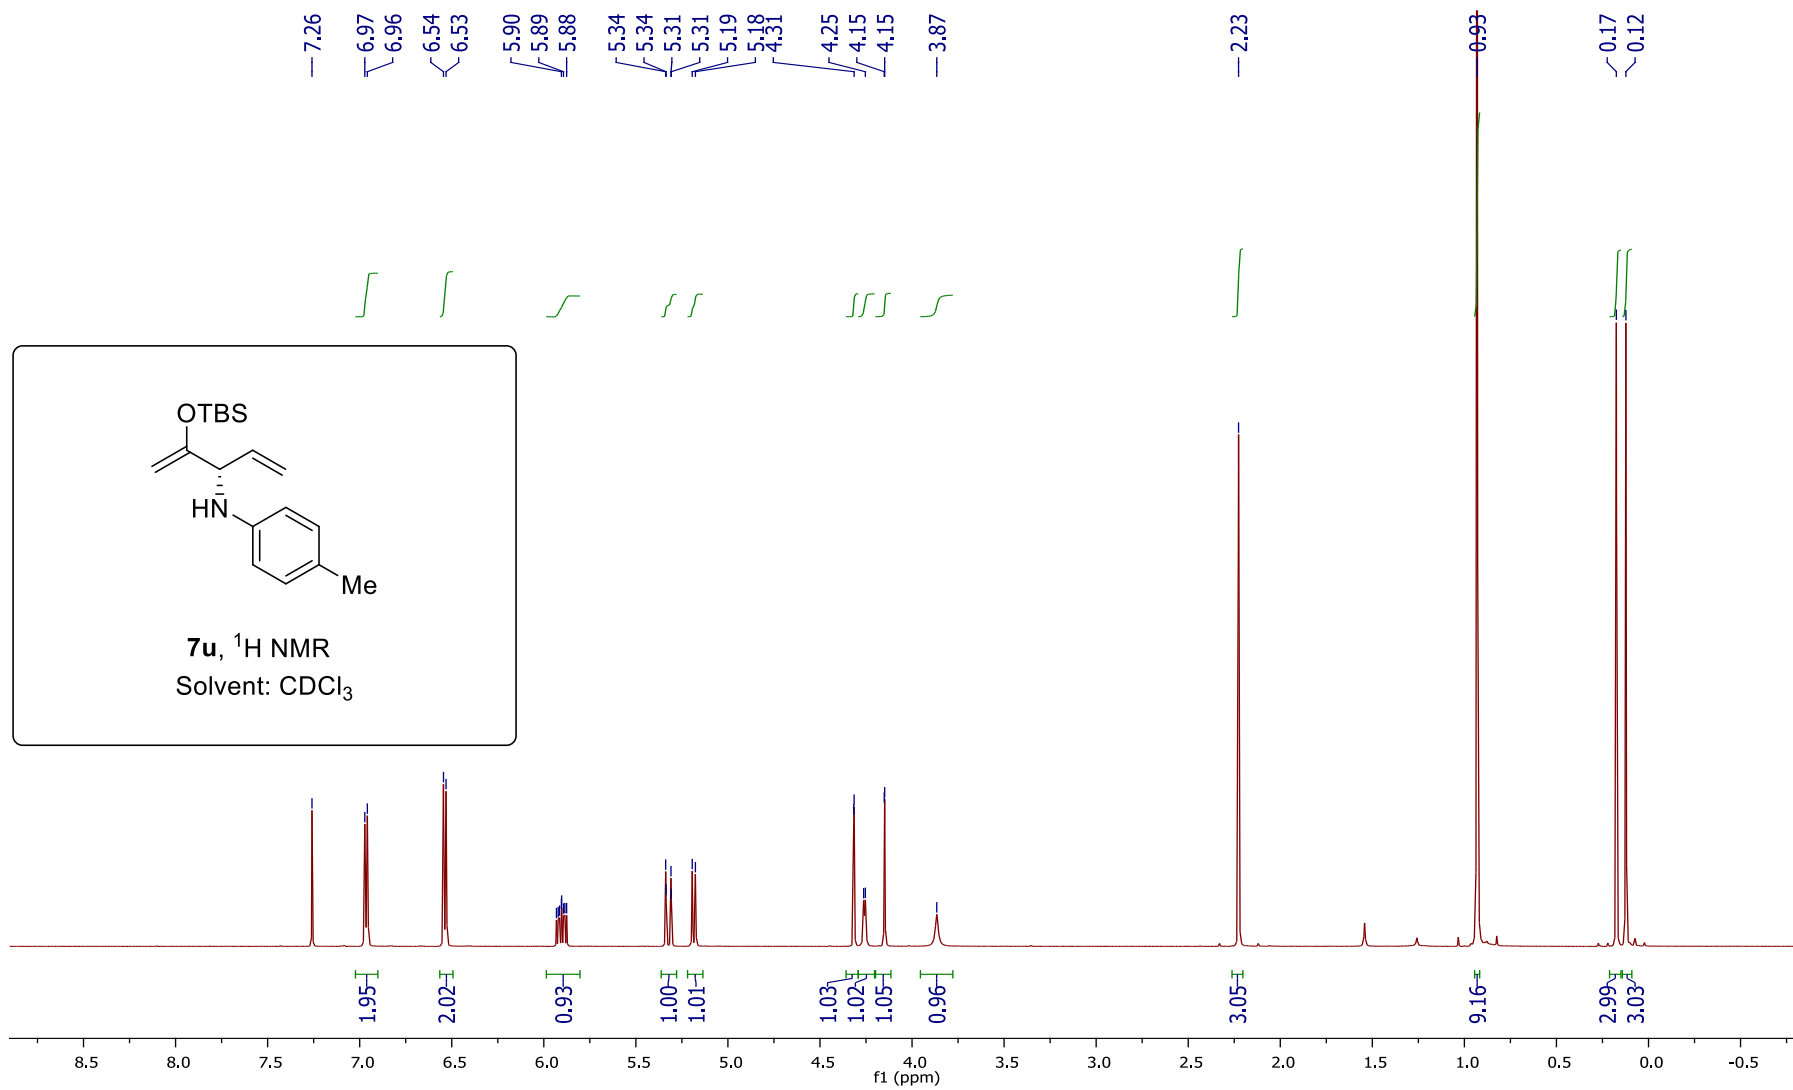

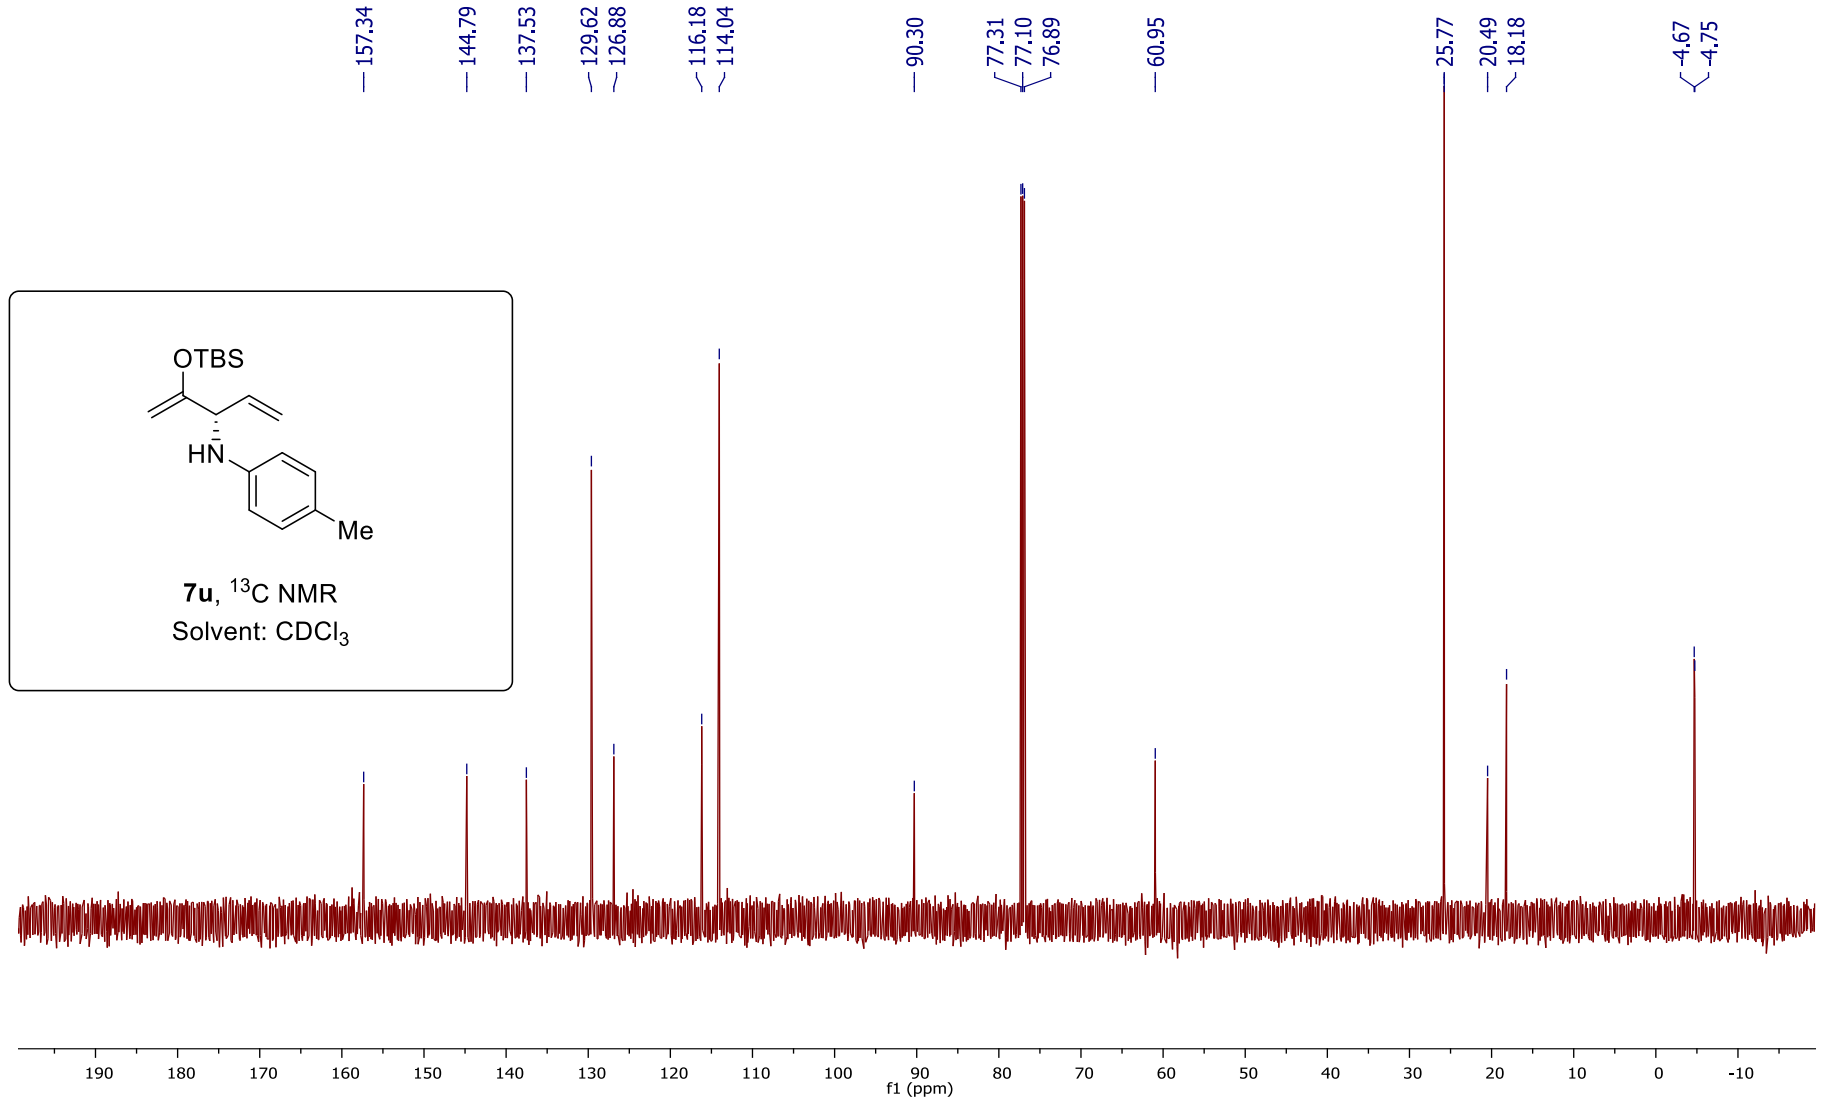

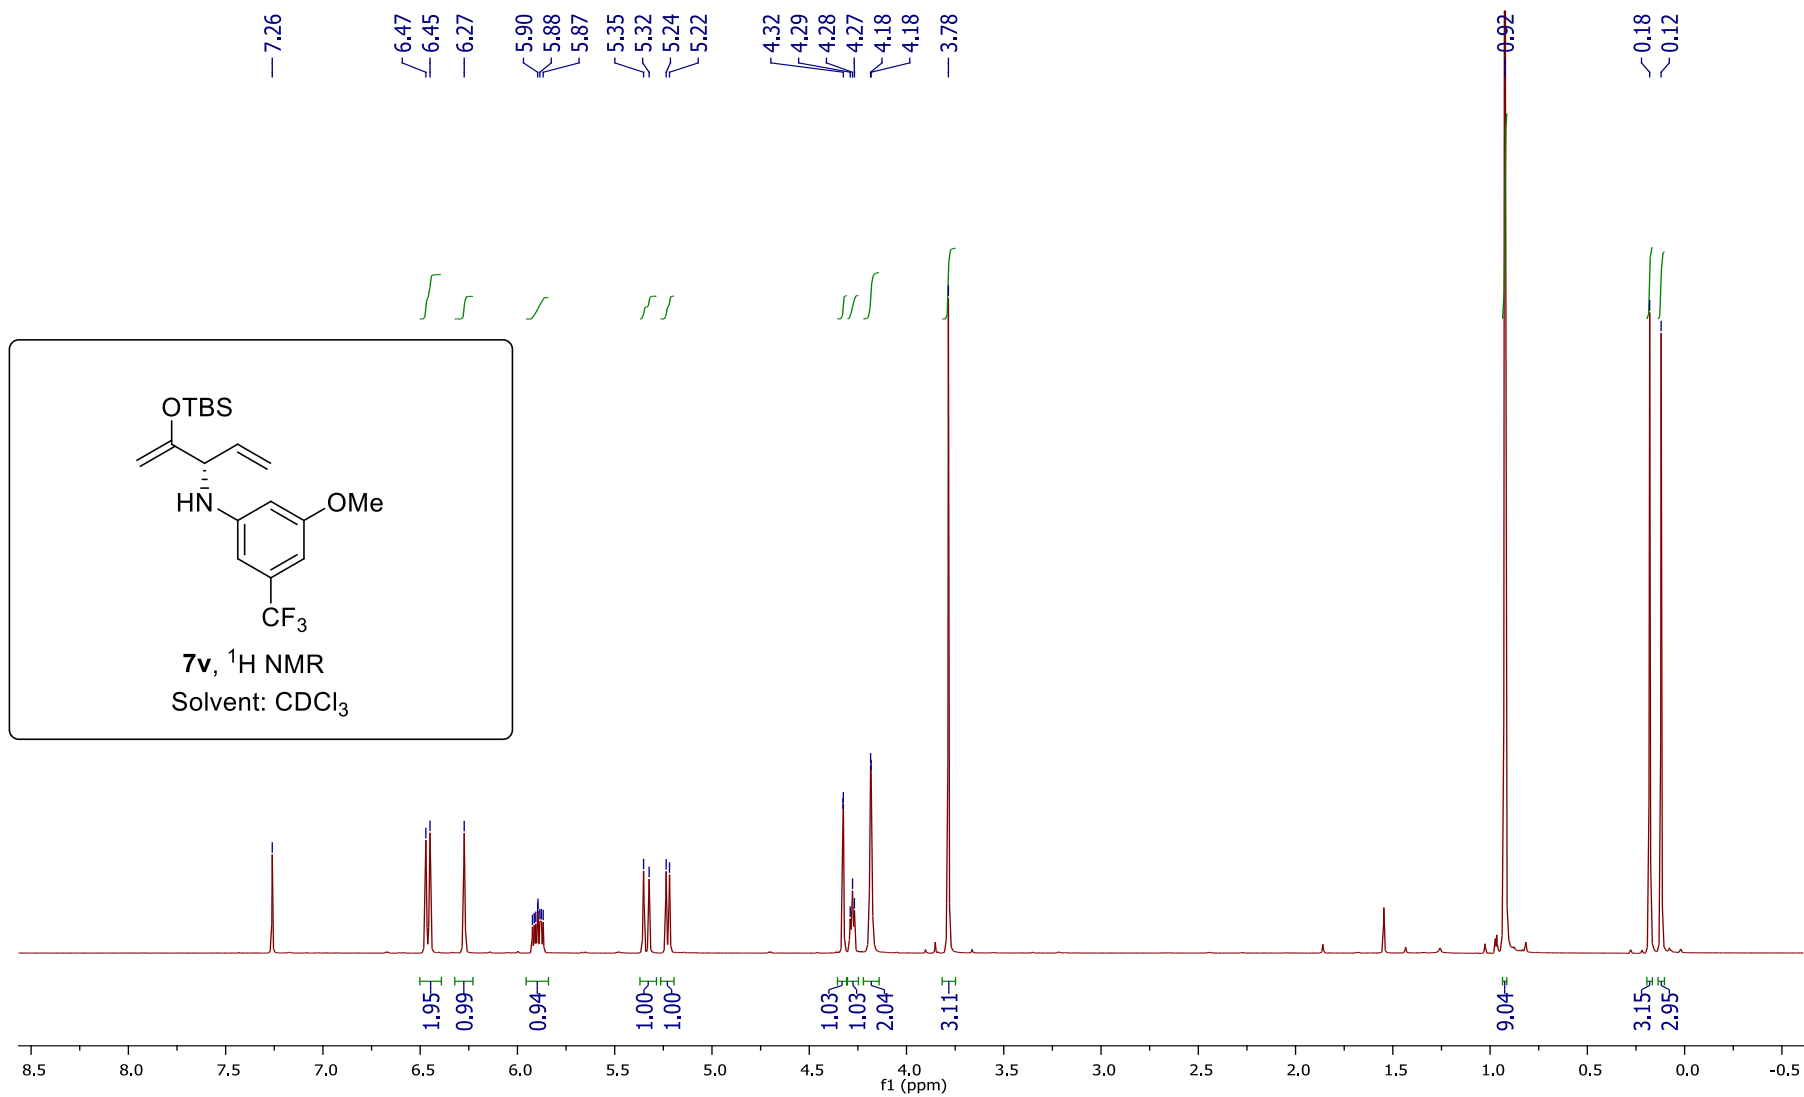

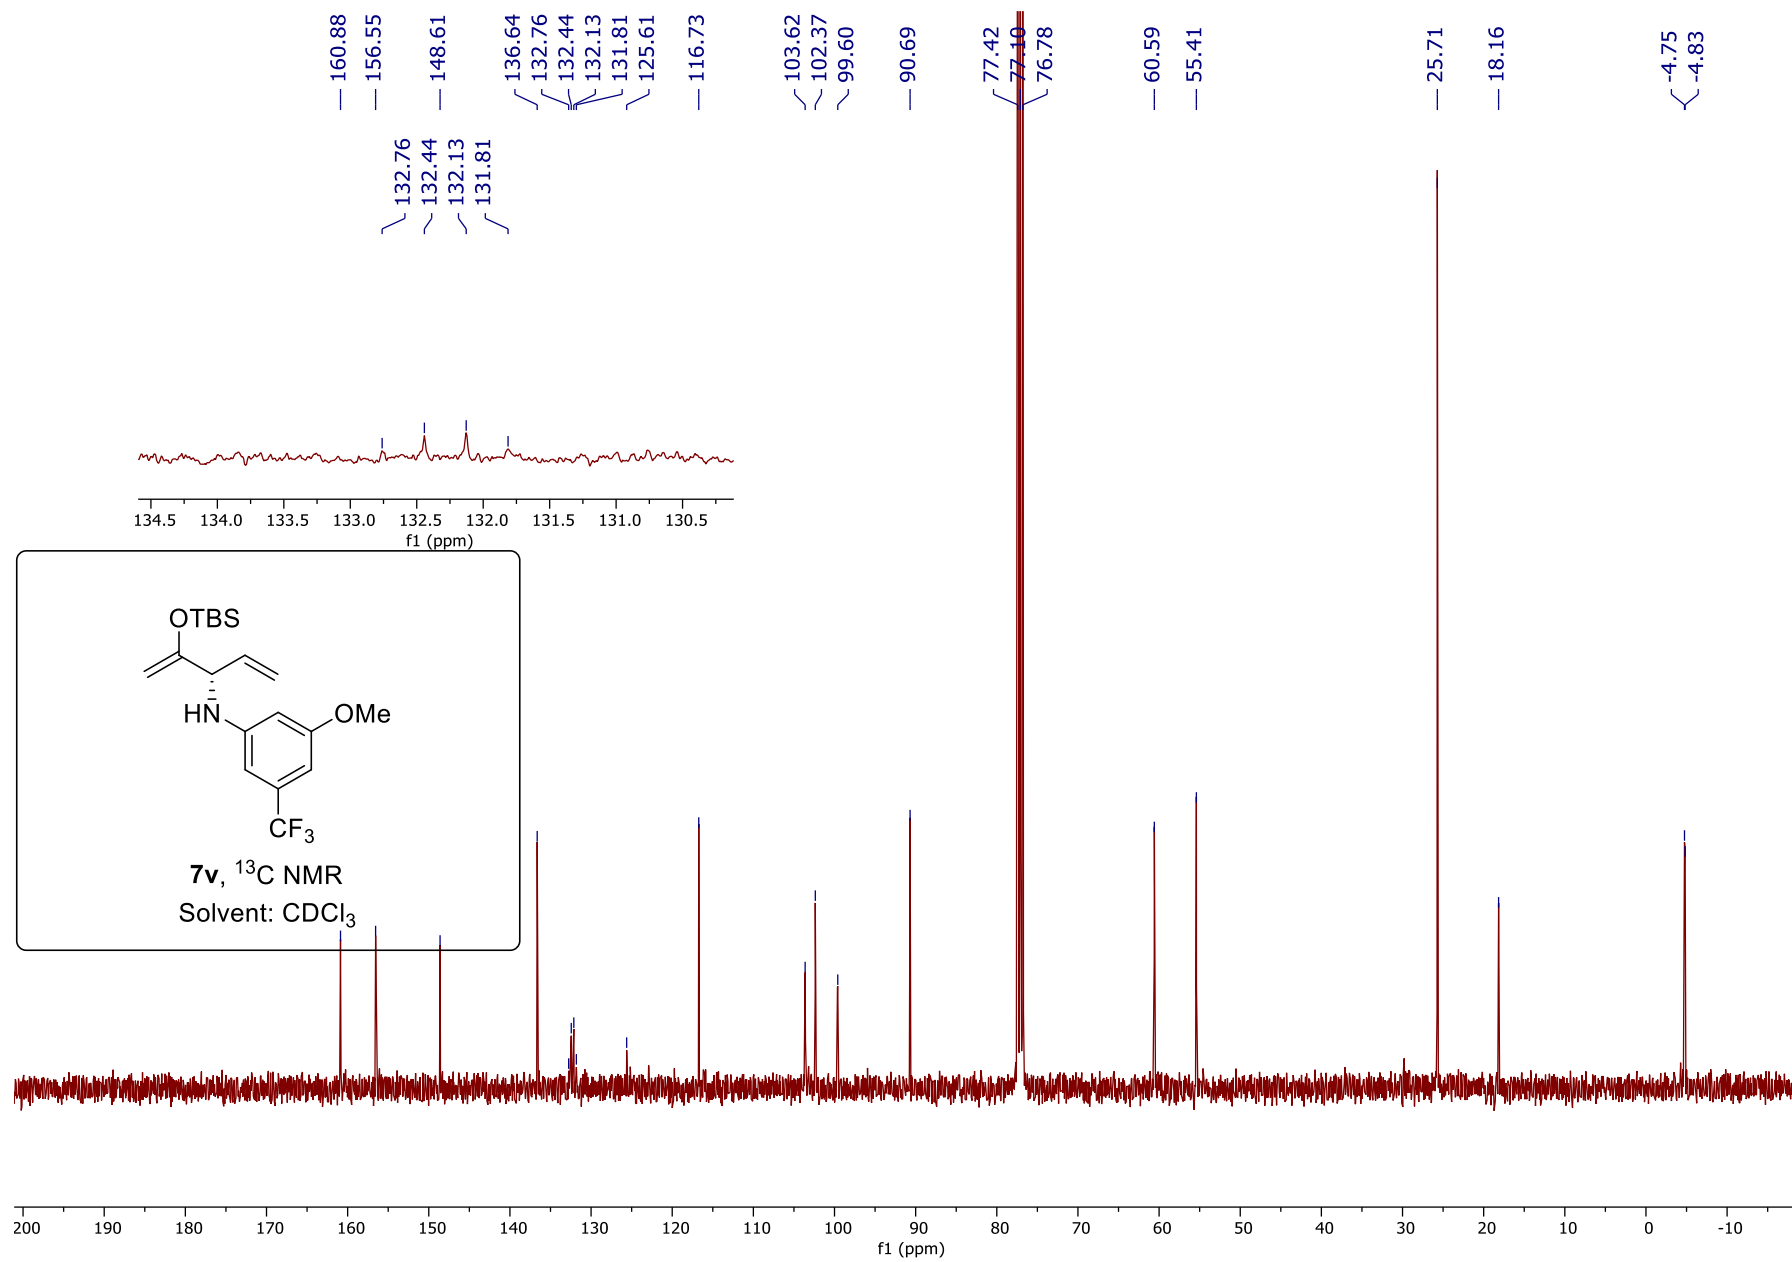



-62.28

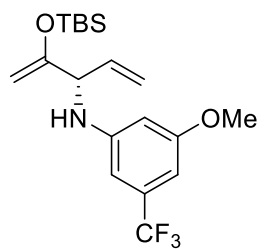

**7v**, <sup>19</sup>F NMR  
Solvent: CDCl<sub>3</sub>

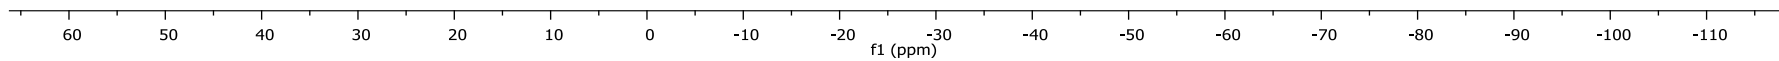

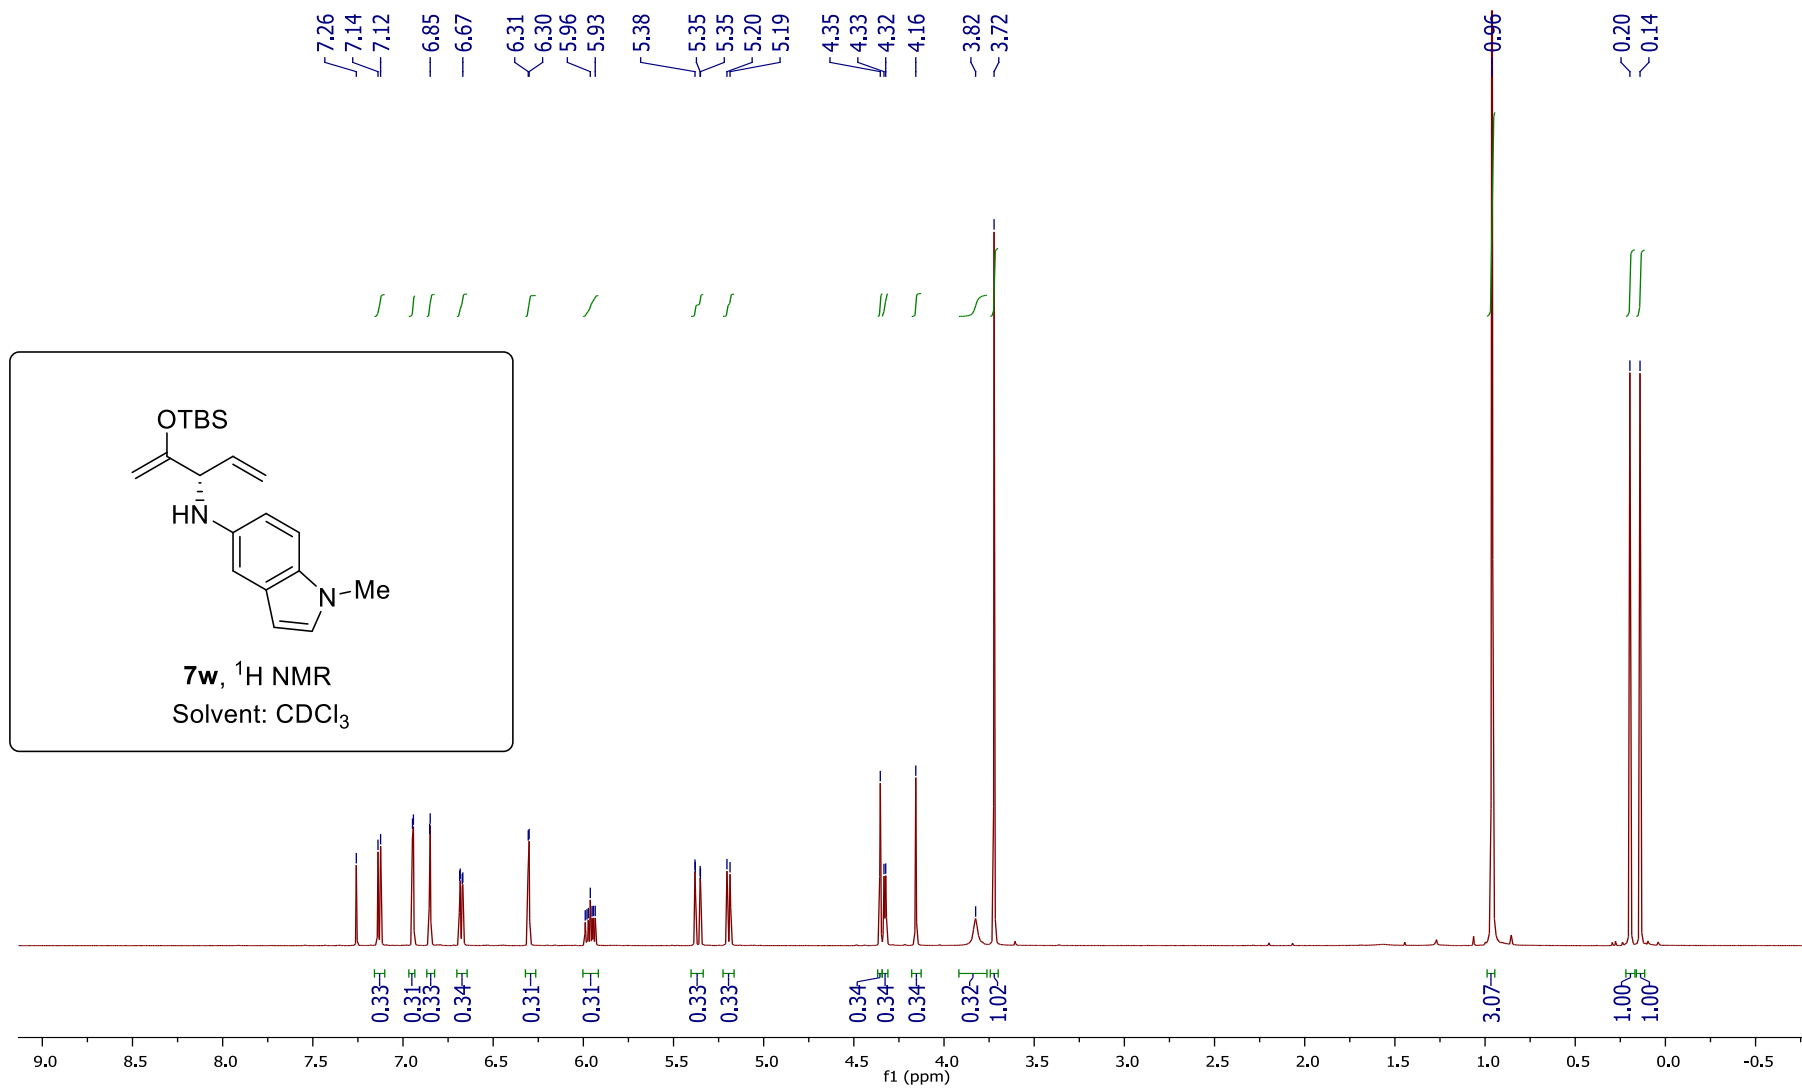

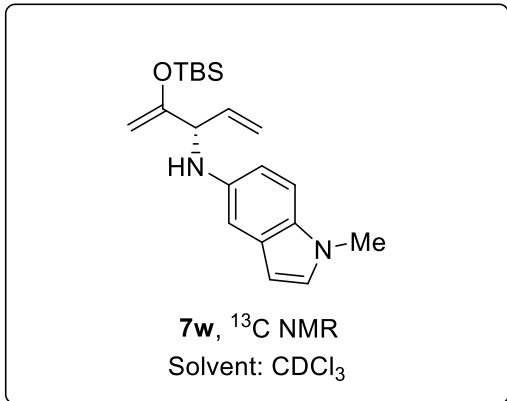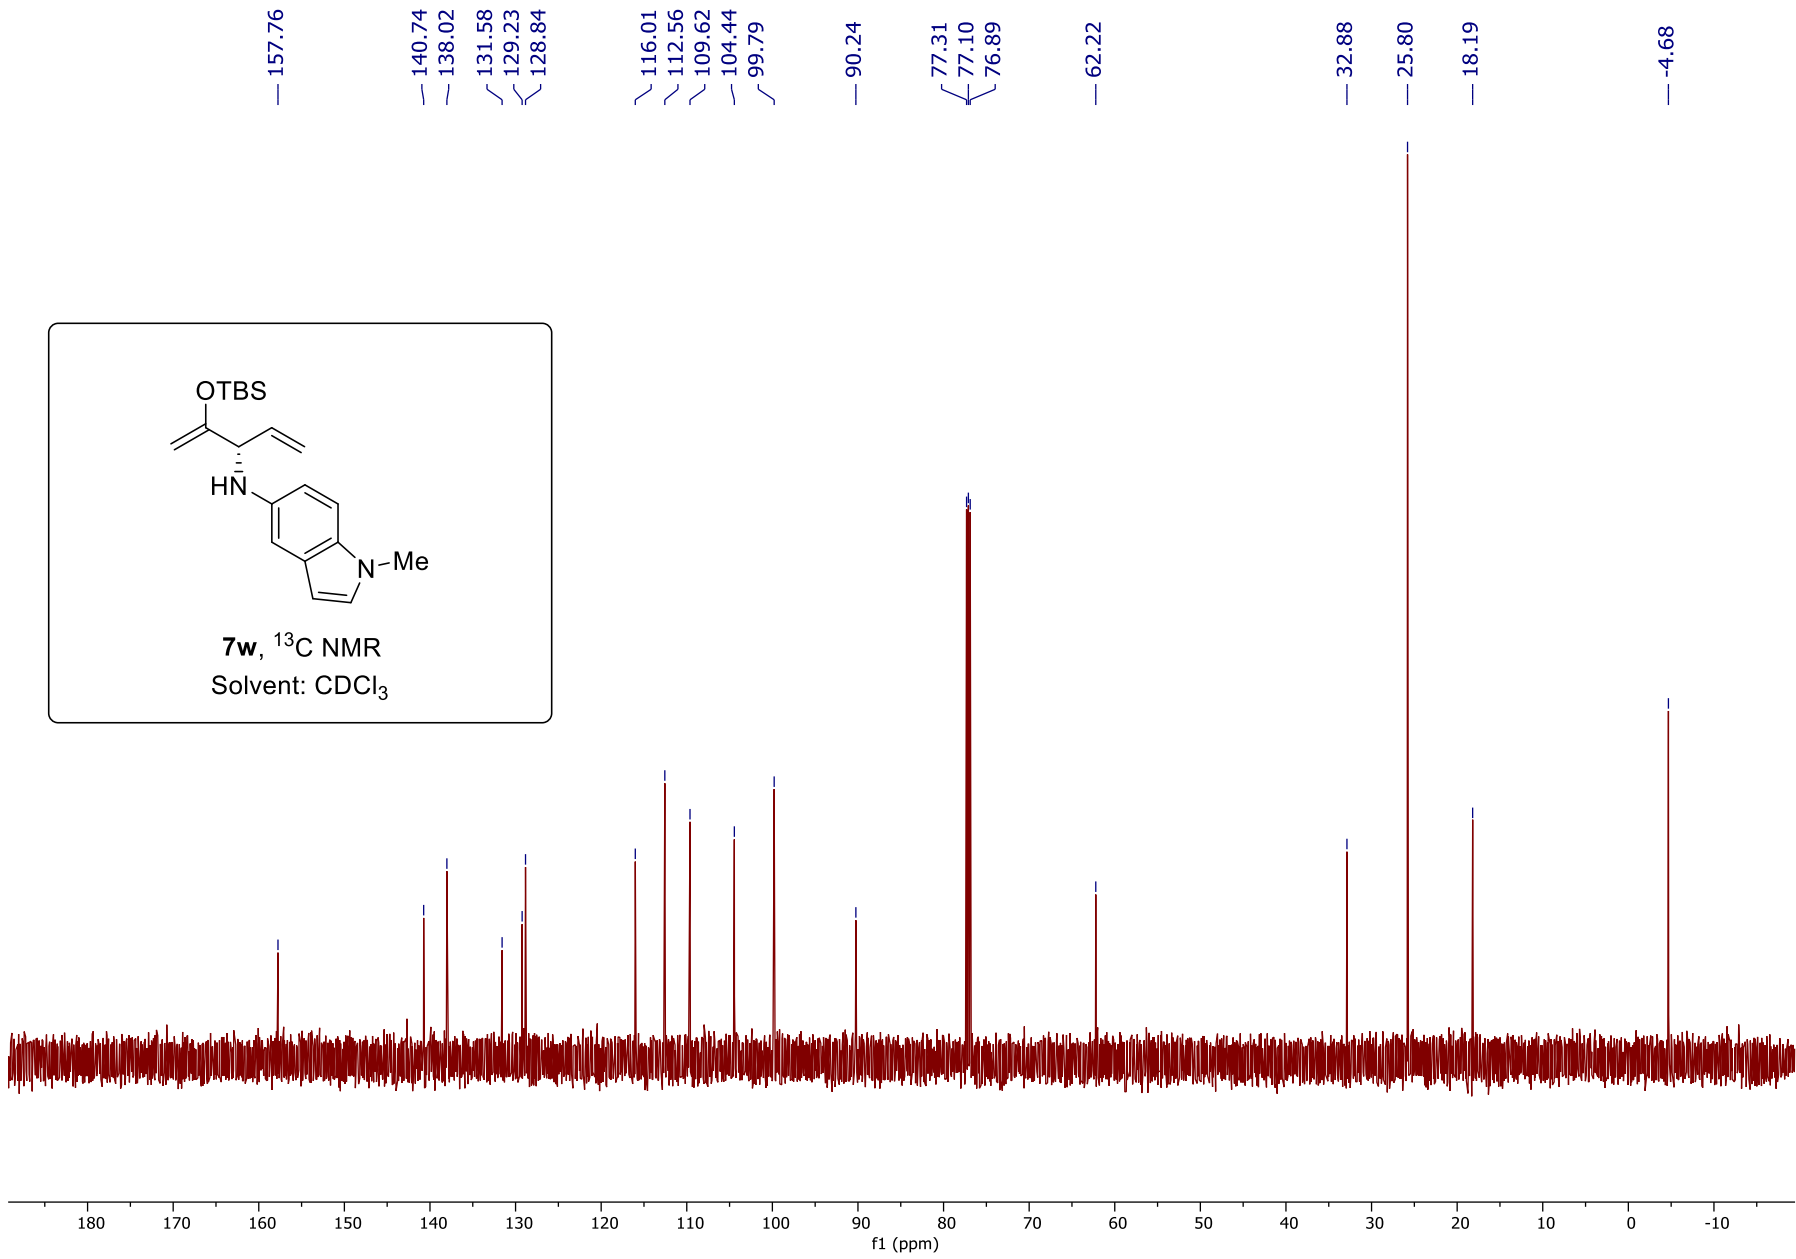

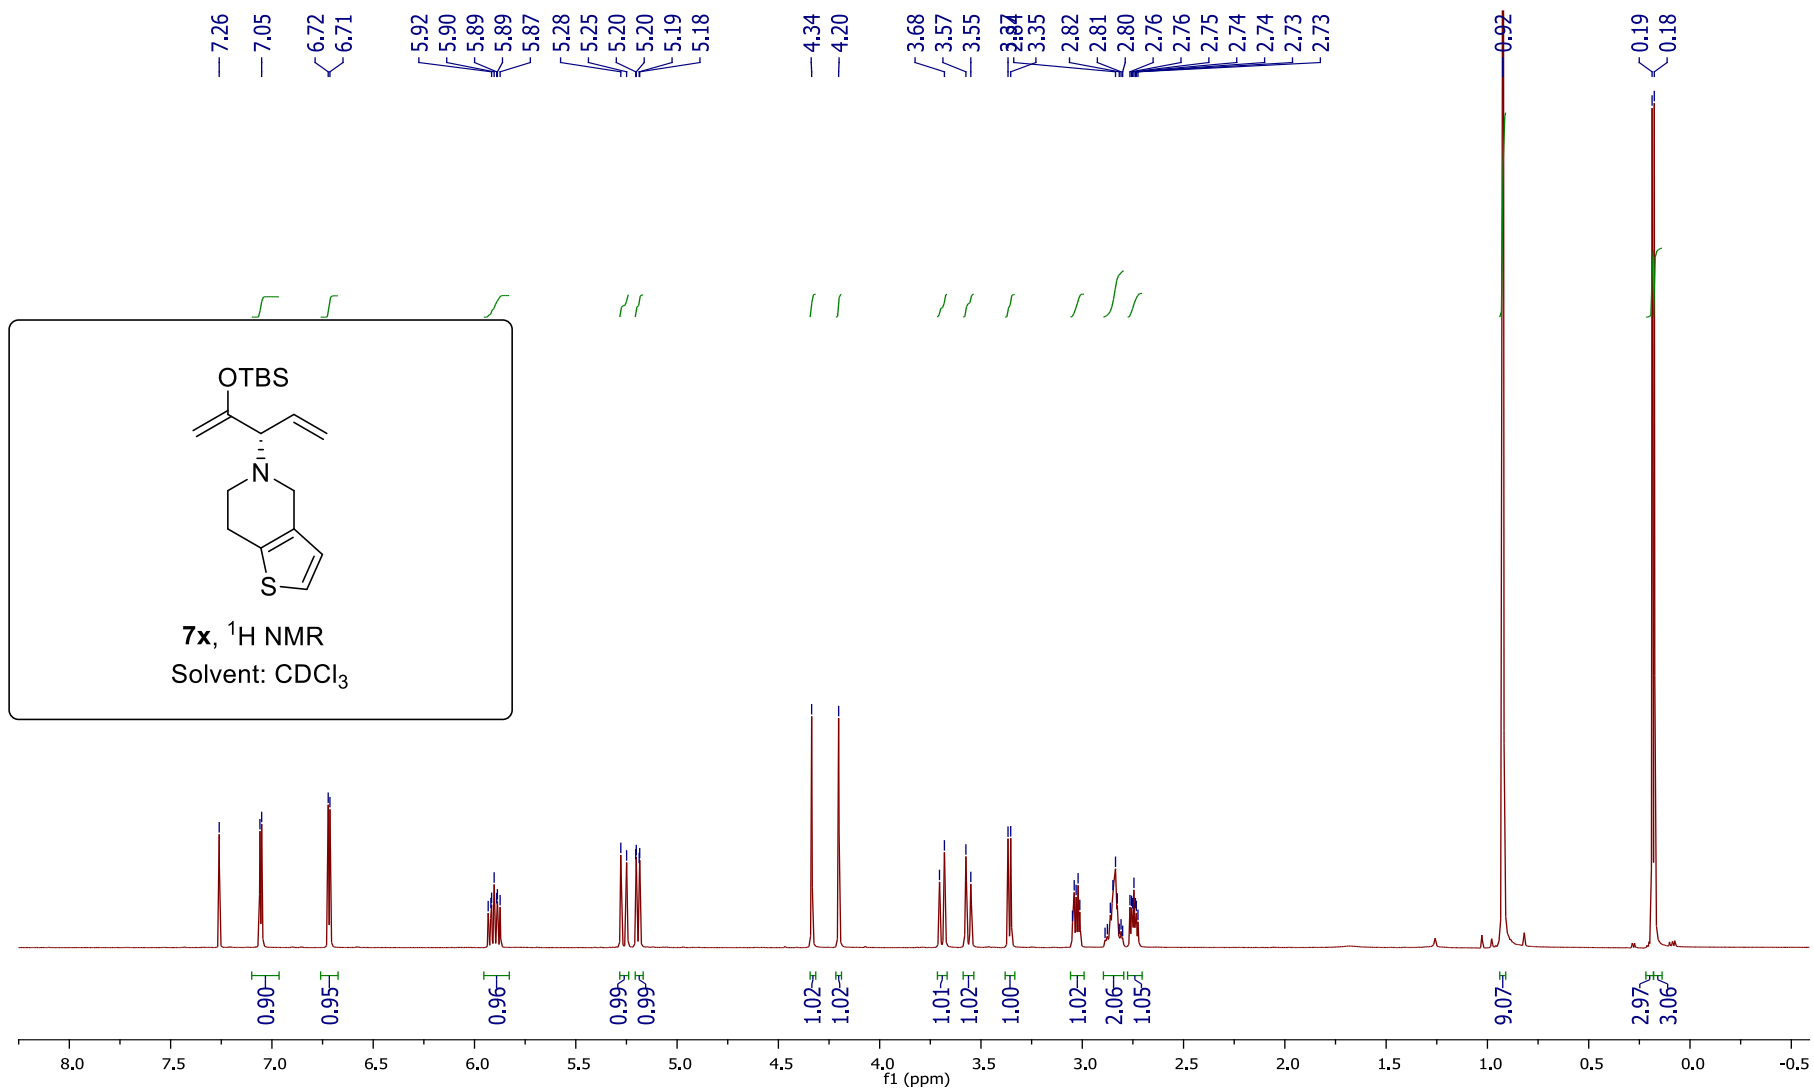

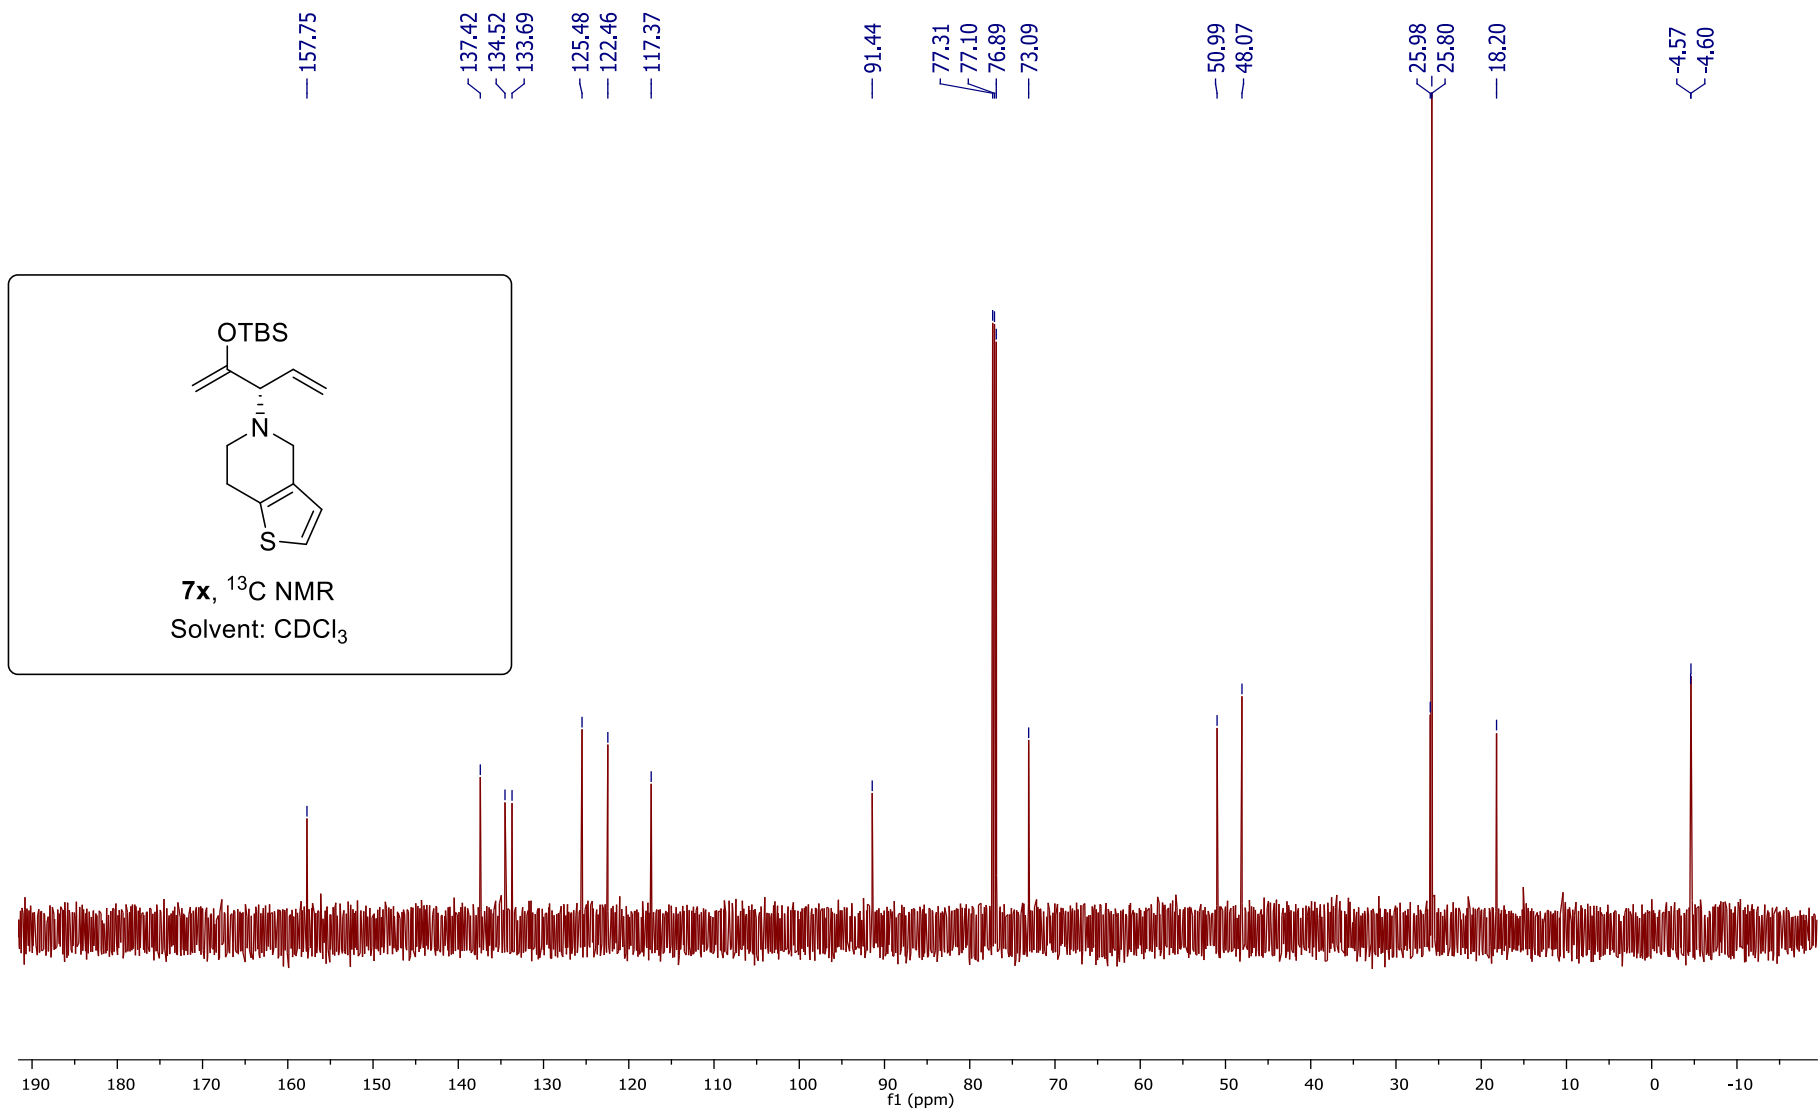

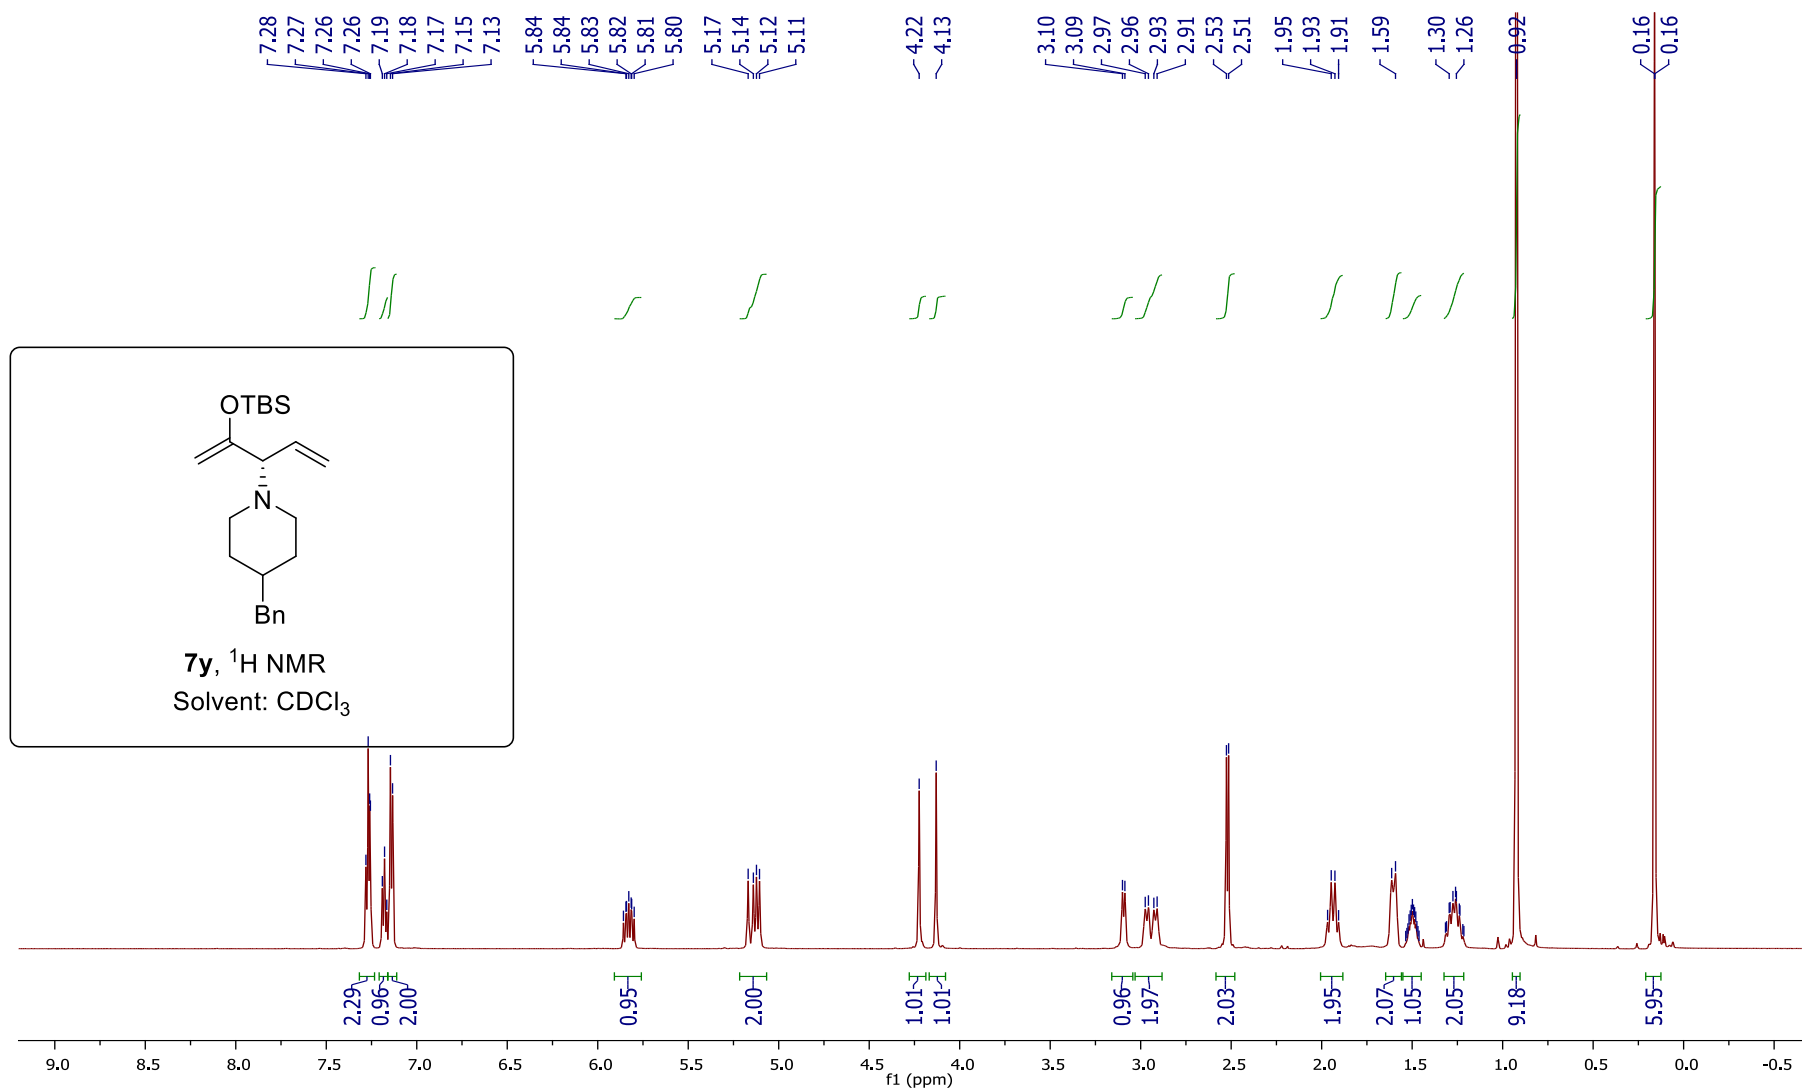

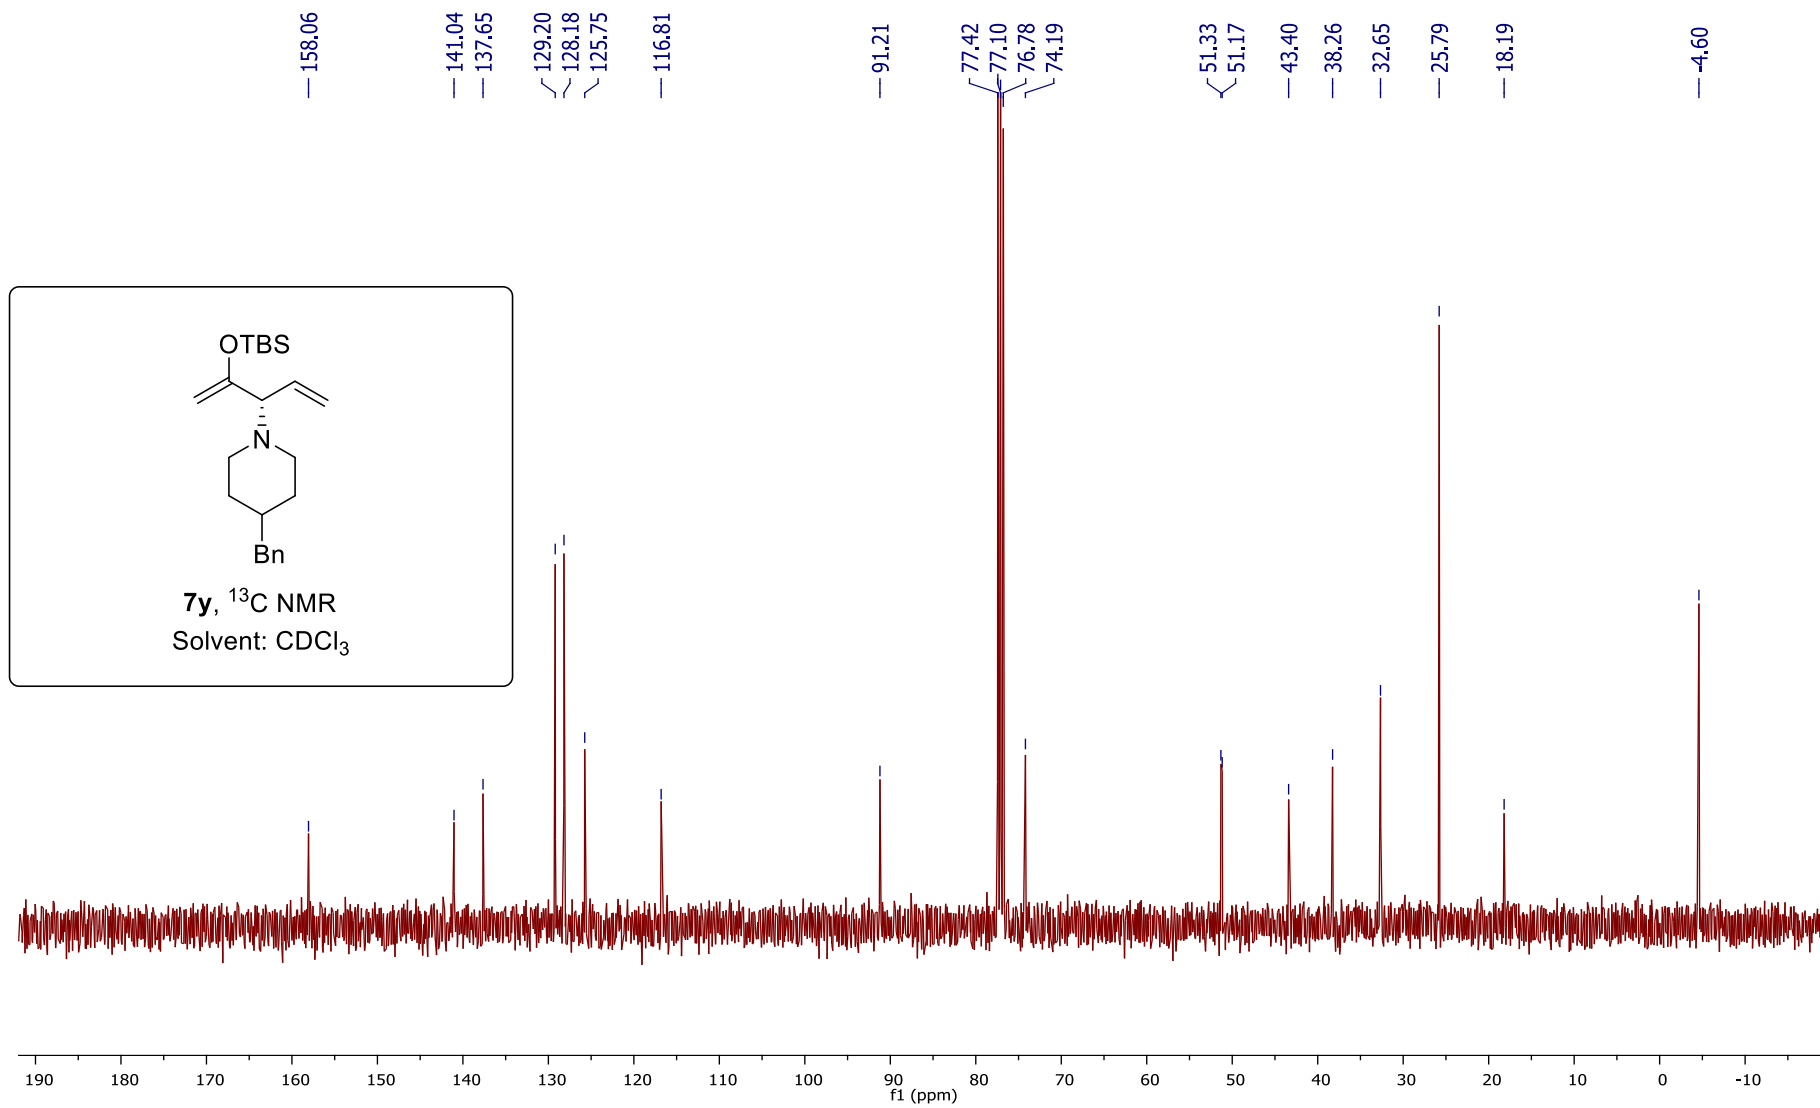

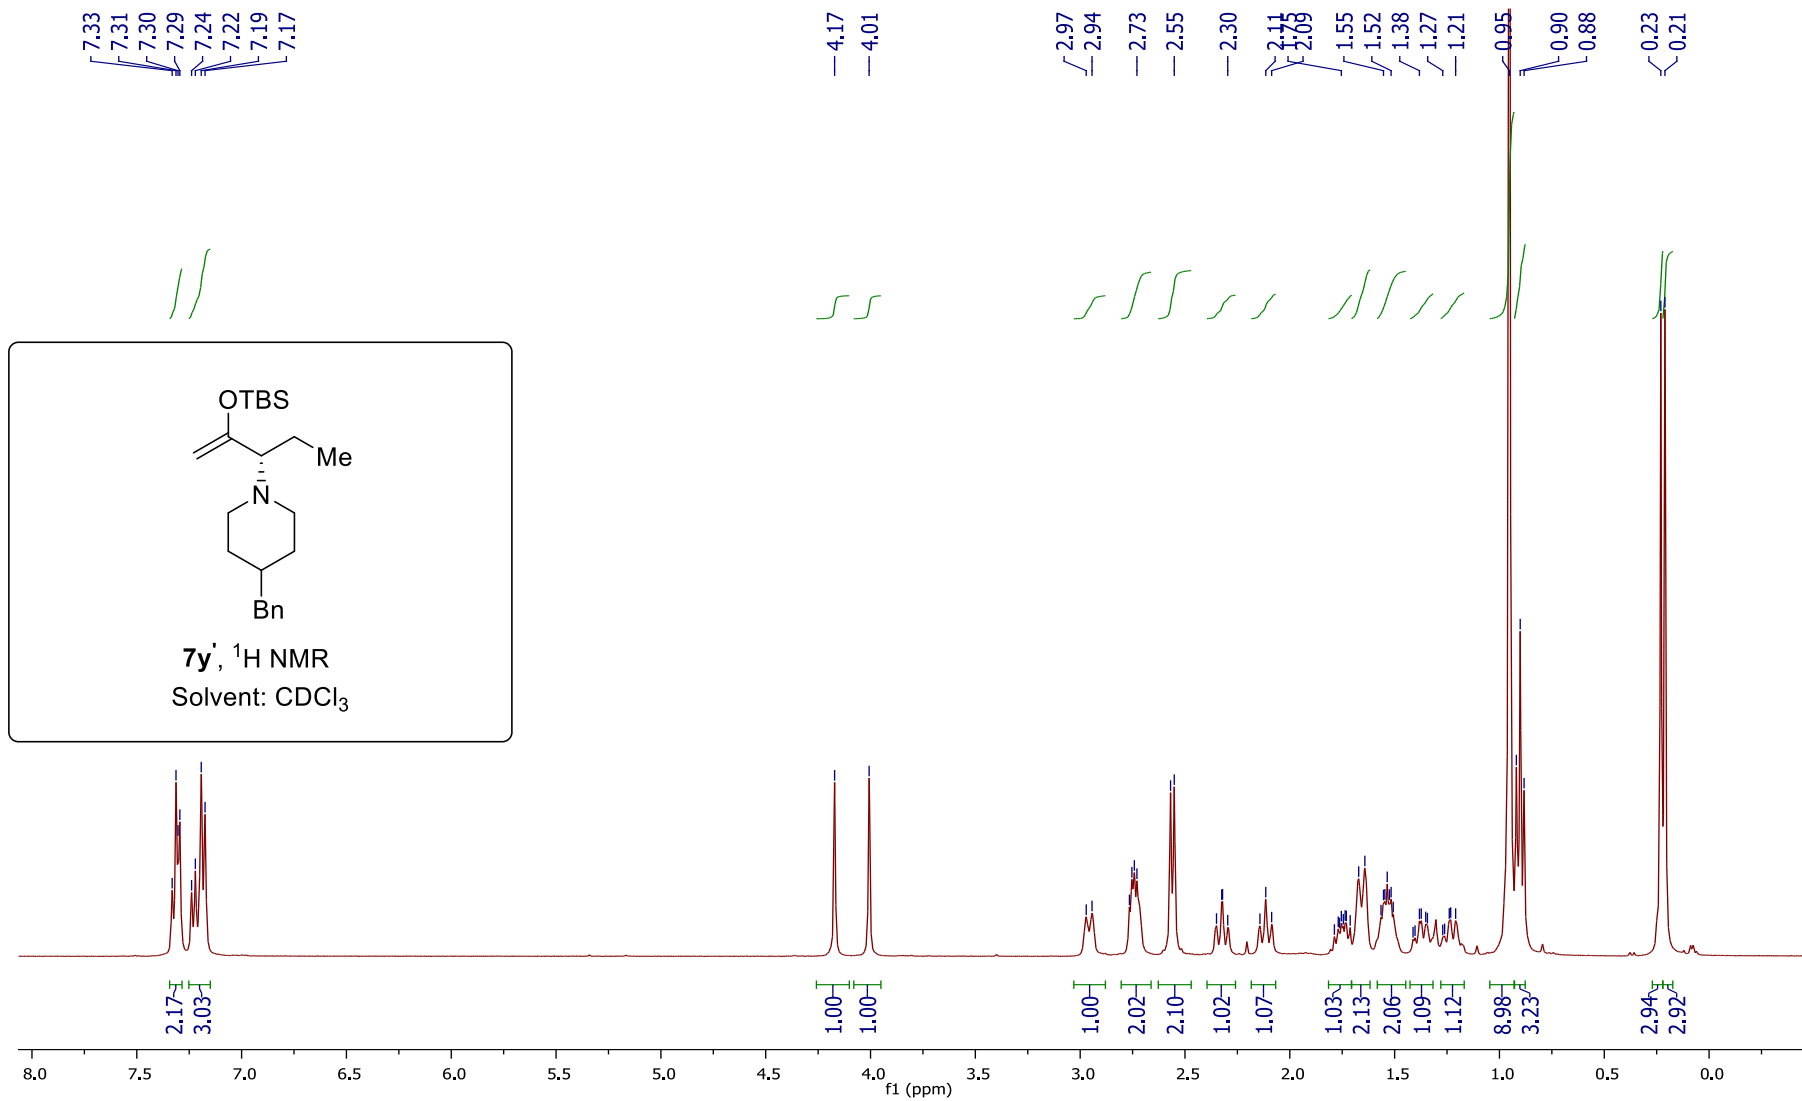



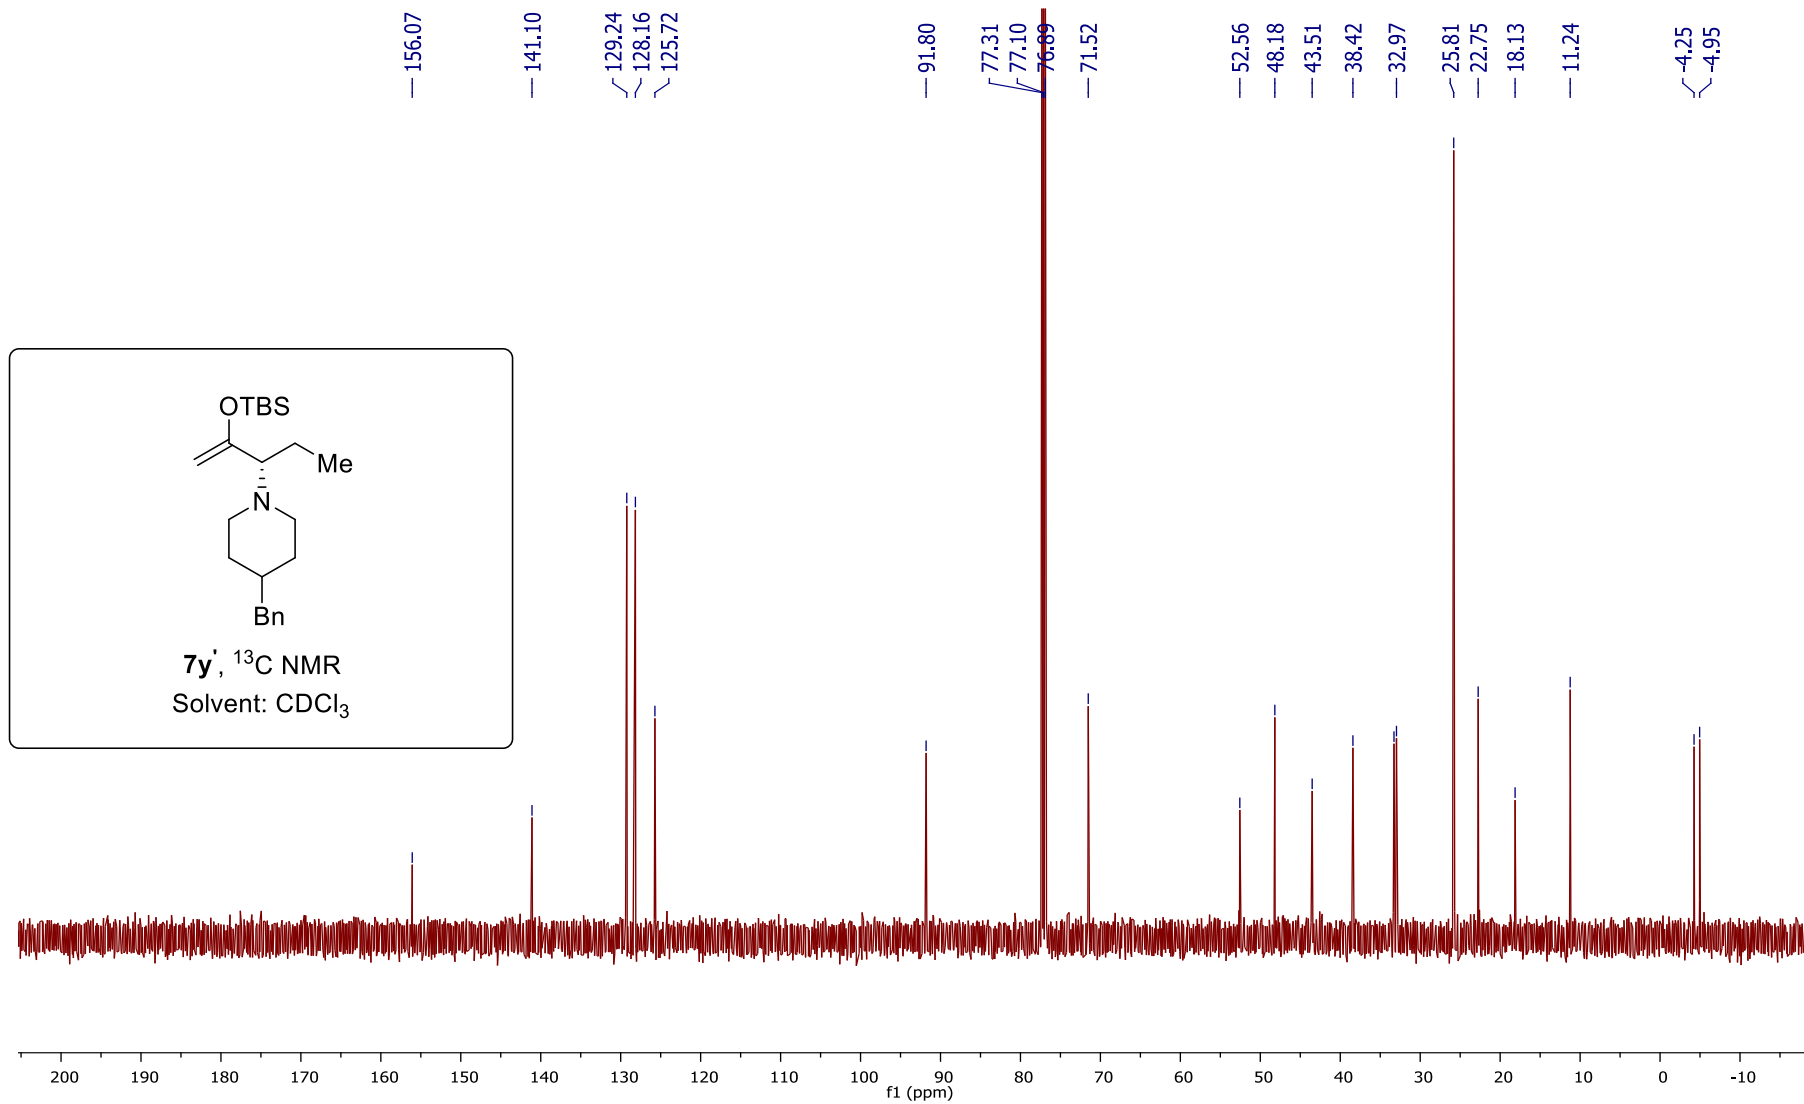

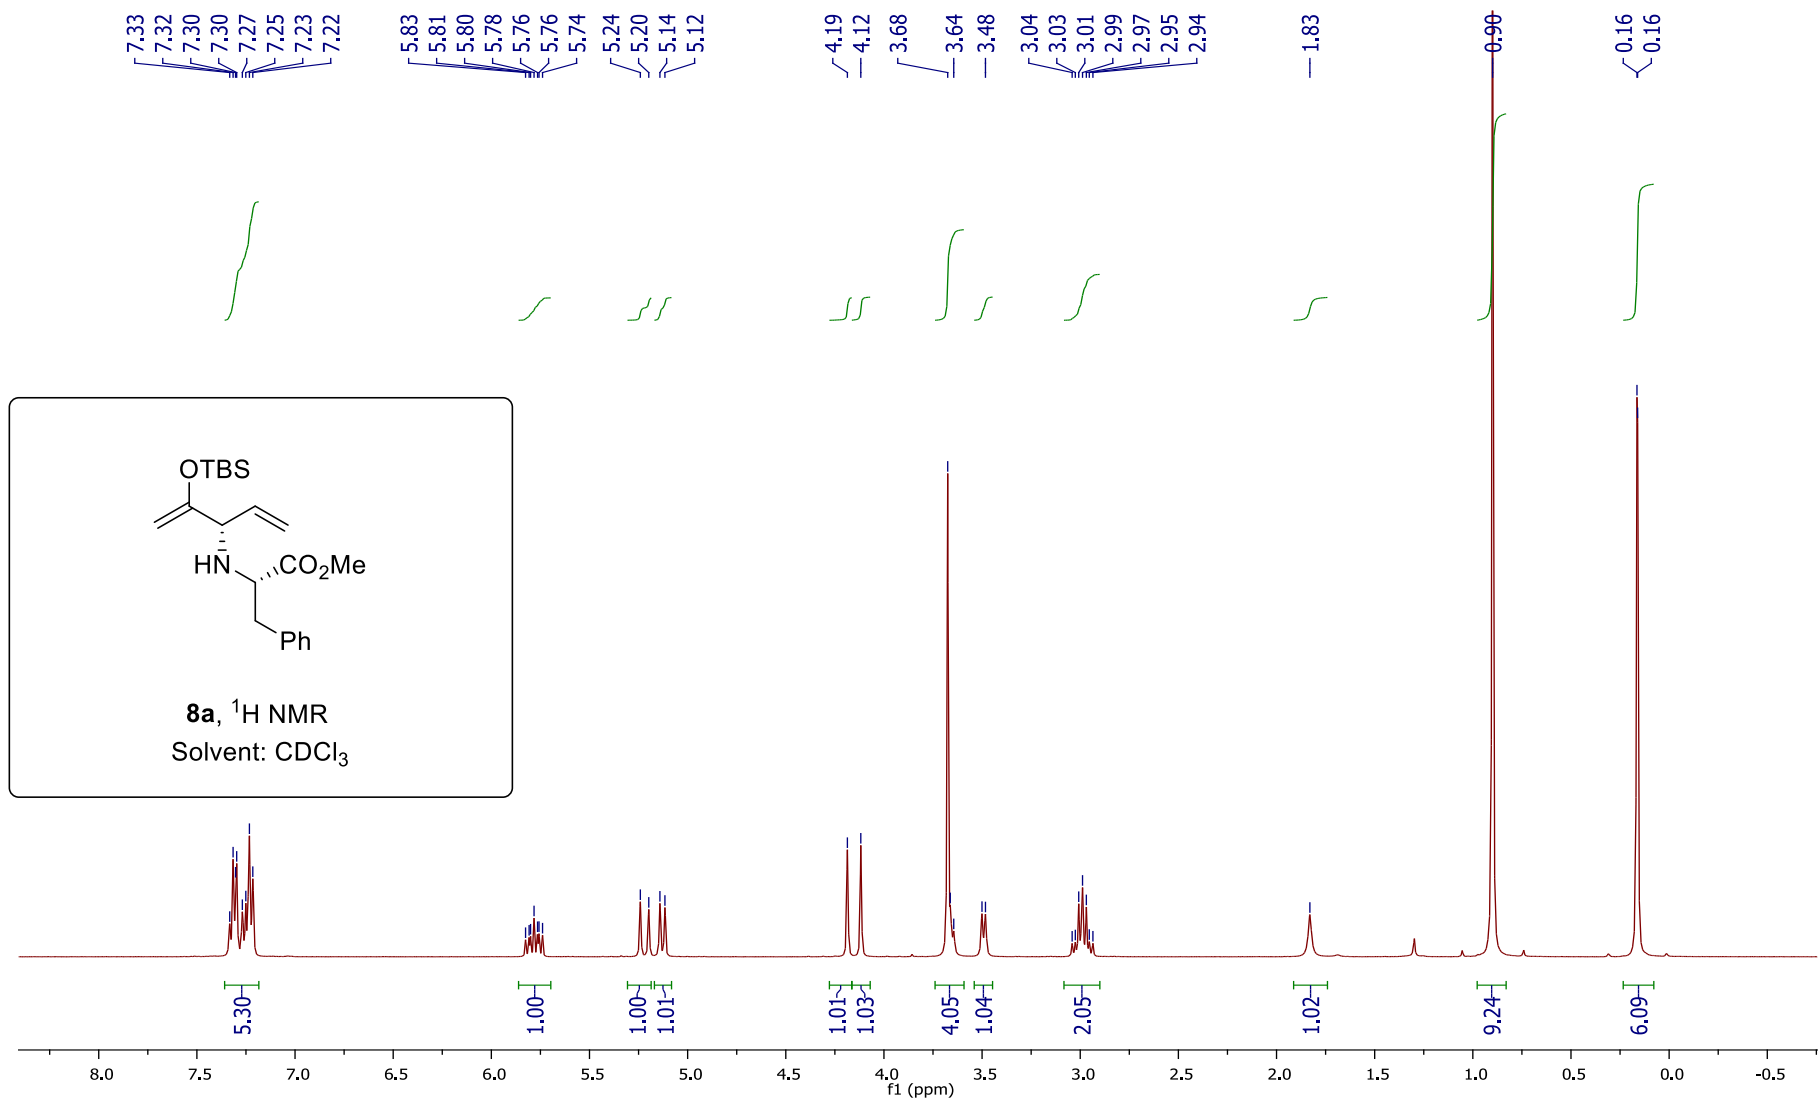

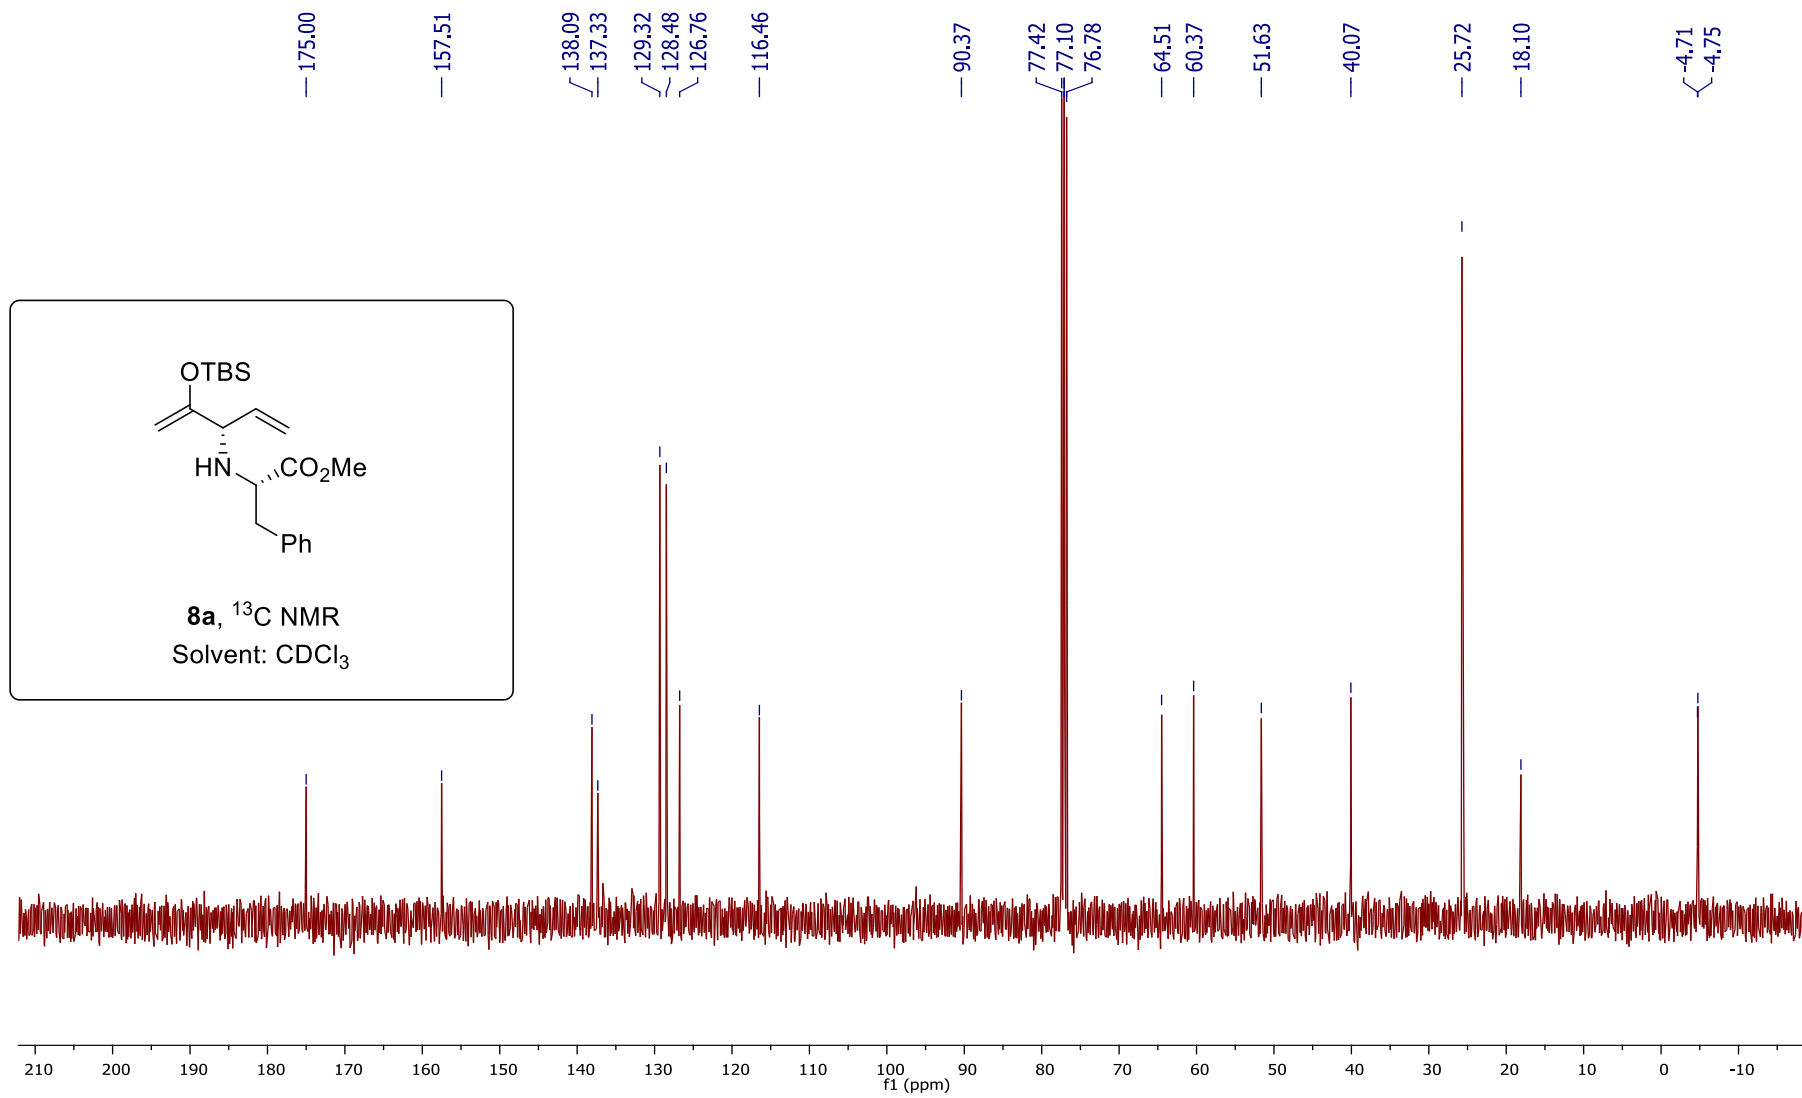

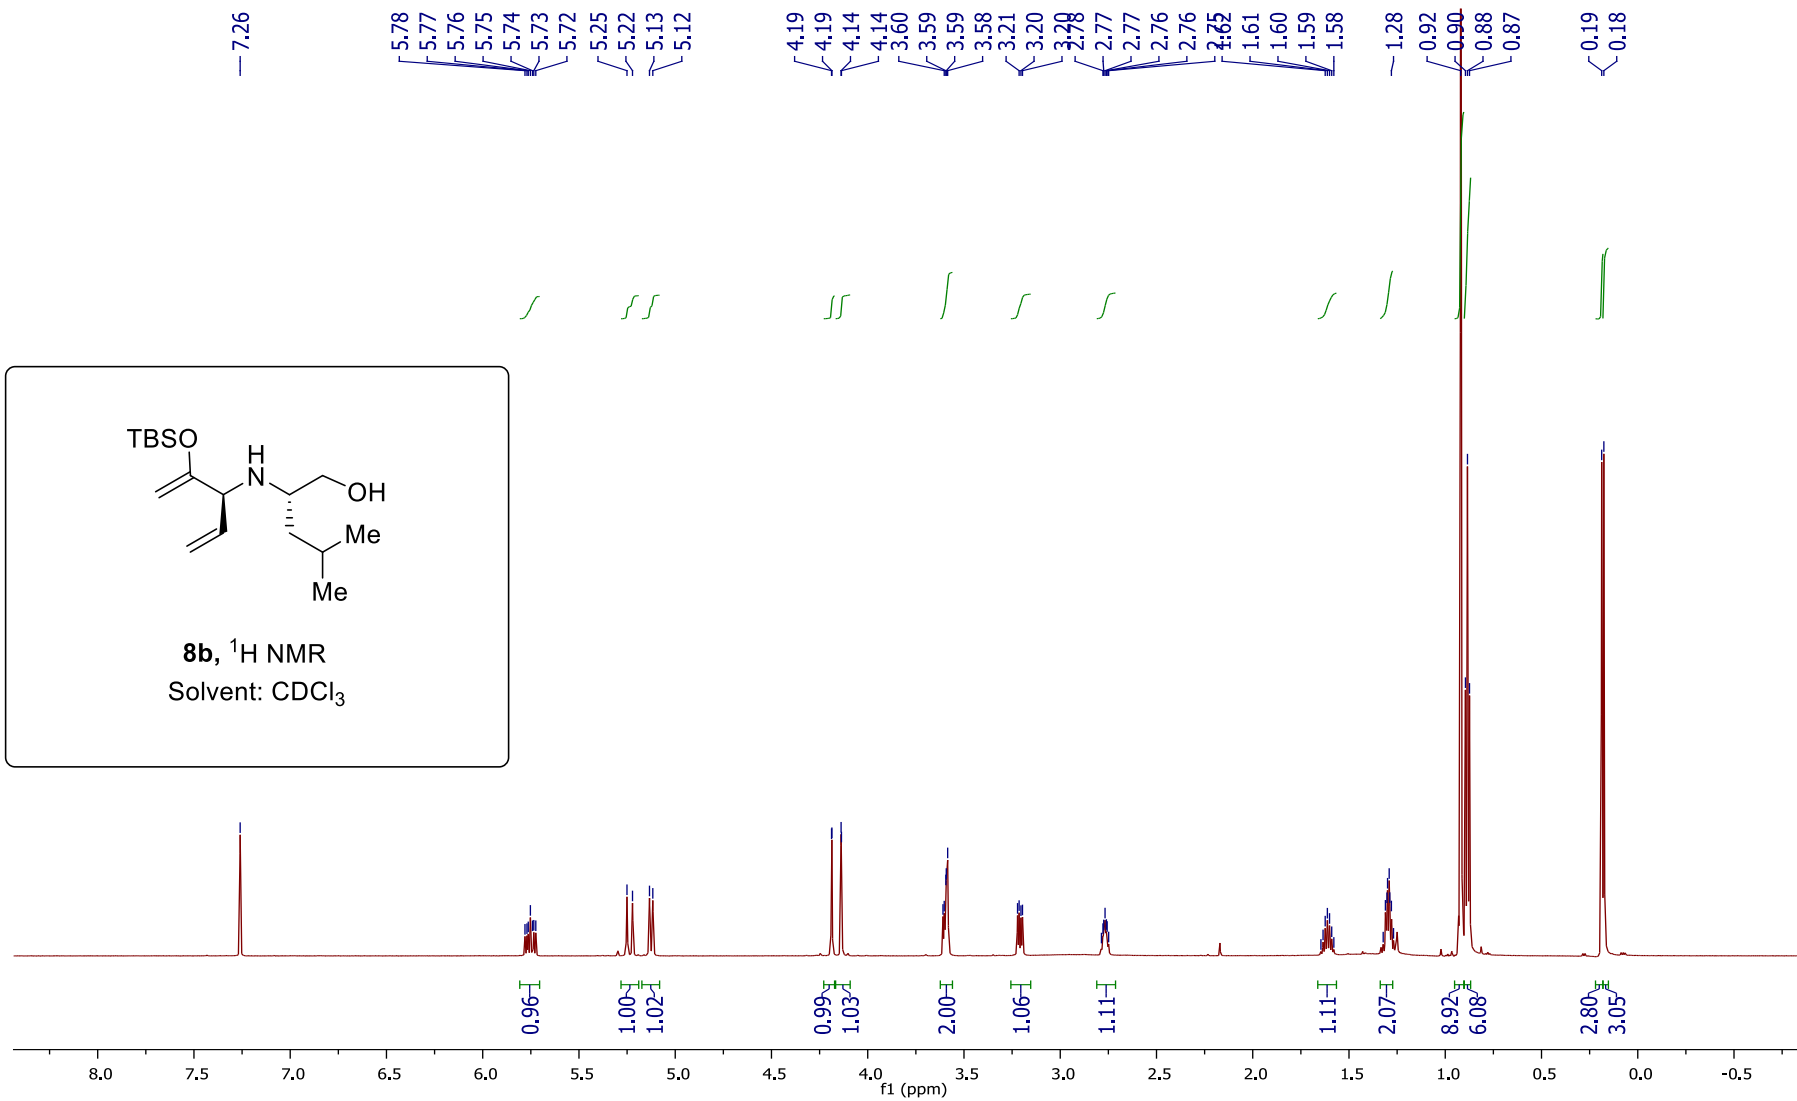

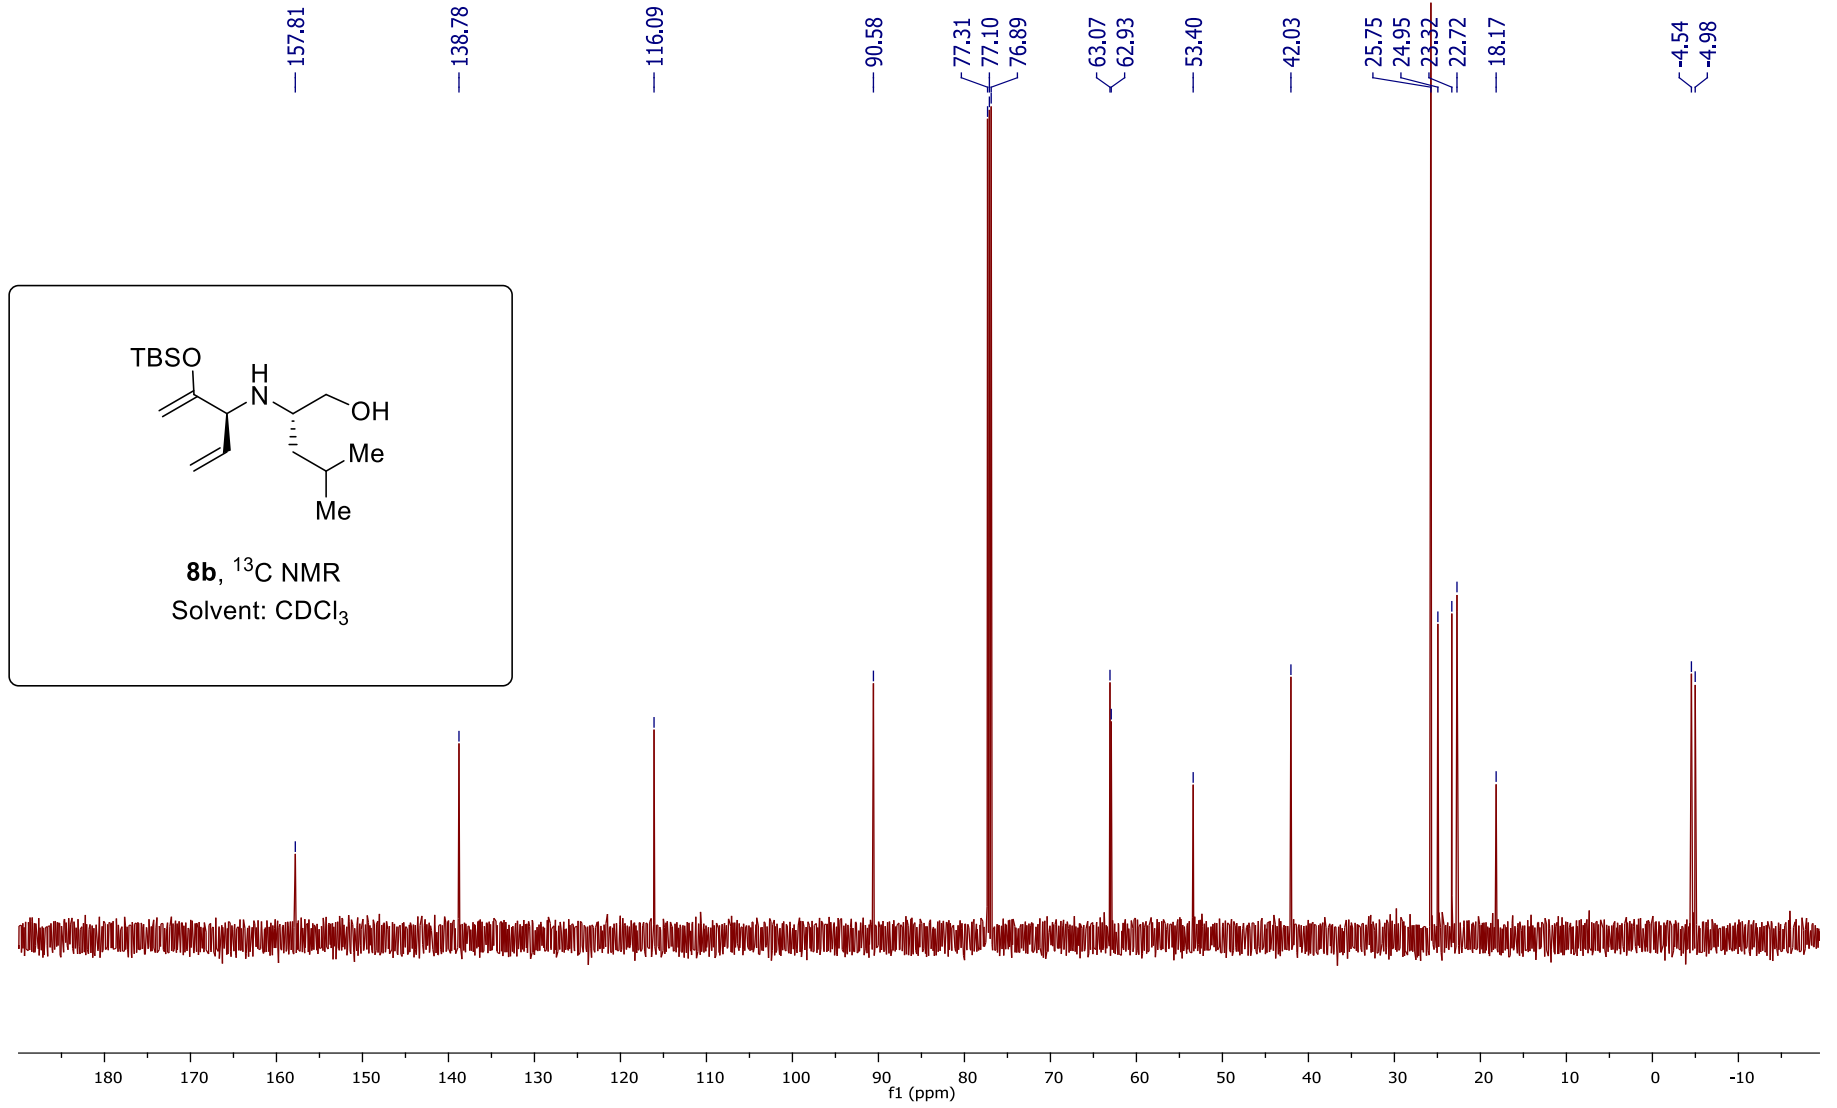

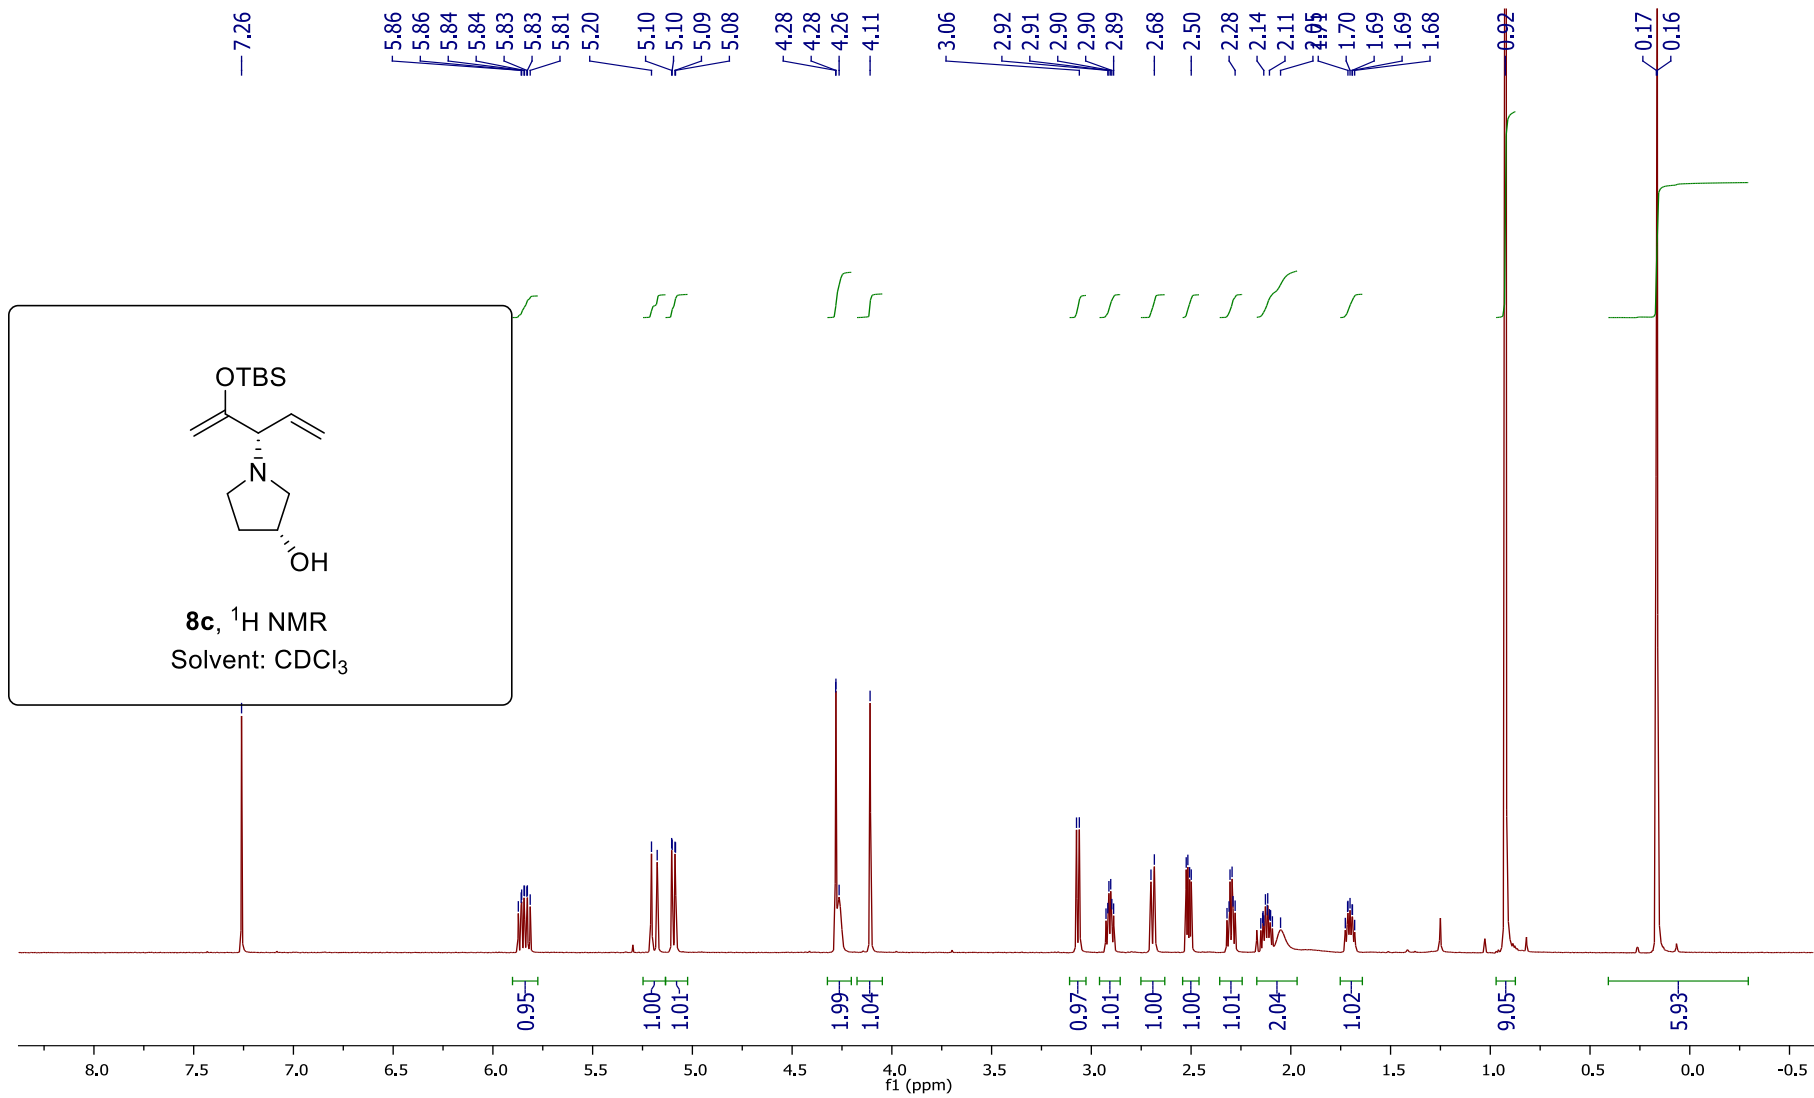

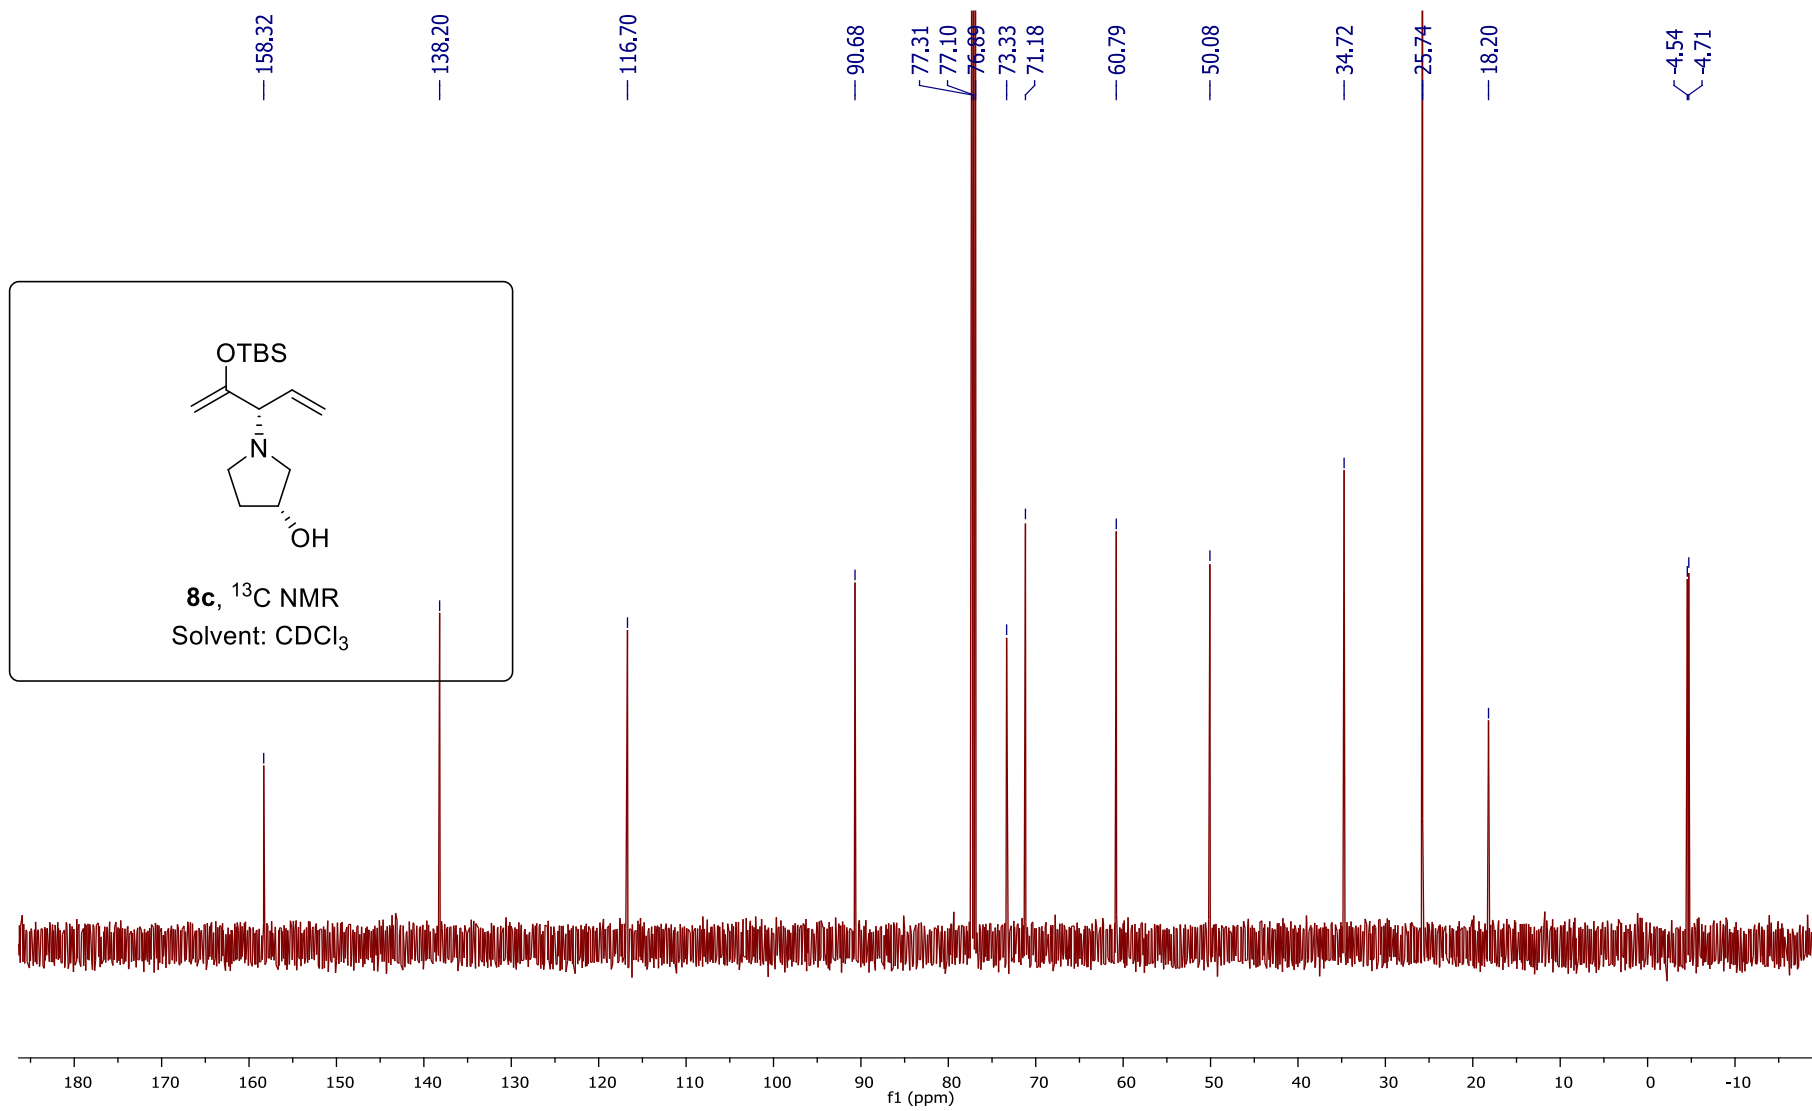

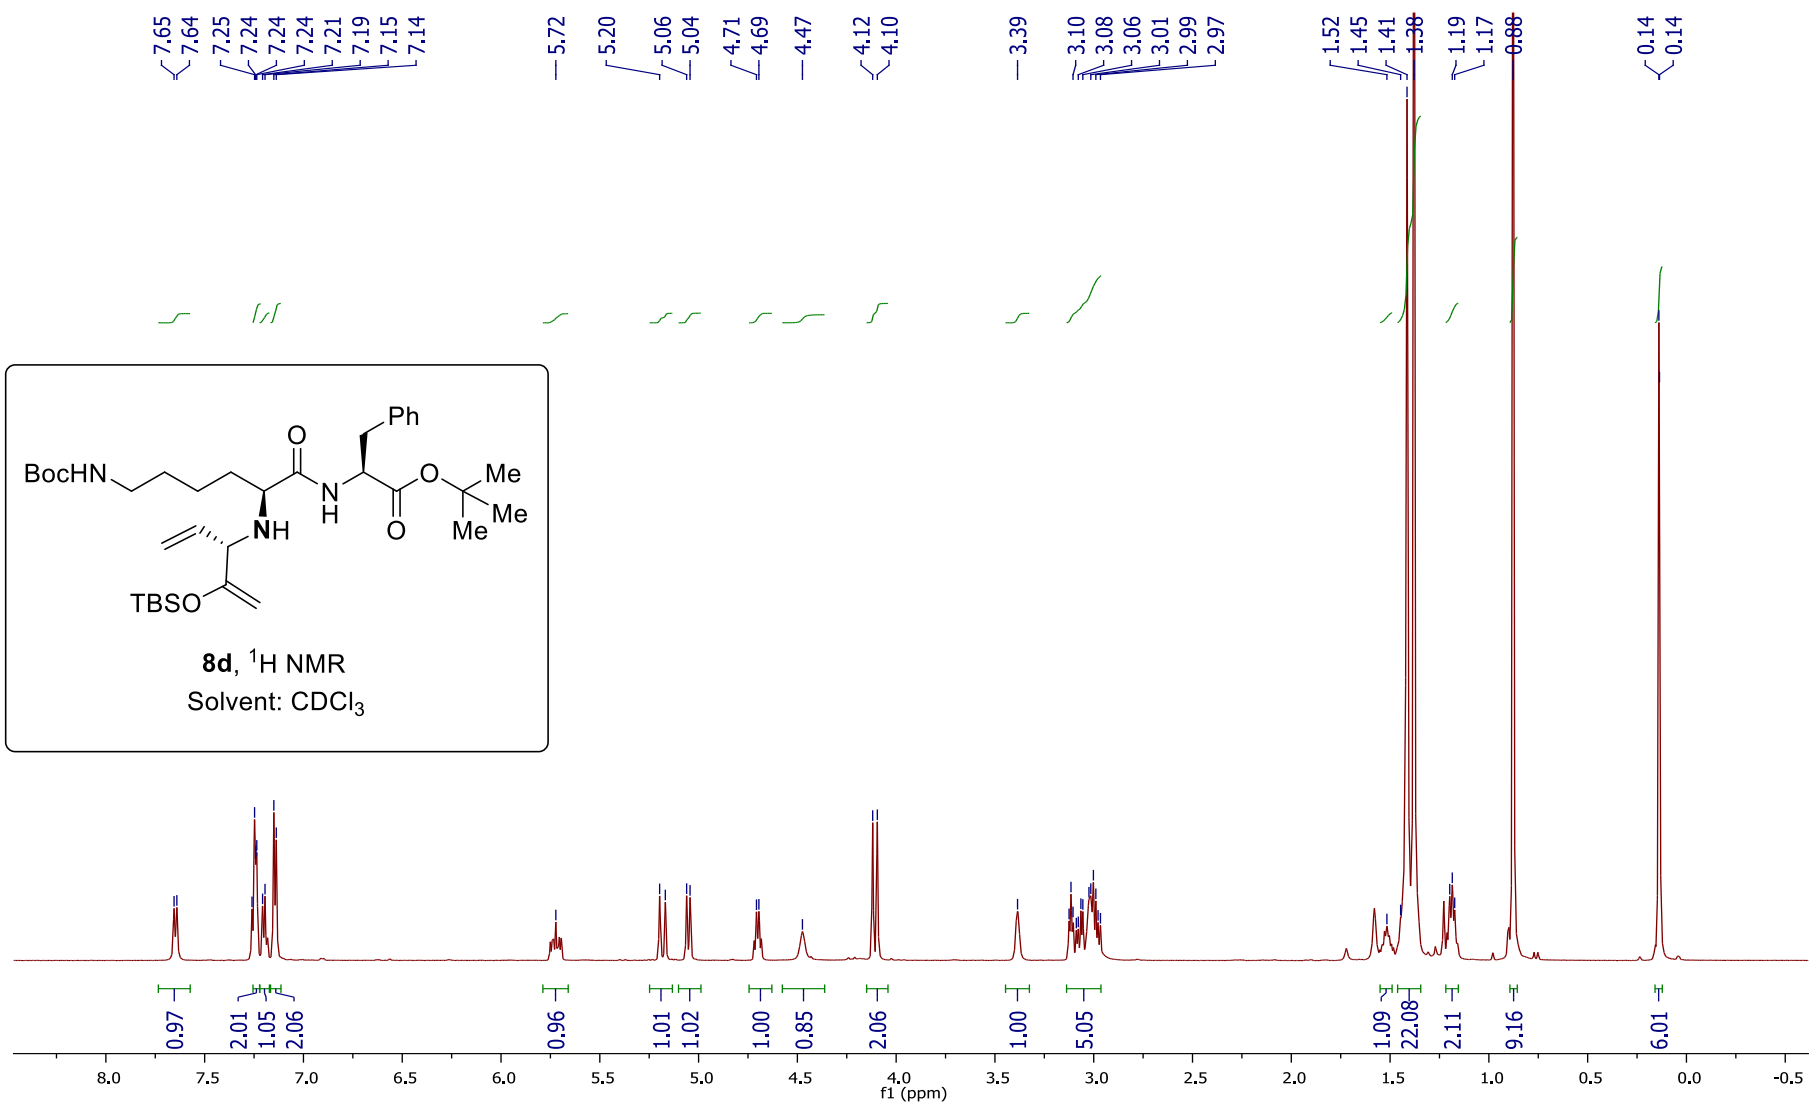



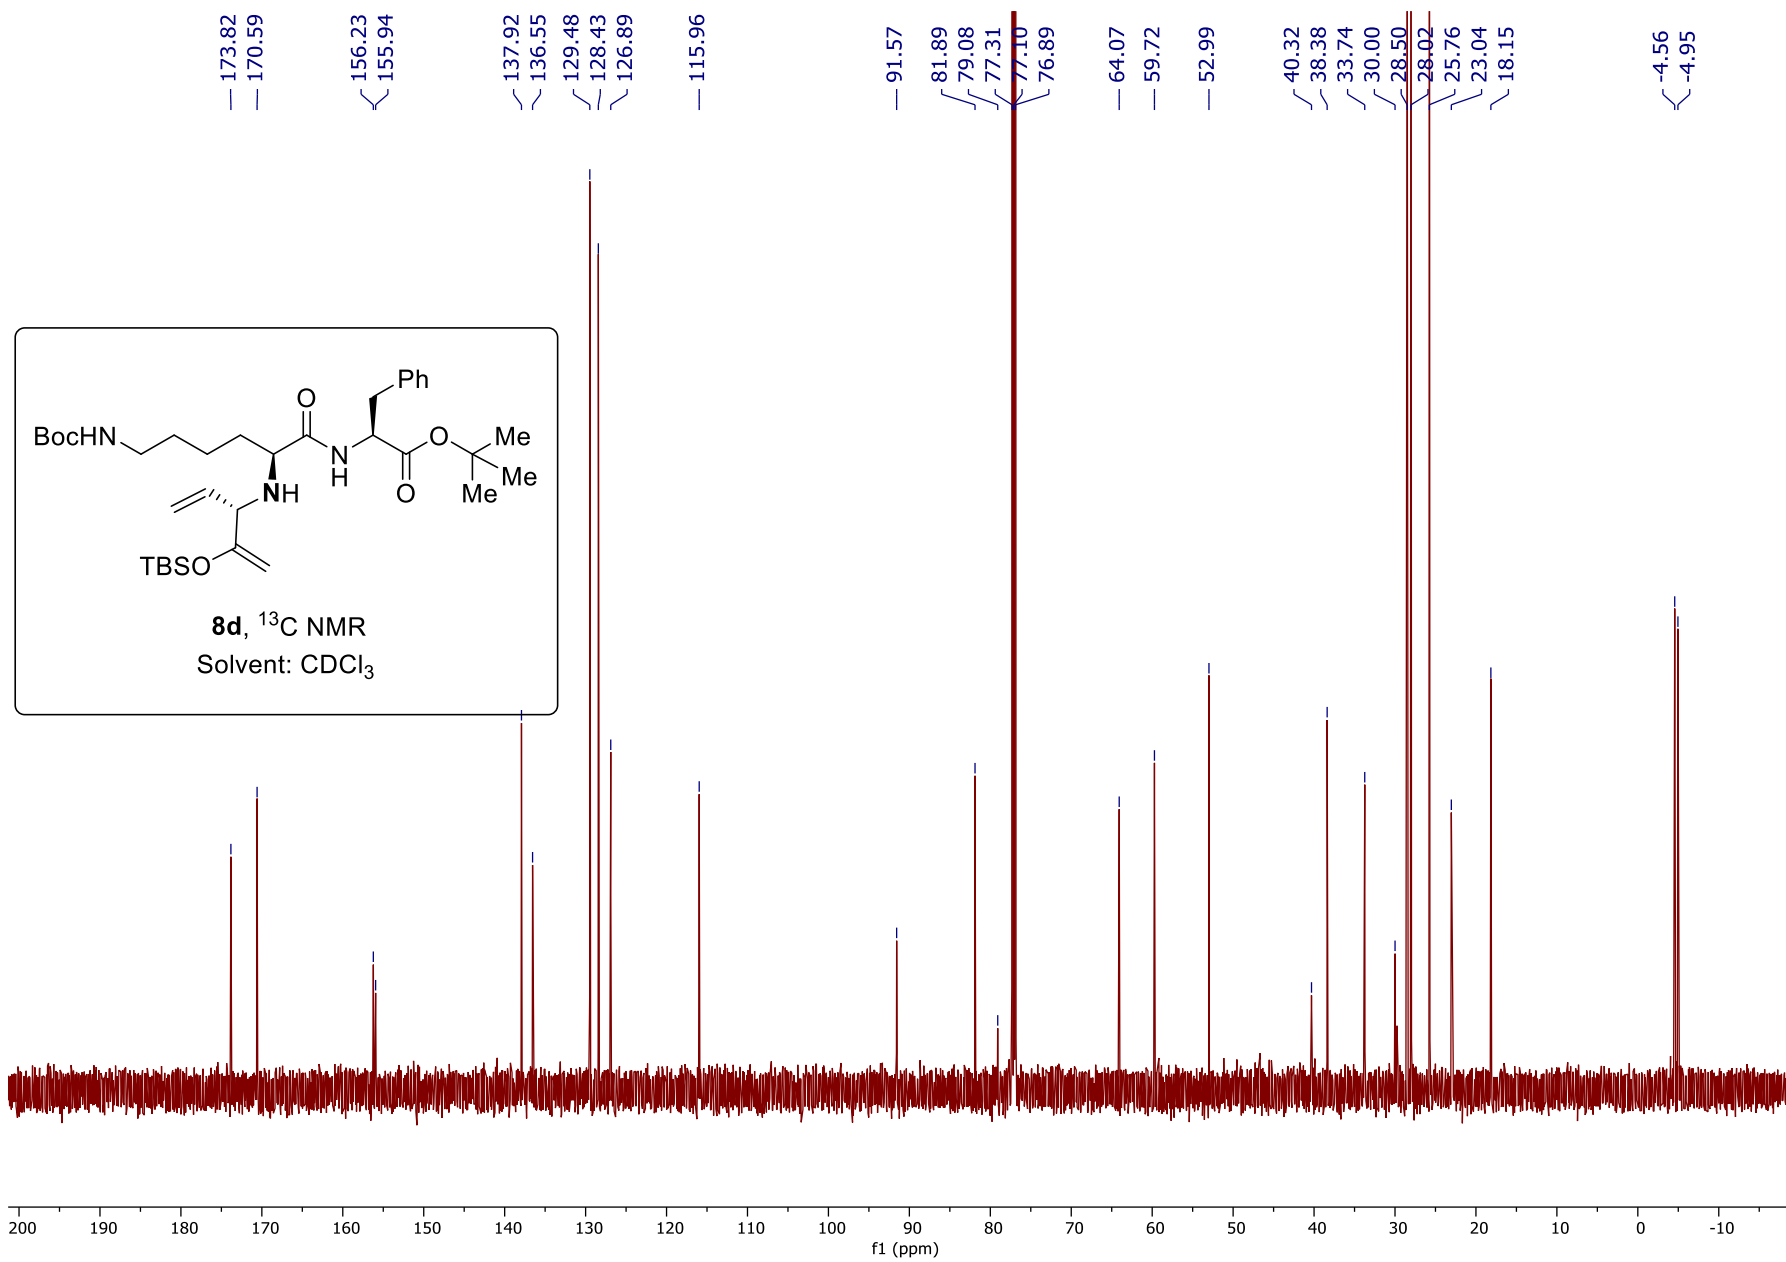

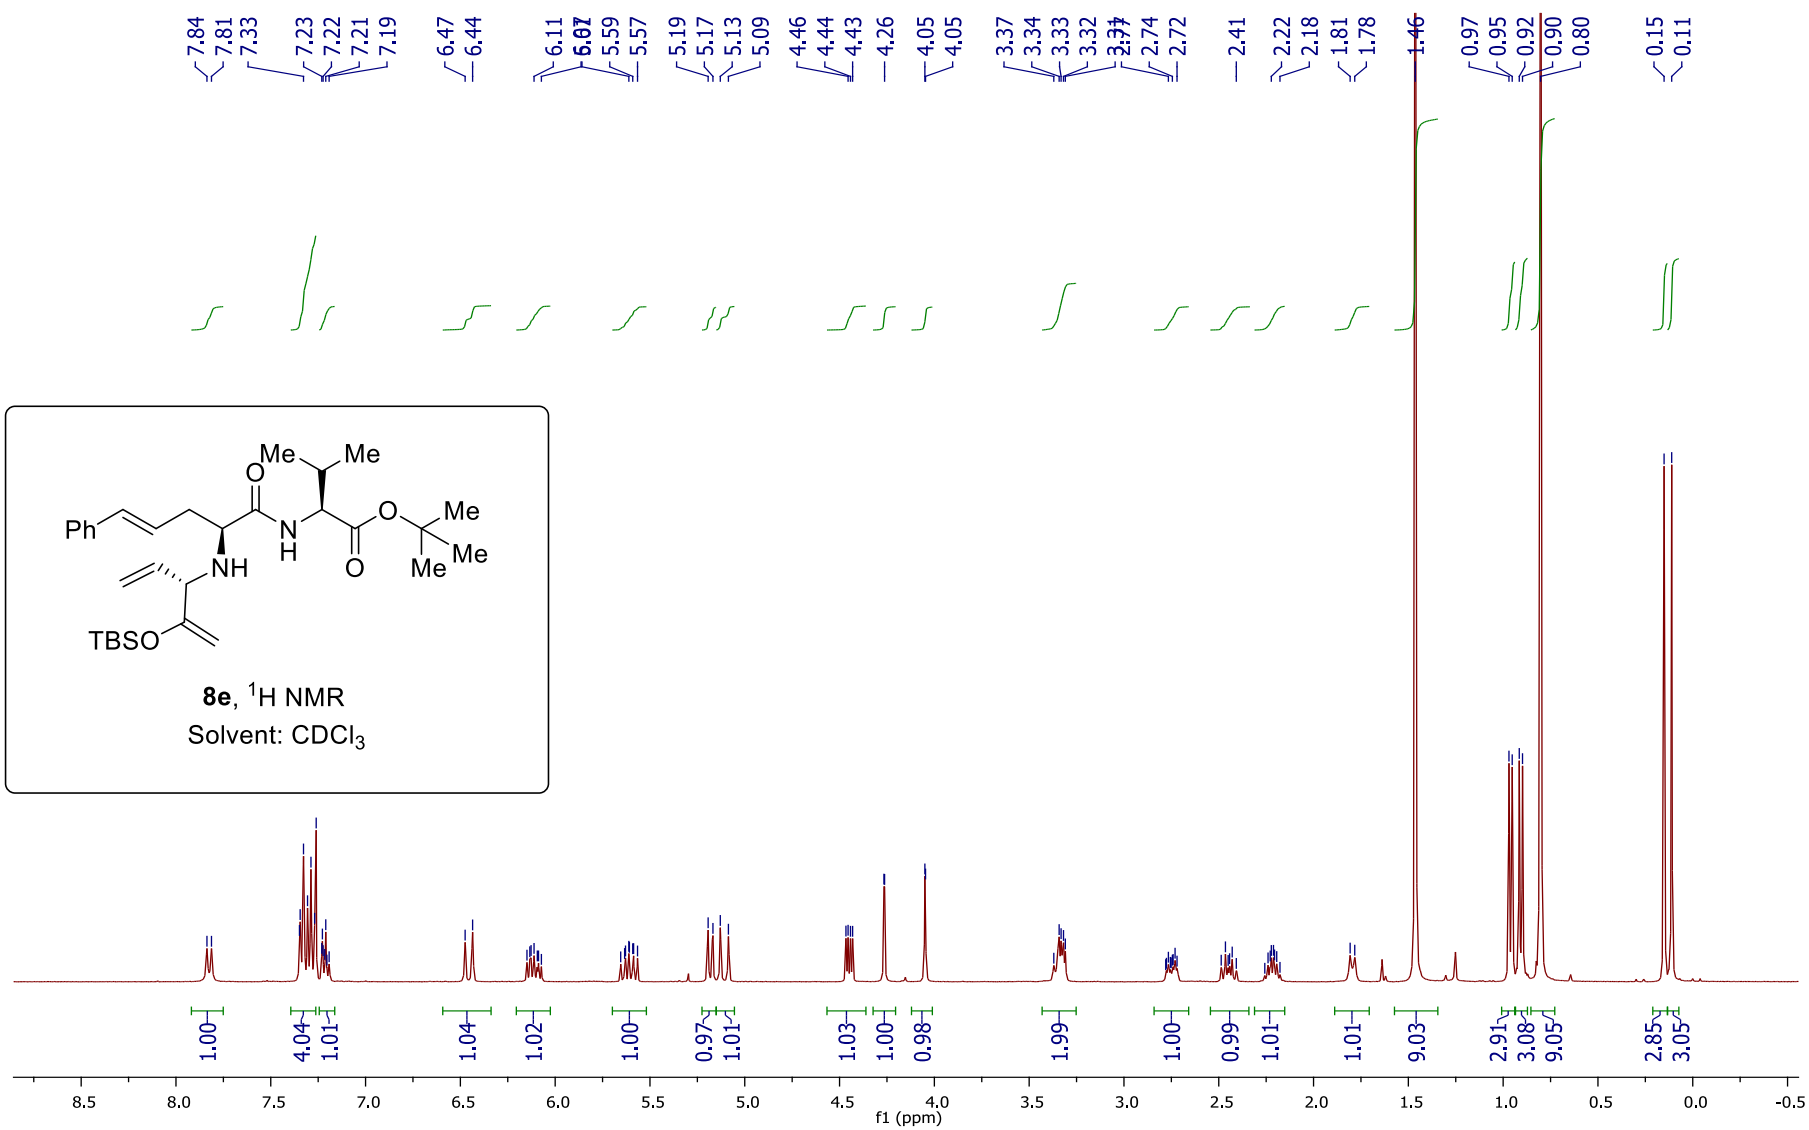

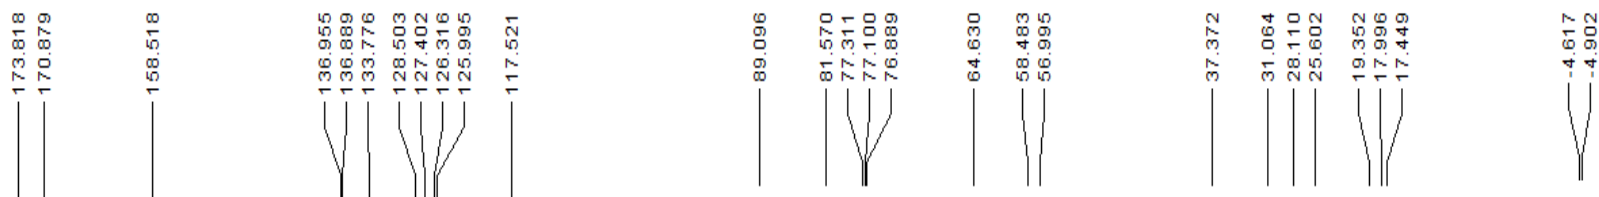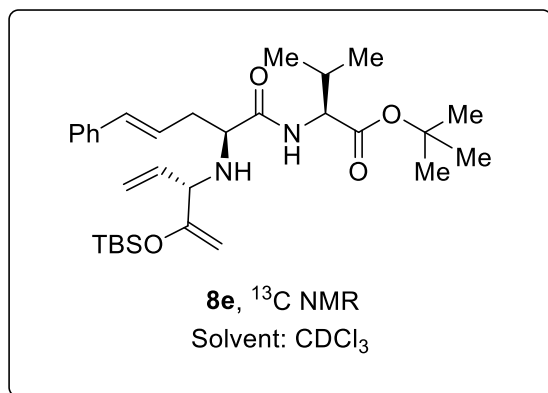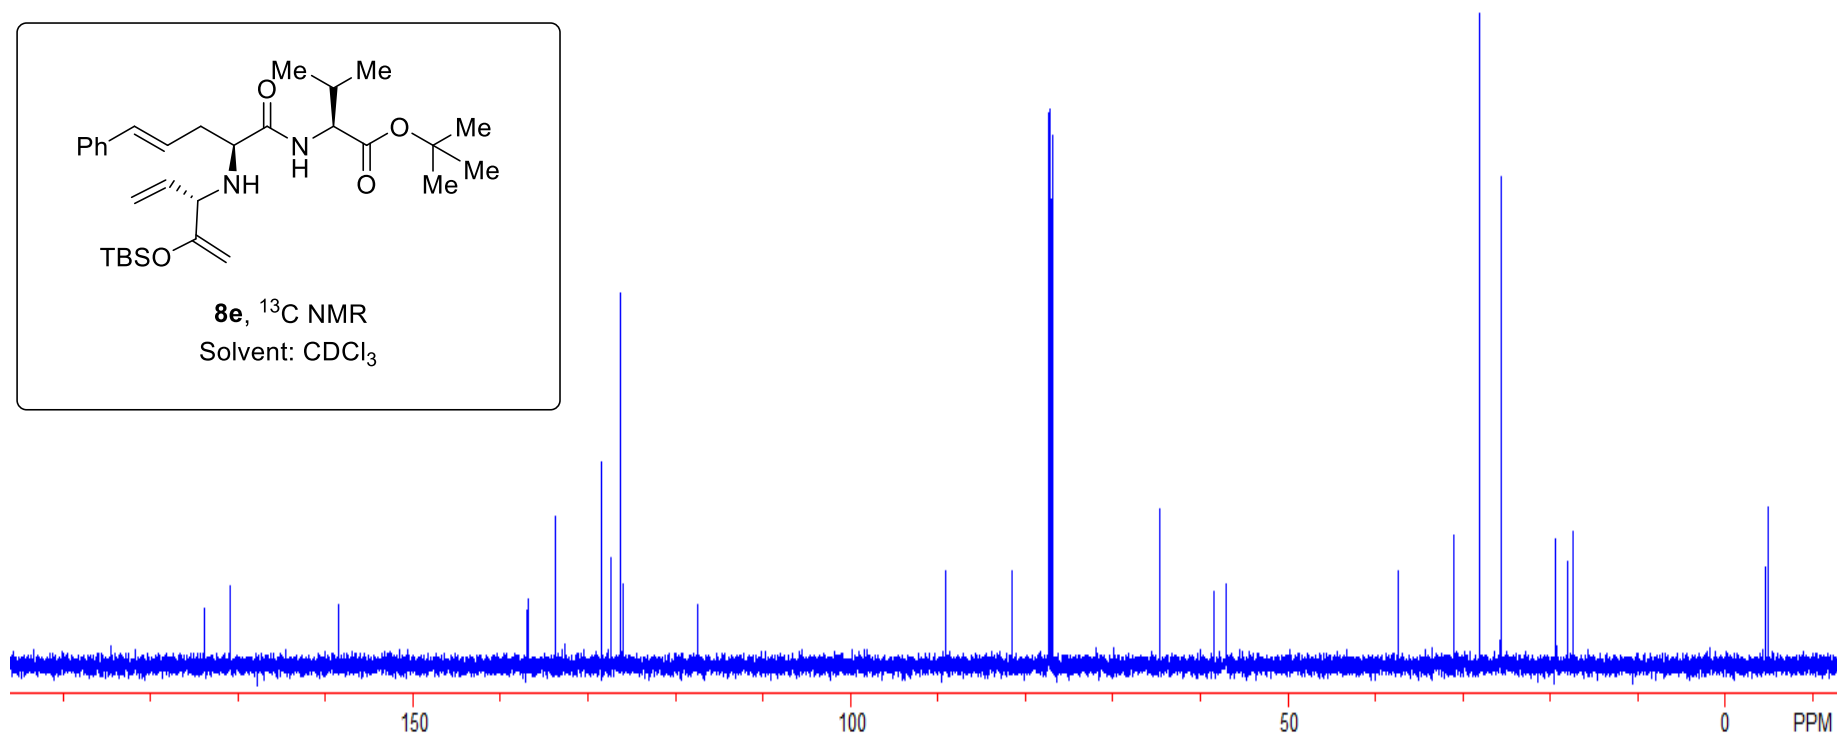

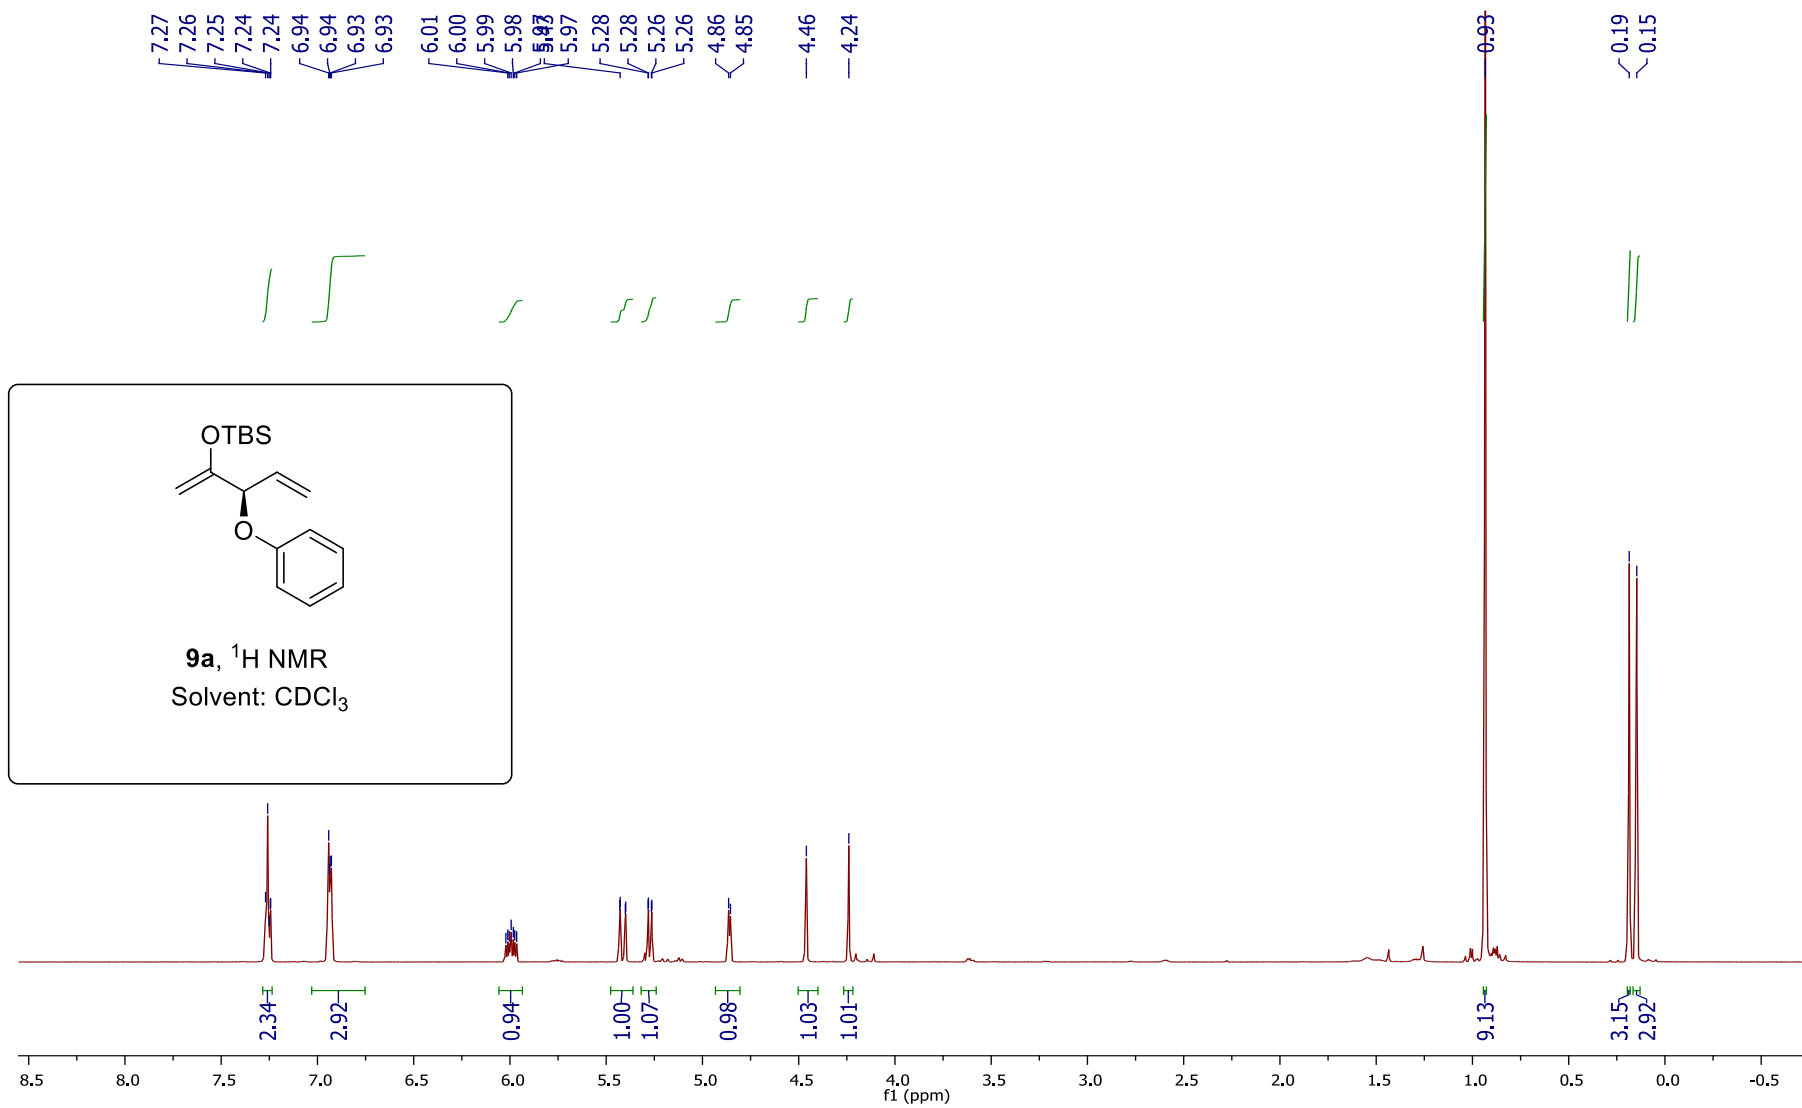

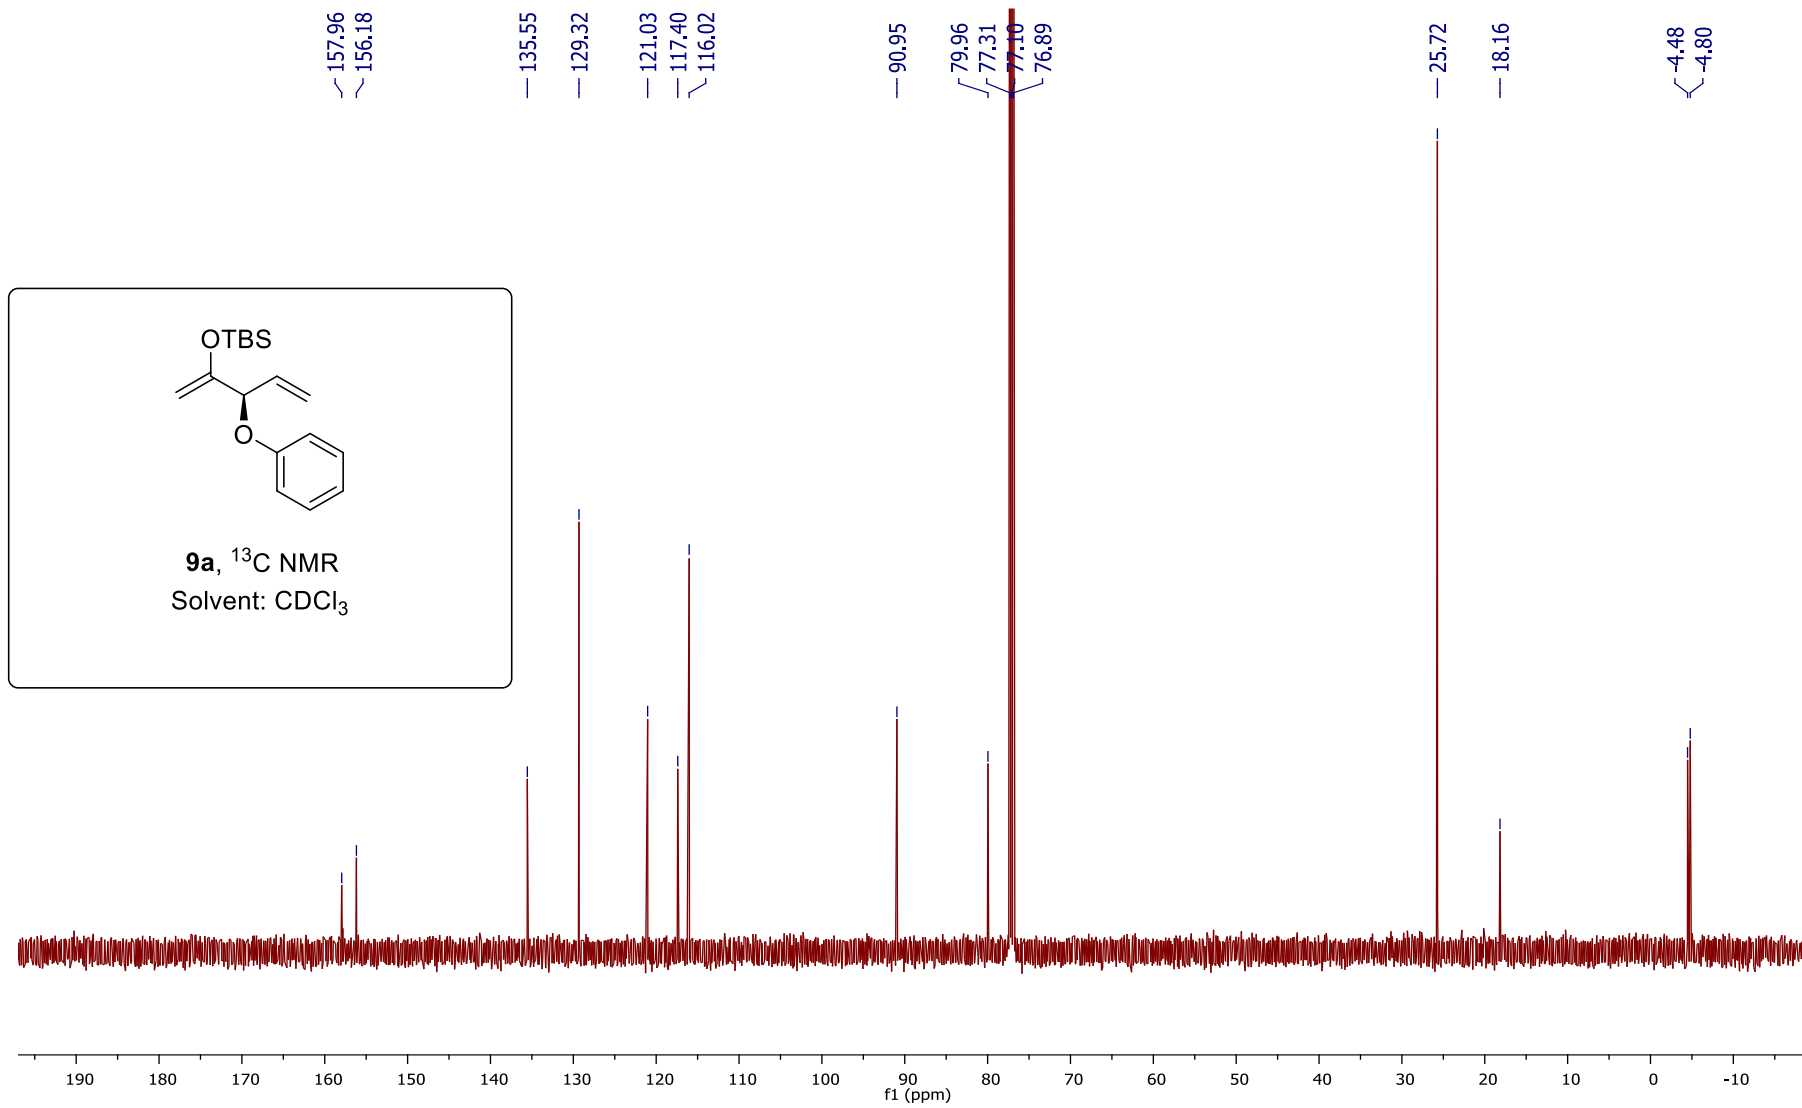

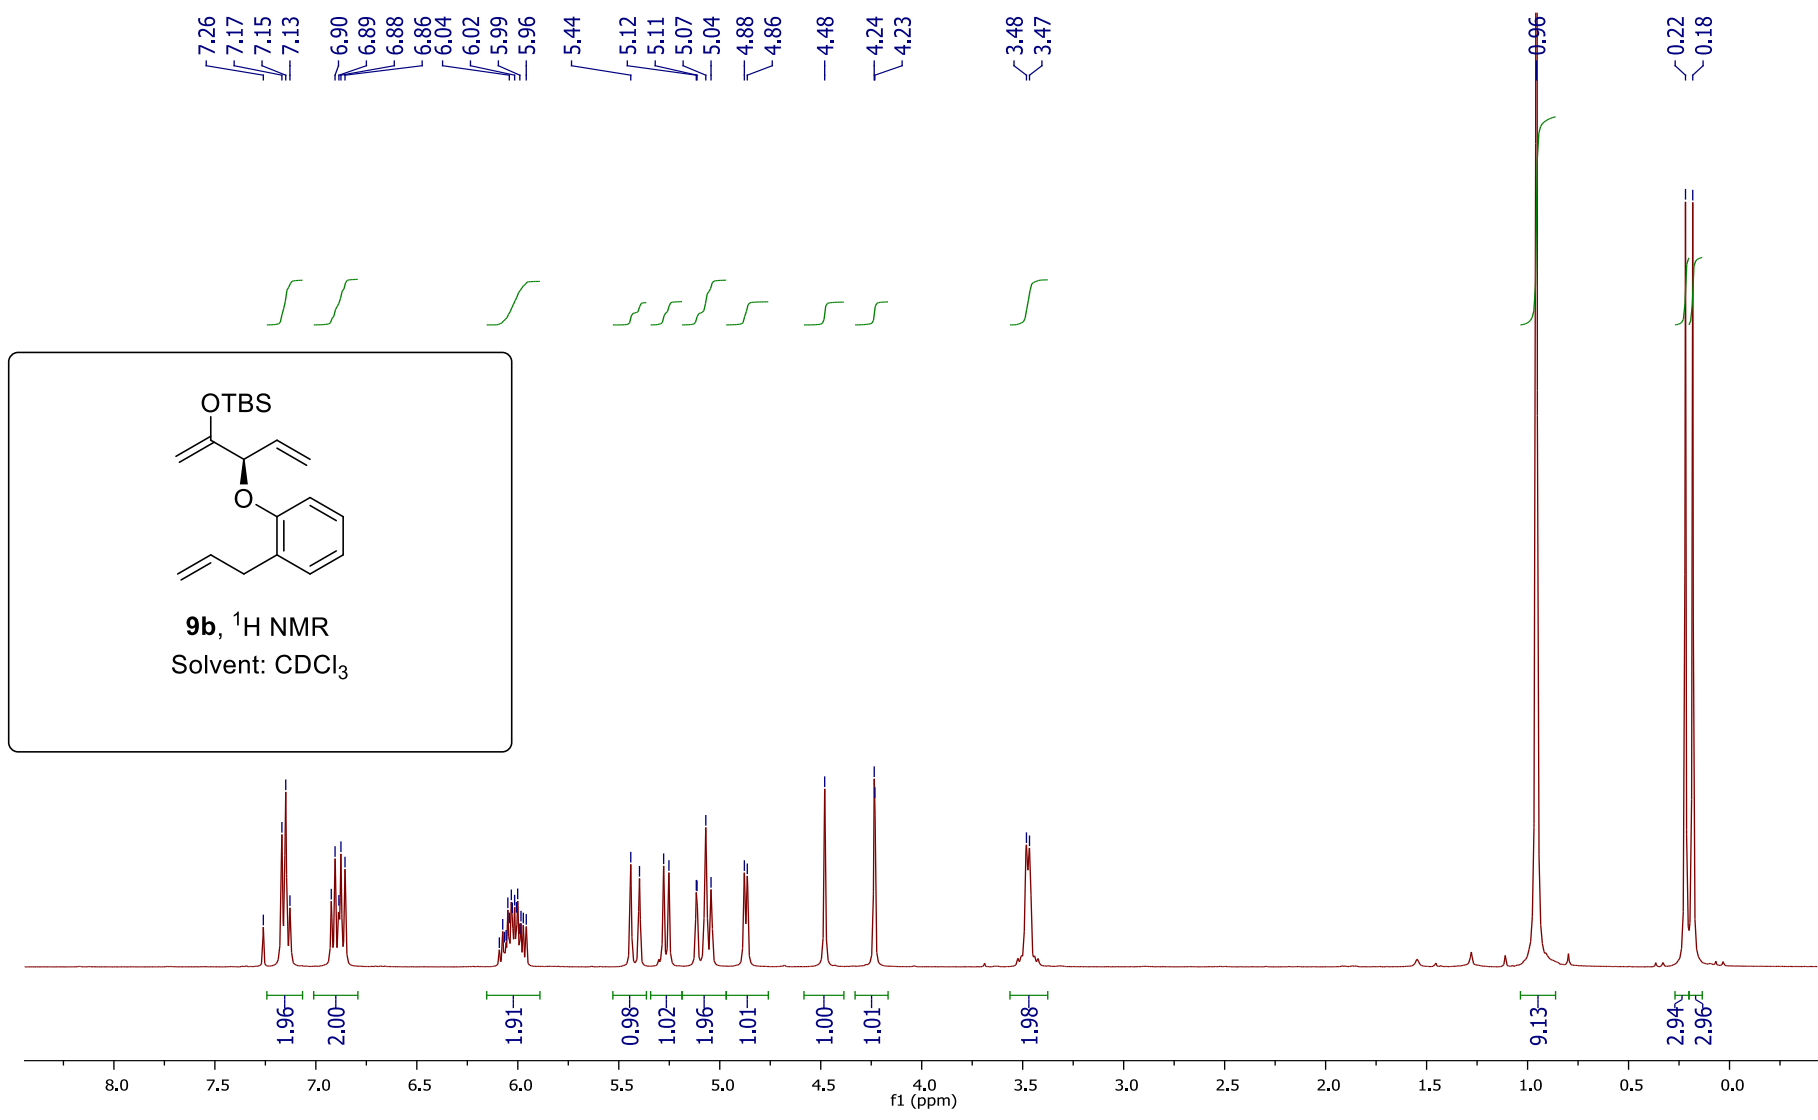

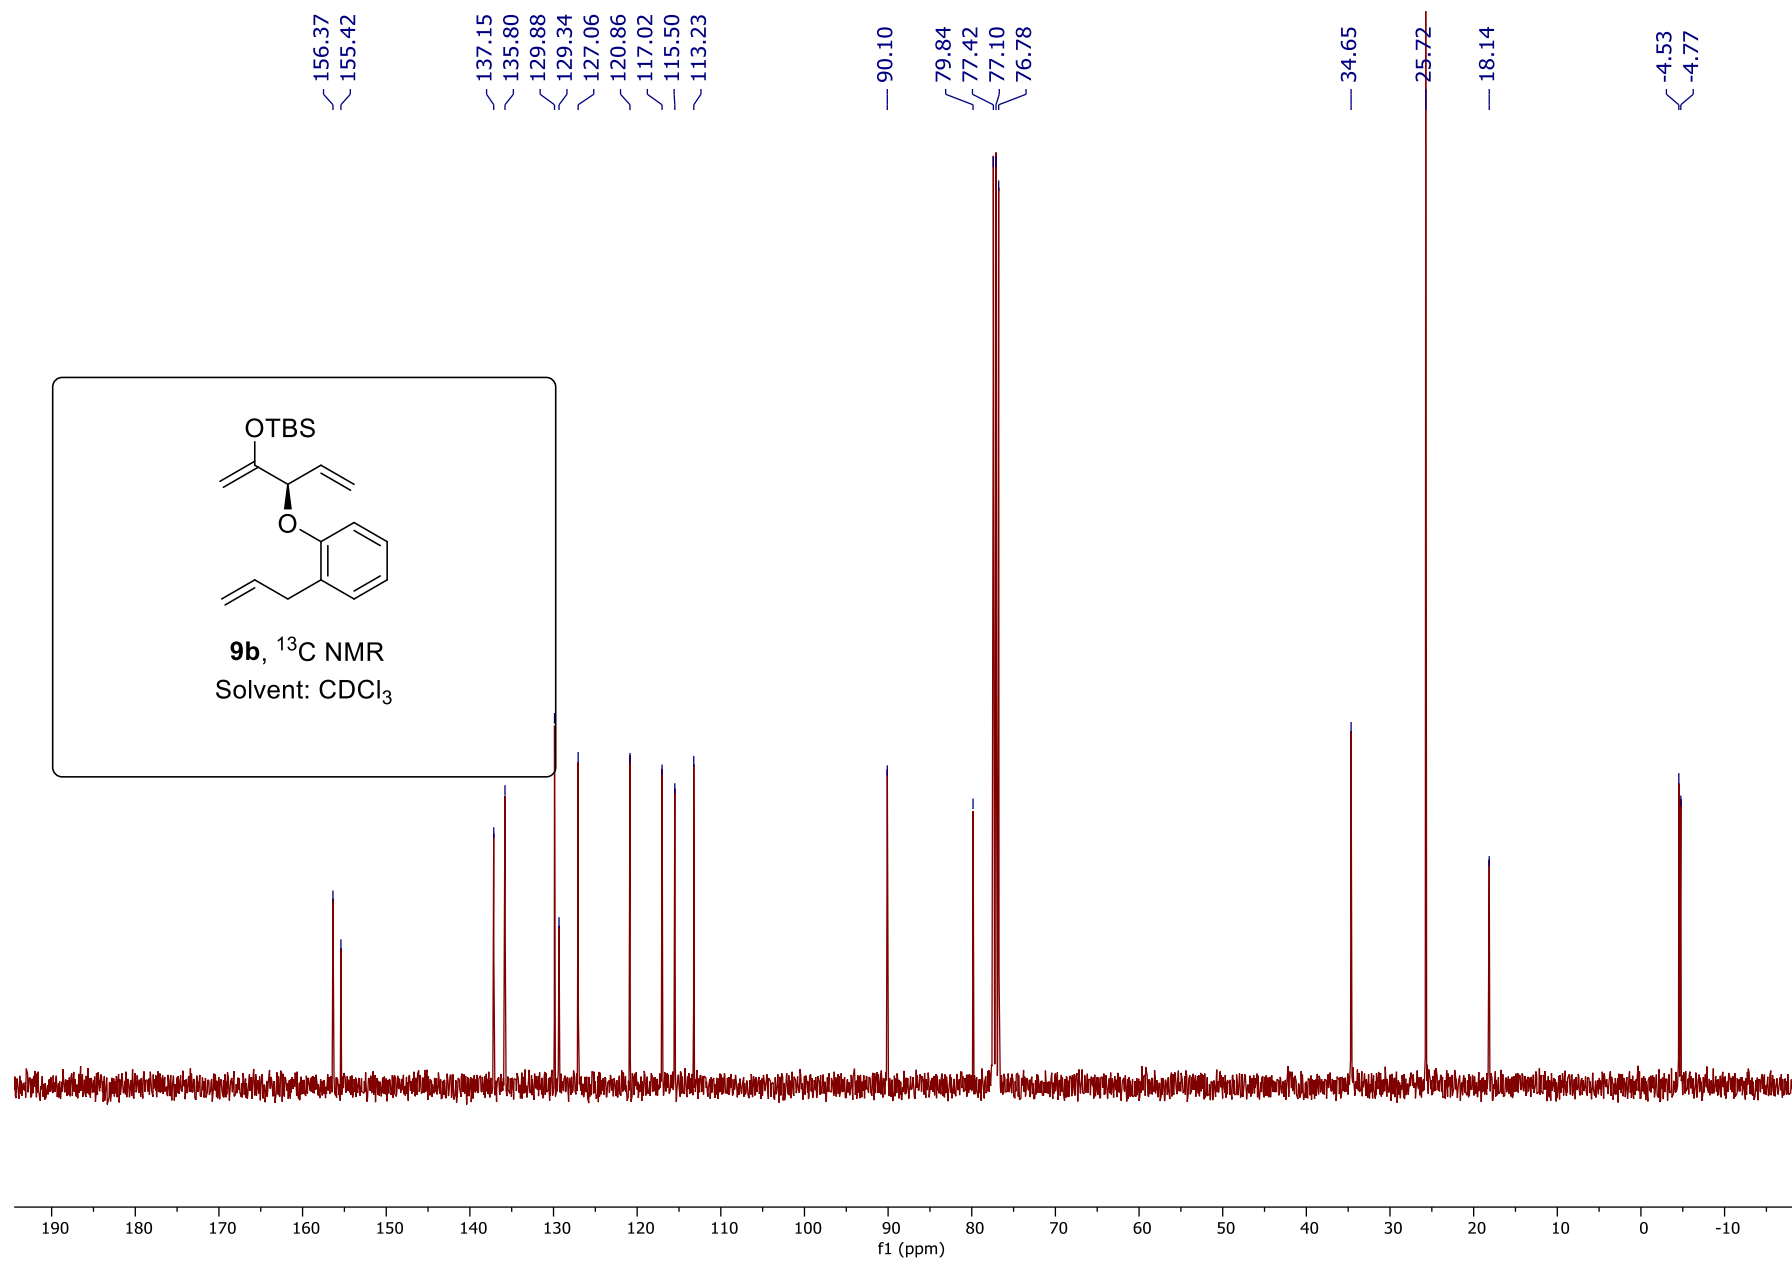

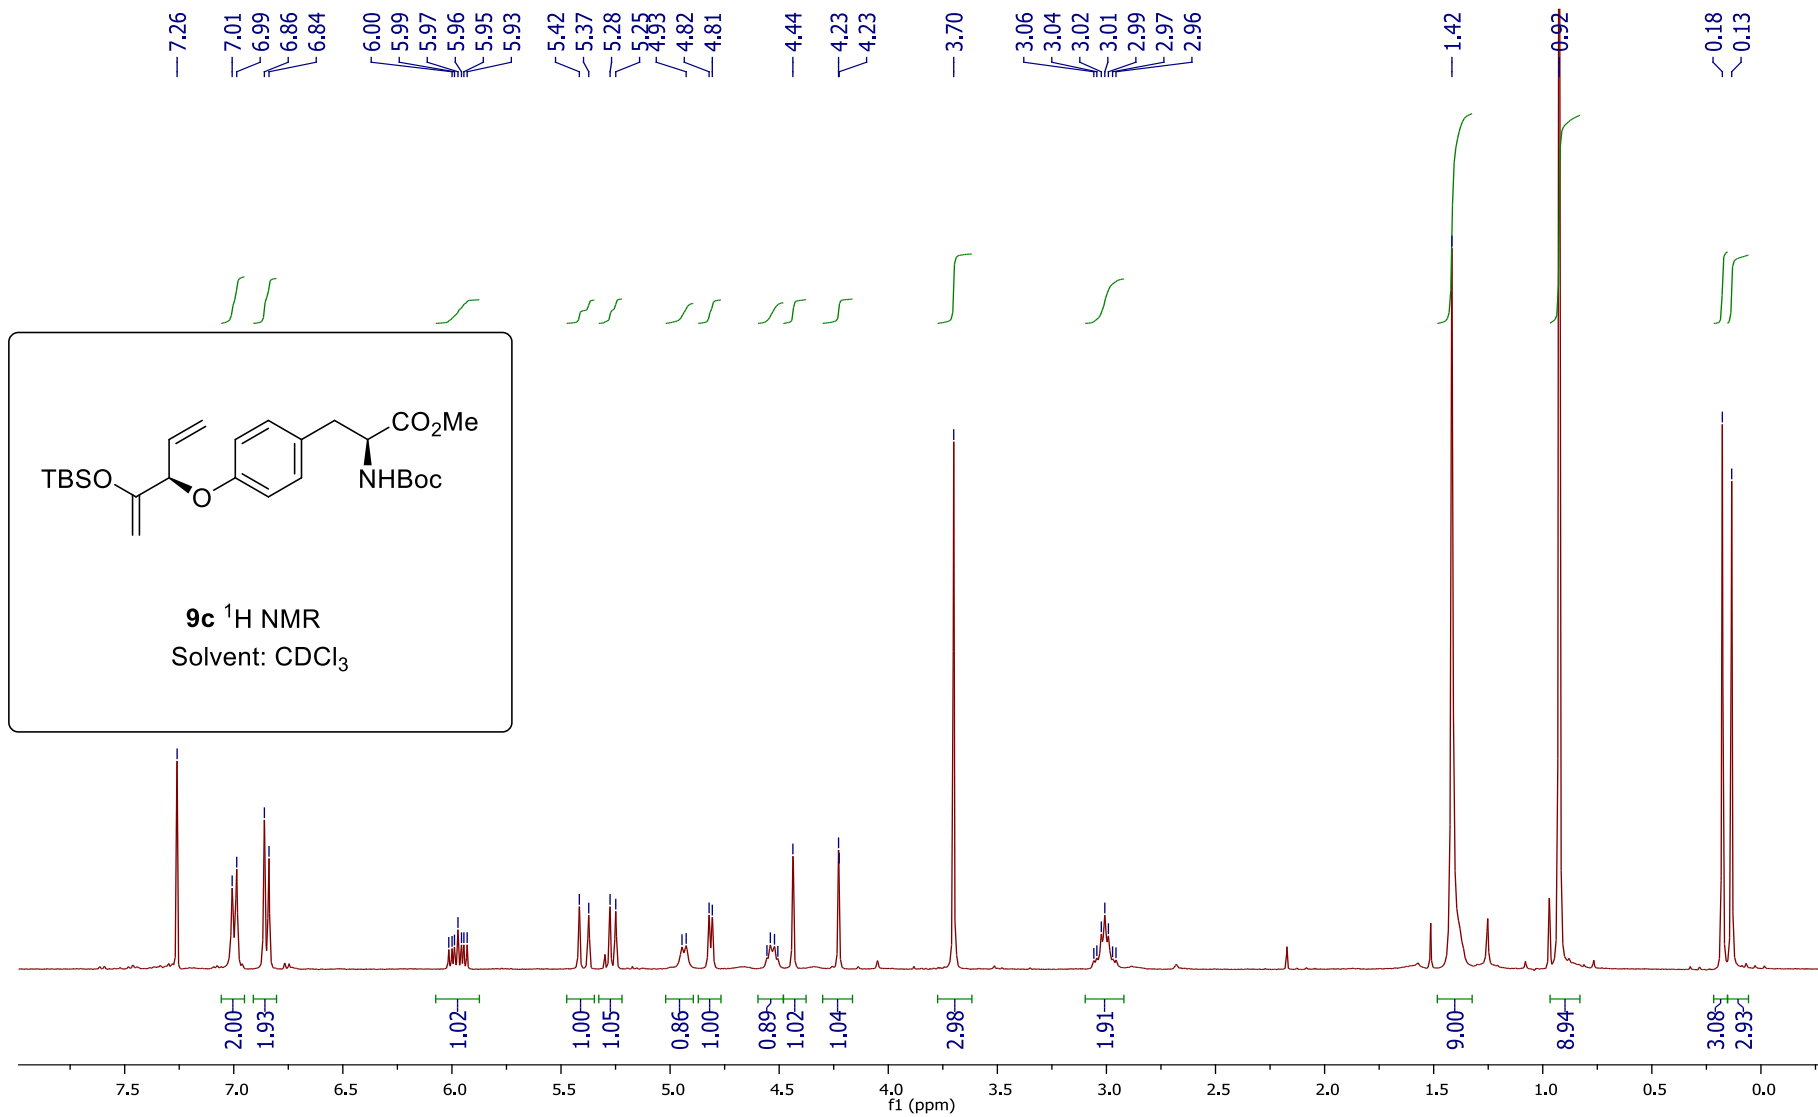



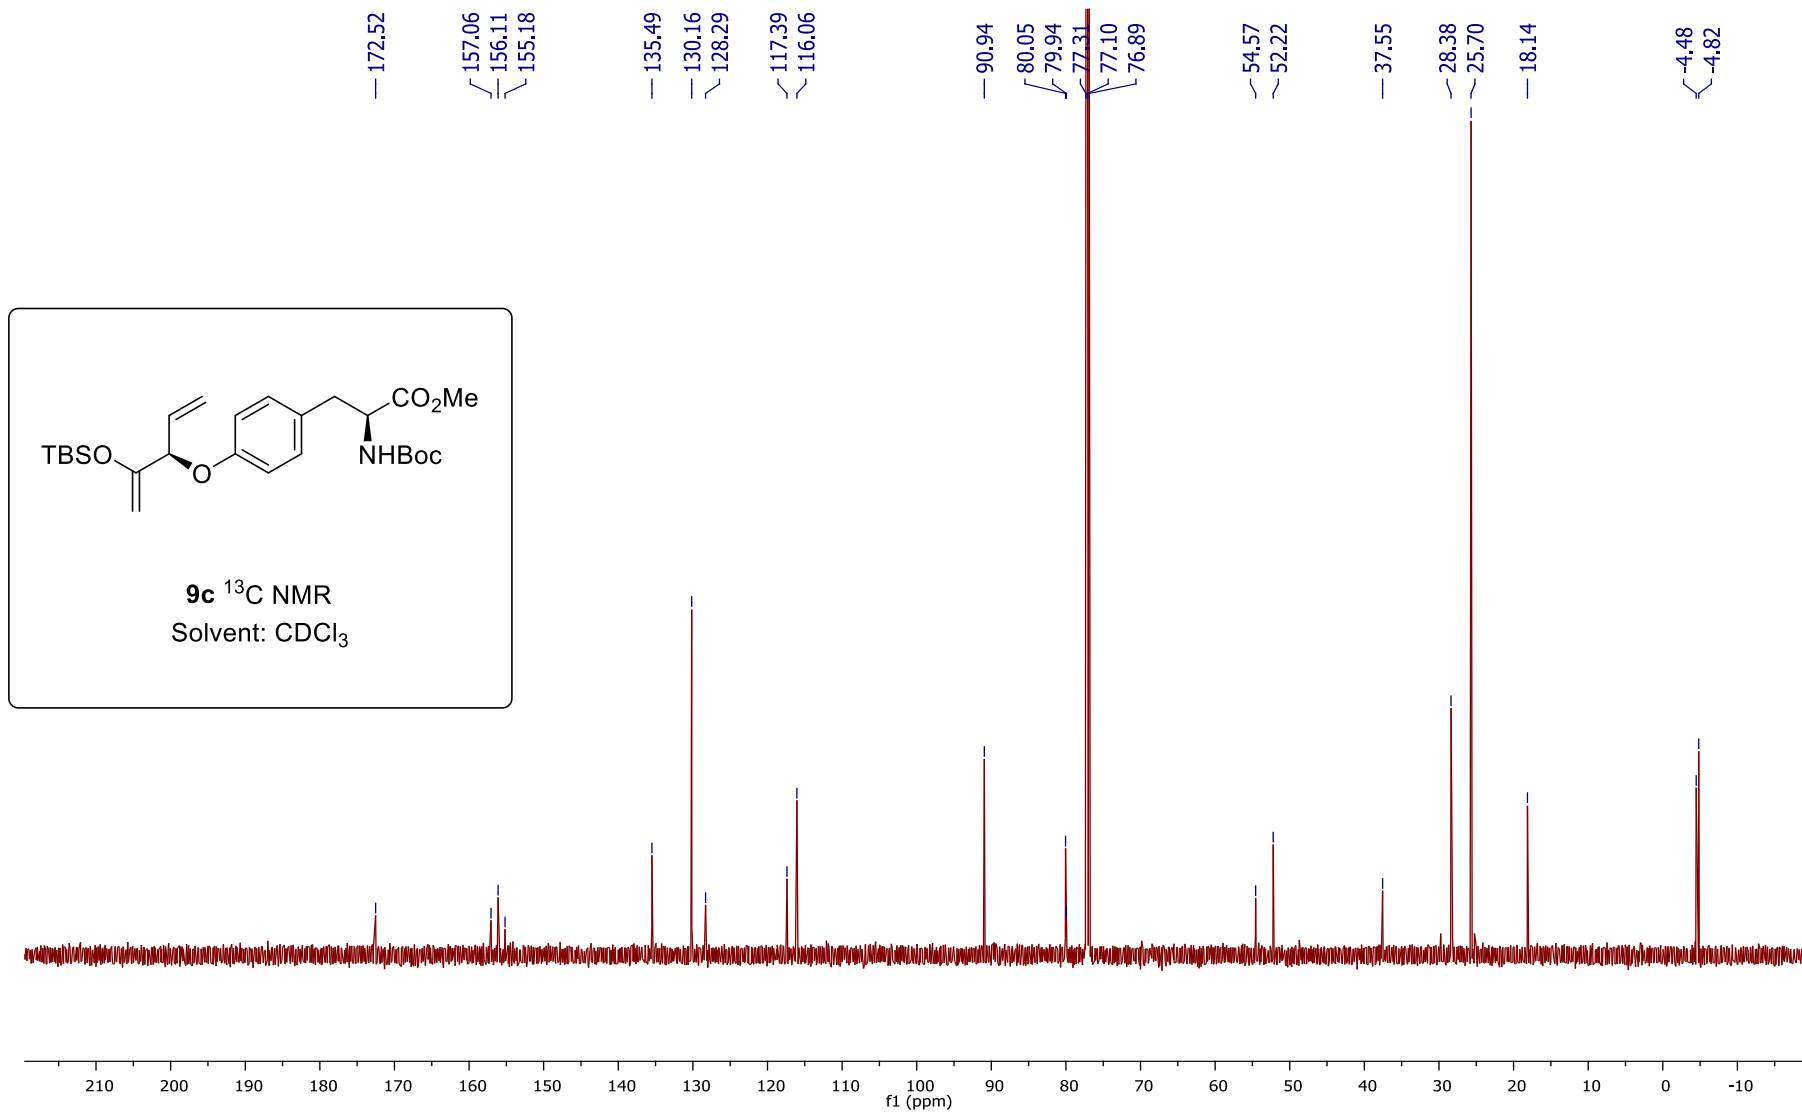

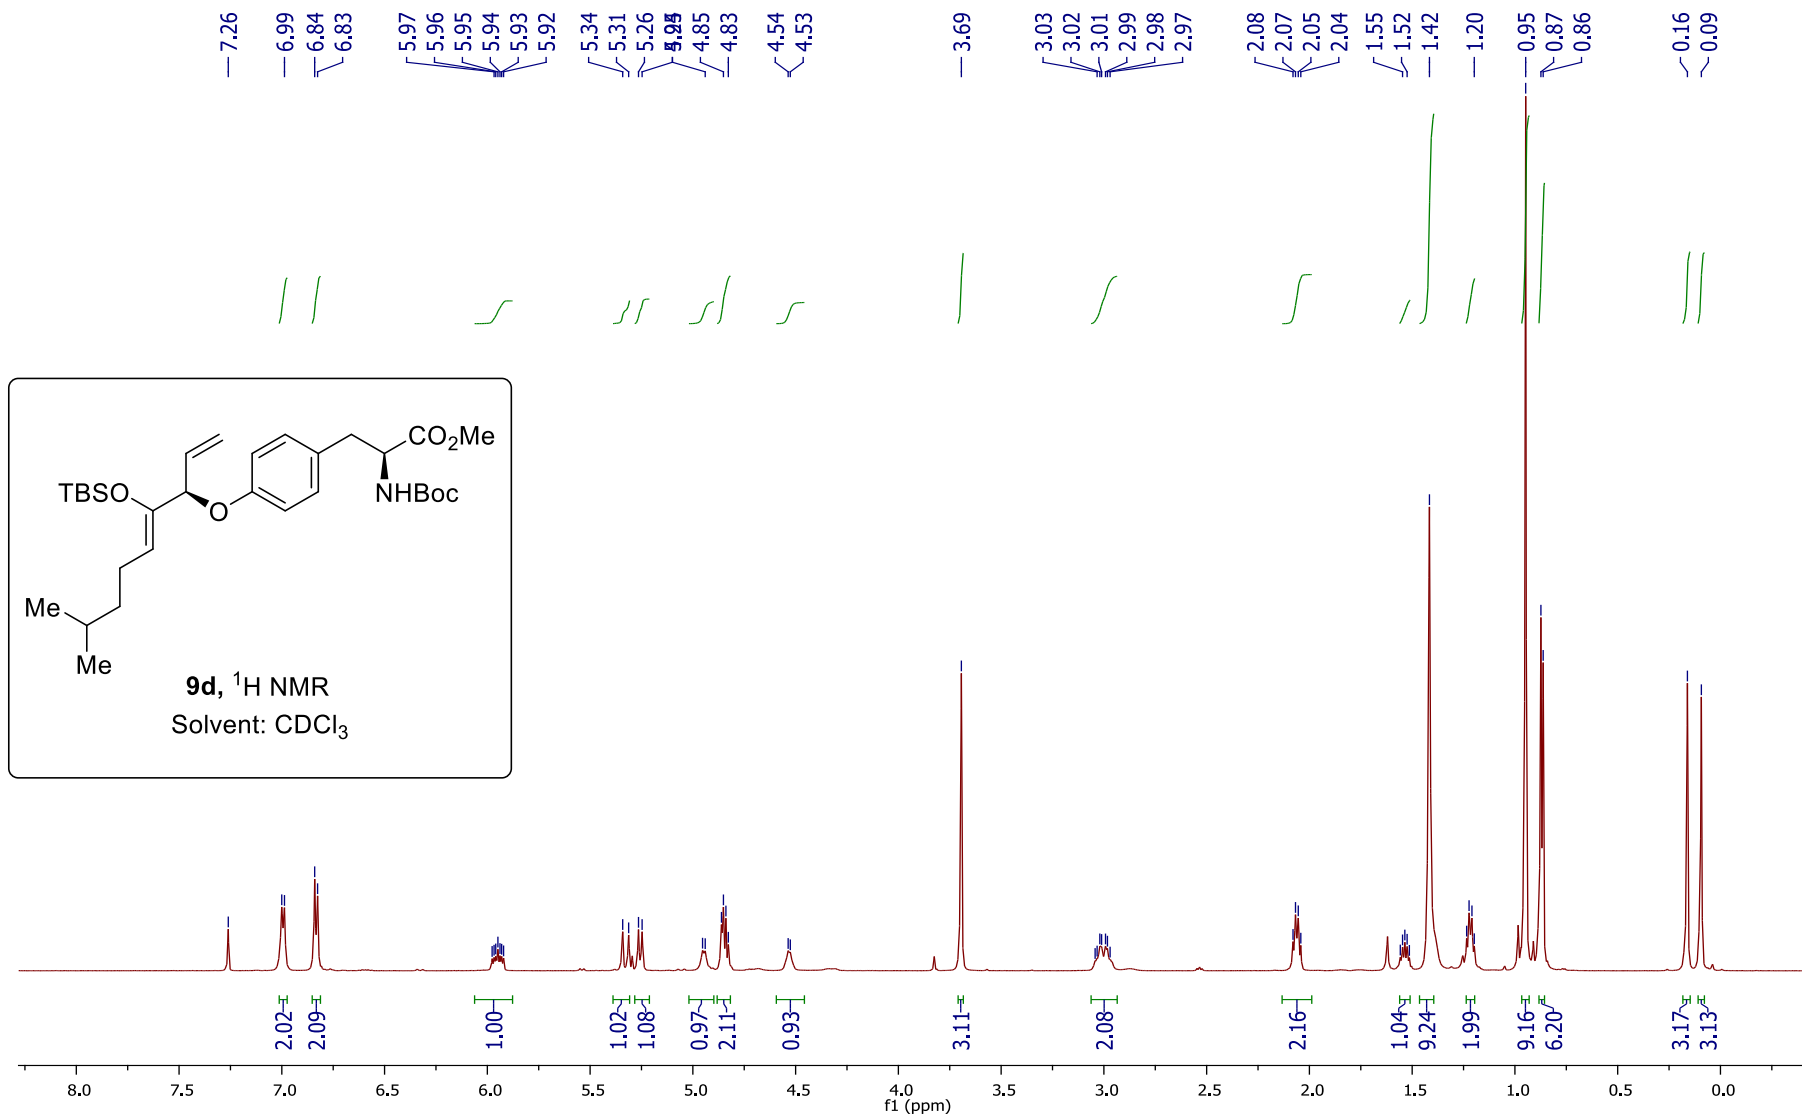

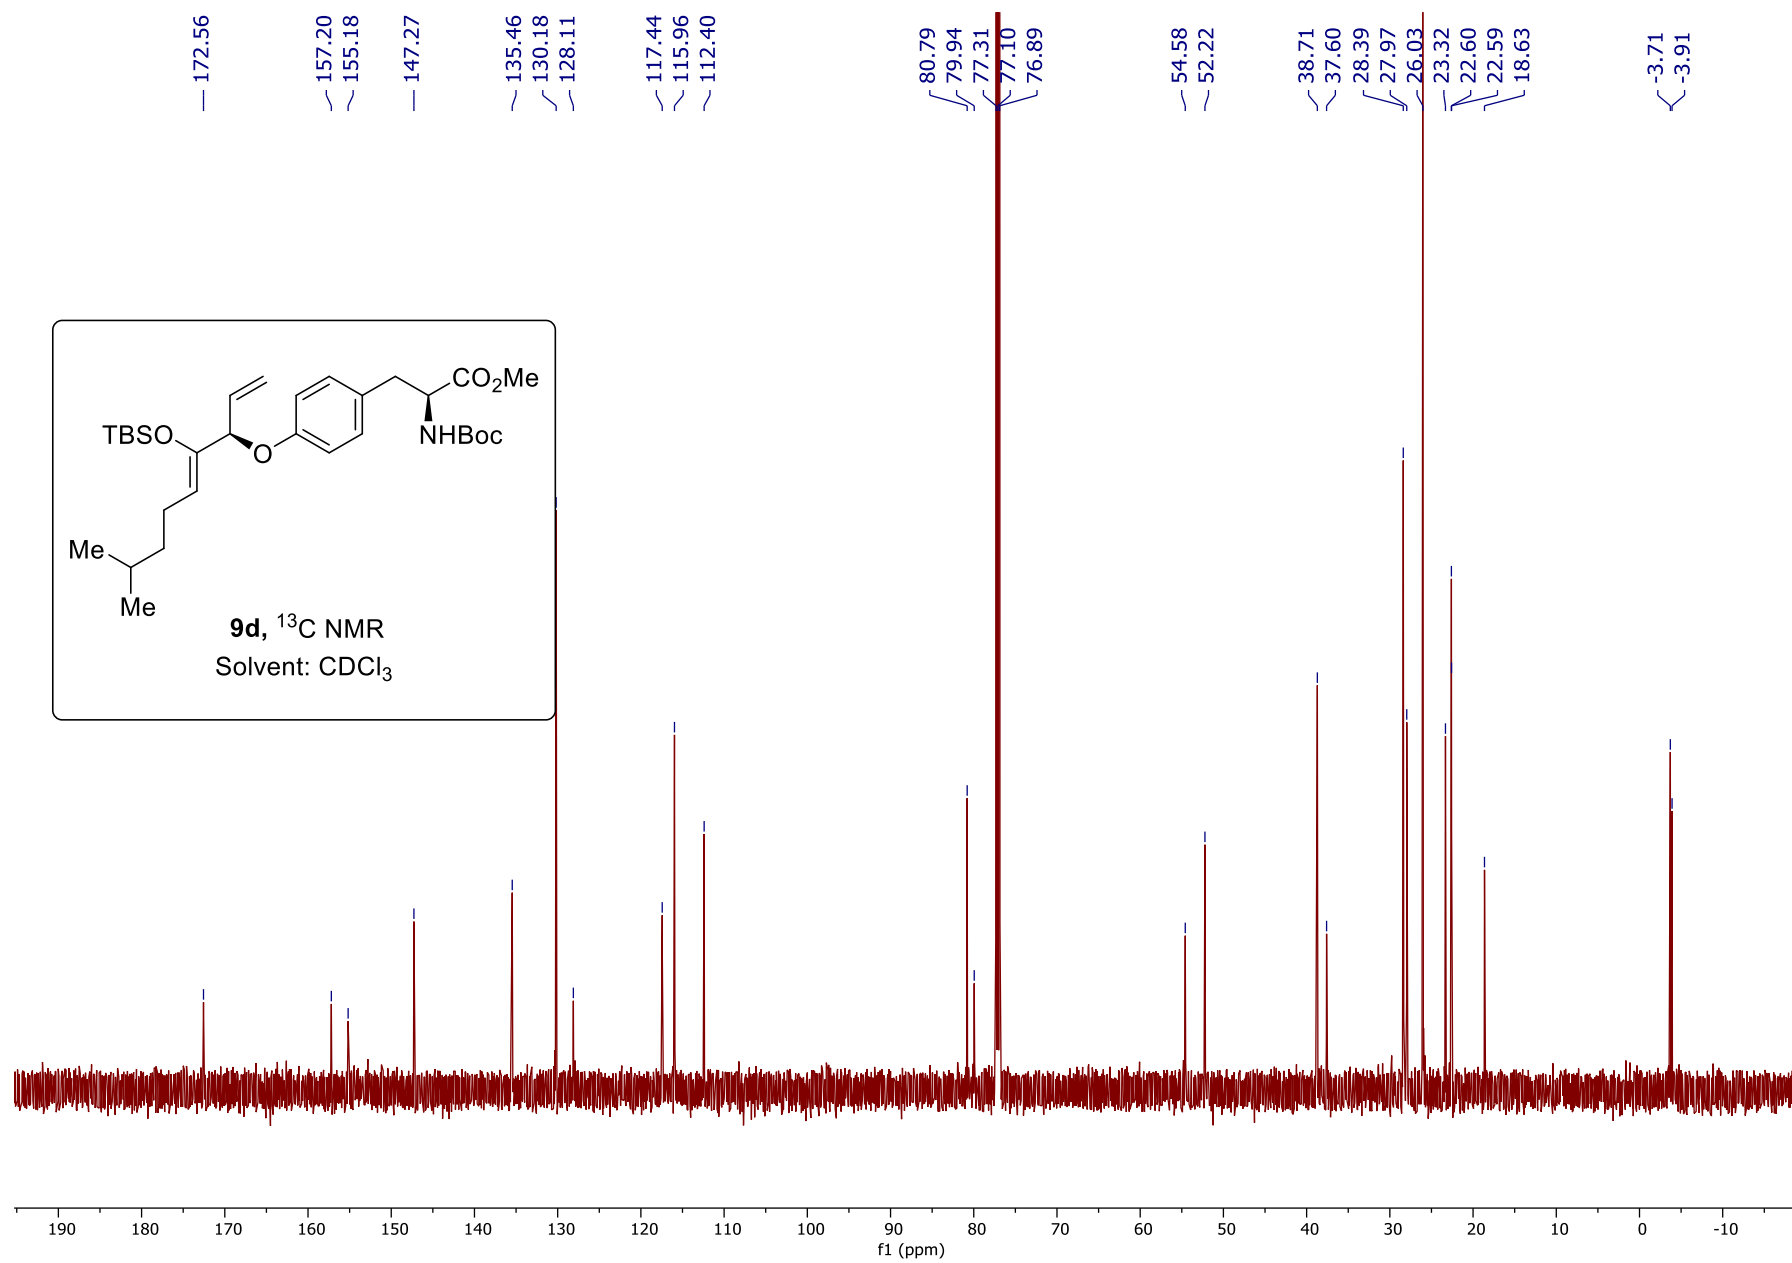

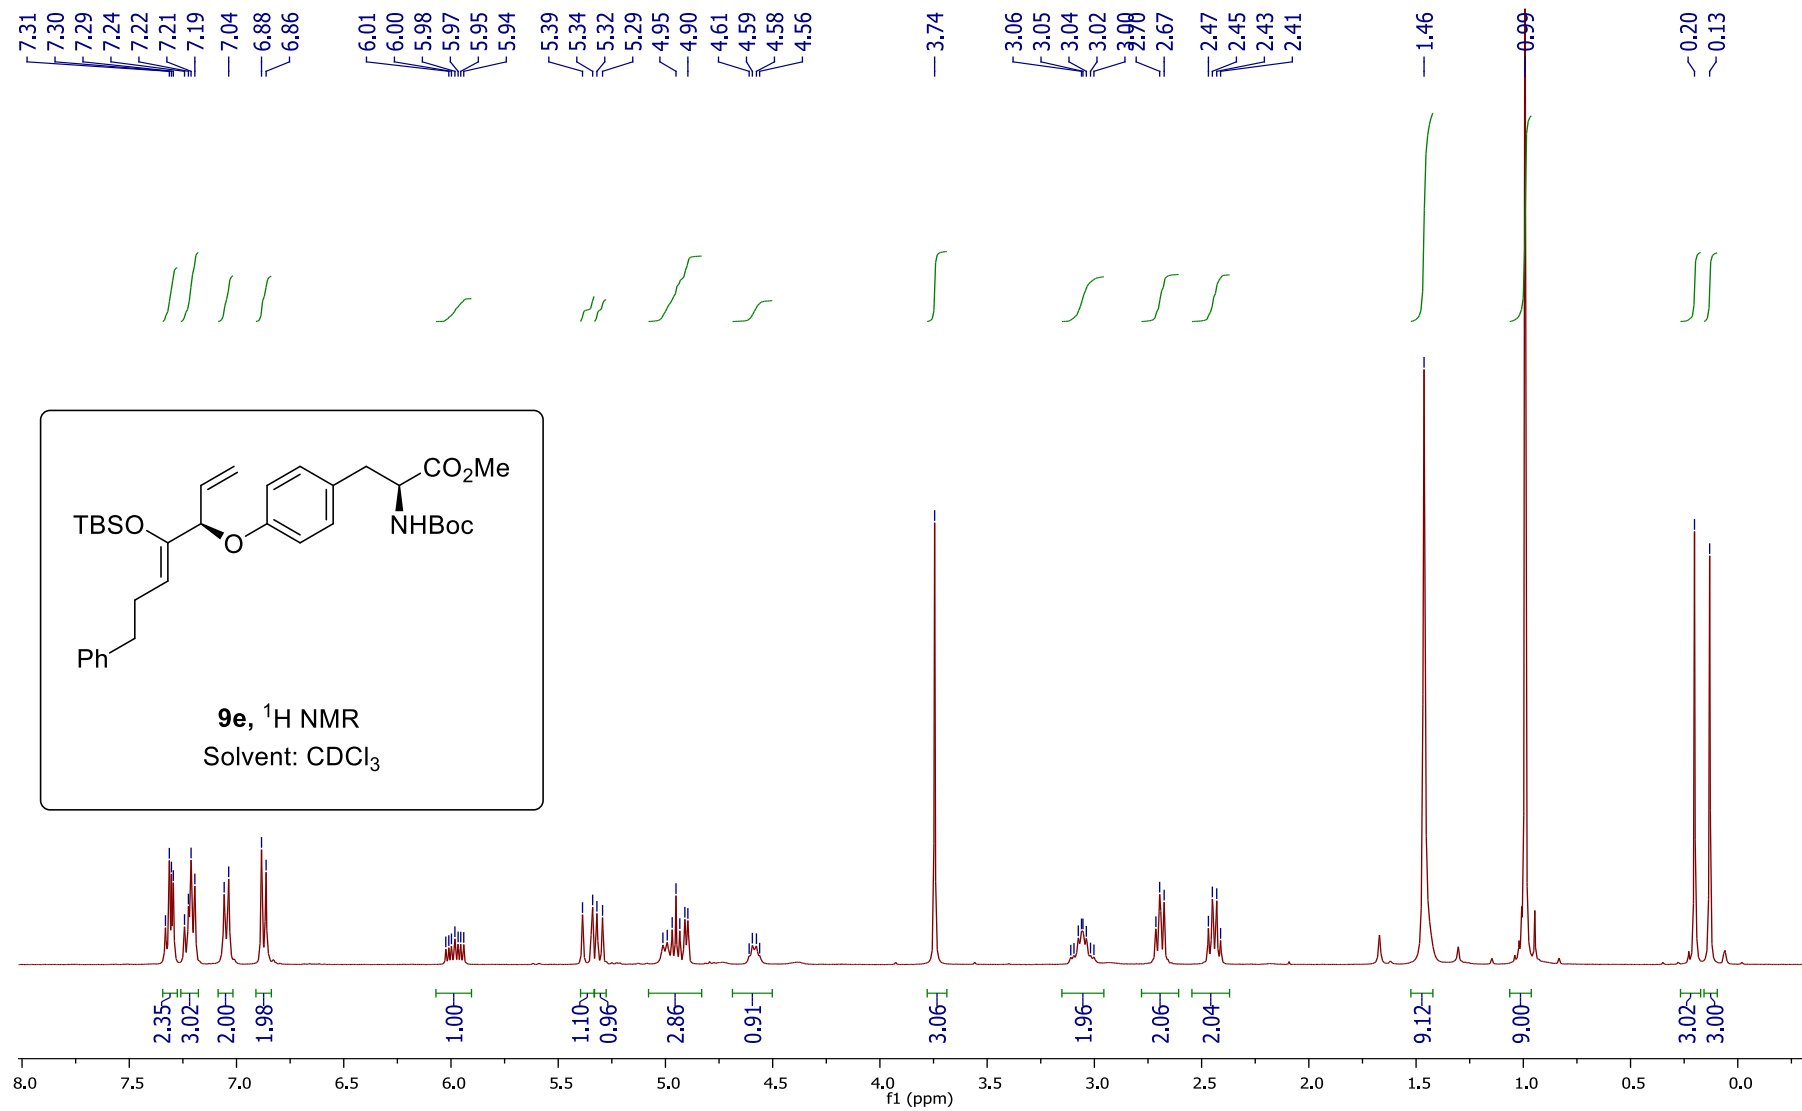

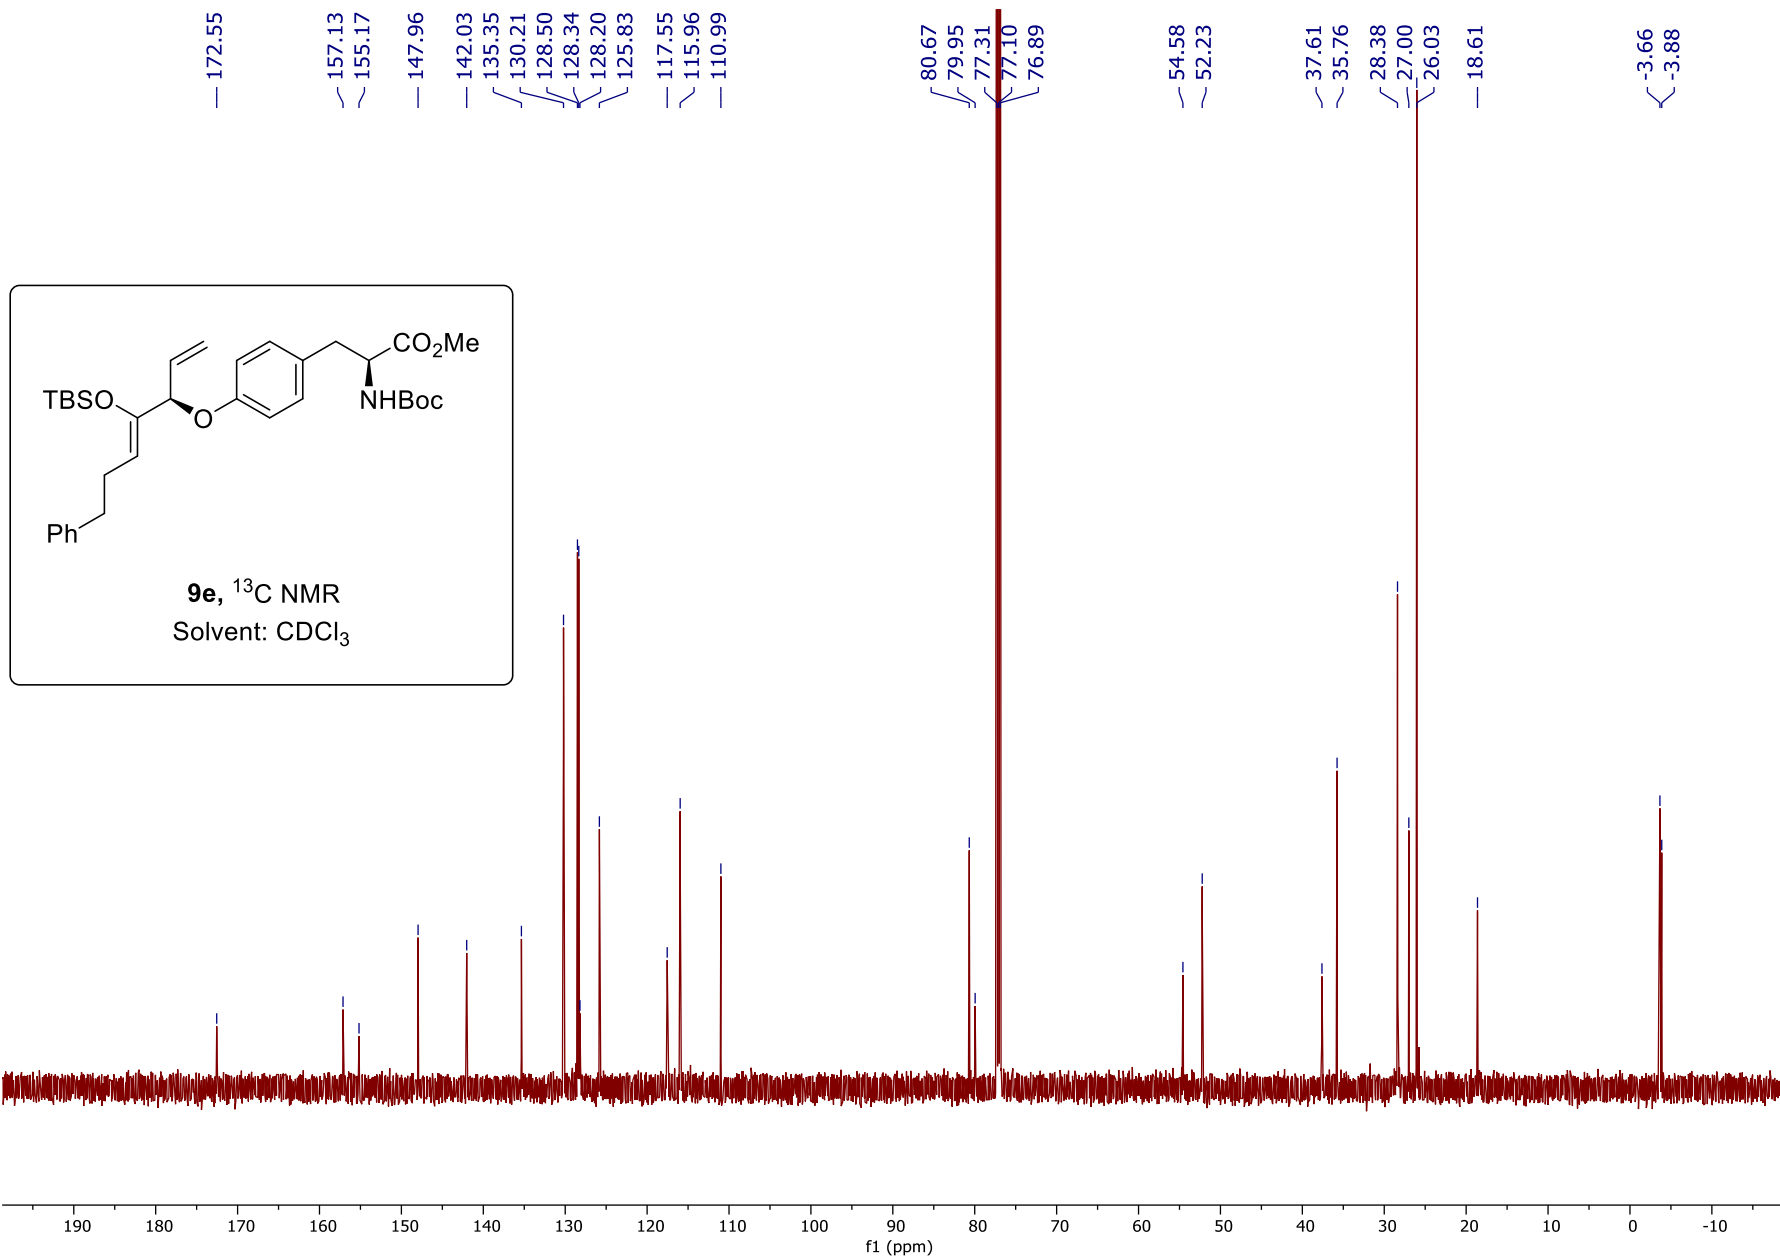

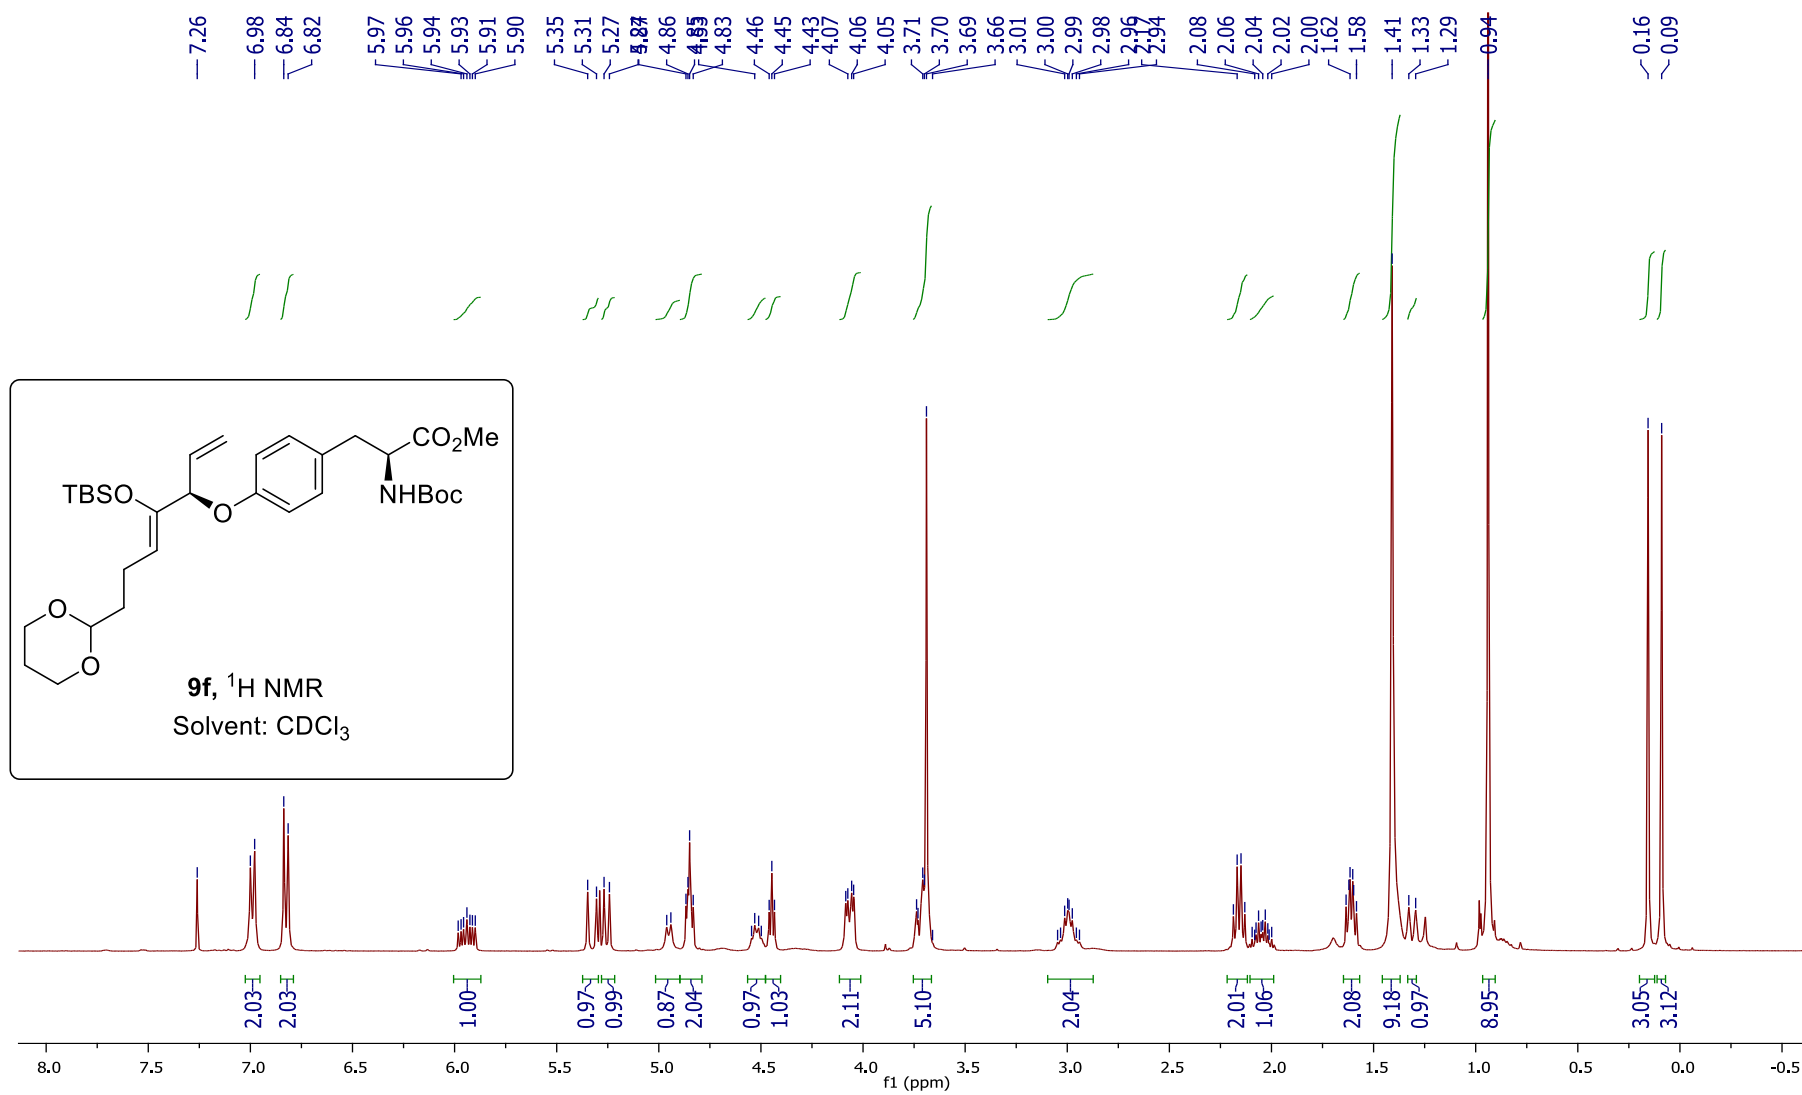

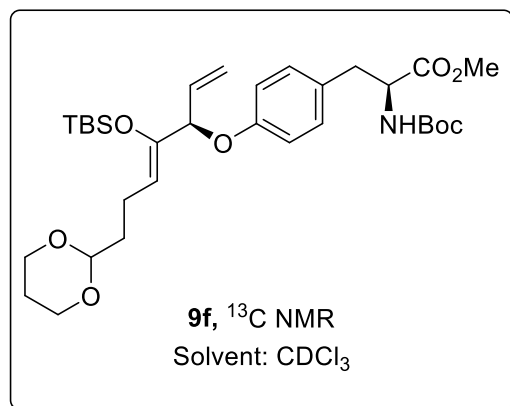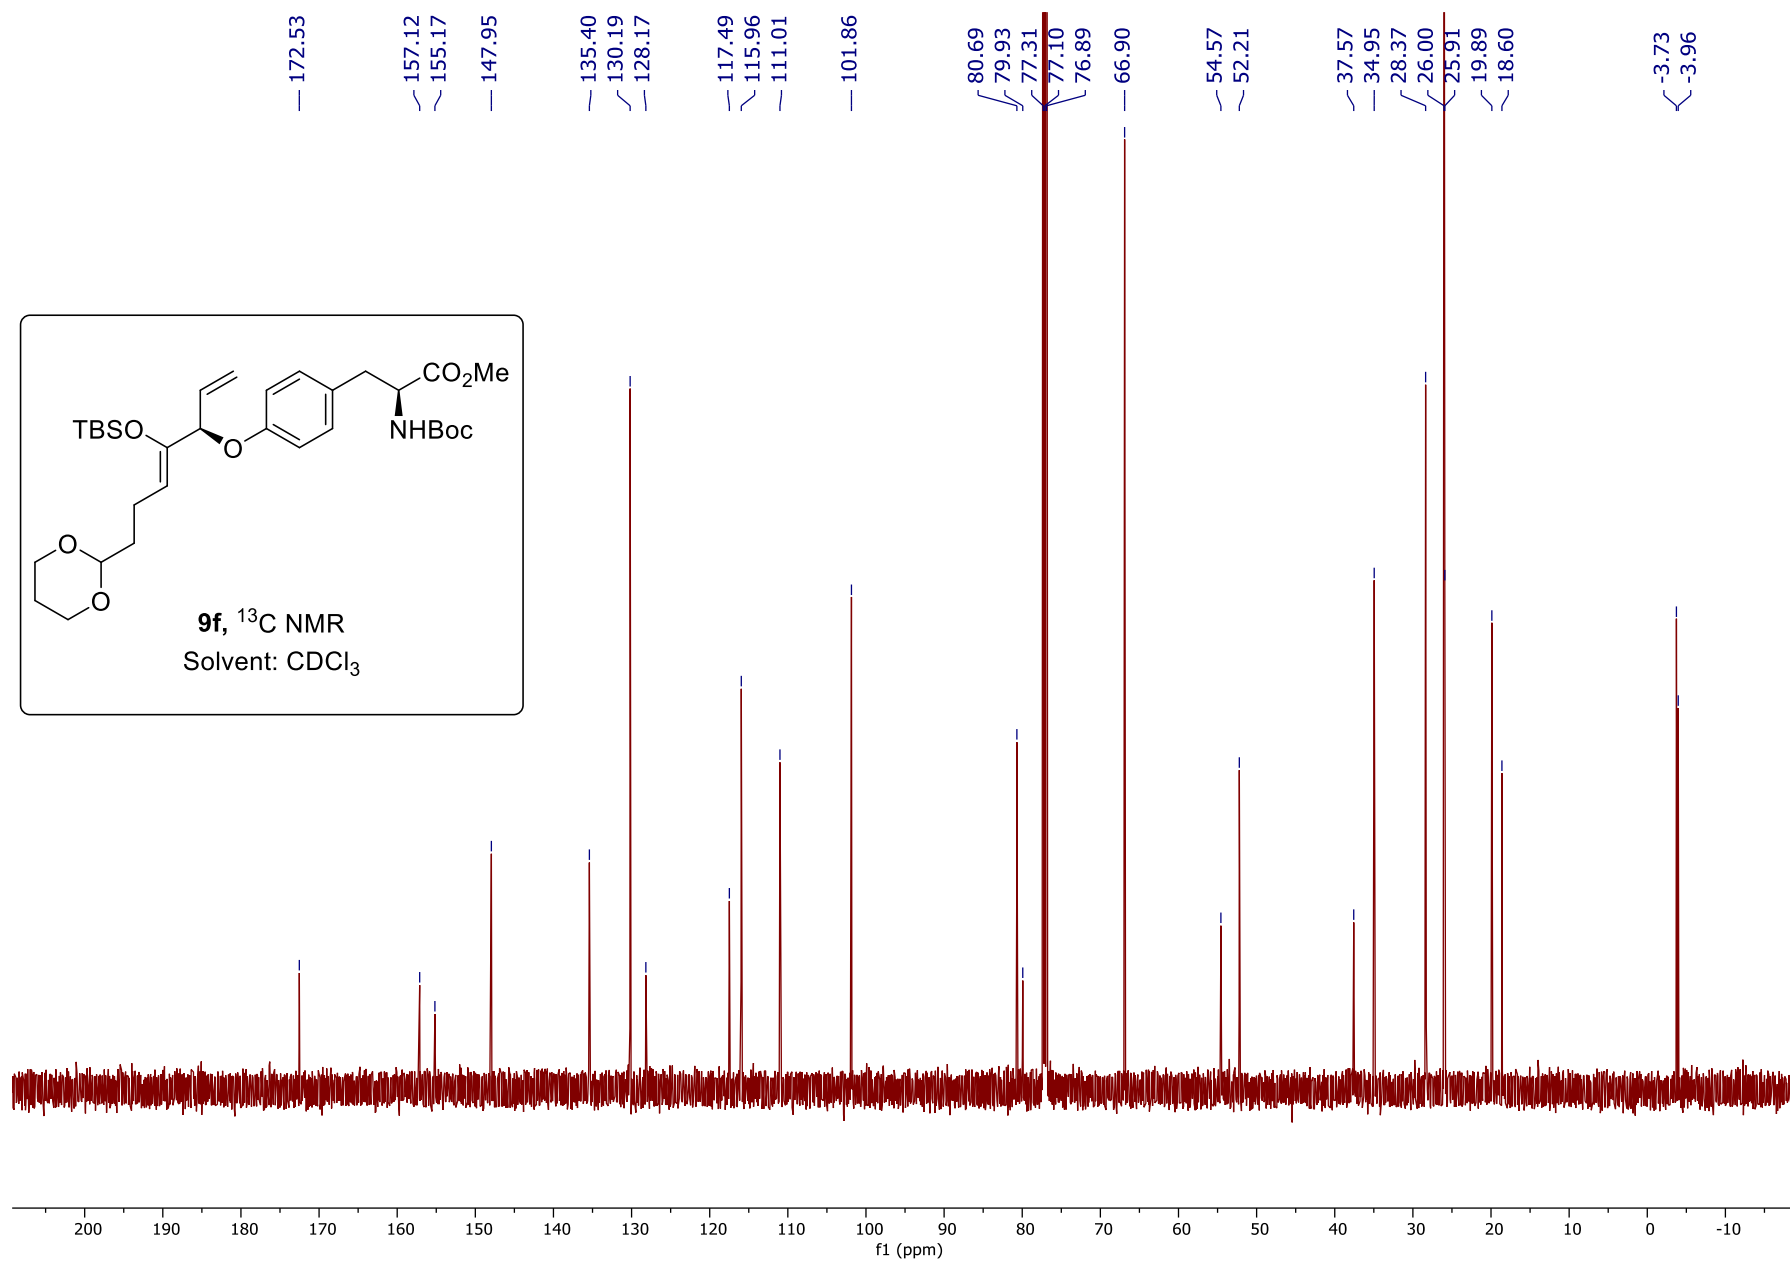

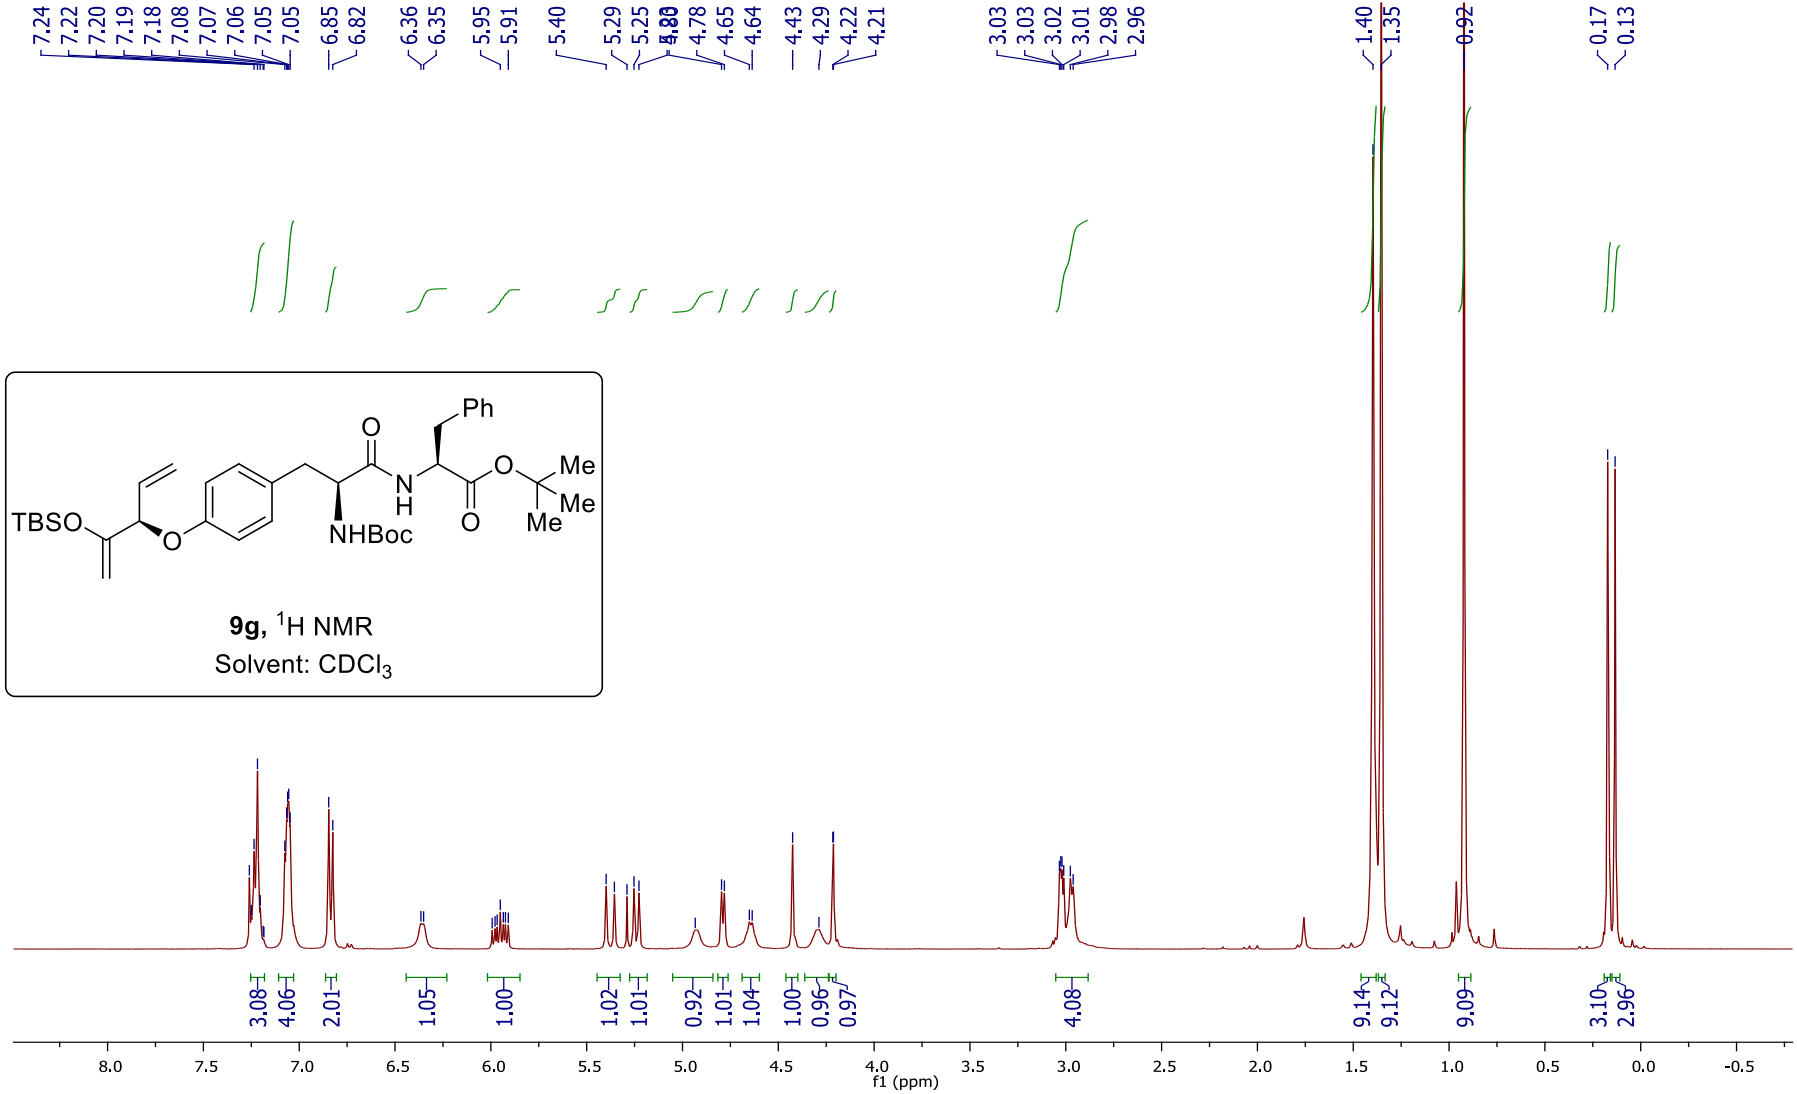





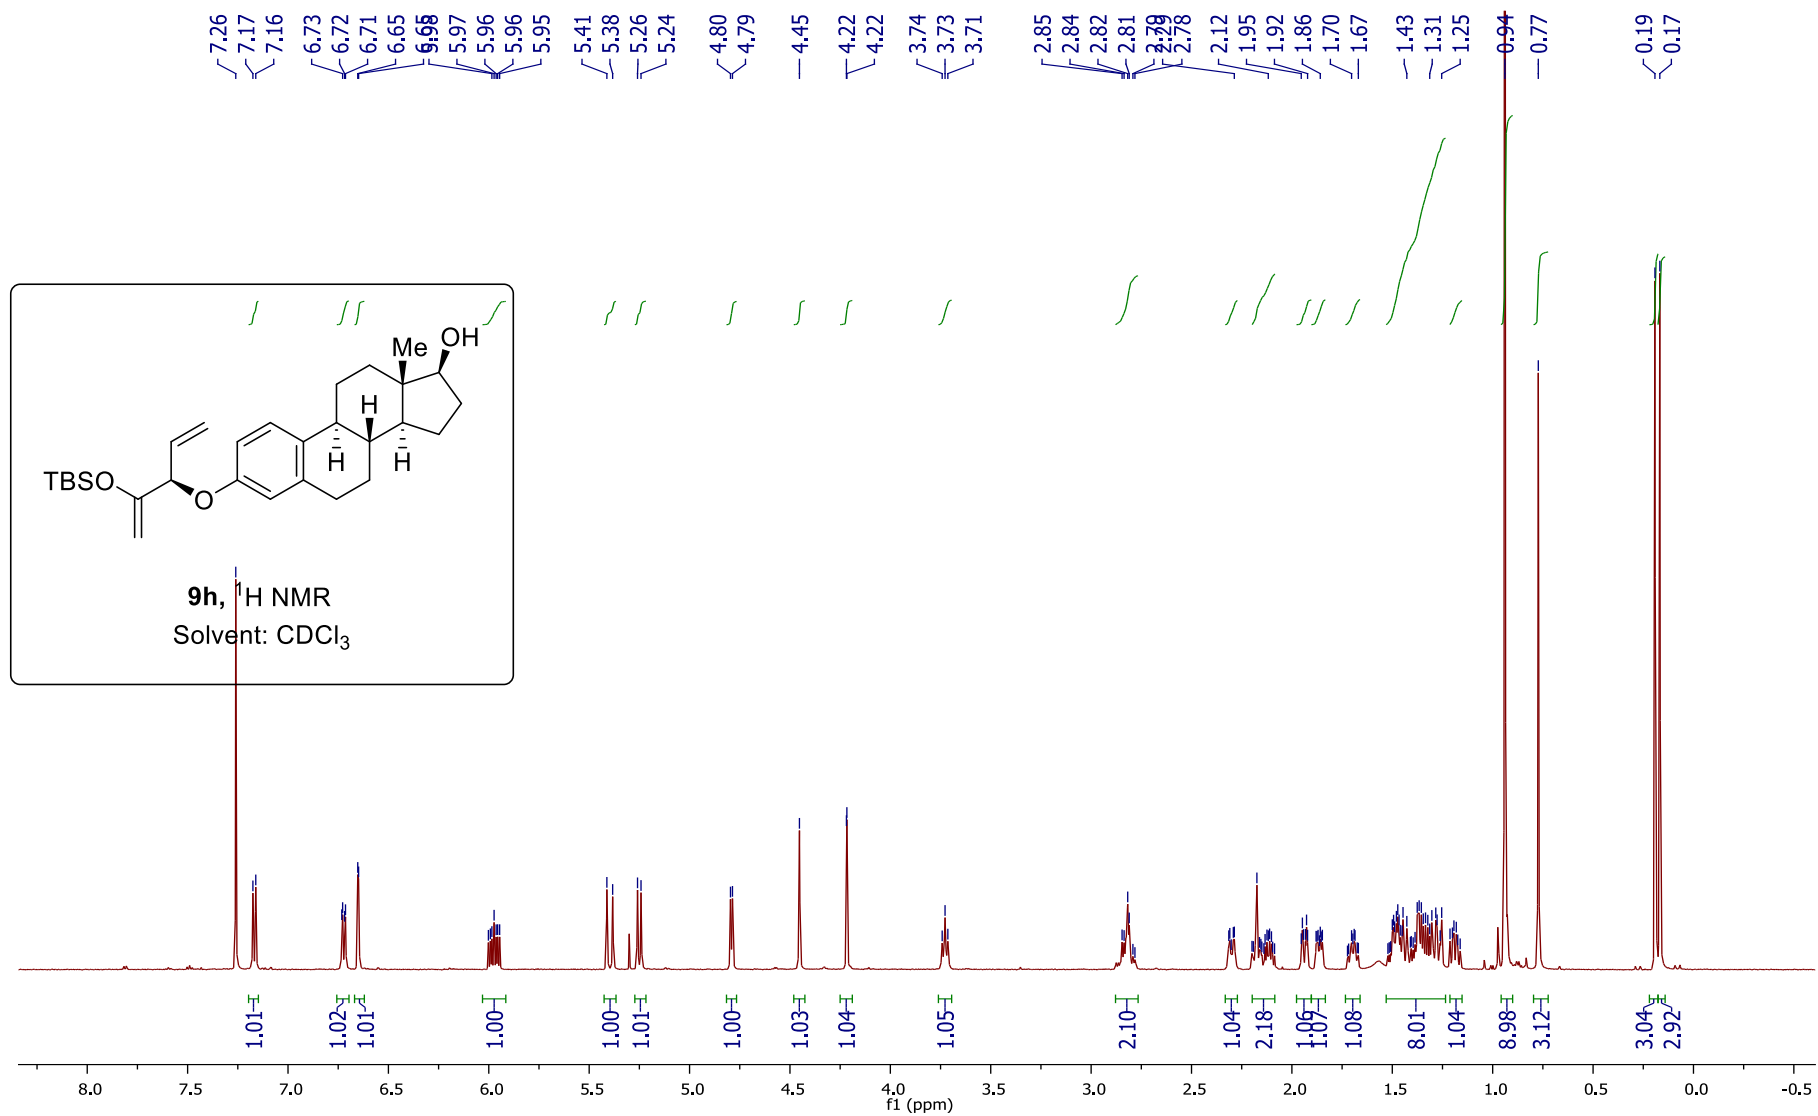

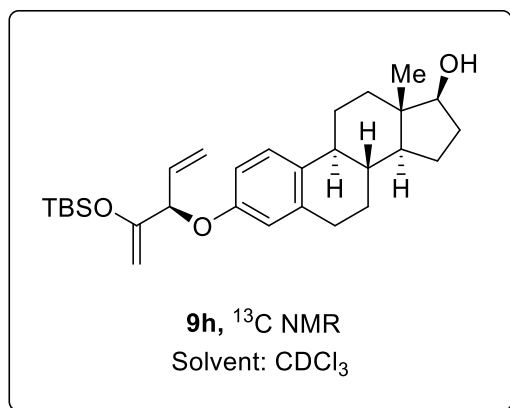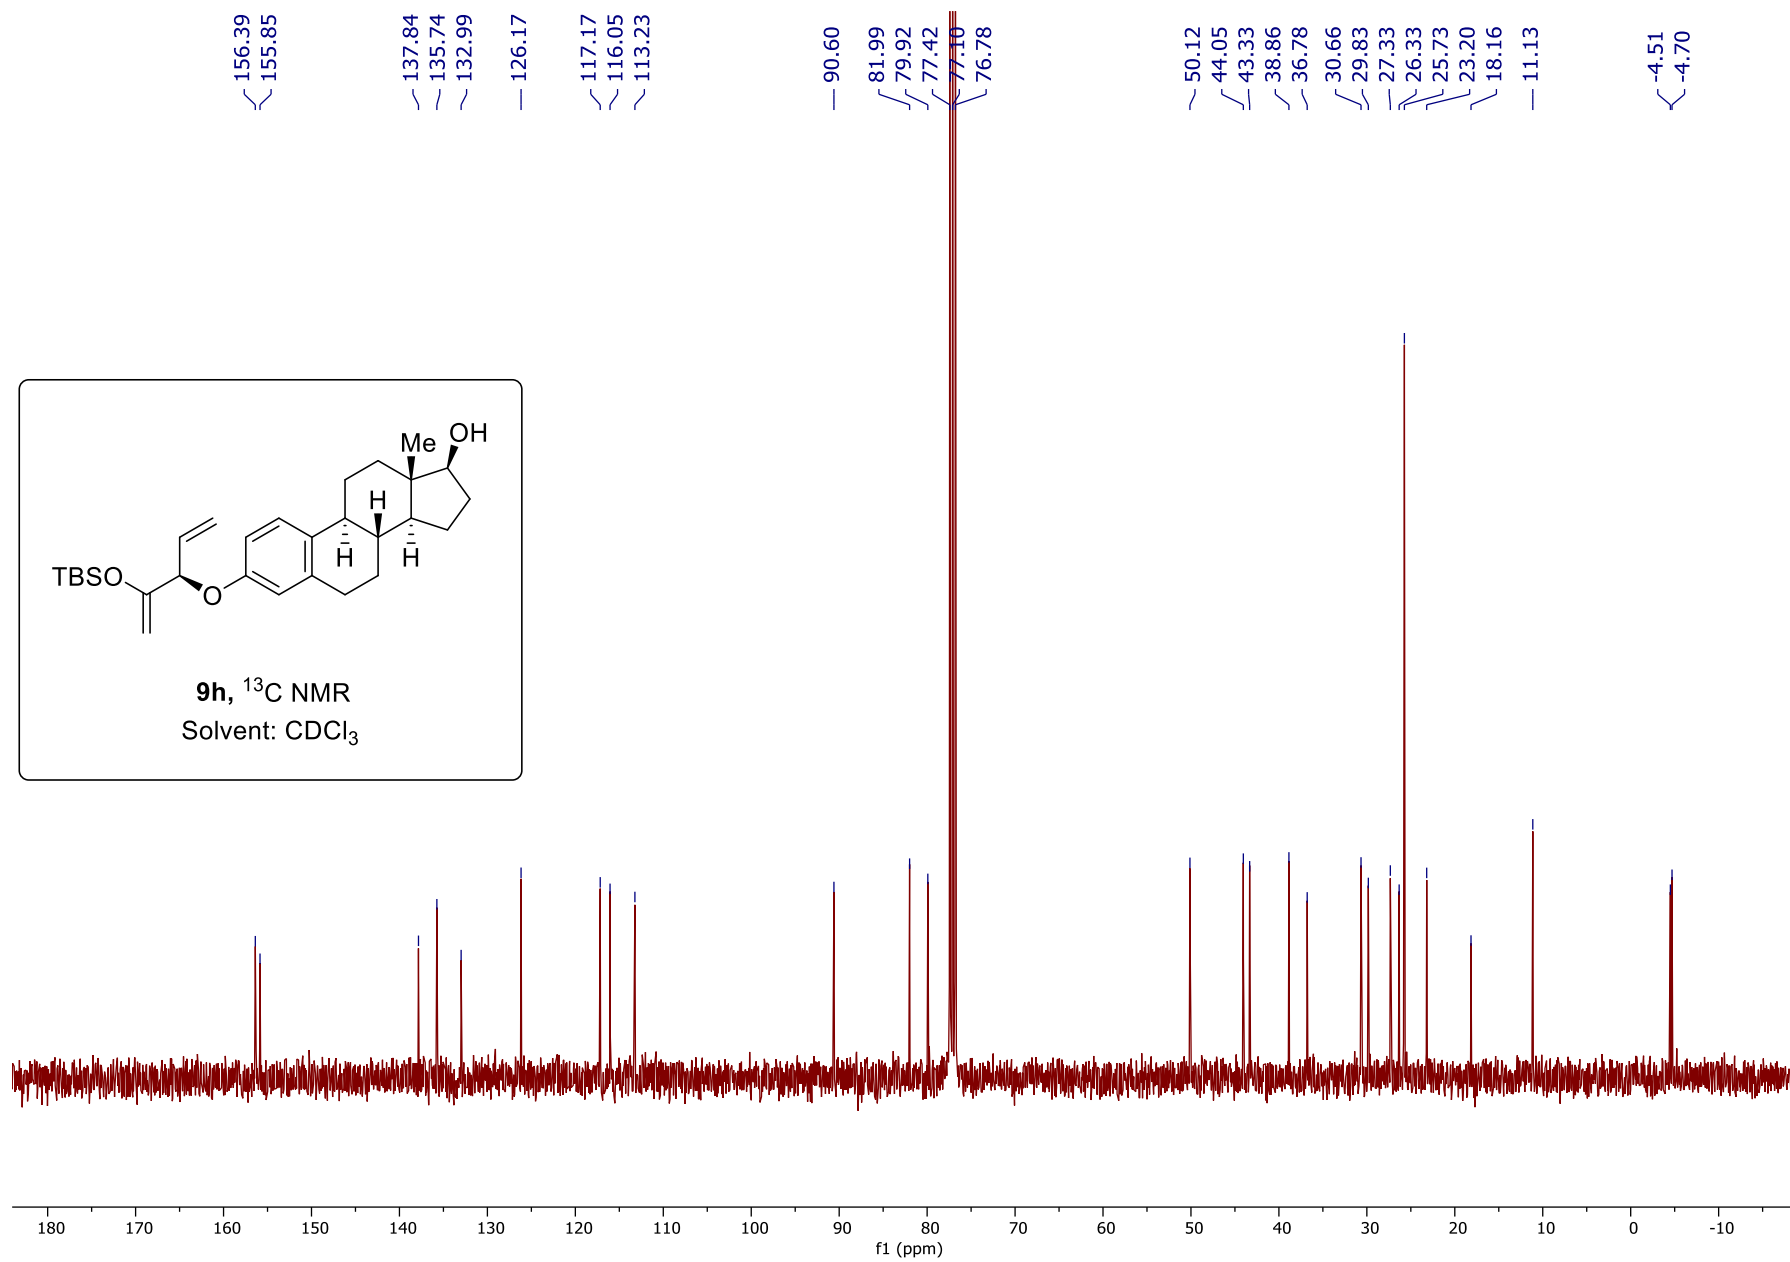

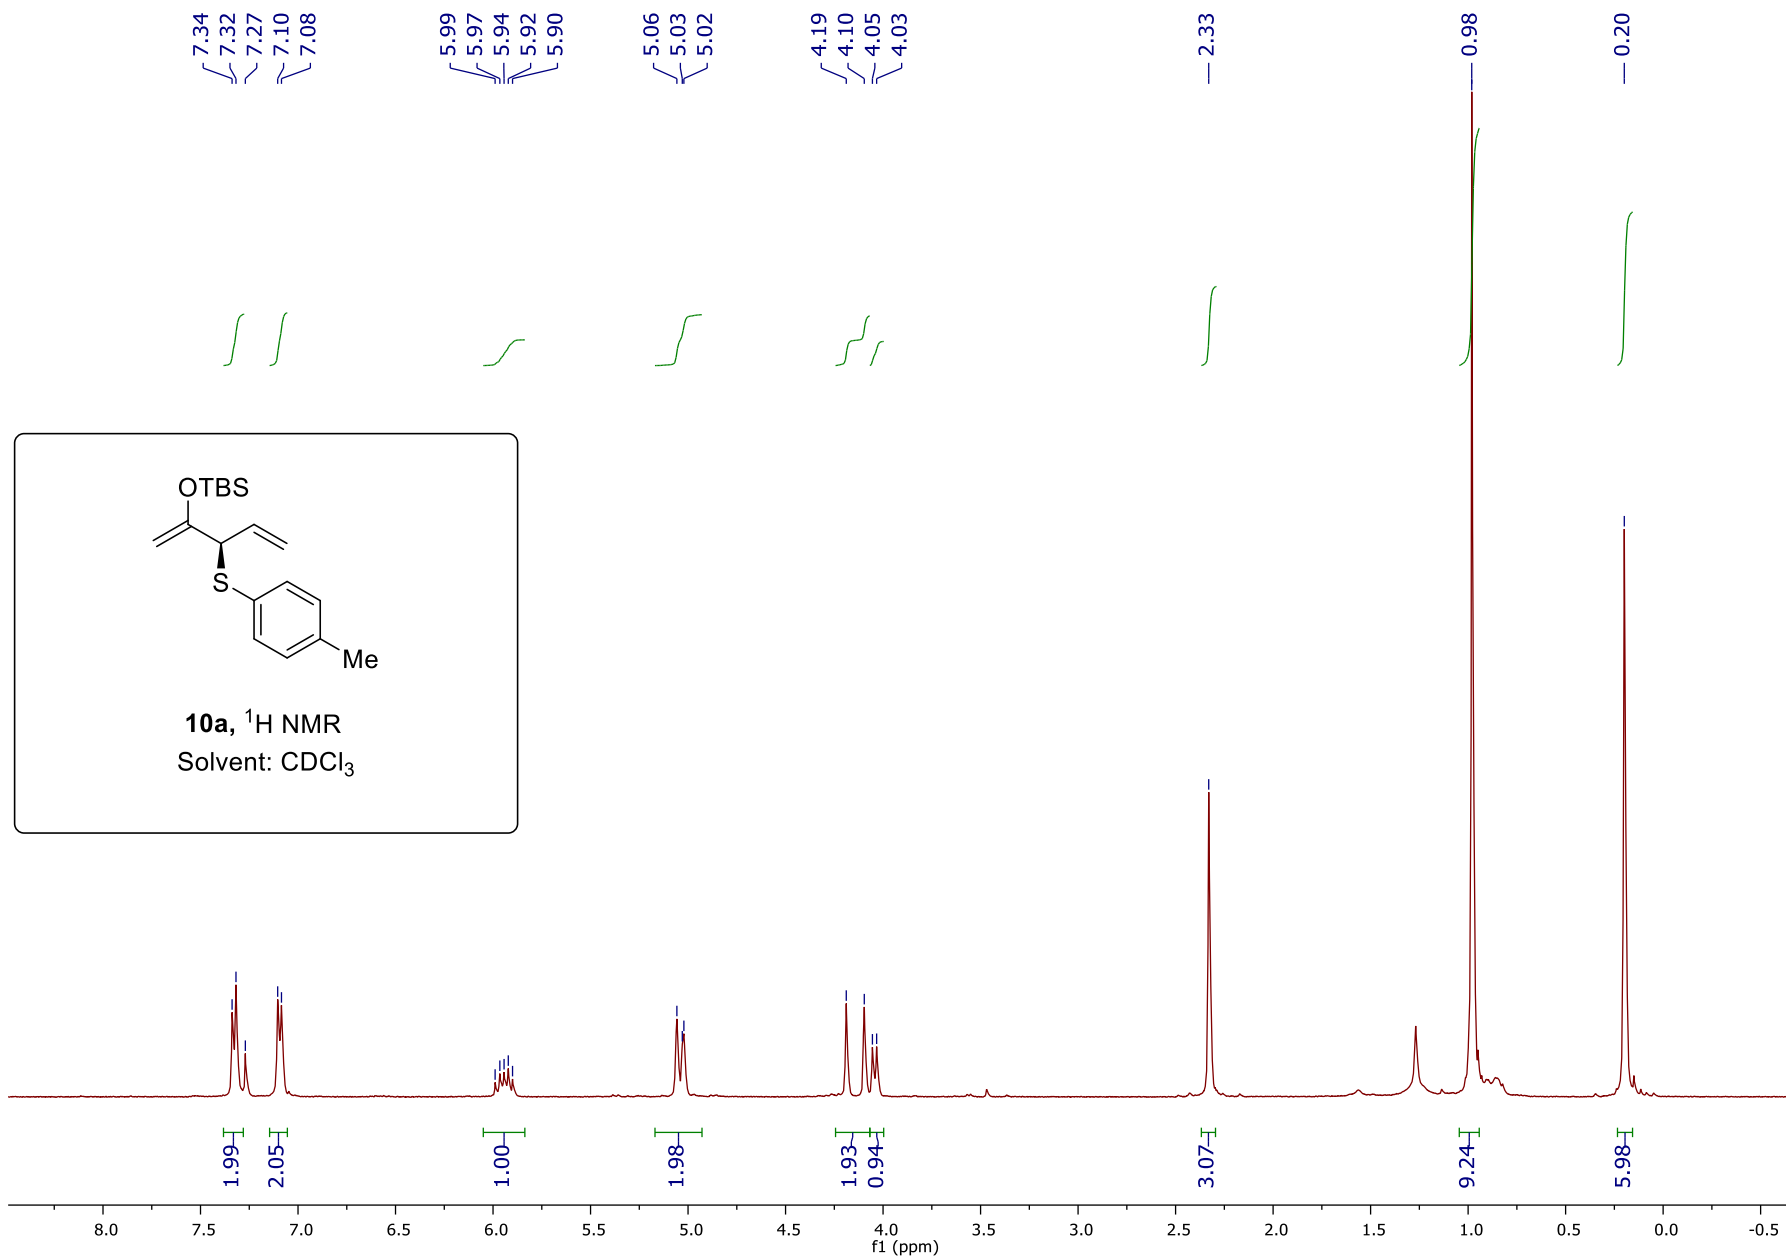

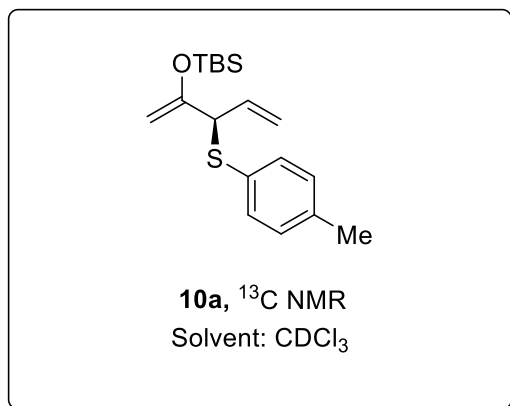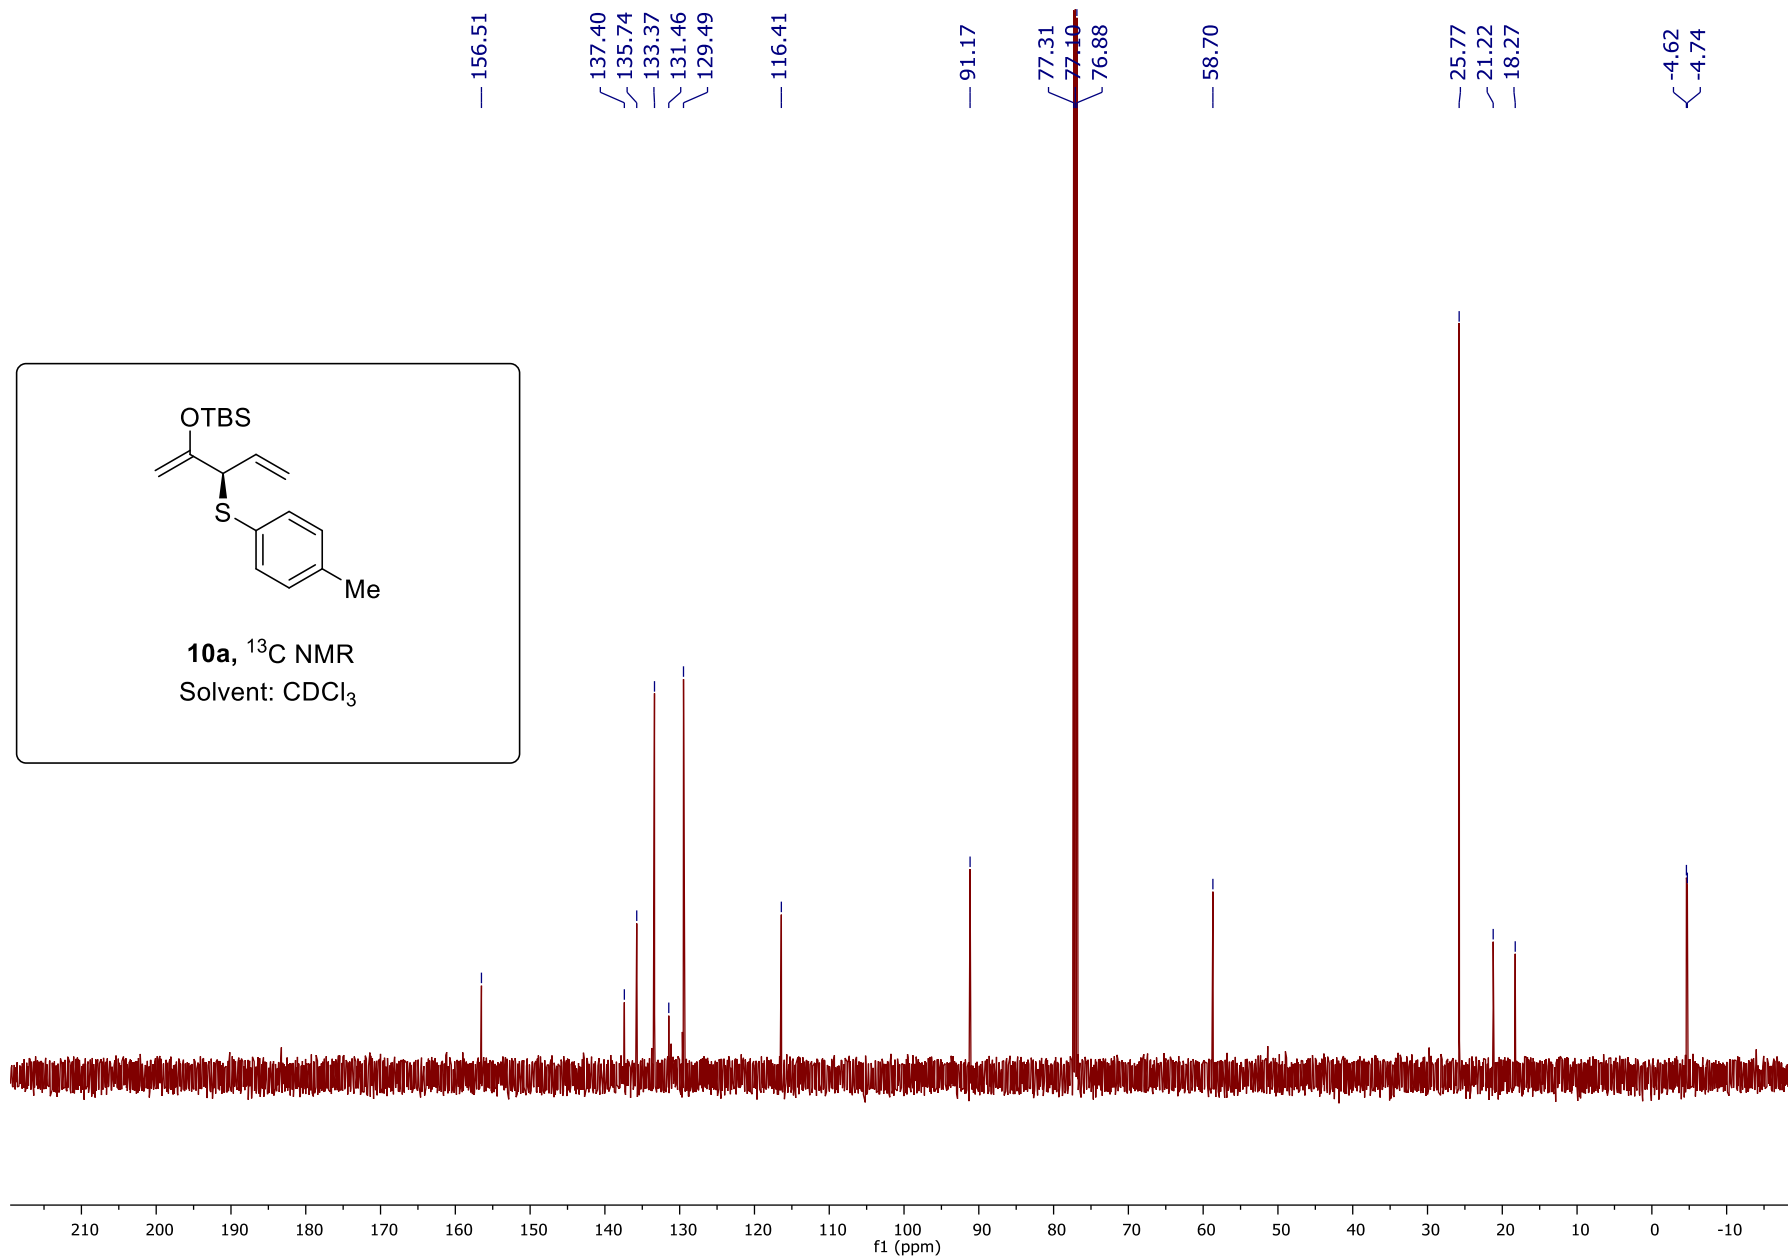

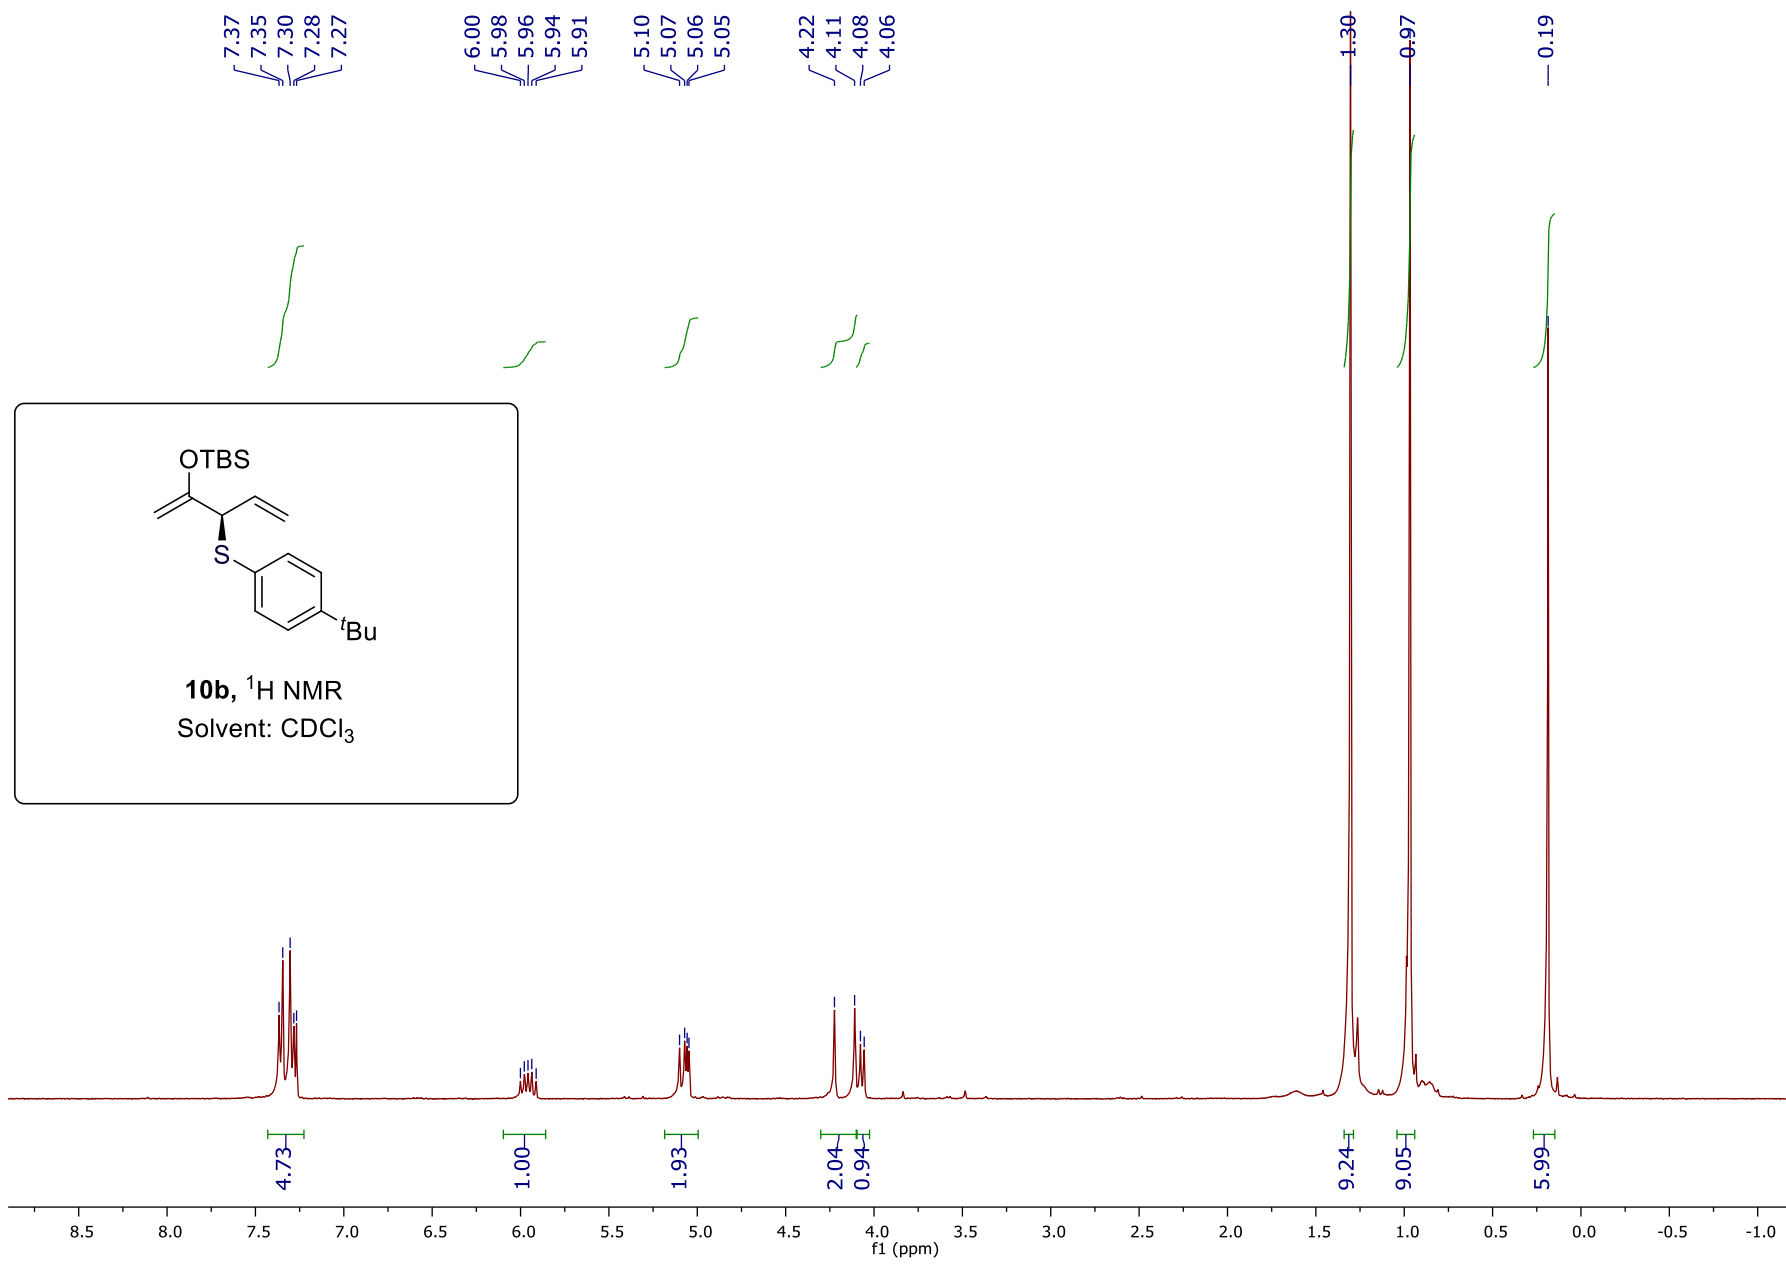

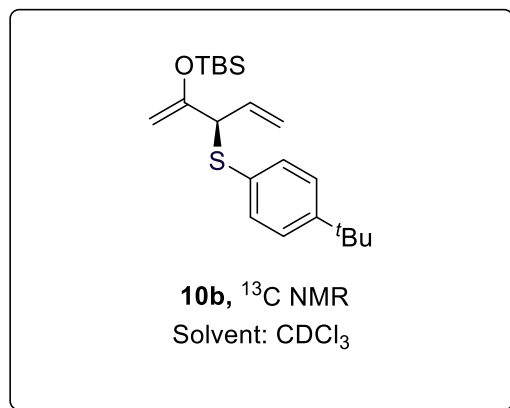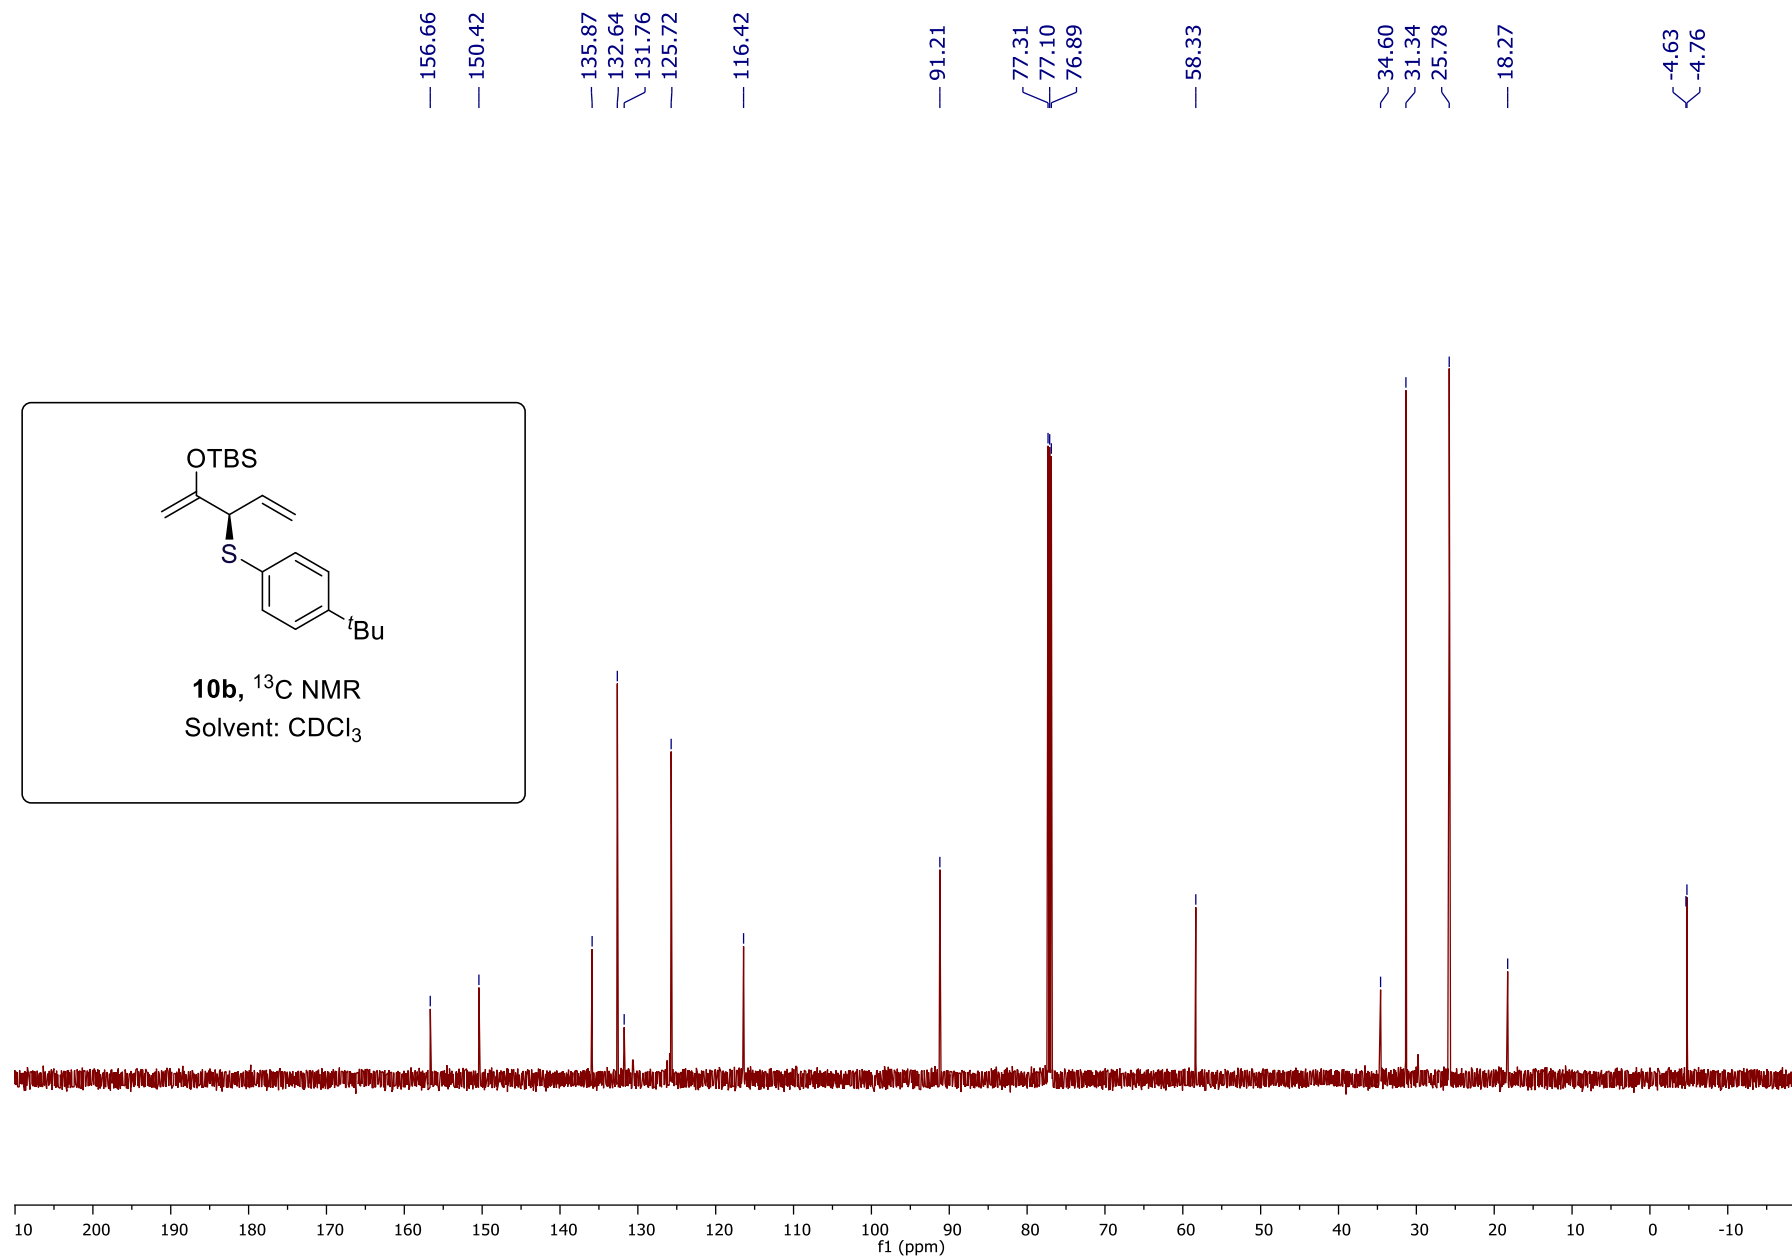

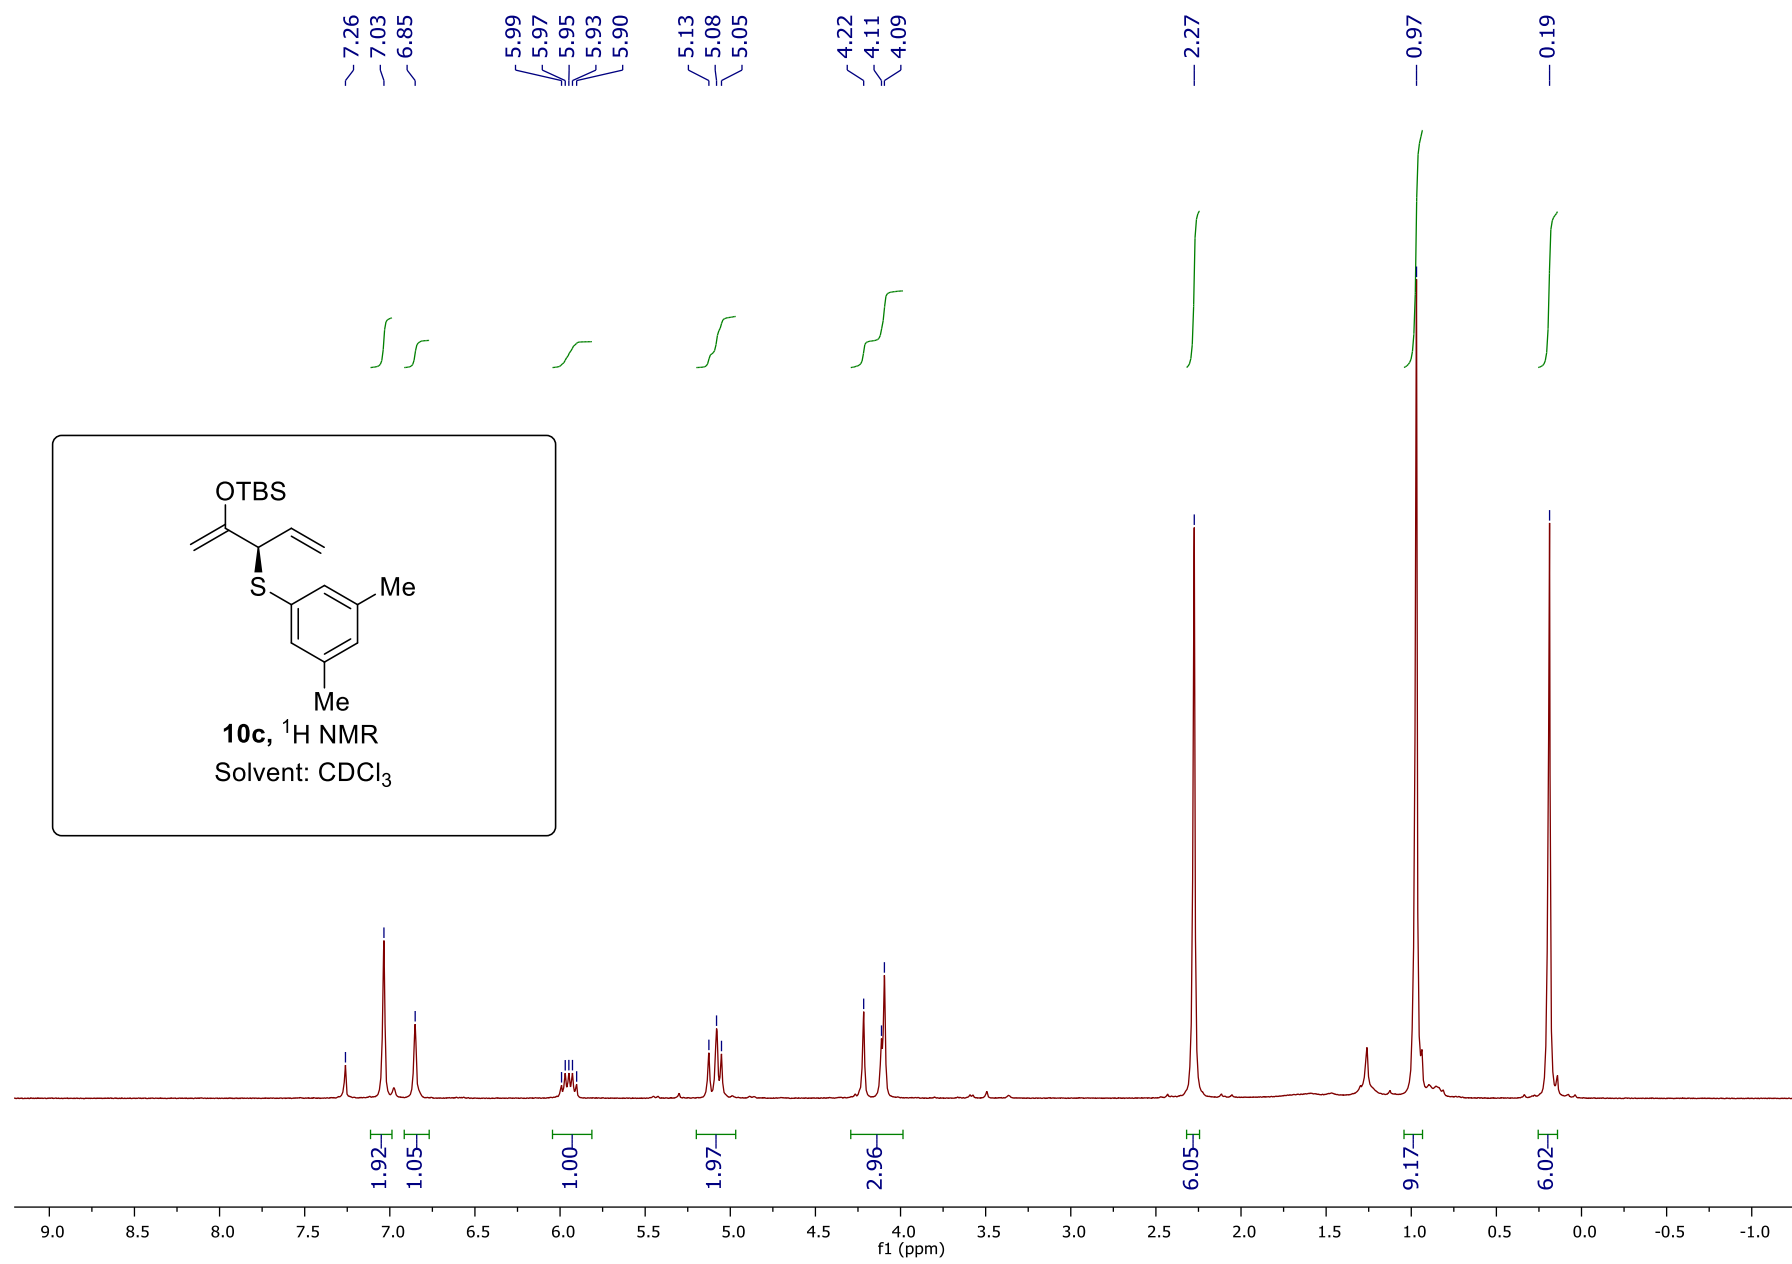



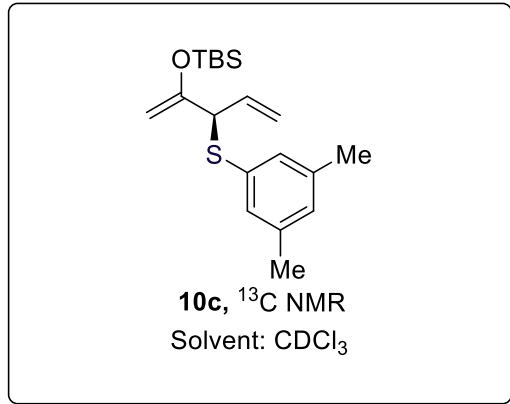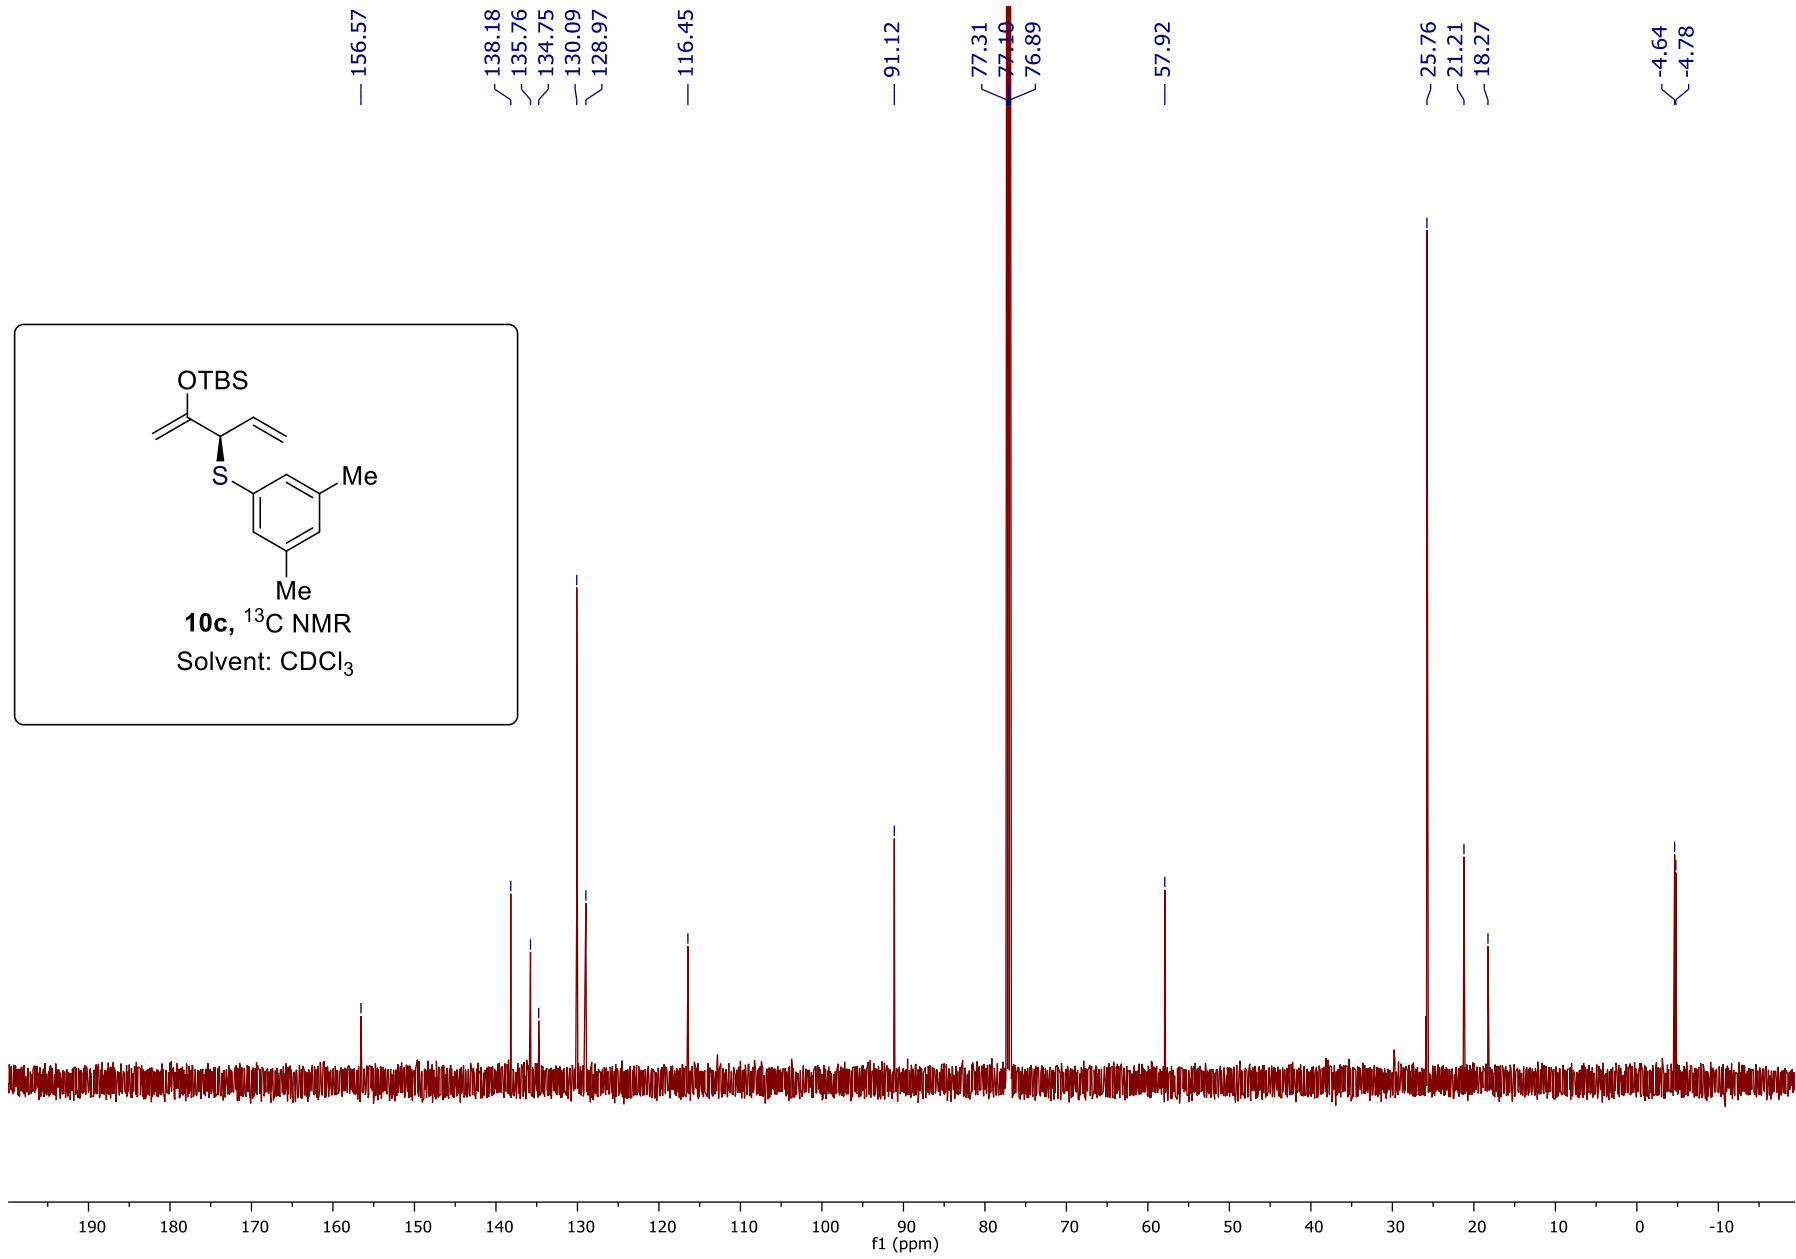

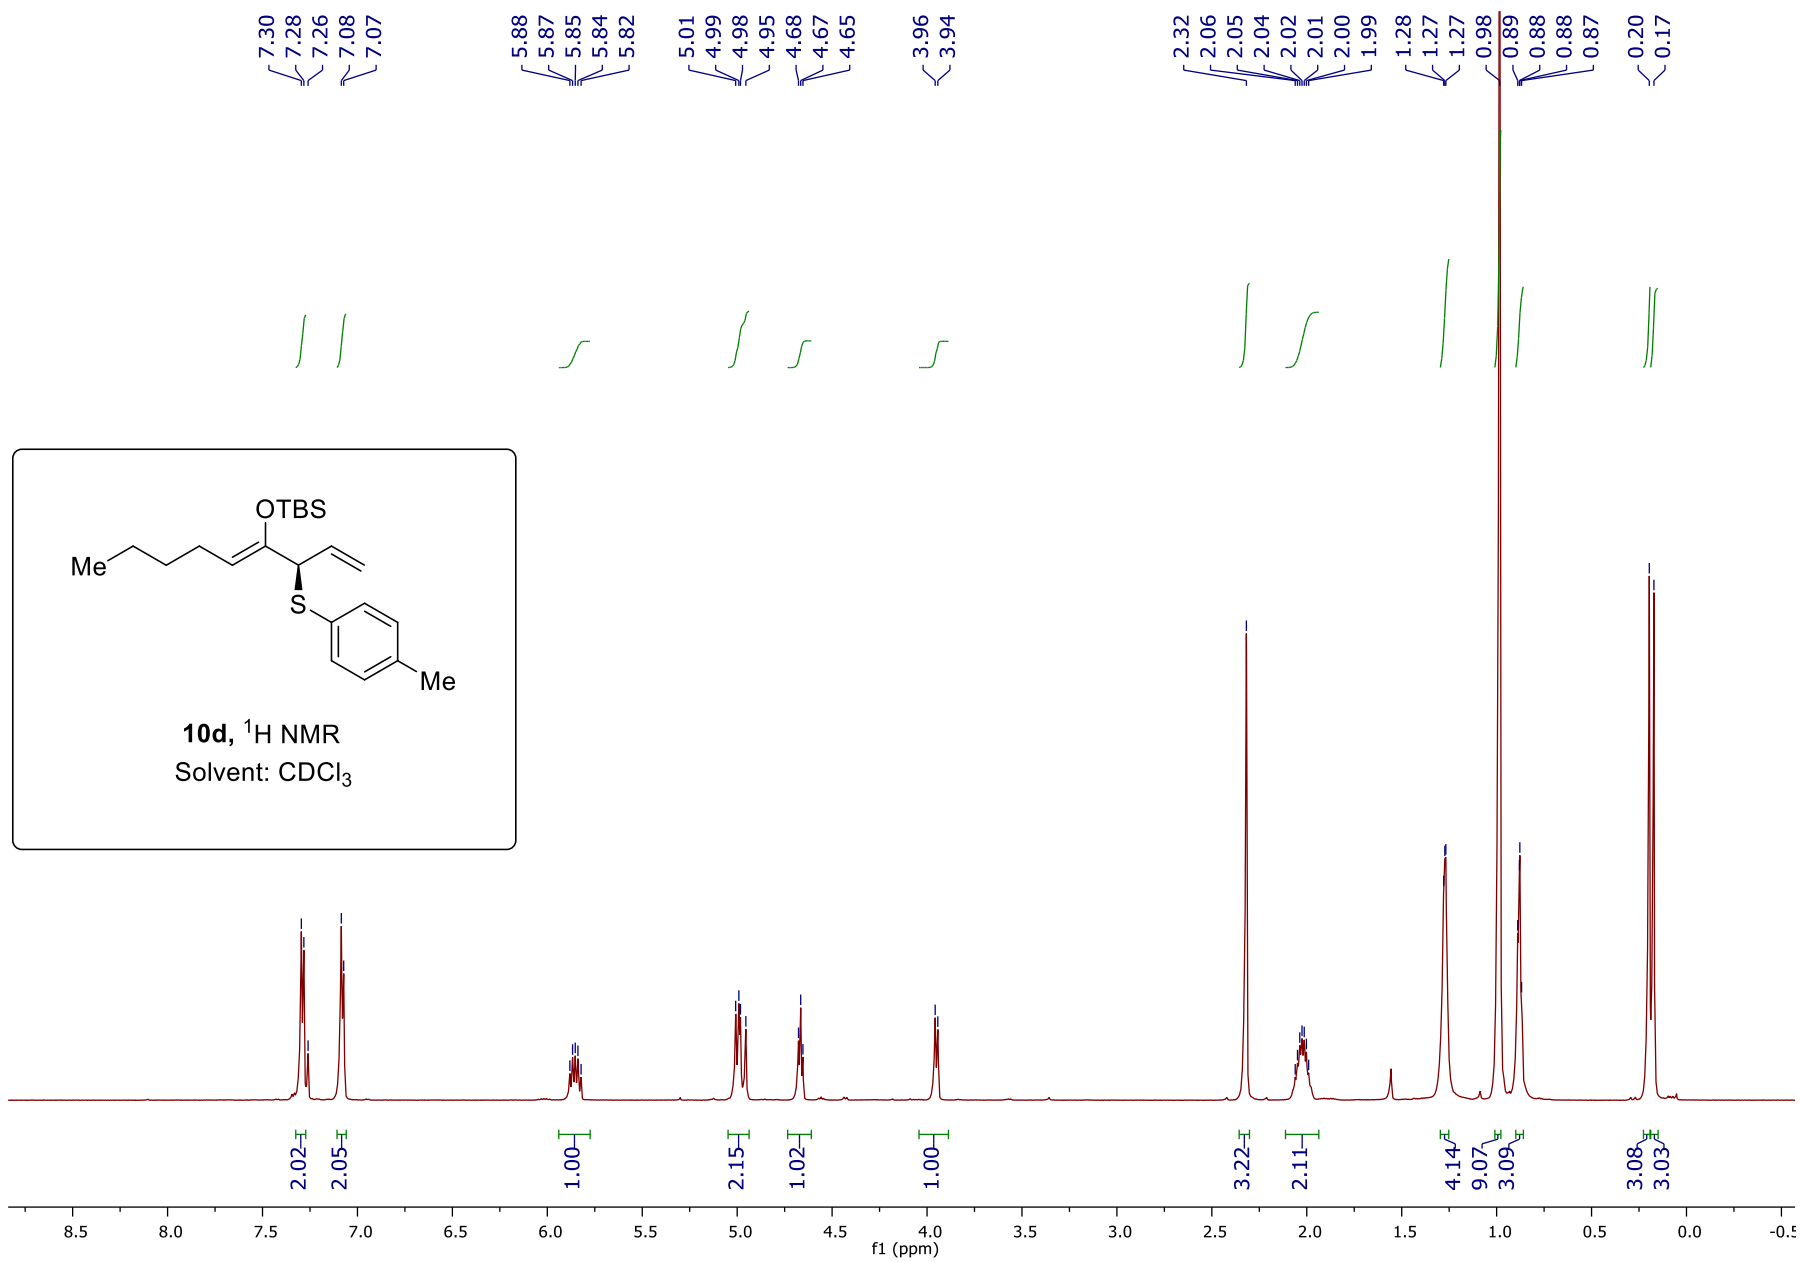

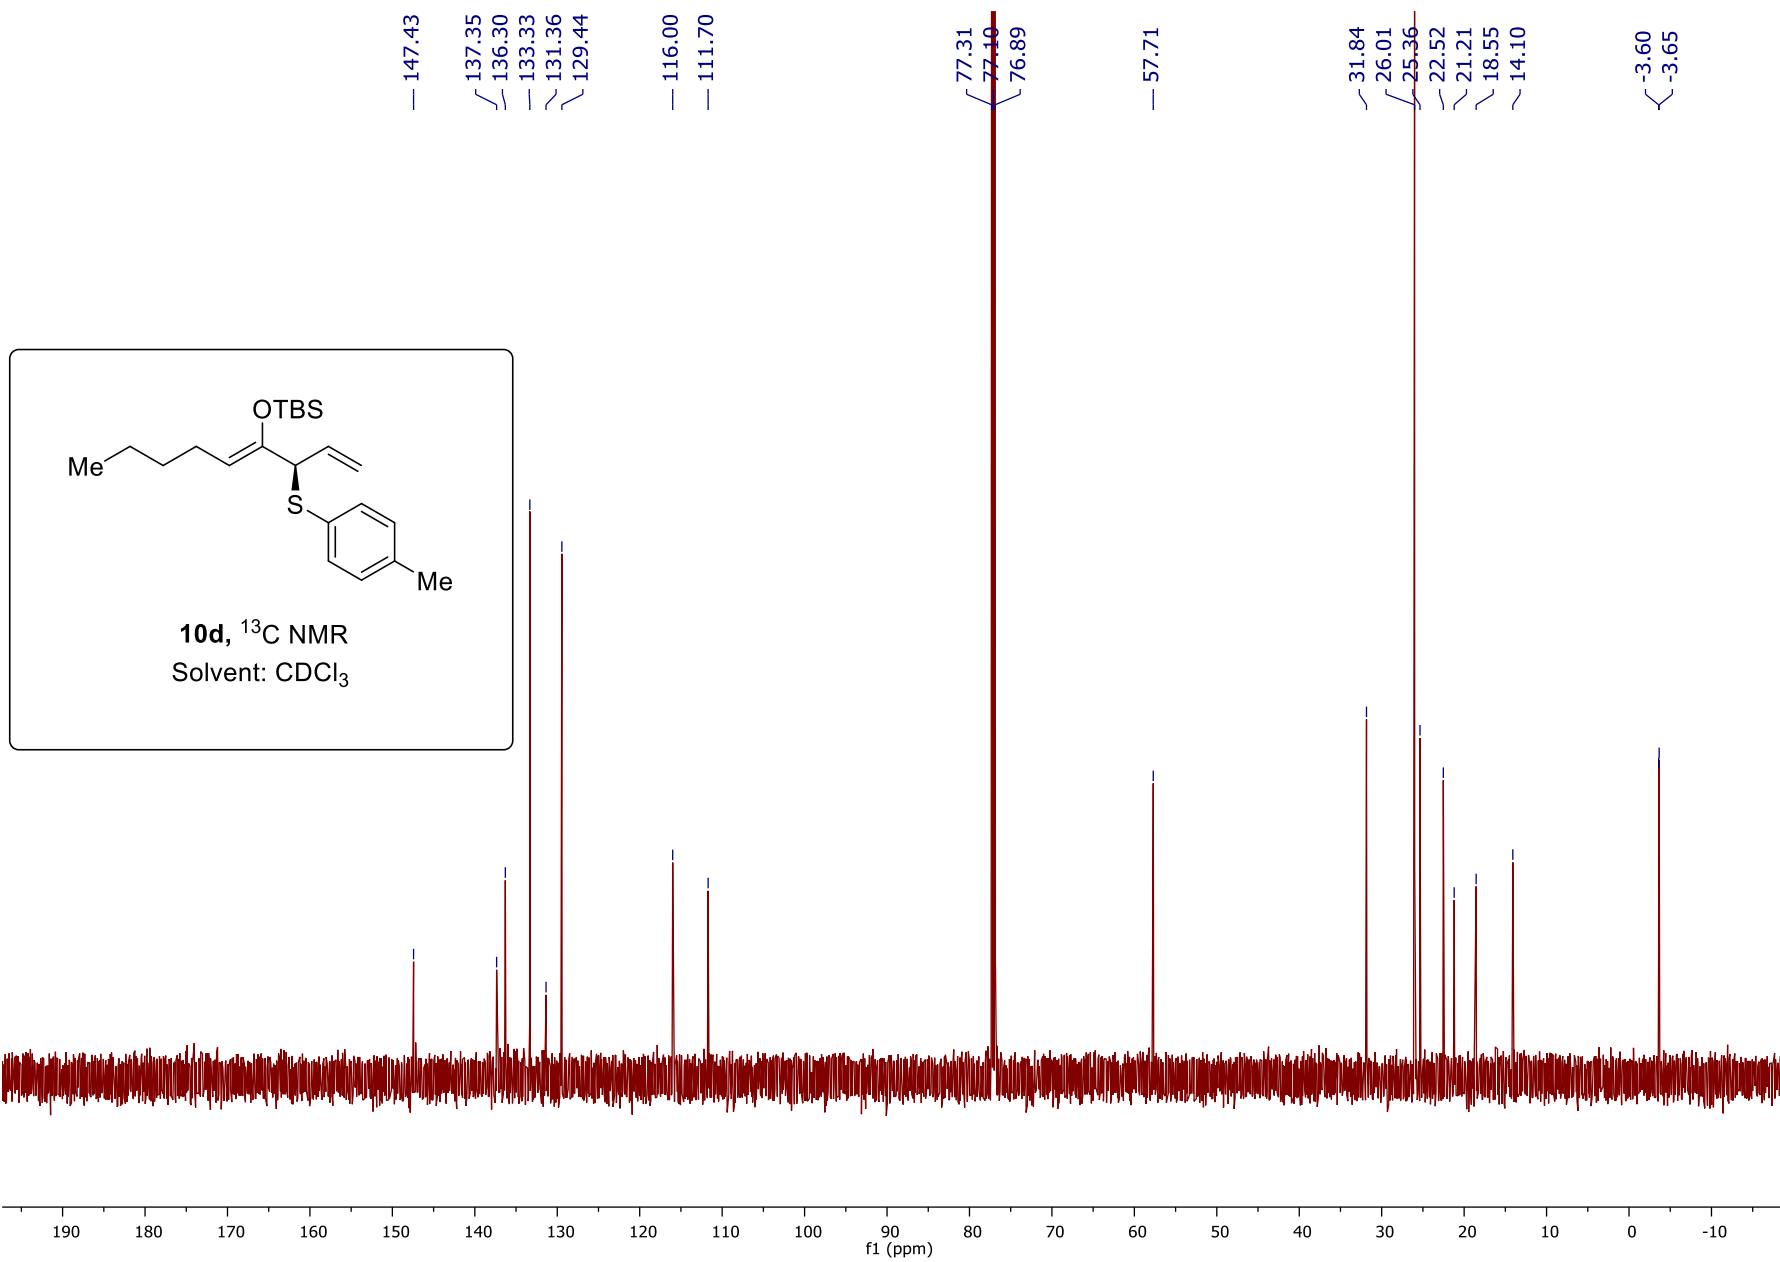

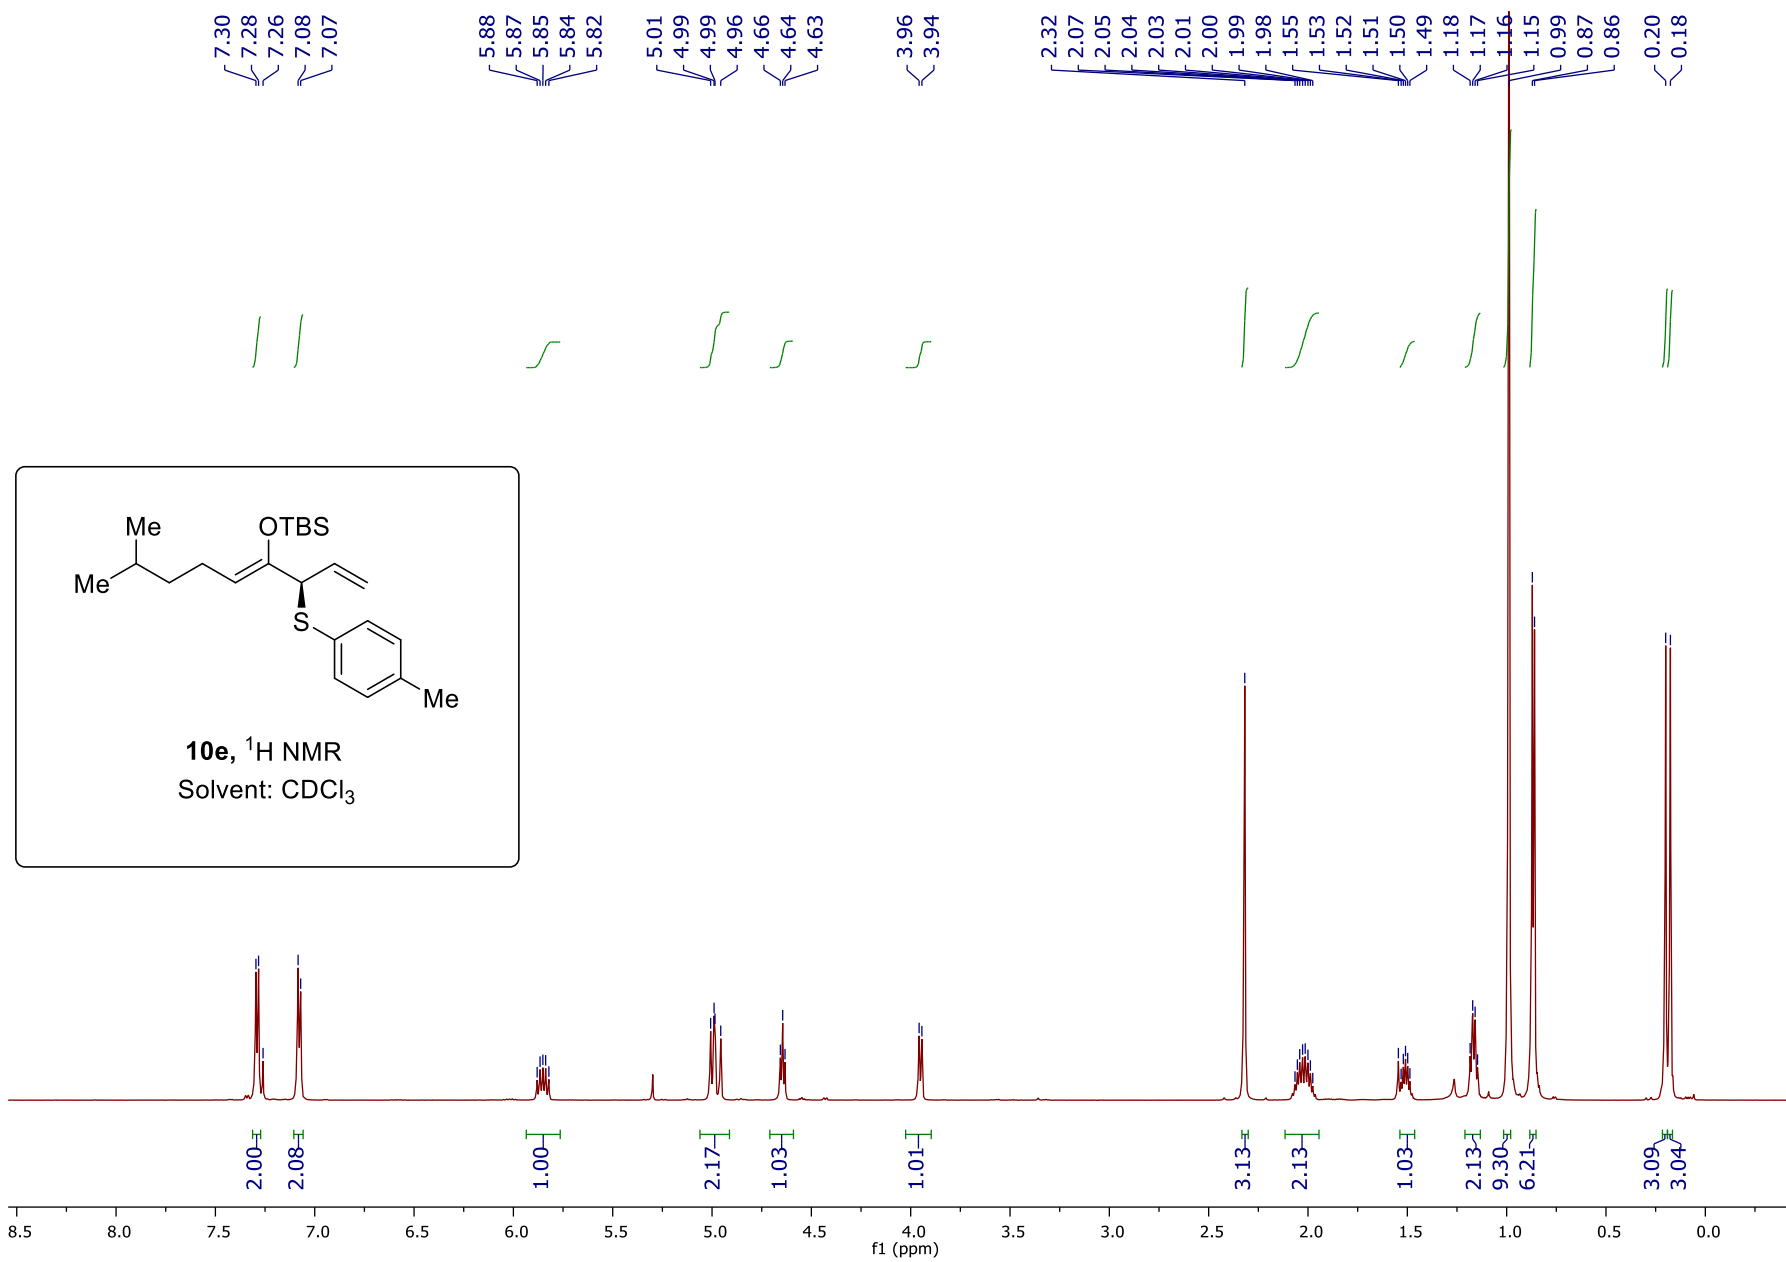

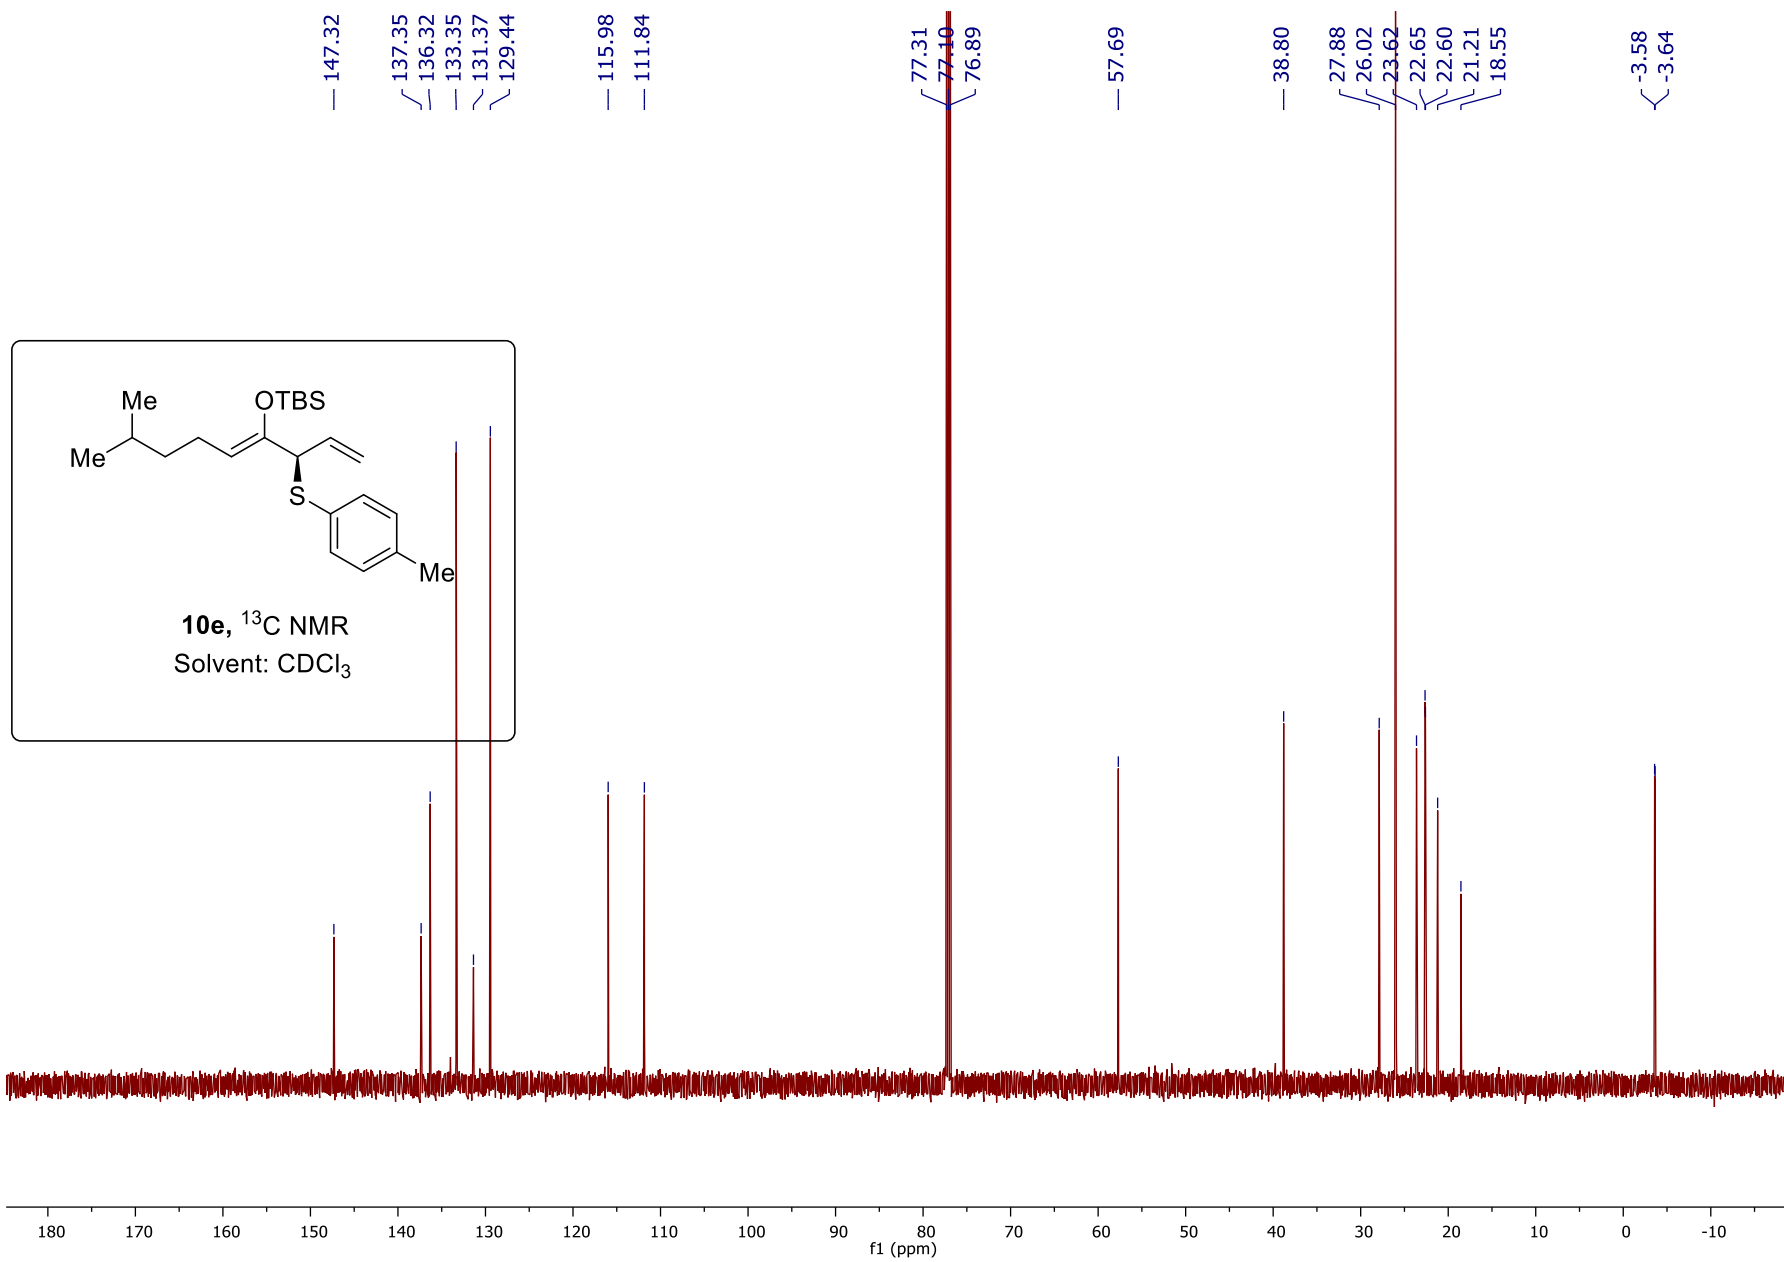

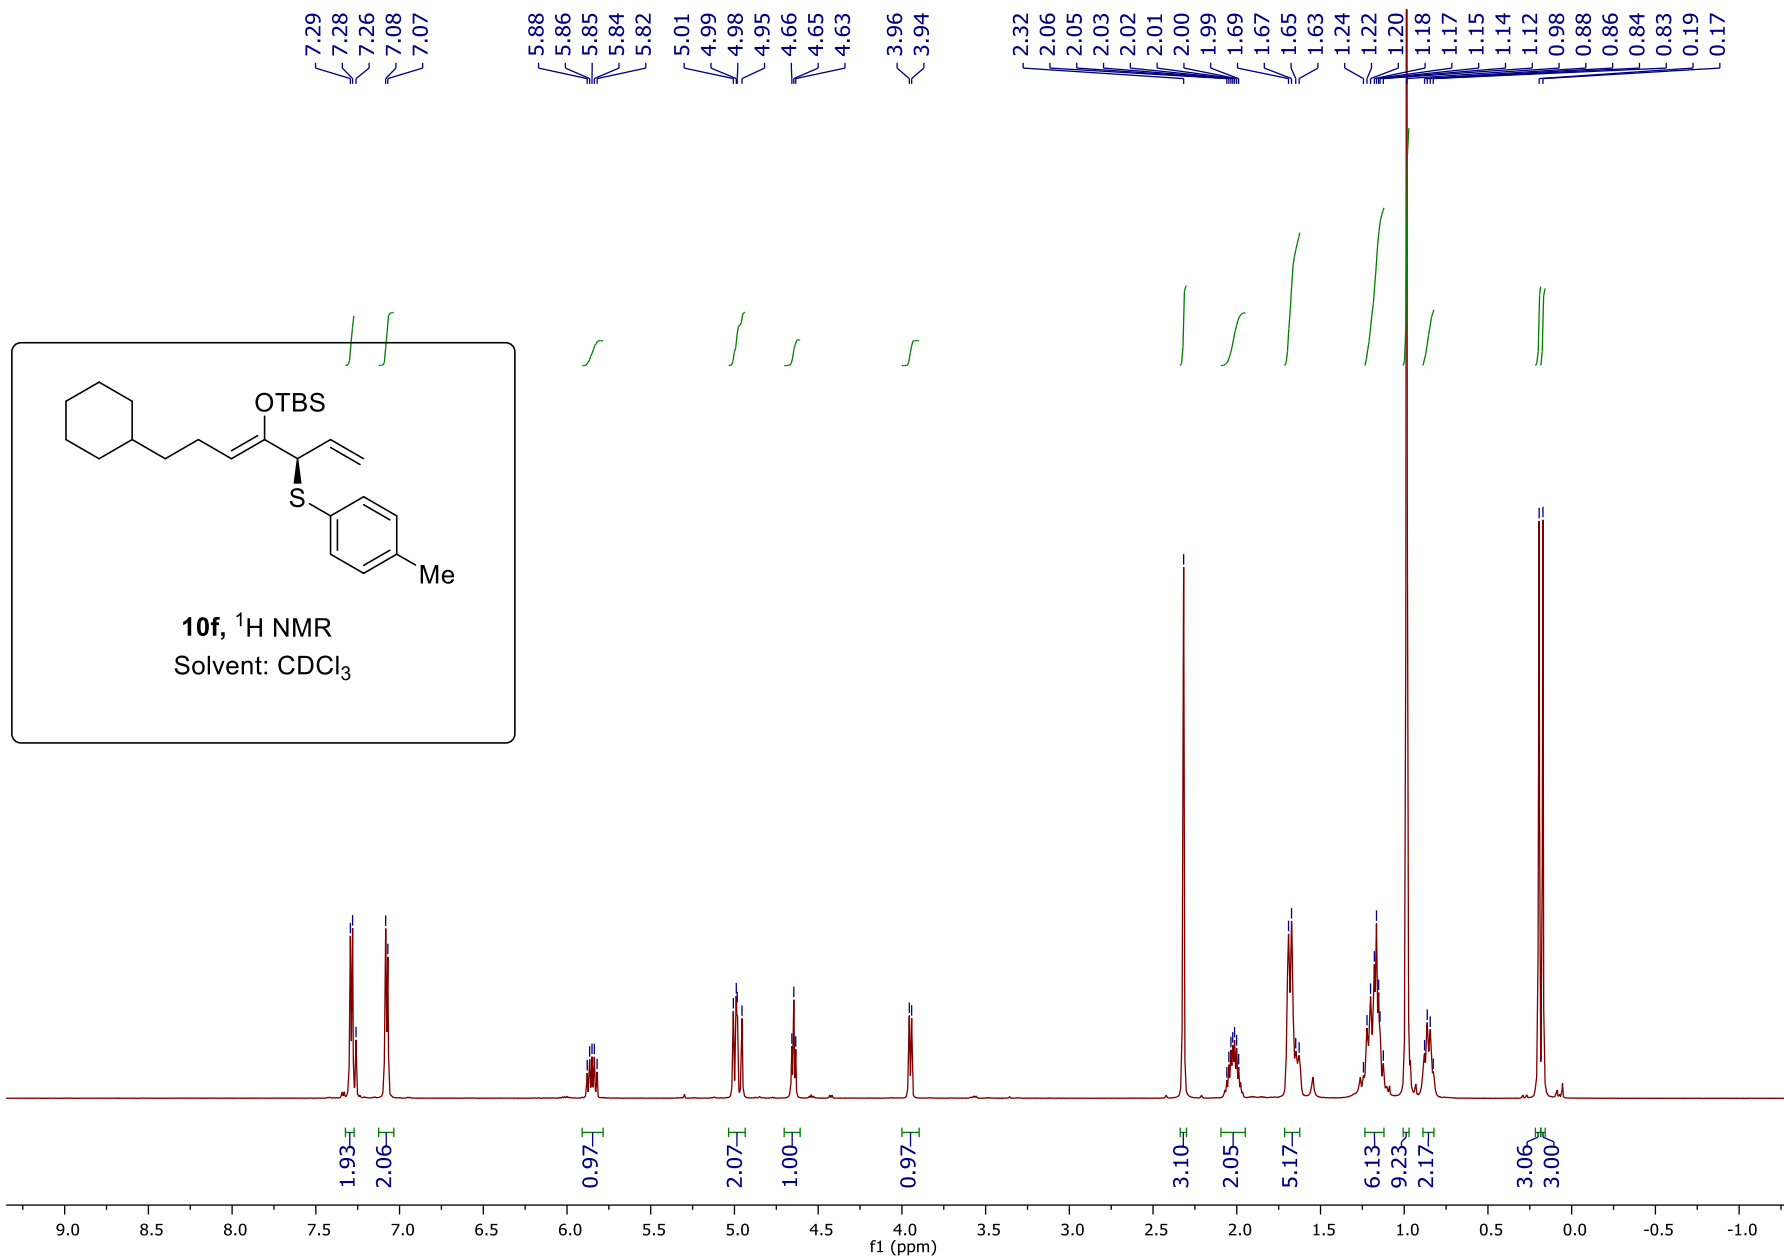

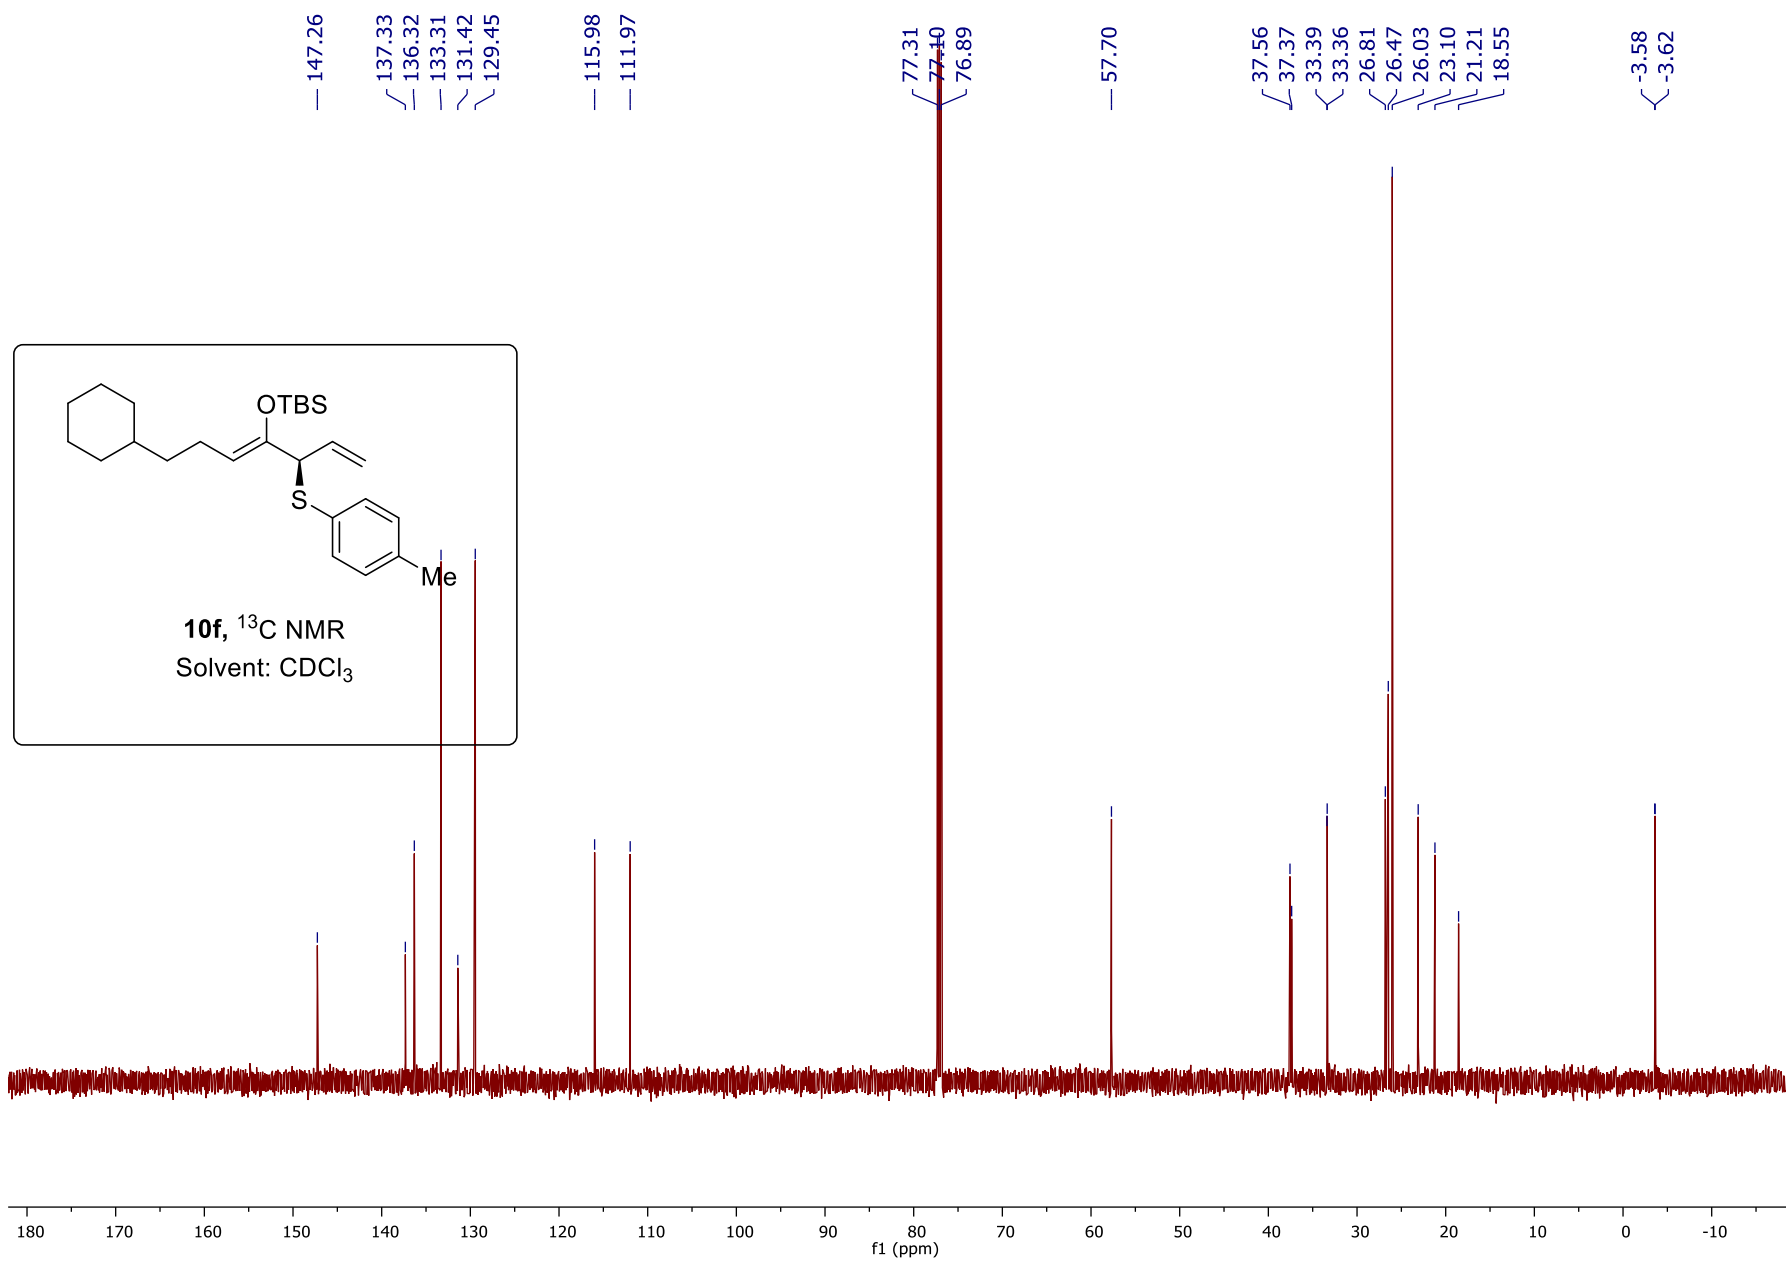

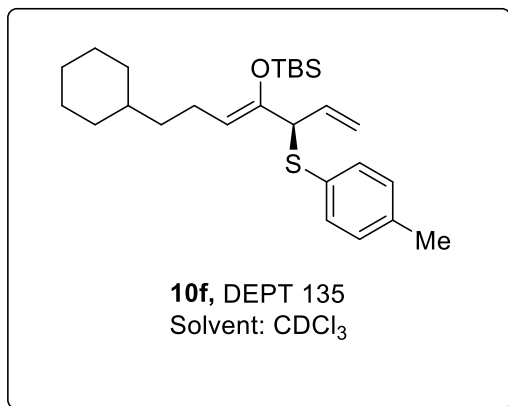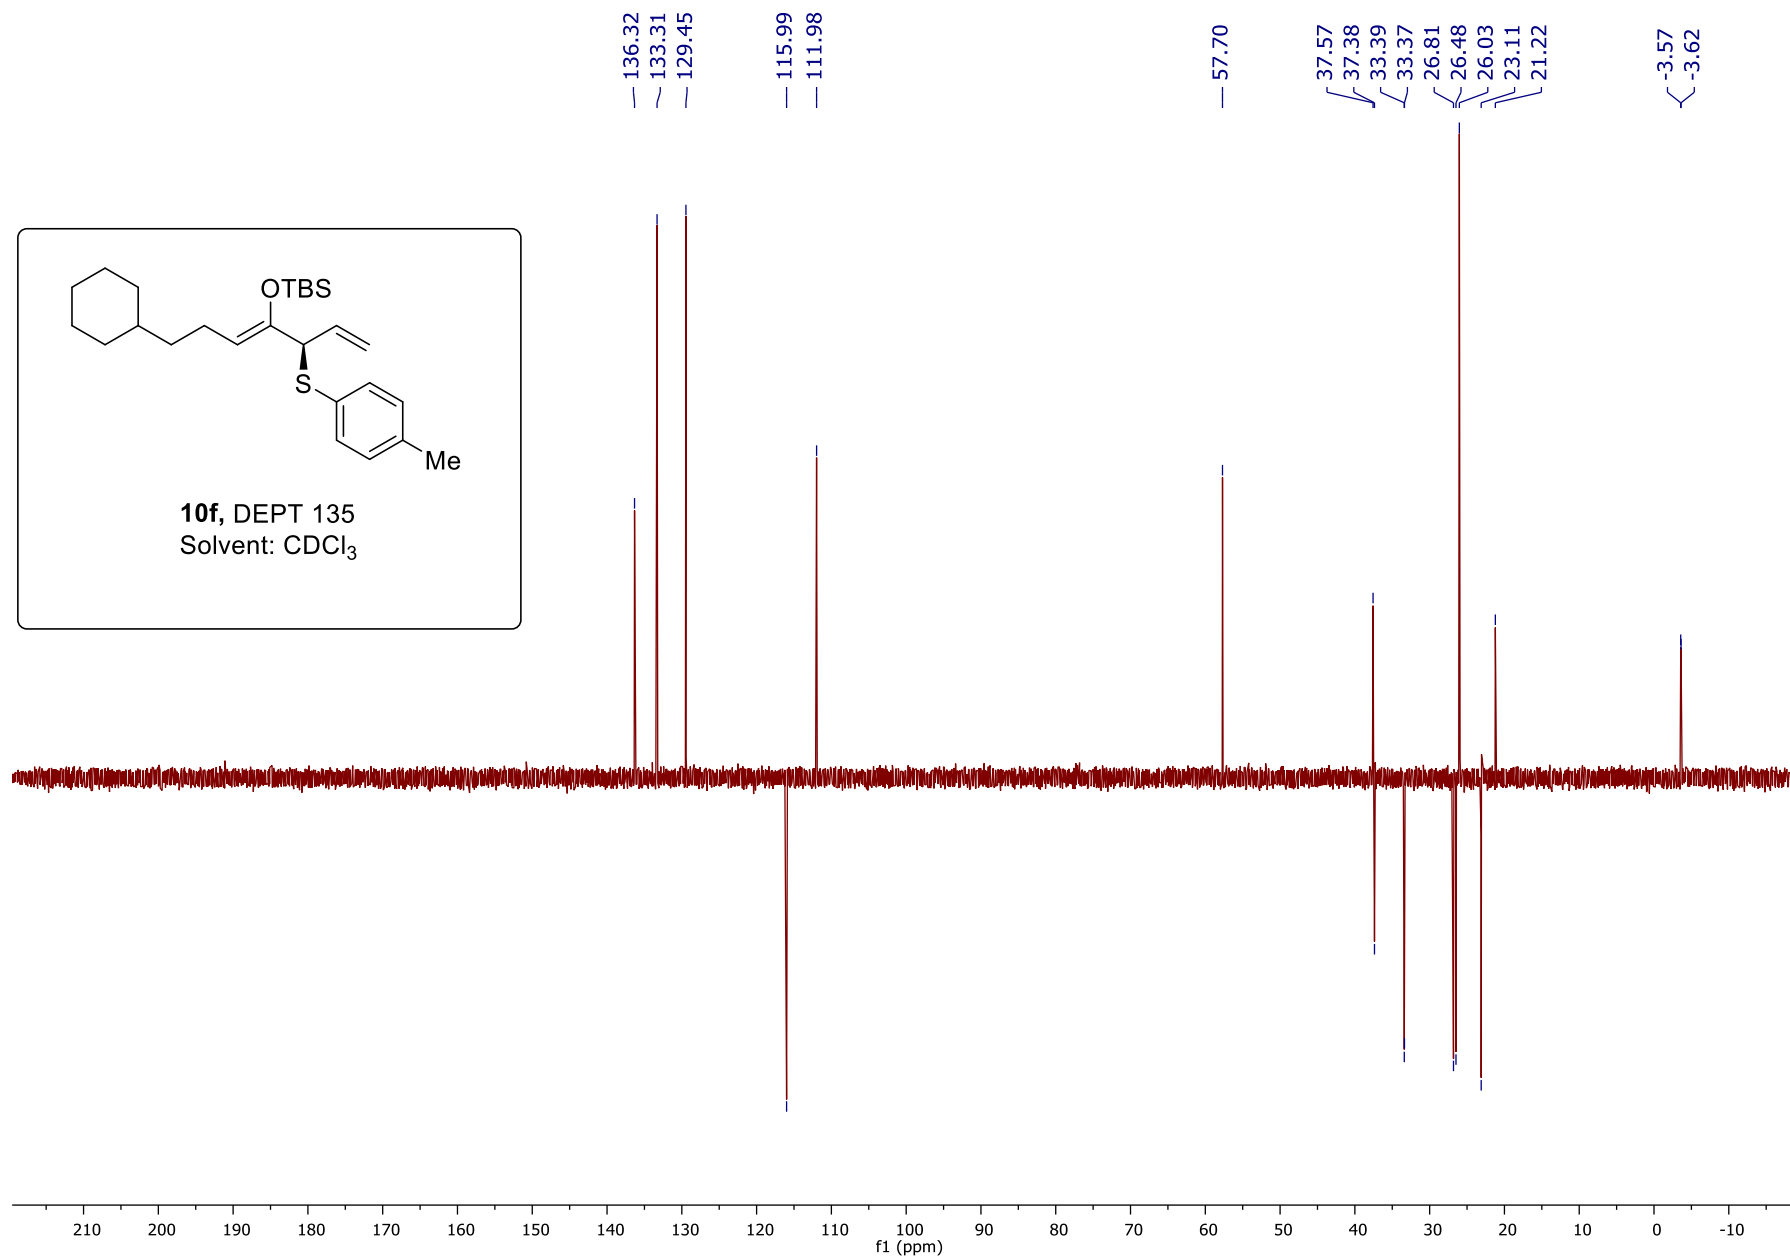



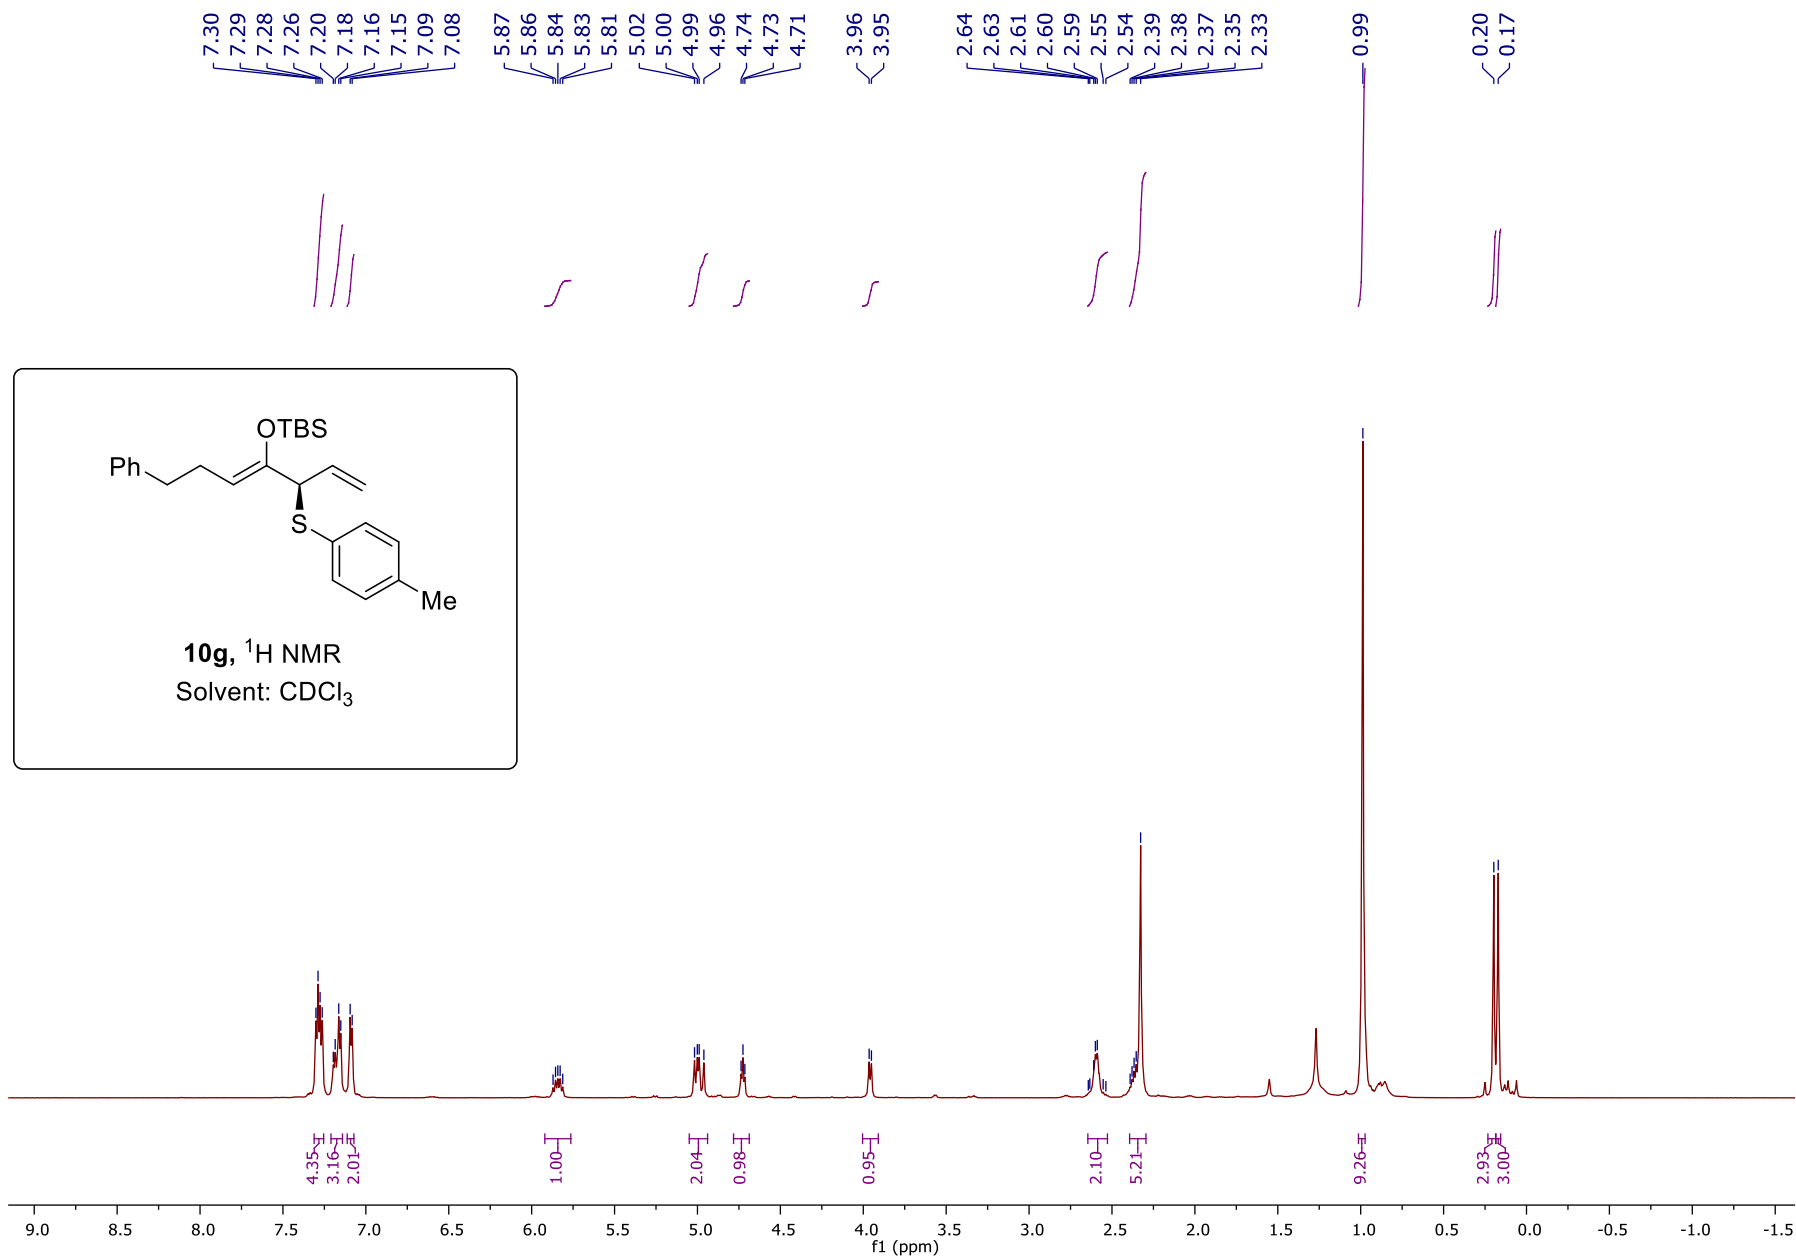

— 148.07  
— 142.22  
— 137.45  
— 136.17  
— 133.41  
— 131.25  
— 129.47  
— 128.49  
— 128.34  
— 125.79  
— 116.13  
— 110.60

— 77.31  
— 77.10  
— 76.89

— 57.59

— 35.89

— 27.47  
— 26.02  
— 21.22  
— 18.54

— -3.54  
— -3.59

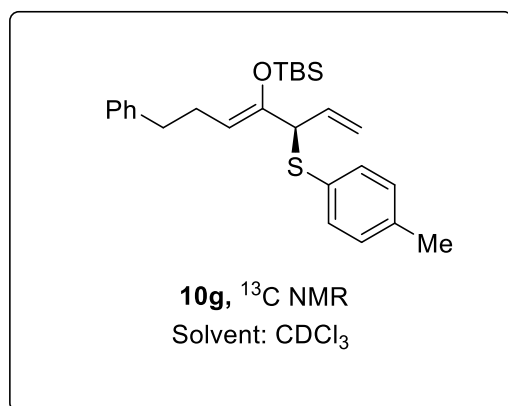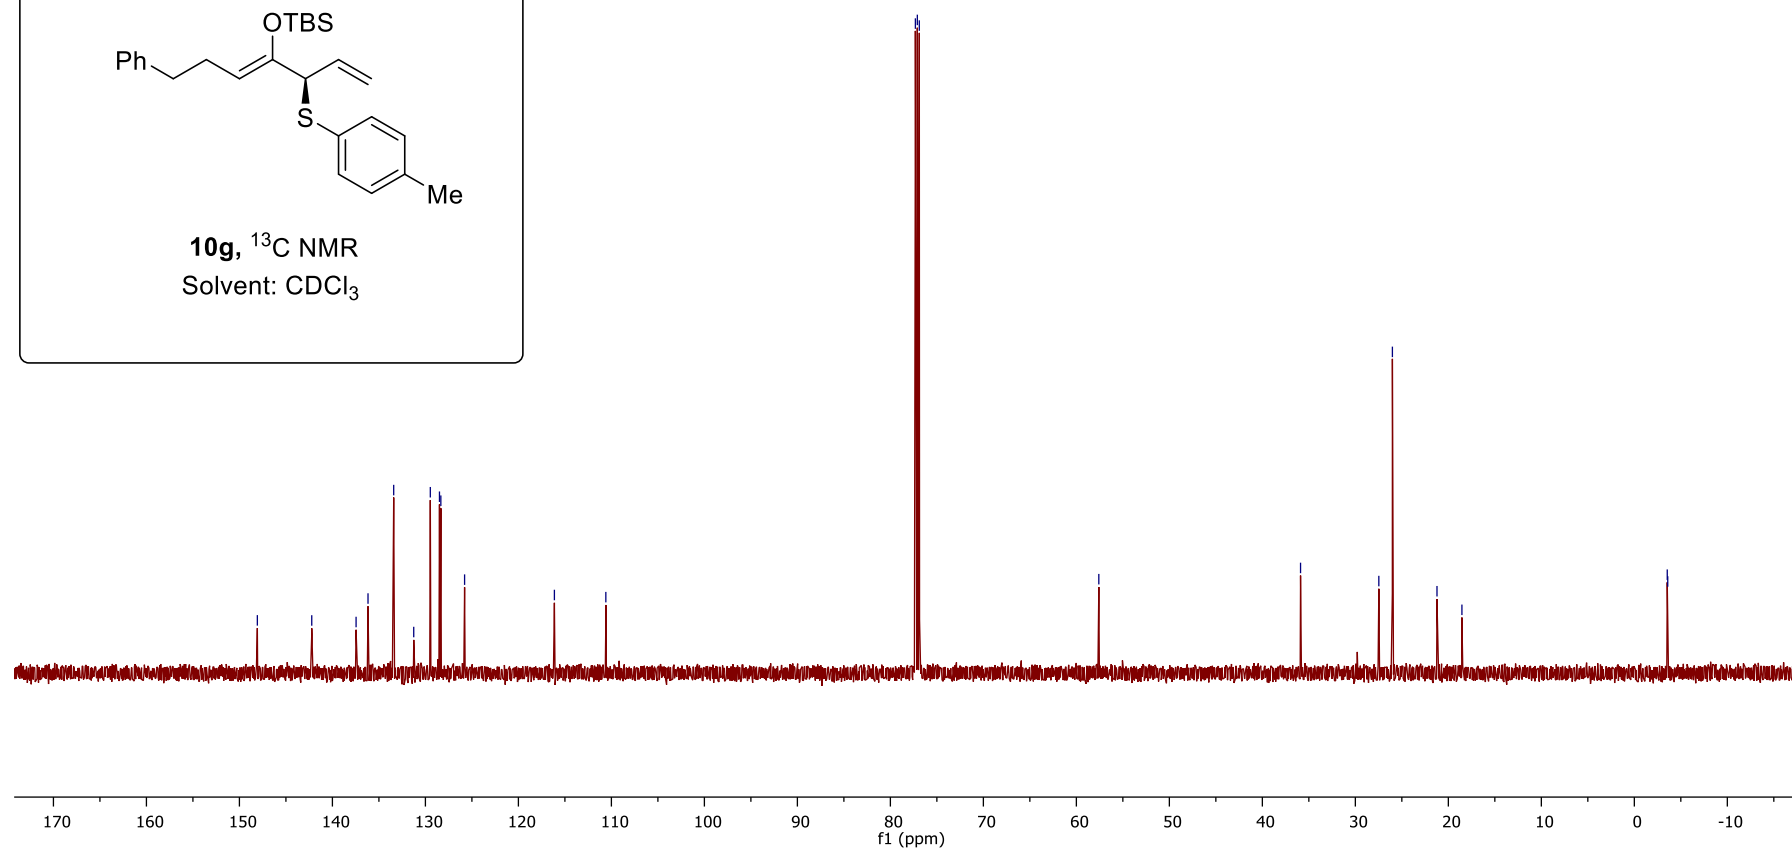

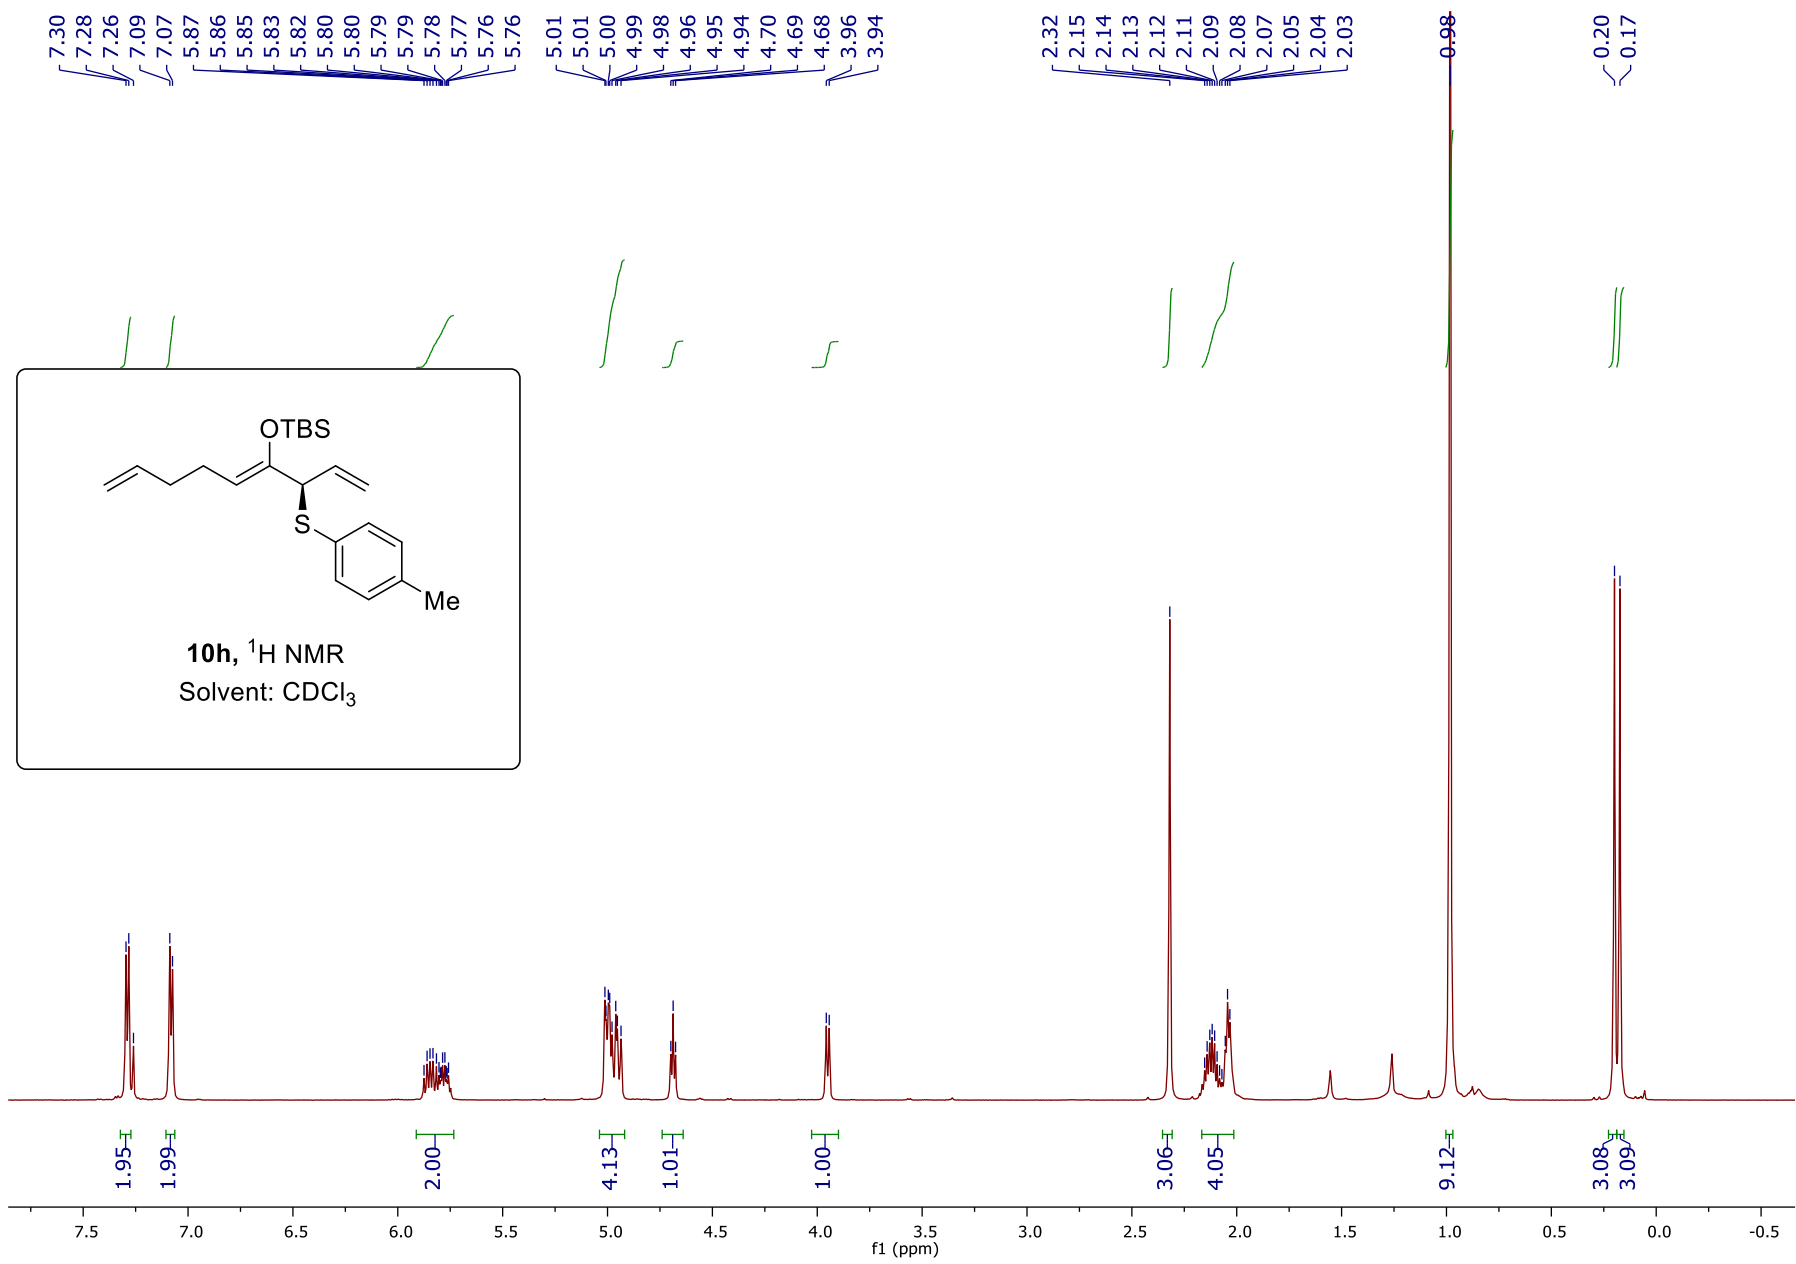

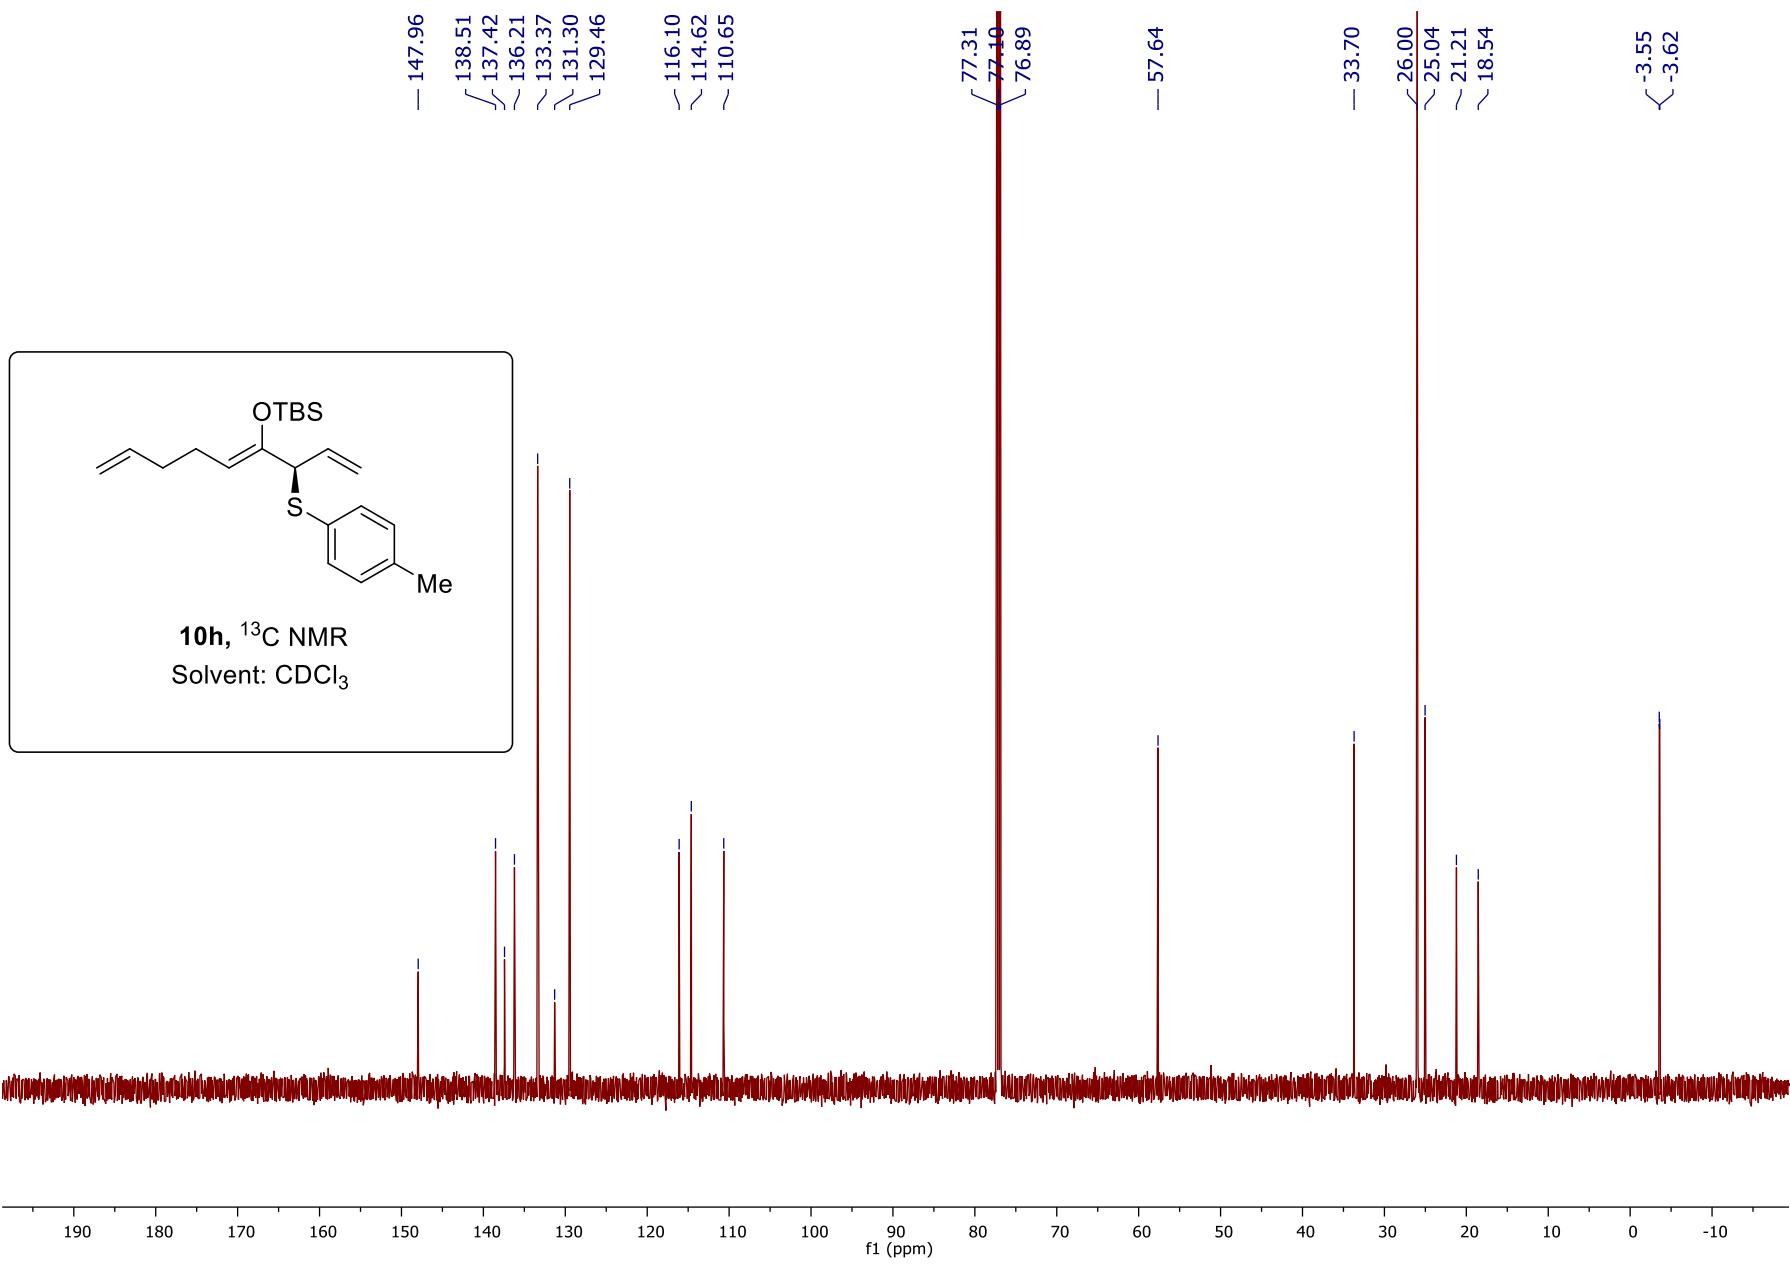

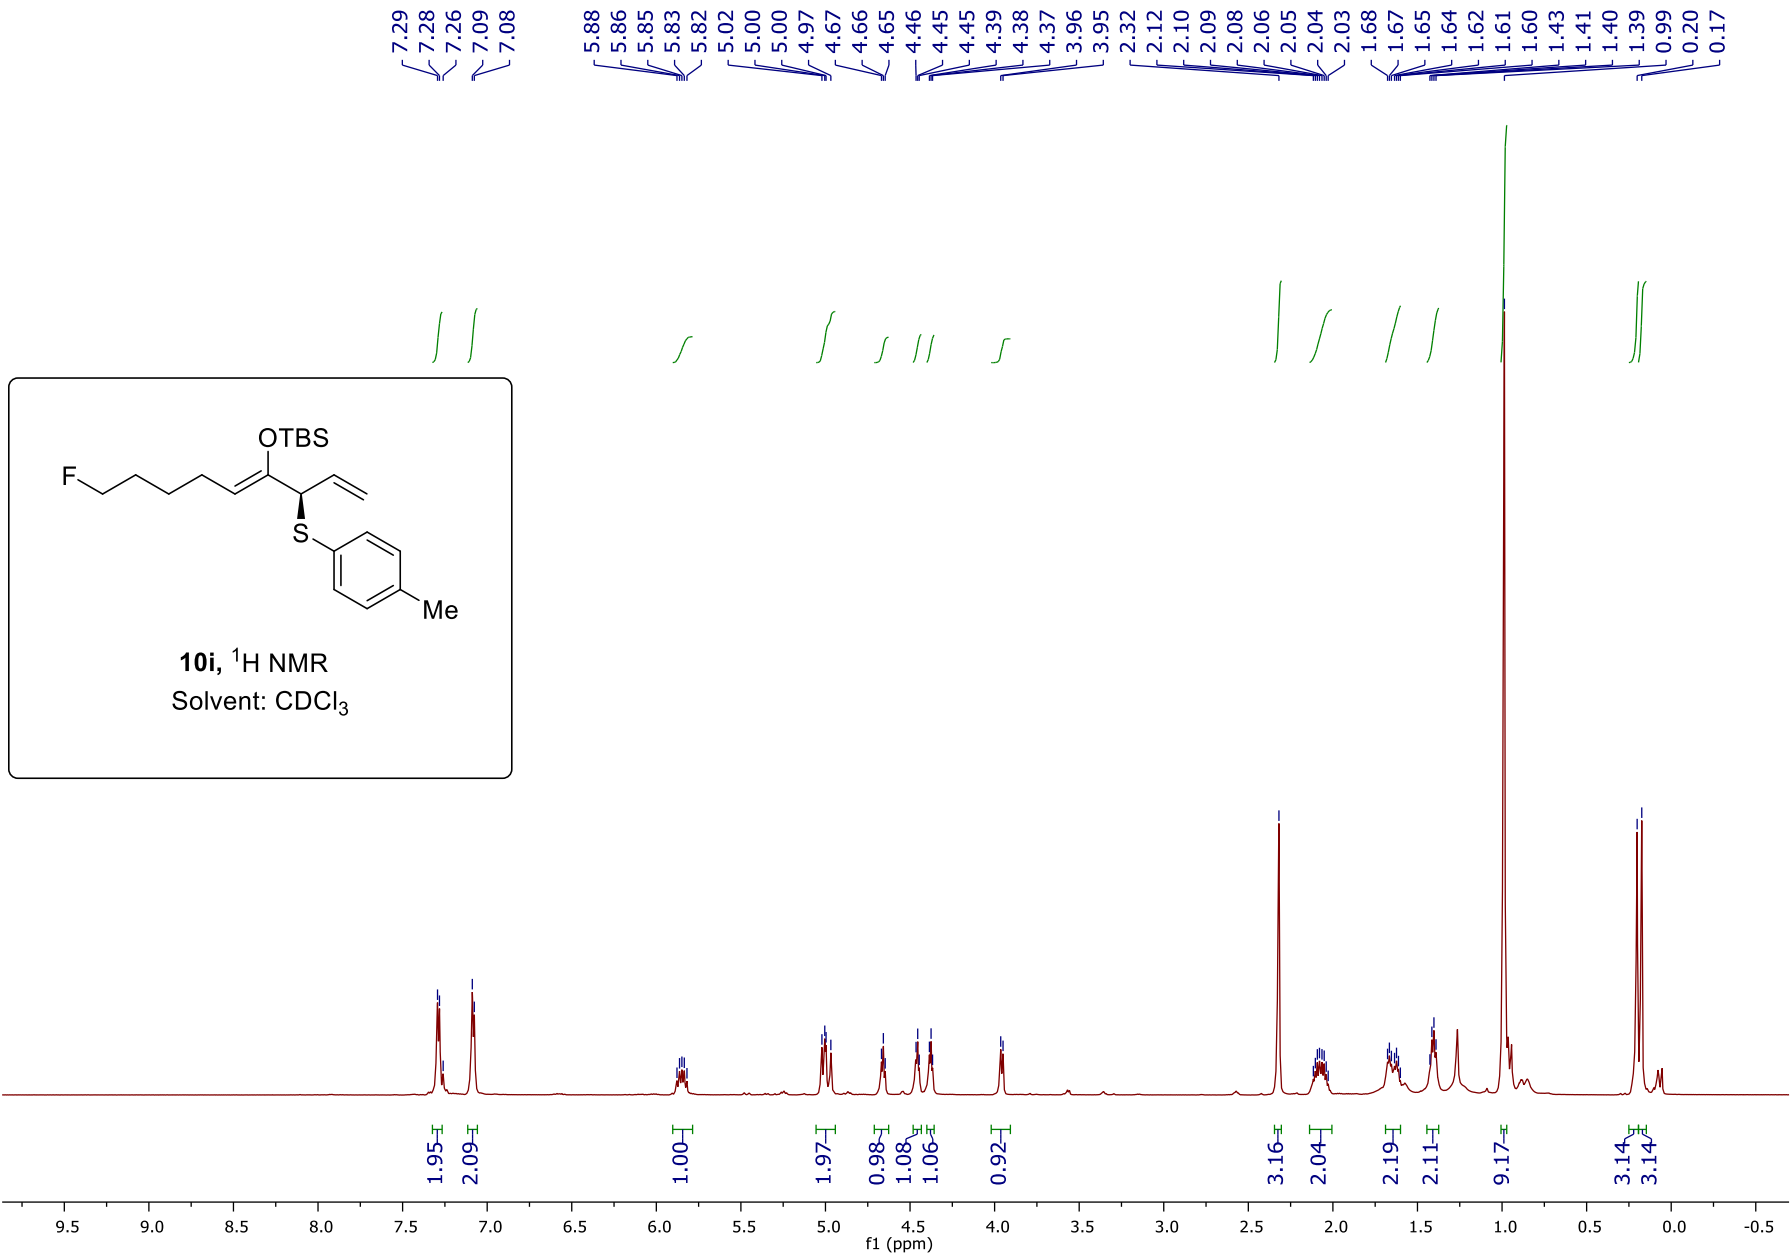

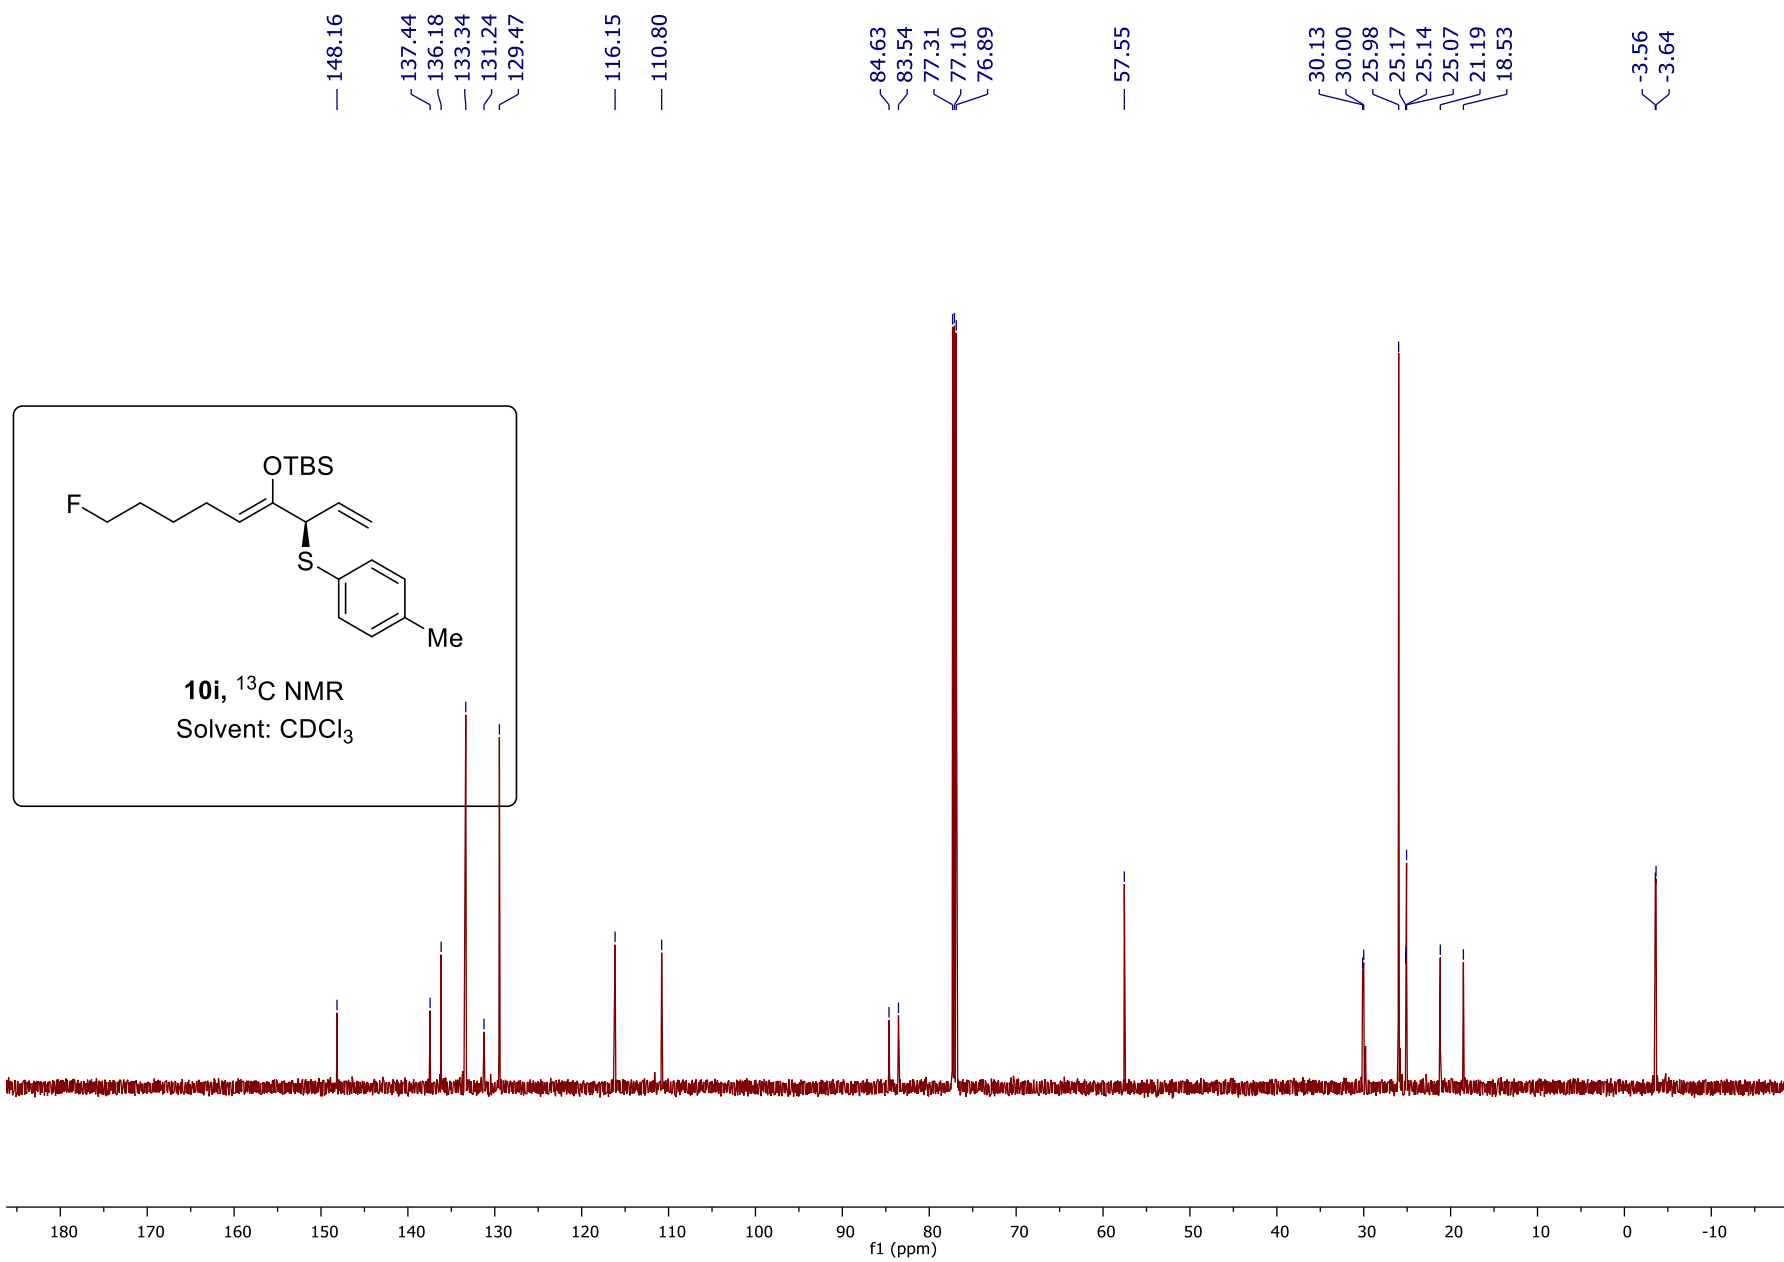

-217.21  
-217.28  
-217.34  
-217.40  
-217.46  
-217.53  
-217.59

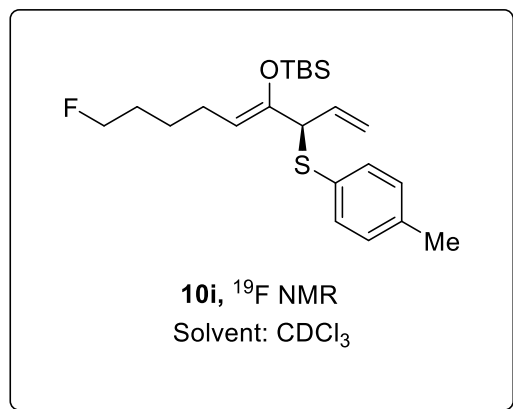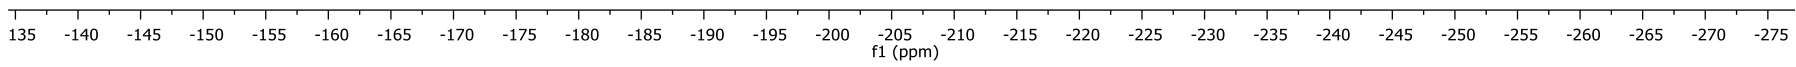

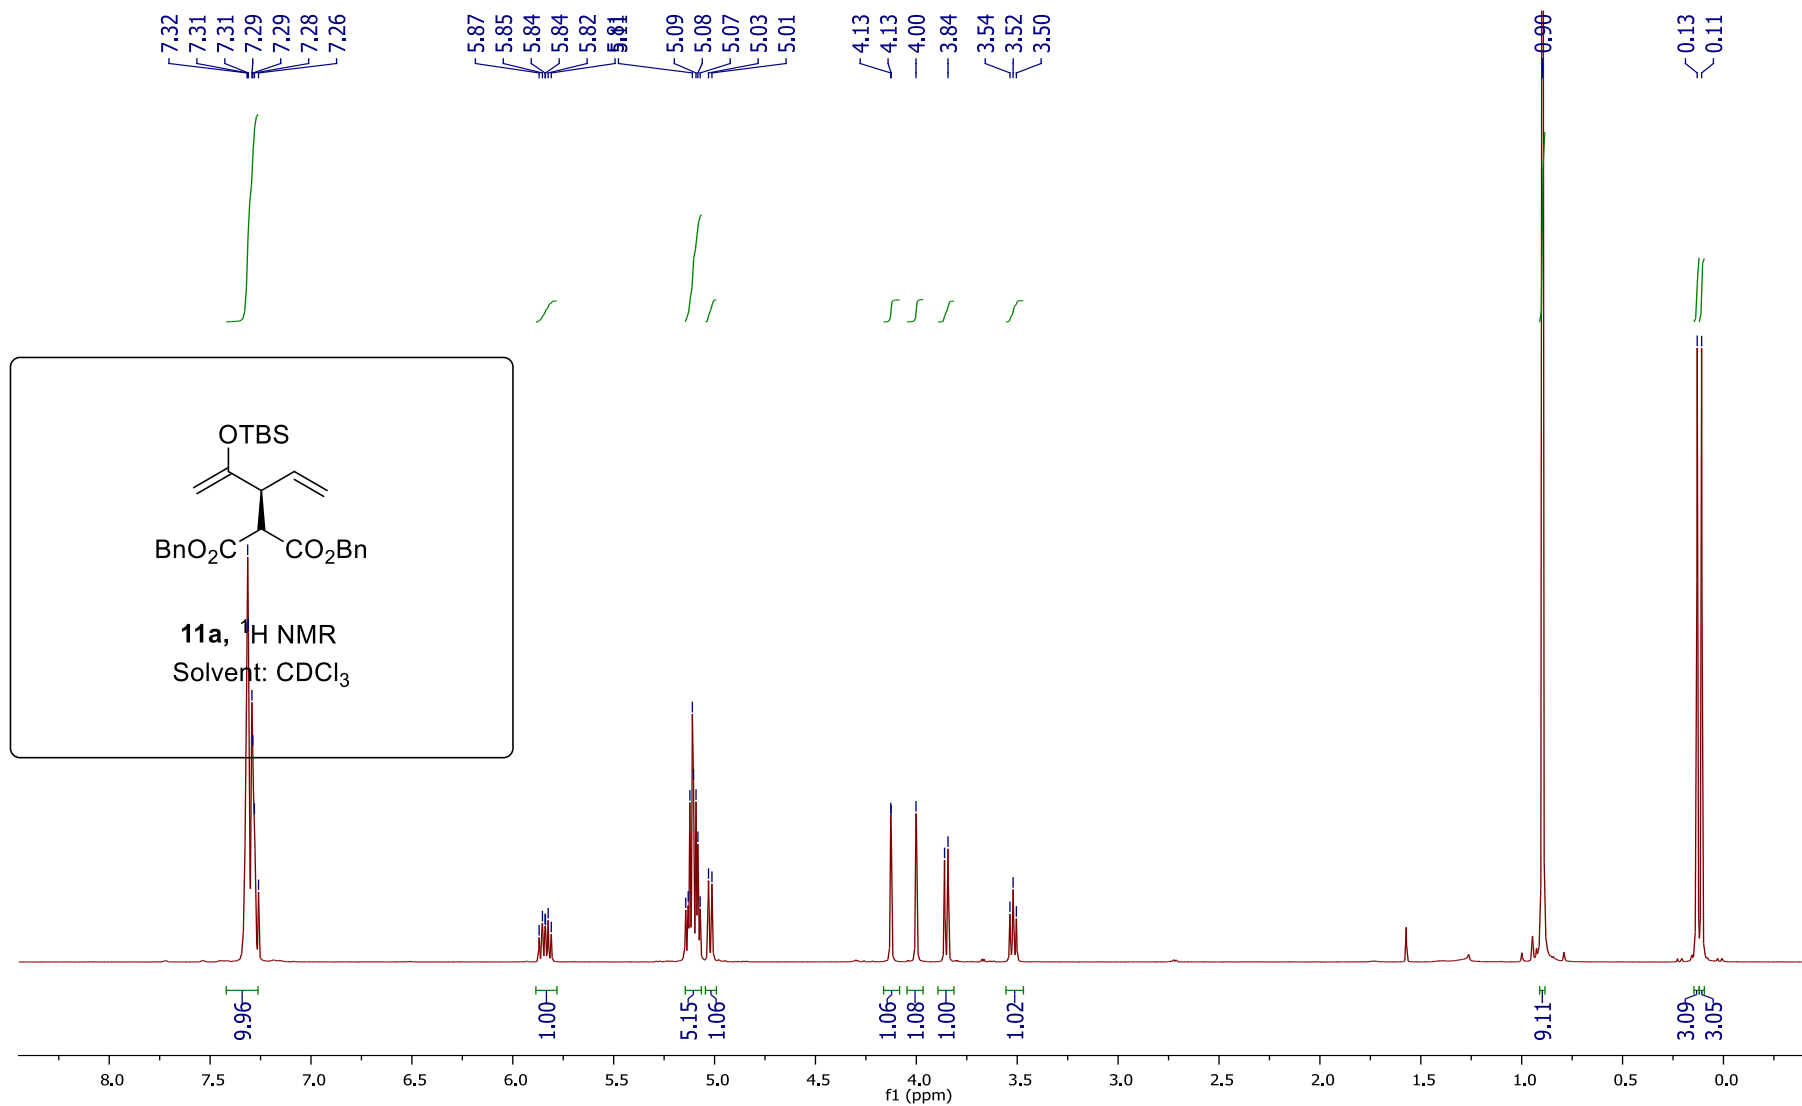



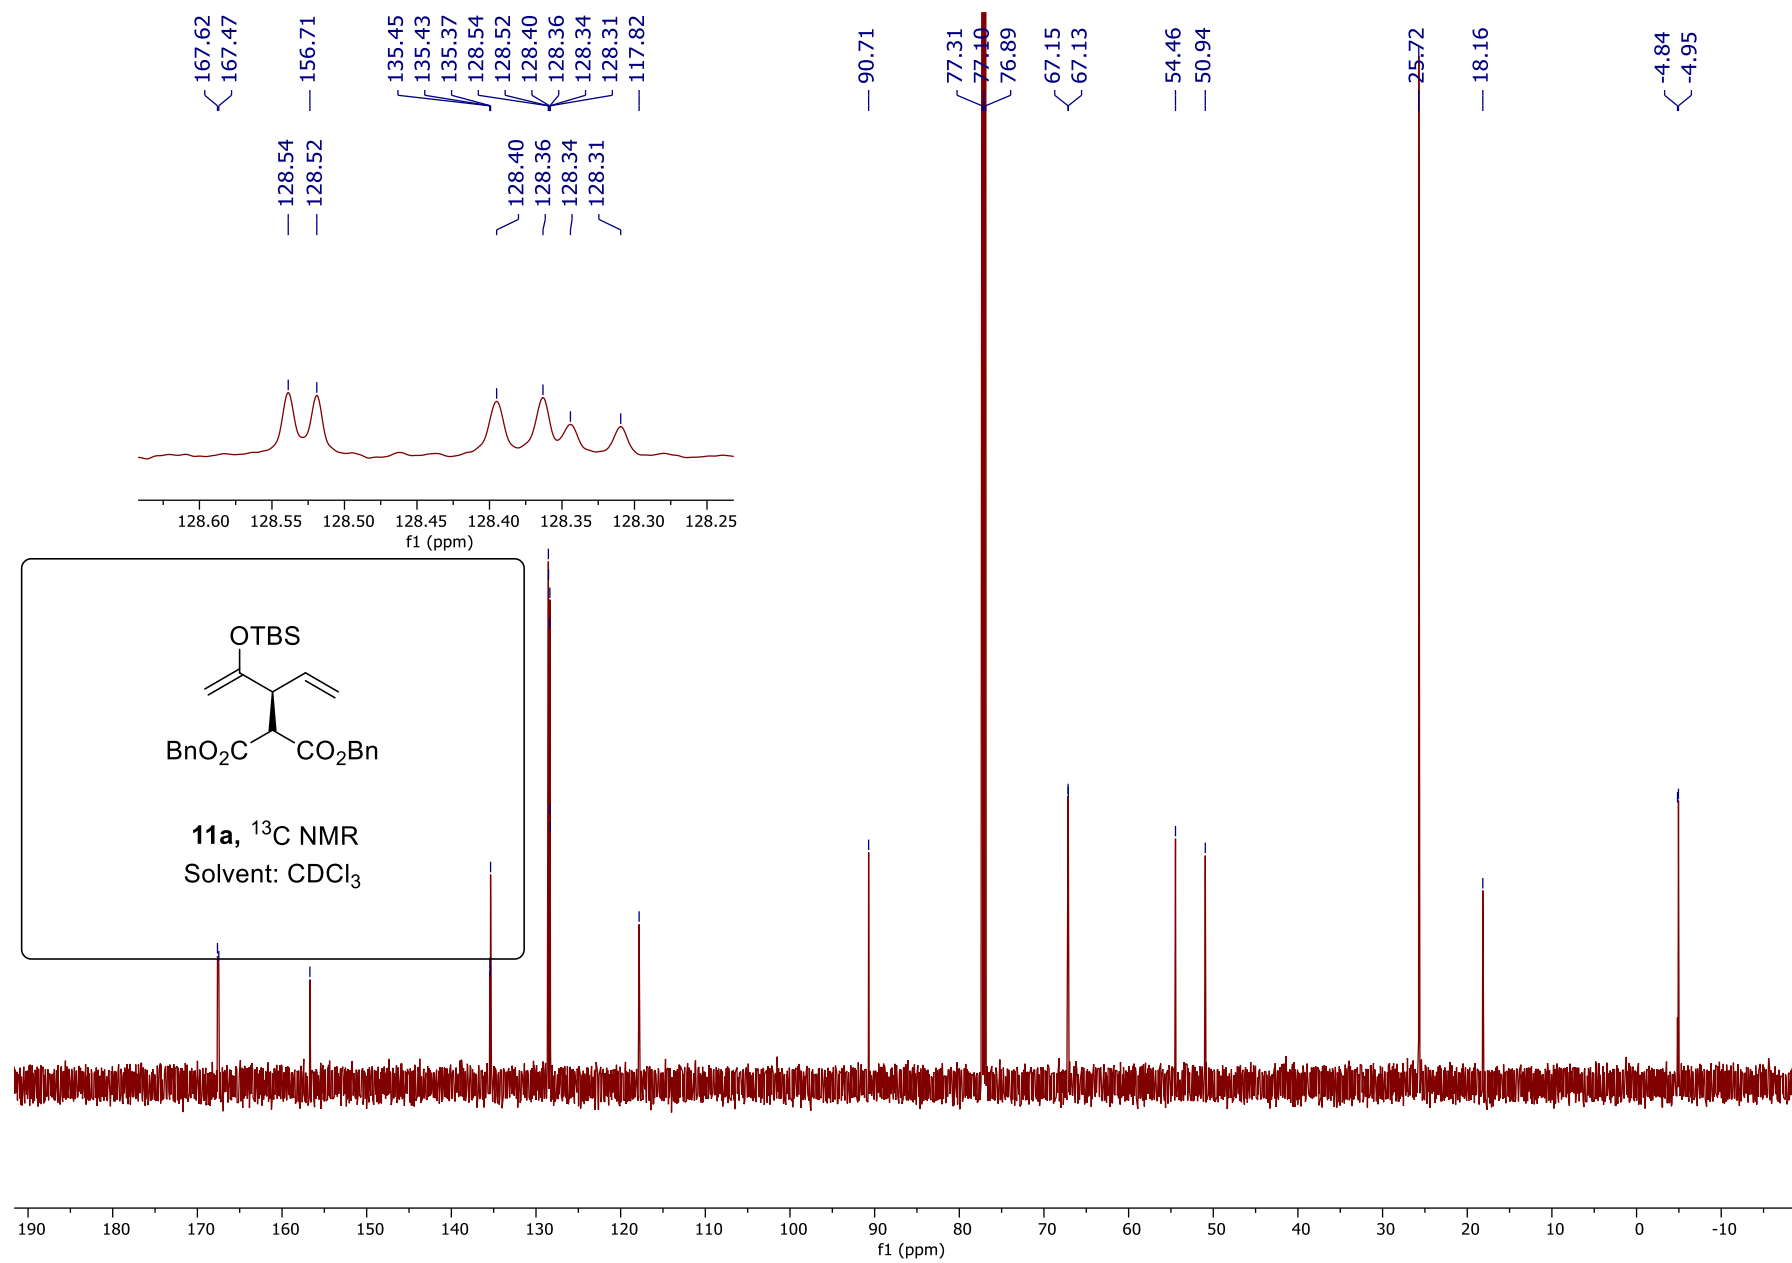

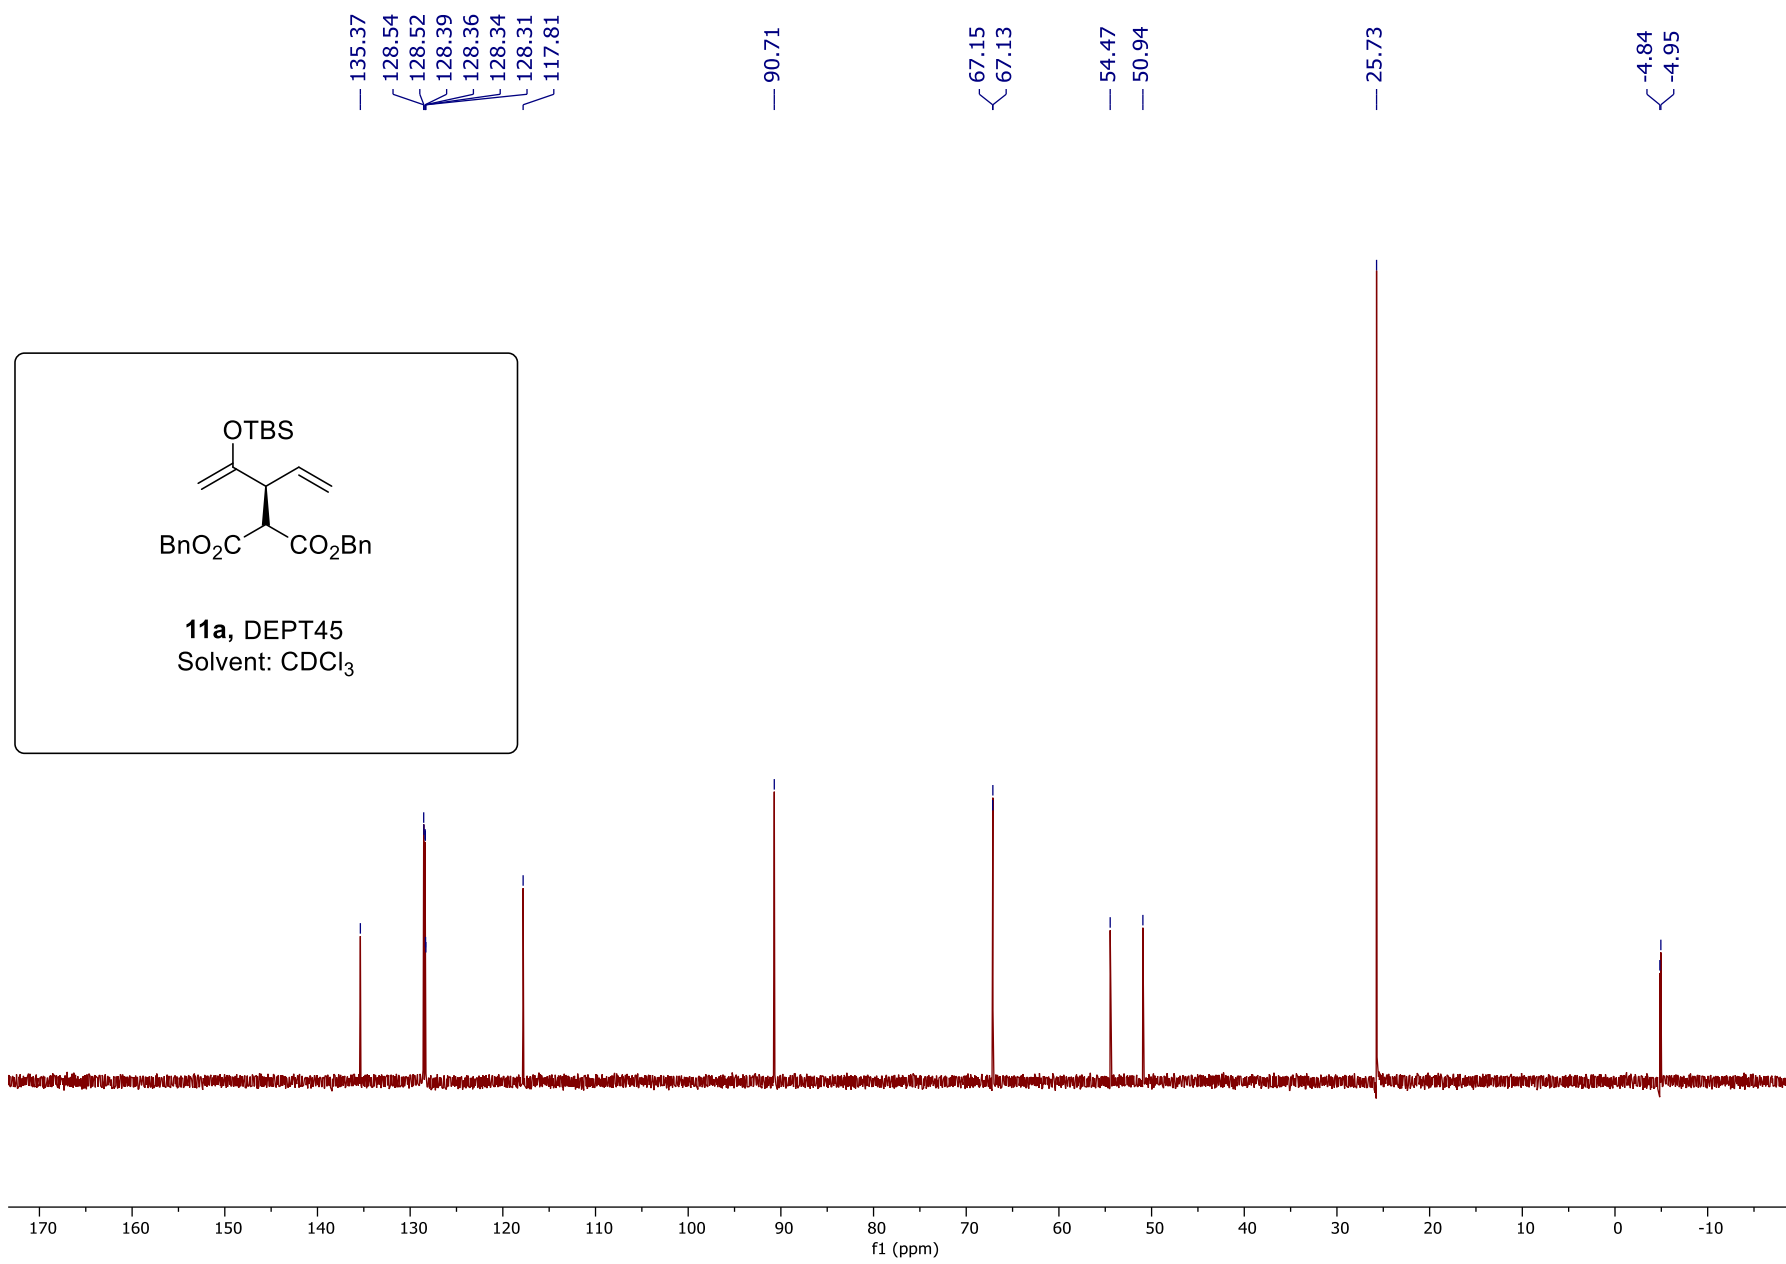

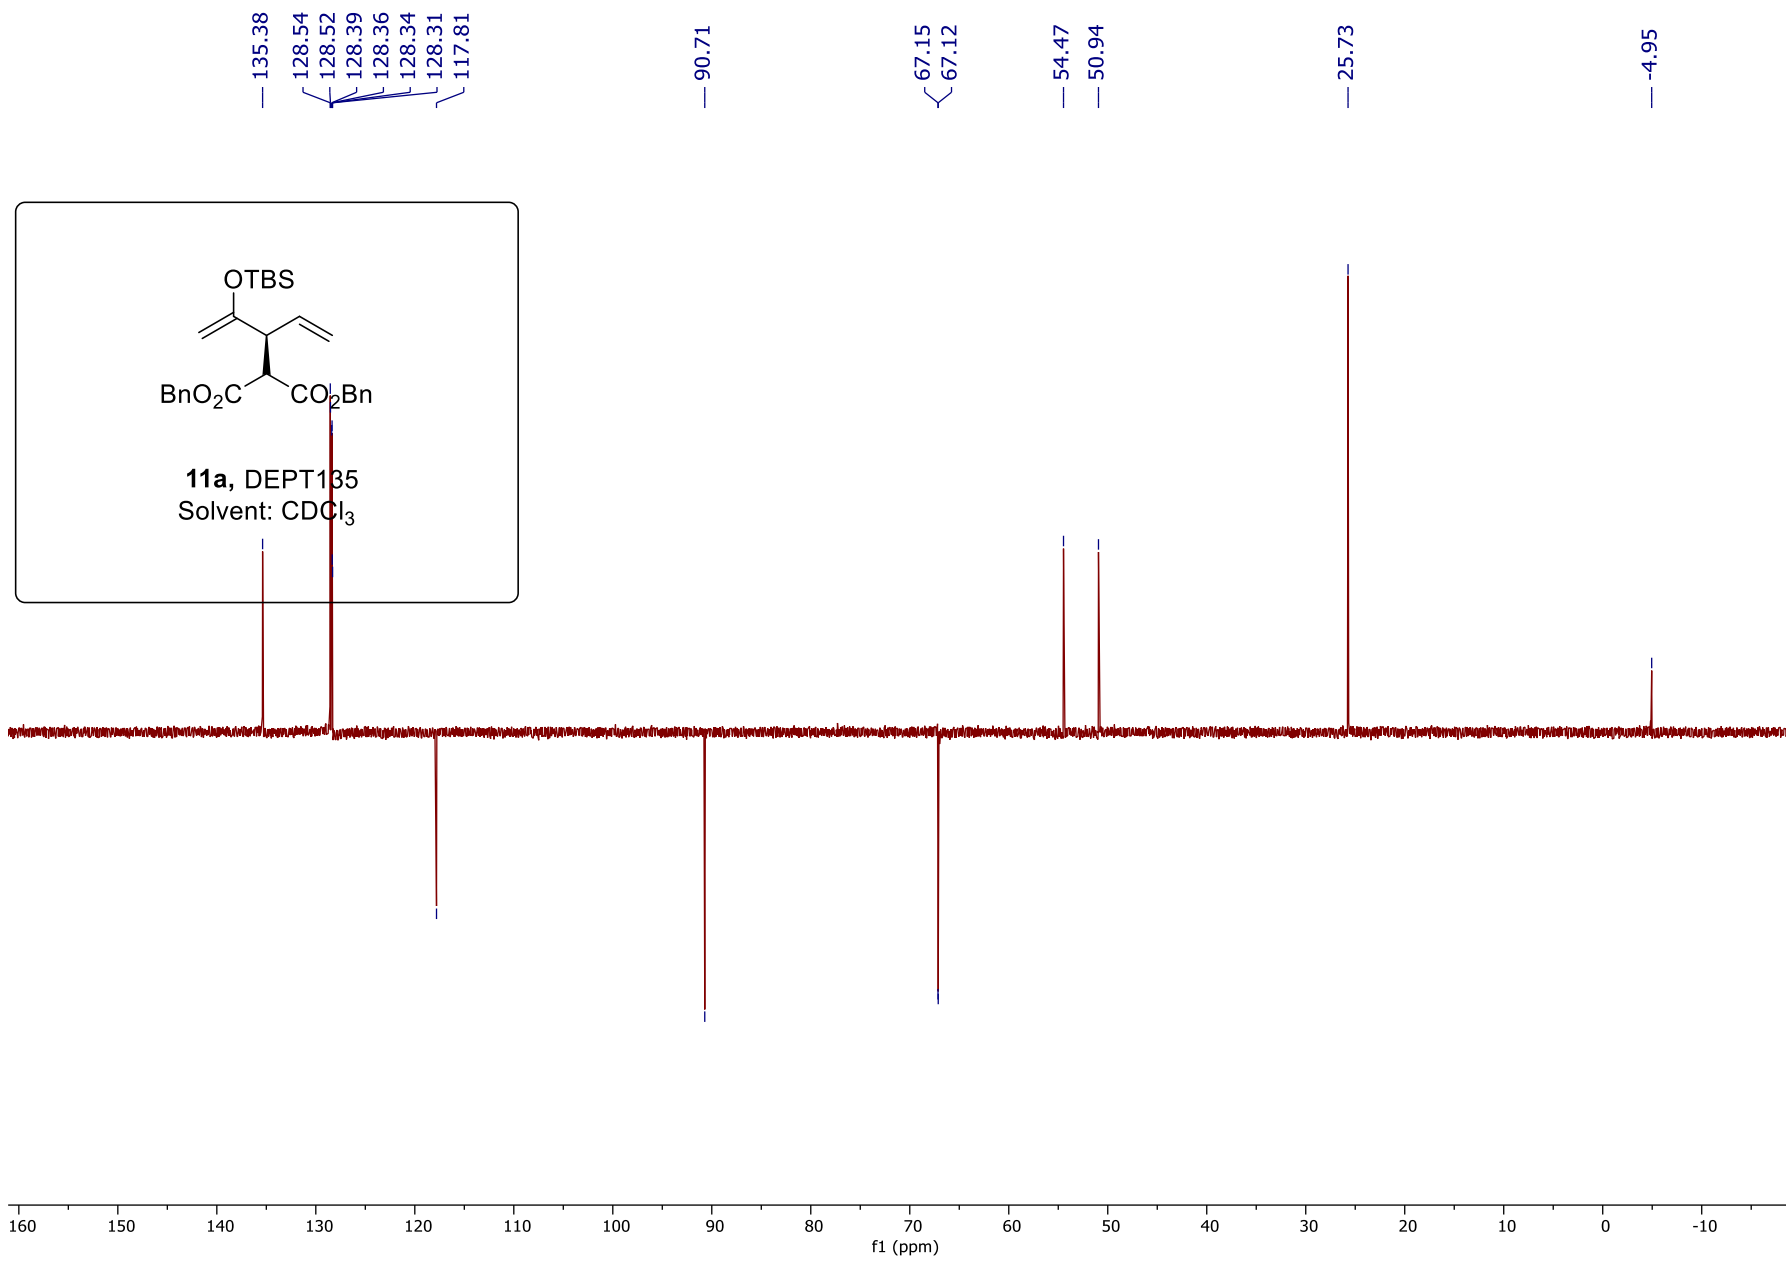

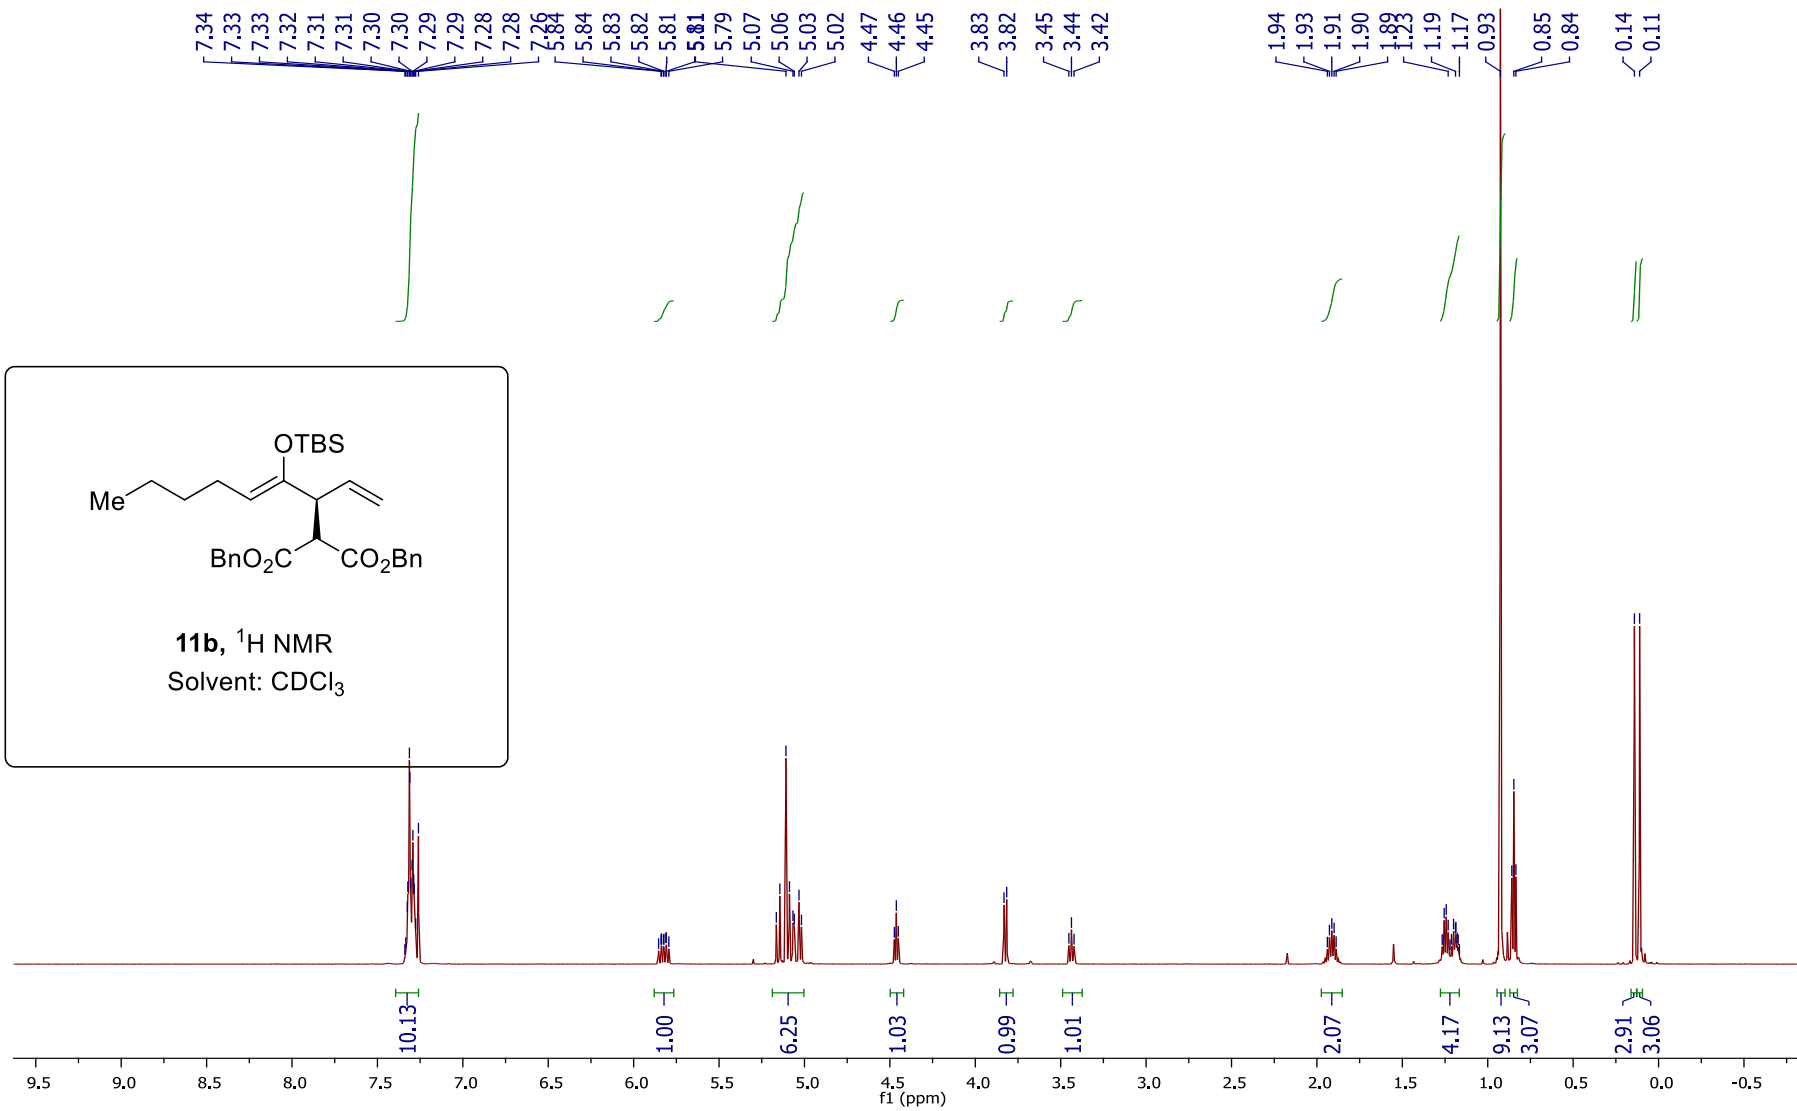

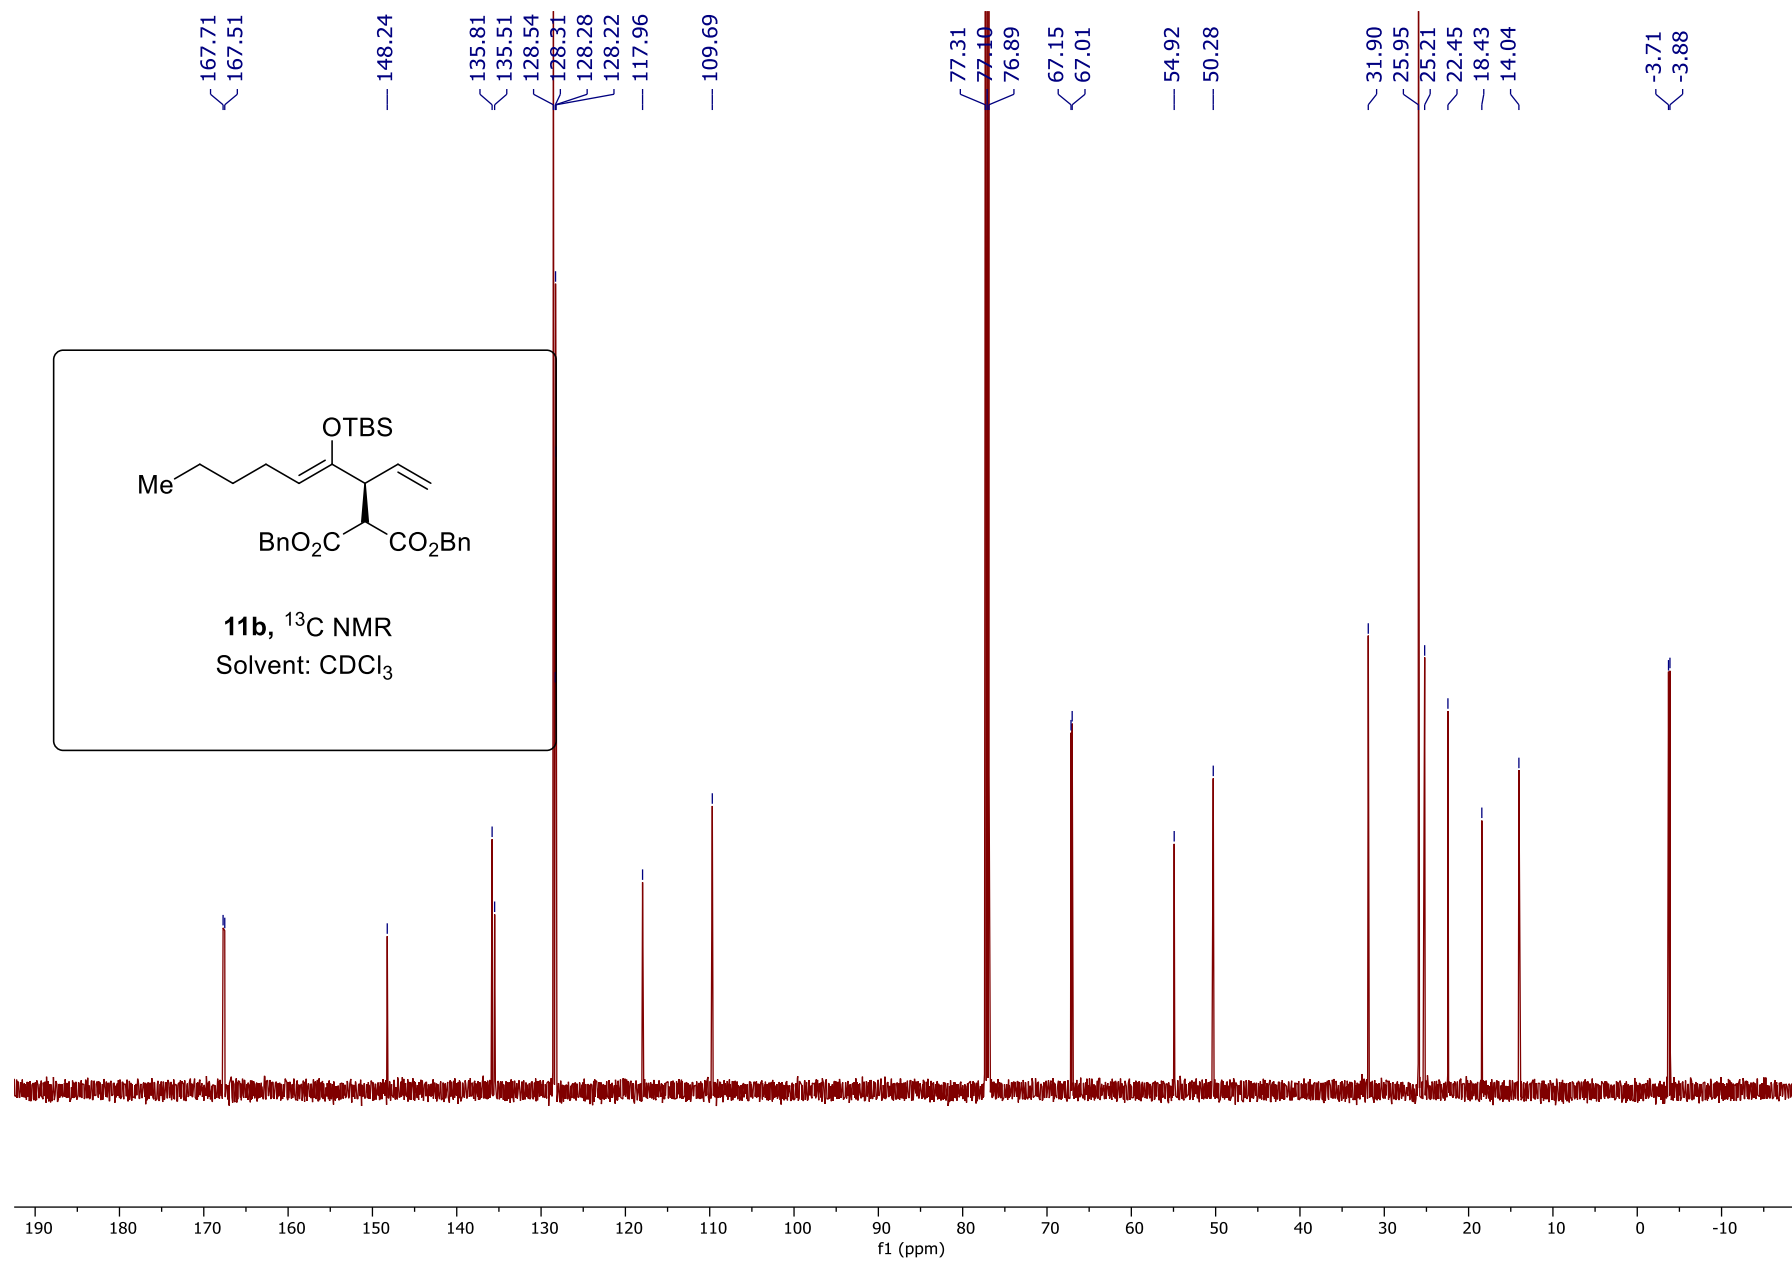

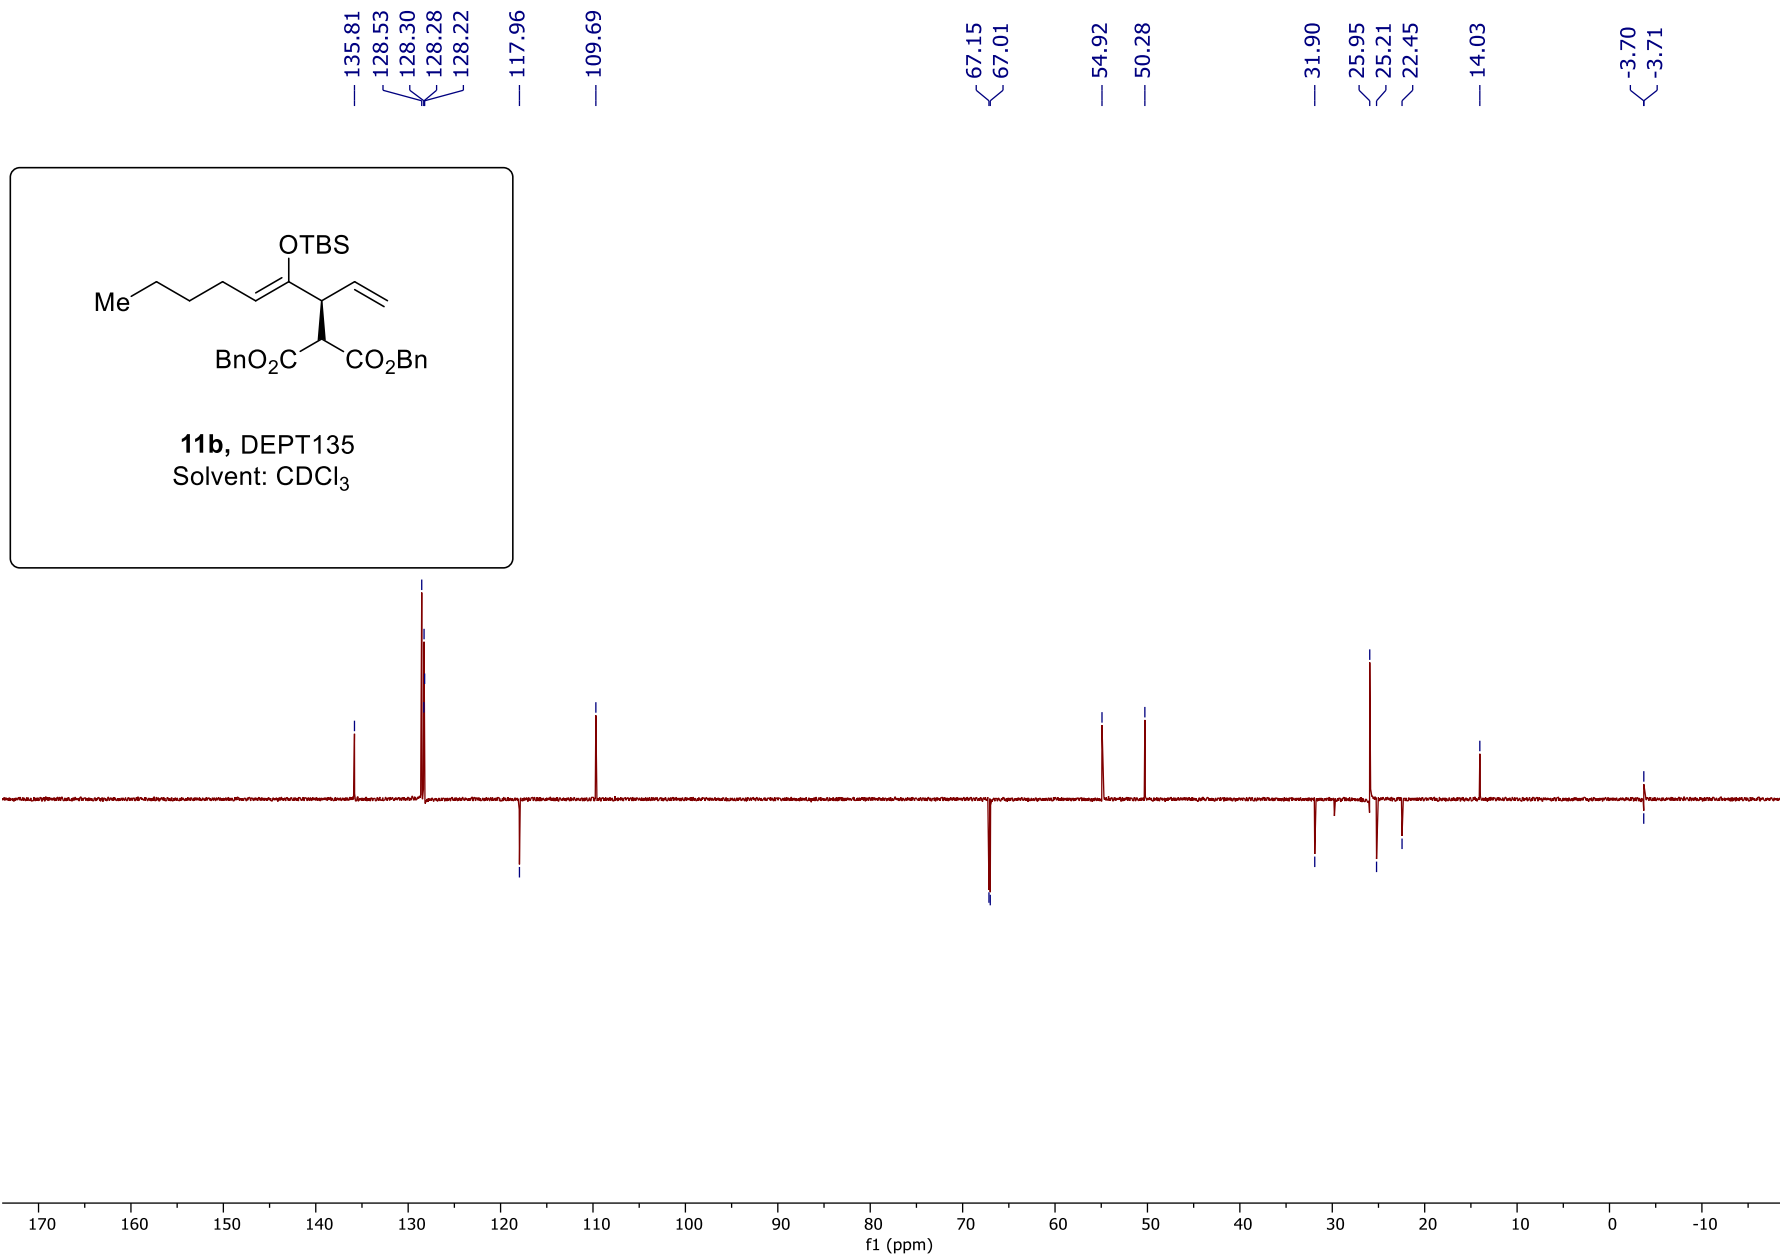

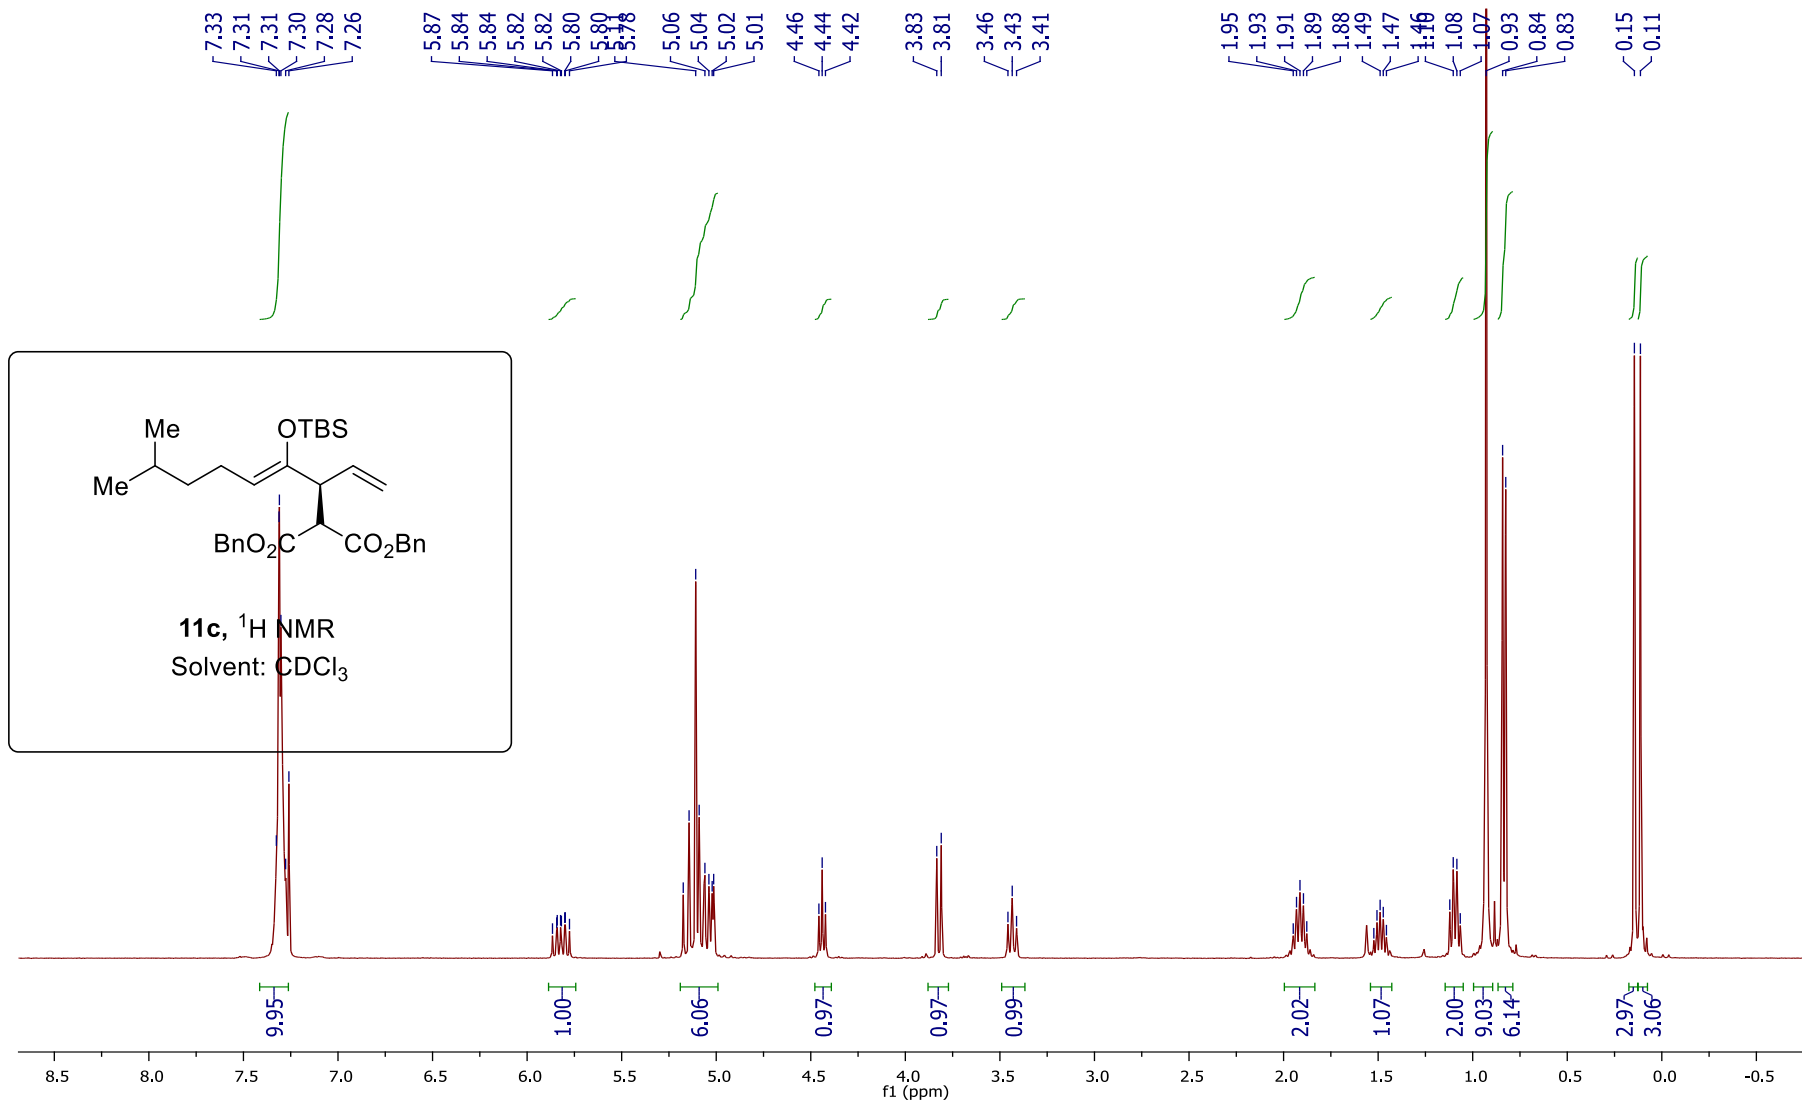

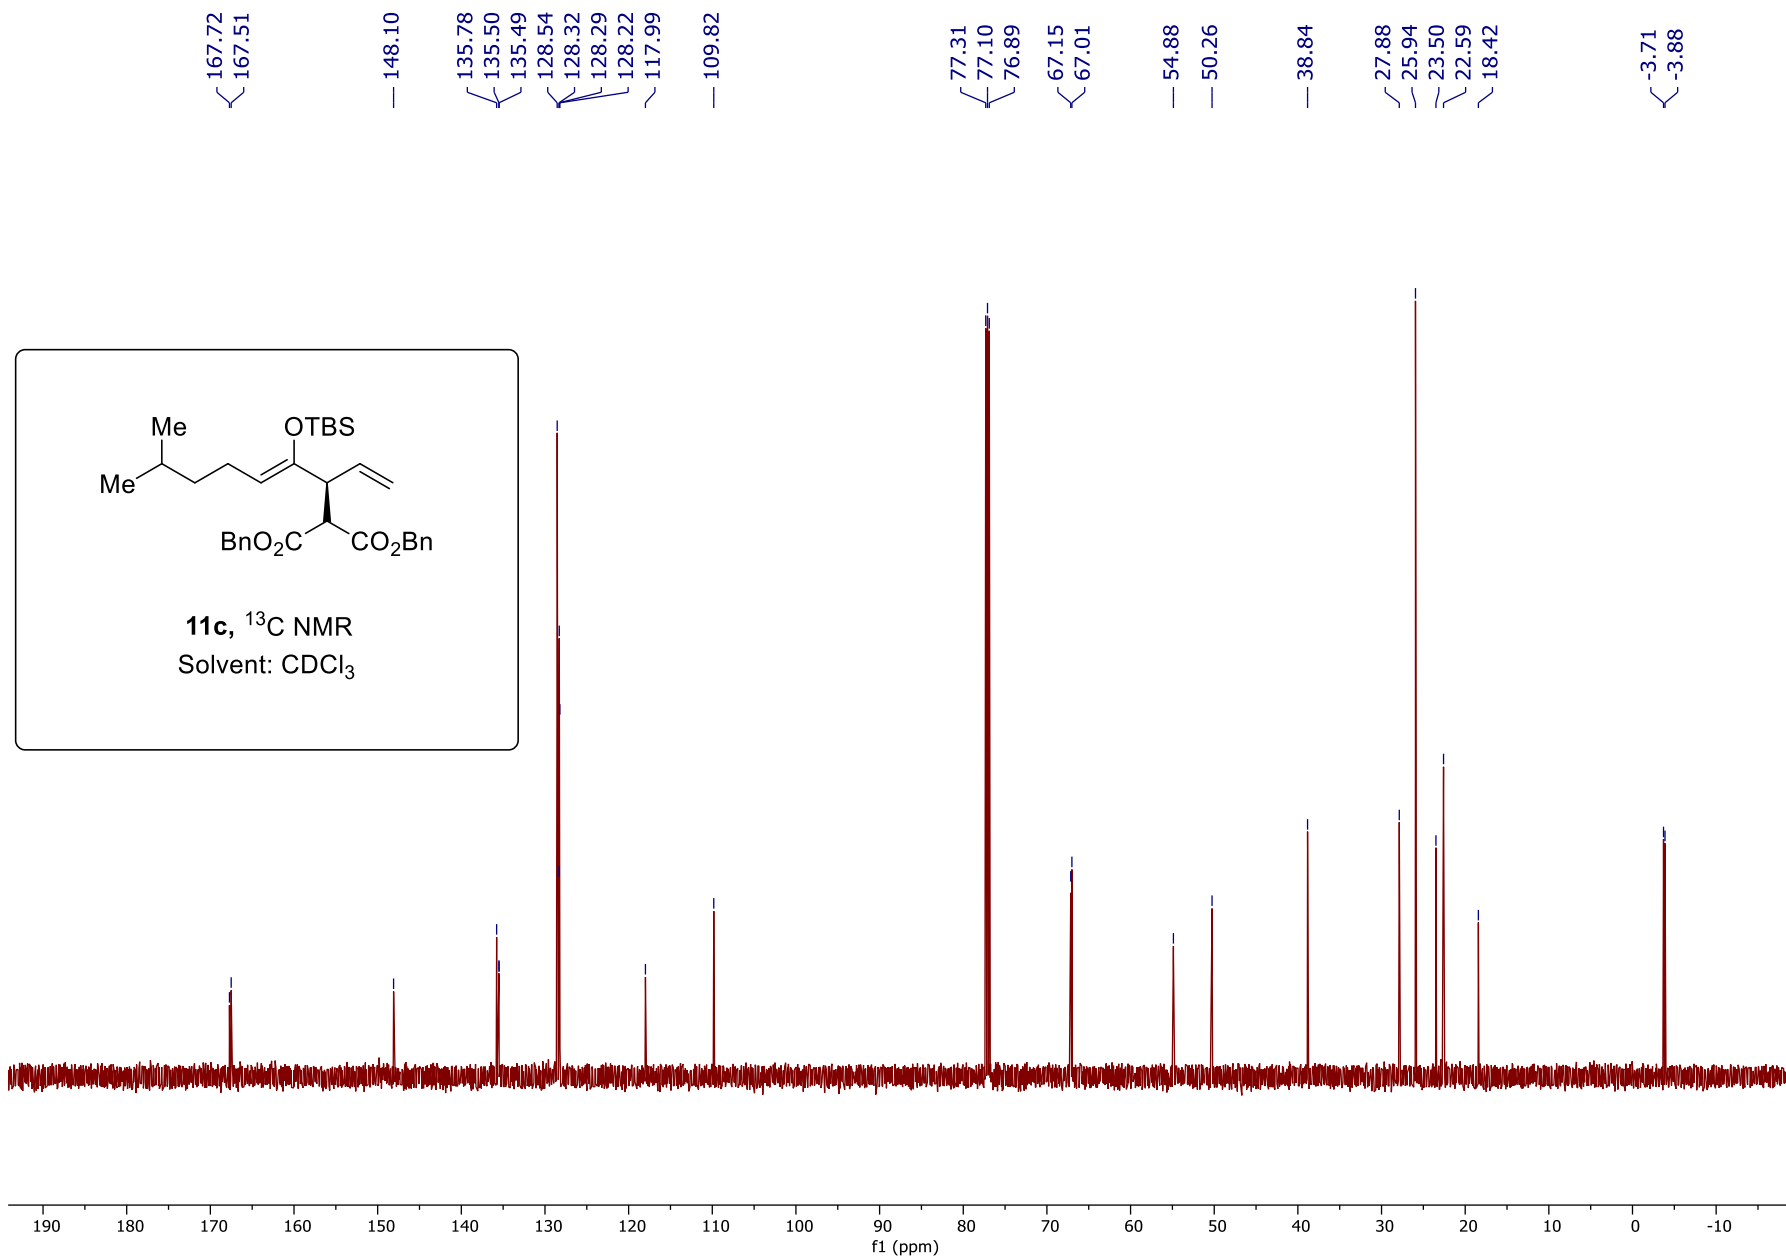



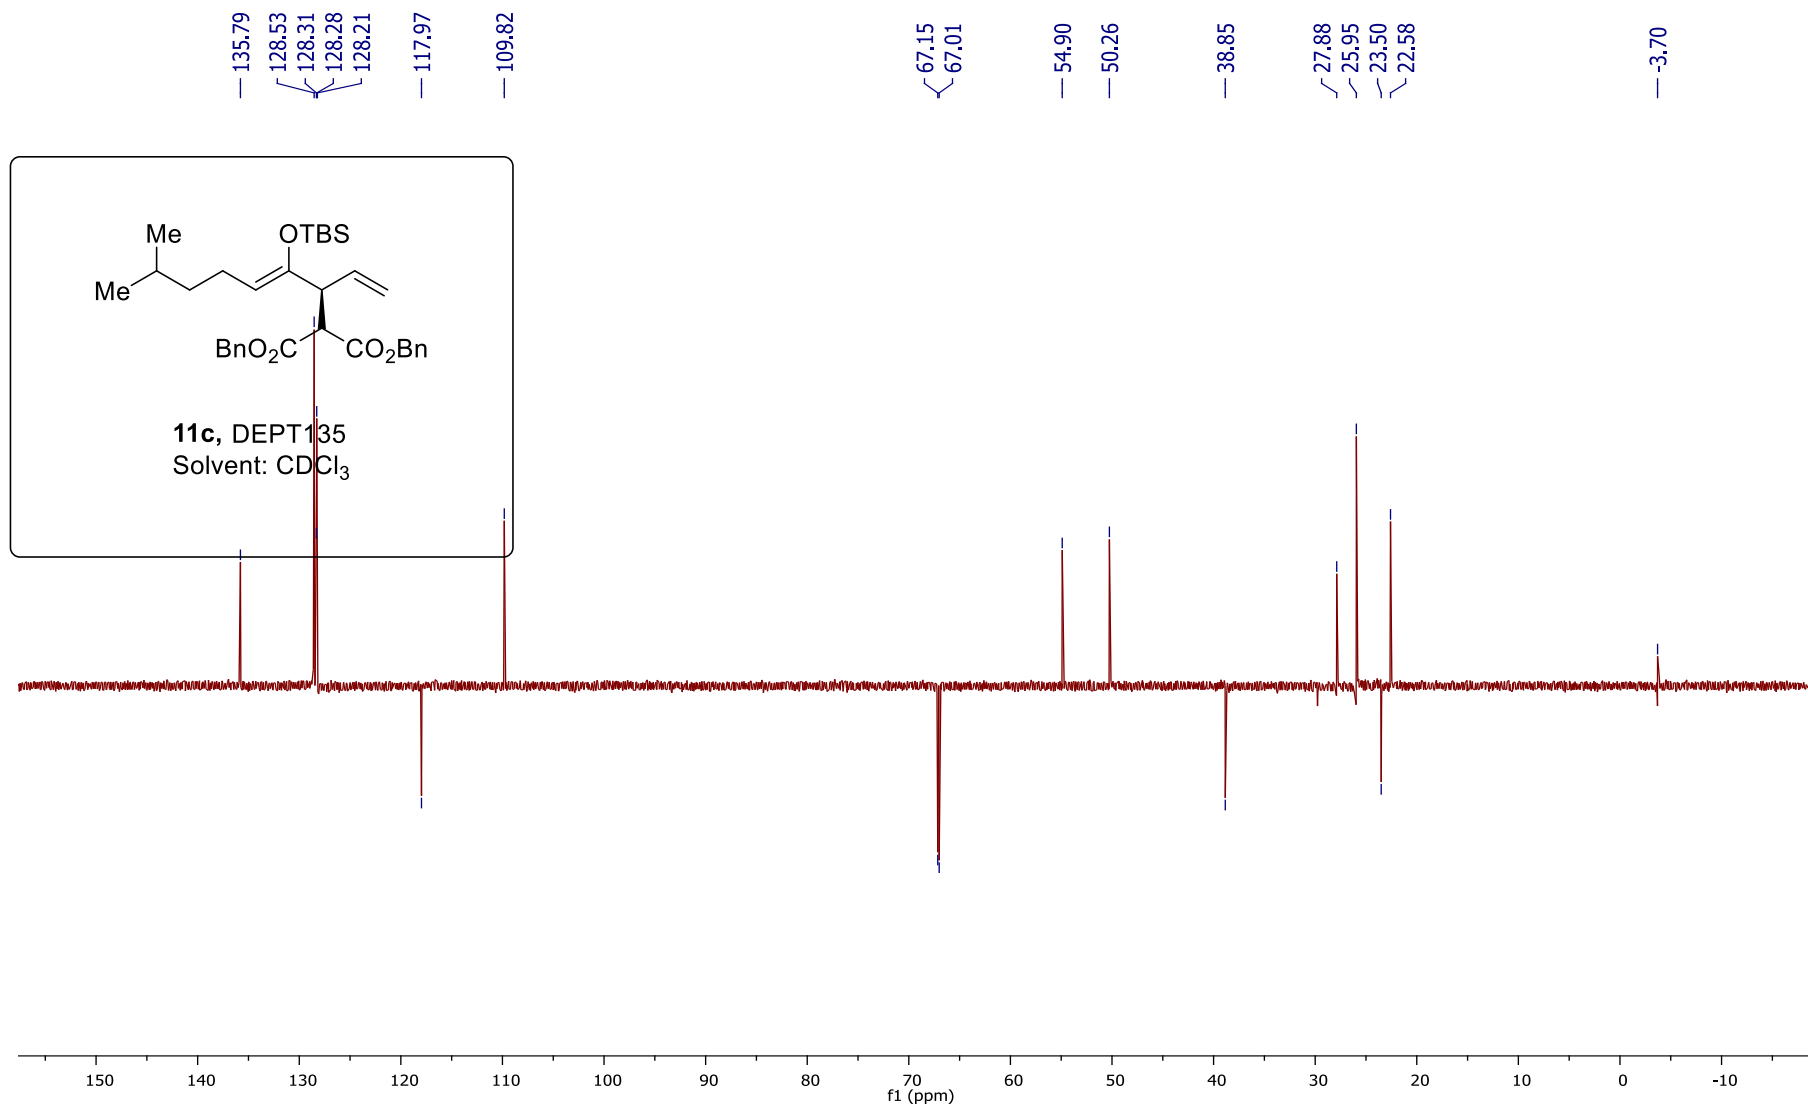

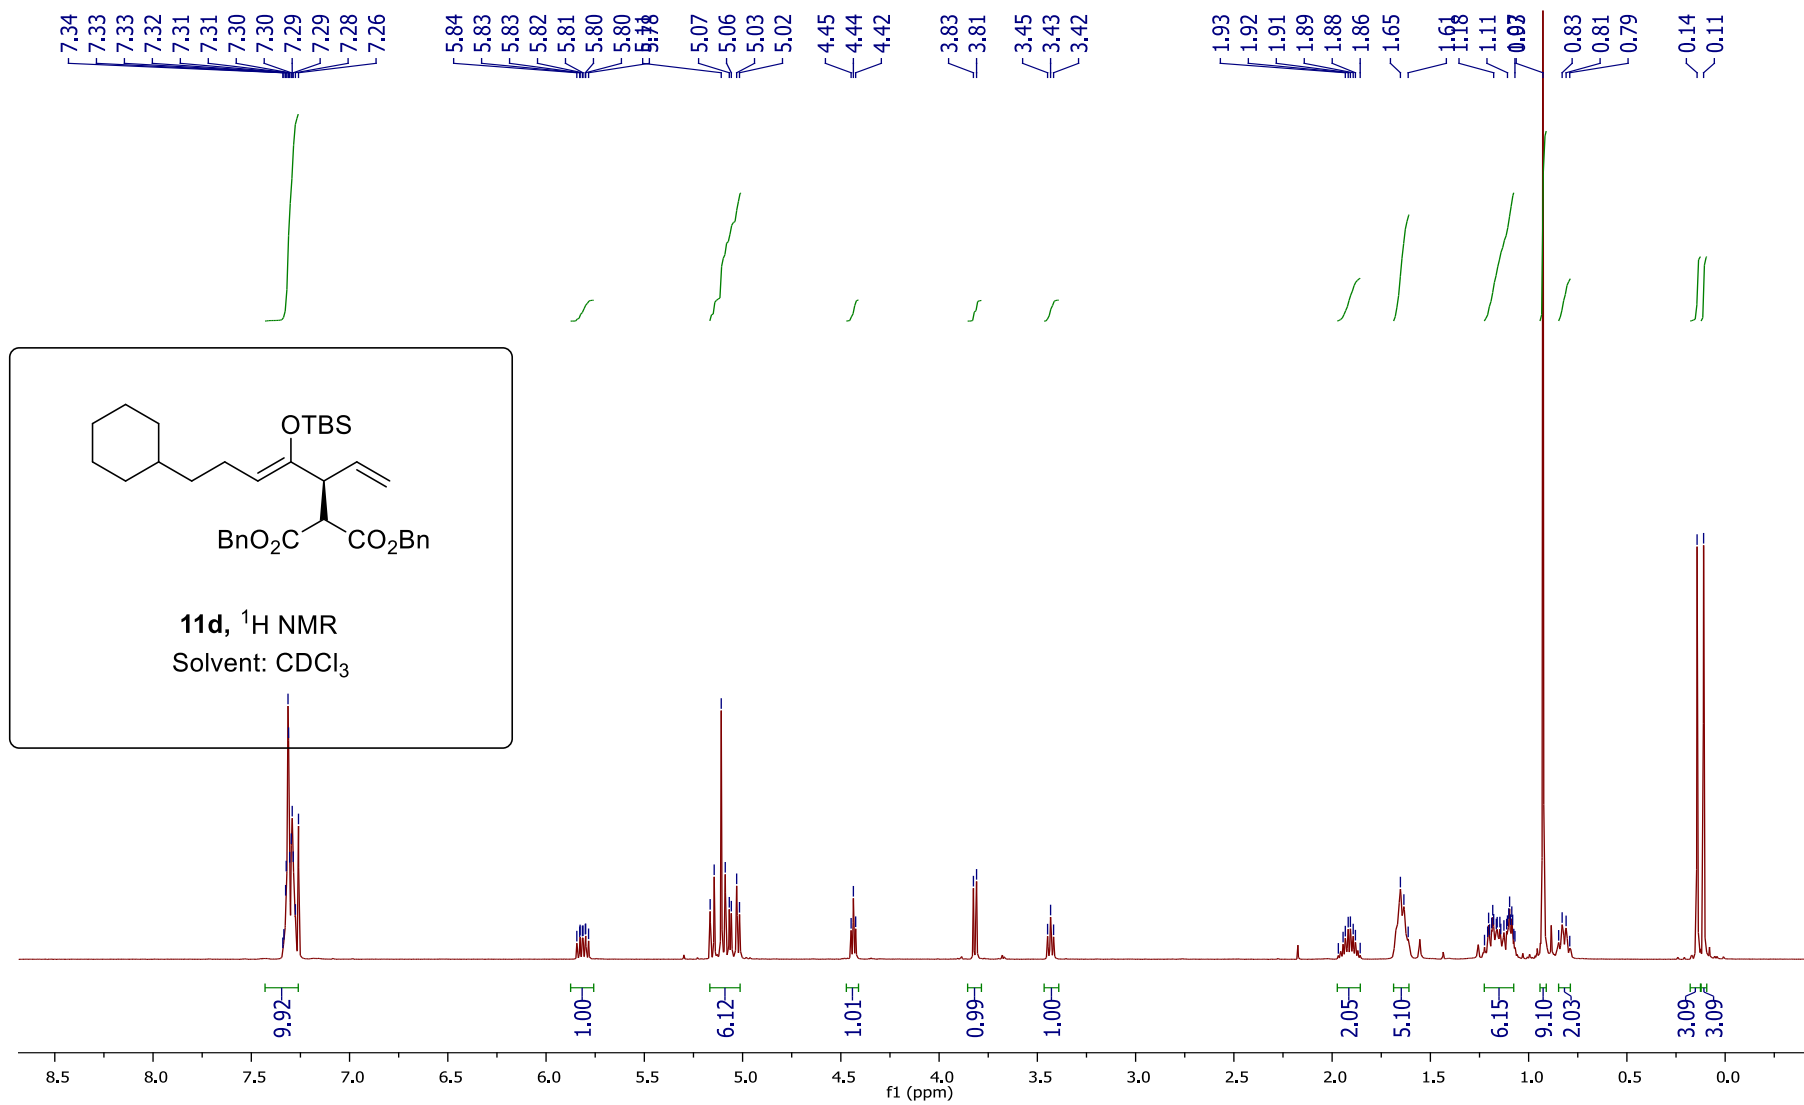

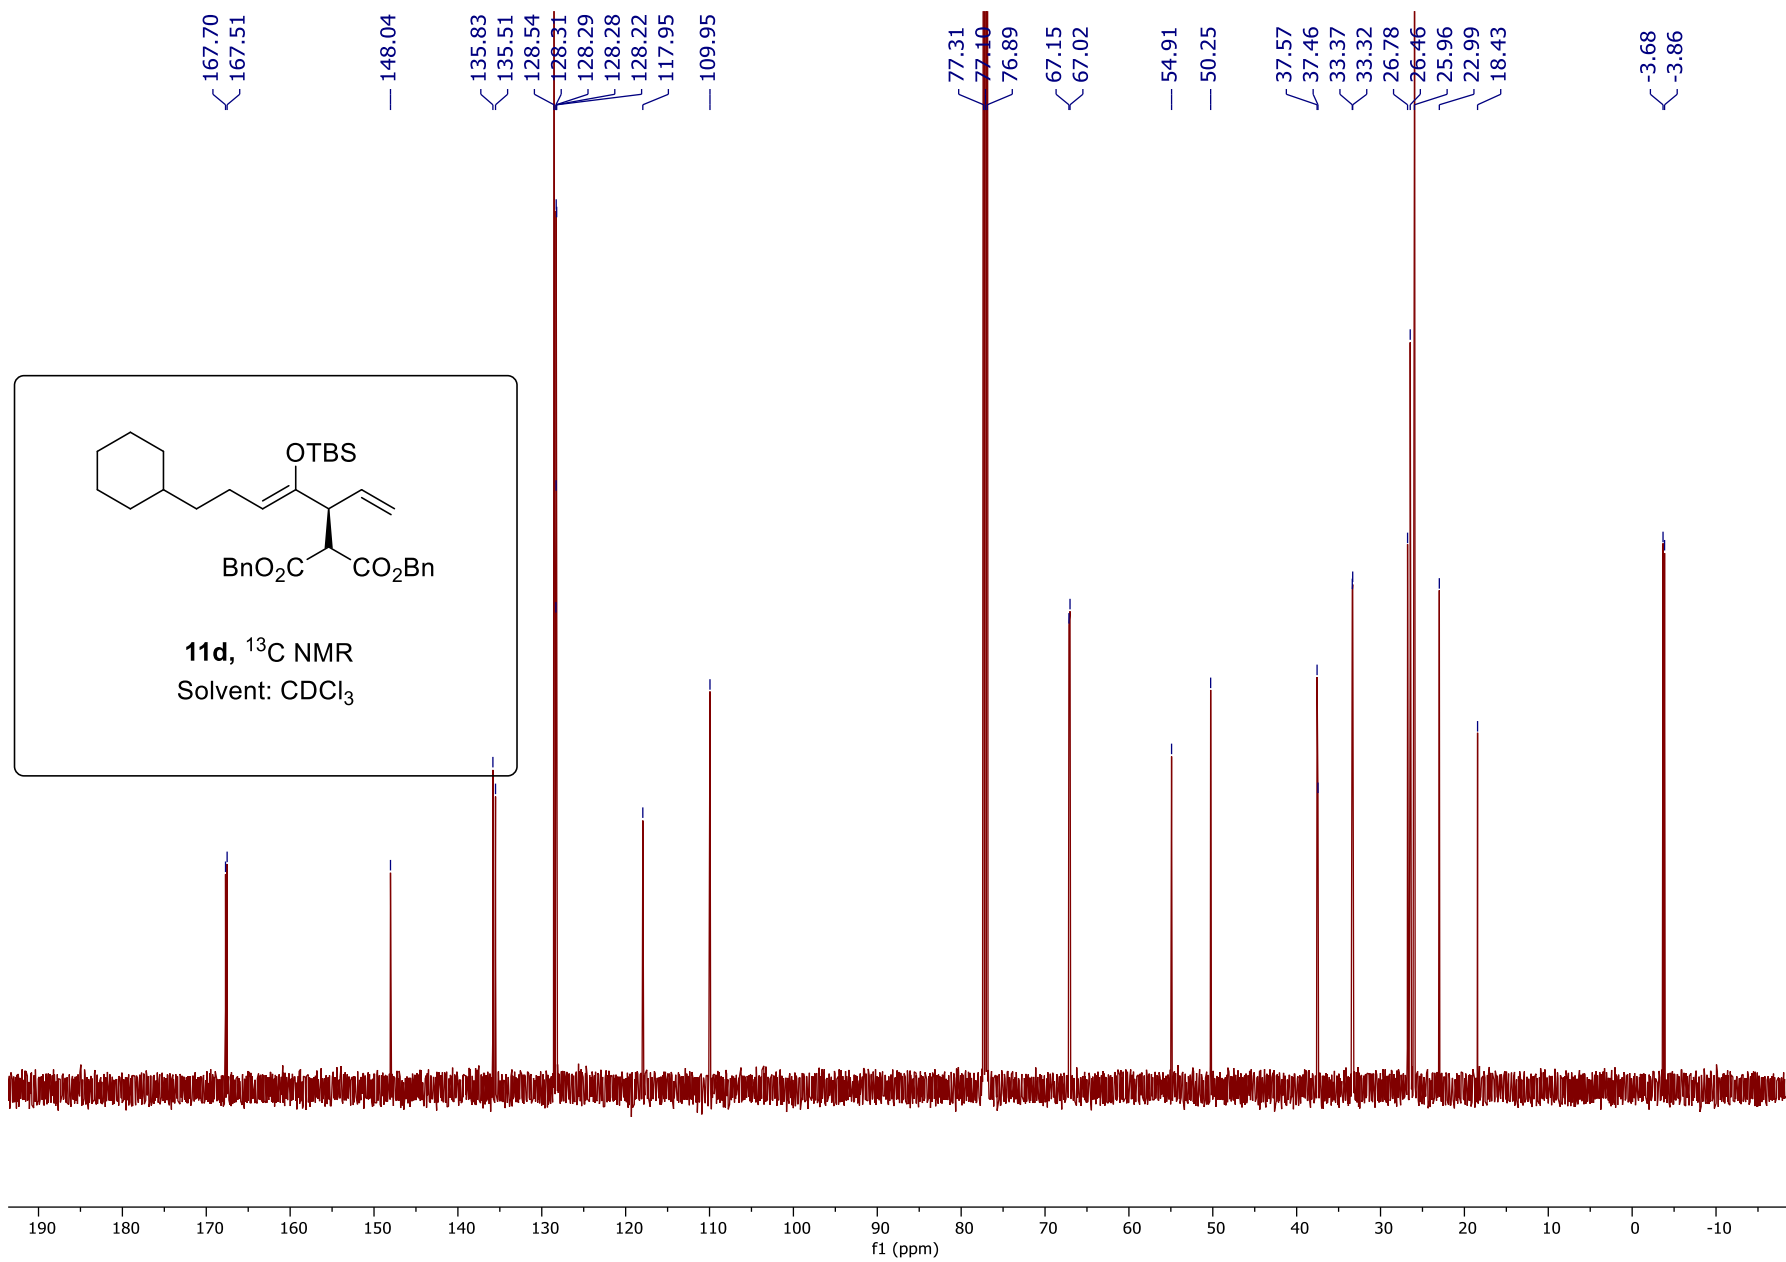

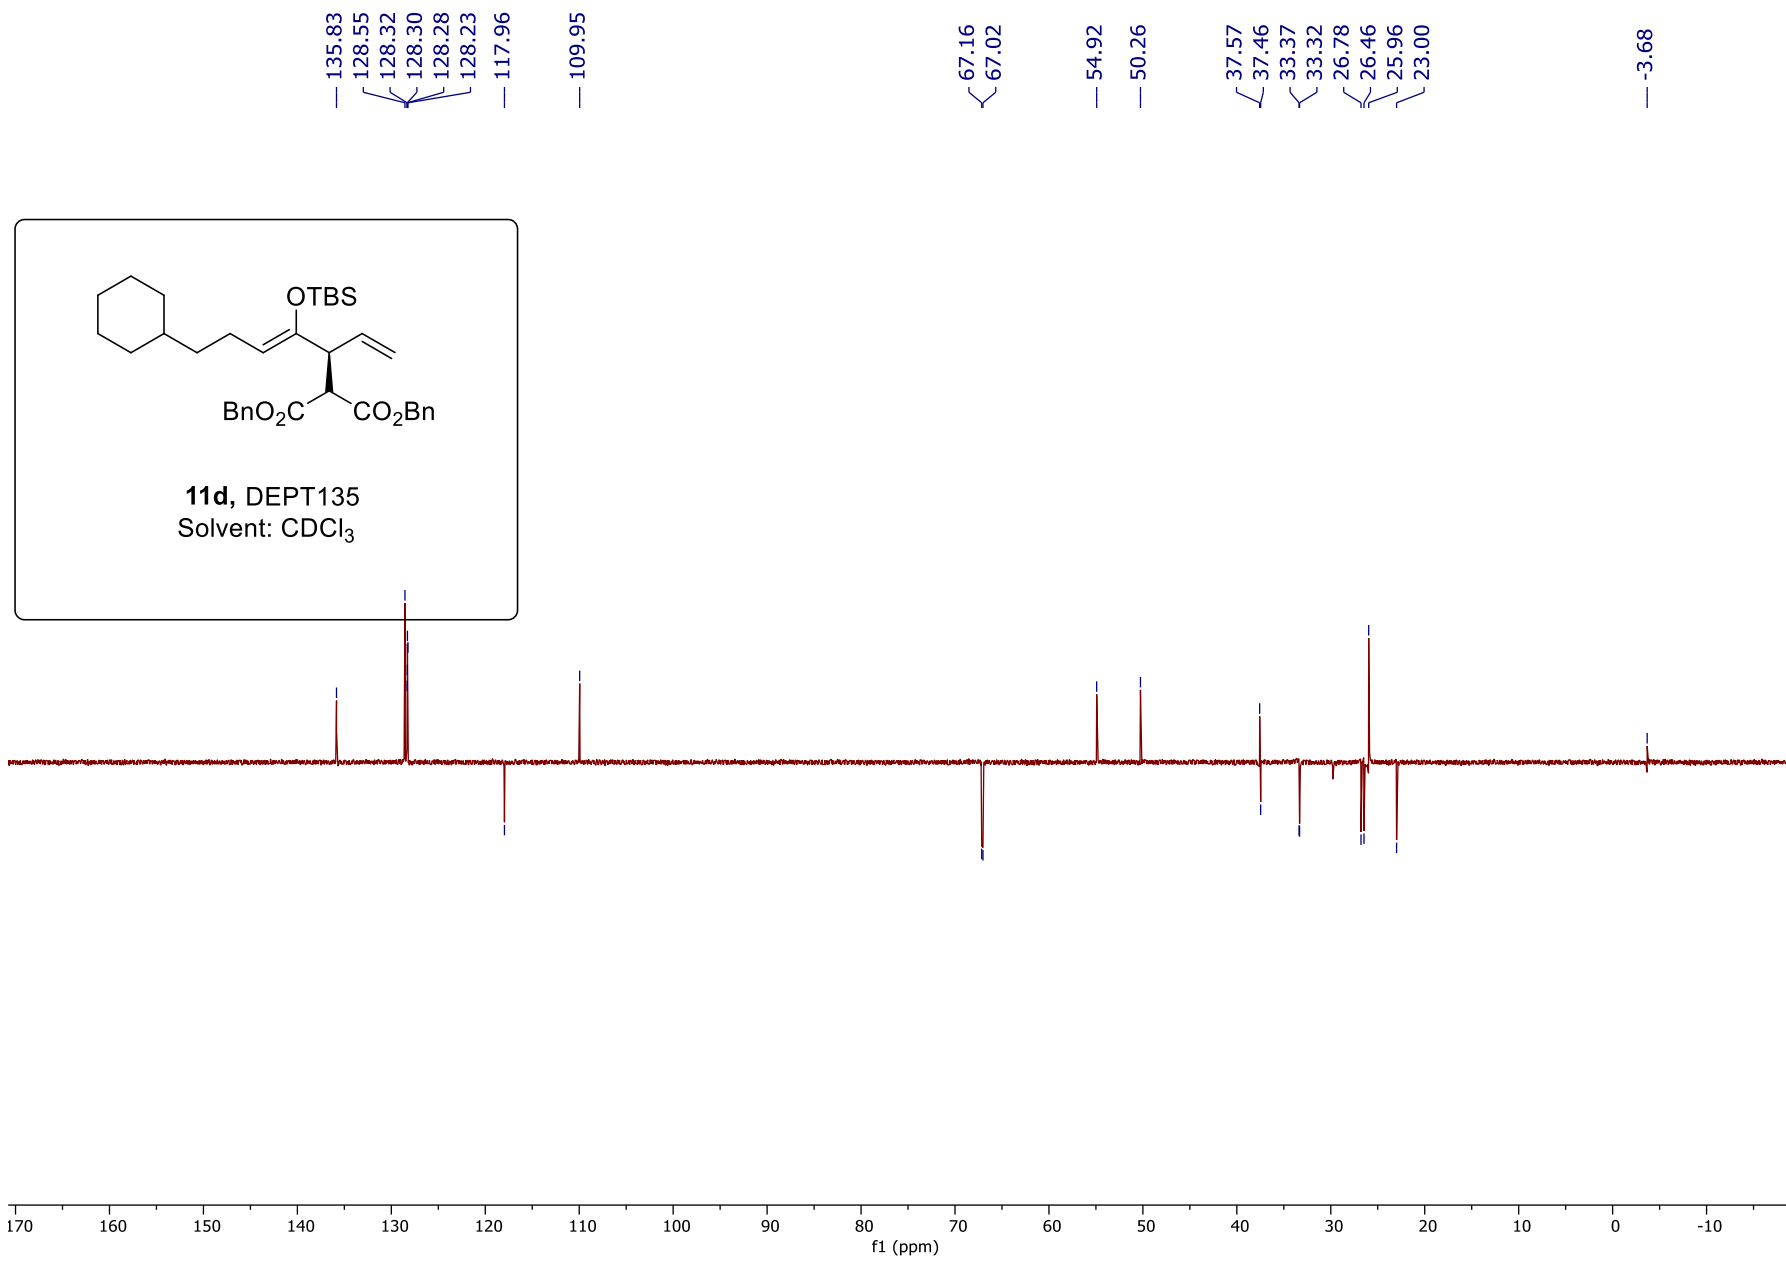

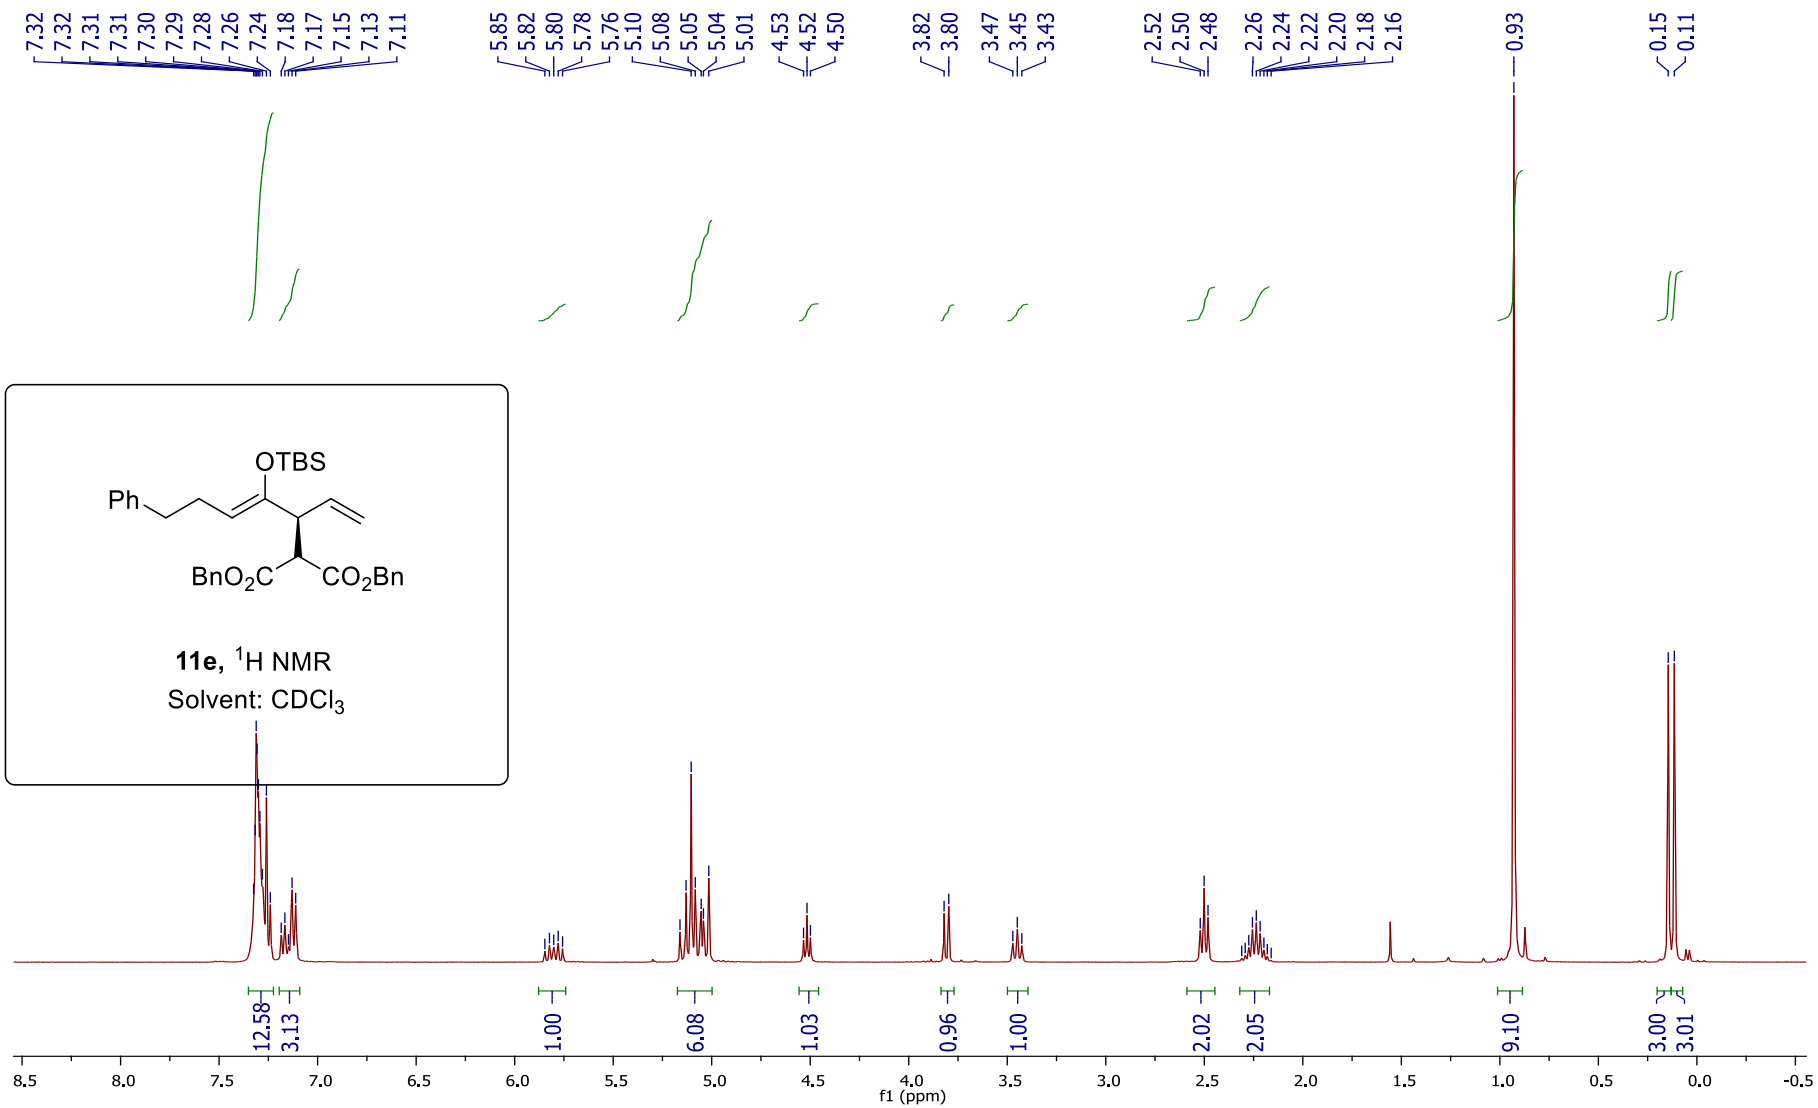

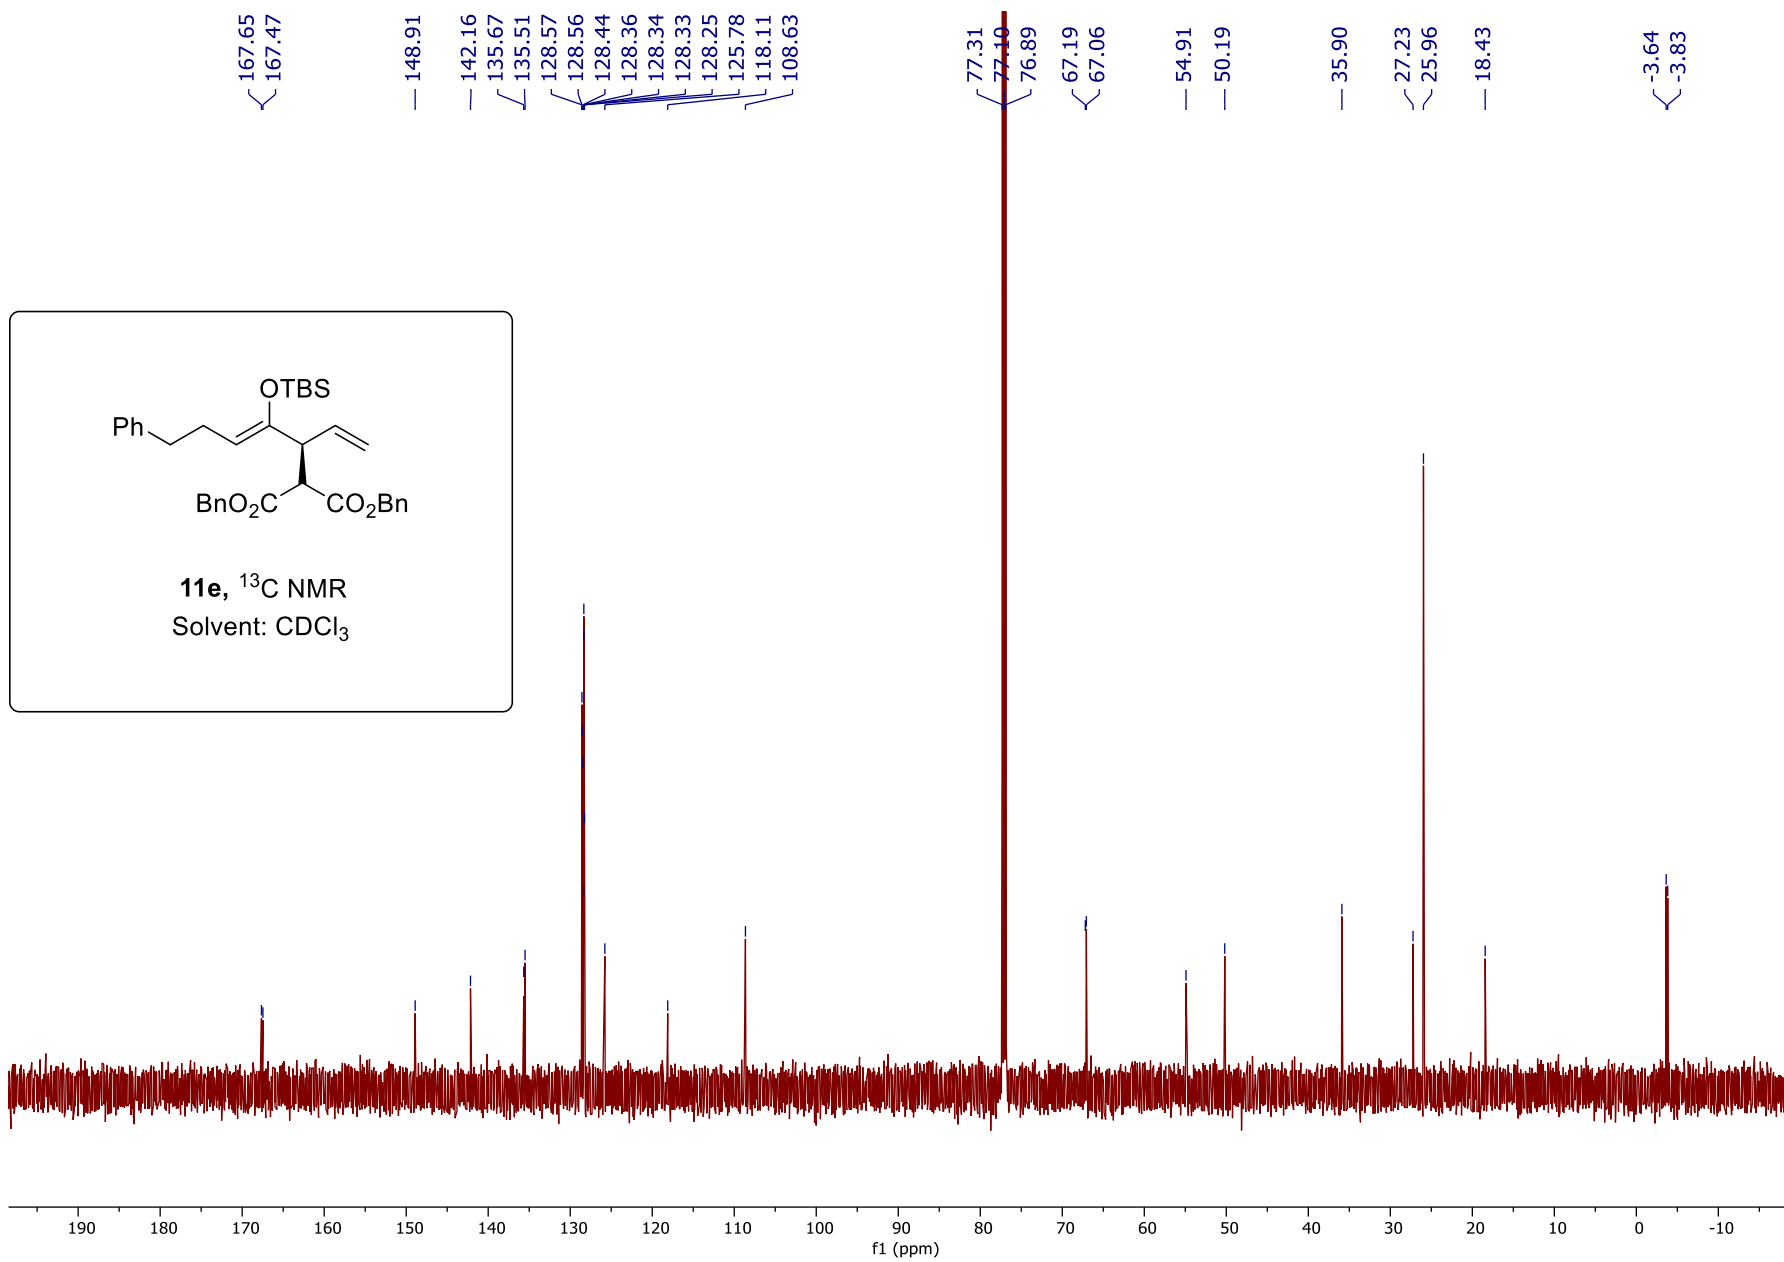

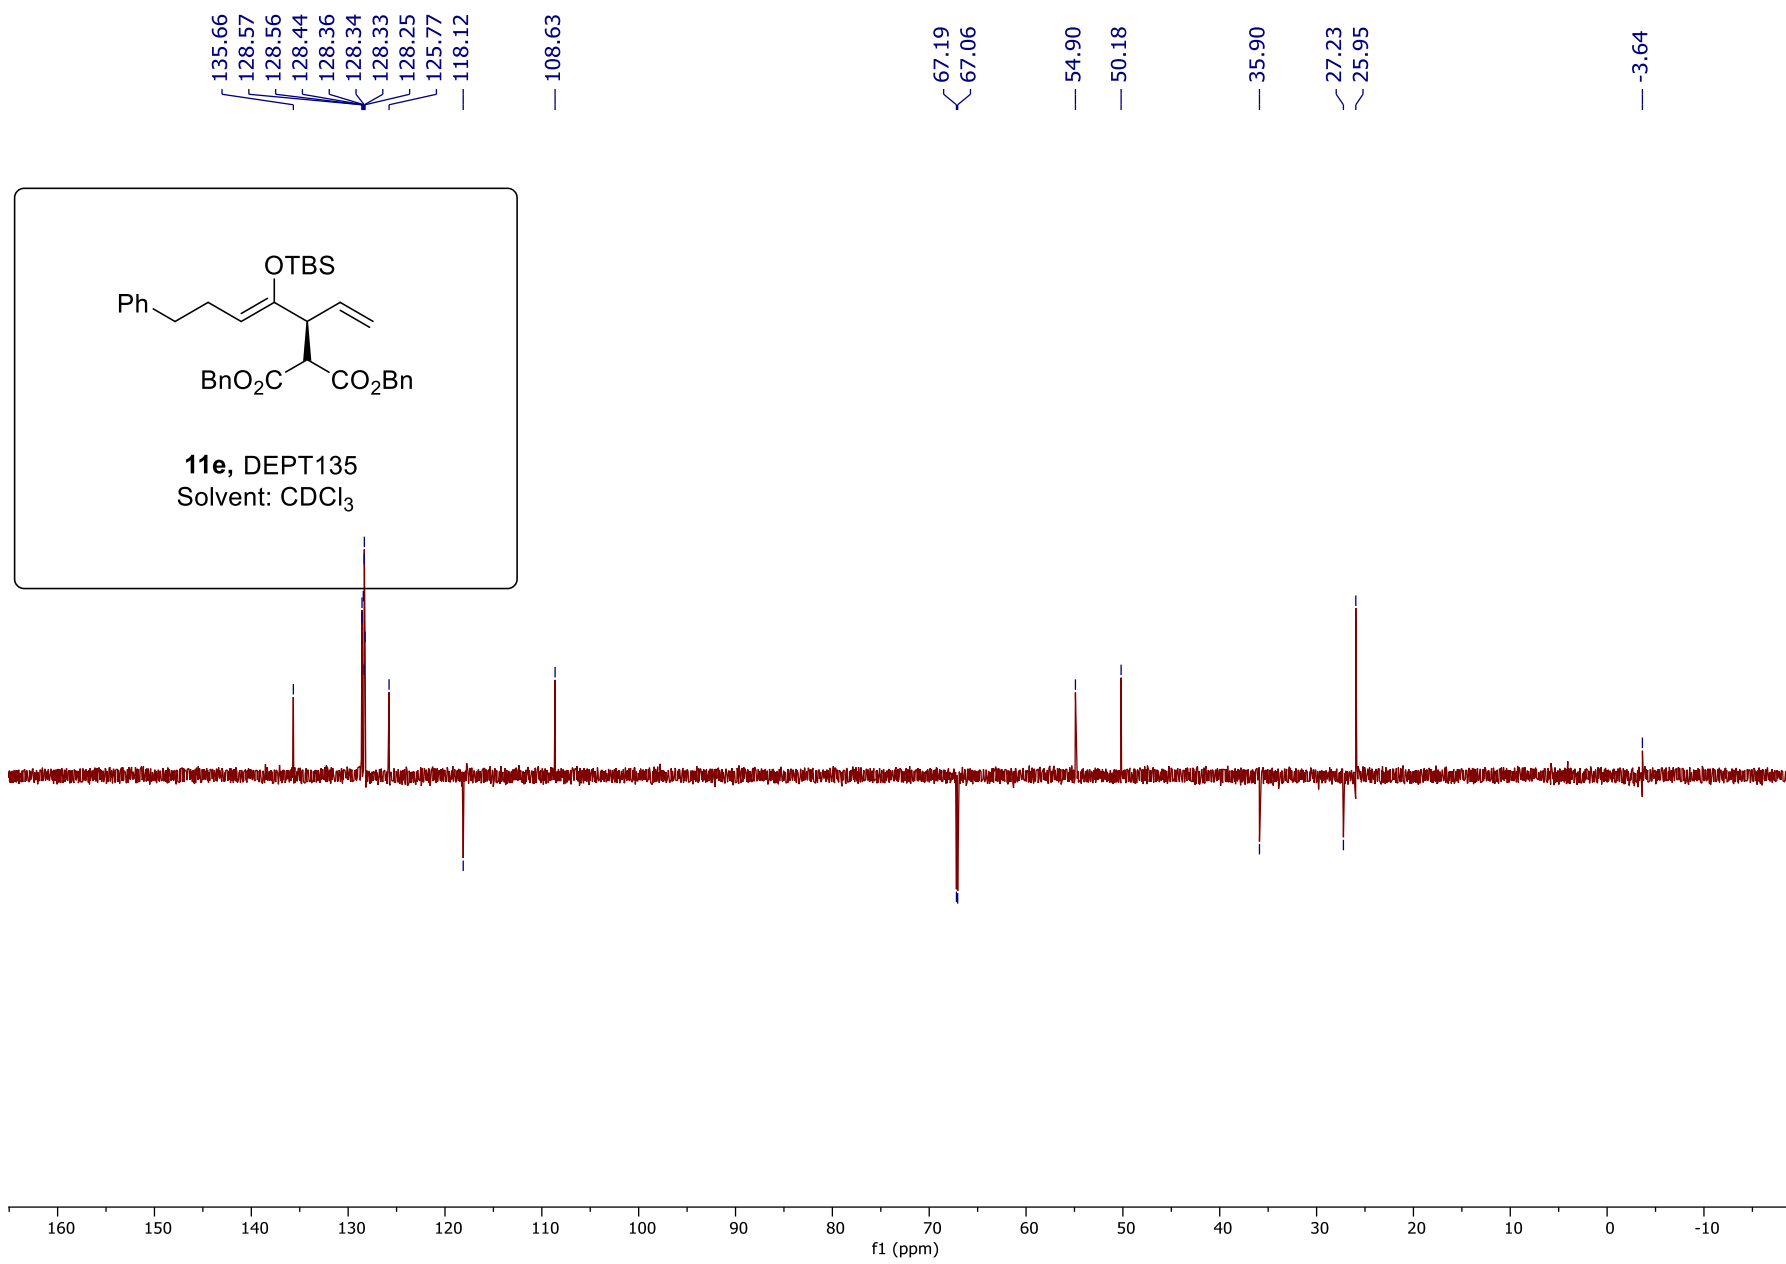

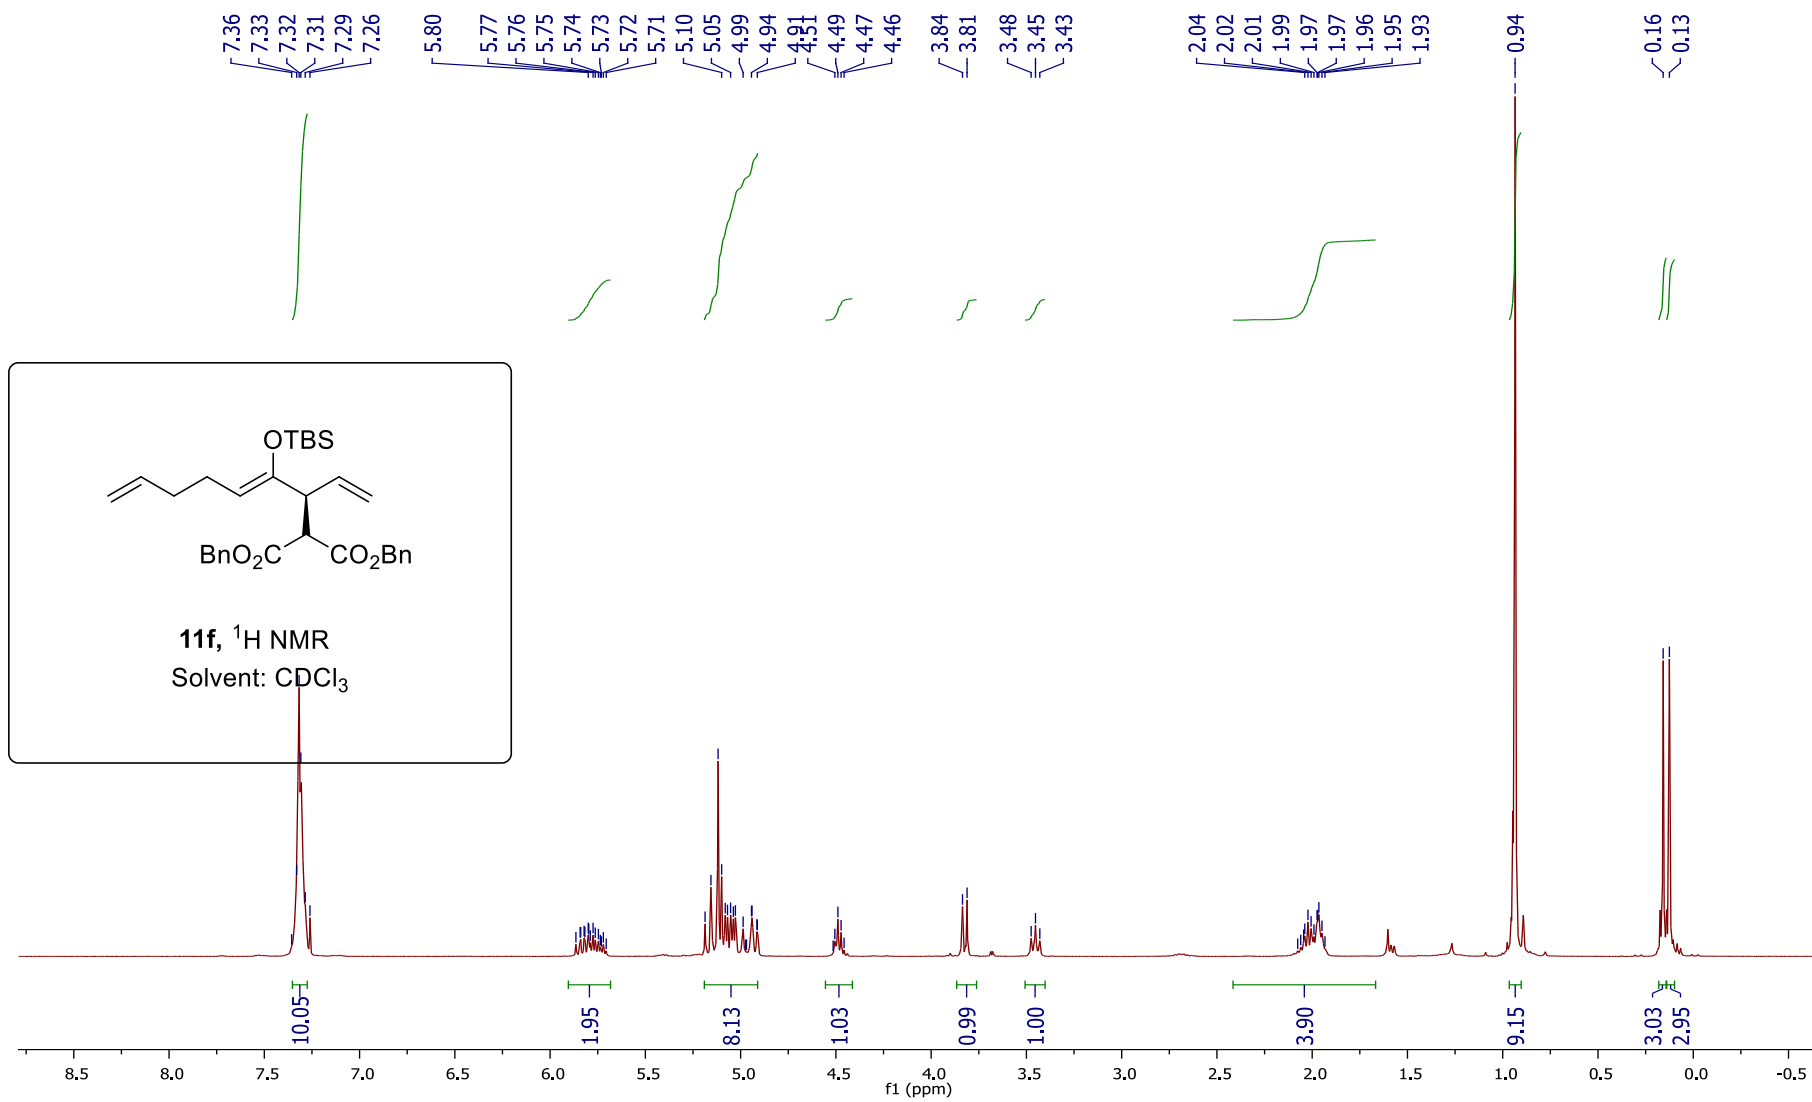



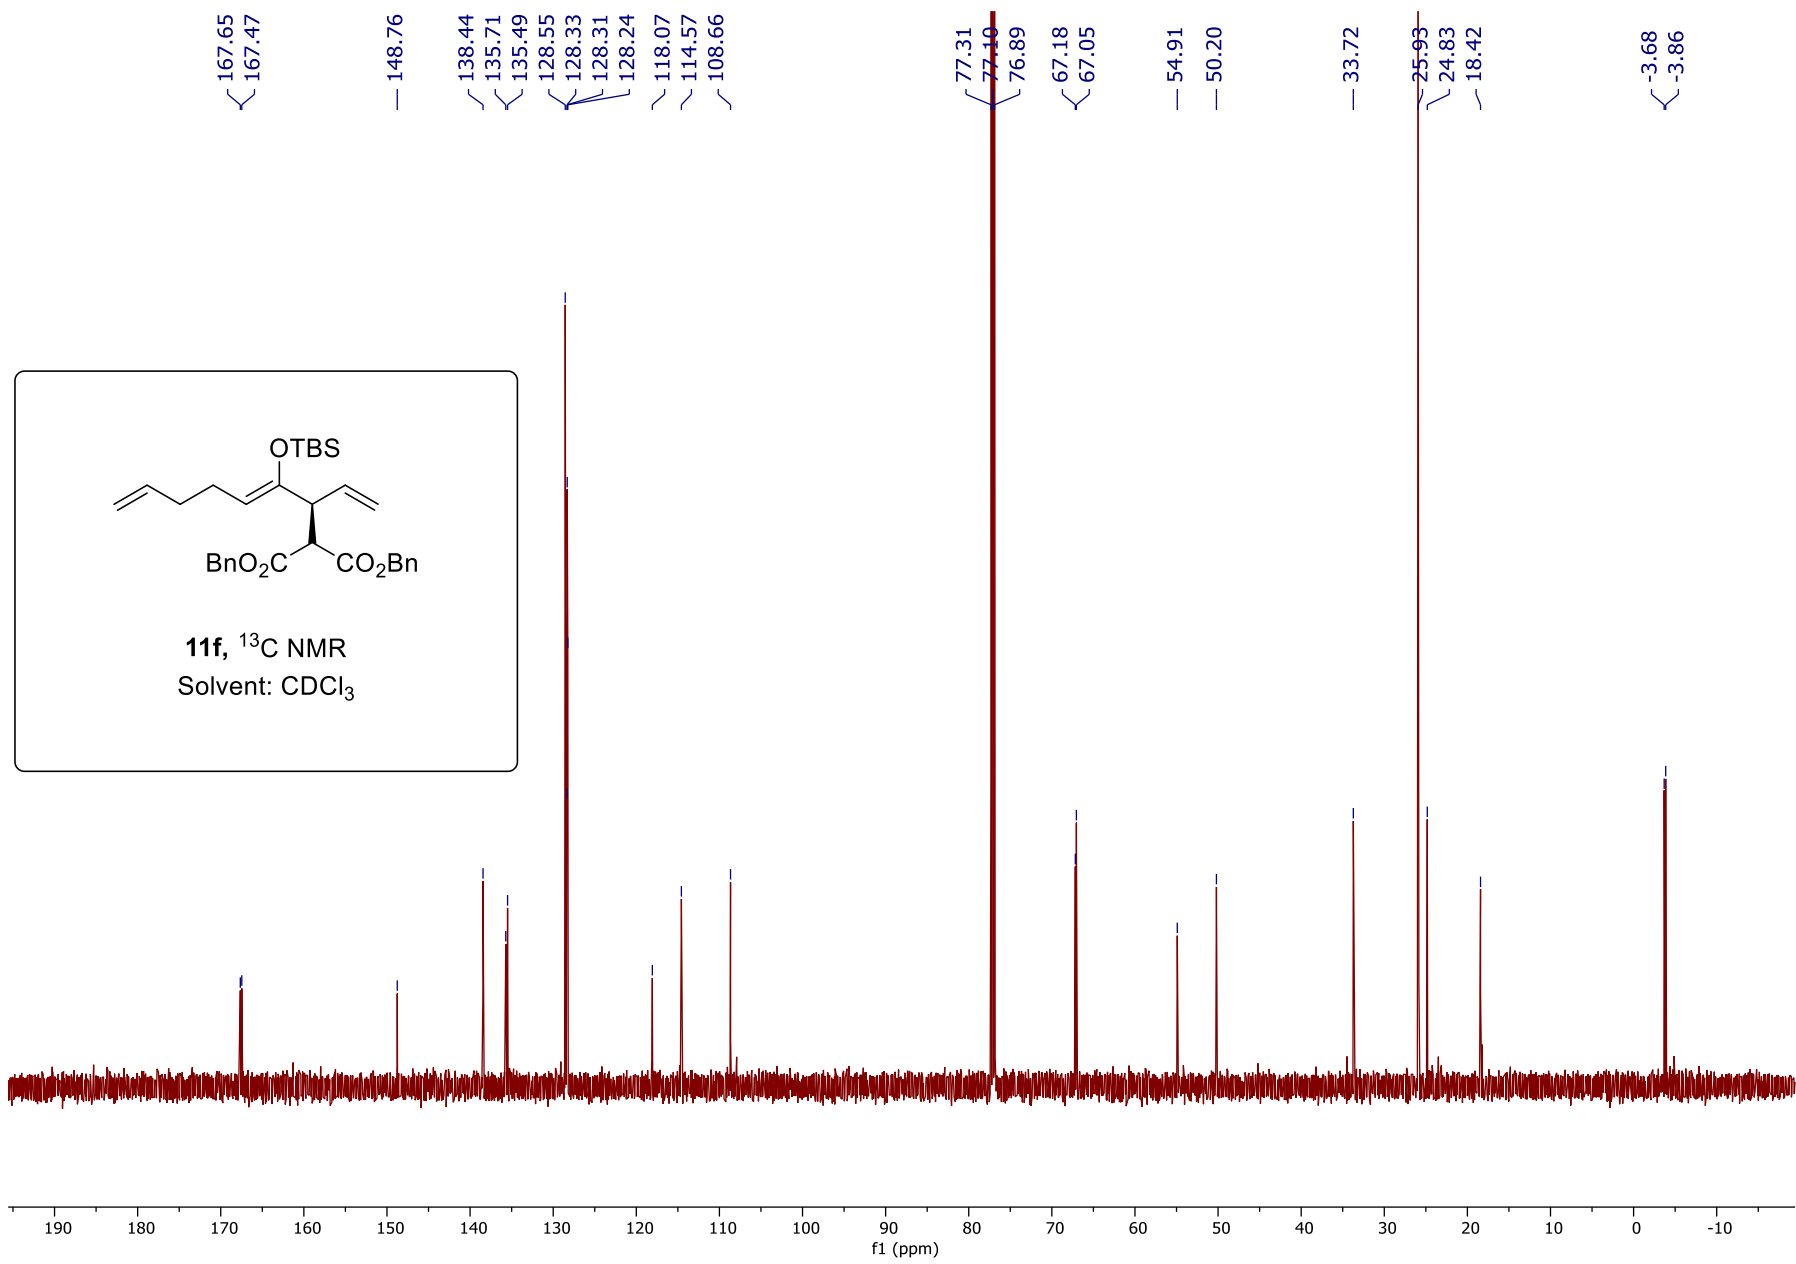

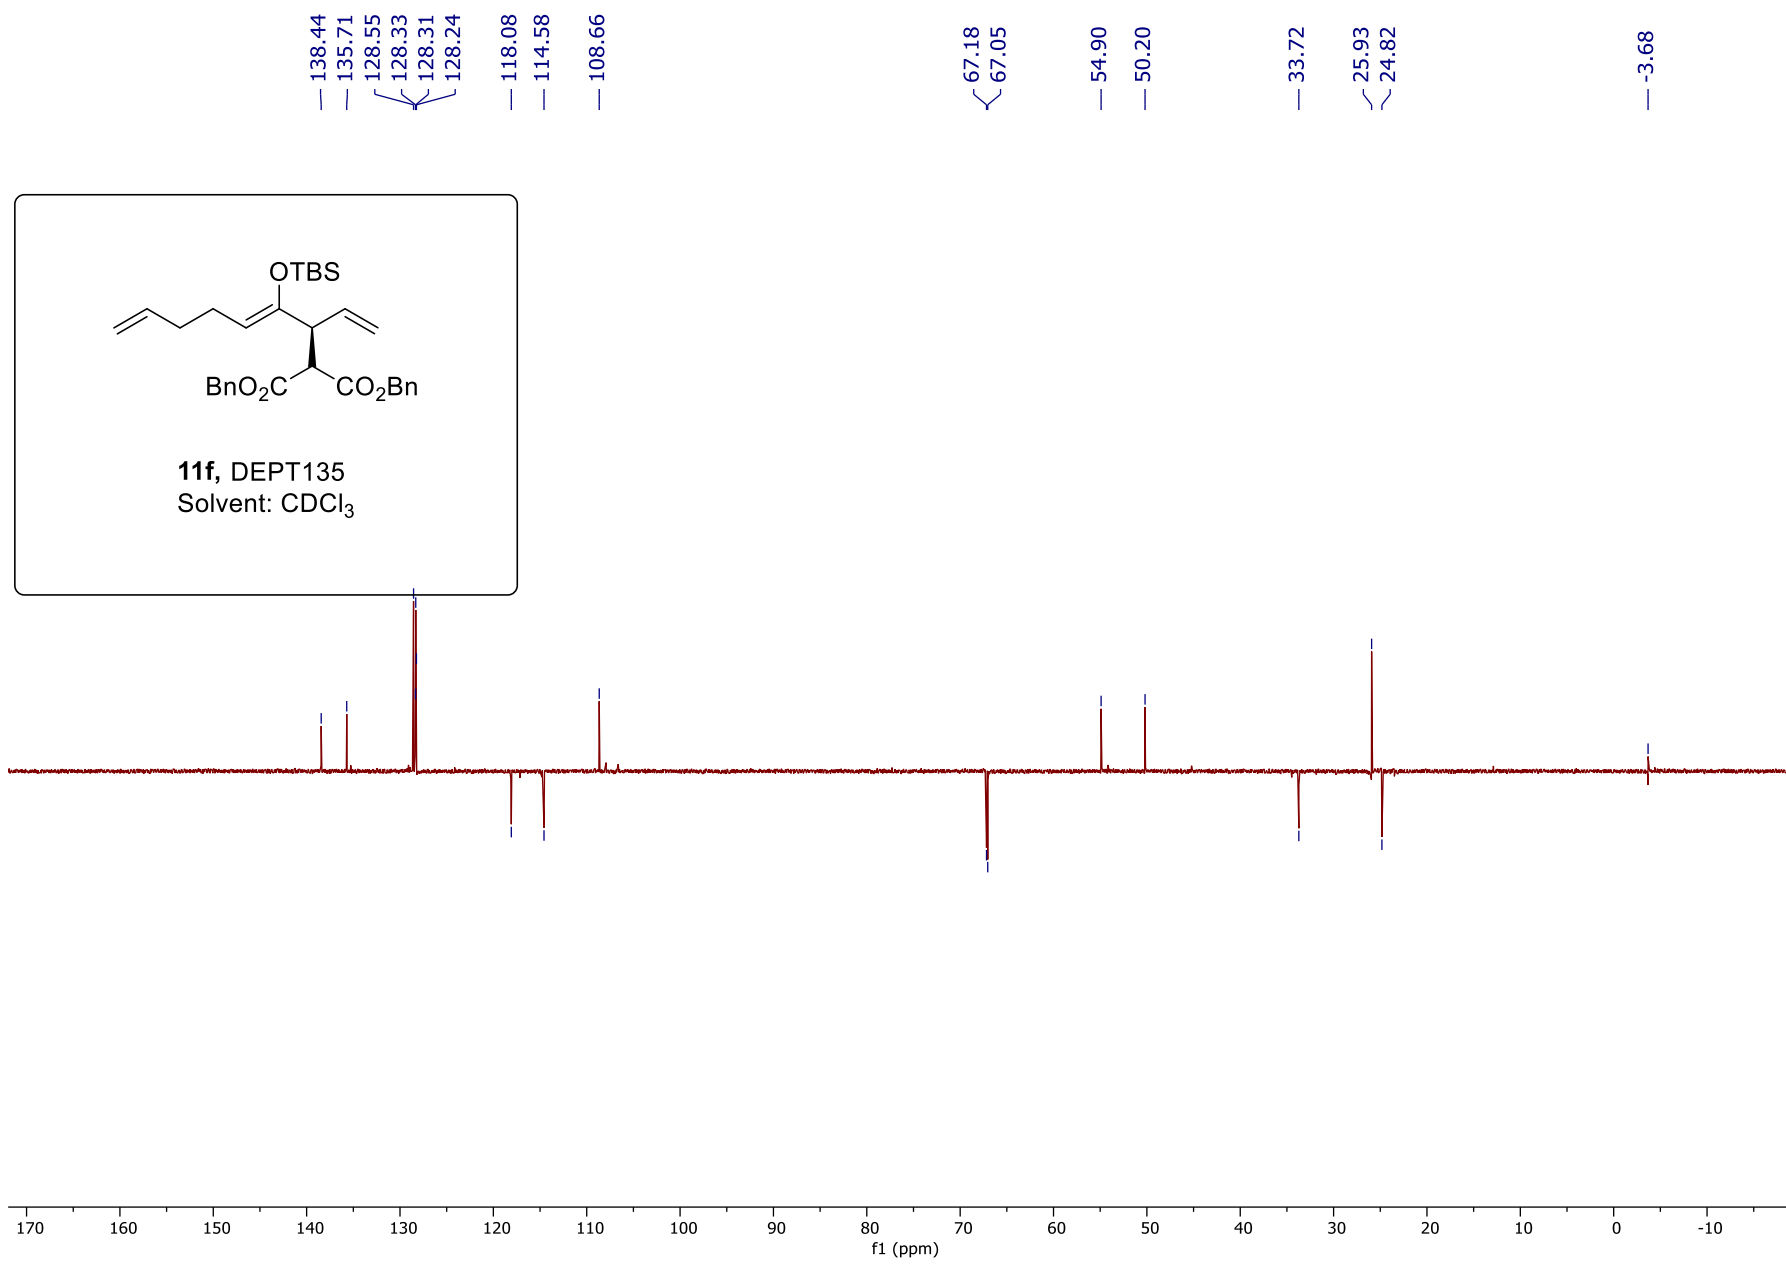

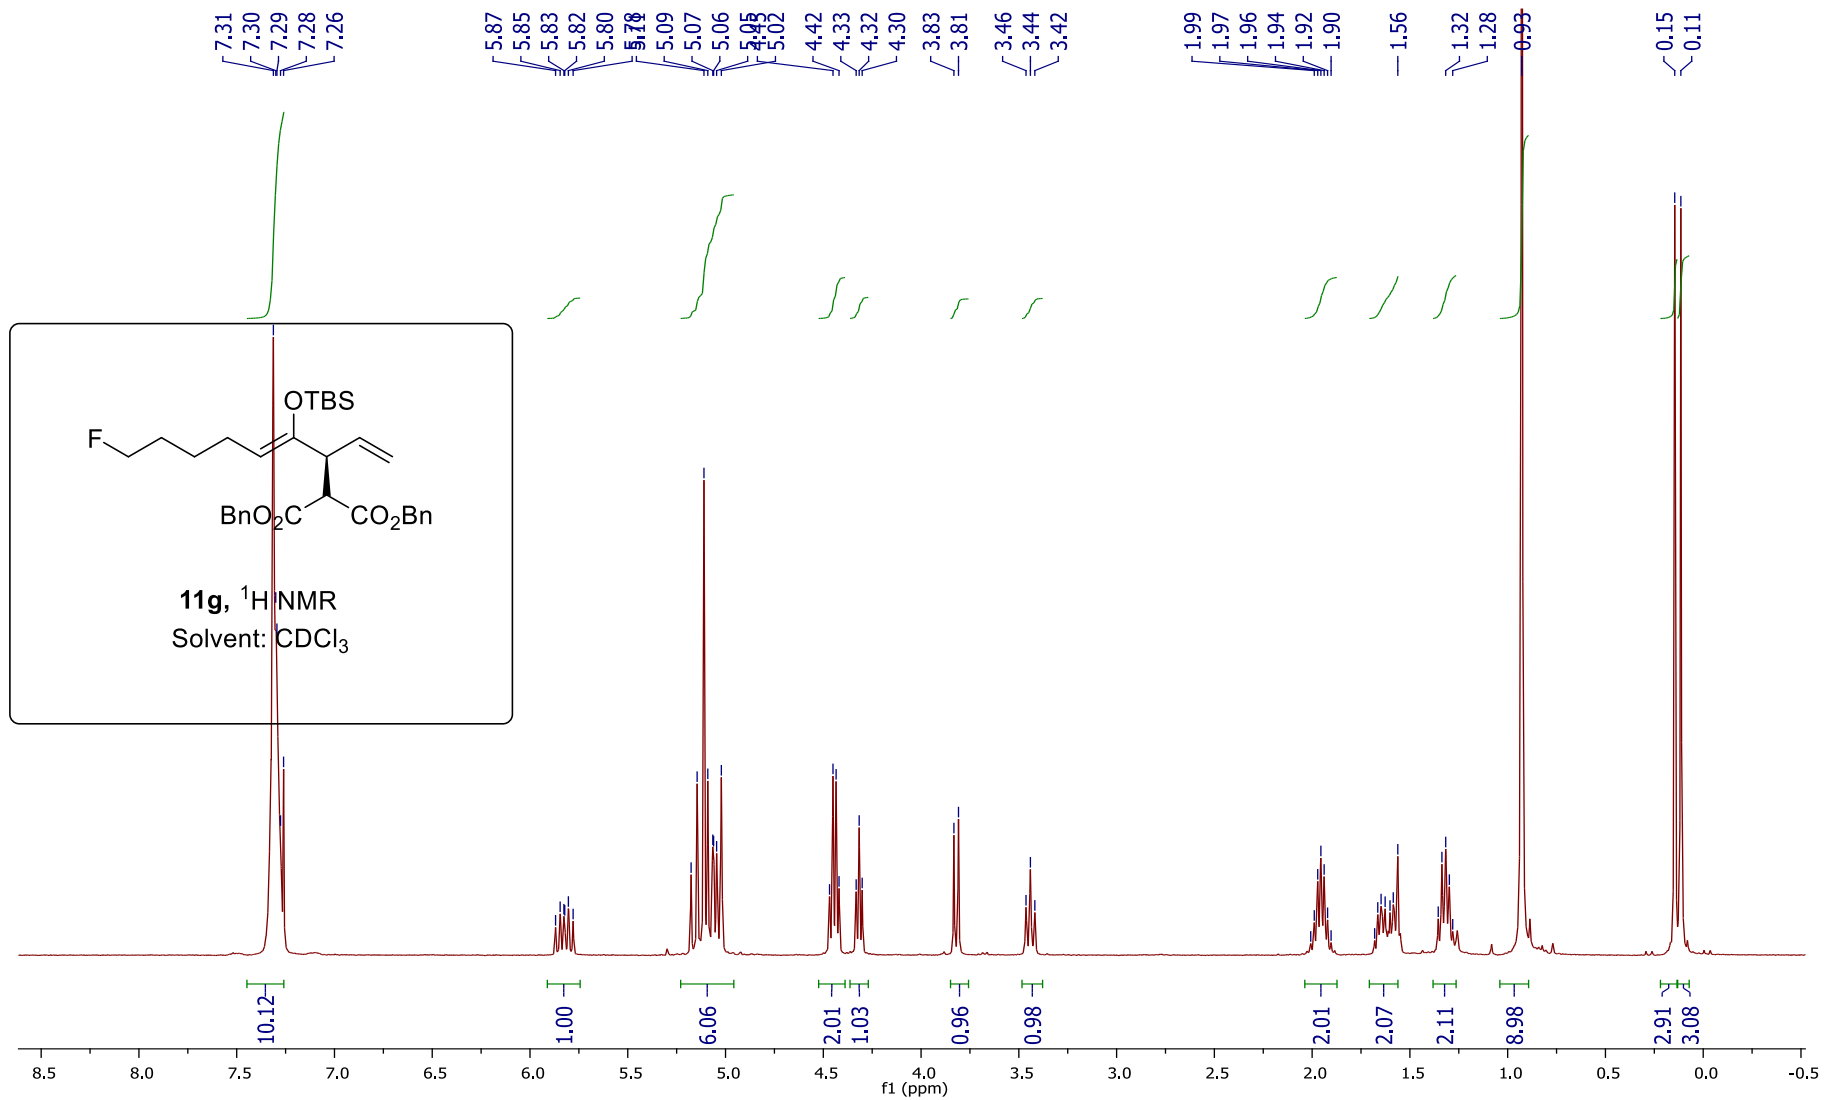

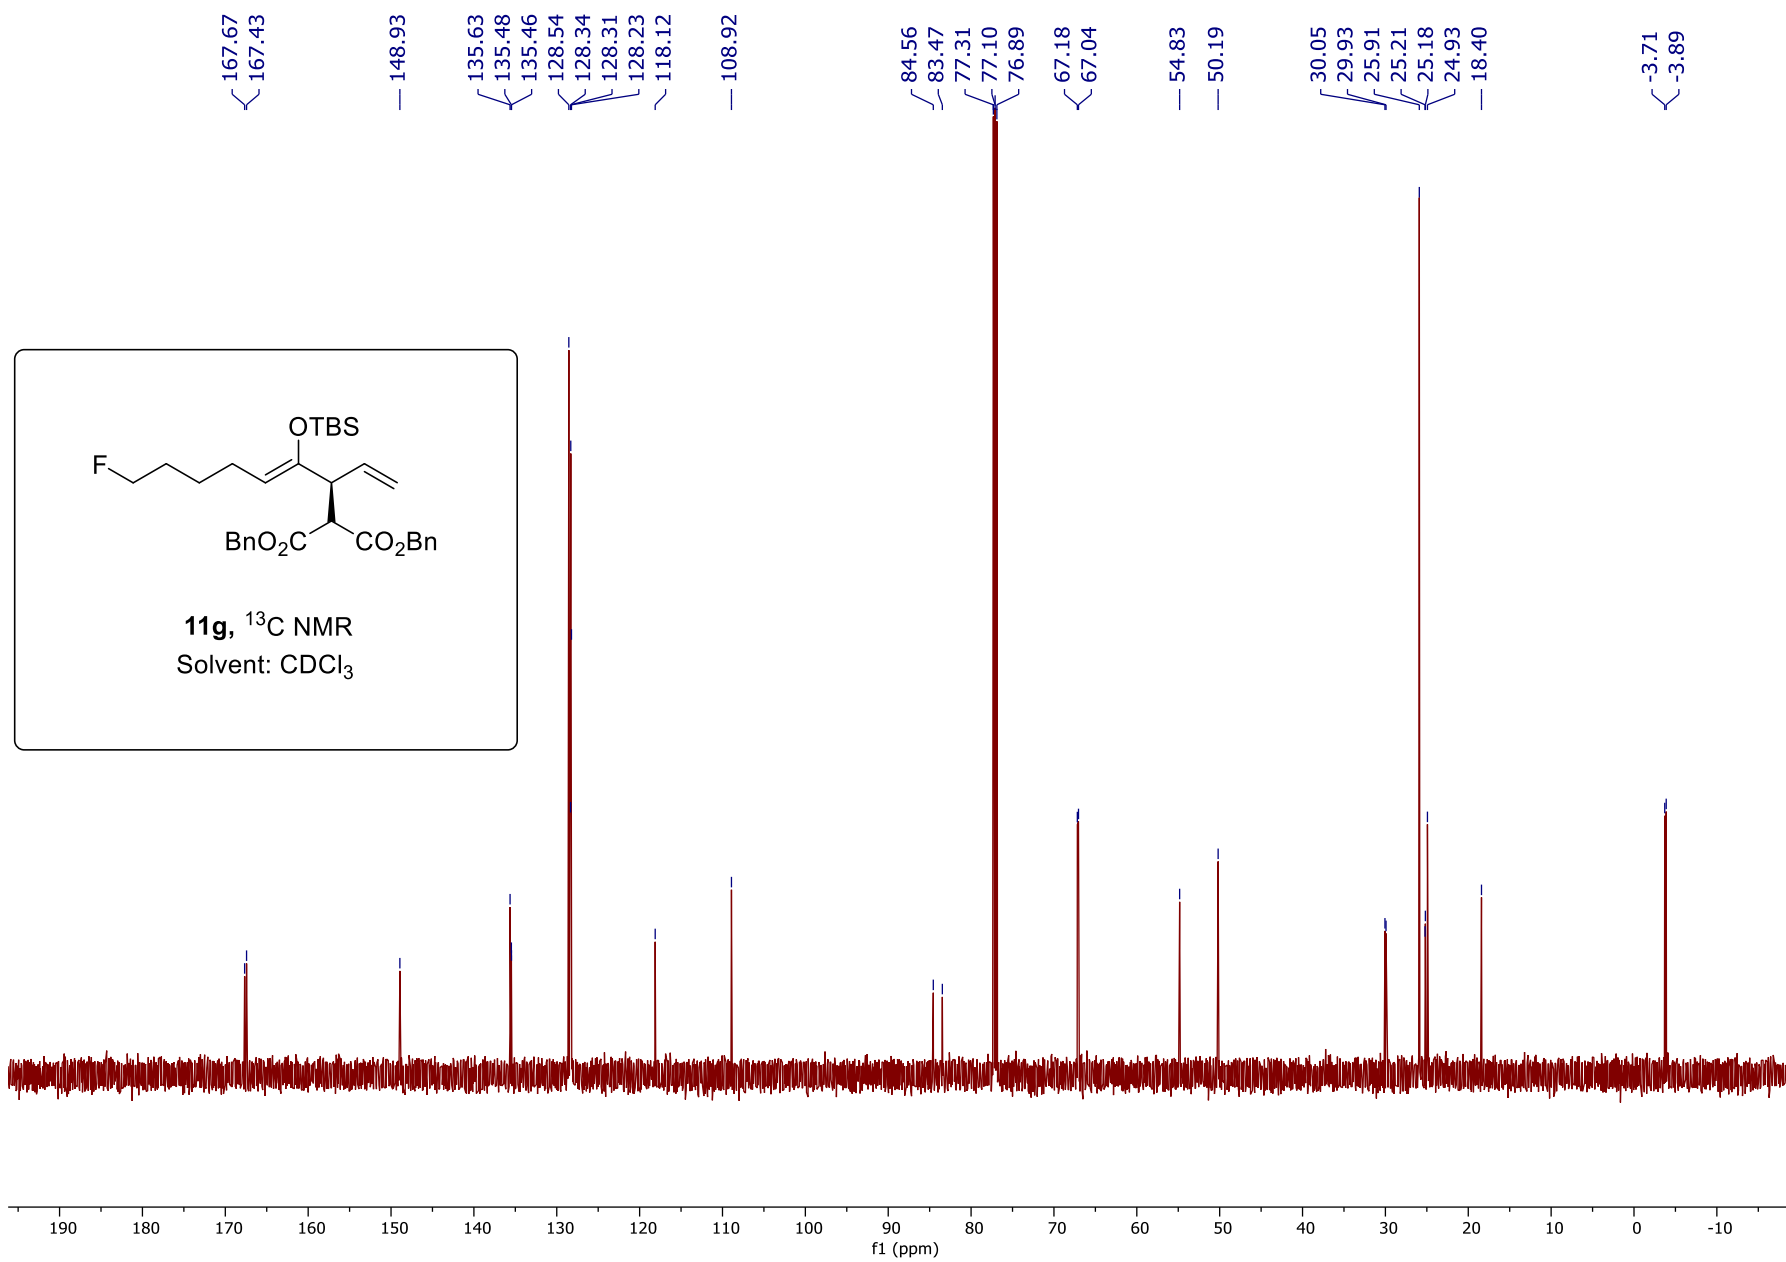

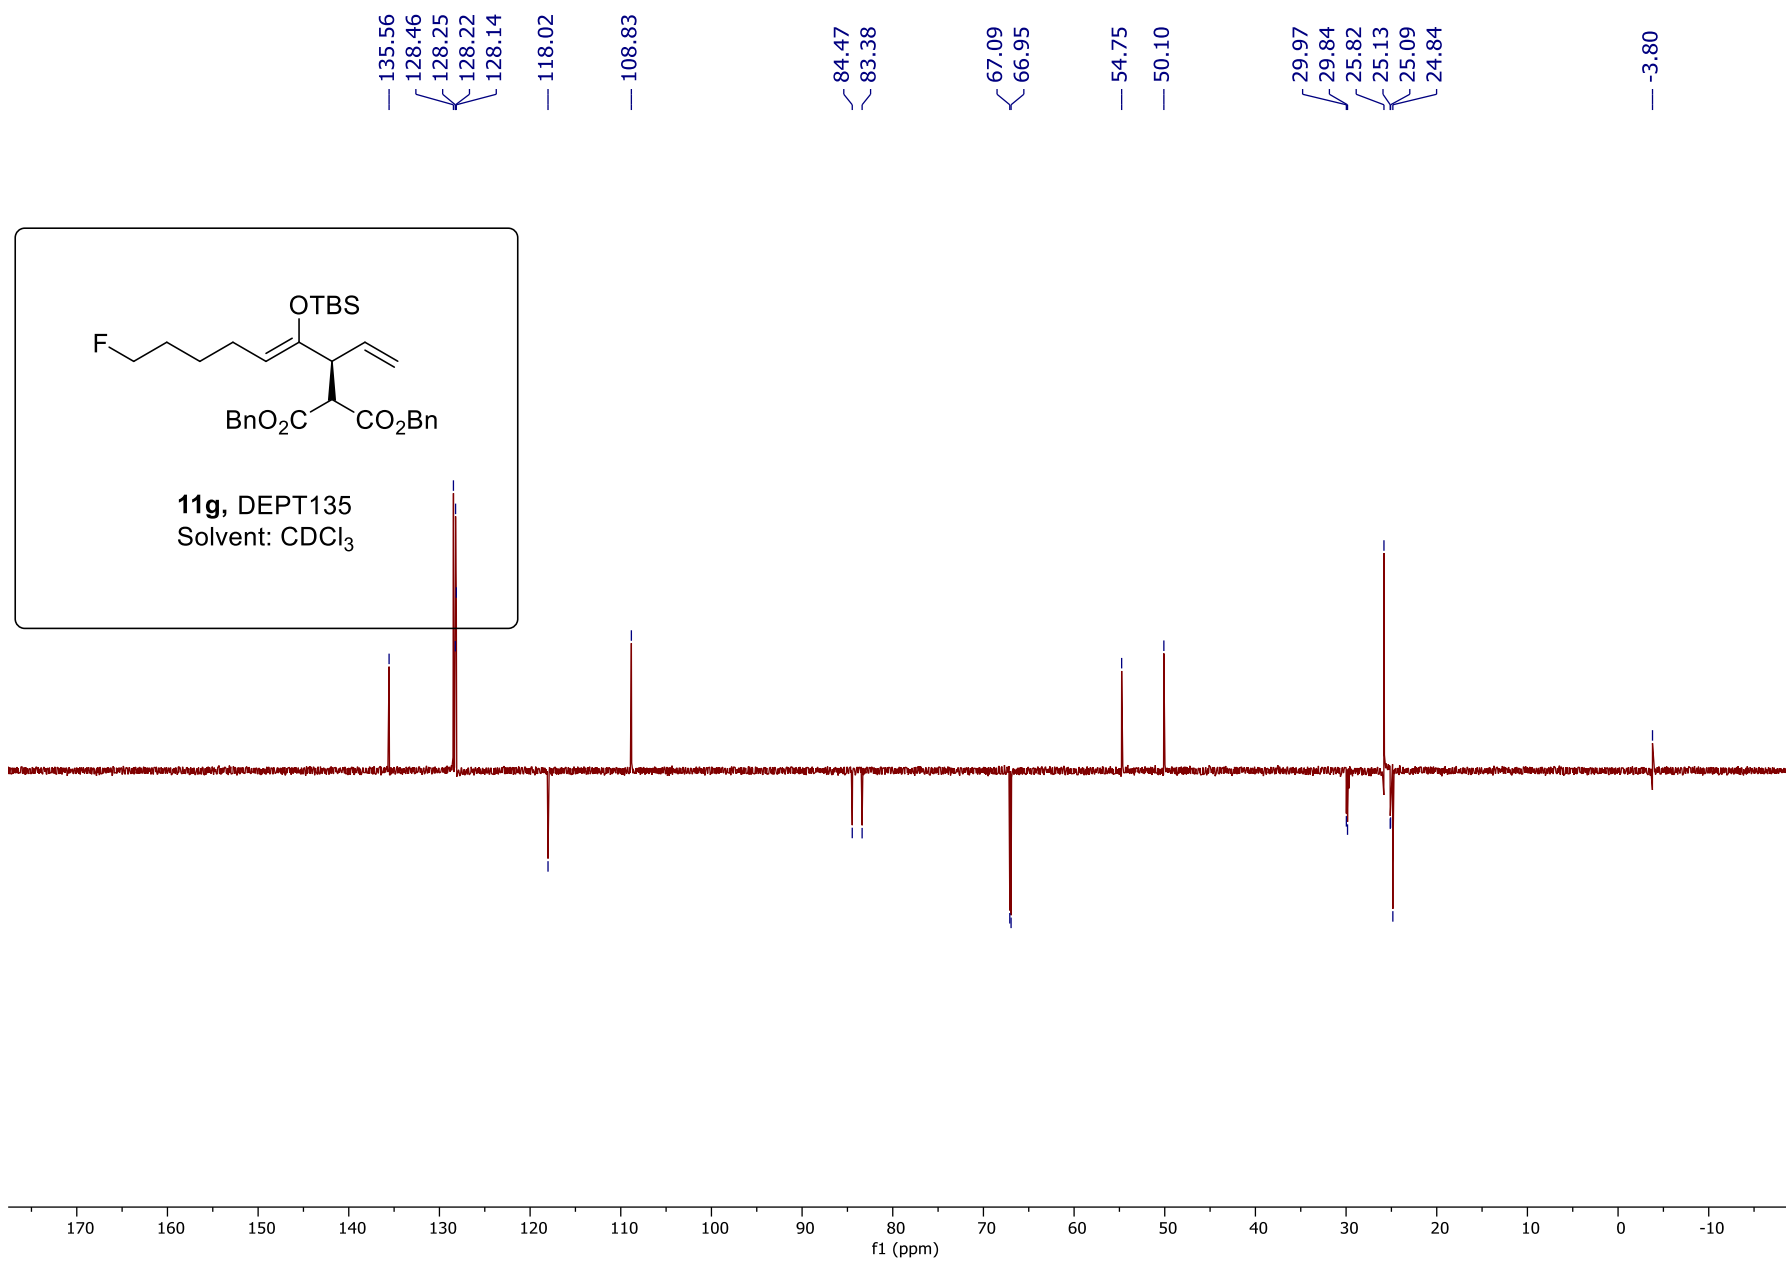

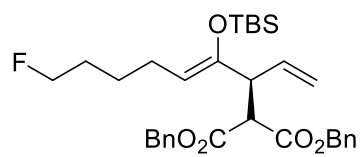

**11g**, <sup>19</sup>F NMR  
Solvent: CDCl<sub>3</sub>

-217.05  
-217.11  
-217.17  
-217.24  
-217.30  
-217.36  
-217.43

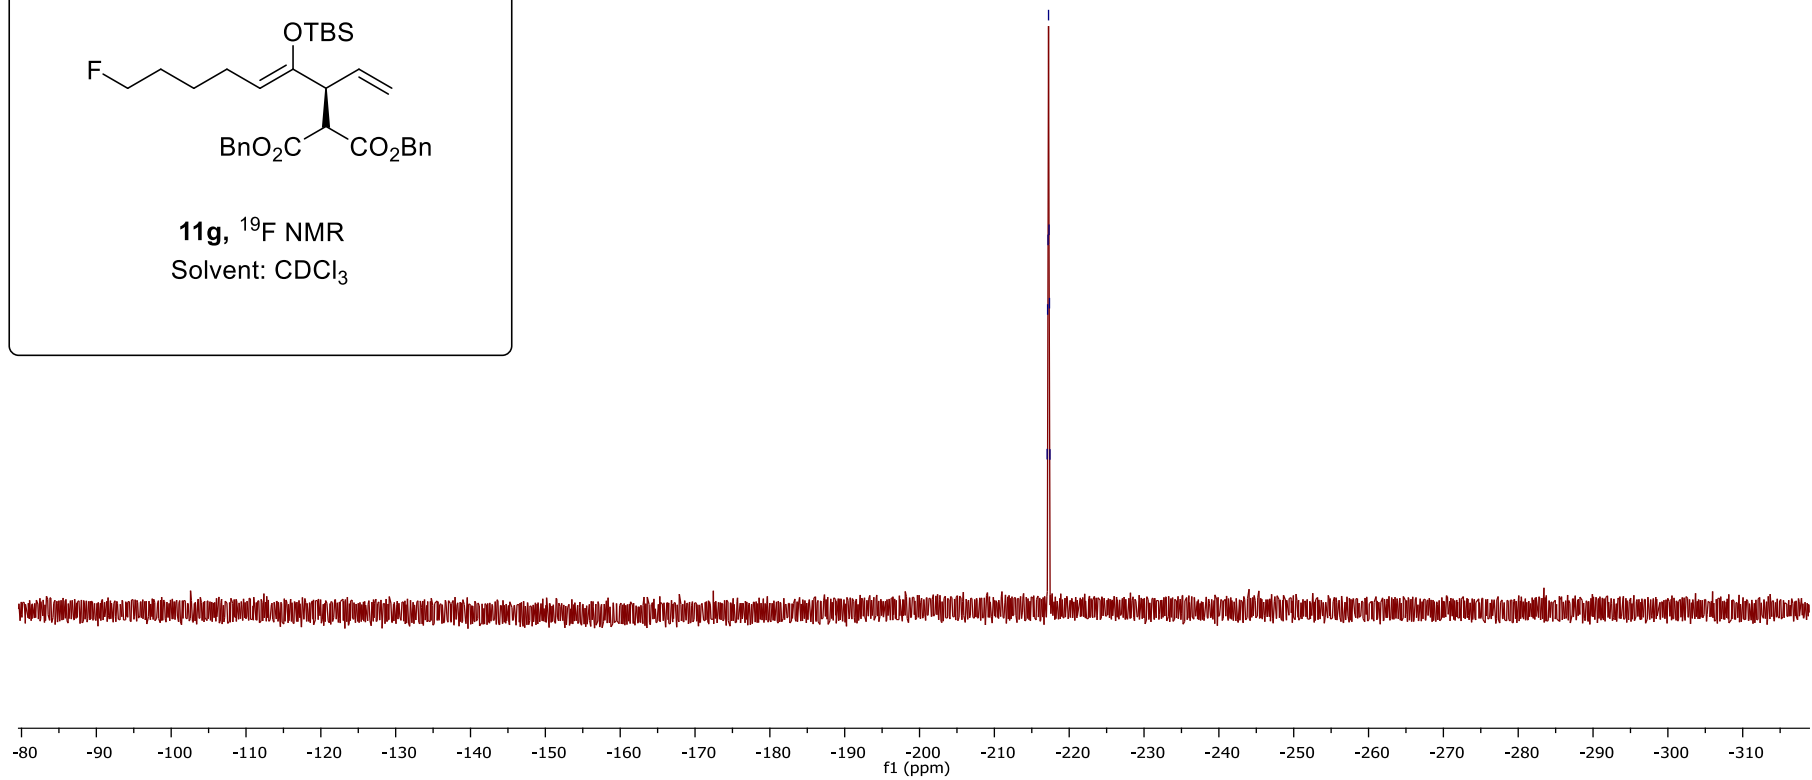

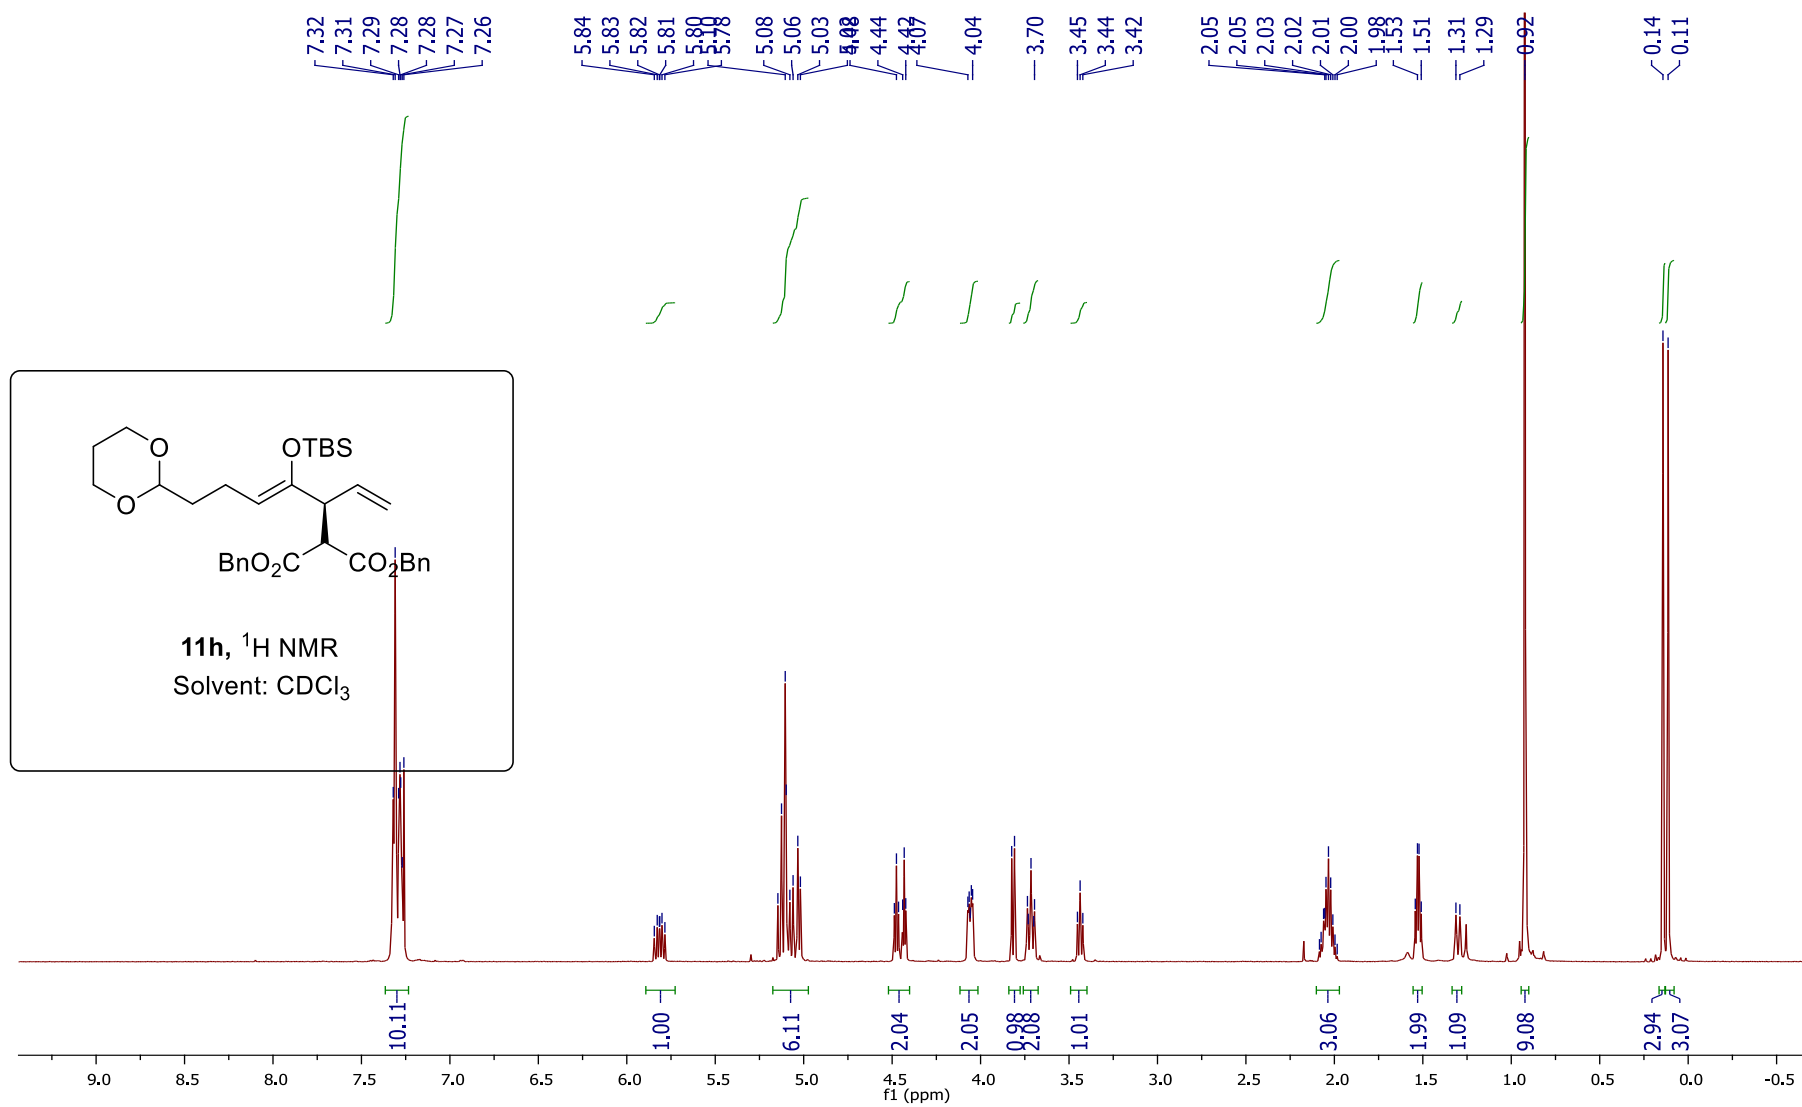

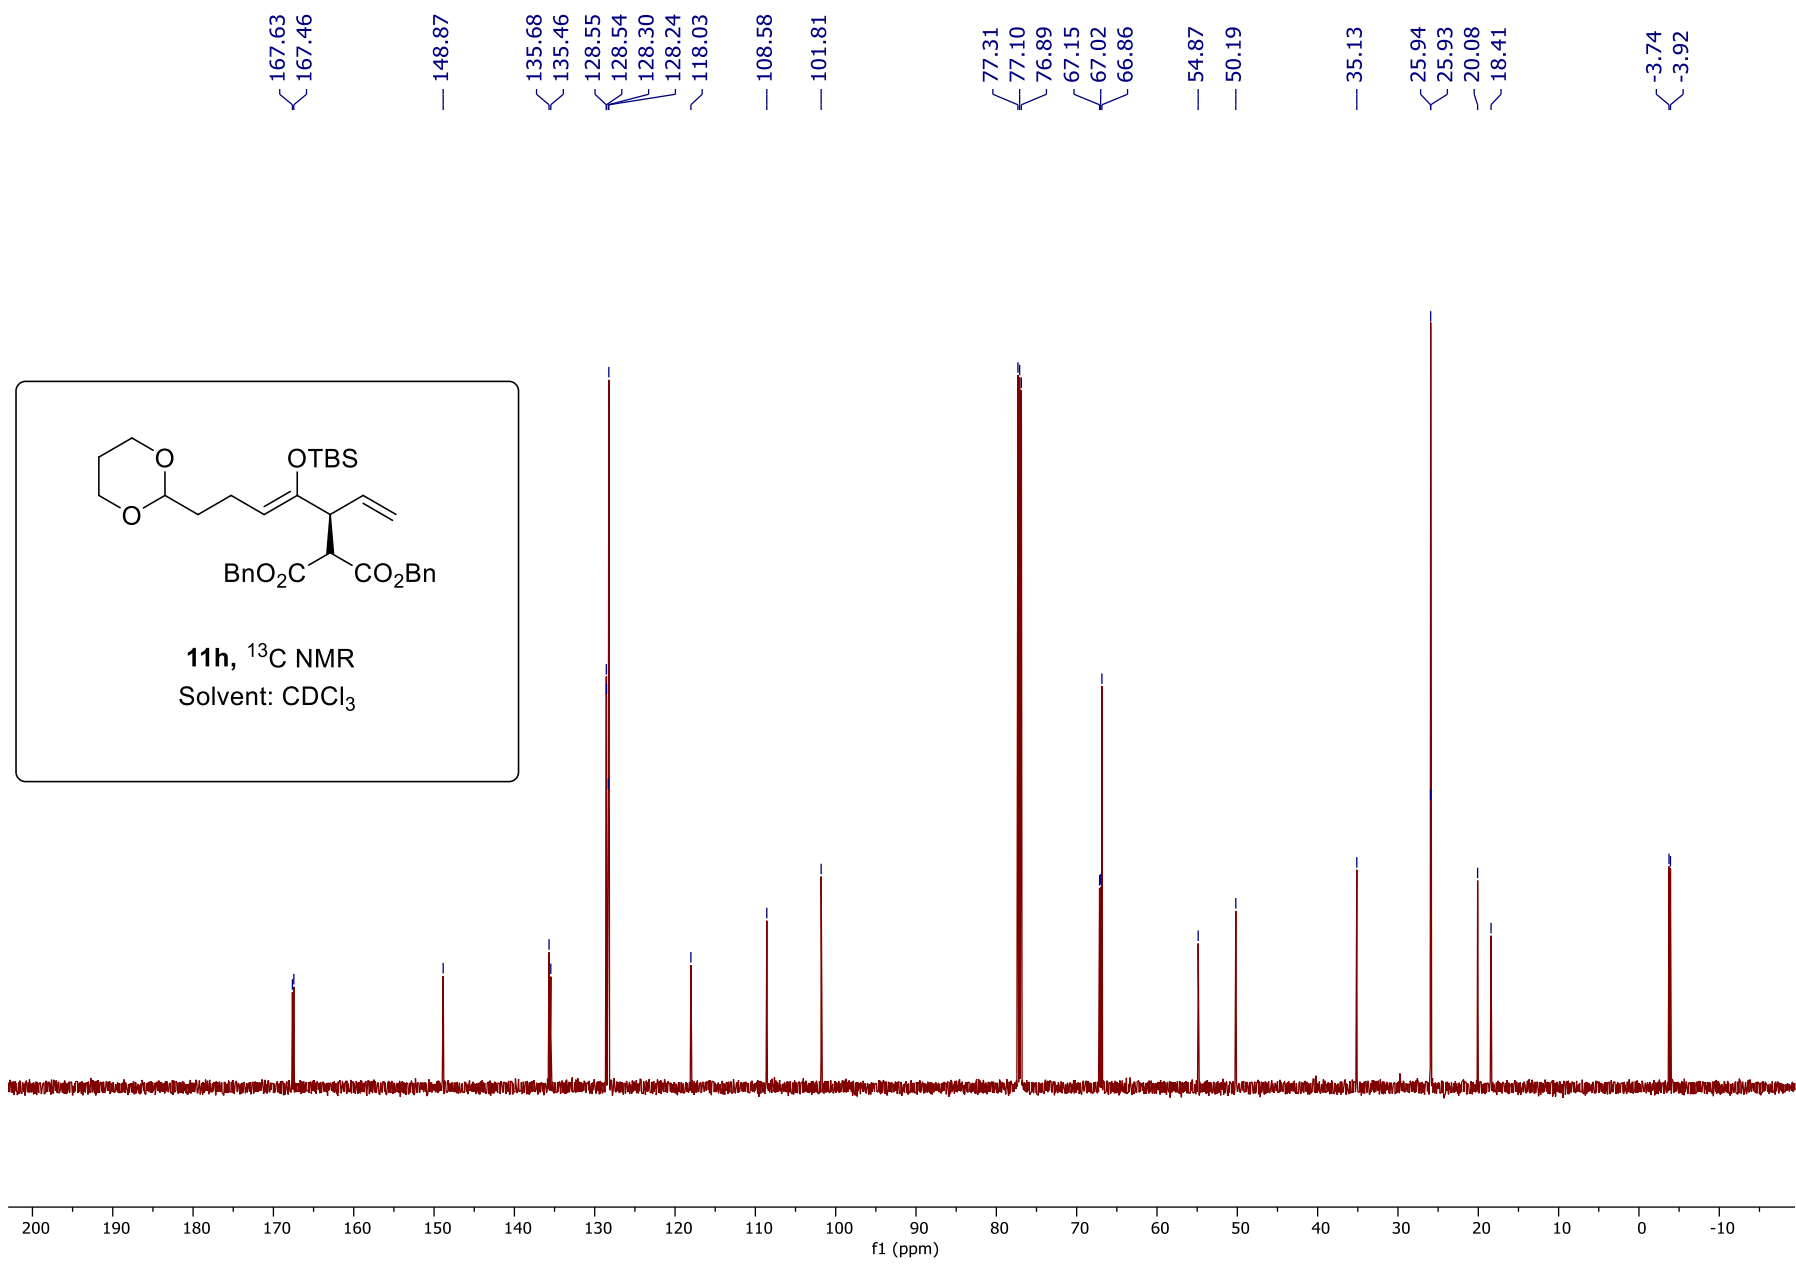



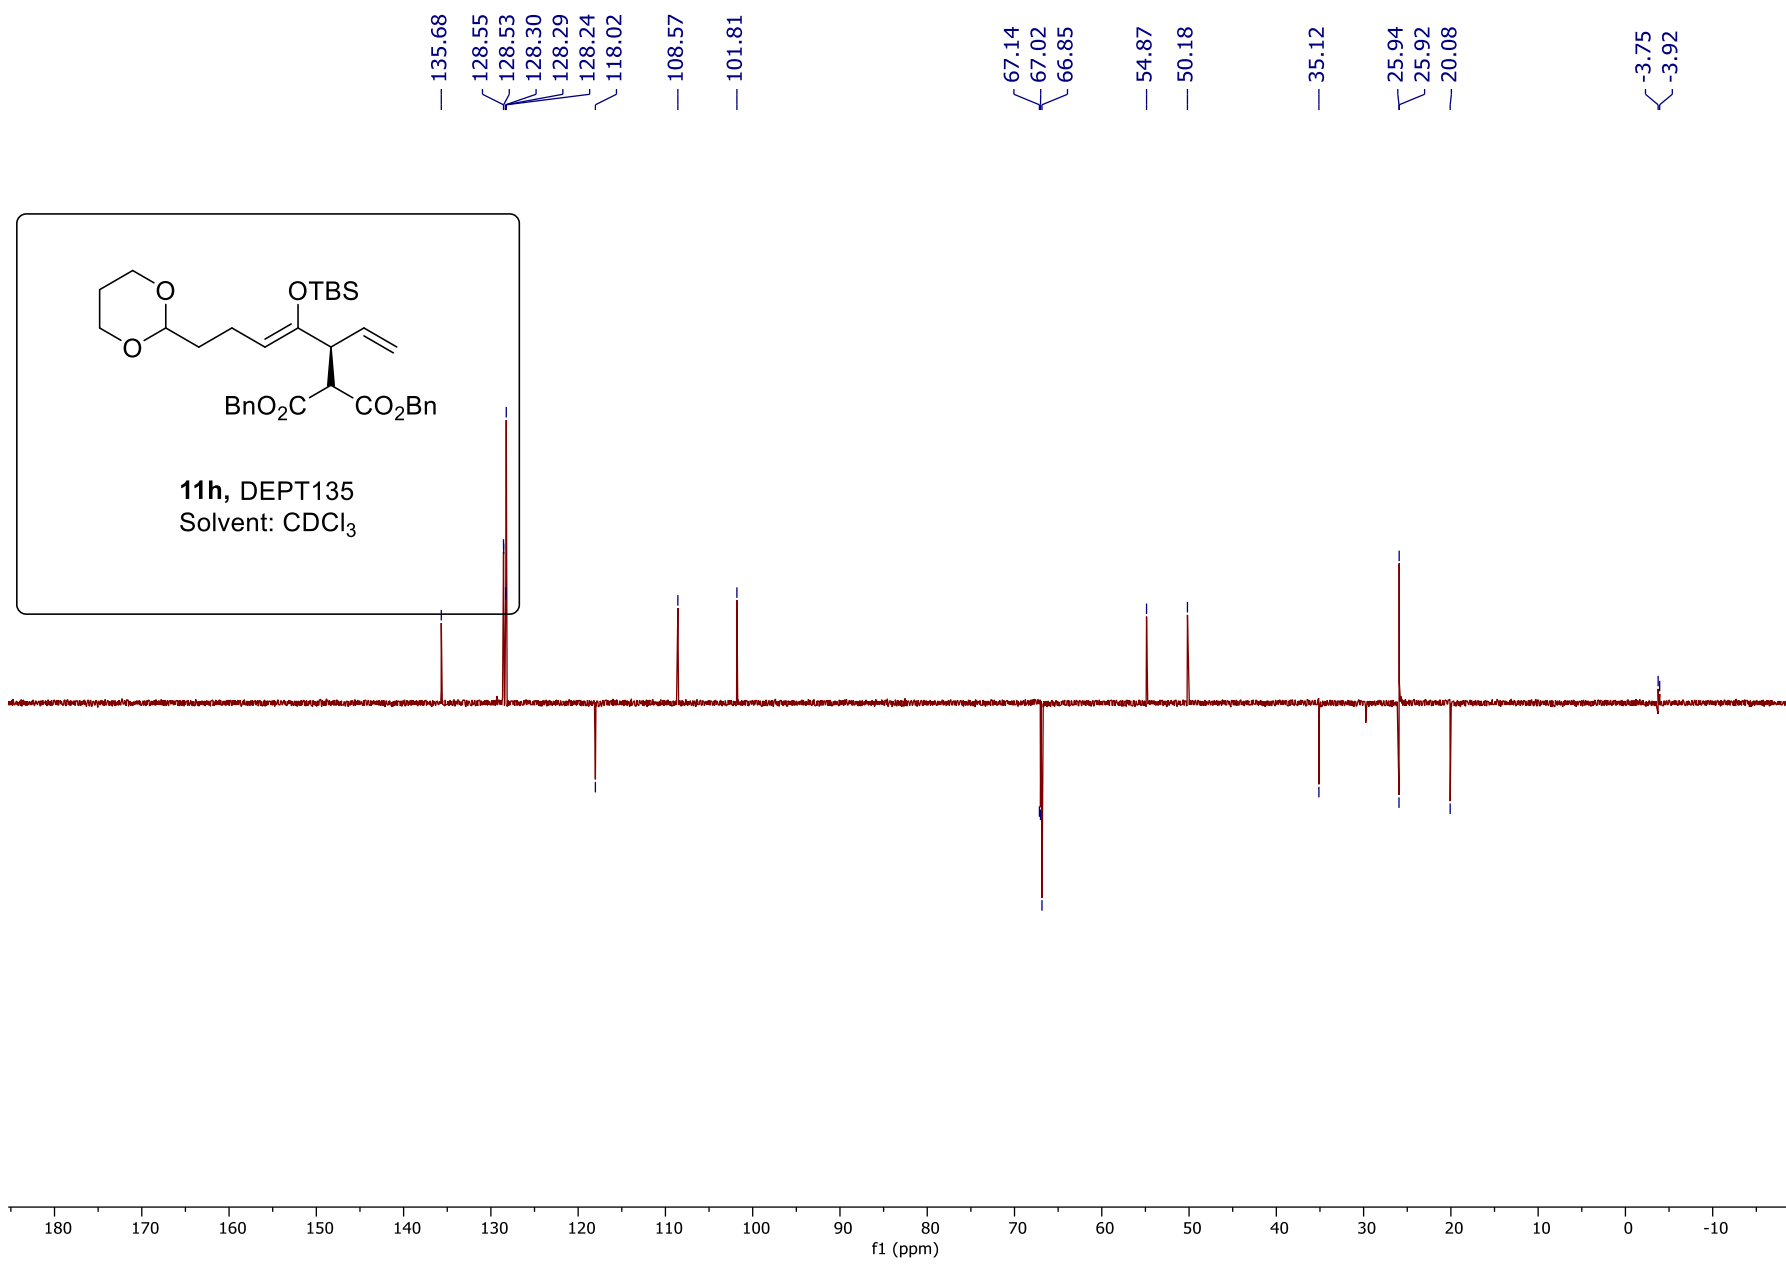

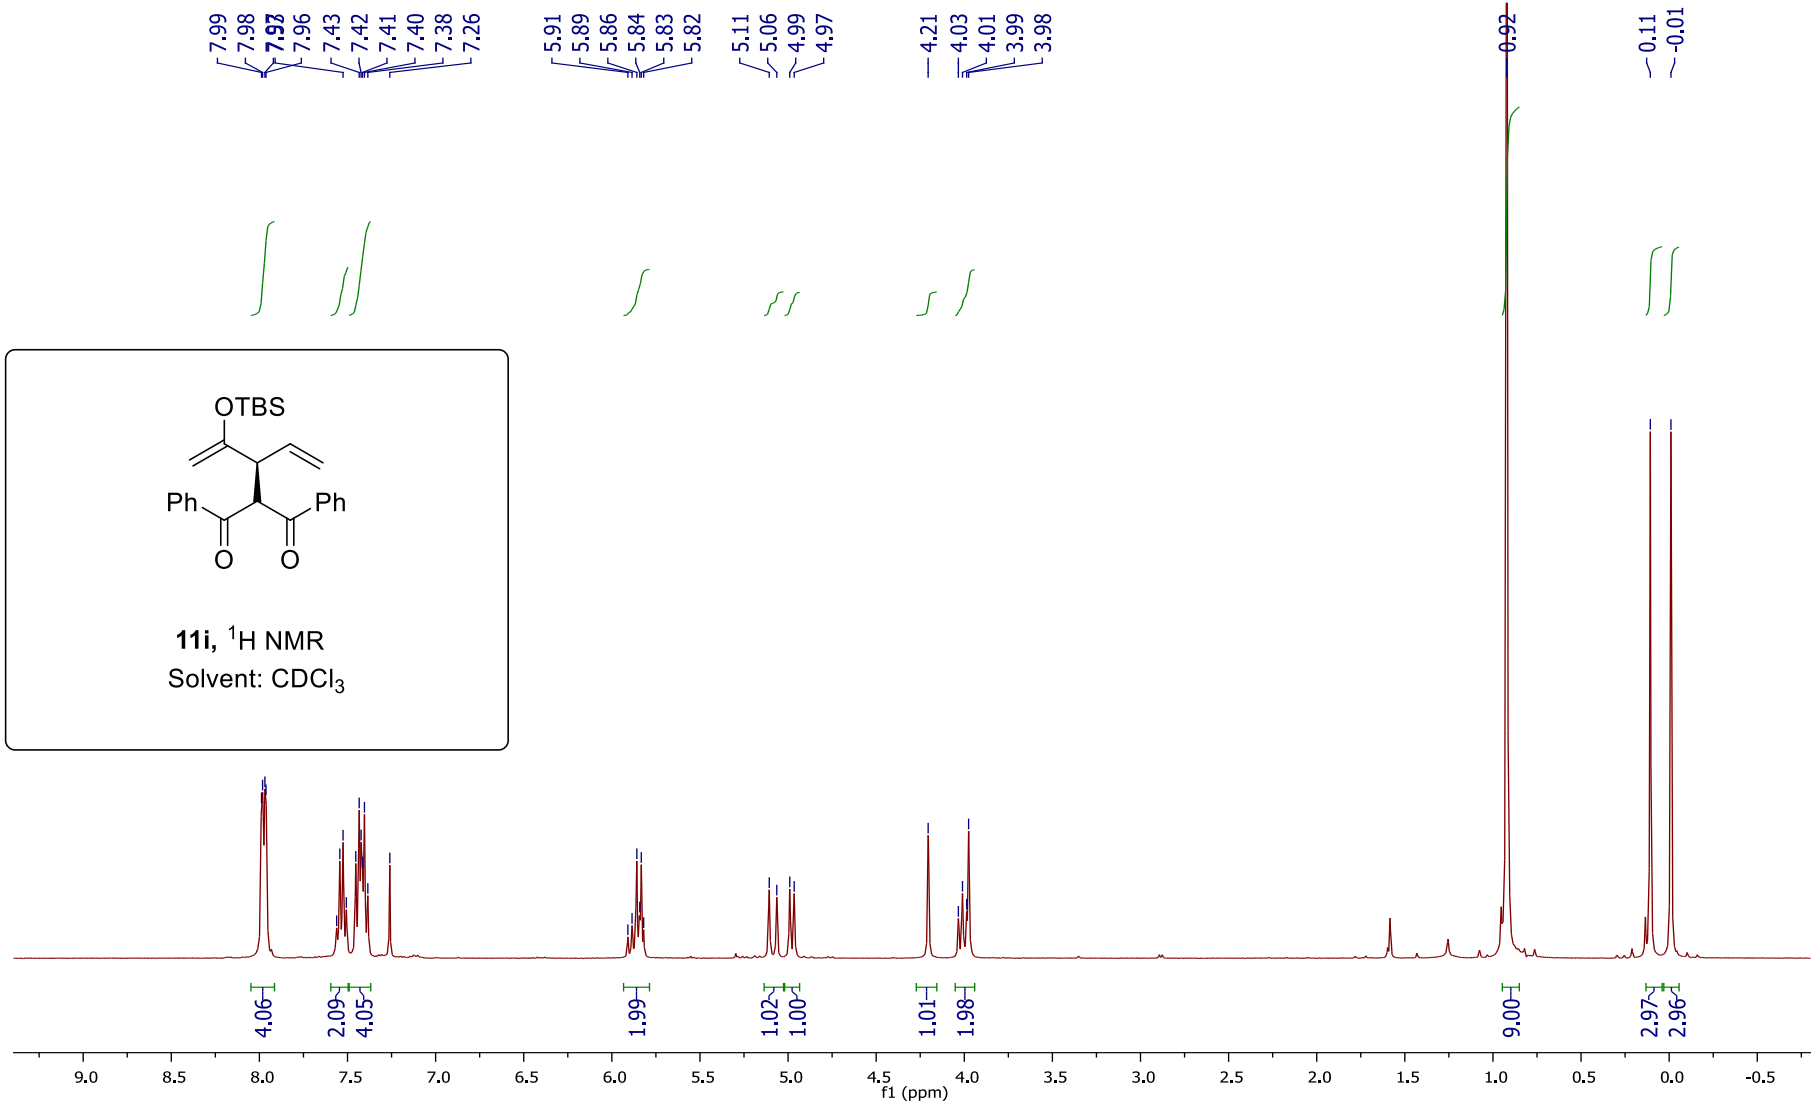

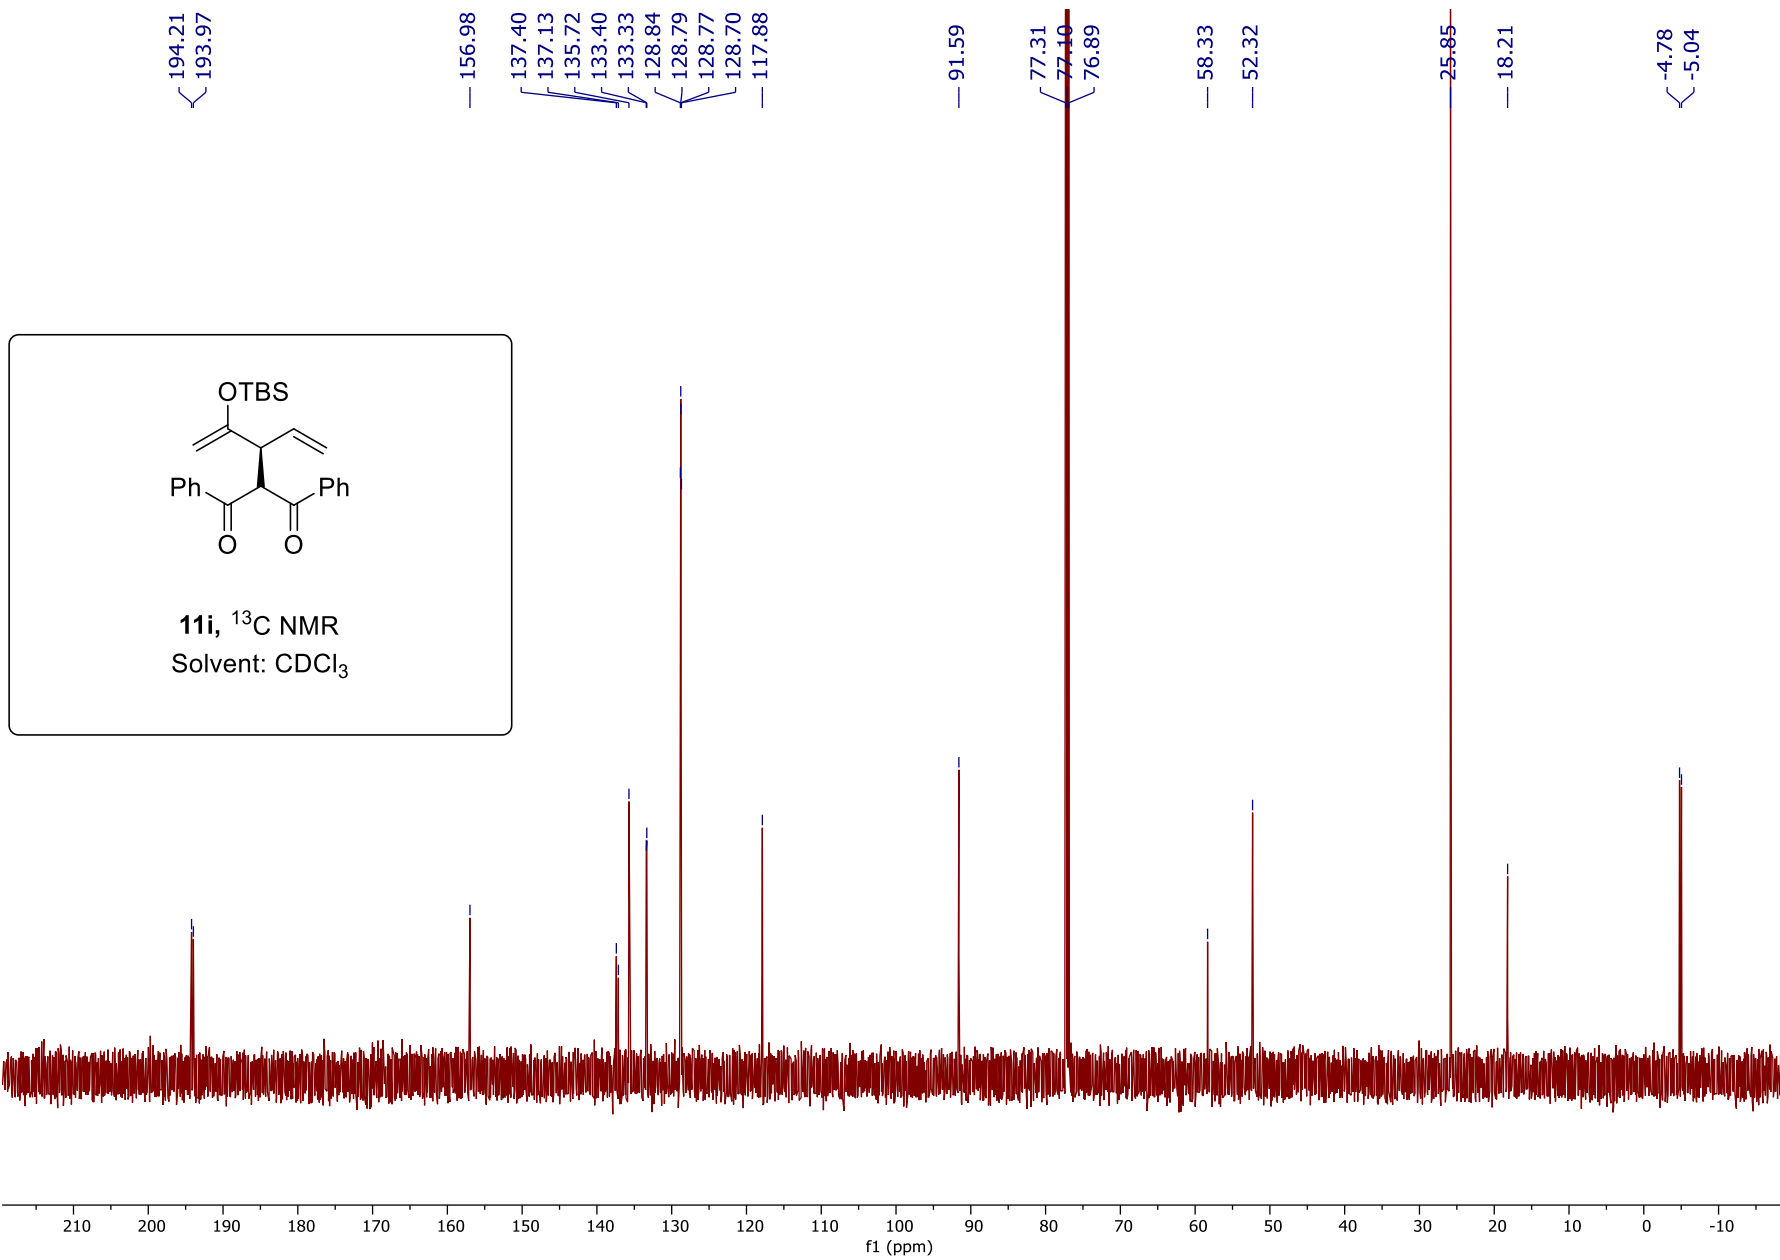

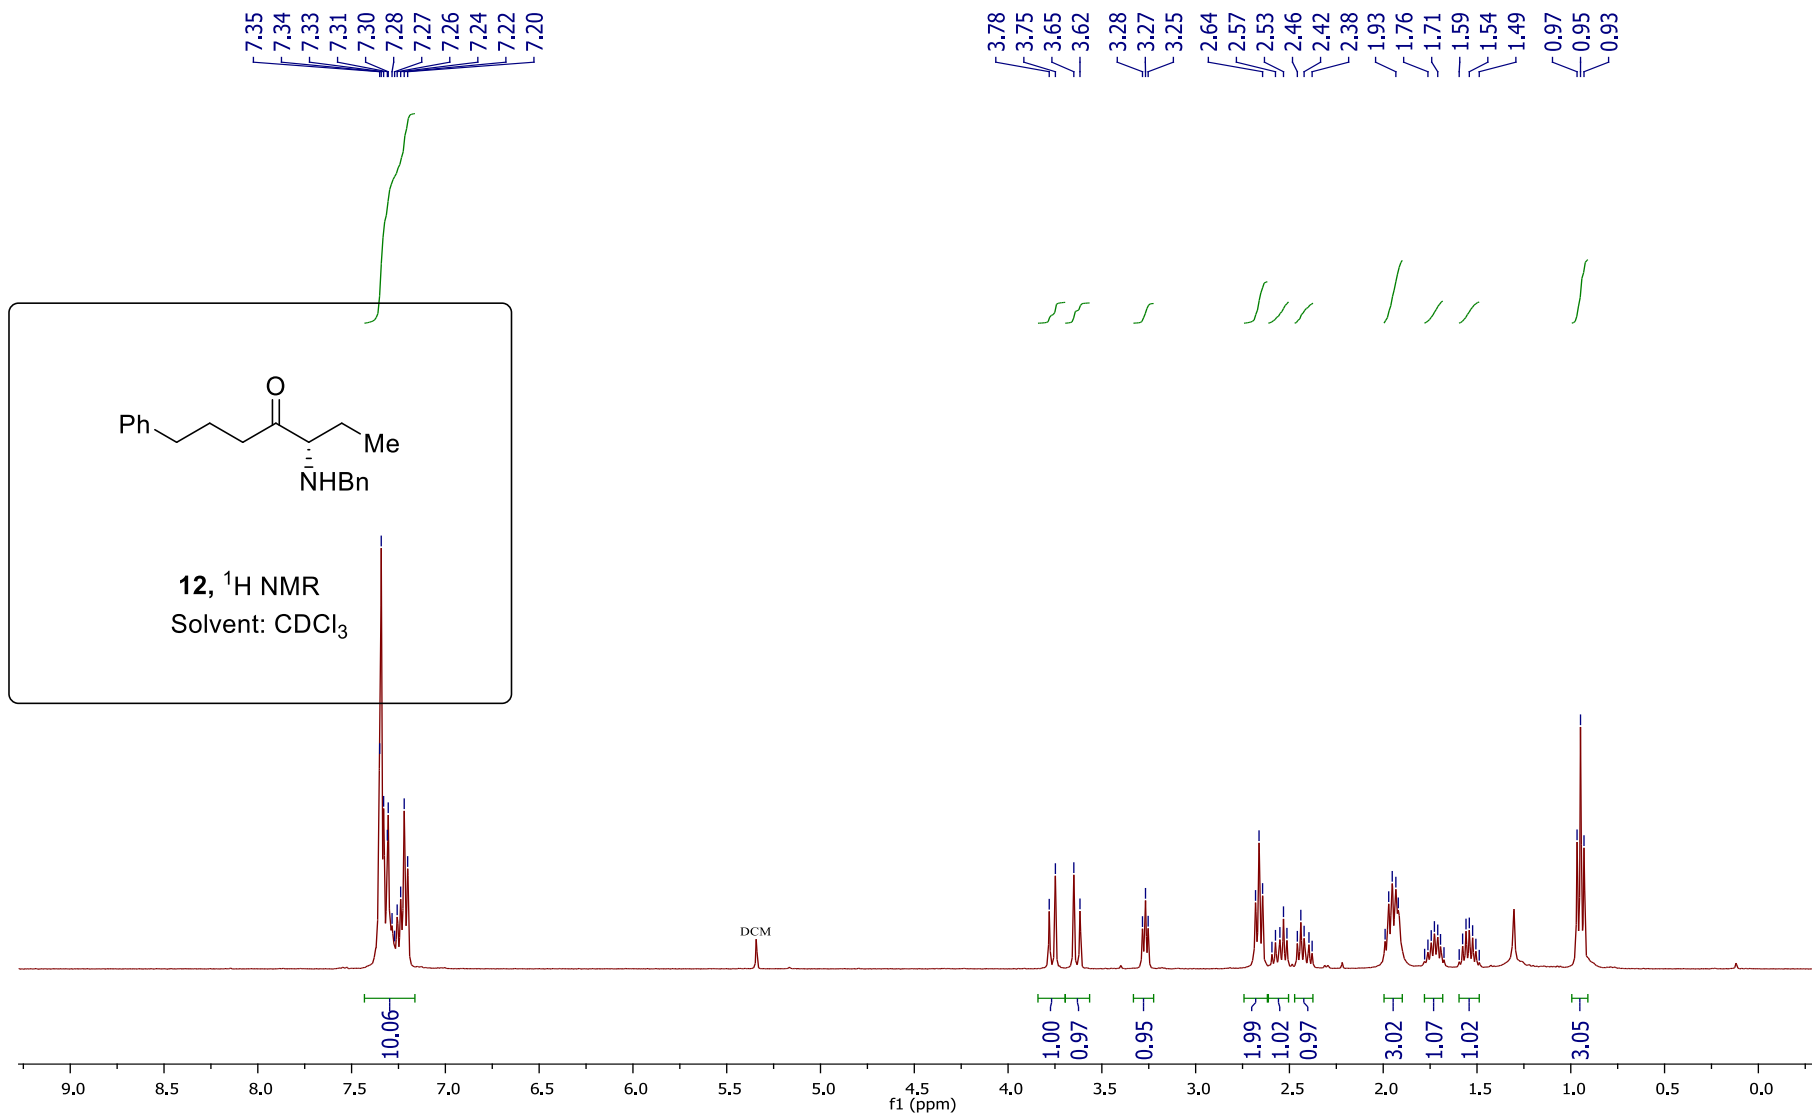

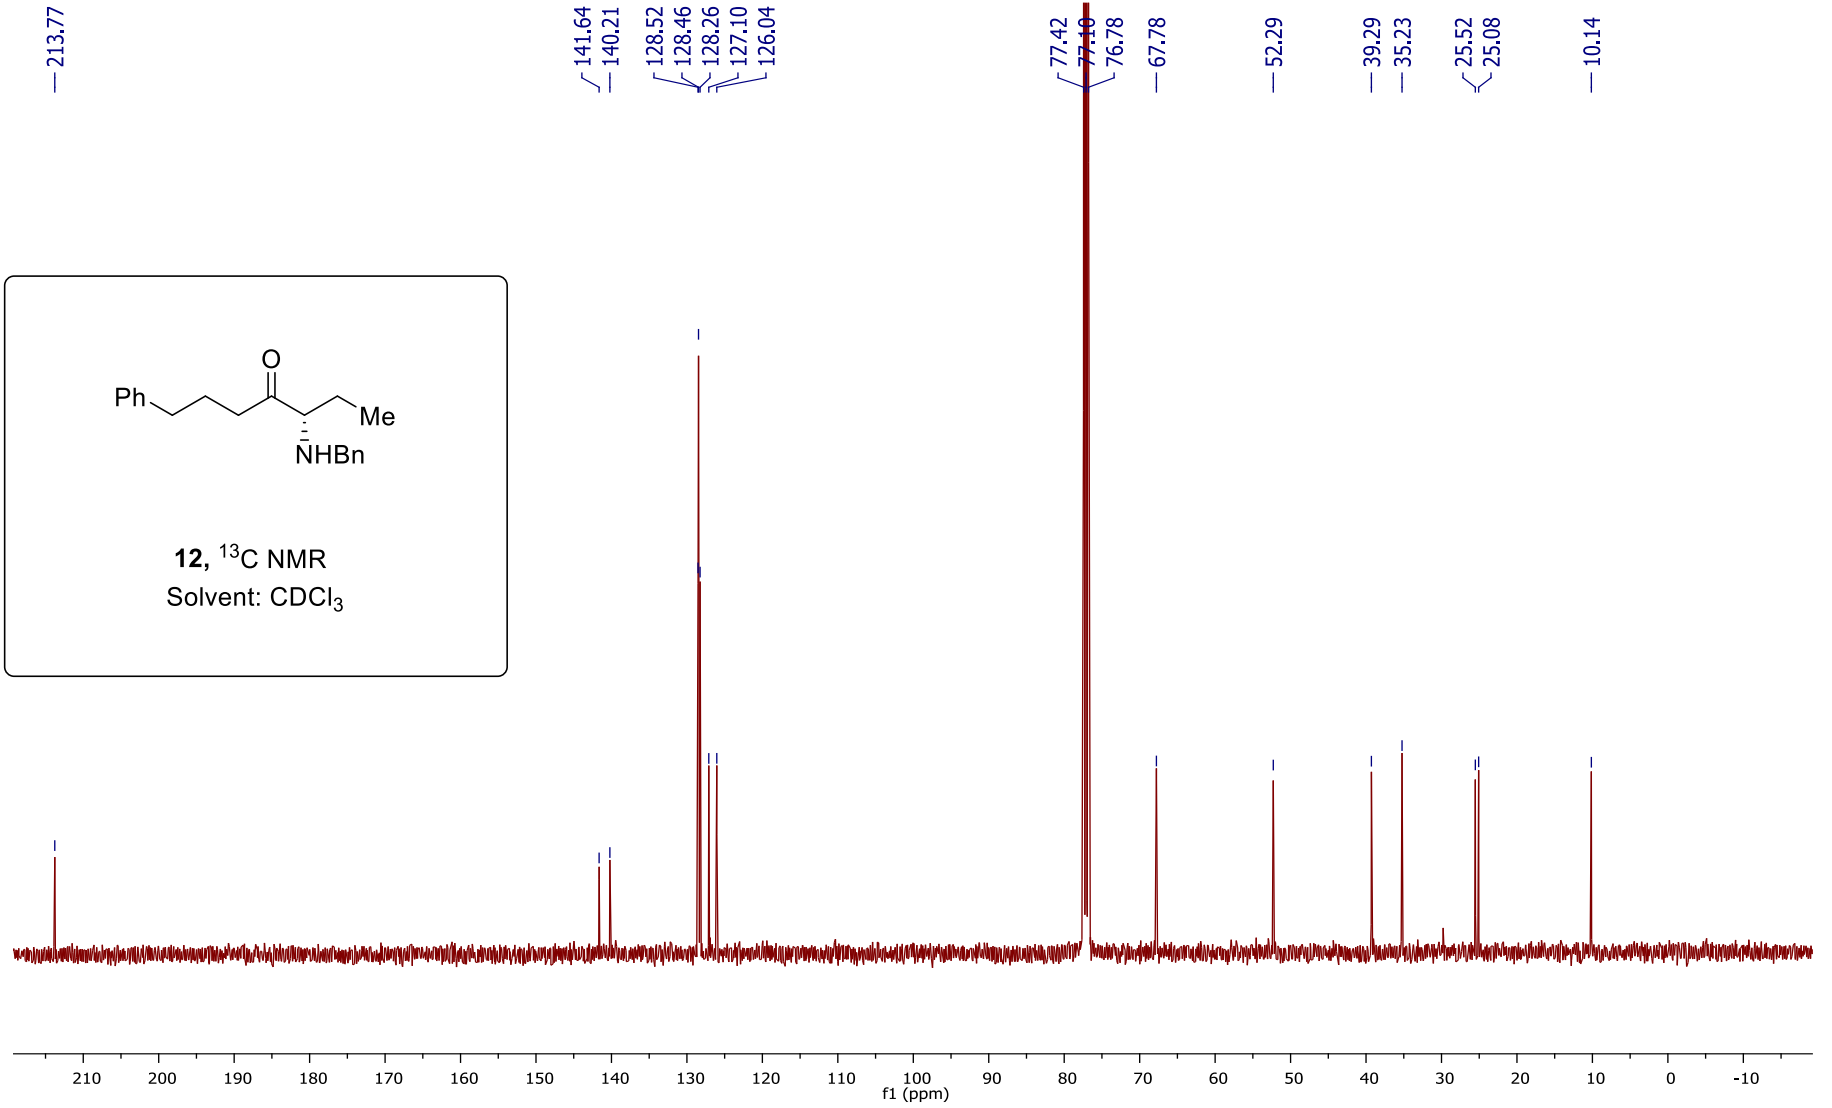

128.52  
128.47  
128.46  
128.26  
127.10  
126.04

— 67.79

— 52.29

— 39.28

— 35.23

— 25.51  
— 25.07

— 10.13

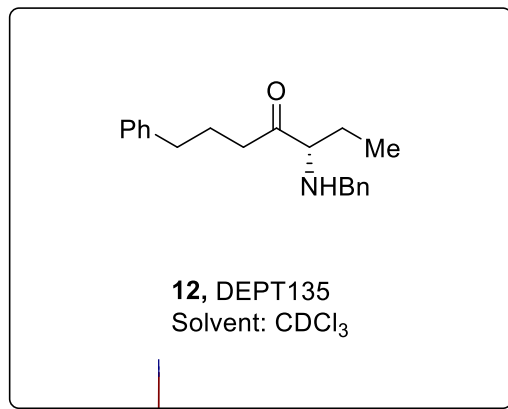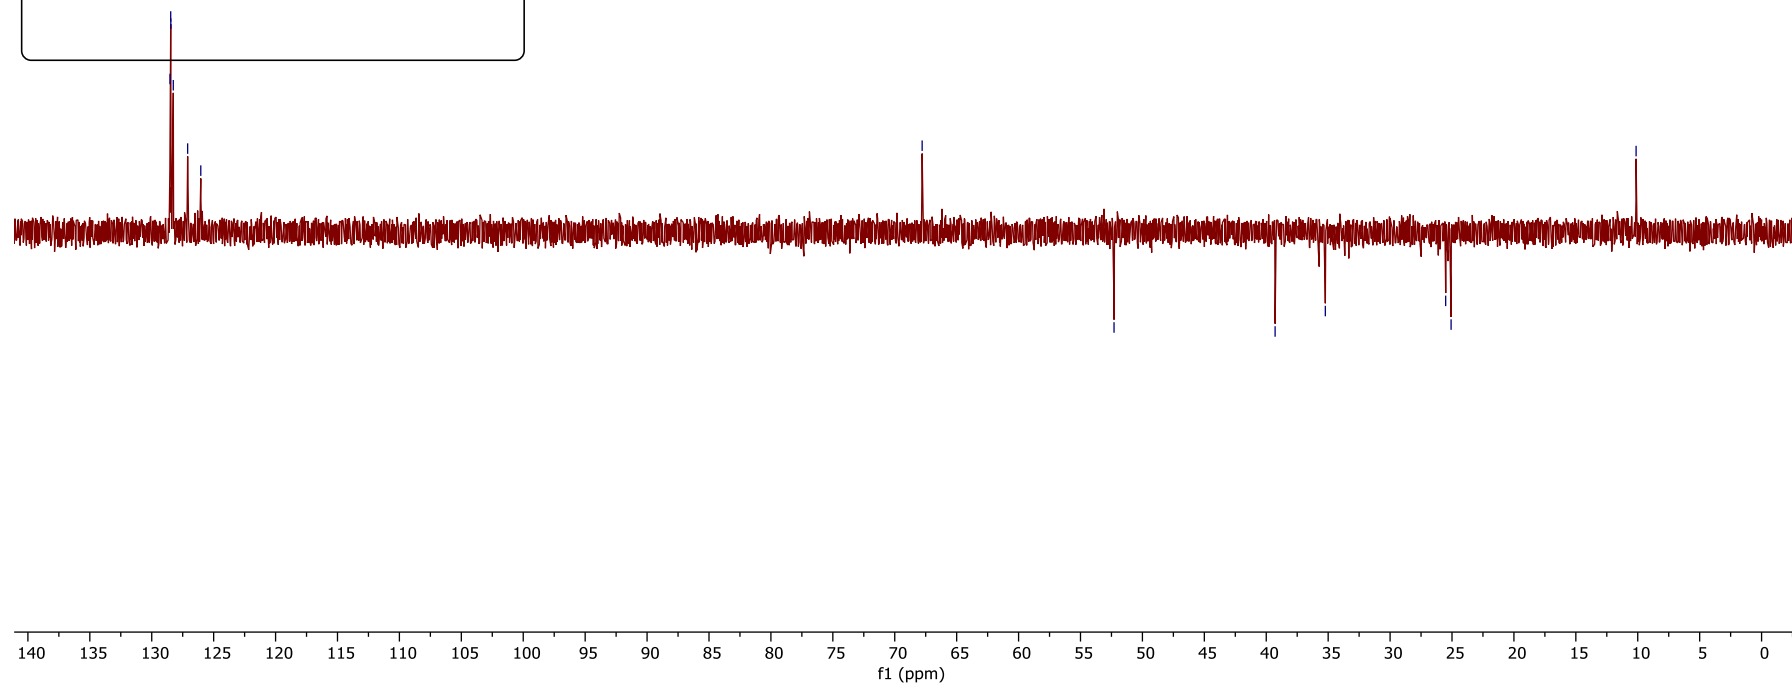

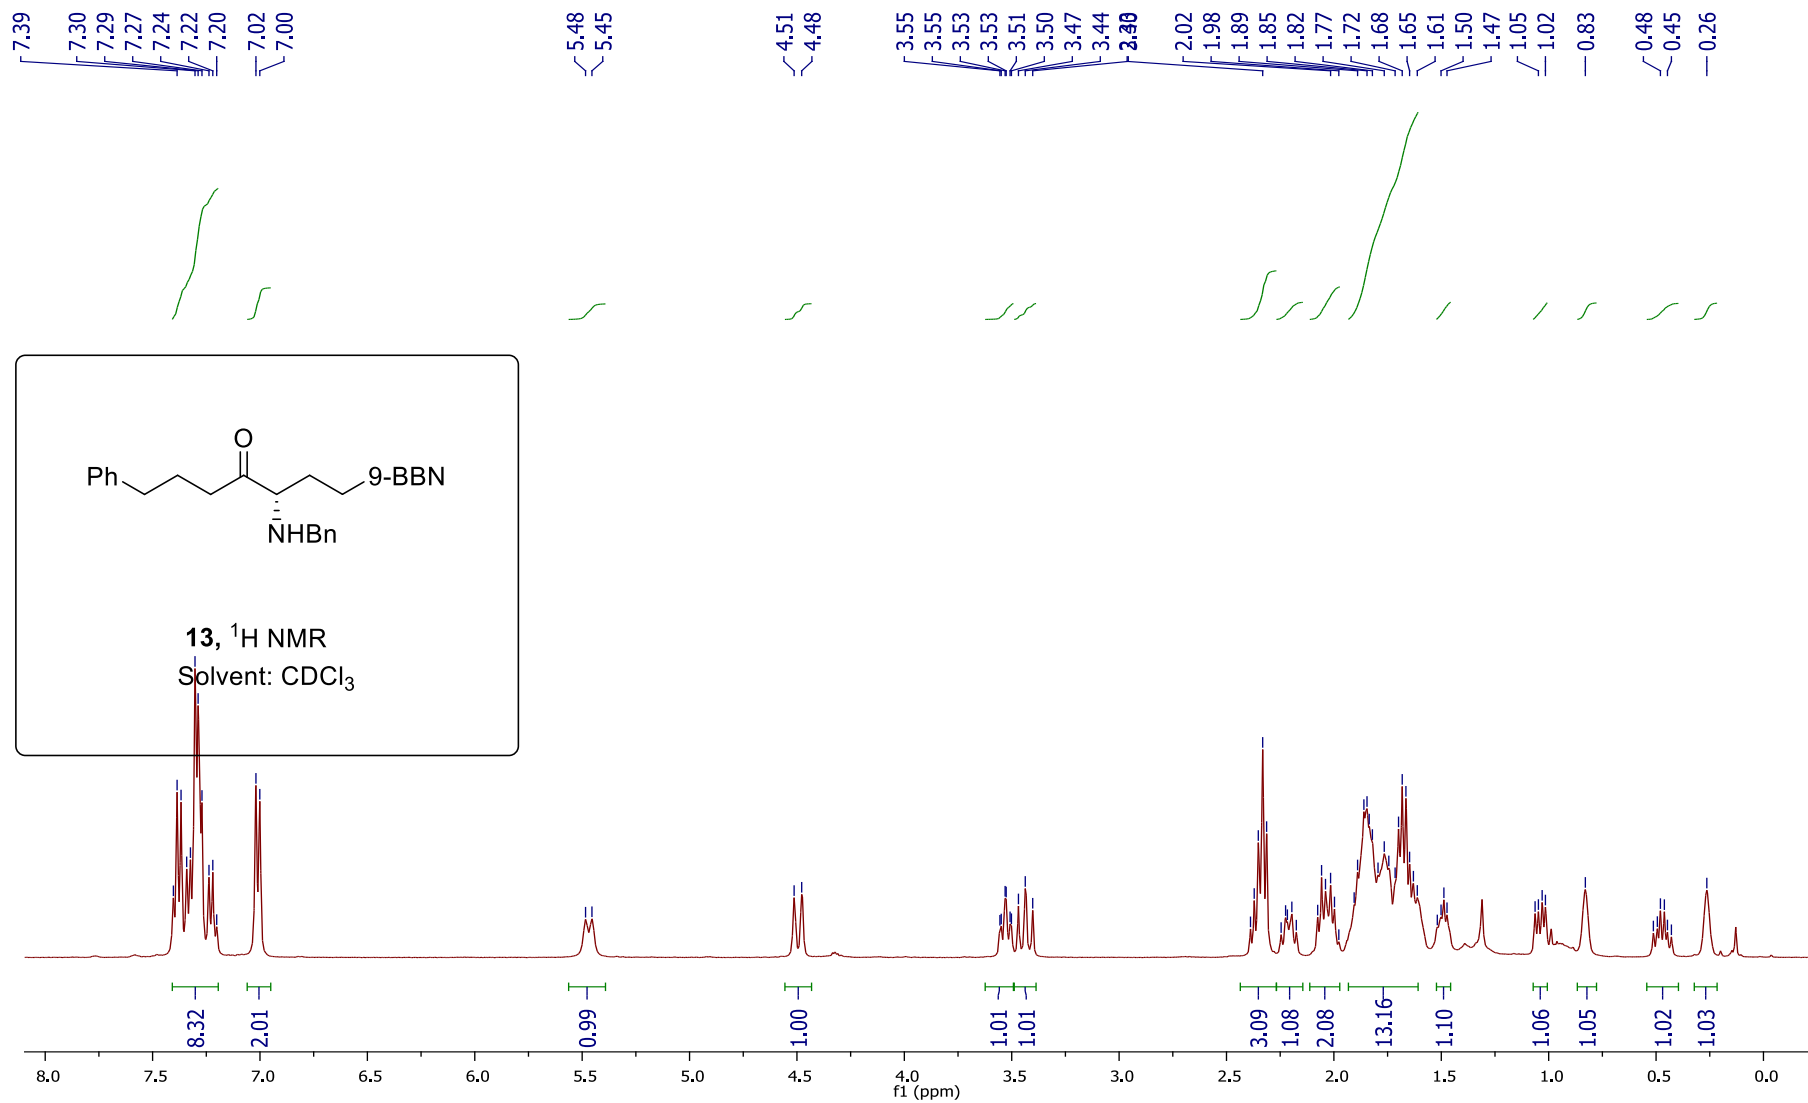

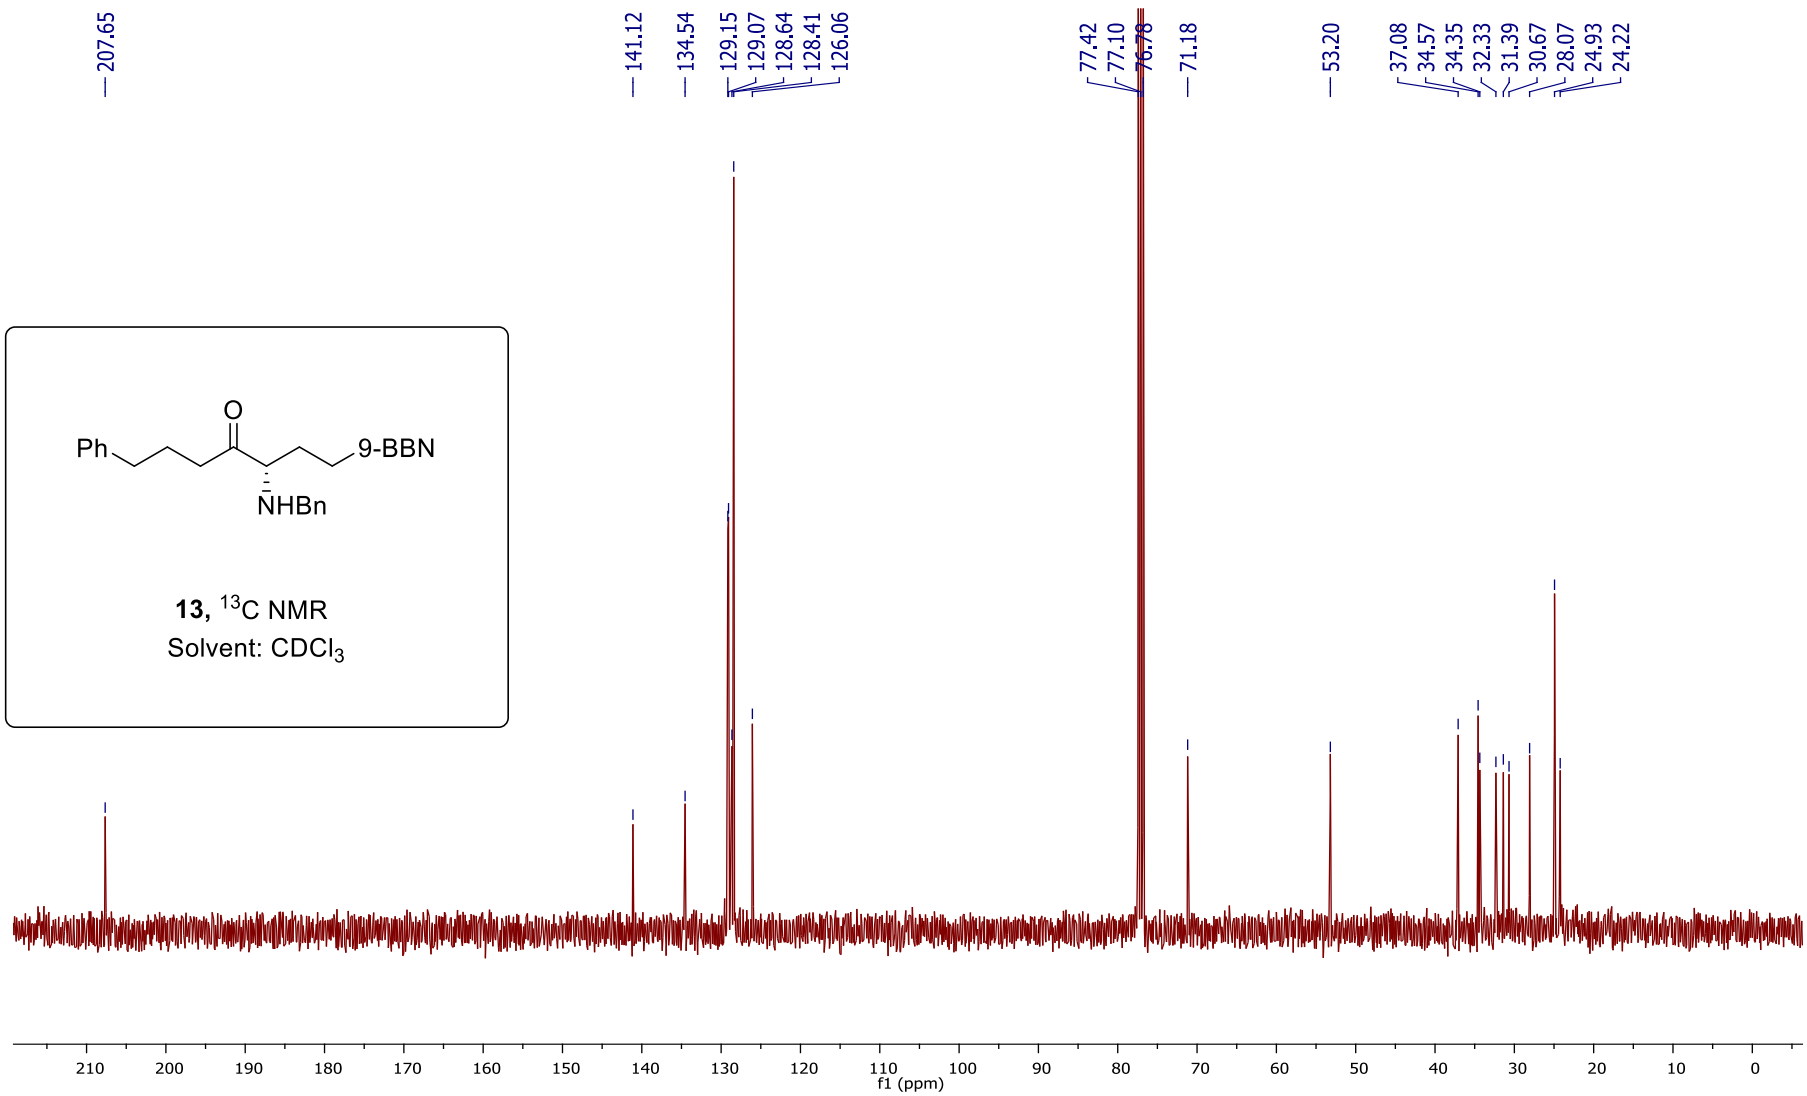



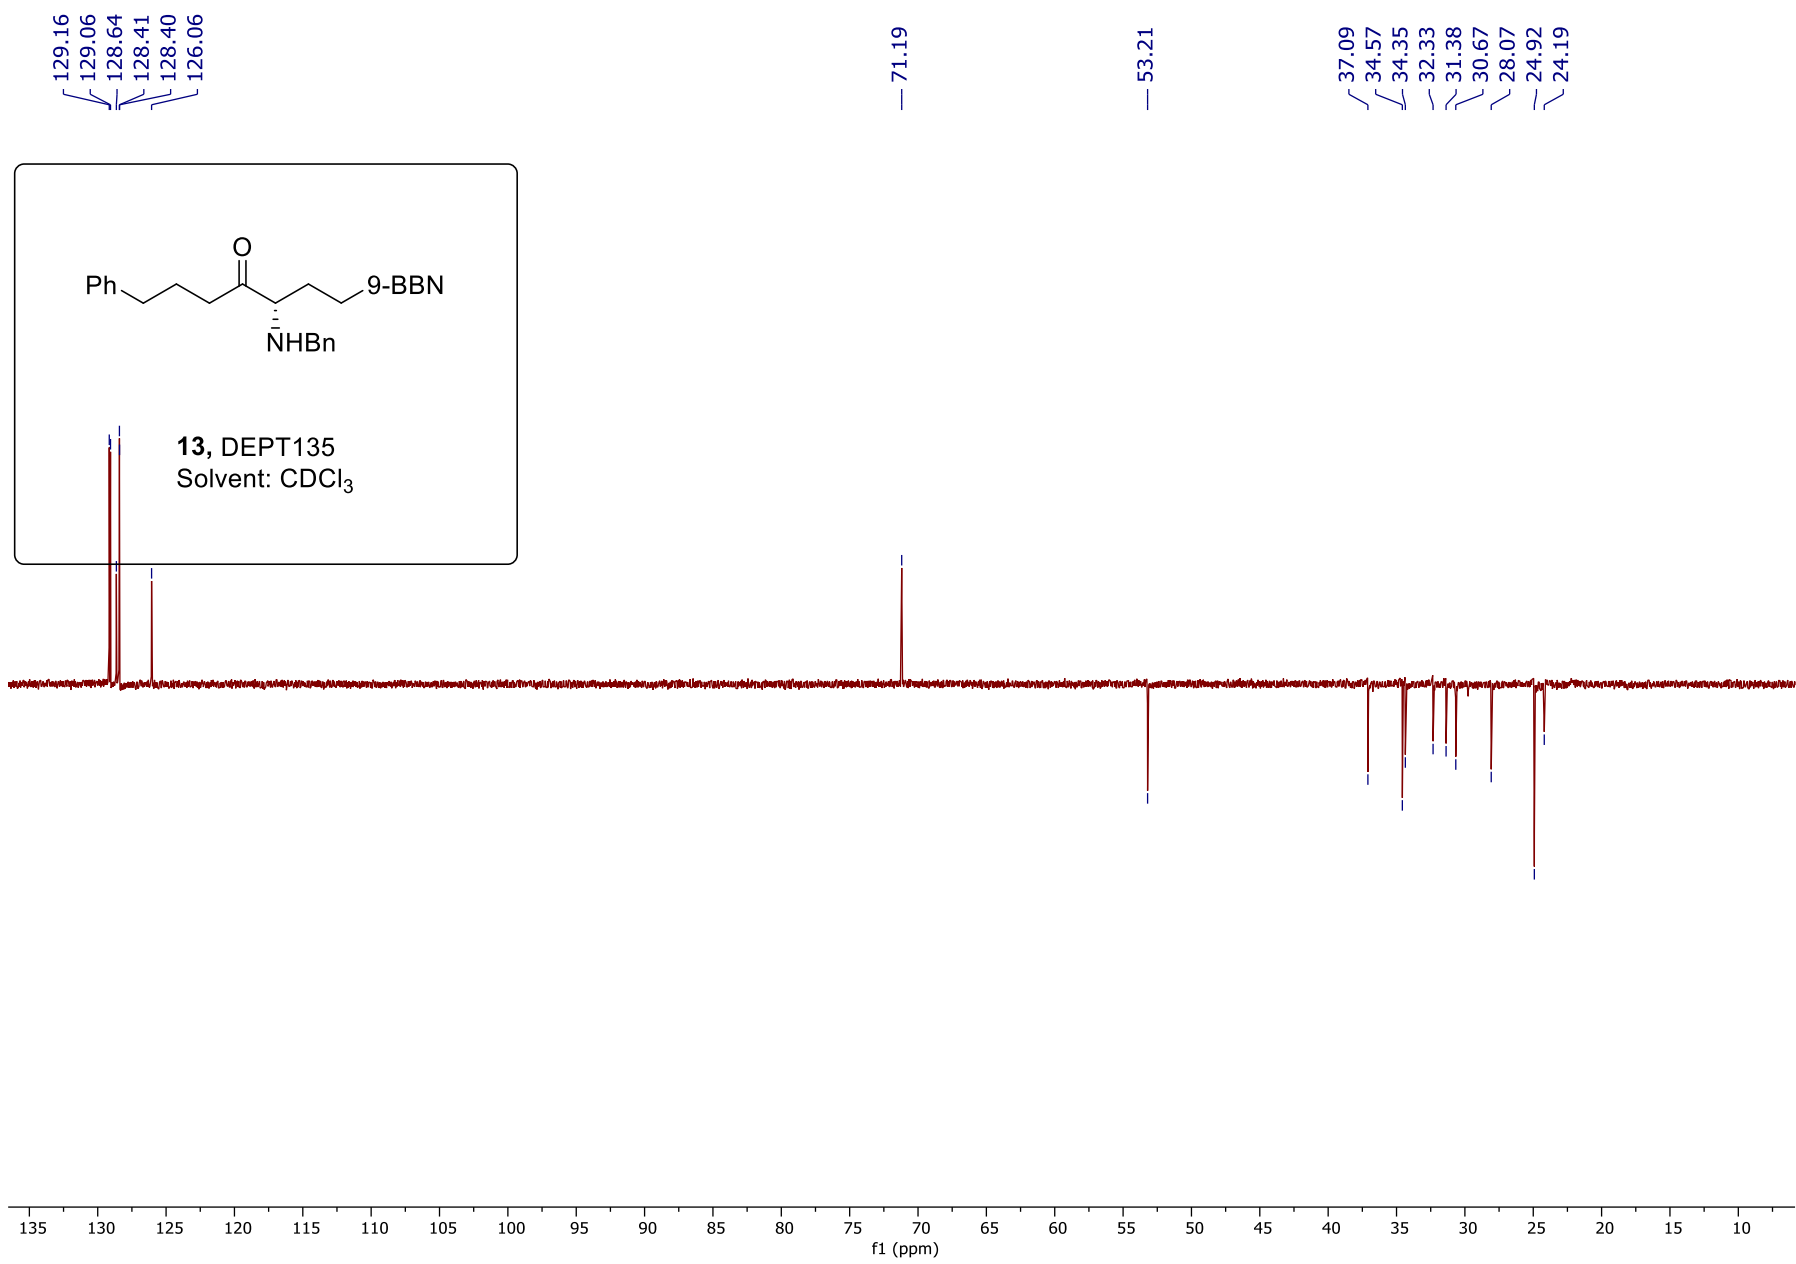

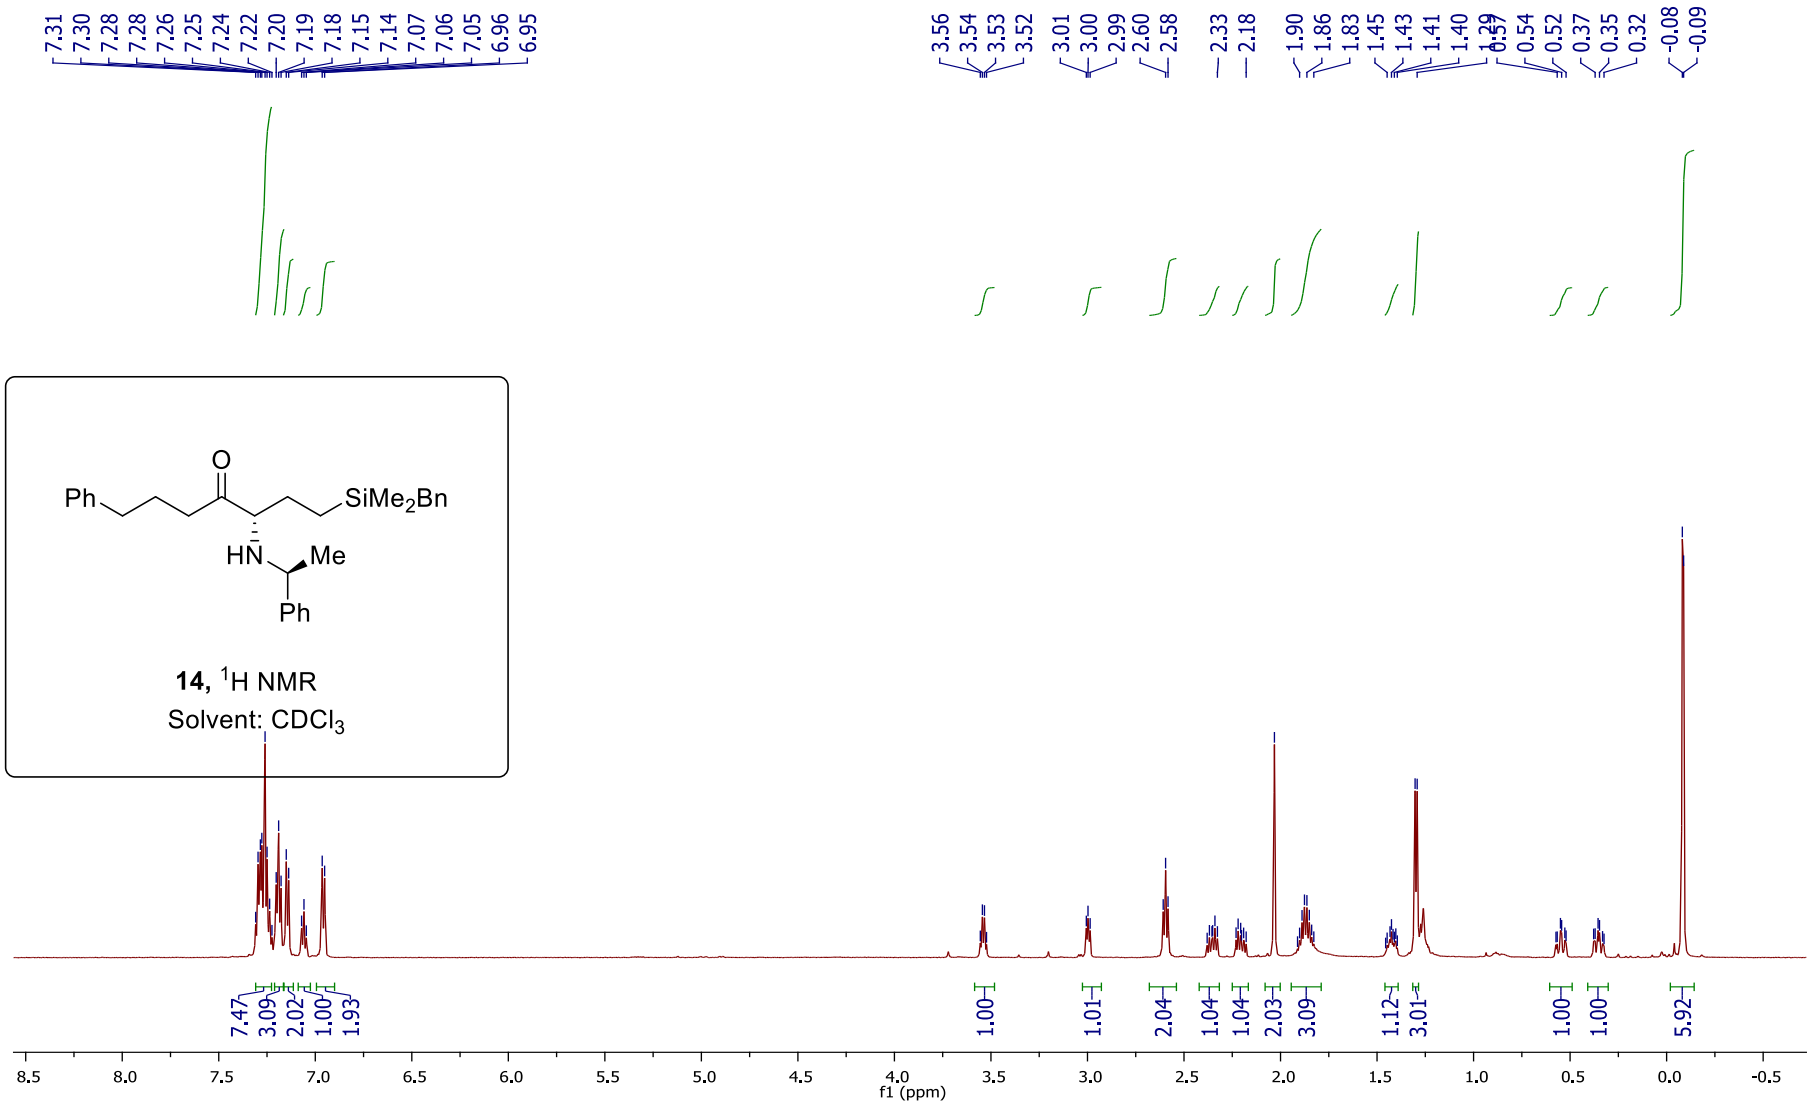

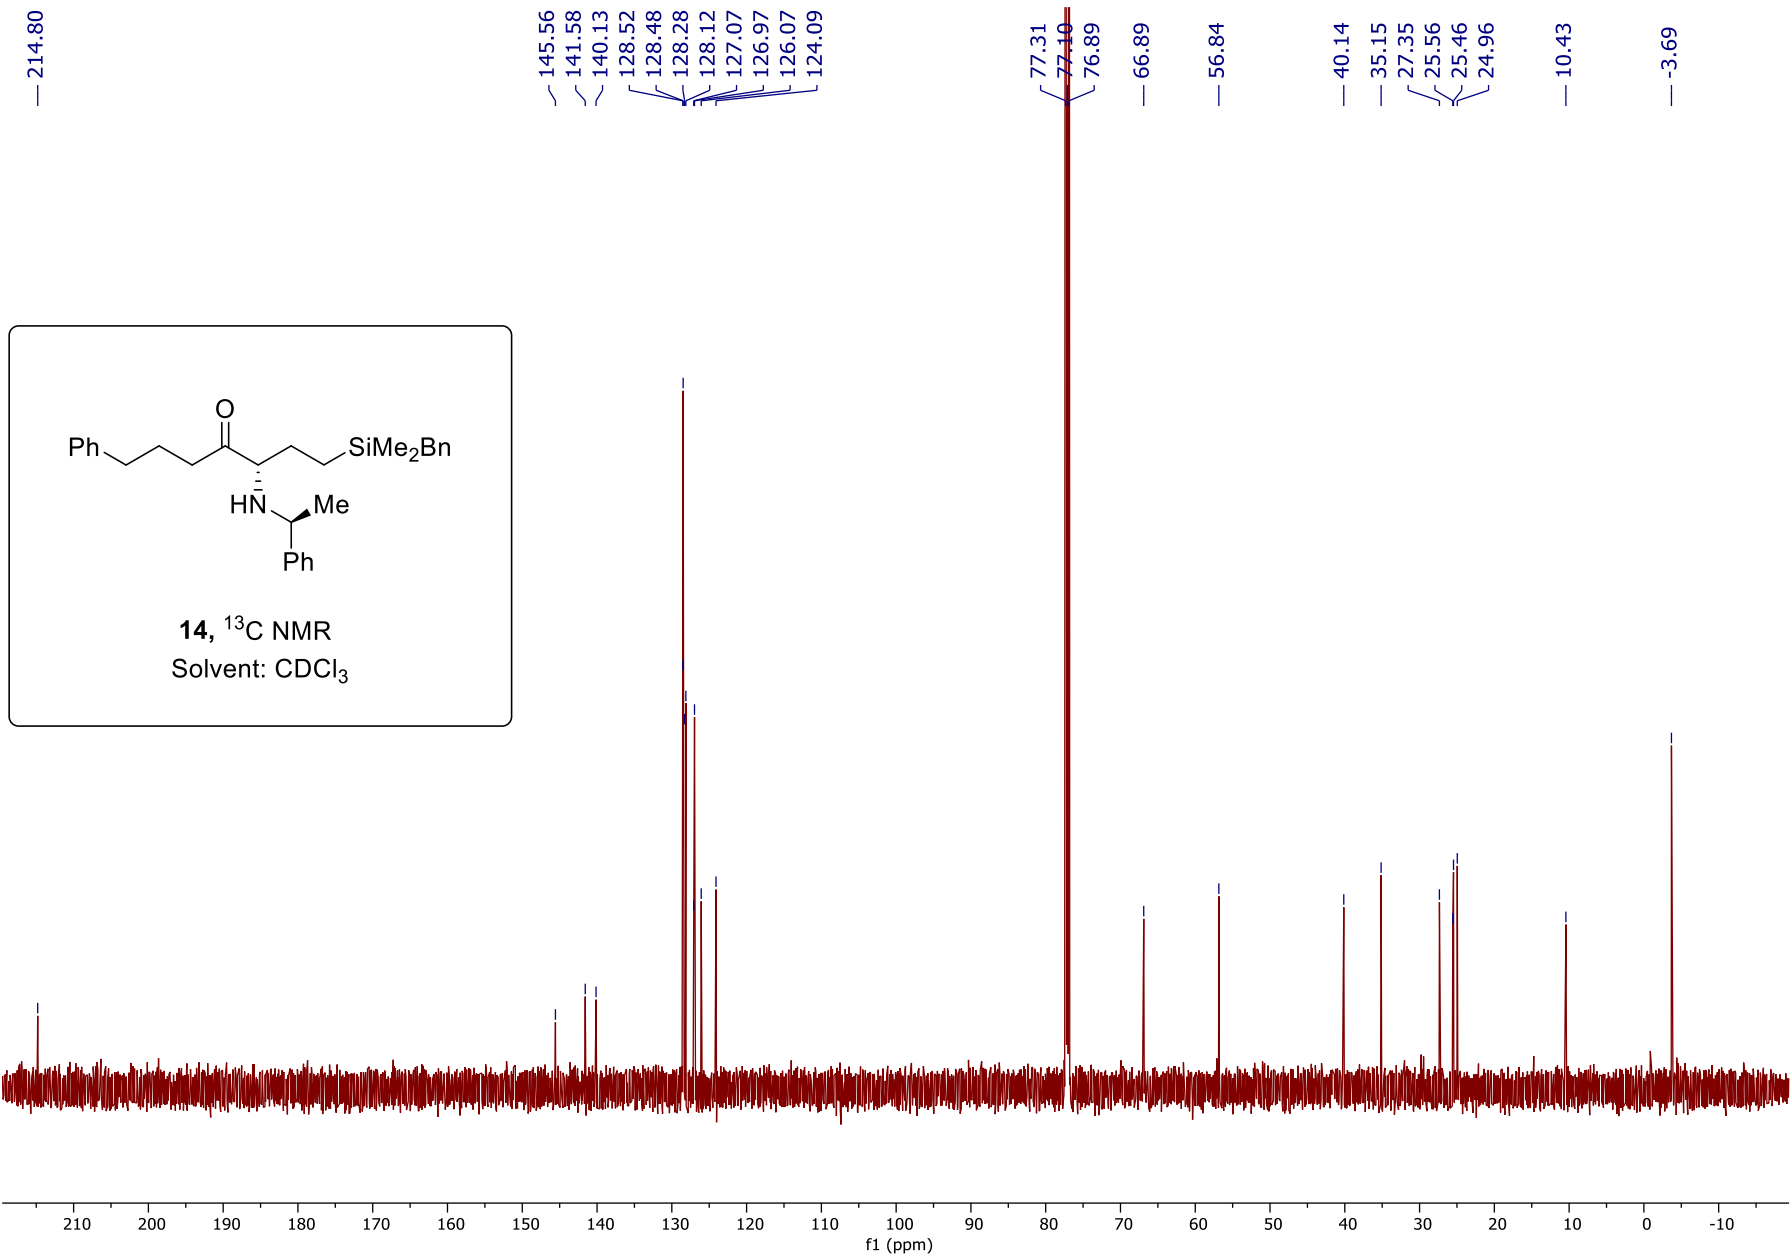

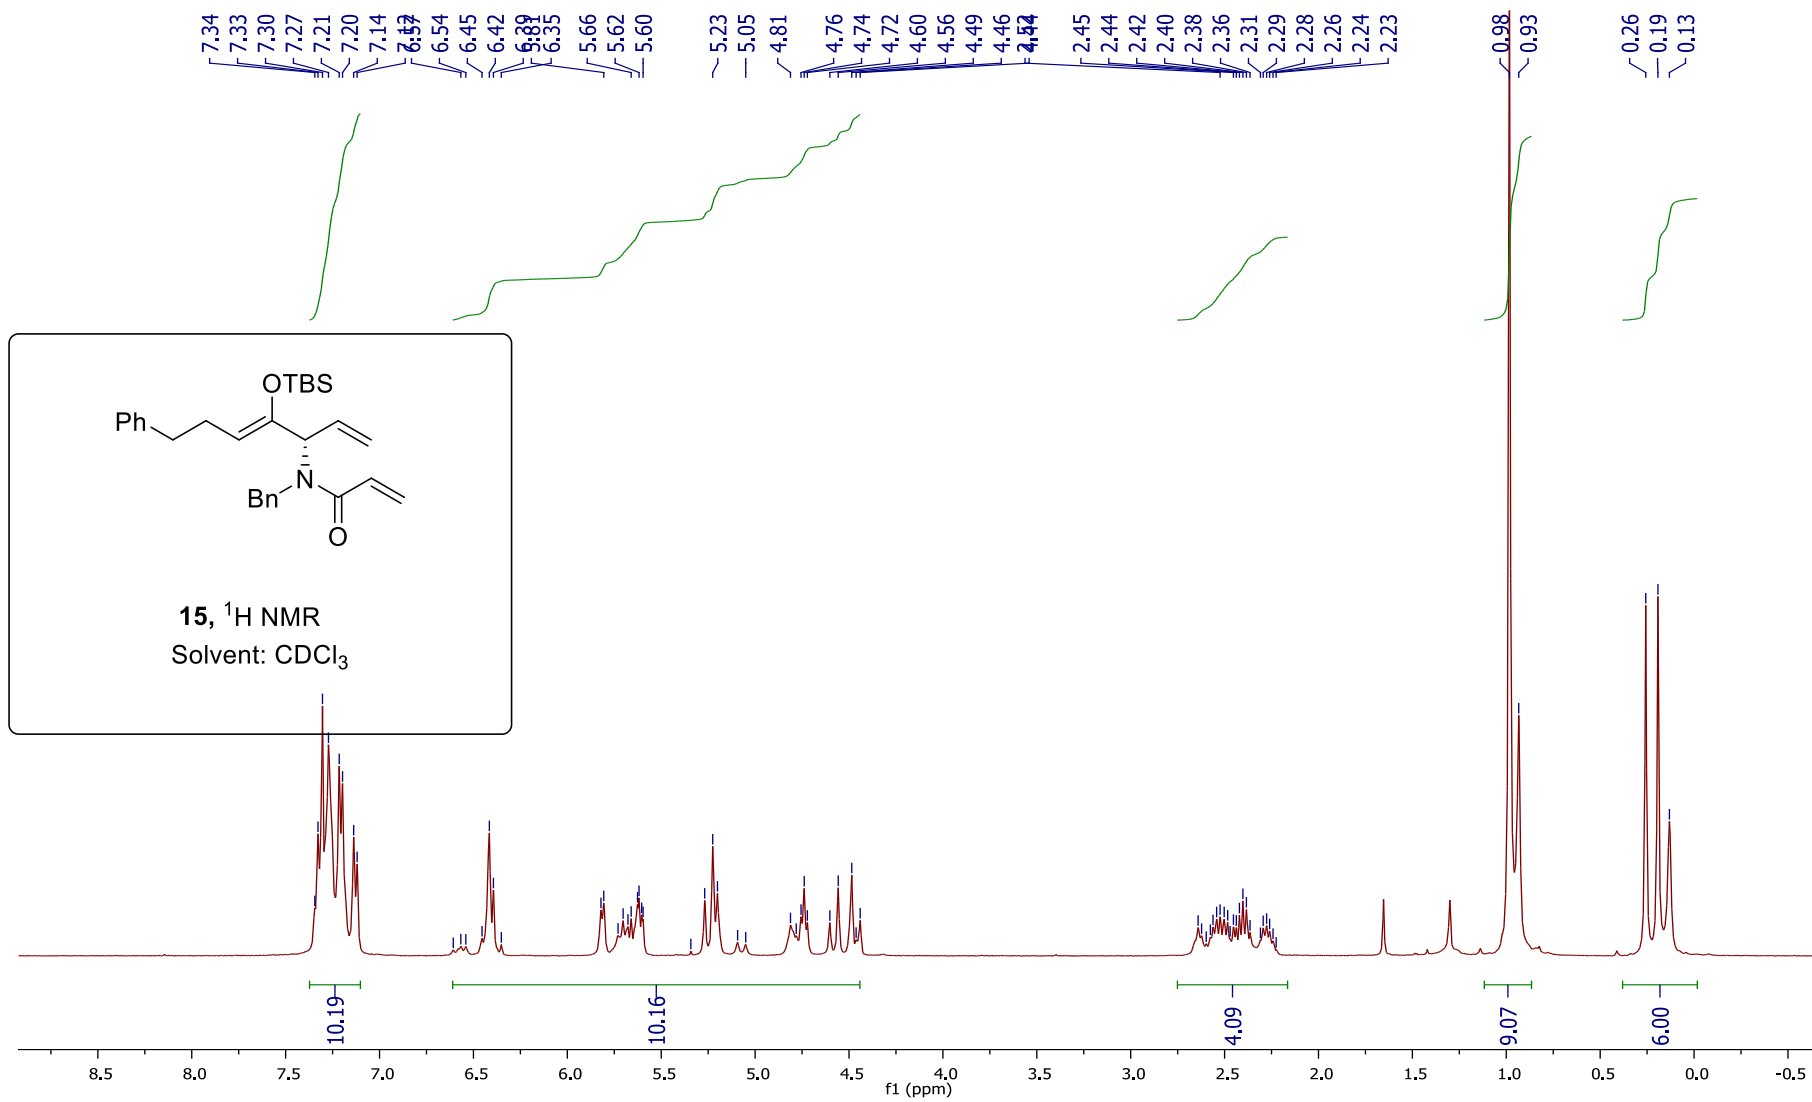

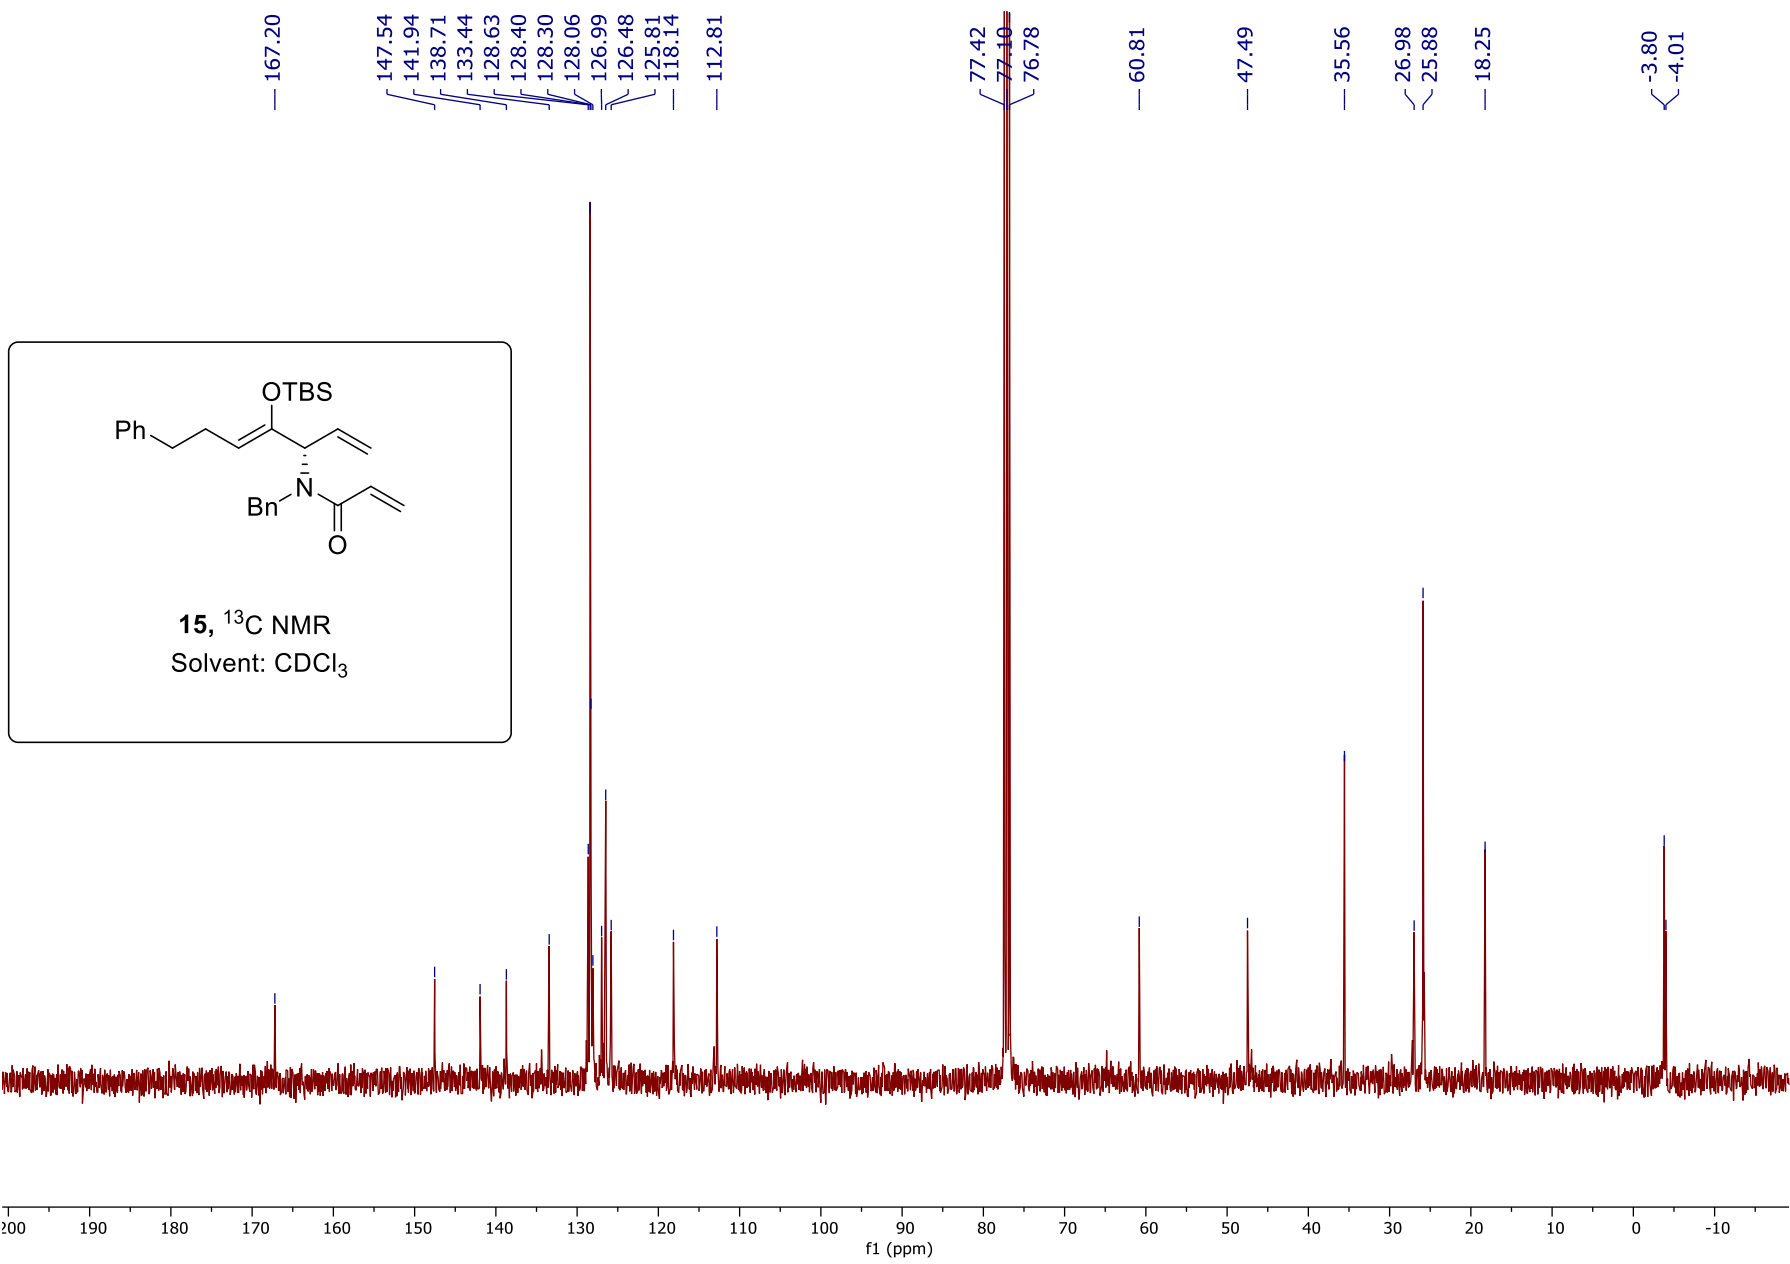

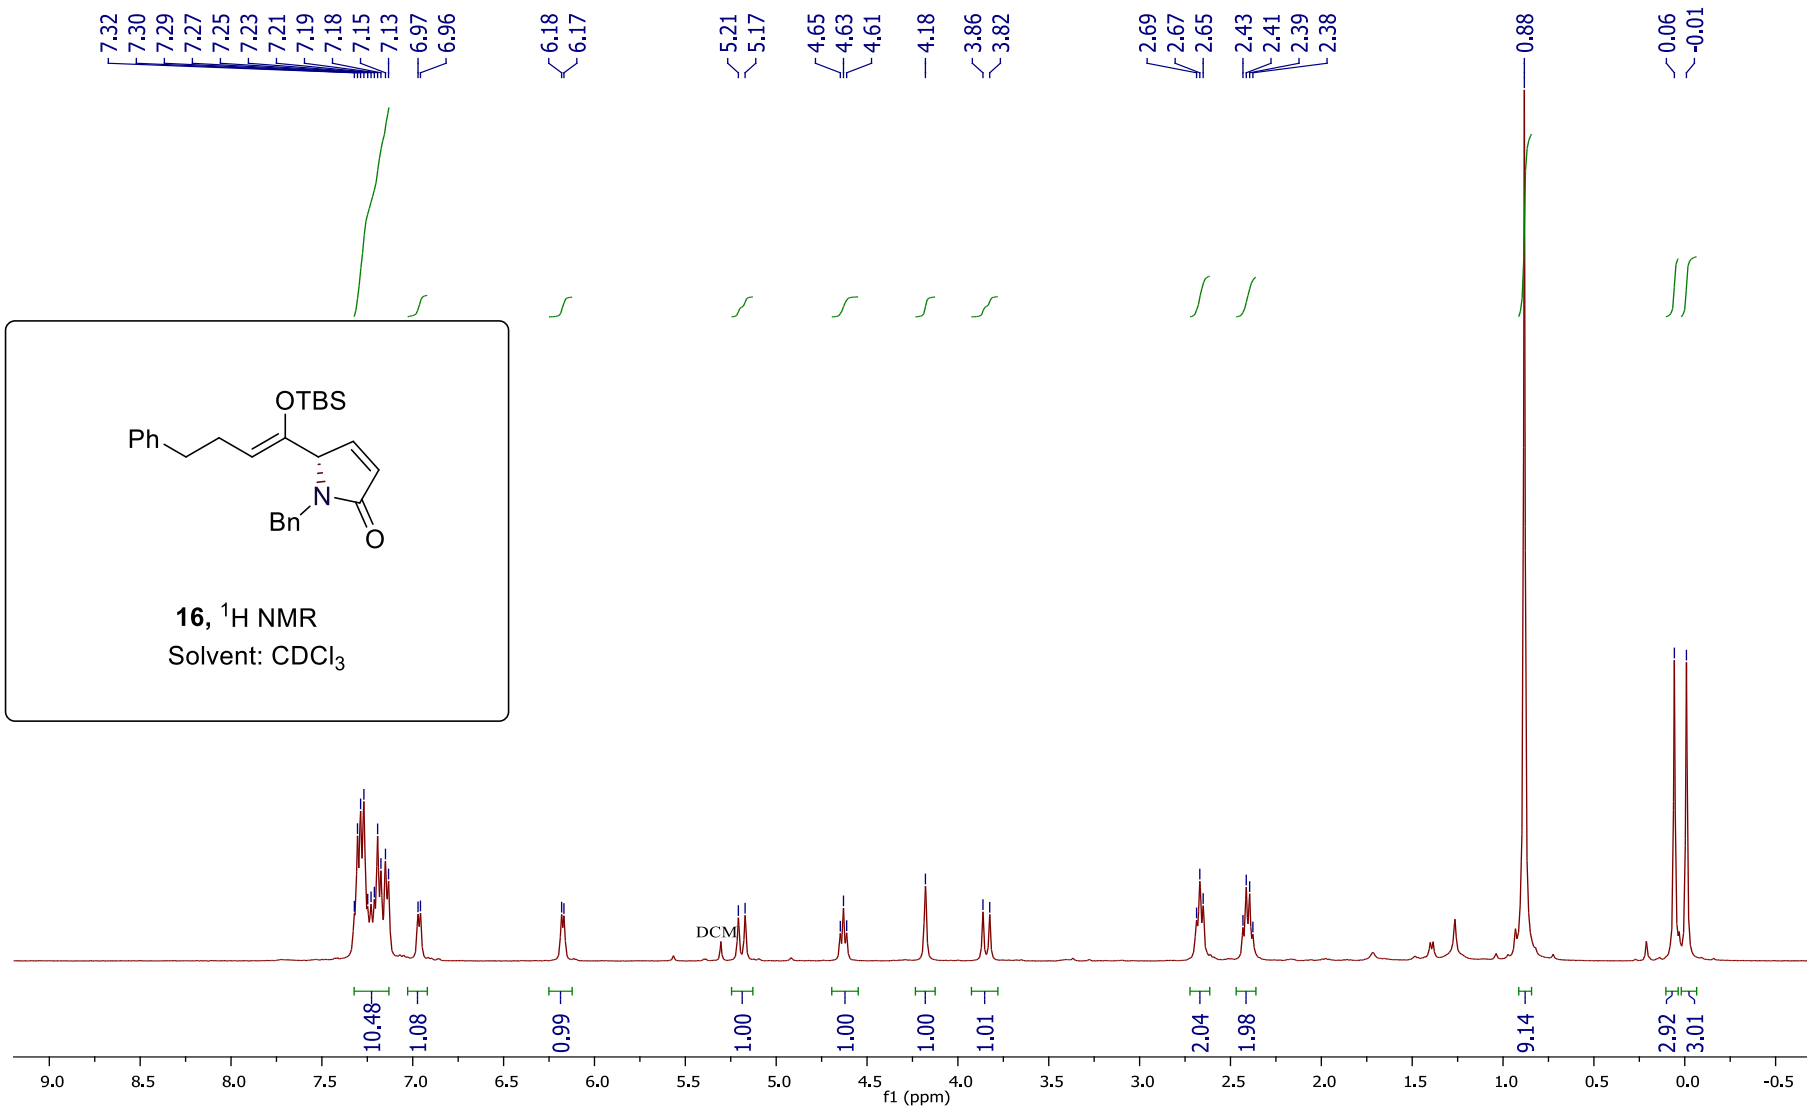

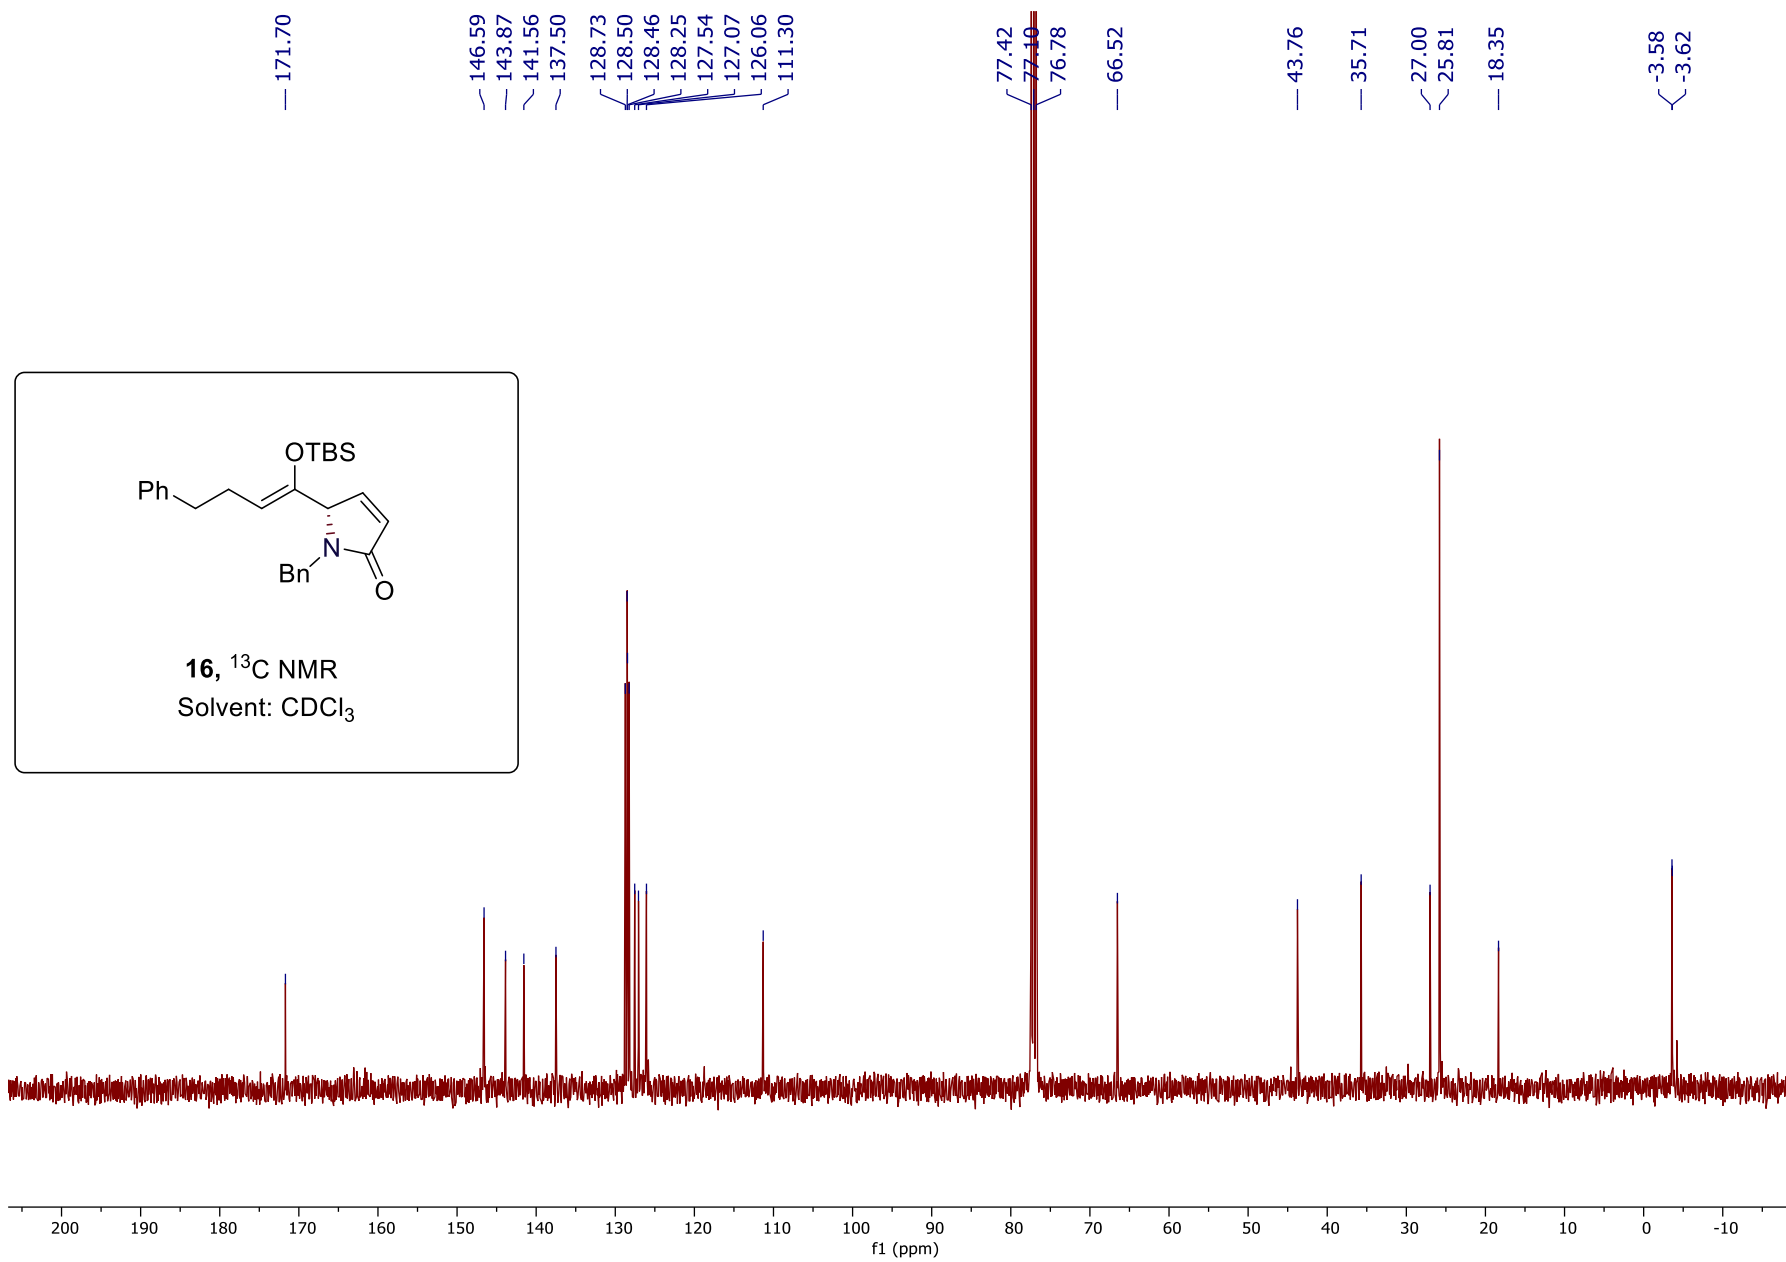

7.30  
7.29  
7.28  
7.26  
7.26  
7.21  
7.20  
7.19  
7.14  
7.13  
7.12  
7.11

5.10  
5.08

3.98  
3.97  
3.96  
3.96  
3.85  
3.83

2.57  
2.43  
2.40  
2.35  
2.32  
2.22  
2.20  
2.16  
1.88  
1.87  
1.87  
1.86  
1.85  
1.85  
1.84  
1.83  
1.80  
1.79  
1.79  
1.78  
1.77  
1.77  
1.76

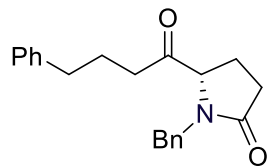

17, <sup>1</sup>H NMR  
Solvent: CDCl<sub>3</sub>

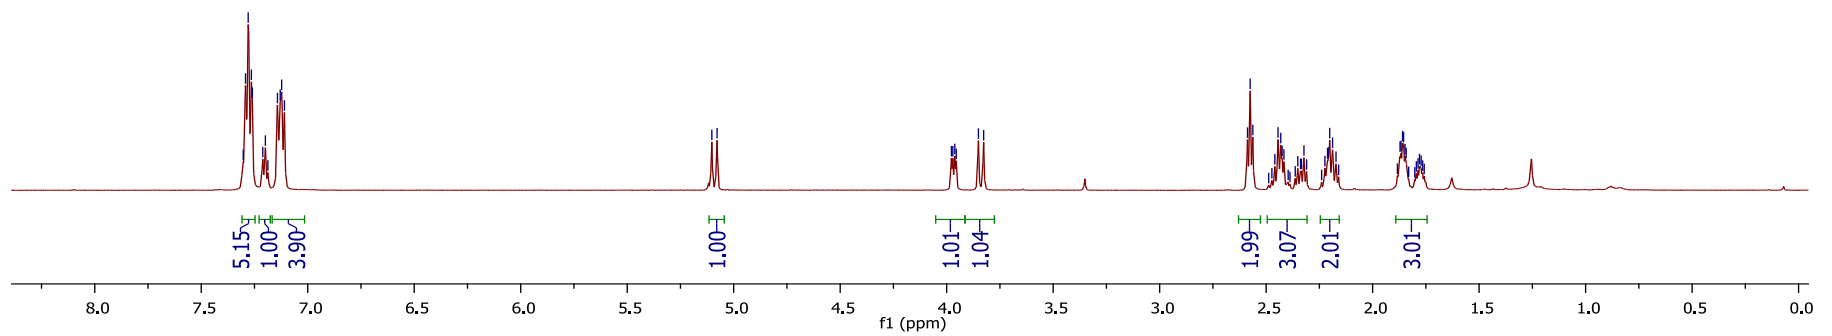



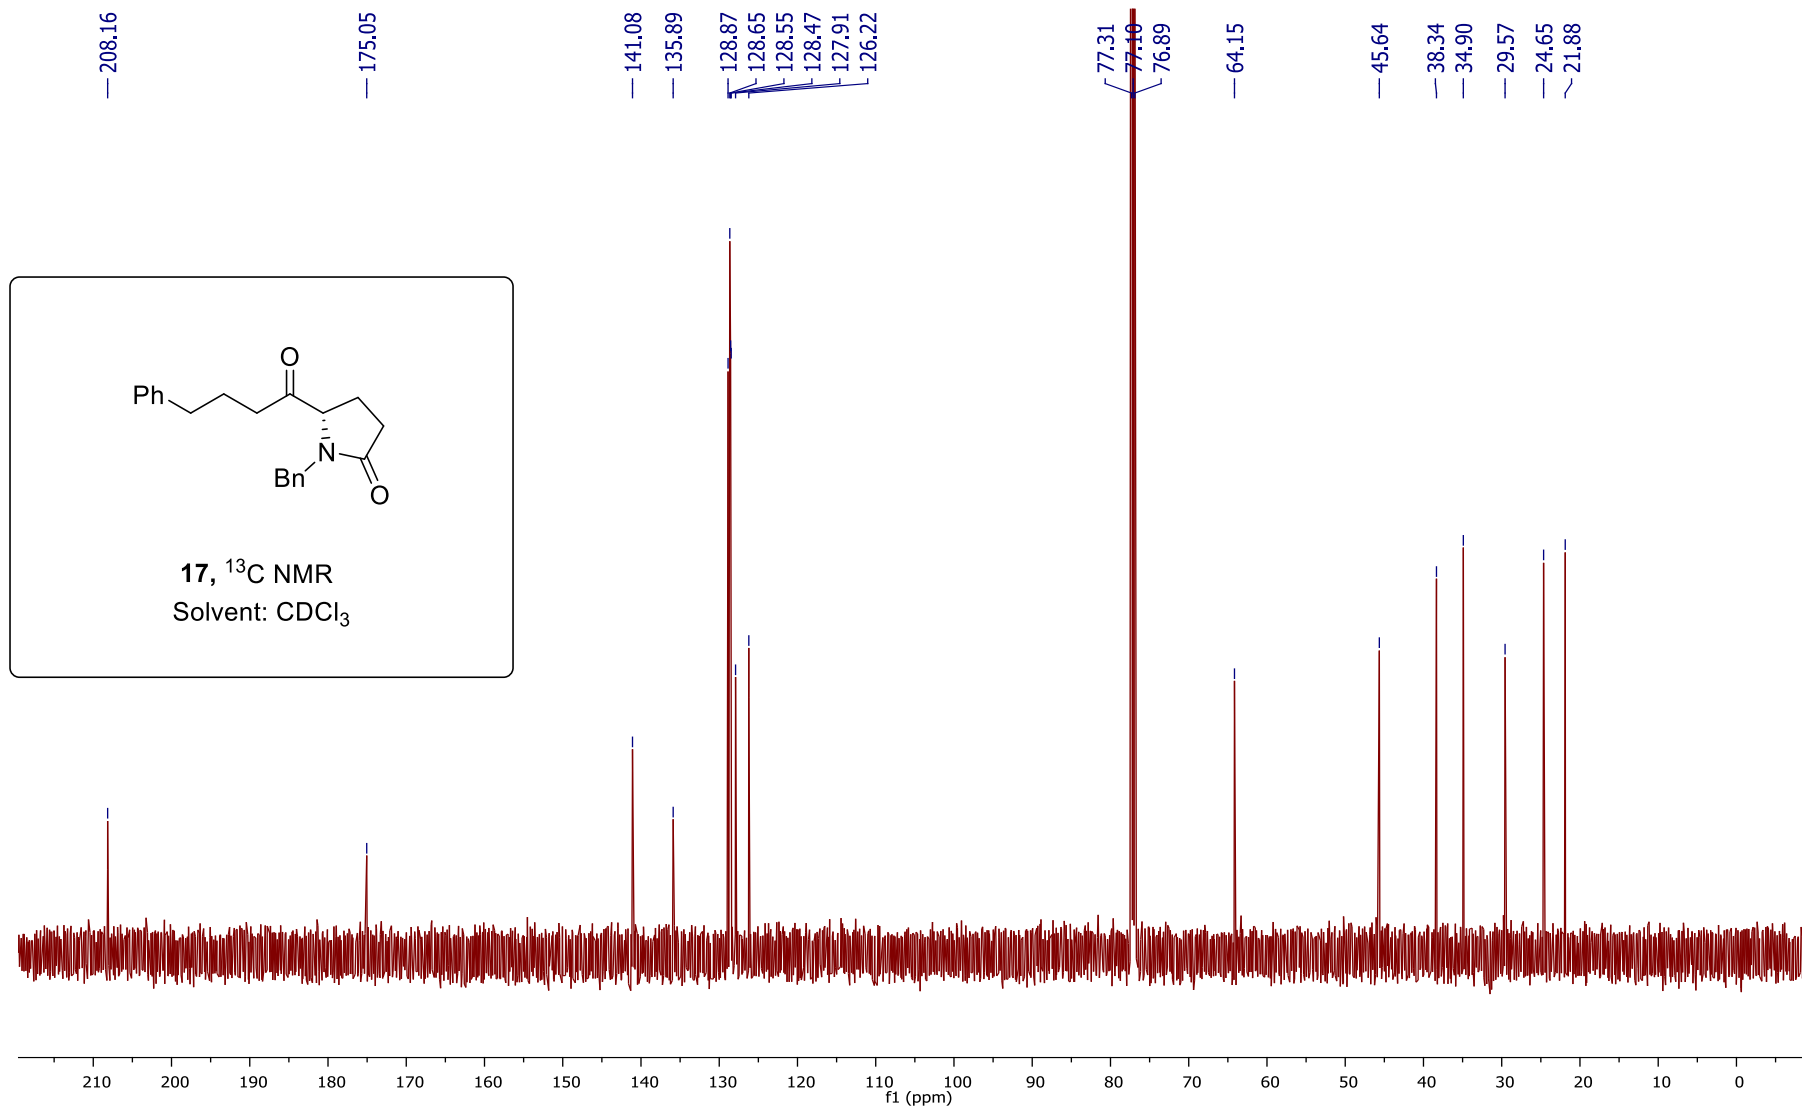

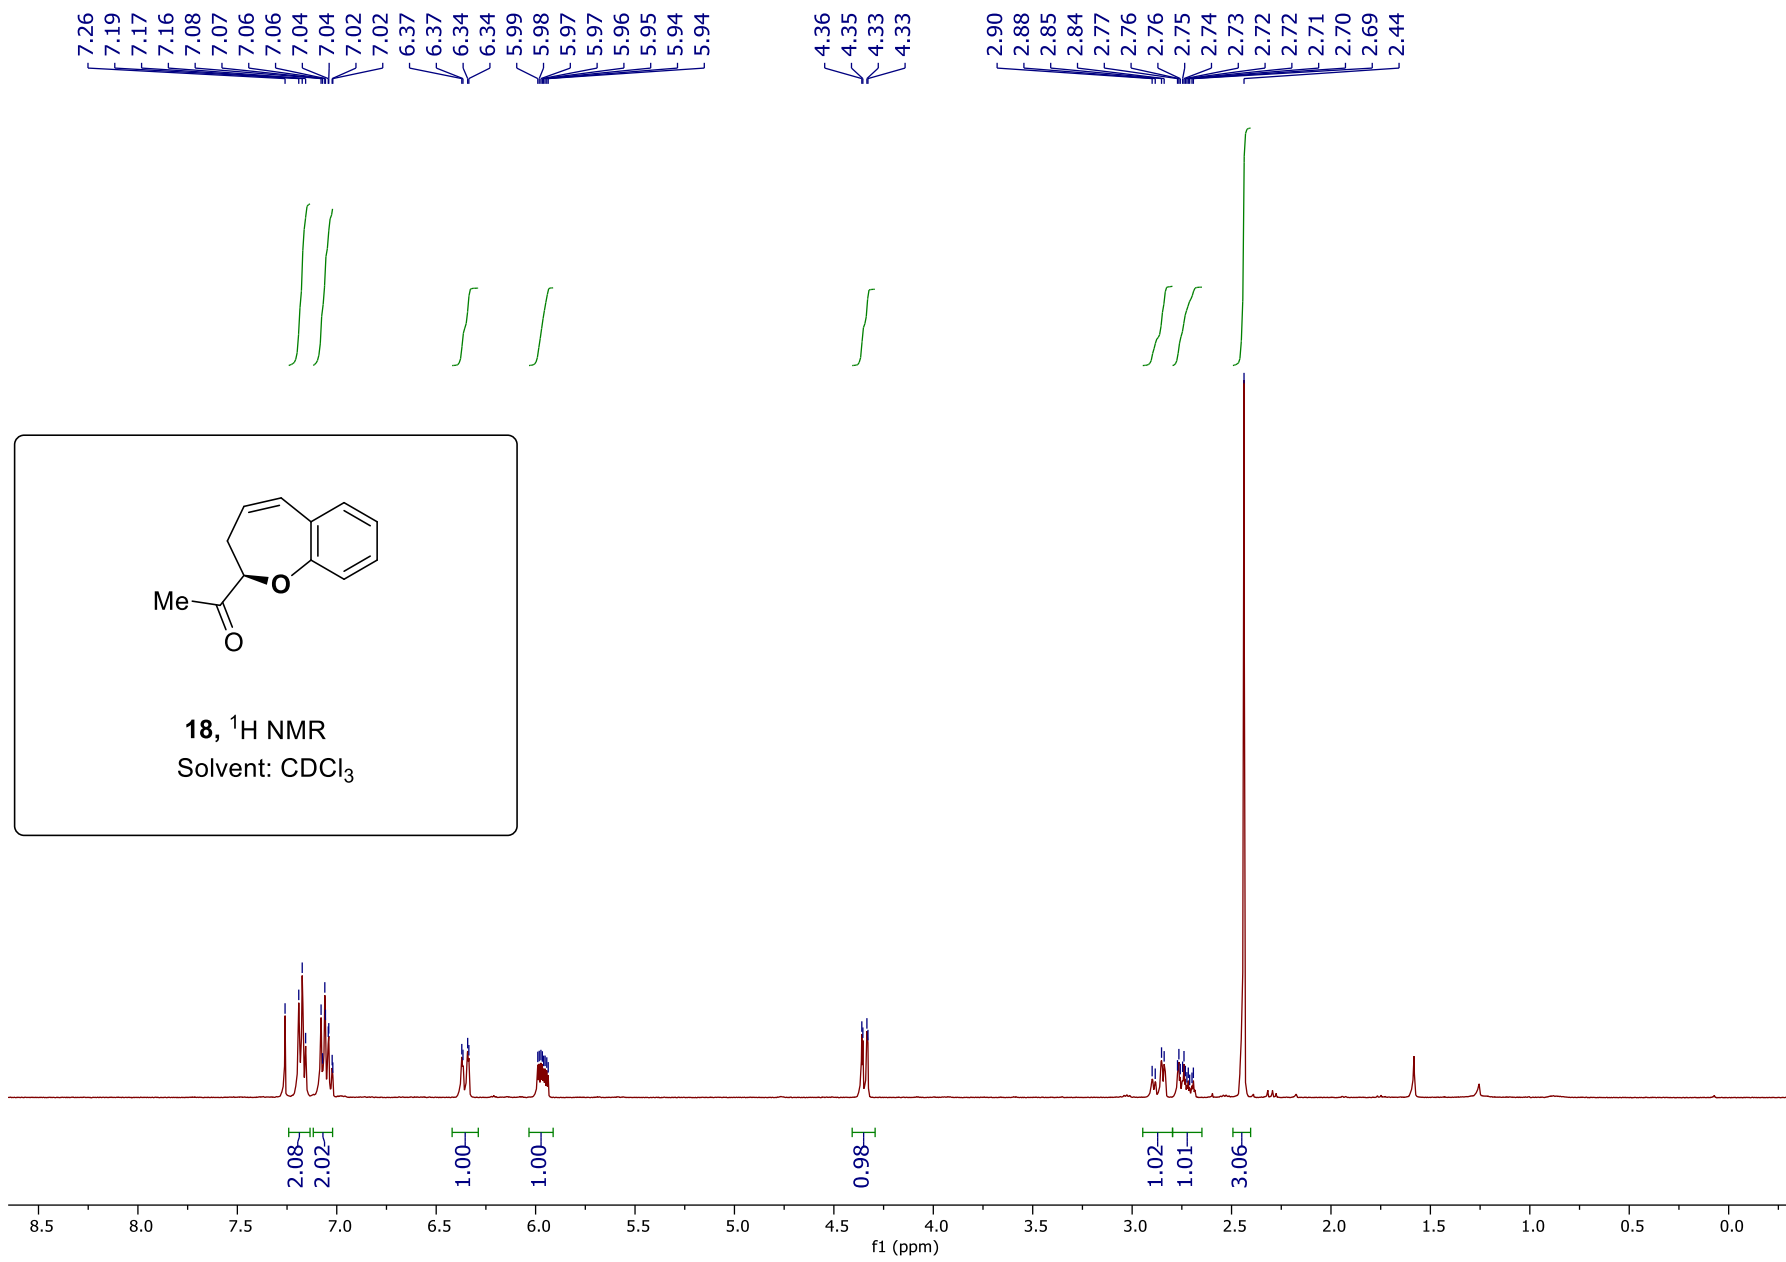

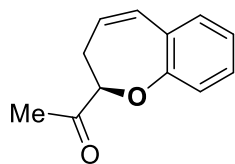

**18**,  $^{13}\text{C}$  NMR  
Solvent:  $\text{CDCl}_3$

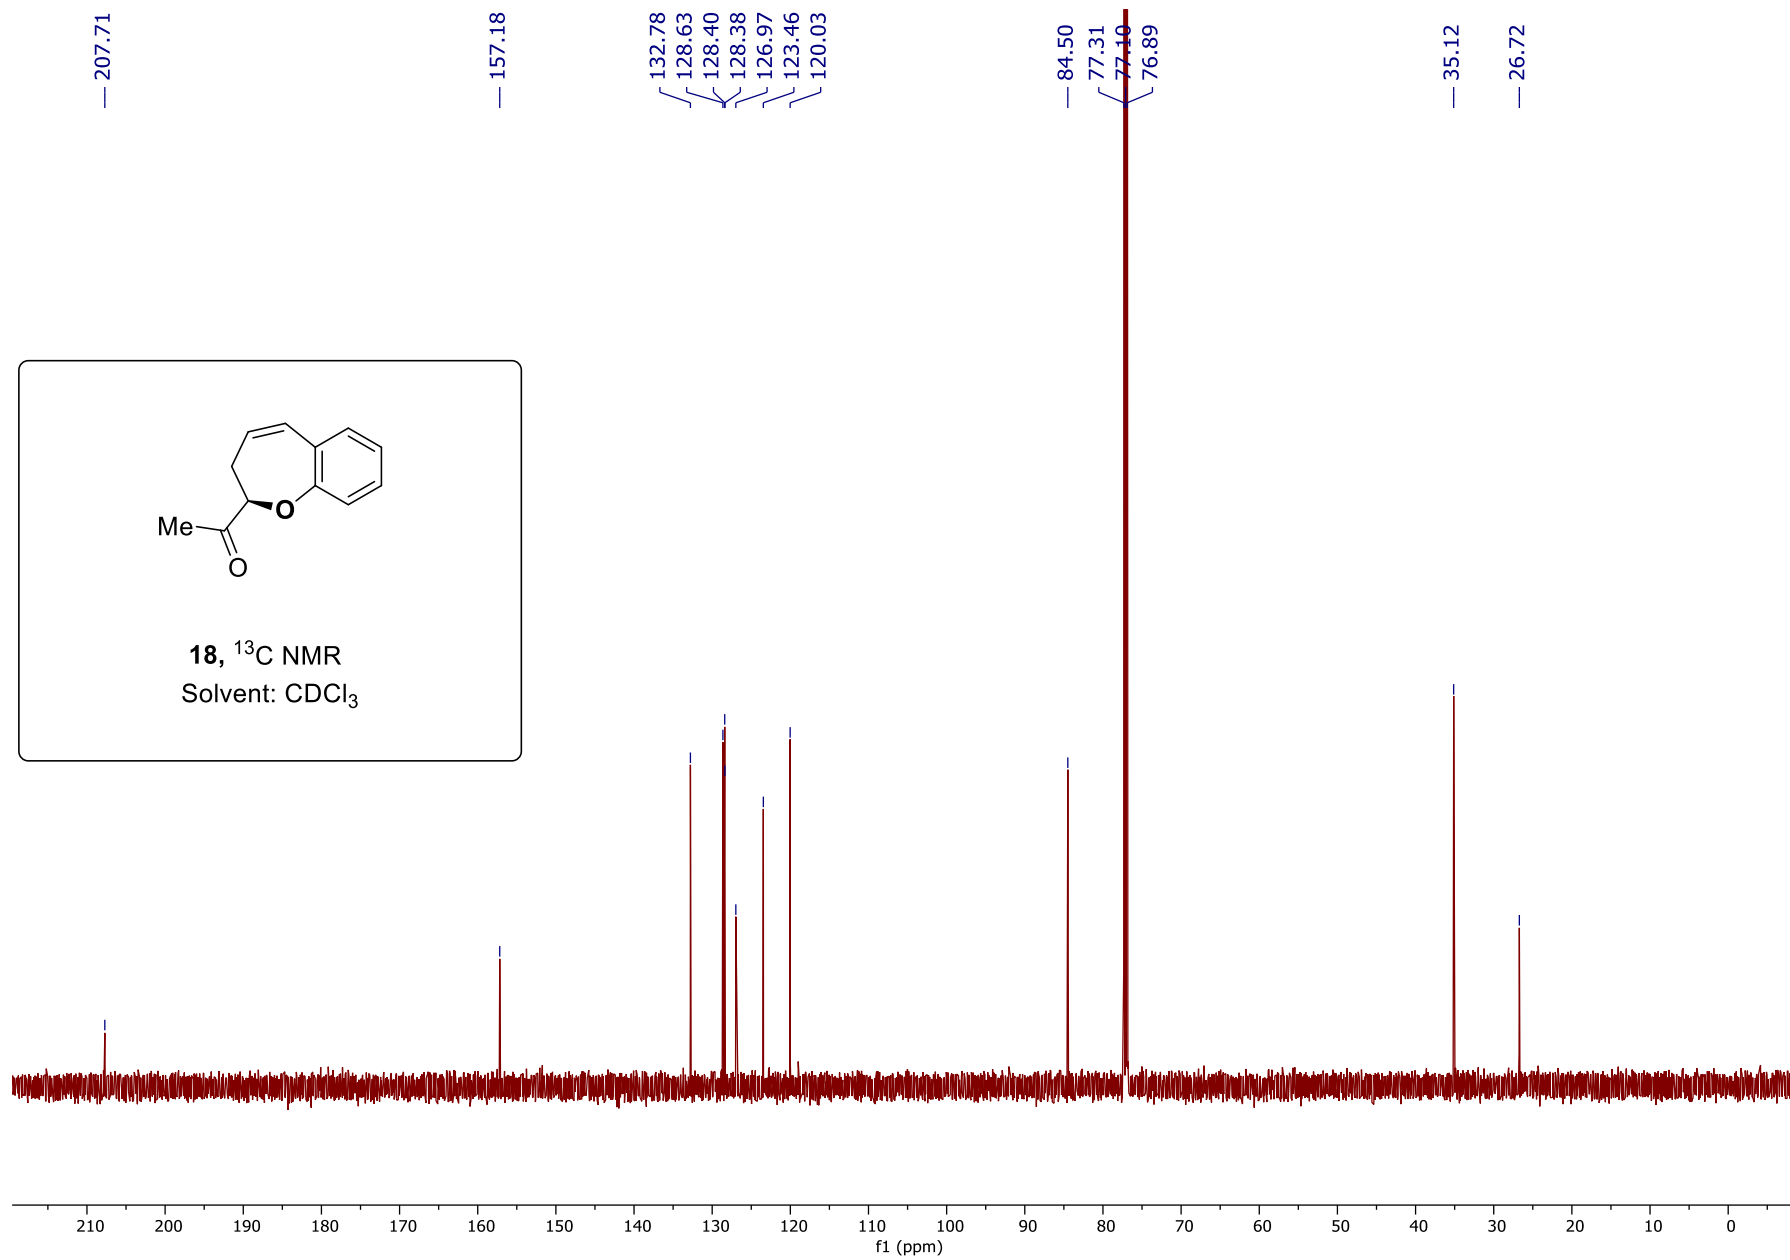

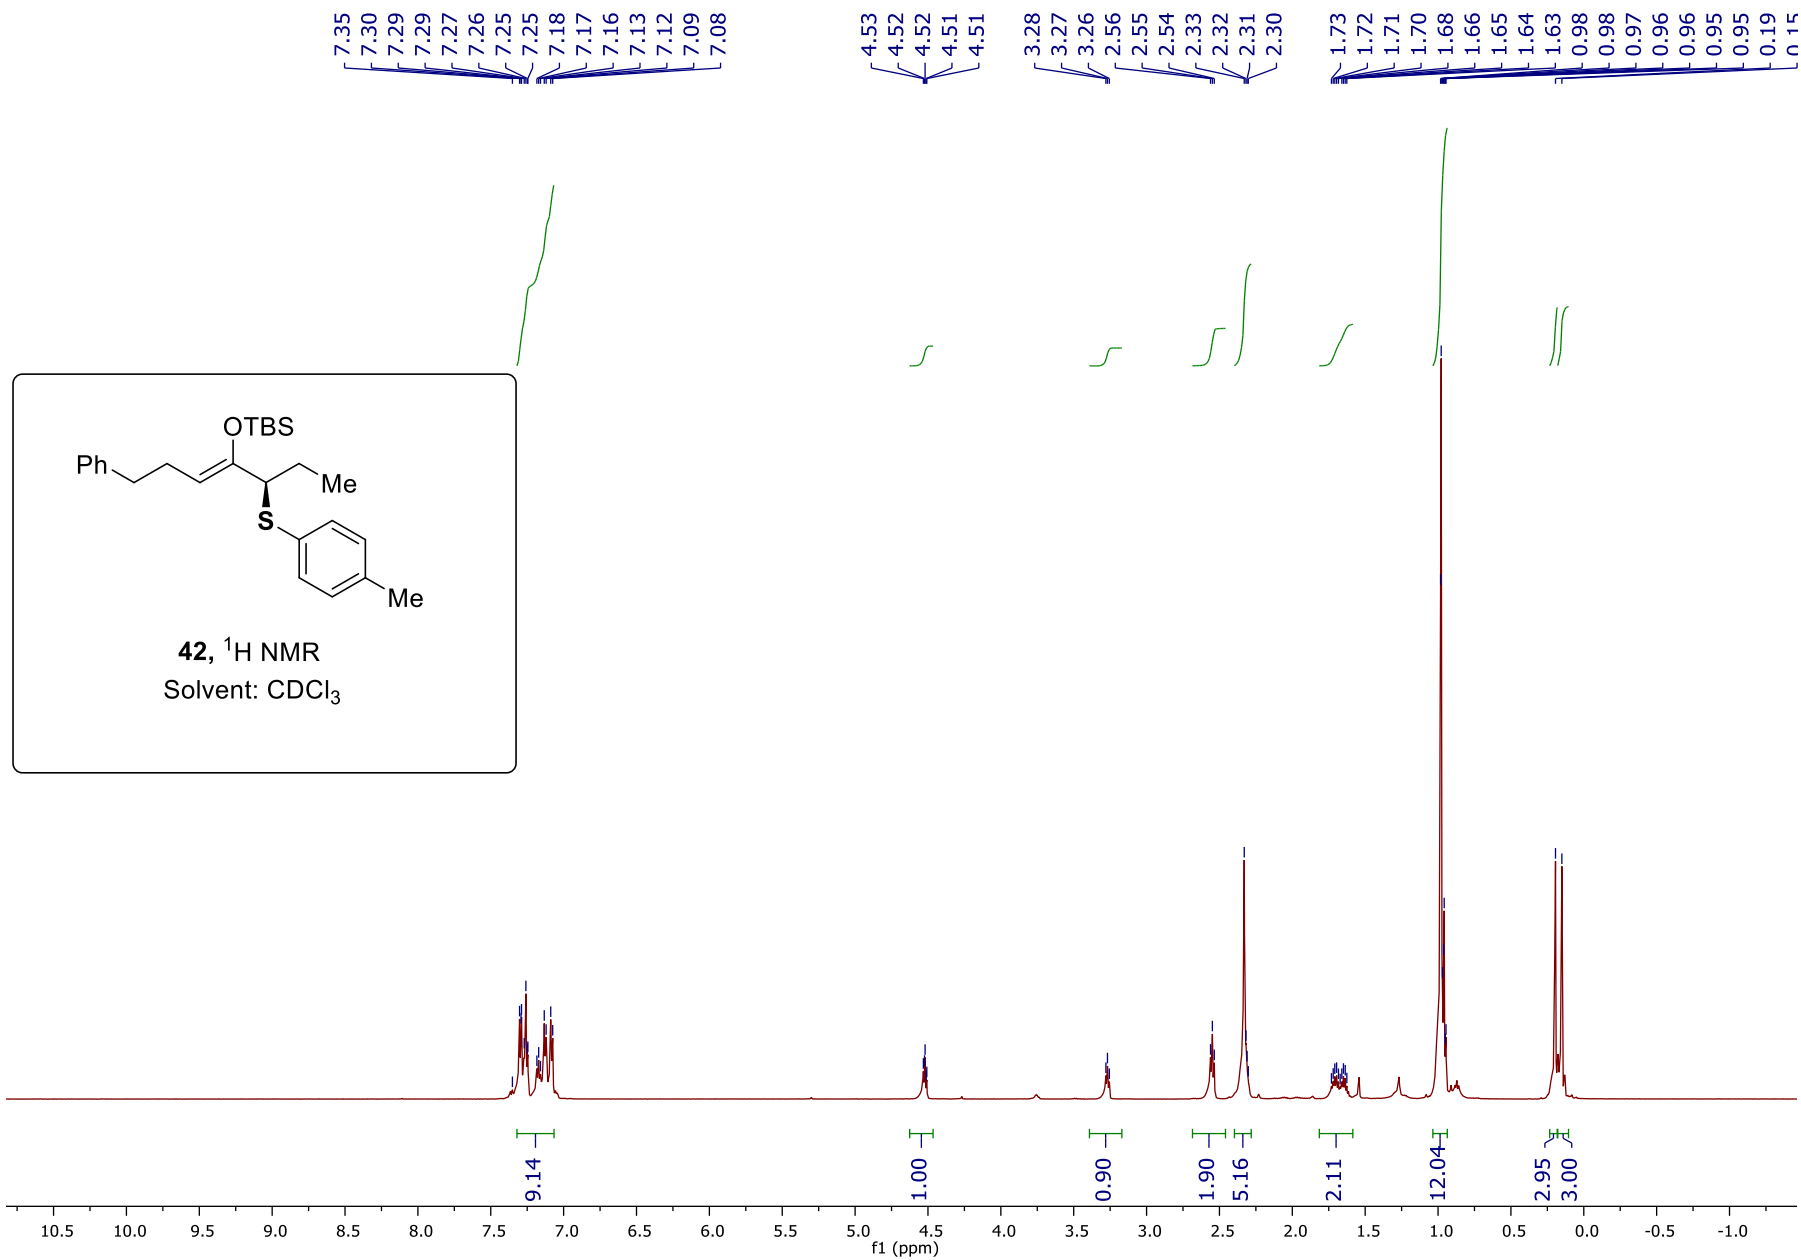

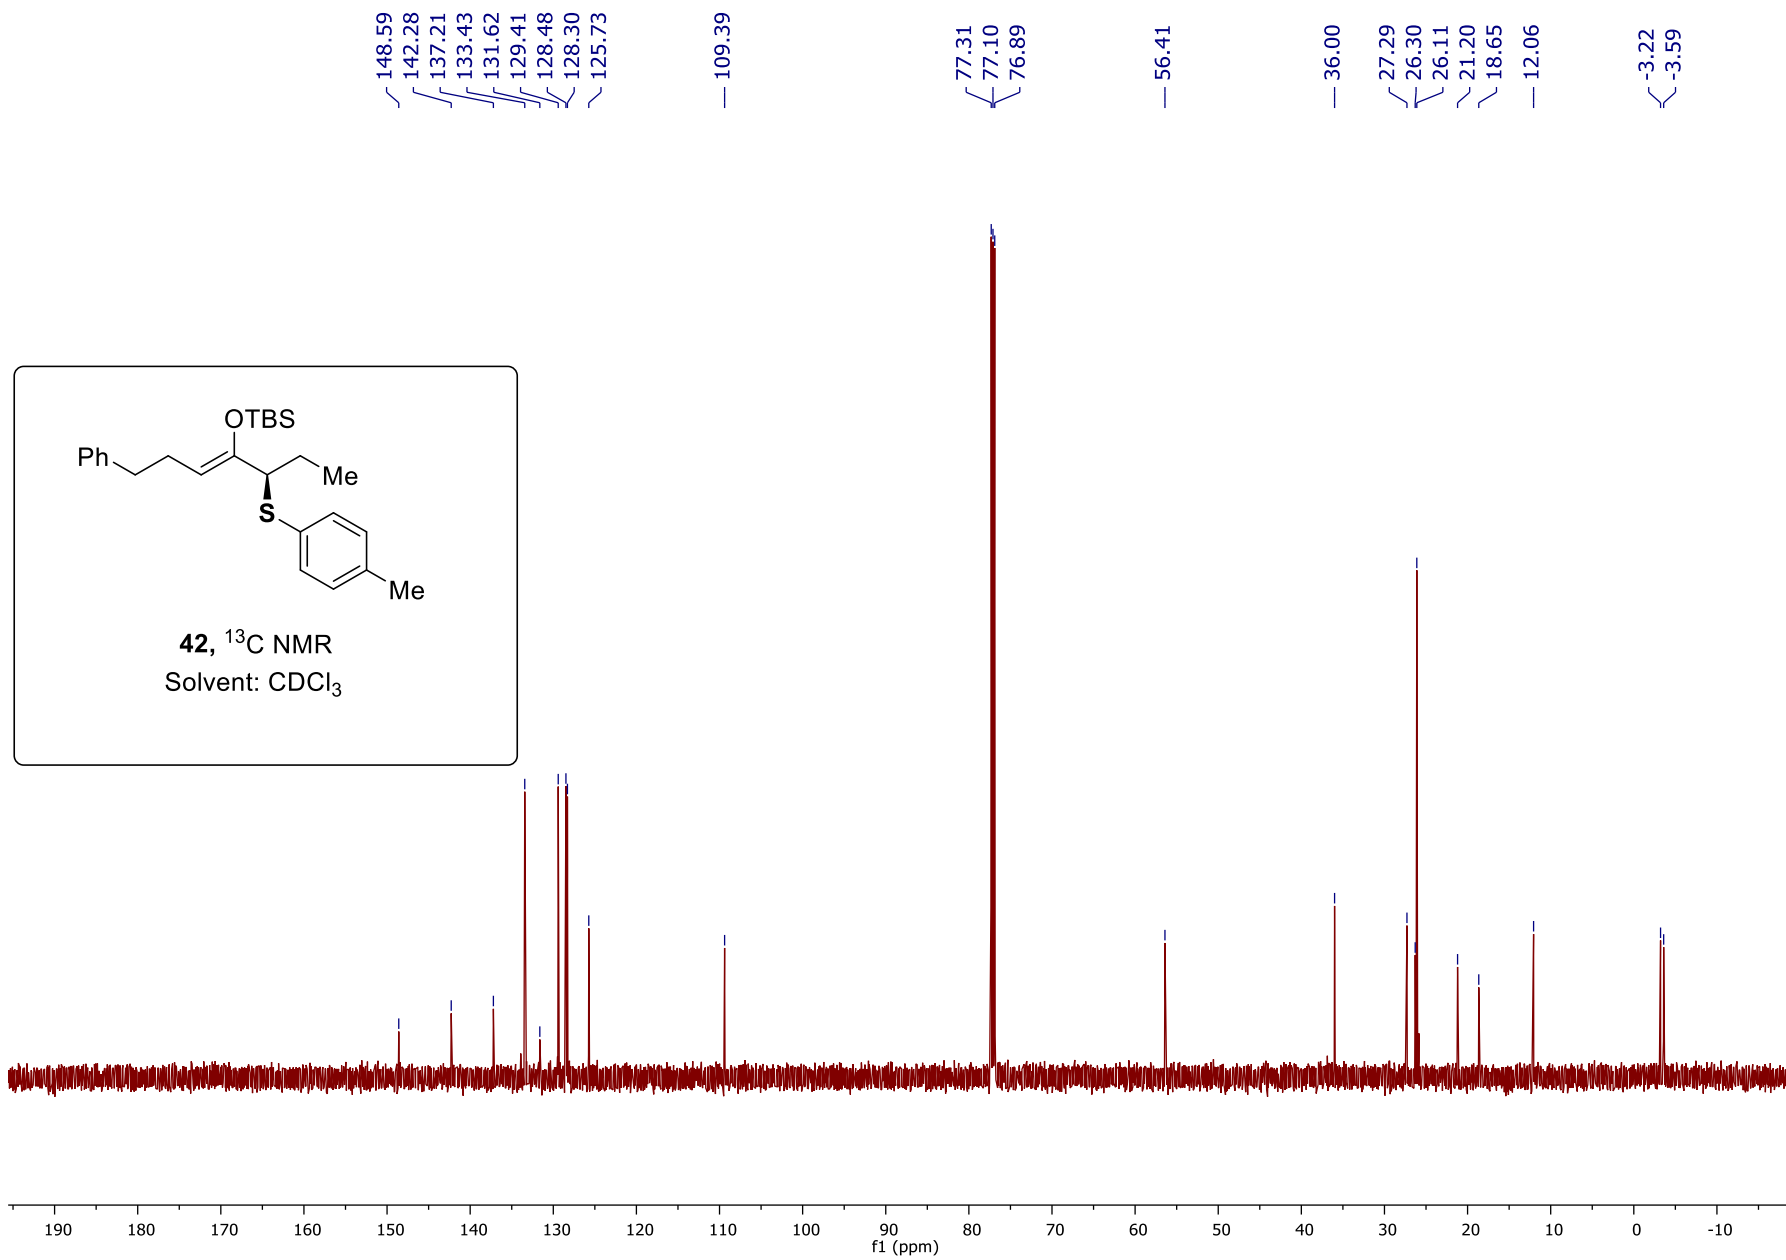

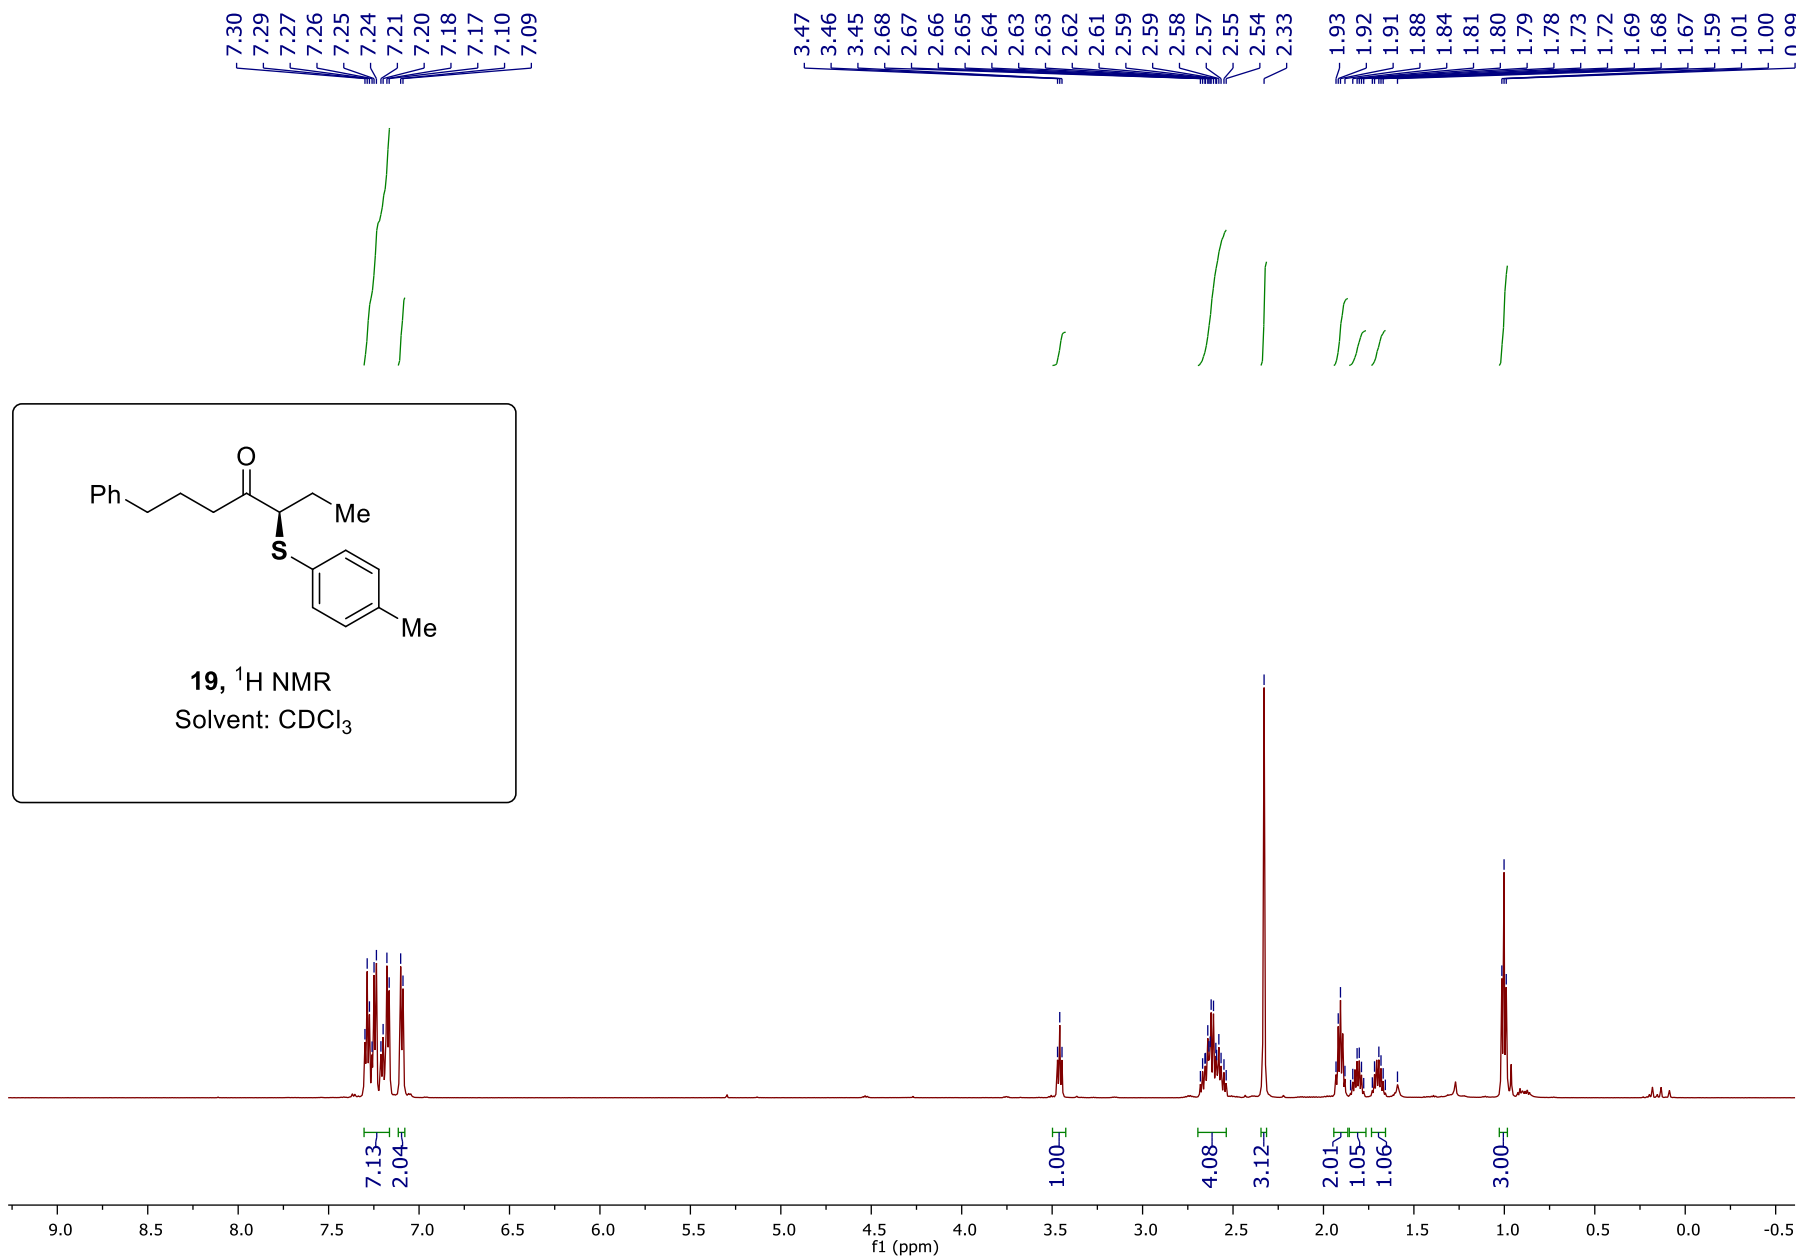

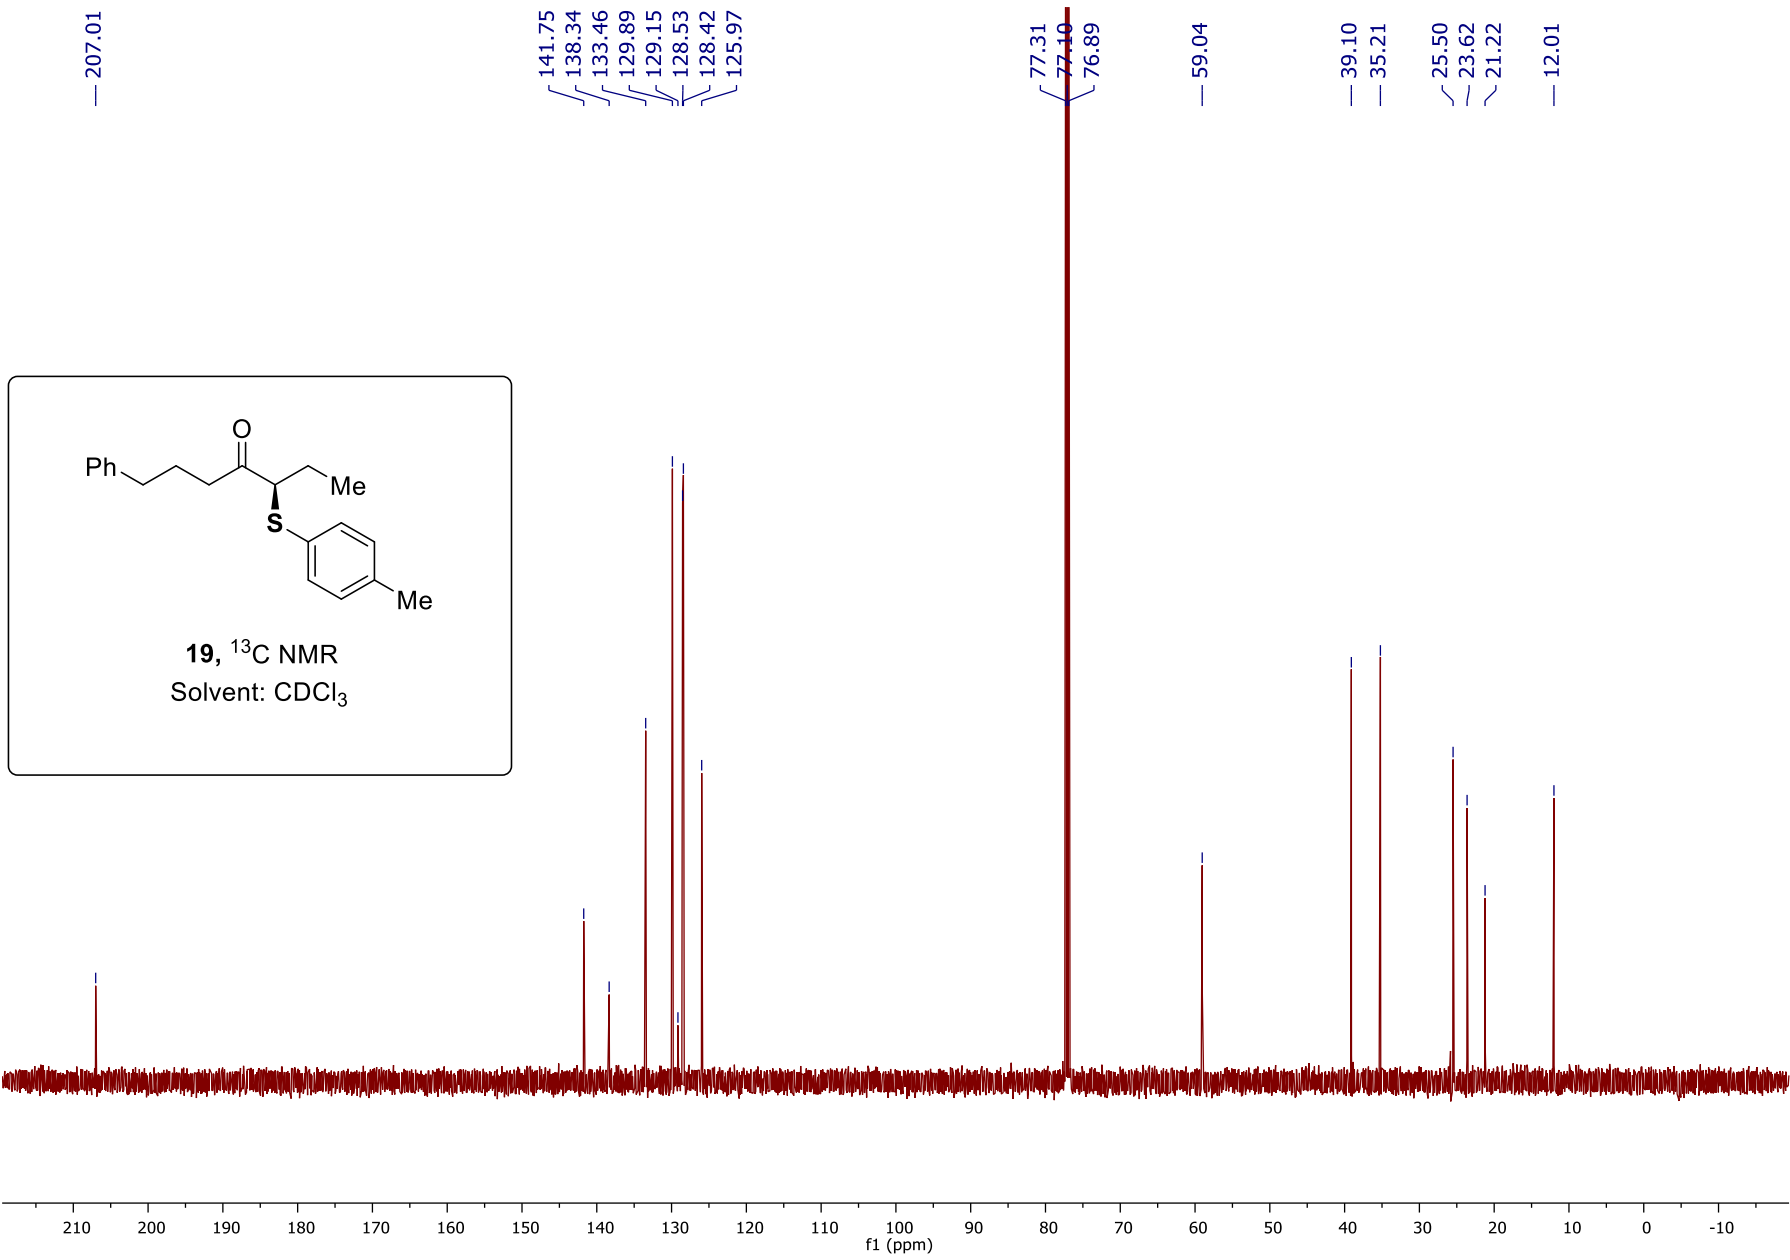

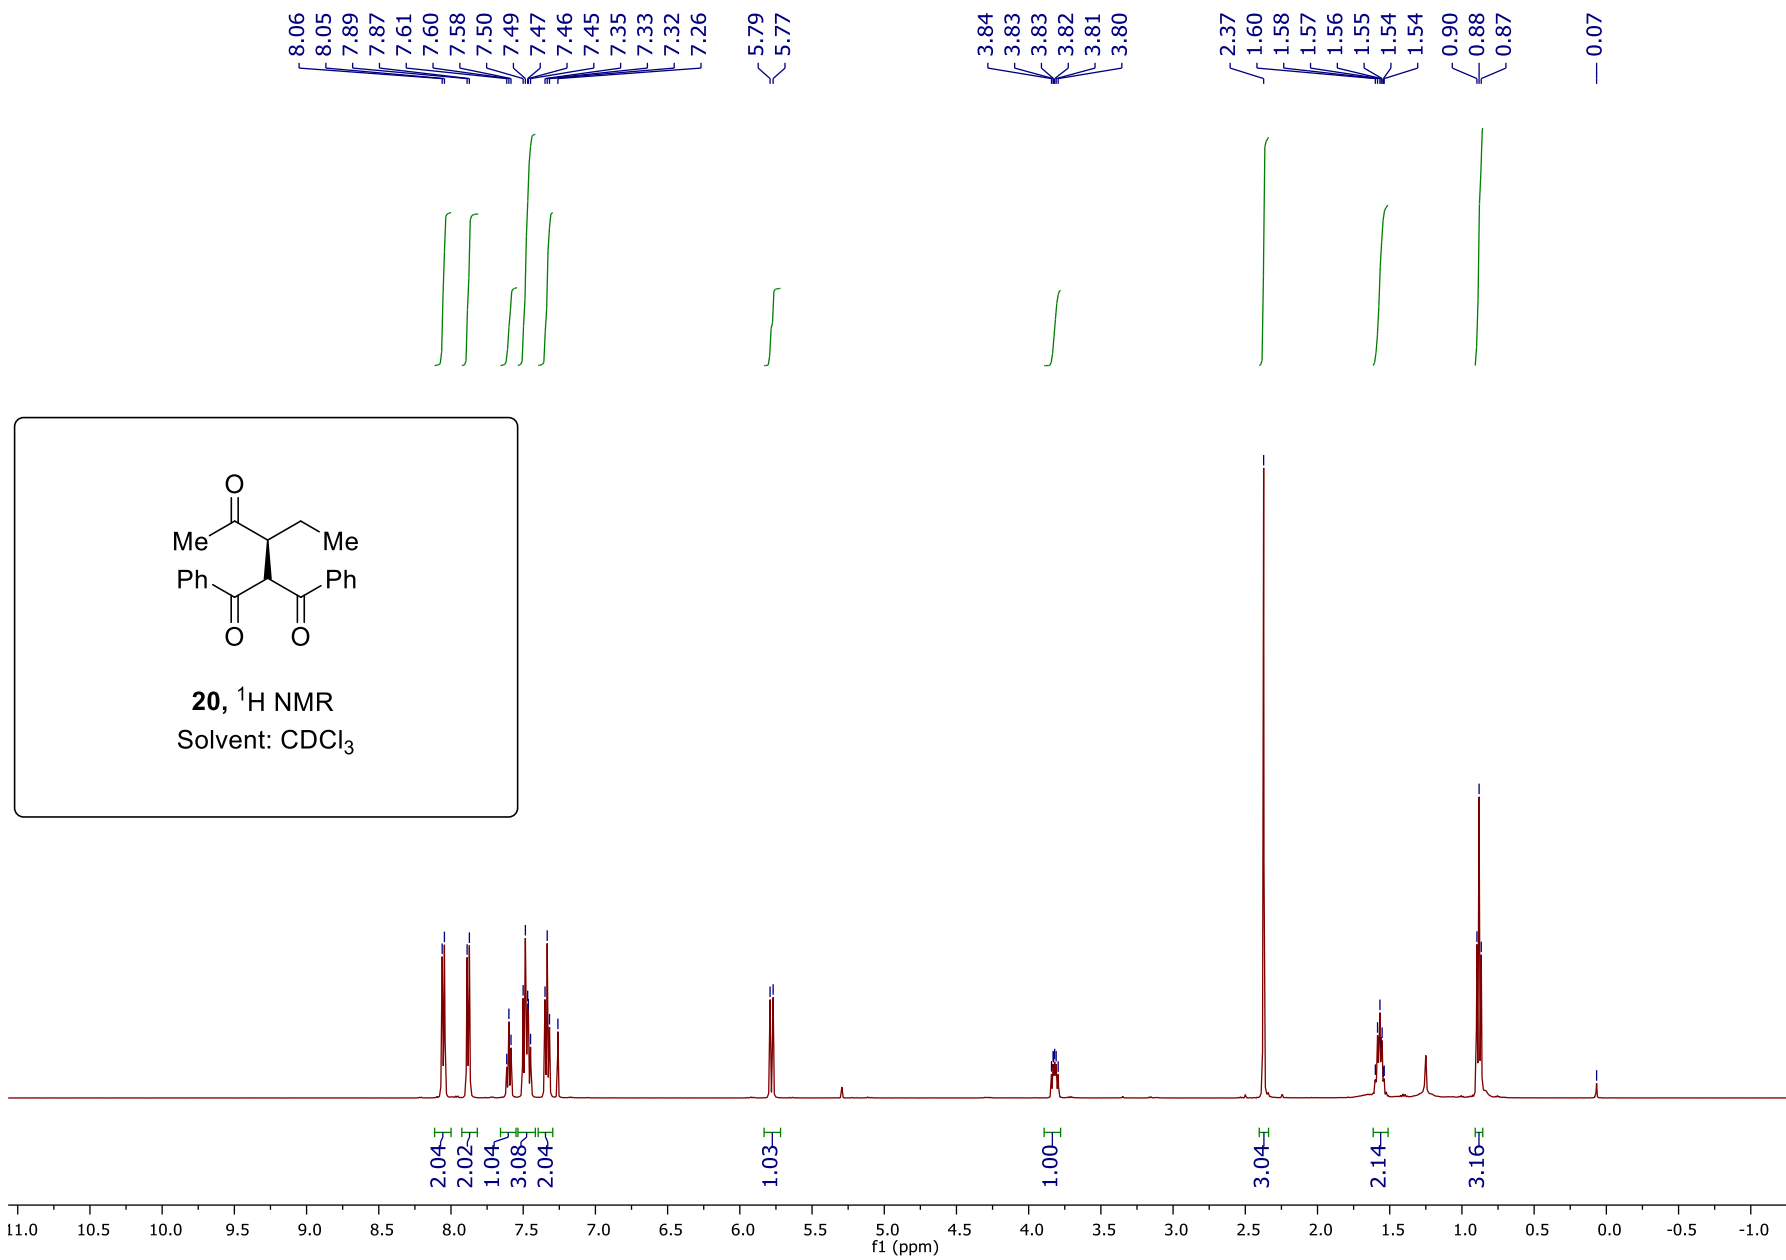



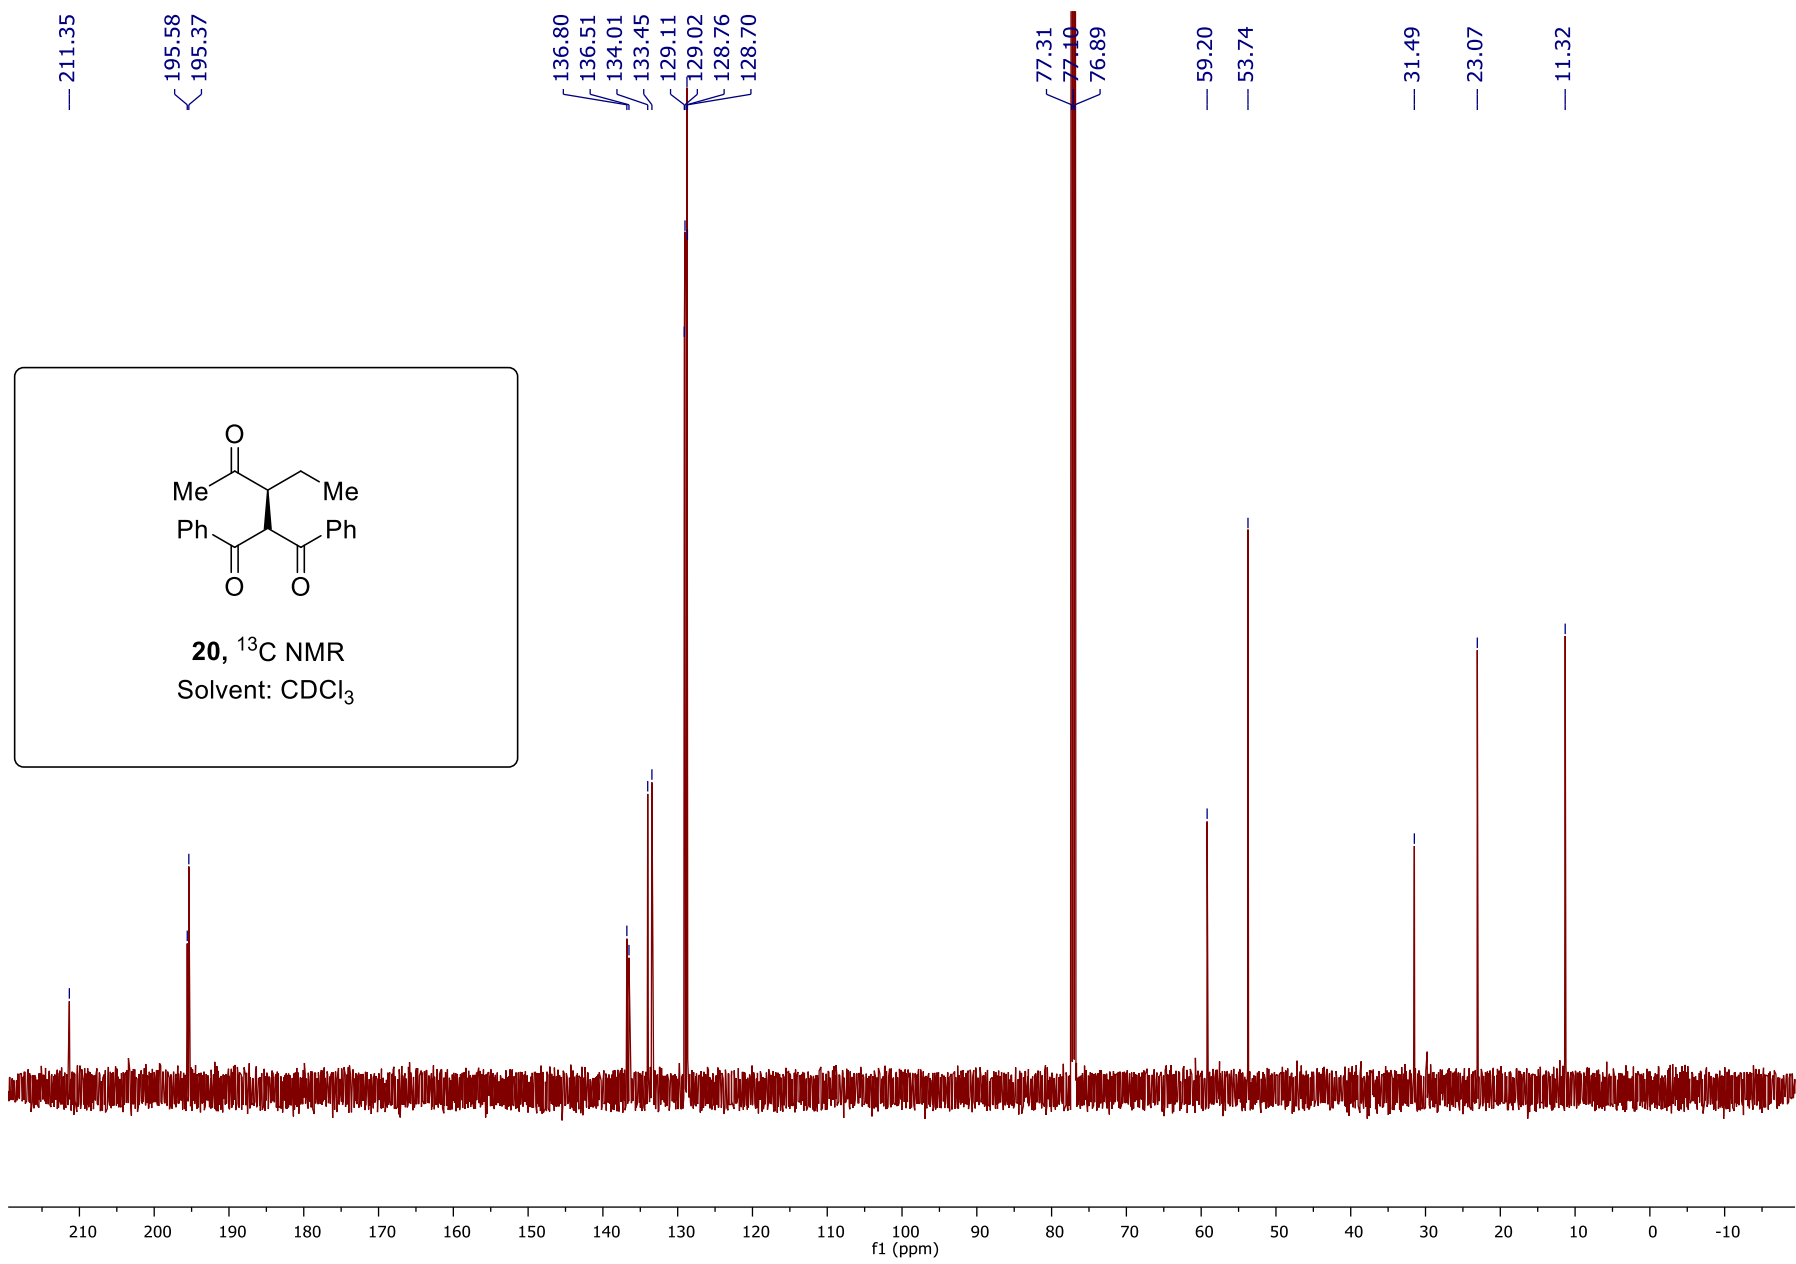

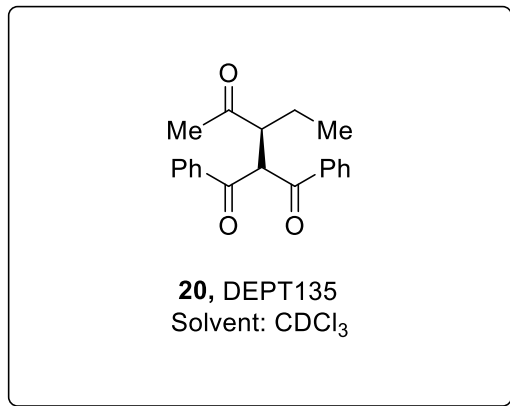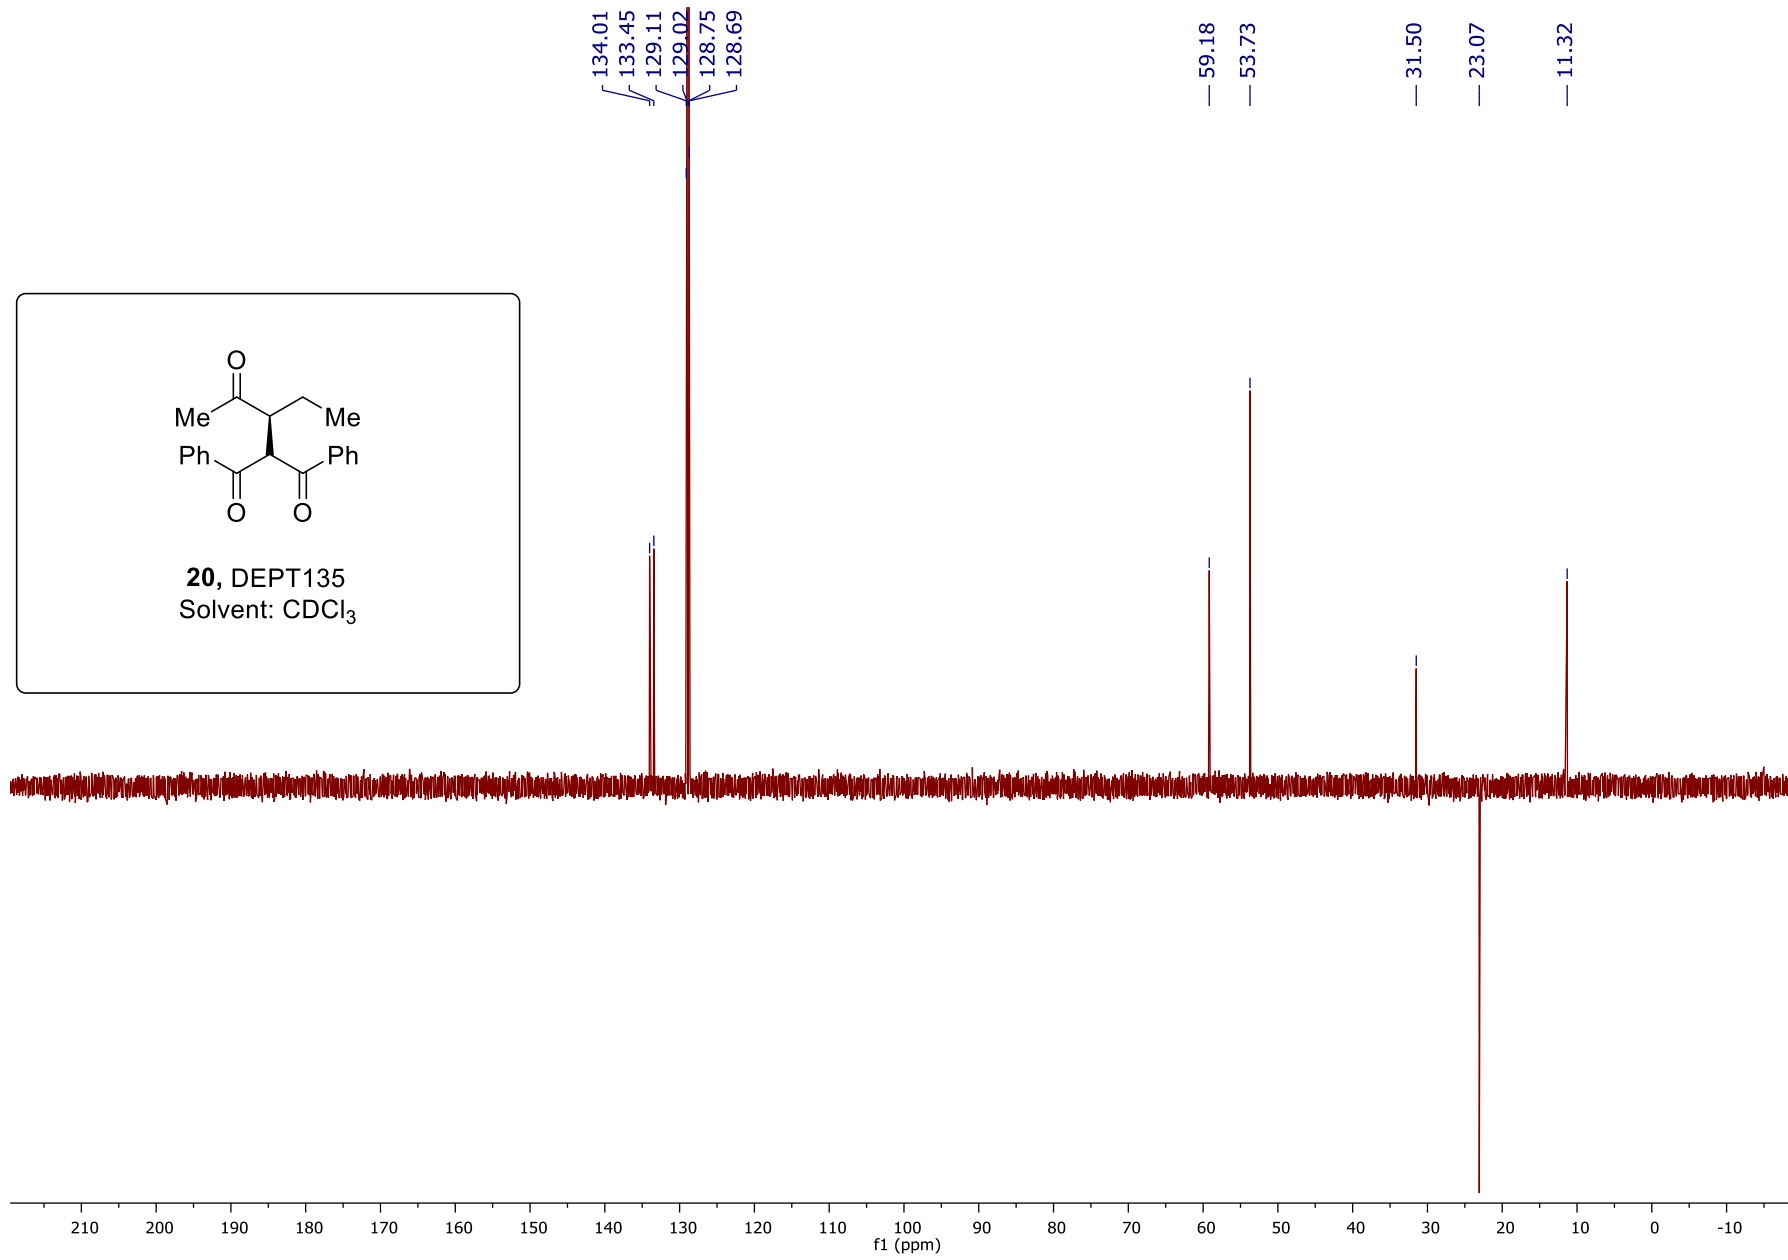

Supplement: NIHMS1508680-supplement-1.pdf [file NIHMS1508680-supplement-1.pdf]
